# Supplementary material for: Single-cell analysis of senescent epithelia reveals targetable mechanisms promoting fibrosis
Source: JCI journal article supplement (doi:10.1172/jci.insight.154124), 2022-11-21
Supplement: sd2 [file 2]

"","baseMean","log2FoldChange","lfcSE","stat","pvalue","padj","rank"  
"Gnai3",3994.05361649944,-0.281617175200882,0.19195856399579,-1.467072  
73350439,0.14235627056793,0.257506500003109,-0.382072926889167  
"Cdc45",138.247738139596,-0.840024416134431,0.313266445201051,-2.68150  
14151781,0.00732926044327393,0.026681463801896,-3.04406888206389  
"Scml2",55.5789031140869,-0.342670953195824,0.396927199659877,-0.86330  
9325965706,0.387967418006837,0.532267711532318,-0.216091283995595  
"Apoh",190.979122501932,1.59343229532112,0.659446105490739,2.416319214  
04,0.0156783097233428,0.0477183846420054,4.84791981513854  
"Narf",963.699609766635,0.209772011356659,0.220128022342157,0.95295459  
9440317,0.340613074290821,0.485295851115997,0.151664445053549  
"Cav2",3036.02344596266,-1.0400450463536,0.409613861062238,-2.53908655  
253142,0.0111142323564362,0.0368358494791421,-3.43348379766423  
"Klf6",8978.05304761691,-0.376970810072955,0.191528835131471,-1.968219  
61462978,0.0490427743566786,0.114670345893575,-0.816403355395693  
"Scmh1",1640.56386433039,0.172102948737793,0.154320475503971,1.1152308  
089756,0.26475152680456,0.406550425585528,0.154900795969626  
"Cox5a",9812.69561344126,0.294146353788565,0.548402801670785,0.5363691  
6677378,0.591703436527986,0.714677173104297,0.0988109210527677  
"Tbx2",4490.2515090332,-0.168297657600532,0.154590939802689,-1.0886644  
3153355,0.276301892283404,0.419868622534628,-0.146050965841667  
"Tbx4",3.17477510445459,-1.29668634477755,1.06883973506469,-1.21317191  
178252,0.225064100641818,0.361051289463199,-1.32098009366858  
"Ngfr",280.790729569748,-2.30731173907824,0.486063170458671,-4.7469380  
0993183,2.06519211805942e-06,4.88086253550576e-05,-22.9060761233315  
"Wnt3",1.95078912944271,0.10646280284053,1.15212567942898,0.0924055463  
231196,0.926375832956093,0.954827720620495,0.004921174076705  
"Wnt9a",141.939329953991,-0.525748221639215,0.262551035238763,-2.00246  
104975782,0.045235168203067,0.107573522334846,-1.1721981072111  
"Fer",454.597879204284,-0.710924466922441,0.21292083375144,-3.33891453  
643452,0.00084106436050873,0.005160186564254,-3.74428457268803  
"Xpo6",2470.21160042978,0.150349963772181,0.164256583499634,0.91533599  
7917645,0.360015266597002,0.505187309687539,0.102662865596269  
"Tfe3",2092.84870026928,-0.501275204740469,0.0890614811026883,-5.62841  
756654031,1.8187038200431e-08,1.27557867205757e-06,-6.80336253074323  
"Axin2",820.147332501563,-1.6775264111466,0.278809550059865,-6.0167465  
9561125,1.77957324179185e-09,2.42644189289913e-07,-25.5515282214686  
"Brat1",1006.12220298906,-0.0533760548824274,0.0984243674894628,-0.542  
305287236332,0.587608213893553,0.711096384961302,-0.0181984215744075  
"Gna12",4888.6413643398,0.233509166741751,0.108831807554948,2.14559669  
629537,0.0319051692570497,0.0823847159547021,0.582921856562509  
"Slc22a18",12140.5619296865,2.28270628583318,0.680568913838162,3.35411  
482866525,0.000796193145231502,0.00494715549576923,12.1187564498754  
"Itgb2l",1.20651734405811,-0.0109343648007026,1.85922588786426,-0.0058  
8113842006751,0.995307557504901,NA,NA  
"Igsf5",1783.76324110783,0.854197716634677,0.245069190297159,3.4855369  
4407249,0.000491150396963428,0.00341205340562352,4.85221972927109  
"Pih1d2",116.541251562828,0.876020816525491,0.213861583949909,4.096204  
6588539,4.1997868207654e-05,0.000506729229153984,6.64683752144562  
"Dlat",6262.87826308798,-1.0936417805528,0.554857536287446,-1.97103167

755521,0.048720252588121,0.114148940755009,-2.37347737071588  
"Sdhd",8224.43720760952,0.0882072880413053,0.473226467580533,0.1863955  
08459793,0.852134614440915,0.905988369724028,0.00870860057906509  
"Fgf23",0.473898998762002,-2.0686958498418,3.6726186301166,-0.56327543  
3195774,0.573247344022778,NA,NA  
"Fgf6",0.639788793777739,-0.545076952324287,3.11189966431838,-0.175158  
909708511,0.860954770425797,NA,NA  
"Ccnd2",4174.77206247162,-1.14856298982031,0.238356319647538,-4.818680  
66900309,1.4451063095761e-06,3.66883890938995e-05,-11.7303315032461  
"Gpr107",2872.40013520276,0.134130850112663,0.12037325005153,1.1142911  
7395471,0.265154292159452,0.407020814716186,0.120569007689627  
"Nalcn",28.9807315908501,-1.34917784703676,0.366259956855272,-3.683661  
89583179,0.000229907148652997,0.00188905587207591,-8.4616091742174  
"Btbd17",52.2070494435933,-1.05427860875801,0.588948723099481,-1.79010  
254612595,0.0734374275728188,0.155825765895617,-1.95992162573951  
"Slfn4",108.493149264541,-0.2452175230876,0.422265825331513,-0.5807183  
73065317,0.561430276768073,0.689516725650283,-0.0911631267997682  
"Th",6.84565442332041,-0.445406850408982,4.57146600873375,-0.097431950  
6167247,NA,NA,NA  
"Ins2",0.592160316975129,1.47341162443337,3.49023380387325,0.422152700  
1424,0.672913563602859,NA,NA  
"Scnn1g",1367.47701181577,0.995289599628335,0.386198359863824,2.577146  
10693655,0.00996198324401017,0.0336635614023761,3.37536472478088  
"Drp2",35.1325927915819,-1.57723761906294,0.455337610307513,-3.4638860  
998057,0.000532431901474753,0.0036362021768668,-8.85905270595783  
"Tspan32",369.340280841097,-1.26229461200585,0.428653219392613,-2.9447  
920950984,0.00323171740114696,0.0142852019695224,-5.36289792256091  
"Lhx2",6.78440634004687,-1.41457802734792,0.781230027706203,-1.8107061  
6486838,0.0701863480617487,0.150368367397393,-2.68015460828284  
"Clec2g",4.93393117725118,-1.64424445043489,0.874571923801313,-1.88005  
62946135,0.0601004060969481,0.133756160036331,-3.3077871314857  
"Gmpr",3092.4021453868,1.42062669367278,0.327734960660349,4.3346815695  
5358,1.45971264371959e-05,0.000226396504312416,11.9236361454706  
"Mid2",858.765760359241,-0.111552985672782,0.105227812448987,-1.060109  
32924089,0.289094864045374,0.433054503829519,-0.093357766035621  
"Trim25",4164.56756190698,-0.119740606210616,0.103712022633451,-1.1545  
4894399095,0.248275184701419,0.38767274375817,-0.113465448770805  
"Dgke",652.820684556902,-0.824666827215542,0.262679245203488,-3.139444  
17868531,0.0016926866052947,0.00883877970809749,-3.89952488151478  
"Scpep1",4664.32516190261,0.2930350517823,0.180518312492728,1.62329820  
025381,0.104525674103156,0.203946922211882,0.465895111409853  
"Mnt",1440.32572724291,-0.122122194221025,0.176411713407194,-0.6922567  
207266,0.488776124023889,0.625379412442928,-0.0573237615005008  
"Itgb2",1677.31094664322,-1.46881997705236,0.39078908884207,-3.7586002  
7567443,0.000170866558974749,0.00150058588251565,-9.55012010762065  
"Hddc2",470.70263466457,0.340292355413485,0.217028089907283,1.56796456  
882085,0.11688940137358,0.222092140711563,0.512025294243721  
"Tpd52l1",548.566424233774,1.22592050978175,0.39951480719906,3.0685233  
380372,0.00215119525079874,0.0105705657762283,5.57754842030205  
"Pemt",105.699190064301,-0.609322611058977,0.446298239265298,-1.365281

23449927,0.172164674673616,0.297436366009761,-0.738837161982115  
"Cdh1",7290.49591938831,0.265510266238952,0.256918430656591,1.03344188  
09908,0.301397155655982,0.446108190813638,0.2143182343935  
"Cdh4",145.453986132641,0.759028018861017,0.440764834328435,1.72207027  
363582,0.0850567892398801,0.174315458965649,1.32593742258478  
"Ckmt1",2787.92013157938,0.86435834057346,0.26961507759193,3.205897638  
5649,0.00134641874987437,0.00739923133738739,4.24086974679507  
"Bcl6b",784.825908607622,-1.18566341722796,0.383469172368372,-3.091939  
33349348,0.00198853484261184,0.00995186148902611,-5.46590320881013  
"Clec10a",986.217265552283,-1.42458423935259,0.254128910796143,-5.6057  
5431929253,2.07349910700748e-08,1.40378769404277e-06,-19.1981765520021  
"Alox12",353.396215978732,-0.265363894356786,0.180619688897789,-1.4691  
8586769881,0.141782382390081,0.256671124924648,-0.360884197680169  
"Arvcf",3324.14906632318,0.0225918408652783,0.331540426981509,0.068142  
0394820757,0.945672565441473,0.966491439405485,0.000769994045273786  
"Comt",11024.1880502375,-0.672780352361872,0.415707149994413,-1.618399  
76139673,0.105576473409368,0.205401125377754,-1.06487035201776  
"Rtca",1213.82215112459,0.0714725028717535,0.173804151329589,0.4112243  
71368545,0.680908019232415,0.785257263795684,0.0172780408943538  
"Dbt",4164.25816025346,0.769913753010114,0.324801689026765,2.370411789  
78188,0.0177682832462937,0.0524600222192964,2.26947775778019  
"Dazap2",11227.0745748787,0.0690100436455933,0.244337578059517,0.28243  
7291036681,0.777608224294335,0.856260527322017,0.0107090196200029  
"Mcts1",1262.753044552,0.239565514851586,0.170938337014556,1.401473297  
53879,0.161072587100007,0.282715530699263,0.302646487697026  
"Rem1",1000.41286130837,-0.863976221726946,0.34528999724535,-2.5021756  
4545618,0.0123432670238733,0.0397493998767156,-2.78646201386961  
"Rnf17",16.9636971347427,0.755721035984204,0.81204264854561,0.93064205  
1052023,0.352038754686777,0.497106868401129,0.528211406303244  
"Trappc10",2406.167682534,0.0359626048427267,0.153618779246609,0.23410  
2920353212,0.81490507880934,0.88218417781492,0.00450807170157208  
"Ccm2",1656.86136234056,-0.466847319891991,0.148454847499436,-3.144709  
16750471,0.00166252015810729,0.00871627266544124,-2.21405309630447  
"Tbrg4",1677.28236977523,0.0678686238832798,0.166697392365668,0.407136  
685944091,0.683907600238171,0.787458981306476,0.0162168002526567  
"Tmprss2",8673.12391957368,-0.12110479297101,0.310205548890464,-0.3904  
01762328798,0.69623948489878,0.797419964553361,-0.0274149530654486  
"Mx1",576.865580275499,-1.09196369761182,0.490558430729409,-2.22596051  
603514,0.0260168262543008,0.0705983245254027,-2.89452153392138  
"Fap",123.170125963902,-1.75519784799303,0.495485699888368,-3.54237841  
453037,0.000396536177331341,0.00287487747858919,-10.2709706202784  
"Gcg",0.347925958796048,-0.59079951739922,4.78471990595204,-0.12347630  
1437057,0.901729939384687,NA,NA  
"Ndufa9",10103.1804268579,0.651257167266767,0.38359999794465,1.6977507  
0582961,0.0895548231763917,0.181360608879652,1.11187046640747  
"Egfl6",645.790774096417,-0.0218704936881918,0.348500544374298,-0.0627  
5598142166,0.949960818474189,0.968944132591009,-0.000689977409067959  
"Lck",895.887055450477,-1.16067199643476,0.521433038083769,-2.22592722  
68212,0.0260190563154962,0.0705983245254027,-3.0766499791591  
"Tssk3",1.16463105007857,-2.59585487840236,1.56280971662927,-1.6610178

7746828,0.0967098562721466,NA,NA  
"Cttnbp2",1067.46269839506,0.819193834469551,0.434267058027706,1.88638  
262867566,0.059243411740069,0.132301917547574,1.65695773970903  
"Galnt1",6378.29435212564,0.260425804921388,0.156577219265323,1.663241  
98464715,0.0962640065707017,0.191604287476066,0.430307556763378  
"Myf5",0.0983679749722721,0.897902326501968,4.78471990596623,0.1876603  
73887789,0.851142895370425,NA,NA  
"Mkrn2",1140.45359415393,-0.418839713258024,0.252612294585485,-1.65803  
376255025,0.0973106518839586,0.193174820854554,-0.688639374172507  
"Pparg",1083.69150316011,-3.22157250260131,0.765207417781482,-4.210064  
39266025,2.55297913955808e-05,0.000346505365622777,-25.6682405496855  
"Raf1",5057.97084454449,0.277768332371949,0.137582790963872,2.01891770  
348581,0.0434957738567925,0.10461090399158,0.627064090293122  
"Sept1",941.463176508939,-0.189643594371988,0.287202920290718,-0.66031  
2207758972,0.509053497648301,0.643386601228143,-0.0836346247110744  
"Pdgb",3887.81271234643,-0.799693900012487,0.256102969557893,-3.12254  
833043517,0.00179292665286437,0.00918515849937256,-3.75069738346163  
"Acvrl1",2054.77761255546,-0.91912530867463,0.168401571514658,-5.45793  
783518599,4.81696233612982e-08,2.64566567971434e-06,-11.8039475214158  
"Grasp",710.55257702956,-0.0086408797853068,0.183358910951167,-0.04712  
54968764952,0.962413206339977,0.977401567645027,-0.000197510553657702  
"Acvrlb",2427.00728218392,0.196709996282547,0.13728335760947,1.4328757  
6664702,0.151893343789468,0.27071448054909,0.257039101261614  
"Tom1l2",4977.21390407285,0.39425065596951,0.125042169125494,3.1529415  
9343824,0.00161634143278218,0.00852459433497079,1.87852546338446  
"Gpa33",242.488838730676,-4.11137251254171,1.15615615759771,-3.5560702  
4667363,0.000376443462650573,0.00275418185169263,-24.2350396897056  
"Zfp385a",739.687398501864,-1.27330845272708,0.205477915233185,-6.1968  
1415047487,5.76174664683532e-10,1.03031818478804e-07,-20.4852766752544  
"Itga5",1475.63812921336,-0.898124308627381,0.23163540730687,-3.877318  
75307624,0.000105613951264373,0.0010342038328554,-6.17381731877171  
"Gabra2",155.965278454582,0.555819459345041,0.433179082900012,1.283117  
03239221,0.199451077399064,0.330885485163529,0.614726834052118  
"Wdr77",1868.3507809085,-0.486074541905496,0.161157044895931,-3.016154  
47354091,0.0025600280332564,0.012045228424815,-2.14800553304323  
"Adora3",58.1449293751973,-1.28656379478384,0.48203867980022,-2.669005  
30745179,0.00760762480954118,0.0274133188941848,-4.62741782788789  
"Atp5pb",18553.0823428912,0.750142785575678,0.405579156917619,1.849559  
50714215,0.0643770635897064,0.140704403752056,1.47110052829371  
"Sox9",965.155782808098,-1.19511677221095,0.404257984273317,-2.9563219  
9908002,0.00311331876878693,0.0139038813552843,-5.10982602591459  
"Hnrnpd",5038.18066056903,-0.127162271341342,0.107163571519374,-1.1866  
1845194616,0.235378154268205,0.373243595634471,-0.125321470440083  
"Dynlt1c",694.341487419074,-0.263894629194679,0.161421505393654,-1.634  
81704963119,0.102087405526726,0.200493577050775,-0.4240715617495  
"C1d",2833.40203798203,0.209971030529733,0.261085649155662,0.804222795  
12018,0.421268316242766,0.564334567509547,0.120126106031177  
"Gm2a",10390.3589926822,0.0871213816303156,0.243391054120008,0.3579481  
66769346,0.720382103738685,0.815112015941091,0.0178102007254395  
"Krit1",2983.42185507163,0.171222648884748,0.173195892236278,0.9886068

69793205,0.322855523749834,0.467997695492846,0.130007971633906  
"Clcn4",7086.99218622655,0.313419539300713,0.145639433968013,2.1520238  
7678566,0.0313954738644381,0.0814027858256402,0.78616457960726  
"Vmn2r88",10.8067639058463,1.63862966896021,0.571652838838066,2.866476  
92031211,0.00415068423153827,0.0172475467431484,6.65297633499011  
"Grm6",2.07108040914748,-3.87790324472109,2.46624860558016,-1.57238943  
225225,0.115860263586862,0.220372980140146,-5.86507195543065  
"Sema4f",75.0664377332502,-1.7277170184952,0.389633427207674,-4.434211  
48661953,9.24098797780817e-06,0.000160732188752278,-15.0929402296671  
"Hk2",2764.46357715153,-2.43884514055359,0.802127863783798,-3.04046929  
506858,0.00236209775158254,0.0113410938094943,-10.9243739839711  
"Myo18a",9015.8919013267,0.313555217271815,0.175629619650258,1.7853208  
2399436,0.0742092930203953,0.157019294119552,0.580511924074978  
"Sez6",12.9656243065672,-3.356537141052,1.08246903681306,-3.1008158449  
8167,0.00192988272613629,0.00971819560800759,-15.5533718166019  
"Haao",5051.2808454667,2.07945881587368,0.730285688647589,2.8474593548  
7879,0.00440697213426528,0.0180291948539455,8.3506135621058  
"Cd52",2774.91199693763,-1.55532987717544,0.472043312703101,-3.2948880  
6497232,0.000984608912992978,0.00580347780699428,-8.00885690026443  
"Abhd15",149.298848524204,-2.05517895729648,0.531068229121218,-3.86989  
626680789,0.000108881671551922,0.00106042698897072,-14.0760925576294  
"Hoxb6",4281.83580414695,0.398280890696409,0.326271550322423,1.2207037  
0616999,0.222198224017164,0.358021731417789,0.40909883380643  
"Loxl3",756.227869010941,-1.02710102240916,0.331042708495074,-3.102623  
90939941,0.001918132307214,0.00966901337281762,-4.76454601322166  
"Btn1a1",0.186490667865646,0.895501585821939,4.78471990596623,0.187158  
622327152,0.851536266129833,NA,NA  
"Kat2b",2861.11732997819,-0.0879026884823841,0.217560708209084,-0.4040  
37517647286,0.686185130525489,0.789382127263318,-0.0207894039723735  
"Rab5b",4947.78591578389,-0.120487058712475,0.184573938183215,-0.65278  
4785861127,0.513895033259919,0.647700411021454,-0.0523307849431582  
"Dnmt3l",104.153058333975,-2.81465091096293,0.765573359712679,-3.67652  
671720353,0.000236431103523312,0.00192642442812267,-17.5974497505996  
"Aire",20.4253345418433,-1.96235110538171,0.629592744927788,-3.1168578  
7549343,0.00182789670992044,0.00931704778119934,-9.17577610169149  
"Icosl",1905.84469026996,-0.864430884791239,0.169945345255555,-5.08652  
28670509,3.64687767596144e-07,1.24452665318564e-05,-9.76302954380248  
"Spq7",4024.9324702297,0.823453721313967,0.187074175679522,4.401749831  
70649,1.07381327799037e-05,0.000180961203926156,7.09588837559059  
"Sult5a1",680.723612093953,-0.824652413391311,0.394698597771952,-2.089  
32187255395,0.0366787587663693,0.0917370979391868,-1.9699531249072  
"Rpl13",24673.5041541236,-0.337480042519338,0.181545181038484,-1.85893  
142736628,0.0630368587703868,0.138570739138956,-0.666986893542913  
"Chmp1a",4374.70989280986,0.0179269202328803,0.119001491987434,0.15064  
4499774619,0.88025615619302,0.925249003311348,0.00139278518728066  
"Rpa1",2187.59537461526,-0.468528471648509,0.287811818776439,-1.627898  
65141863,0.103546377431746,0.202603840156969,-0.748006985460754  
"Serpinf1",764.786461559001,-2.30360796936184,0.383720377899928,-6.003  
35062205794,1.9328659335481e-09,2.50697739369696e-07,-35.0125786436496  
"Tubgcp3",2552.06771071473,0.266921035344853,0.181968790859711,1.46685

062907648,0.14241669345933,0.257591900655846,0.36204601407709  
"Polr3d",932.621618663783,-0.0466030610890037,0.131872114691099,-0.353  
395872949849,0.723791679394151,0.817925707941762,-0.00936645882224342  
"Tcf7",463.709948964805,-1.66457578670866,0.396148783691485,-4.2018954  
8784531,2.64689335272928e-05,0.00035460820897817,-13.2242173681248  
"Ddx3x",9345.89113139302,-0.491267296146387,0.178095704356785,-2.75844  
55106352,0.00580769866461278,0.0222516228262173,-1.86943925828451  
"Il12rb1",81.4702187578055,-1.34950960209105,0.522480985615049,-2.5828  
8749111597,0.00979772683421214,0.0332467939111501,-4.59345665444113  
"Slc5a5",22.095445050554,-0.894349177746159,0.475068711247313,-1.88256  
805083628,0.0597589295339545,0.133163383777491,-1.80316754362646  
"Kcnn3",93.0099389773433,-0.582471877211722,0.348410073109087,-1.67179  
976174039,0.0945638138314576,0.18921382494549,-0.969744354495799  
"Usp32",1971.43044879878,0.0513545944999302,0.158349264996414,0.324312  
174742921,0.745701703278409,0.834750936417638,0.00927576332124447  
"Car4",4756.48999164366,1.83136214696052,0.552854604928248,3.312556557  
61102,0.00092447431772232,0.00553265814823505,9.51774822520531  
"Txnrd3",973.968527741737,0.302515386594053,0.157351199402568,1.922548  
97161665,0.0545367177675258,0.124122437613076,0.631194361055617  
"Fasl",45.2395501922457,-0.343230008258306,0.442774466651034,-0.775180  
219524304,0.438233174814121,0.580362048667101,-0.186752528100599  
"Zfp512b",3127.06167664411,0.0976129028766363,0.169396450967222,0.5762  
39362272853,0.564453402805635,0.69222670909518,0.0359061022582527  
"Dnajc5",5550.41654091996,-0.0213299857279327,0.12934737639561,-0.1649  
04664650442,0.869019020808784,0.9178836873093,-0.00182765126666029  
"Tpd52l2",3245.89486965746,-0.158161744970349,0.119763642707181,-1.320  
61568431958,0.186629540469452,0.315356857619671,-0.182526625055642  
"Fmr1",2321.95556974363,-0.173742267311008,0.103462472110667,-1.679278  
13599087,0.0930978500511321,0.186841921725811,-0.291451325674447  
"Bcl11a",104.486330080205,-1.20916492950178,0.494703823767505,-2.44421  
989766153,0.0145165755054728,0.0451795319765662,-3.74491815763529  
"Il4",1.21821802328777,0.819097540275203,1.59931944211602,0.5121538066  
16316,0.608543369456985,NA,NA  
"Pxmp4",4732.18191308243,1.3102530913756,0.341339980262888,3.838557353  
77523,0.000123759308514734,0.00117366682753905,8.8410930964688  
"Dlg3",1228.17646785754,0.0518791781819874,0.146851359916614,0.3532767  
97786863,0.723880938217725,0.817960092462874,0.0104246918298964  
"Gnb1l",237.046910723533,0.361176117748386,0.248605778361301,1.4528066  
0863597,0.146277456559384,0.2629407069231,0.482468709141579  
"Dbh",11.1368597916436,-0.652204723857303,2.82382462652228,-0.23096502  
4432319,NA,NA,NA  
"Mmp11",1208.17584973949,-0.415424471489009,0.363425337857154,-1.14308  
065017826,0.253005107348233,0.393357274784774,-0.387606395935483  
"Smarb1",3090.61004023555,-0.204735046742042,0.083310972653822,-2.457  
47997196922,0.0139915612093904,0.043944771345058,-0.639760502516738  
"Vpreb3",10.0511757072653,-0.900541999314855,0.836253463902363,-1.0768  
7685395345,0.281535284852128,0.425466980626785,-0.769574317029749  
"Hip1r",4823.56767338792,-0.275838143283694,0.151249829202702,-1.82372  
532080034,0.0681936088413768,0.147132785790546,-0.528621678071112  
"Nsun5",808.822785019863,0.154933311226495,0.208589023161187,0.7427682

86070214,0.457621979138212,0.597444061650789,0.0798053151067688  
"Top1mt",1201.52495076398,0.457088608796092,0.148257803664665,3.083066  
1017342,0.00204879640614268,0.0101776897648331,2.09692015305508  
"Hoxa10",1931.75580459621,-0.04246310671731,0.182555176154454,-0.23260  
4232932751,0.816068740059785,0.882553161880229,-0.00530518139721126  
"Hoxa4",122.412126281276,0.235141832578588,0.176355872851396,1.3333371  
2553325,0.182421195536899,0.310451991845897,0.275051516476621  
"Gm38393",81.7637428599818,0.0824122987184885,0.337597584324789,0.2441  
14005979388,0.807142525434427,0.877166132549578,0.0108008628898811  
"Mmp14",4584.78648978734,-1.37585206612278,0.281117462297692,-4.894224  
8371103,9.8693956371029e-07,2.75589540336503e-05,-14.4453227124081  
"Slc7a7",3413.24169902484,1.54753712865381,0.408733735813872,3.7861742  
0843021,0.000152984442392942,0.00138032885598222,10.1912028600011  
"Oxa1l",2751.00872781474,0.295785978953865,0.149737335778485,1.9753655  
7877215,0.0482266760753123,0.113278367680573,0.644194371439946  
"Heatr6",1053.80967946087,0.168856148422899,0.207446824752051,0.813973  
164567463,0.415660324456282,0.558972688202537,0.098215966500599  
"Ccl3",41.976155756262,-0.904004362780091,0.562642064131751,-1.6067130  
7818963,0.108117323374665,0.209009673920208,-1.41510559560138  
"Wfdc18",31.0974115561494,-2.06988286008994,0.827217266460537,-2.50222  
395495499,0.0123415827493318,0.0397493998767156,-6.67570451333931  
"Icam4",14.3937273423548,0.286572645814346,0.432965726355989,0.6618829  
81422699,0.508046219437822,0.642655065952942,0.126707276765168  
"Ilf2",3310.20660097119,-0.00308350984014851,0.122948996914996,-0.0250  
795851736827,0.979991483731973,0.987078931181217,-4.0101884014707e-05  
"Chtop",6413.87896957186,-0.192167271149622,0.0813632699486267,-2.3618  
430192267,0.0181843404712281,0.0534295163514174,-0.562933256209399  
"Snapin",1849.78042485094,-0.380939511522025,0.161323349089267,-2.3613  
4145288067,0.0182089562006124,0.0534535121950526,-1.11575009045979  
"S100a4",1068.28395810464,-1.16043205975441,0.424026587260182,-2.73669  
645871138,0.00620595267041274,0.0234821783752586,-4.35337655256262  
"S100a3",18.3462434429296,-1.69984341617343,0.539741027621554,-3.14936  
854747551,0.00163623702041804,0.00860856703294952,-8.08275103271808  
"S100a5",9.44328753301004,-3.49648949477938,1.40159899562363,-2.494643  
26508286,0.0126083817141992,0.0403807862456399,-11.2216375632767  
"S100a6",12719.2056180976,-1.66833235585261,0.461772932435162,-3.61288  
468567149,0.000302809390109121,0.00232265046748531,-10.1185129862277  
"Scn4a",12.3942116711062,-0.21085896239773,0.509061885339784,-0.414210  
862117457,0.678719687562422,0.783570906194209,-0.0514271771541834  
"Icam2",679.048066967263,-0.634152528692341,0.209114064581721,-3.03256  
75604881,0.00242482811111657,0.0115597306871762,-2.82846468272127  
"Mapk7",1101.61089029212,-0.446639075271495,0.141645454508909,-3.15321  
855417113,0.00161480858479041,0.00852111983389536,-2.12832787613383  
"Epn2",2268.75693184136,-0.401812654192615,0.107646596888865,-3.732701  
87637653,0.000189436760087318,0.00162429109418756,-2.58071562797893  
"B9d1",539.542332117059,0.574551776270262,0.292995732586996,1.96095612  
450487,0.0498841413235174,0.116177853263968,1.2367991392384  
"Sec24b",2718.04338613845,-0.378073441653981,0.14632249093977,-2.58383  
683346128,0.00977080067416747,0.033166969280104,-1.28779405923305  
"N4bp3",1029.28800820778,-0.170180489642998,0.166178535049127,-1.02408

225943675,0.305796423021364,0.450367751043928,-0.135751411850411  
"Rmnd5b",1858.96219223906,0.339901822491627,0.17878619978271,1.9011636  
4073251,0.0572805818832266,0.12907162666811,0.695910838864583  
"Nh p2",2858.62486296234,0.760522937982889,0.271691131353524,2.79921885  
633175,0.0051226404029331,0.0202434622165362,2.96598119527896  
"Vps9d1",1869.47839622225,0.17074179193854,0.187062390183393,0.9127531  
8235348,0.361372366438189,0.506253657192974,0.116226914912262  
"Zfp276",2267.15915097122,0.341649575370551,0.198549417149012,1.720728  
17073113,0.0853001619727631,0.174722403418945,0.596027100414465  
"C1ql4",25.3043882020659,2.71338632644731,0.571420829484243,4.74849040  
574243,2.04940608302667e-06,4.84943201539489e-05,26.9549530901953  
"Mfsd10",1471.7332311885,-0.0658022293296196,0.239075775124902,-0.2752  
35871535885,0.783135029314093,0.859821318856139,-0.00993815544731669  
"Luzp1",2763.92246888364,-0.210833849408941,0.206107550925334,-1.02293  
122431657,0.306340364979009,0.450760277440248,-0.167996547010968  
"Slc13a2",1218.04530314303,2.05783313307384,0.598835937829687,3.436388  
83887276,0.000589524216039322,0.00390970855929752,11.4092286928275  
"Kctd10",3552.09818749627,-1.06671116164101,0.150344273677879,-7.09512  
33162794,1.29236195942449e-12,8.99945481602099e-10,-22.2181928310232  
"Poldip2",3703.45258729168,0.185541310866728,0.278823917896957,0.66544  
259282411,0.505767449978533,0.640562113652578,0.0826418041549994  
"If t20",2968.29399951477,0.44337594417954,0.159956118235623,2.77185986  
425618,0.00557370258472868,0.0215303185579815,1.70180685904507  
"Col6a1",3993.24749026653,-1.78184282837884,0.303761633281449,-5.86592  
457095423,4.46636818141209e-09,4.48564132124303e-07,-26.045578245388  
"Pcbp3",1074.43730238531,0.50588120612412,0.149547362536214,3.38274910  
065109,0.000717641624590269,0.00455784247435214,2.72715798335268  
"Lgals9",1525.88943516462,-1.2850425146553,0.233591311481453,-5.501242  
77527903,3.77123499471165e-08,2.16994144780817e-06,-16.7579957553162  
"Araf",5715.84752675683,0.0927295966504538,0.112541646904712,0.8239580  
56424813,0.409963390771012,0.553513680875572,0.054846664192812  
"Cfp",1533.13144371843,-0.921497847109572,0.302695057582249,-3.0443108  
4692944,0.00233214034038357,0.0112443304542035,-4.13558211294672  
"Timp1",1102.19386474181,-1.61128757871914,0.553643300115741,-2.910335  
18943027,0.00361041325463203,0.0155639702937907,-6.70746250669791  
"Uxt",617.869889993146,0.402162252033266,0.213128840053121,1.886944309  
99122,0.0591678164642066,0.132148234297721,0.813908432441443  
"Cnm3",1438.53469974037,0.168374029038452,0.0955846443282845,1.761517  
55568785,0.0781508442878525,0.163389737169669,0.305029237629648  
"Lman2l",2302.43508254467,0.215568591175698,0.191848666140038,1.123638  
72792499,0.261166319541355,0.402674434478676,0.196086988987422  
"Mcm3ap",1772.32949940005,0.482863561455257,0.23159120601806,2.0849822  
8303886,0.0370709087679843,0.0924899013638078,1.14953194536683  
"Pcnt",1817.83320244949,0.00581719340522996,0.198793342164803,0.029262  
516248695,0.976655221791381,0.98525471005355,8.64148870895199e-05  
"Ftcd",989.199226756608,2.01021268051152,0.835448628031915,2.406147563  
19251,0.016121751261634,0.0488108549843695,6.07044538398702  
"Mxd1",1072.01686397006,0.0560182628462827,0.130058126940679,0.4307171  
27518168,0.666674063594731,0.77429180914761,0.01432983362844  
"Gmcl1",1601.53047792275,0.292636878554235,0.122907920379721,2.3809440



2419421,0.0172683357279389,0.0514121255189118,0.868511498863534  
"Snrnp27",2469.64282035595,0.609530962399967,0.189191774266444,3.22176  
249344514,0.00127404698852644,0.00707181383926476,3.01817684481829  
"Oas1c",248.300271154822,-0.00228695051620246,0.161339629677743,-0.014  
1747599196203,0.988690556631074,0.992458878882467,-1.73115273455919e-0  
5  
"Ocrl",1694.0665233435,0.0429279263876031,0.188566542976918,0.22765399  
2643105,0.819915241794421,0.884533551143454,0.00526703479240913  
"Calm1",18110.2427602744,-0.437486809166624,0.174247182135676,-2.51072  
530301224,0.0120483410895286,0.0390879458508533,-1.4183064891239  
"Agpat3",11905.2559705021,0.425751940326123,0.365824950655643,1.163813  
29256814,0.244499684071207,0.383620732278136,0.407913313297835  
"Slc26a3",42.0164670300753,-2.51063233668783,0.907552829719152,-2.7663  
7596674649,0.00566831430291013,0.0218296615189979,-9.60187725334021  
"Sema6b",543.764043861513,-0.640930748057531,0.230431095317734,-2.7814  
4209302036,0.00541179843685539,0.0211029881450346,-2.47292914642545  
"Uhrf1",482.633202214672,-1.05524336487172,0.405157518177612,-2.604526  
18432994,0.00920013907888601,0.0317157552616901,-3.64158334220371  
"Dpp9",2045.16577635707,-0.0597626871090272,0.159681481861066,-0.37426  
1851859722,0.708209510882422,0.806418509783654,-0.0128580872548958  
"Ramp2",1619.65030742146,-0.423879018727231,0.174736066404551,-2.42582  
443023446,0.0152736572675276,0.046765981375982,-1.29817155808365  
"Lsr",2778.69896217204,0.146591894986226,0.242209552892811,0.605227552  
899616,0.545027810823476,0.67502713939123,0.0576109639719267  
"Gramd1a",5243.358286677,-0.177297372453652,0.224046064919412,-0.79134  
3389661516,0.428743635011356,0.571404196544867,-0.0992259717507951  
"Hpn",10692.2390363735,1.8961905626603,0.562161571708867,3.37303483213  
239,0.000743445471240282,0.00468056176888699,10.1718054601173  
"Gabrg1",14.1253195890252,2.80150168235951,0.661826192675027,4.2329870  
1889714,2.30607820546048e-05,0.000320941562098989,22.5359841132152  
"Ckb",6535.92529796126,-0.0764062322052544,0.189473776805339,-0.403254  
917348021,0.686760703247706,0.789805024885296,-0.0180295150377459  
"Sp1",2984.92740529005,-0.429224228940702,0.154280938485598,-2.7820950  
0897461,0.00540092264873426,0.0210701770453112,-1.65676116273519  
"Itgb7",1253.05350775374,-0.949242255059971,0.512439016837201,-1.85240  
042984771,0.063968343634244,0.139983699683557,-1.86642792898556  
"Myg1",2068.19691639041,0.4995473830335,0.182233828937123,2.7412439608  
3376,0.00612070432375791,0.0232136730022625,1.87980370628206  
"Rarg",2581.44631592321,-0.996141786833678,0.1785564231369,-5.57886280  
052739,2.42096093860405e-08,1.58402336848663e-06,-13.3040139818858  
"Pfdn5",8556.39475790493,0.554437626250603,0.133707524973227,4.1466448  
9797132,3.37382698944347e-05,0.000426331034609001,4.30259922660925  
"Efnb2",2184.14545004103,-0.914678076755601,0.152932652300699,-5.98092  
077130229,2.21879782981533e-09,2.73810886618604e-07,-13.8215432429347  
"Rrp15",463.338711371809,-0.461453915856861,0.189794210167974,-2.43133  
82133652,0.0150431649588933,0.0462782629170876,-1.41808614329403  
"Rnd2",533.598567189821,0.224432826063579,0.175637897130176,1.27781549  
27307,0.201314490398389,0.333126532613748,0.246703942513586  
"Srr",2831.70510351417,0.894799259129837,0.280302210620083,3.192266151  
41696,0.00141161195721436,0.00767315582430043,4.35769681806752

"Sync",89.4240174770499,-1.13940403300232,0.479575494876364,-2.37585957826319,0.0175081242652609,0.0519041214724126,-3.37076398819912  
"Fndc5",285.034629097389,-0.310880242003483,0.329439480643309,-0.943664194092387,0.345341276812678,0.489991574391907,-0.221771731445082  
"Acp5",4094.10762982287,-0.694401686173877,0.492721910488139,-1.40931765239734,0.158741261404568,0.279760113951345,-0.884544685561019  
"Cnn1",620.560751558695,-2.58027595768542,0.597571630549742,-4.31793583525989,1.57495198231051e-05,0.000240284927629815,-21.5032074065074  
"Fbxo9",1549.83824199307,-0.0442454120628994,0.13695804929803,-0.323058135609237,0.746651214621576,0.835286326392306,-0.00796332054684393  
"Vps50",1674.02490289988,0.469062859517617,0.122623357052385,3.82523257226788,0.000130648689379025,0.00122487520347775,3.14502721948726  
"Hars",2362.33131432386,-0.0866029204582806,0.158475902256991,-0.546473749162454,0.584740327560085,0.708681433787079,-0.0298216438722337  
"Zmat2",4452.03608913633,0.328007877275191,0.103468953094095,3.17010917252541,0.00152381672864616,0.00814903416762009,1.57767061253818  
"Ube2c",232.038259392124,-0.595366110645377,0.415456555764304,-1.43304059686842,0.151846235920513,0.270680006214861,-0.778035117032579  
"Smg5",4044.8745358234,0.012095194712645,0.202539947207589,0.0597175761098047,0.952380573006062,0.970244861929682,0.000365357180405199  
"Cct3",6359.19759113156,0.261618711938604,0.158017698835755,1.65562917234058,0.0977969386916178,0.19397296989317,0.429064226216849  
"GlmP",5760.95917008629,0.830197743596968,0.152684628939298,5.43733674675939,5.40828647118984e-08,2.89699916525438e-06,10.5865447494204  
"Mef2d",4025.73790798407,-0.477107635889017,0.178690436090239,-2.67002334499915,0.00758459734479712,0.0273657437137036,-1.71685430702015  
"Tmem79",751.027874674376,-1.91779324426575,0.521184668325098,-3.67968085175807,0.000233526027545407,0.00190993728401021,-12.0066991540302  
"Snd1",3827.36526406118,-0.664797927437427,0.250685859888928,-2.65191633757078,0.0080036370841103,0.0285171949891639,-2.36485112482928  
"Col18a1",13911.0050255341,-0.672940087876277,0.326188268932293,-2.06304196677275,0.0391086410994,0.0963170272018828,-1.57475393783152  
"Slc19a1",2219.09782462406,1.26384652852306,0.297559833499295,4.24736939008286,2.16295181668188e-05,0.000305381857506614,10.2295075417036  
"Kpnbl",7614.21252814498,-0.509929278651929,0.138787881199713,-3.67416286093562,0.000238630496662756,0.00193948204415607,-3.18467882937954  
"Npepps",7285.33534278976,0.518098581149413,0.2526442372955,2.05070413121448,0.0402957684184264,0.0984200040864935,1.20121736414731  
"Tbx21",108.630294536965,-1.70117466611229,0.359337378298908,-4.7341990253438,2.19921846555656e-06,5.1538896203632e-05,-16.7959930904142  
"Mrpl10",3056.80119790014,0.445343379152969,0.191386875103488,2.32692748085343,0.0199691252952422,0.057393110326336,1.27271611994051  
"Cyp51",7764.97015321947,0.634245842597055,0.398571135757605,1.59129898202859,0.111542305808681,0.214102370413237,0.97756375900345  
"Tcf25",14170.0466153477,0.00199520855328345,0.143154887639007,0.0139374113325055,0.988879914696821,0.992596168687702,1.48271443824898e-05  
"Tubb6",838.797094869698,-1.73367637566186,0.275895686007239,-6.28381110539137,3.30372092820629e-10,6.54259992164739e-08,-28.6790746592367  
"Def8",4897.66197742964,1.31263000439881,0.236518822101557,5.54979089078664,2.86011488645919e-08,1.77036571606925e-06,17.3848976131166

"Meox1",417.598802308209,-0.594849707261567,0.158830417186473,-3.74518  
758937207,0.000180259034587664,0.00156069744955163,-3.84428908714987  
"Sost",19.9855381284495,-0.132189239516528,0.405569264387649,-0.325935  
05258865,0.744473494428669,0.833806892663001,-0.0240258499388718  
"Nkx2-1",8.09128512495222,1.11532390866868,0.633258168333181,1.7612467  
7807845,0.0781966437771029,0.163435501683454,2.02022729723214  
"Pax9",4.26723890429503,-0.986252375307709,0.867612957501368,-1.136742  
33052951,0.255646017835639,0.396451607075422,-0.912481975430287  
"Irx2",1185.61447463097,1.56231164050899,0.575137380130126,2.716414711  
48252,0.00659931960423708,0.0246029701039033,5.78818981697556  
"Col1a1",16411.4105119455,-1.94187037127631,0.425351965399995,-4.56532  
596352342,4.98718797528734e-06,9.92246848389312e-05,-17.9004013607781  
"Itga3",4915.67420730406,-0.455191642804099,0.296243360610523,-1.53654  
631066162,0.124404448795687,0.232764412495759,-0.663545804320169  
"Sgca",27.5220731735356,-1.48343170900213,0.565763403551283,-2.6220001  
1469577,0.0087415401579721,0.0304797120887232,-5.17820615729548  
"Dlx3",3.30603040868842,-1.78143305894205,1.62039673990267,-1.09938079  
673565,0.271602003334725,0.41412809043458,-1.57047567740784  
"Foxm1",264.411424808933,-0.265098531446807,0.399930896442467,-0.66286  
0843723143,0.507419681572017,0.642070799616535,-0.117453680940768  
"Itfg2",1041.03803588602,0.423027330484469,0.268994134748811,1.5726265  
9603897,0.115805305605987,0.220332928249955,0.639877725062295  
"Nrip2",449.338420965807,-0.134182943577138,0.298972910990045,-0.44881  
3048422324,0.653566525077716,0.764029024879508,-0.0361152721531617  
"Tulp3",2194.3462396646,0.812202078443623,0.209531691556311,3.87627319  
004078,0.00010606858943448,0.00103717420099975,5.58084789977851  
"Gtf2h4",798.306751189549,0.309354186744487,0.211524798290564,1.462496  
07253868,0.143605319814231,0.259284797271773,0.417575010635794  
"Tubb5",8678.07666145165,-1.07464642752266,0.204672919245362,-5.250555  
03915678,1.51641584816045e-07,6.30993576912789e-06,-12.8671554808151  
"Ell2",1785.97735949917,-0.186302365471846,0.299831118650111,-0.621357  
670646762,0.534364316505377,0.66647703212575,-0.0755921103407264  
"Jup",7429.27231723551,0.104102192987534,0.119231202829514,0.873111991  
802913,0.382602038235791,0.527429638902544,0.0665983170057918  
"Fkbp10",1071.39425254778,-1.31322133635843,0.251852951773161,-5.21423  
84161581,1.84573955221553e-07,7.2304801684033e-06,-15.5448703141765  
"Klhl10",15.6382803916264,-1.00744401182332,0.473470853520599,-2.12778  
464467716,0.0333549430717318,0.0852365242480507,-2.48065482691388  
"Nom1",1755.84137447102,-0.292356762246741,0.15150920211123,-1.9296303  
9982289,0.0536526493447071,0.122640018396612,-0.613511219419413  
"Ergic1",3769.0650404124,-0.472232170292089,0.281630305563674,-1.67678  
037825841,0.093585436071477,0.187497824961124,-0.790511002266223  
"Tnk1",776.050745746607,0.0655181924660997,0.219804700861182,0.2980745  
73516413,0.765646247368693,0.84835884134766,0.0107745696625342  
"Acap1",688.672497543357,-0.893335710273714,0.405992570765141,-2.20037  
452554887,0.027780333689097,0.0741290469782418,-2.32441290966682  
"Tcea3",1959.97969627843,2.22602282564834,0.493156796333024,4.51382368  
082611,6.36691558160217e-06,0.000119482309923079,20.106199976759  
"Csn3",7.39322482437066,-0.53963564655123,0.920583964382192,-0.5861884  
05870596,0.557748912126612,0.686782595104151,-0.202761344588071

"Ifrd1",2165.0935638099,-0.78637452250791,0.293319780793309,-2.6809461  
0046786,0.00734143396576496,0.026695874573757,-2.84922852865304  
"Stk38l",1151.0218745765,-0.150221221458198,0.126315999033817,-1.18924  
93635583,0.234341554722973,0.372114311750836,-0.148501816736707  
"Brpf1",2102.32755742913,0.000793467703015886,0.164521005855464,0.0048  
2289601191089,0.996151900651752,0.997430789241917,2.04120903113396e-06  
"Akr1b3",7730.09915487297,-1.28674408072251,0.511025438493211,-2.51796  
482875012,0.0118035106979639,0.0385375074765853,-4.18979737177725  
"Hoxc13",1.20222737581642,-1.07281190395929,2.17887322916254,-0.492370  
042277142,0.622457773299917,NA,NA  
"Hoxc11",109.539970516601,-1.05447334316227,0.506540952120783,-2.08171  
390436924,0.0373686098240993,0.0930184034661418,-2.504329816373  
"Hoxc8",1923.03632365839,-0.423381721528558,0.257742685529039,-1.64265  
271256692,0.100454807808882,0.198008330262216,-0.685643910400889  
"Hoxc6",1689.48017292182,-0.365307711823718,0.209239873319877,-1.74588  
000856439,0.0808318043796989,0.167576663667769,-0.652554403737012  
"Gstt1",3768.14034452949,0.823264336975059,0.22642743062186,3.63588605  
282517,0.000277026774761433,0.0021692642788347,5.04938249033017  
"Gstt3",1954.82908823293,0.472291475488641,0.262438730610204,1.7996256  
6649558,0.0719197655210918,0.153122034082796,0.886264431286955  
"Ddt",3819.3167094406,0.663440888038373,0.483458008699542,1.3722823411  
7575,0.169975560722829,0.294412485406923,0.811237925667762  
"Tat",8.54718548236804,0.882744684866886,1.00275085953013,0.8803230398  
43136,0.378684334718215,0.523505611815485,0.571319006167595  
"Marveld3",784.722045637748,0.678748714434433,0.217375640765828,3.1224  
6906802969,0.00179340949877482,0.00918515849937256,3.18344434941597  
"Ddx18",2305.33825221798,0.147437376824791,0.290896062800383,0.5068386  
81161402,0.612268013096429,0.73173191136267,0.0460507485384132  
"Ubl3",5277.06009894882,-0.192559148596935,0.156584229774146,-1.229748  
03321305,0.218791473686425,0.354259430217546,-0.199823592776456  
"Gramd3",1296.14029197691,0.287204503946884,0.147596669307048,1.945873  
88248855,0.0516698909286641,0.119240091528831,0.610773763032941  
"Eef1e1",767.537448246654,-0.0263181558435461,0.21148246385989,-0.1244  
46043247265,0.900962119420778,0.939378270034268,-0.00164585949645934  
"Akt1",5179.97297508702,-0.491300827632412,0.104712722961949,-4.691892  
3864767,2.70689507967775e-06,6.07868198490612e-05,-4.76961602354429  
"Clnd15",849.729951890923,-0.777691031732352,0.278706549756877,-2.7903  
5793170542,0.00526498007285724,0.0207052403107242,-3.01539467467448  
"Il16",724.854541024213,-1.01713270900996,0.295259578485561,-3.4448762  
4830669,0.000571320893610247,0.00382148020021015,-5.66249724765136  
"Tcirg1",6094.18714850258,-0.444815717955255,0.301802707024202,-1.4738  
6258506815,0.140518593351437,0.255010380972293,-0.607818893716968  
"Naglu",1728.00255238362,0.344018983919519,0.127075568326978,2.7072000  
4205941,0.00678533575426982,0.0251809053172351,1.26656413074712  
"Coasy",6164.0657761175,0.627121085522205,0.430740071641887,1.45591535  
779747,0.145416019592097,0.261802543860269,0.840445546927212  
"Smo",2701.95729198841,0.0734901693849754,0.170949783171565,0.42989331  
7332968,0.667273246844626,0.774716532526774,0.0187589596109345  
"Tspan33",2152.58747820992,0.732948706311823,0.464427043538625,1.57817  
835224935,0.114524642001352,0.218504221385041,1.11477829440115

"Crnkl1",1239.56079387802,-0.116251391430517,0.0847102913671377,-1.37234082842047,0.169957361155947,0.294412485406923,-0.142149118844525  
"Rin2",3924.49587164456,-0.232798787997707,0.12163101279118,-1.9139755779012,0.0556232763422313,0.126094947345753,-0.482061130829861  
"Folh1",1699.86393419131,1.45584915765988,0.603710543369285,2.41150195843001,0.0158869665291511,0.0482048044483953,4.41456642983398  
"Chordc1",3616.72362876342,0.0490967502308793,0.189285980313018,0.259378693285626,0.795343067610921,0.868821734118311,0.00690385313696752  
"Rtcb",5433.43855054558,-0.26167750676573,0.20745768968131,-1.26135361464649,0.207181472474512,0.340293517842475,-0.282074416924355  
"Pwp1",784.020067876004,-0.408932730510094,0.121480531397297,-3.36624087667758,0.000762001366059801,0.0047681330665706,-2.18607277124384  
"Fbxo7",2569.21142137596,1.08384512012394,0.224116227132623,4.83608498139928,1.32421326462552e-06,3.42450882859351e-05,11.1440602039566  
"Capns1",12257.5489289093,-0.196086550261459,0.132831458445666,-1.47620565606954,0.139888691617366,0.254174793509961,-0.268586235458682  
"Lrp3",1036.28711977445,-0.0333830719391684,0.153405029499951,-0.217613933832457,0.827729927033207,0.890186327484472,-0.00388326853232774  
"Dsg4",0.0837058623428615,-0.544048378937457,4.78471990596623,-0.113705376621746,0.90947135024012,NA,NA  
"Evx2",0.580171029588956,0.801017442018288,1.94540961265277,0.411747447328595,0.680524544012272,NA,NA  
"Hoxd13",0.709405946815883,-3.11408841894463,4.72902282883555,-0.65850568535137,0.510213244983034,NA,NA  
"Hoxd12",0.212952144137468,-0.539944266952227,4.78471990596146,-0.112847622758333,0.910151361951238,NA,NA  
"Folr1",7404.08304283277,1.84734752898847,0.665674991086616,2.7751493652675,0.00551763606127046,0.0213825046630005,7.10338789190226  
"Clpb",2481.10523081061,0.402804932810123,0.360843997310515,1.11628553006938,0.264299933431795,0.406221039102407,0.362869980199186  
"Sept7",5375.12129924478,-0.511854066600727,0.126357325625938,-4.05084599618699,5.10327882492971e-05,0.000588068177193943,-3.80751229656027  
"Zdhhc4",1346.52222105745,0.110101975367218,0.109879677737389,1.00202310048961,0.316332436050339,0.461596305800741,0.0851159358967632  
"Rac1",11505.3760342588,-0.213547441813539,0.143244956833112,-1.49078506172007,0.136017934974236,0.248531318163964,-0.297297846929241  
"Nup214",1490.29678419714,0.495631715623904,0.211927075705346,2.33868991951272,0.019351487244592,0.0560230583957024,1.42840659770638  
"Aif1l",6886.90349282946,0.66645717880684,0.475545850975884,1.40145724631848,0.161077383861838,0.282715530699263,0.841944736876322  
"Cpa3",3.51264940624352,-2.2662747920958,1.29007371445392,-1.75670178122737,0.0789686537785688,0.164624271503746,-4.08856265651038  
"Ltbp1",1564.87801259584,-0.16627403550753,0.171100002872407,-0.971794463565992,0.331152810732664,0.475955882623137,-0.123446850906131  
"Ugp2",5322.70650172454,0.140292685041449,0.342225964086534,0.409941675278544,0.681848732932779,0.78601670774053,0.0337792841091865  
"Kcnh6",1.71273075447124,-1.09152020035399,2.07985453303944,-0.524806029948102,0.599718039290149,0.721497027832377,-0.356301686495272  
"Trmt1",2717.8278201142,0.535003661998455,0.23629780229854,2.26410765057615,0.0235674945528662,0.0653096942569335,1.459818908306

"Nacc1",3865.02543329007,-0.0814193910212388,0.0853493880154593,-0.953  
954010853497,0.340106921993704,0.484787247973772,-0.0589513150430036  
"Nfix",4097.47173859899,-0.689618815578165,0.279541276521422,-2.466965  
96710045,0.0136263307880683,0.0430261048916203,-2.1695051108561  
"Slc1a5",13165.4133855455,-1.70951320677273,0.499562416198413,-3.42202  
12556858,0.000621574541572496,0.00407925291537547,-9.40547056274967  
"Uba1",7296.23484205156,-0.165388437983845,0.134330176115653,-1.231208  
37600519,0.218244939498668,0.353668536431602,-0.171903939024763  
"Vwf",735.069387954568,-1.12118917071403,0.343391620037082,-3.26504522  
909718,0.00109446598713314,0.00630425341717043,-5.68053938511075  
"Siae",1087.8427527896,0.106655592742171,0.129156460316942,0.825785969  
052148,0.408925514727334,0.552662769614041,0.0632475433052309  
"Vsig2",841.408078843317,-2.48839807399098,0.557525814181399,-4.463287  
63744263,8.07115884273862e-06,0.00014371822384997,-22.016490035768  
"Esam",2533.82171836424,-0.517168607155751,0.218812234349976,-2.363526  
92385825,0.018101911281994,0.0532274266590738,-1.51694937887855  
"Spa17",517.316321593189,1.46620286596952,0.25001991115899,5.864344400  
30318,4.50910708259121e-09,4.48564132124303e-07,21.4318013132312  
"Fam50a",2188.10692031699,0.157457287334628,0.0696419154629613,2.26095  
572311435,0.0237619989894004,0.0657272600787811,0.42863676553338  
"Emd",1251.55065653473,-0.471271592043031,0.123793033418258,-3.8069314  
486442,0.000140701725490338,0.00129720639021244,-3.13279782281116  
"Taco1",418.697483372348,-0.122460415341922,0.296477815539635,-0.41305  
085548821,0.679569354433389,0.784328100419405,-0.0297490455001822  
"Grik3",10.4567392077301,-2.45588845824712,0.816612210491171,-3.007410  
89429702,0.00263483356214435,0.0122876278810099,-10.8038521301161  
"Gria3",889.118481794447,0.73400341546017,0.263344566435818,2.78723584  
615542,0.0053159774324701,0.0208427363720696,2.84114354927751  
"Npas1",0.589521515515549,-0.572067124206988,3.13121267767108,-0.18269  
826520774,0.855034777014864,NA,NA  
"Sipa1l2",881.695715056393,-0.691465536088126,0.173562893958096,-3.983  
94795292518,6.77797235871168e-05,0.000732983389074656,-4.9912661947544  
5  
"Ap4e1",509.451249011365,-0.0986737663288005,0.183392944904031,-0.5380  
45595922112,0.590545570473064,0.713853072541044,-0.0332607675066395  
"Blvra",2151.01281154853,0.898025137306752,0.208230873395165,4.3126416  
4945679,1.61315465301445e-05,0.000243553280906977,7.4717261410898  
"Pdzd4",419.456158048608,-1.10743202218024,0.199253753217614,-5.557897  
92812968,2.7304297155714e-08,1.73264480341006e-06,-14.6910398587612  
"SrpK3",131.117561003583,-0.46291989278411,0.382534465626033,-1.210139  
04466496,0.22622554311428,0.362384623697193,-0.469886436654573  
"Idh3g",9159.02062004321,0.121863418412351,0.392221109383704,0.3107008  
15169879,0.756028077491571,0.841767671021623,0.0209911234657382  
"Pnck",152.958114420038,-1.16758650172117,0.374320587552751,-3.1192152  
9444765,0.00181333410071322,0.0092610301077574,-5.46656993859749  
"Ssr4",3848.17165348212,0.201573245876779,0.157894667222771,1.27663112  
011493,0.201732509643425,0.333591762617886,0.221294628246447  
"Bcap31",9257.40861614053,-0.0333520175159508,0.301435824490825,-0.110  
643841263021,0.911898780597225,0.945755448089612,-0.00186008386975454  
"Fam98a",2321.16938238215,0.134003347585261,0.123812433708369,1.082309

29294949,0.279115118078773,0.422858319526023,0.115339106467302  
"Ltp2",1965.5614465793,-2.08011471284473,0.395445683109524,-5.2601780  
7676665,1.43915957265363e-07,6.10015942339143e-06,-24.9763443360306  
"Kmt2a",5683.03367175837,-0.0929793553932524,0.210196298322436,-0.4423  
45351156585,0.658239318118751,0.767283447401173,-0.024630137572246  
"If46",1738.22830764612,0.259366829715739,0.0982533184507296,2.639776  
79131318,0.00829606469702952,0.0292666309865536,0.915903975560344  
"Tmem25",3141.82875956731,1.79394489700143,0.616206137641802,2.9112739  
835192,0.00359958224351785,0.015524143902701,7.47242415595258  
"Cd3g",509.105927864499,-1.28234270775578,0.51531266579889,-2.48847504  
217223,0.0128292241417573,0.0409401329486063,-4.09791135877277  
"Trappc6a",1160.22463774631,0.205712468874694,0.25710586158401,0.80010  
8047351835,0.423648199062128,0.566821696652259,0.116785127058407  
"Supt6",3831.97800100253,-0.115806347119484,0.0945302752799774,-1.2250  
7151043929,0.220548278252917,0.356482660148833,-0.119450735740963  
"Spag5",258.898427230234,0.491430635426155,0.384217640861443,1.2790423  
5298601,0.200882141897253,0.332552216226239,0.541044681143021  
"Foxn1",18.5335419300792,-1.56854692668901,0.676725769283019,-2.317847  
19584546,0.0204576270804559,0.0584723037706221,-4.45342169161098  
"Unc119",872.297796495439,-1.13720997666035,0.311609811344184,-3.64946  
781282269,0.000262784162685407,0.00208622378014661,-7.01931446305403  
"Rab34",3075.14295585033,0.298680095486143,0.180075256123684,1.6586404  
0354881,0.0971882750711712,0.193010489645314,0.49133196521563  
"Sdf2",3038.88335341801,0.164153206629527,0.140976929270983,1.16439766  
051362,0.244262895248566,0.383409712931,0.157365654568926  
"Ccne1",87.3653858369512,-0.669098086230178,0.351223629901035,-1.90504  
860512578,0.0567737532544486,0.128196252571539,-1.37445658232087  
"Hsf2bp",340.4234759205,1.91013374676663,0.576172839213413,3.315209632  
88435,0.000915744227391086,0.00550236700945189,9.93761773352201  
"Bbc3",528.385572045324,-1.09940316139782,0.2004531639535,-5.484588717  
45645,4.14432462815694e-08,2.32092203512231e-06,-14.2631575114655  
"Mybpc3",10.6057882504706,-1.51820780922322,0.793562507967115,-1.91315  
465887173,0.0557282560918998,0.12628888159924,-3.14145022227041  
"Psmc3",8209.07974814775,0.346659852675923,0.161740174476653,2.1433132  
1081865,0.0320879567391124,0.0827252387279139,0.863956271614974  
"Acp2",2842.00450701761,-0.121008828292243,0.132424836801475,-0.913792  
5423586,0.360825865839919,0.505973439875808,-0.0824398177341787  
"Rapsn",139.881533067322,0.517599798217135,0.483203440287537,1.0711840  
0876685,0.284086700412609,0.428095098898296,0.4391368004958  
"Slc39a13",2353.36275320726,0.0131963615179296,0.159366264698889,0.082  
8052382532978,0.934006403911106,0.958802786298719,0.000555169218798936  
"Celf2",3325.17933753452,-1.29384592783162,0.295034257947093,-4.385409  
12785675,1.15767980605428e-05,0.000191129897192603,-11.0786298569866  
"Nr1h3",2158.89764592634,0.0639731945195192,0.311927103984111,0.205090  
207623567,0.837501647008378,0.896266988844728,0.00700614797947395  
"Ddb2",1007.7462151127,-0.0059390653953473,0.141115468983792,-0.042086  
5652654241,0.9664296900473,0.979592747792798,-0.000122453771545703  
"Spi1",1332.3358066706,-1.15688060086731,0.38089093218511,-3.037301503  
16384,0.00238706562462548,0.0114300111858909,-5.17300644091761  
"Sf3a1",1791.98758637326,-0.0456119682186147,0.100293793436754,-0.4547

83557941476,0.649264960197096,0.760916523046401,-0.0124626320088202  
"Stat6",5566.30283937142,-0.24633850410762,0.101199051431329,-2.434197  
75801733,0.0149248384337,0.0460231693468739,-0.758380262891407  
"Clgn",5.80287675760738,-2.17465118926409,1.07696879331178,-2.01923324  
312566,0.043462982659894,0.104557832930612,-4.91039486483327  
"Napsa",55611.0447809509,2.39375977368857,0.73689357584293,3.248447065  
03291,0.00116036797149968,0.0065846492166184,12.0238893711824  
"Vrk3",1933.32349108405,0.481993955031429,0.166699893877595,2.89138729  
377566,0.00383545136141772,0.0162573110097658,1.98543555489962  
"Smg9",1502.80360304899,0.0358556238118649,0.210807659014534,0.1700869  
12304229,0.864941786013697,0.915014646177368,0.00318452465395887  
"Paxip1",1082.11092308665,0.118145814092836,0.142365664723832,0.829875  
759172841,0.406609031670445,0.550521692903989,0.0705199271135958  
"Rmnd5a",5055.1243086348,0.0216510612921606,0.157996577403974,0.137035  
001946922,0.891003128524607,0.932561768321665,0.0015116747215013  
"Mov10",1554.43595207219,0.163622385203067,0.165625917462999,0.9879032  
68458092,0.323200024585593,0.468114253407361,0.12419640676655  
"Ppm1j",428.675426065116,-0.0847045281219489,0.308278610349448,-0.2747  
66153986267,0.78349590279054,0.860120663960922,-0.0127634979062184  
"Rhoc",5361.21106281145,-0.137870034546062,0.182529279407759,-0.755331  
062465154,0.450050365243188,0.590795261665096,-0.0725590343348374  
"Tead3",1662.56377959775,-0.188924118476675,0.175959928546681,-1.07367  
694472866,0.282967498067723,0.426903456926994,-0.160811716084374  
"Ppard",1871.2318146472,-0.764259635973084,0.211075427146492,-3.620789  
24252356,0.000293705698735584,0.00227429456471264,-4.6513493787613  
"Def6",618.821799889642,-0.780977502001077,0.150023198427649,-5.205711  
58451683,1.93254606071655e-07,7.4763458515578e-06,-9.218476003417  
"Peg3",2063.65104754282,-0.296469702408975,0.226187951967249,-1.310722  
78532281,0.189951437741563,0.319419847614057,-0.338345723187991  
"Zim1",172.630708244435,-1.09845582030324,0.38846808667625,-2.82766038  
698746,0.0046889520643819,0.0189012171493319,-4.35925373366467  
"Metrn",650.176678576963,0.683027840189049,0.271445425546379,2.5162621  
1351404,0.0118606938112331,0.0386722086841845,2.2216396160905  
"Lmf1",1202.26763731416,0.689500705019593,0.142176525383842,4.84961004  
046278,1.23704428583061e-06,3.25944452501691e-05,7.1234859853739  
"Ciao3",2000.60795238585,0.576713939908619,0.126282465031439,4.5668568  
4560434,4.95091873964631e-06,9.8704512868736e-05,5.31925175533744  
"Angptl4",5232.32609591511,-0.536946833949793,0.548542486601938,-0.978  
860976250033,0.327648676193846,0.472416911072071,-0.402652885369806  
"Dbf4",425.843026841348,-0.095657011682132,0.250208597912553,-0.382309  
051248366,0.702232141774282,0.802022159109357,-0.0211037582477774  
"Daxx",1028.601343496,-0.324441769246885,0.114884628477532,-2.82406596  
553808,0.00474186243637362,0.0190632646978171,-1.28478684641226  
"Cd320",879.070139560806,-0.044927194265351,0.270984935957182,-0.16579  
2220540443,0.868320468505232,0.917493767675446,-0.00386865786622481  
"Ipo4",2098.31642621612,0.126044177023538,0.0932781236328126,1.3512726  
4694676,0.176608110758685,0.302992075985293,0.150502876349728  
"Tm9sf1",3745.27867335941,0.170198671546657,0.0799955194969047,2.12760  
255345604,0.0333700503465365,0.0852639551378285,0.41902972156843  
"Rec8",1228.27328634103,1.00020416818163,0.469208365525512,2.131684432



05698,0.0330327974777488,0.0847081983246778,2.46904688742211  
"Irf9",2617.44556907115,-0.462485855242609,0.253736466091194,-1.822701  
57051998,0.0683486023170573,0.147418257519688,-0.885420587570903  
"Gmpr2",1259.47271363864,0.0943458720718807,0.172809294898883,0.545953  
689164035,0.58509777134774,0.708963498163417,0.0324503794356121  
"Mdp1",3318.57932476288,0.195931952256158,0.126744881100064,1.54587665  
044612,0.122134360664941,0.229685162446472,0.288224868933676  
"Dhrs1",2618.28330913492,0.87641893653465,0.216807010400483,4.04239205  
603058,5.29086714017552e-05,0.000602930026295396,6.4975153174136  
"Ncan",77.6474036005855,-5.52435417483783,1.69546340762785,-3.25831518  
980822,0.00112075849965128,0.00641966781028222,-27.8890883266667  
"Tmem161a",1998.58109324743,0.0996153772338037,0.102566027412524,0.971  
231700659981,0.331432911164954,0.476253143333648,0.0738952598582732  
"Armc6",421.013300898027,-0.157244353293705,0.129102162750499,-1.21798  
388147527,0.223230098032444,0.359268712458654,-0.160968633566769  
"Borcs8",1033.44959451498,0.0778469761080042,0.171075245822941,0.45504  
5238915362,0.649076693192016,0.760787337773244,0.0212834731251815  
"Slc25a42",3365.84562235878,1.88425898057903,0.360916223451388,5.22076  
553544793,1.78185017491757e-07,7.07586857648529e-06,22.3450887529366  
"Snx9",3895.31784385012,0.116225789193889,0.112632978927824,1.03189838  
624767,0.302119722034853,0.446722005254968,0.0936569248170426  
"Ranbp3",3300.05562928782,0.0889618276032014,0.120931093627296,0.73564  
0644062787,0.461949420821426,0.601234217153472,0.0452611720113898  
"Ndufa11",4035.24673285188,0.544860239658902,0.288303593287154,1.88988  
362387914,0.0587735261888636,0.131493541437804,1.10541111555934  
"Bmp8b",10.5113721386531,-1.71676422501179,0.838386085994485,-2.047701  
23656738,0.040589282616861,0.0990179302266306,-3.96993886888726  
"Nr2f6",4612.81856004246,0.247477438271423,0.13323619423463,1.85743400  
802648,0.0632494318504976,0.13889372927368,0.488531890631033  
"Use1",4222.91134218797,0.135341429991549,0.161608487449961,0.83746486  
4173391,0.402331318814246,0.546171137940554,0.0818575979232085  
"Ocel1",673.81537844348,0.369876642294412,0.172454176633434,2.14478216  
483337,0.0319702678512882,0.0825014353013835,0.922819877610935  
"Dyrk1b",847.432245892072,0.205698104091977,0.194521228061281,1.057458  
38714927,0.290302436533962,0.434106672869023,0.171647865358467  
"Braf",2145.04910443544,-0.0391592230140593,0.120179246627735,-0.32584  
0143892383,0.744545304348176,0.8338394224113,-0.00711579605514452  
"Ndufb2",3555.1743369128,0.793585739567127,0.348848654091902,2.2748711  
5188371,0.0229136603591862,0.0639065297787745,2.18262563143063  
"Hltf",1850.8624180177,0.23554596487745,0.0997857199634267,2.360517767  
10918,0.0182494441173271,0.0535159665212278,0.689625641484123  
"Prpf6",3164.3502018912,-0.0929567053906646,0.113841166141692,-0.81654  
737509423,0.414187139348856,0.557645411063665,-0.0542896889487403  
"Rgs19",637.18139133953,-1.21135250145846,0.229676094452451,-5.2741775  
5141793,1.33352756648525e-07,5.70200010774768e-06,-14.6267102344135  
"Rgs20",7.10226084128429,-1.65440702946615,0.675122306640853,-2.450529  
35326317,0.0142646331479457,0.044600996972201,-5.14520431736519  
"Abhd3",2327.47074211501,1.68866847657137,0.440785412499404,3.83104437  
825209,0.000127600485838993,0.00120307266580691,11.3527095160859  
"Snrpd1",1832.34163300535,-0.0228961248798849,0.139648523605895,-0.163

955366578027,0.869766280549246,0.918324738081399,-0.00195084613464001  
"Tchp",1282.03726334841,-0.00644426782982483,0.186375064965957,-0.0345  
768777116292,0.972417139385582,0.983164907824719,-0.000109413441759126  
"Tiam1",755.029596402744,-1.51225656843858,0.26879794949671,-5.6259974  
1281543,1.84439109856025e-08,1.28682027797923e-06,-20.511244384288  
"Tsc2",3514.8771956691,0.354532301067369,0.145645281937789,2.434217547  
93818,0.0149240224019712,0.0460231693468739,1.09146680362037  
"Rpl3l",66.7994552019207,1.55257396429844,0.519652007189368,2.98771859  
401798,0.00281068217302647,0.0128765697861067,6.75733895083062  
"Slc9a3r2",3940.25947175276,-0.15883362741756,0.175771363692984,-0.903  
637680680403,0.366187554079897,0.511190957602132,-0.106579280268827  
"Puf60",4848.70463714218,0.0265147580276936,0.0833307506406952,0.31818  
6957681681,0.750343125339199,0.837638283399959,0.00469759089548838  
"Golga2",3049.74357749965,-0.134470760034345,0.170207341509127,-0.7900  
40892725735,0.429503887052089,0.572143662618134,-0.0750837875379138  
"Uck1",3755.99347078378,-0.821281810300726,0.469321293414955,-1.749935  
11230819,0.0801295110355089,0.166504464078745,-1.47233913391178  
"Scin",2378.52027210771,-0.509060075611343,0.53646986865403,-0.9489071  
15489159,0.342667855296332,0.487155511671009,-0.366101692149968  
"Ikzf4",427.150397138181,-0.45137746663086,0.319321746661492,-1.413550  
66277198,0.157493876092849,0.278184948733826,-0.577523522470567  
"Mien1",4826.60893604025,1.01622065797589,0.298157159087721,3.40833894  
810791,0.000653596540014241,0.00424087365630538,5.55159920705625  
"Pon1",97.0687422197876,-3.72057413871643,1.25887408477785,-2.95547758  
406114,0.00312185381858329,0.0139295754550897,-15.9007701236303  
"Axl",5980.83612133953,-1.28299453952652,0.281971788226543,-4.55008122  
477748,5.36252114341592e-06,0.000104873056423594,-11.7557709516173  
"Tgfb1",2131.02913239166,-0.99992611660935,0.195692319899577,-5.109685  
02556707,3.22696332006695e-07,1.13984294954104e-05,-11.3811940322781  
"Ccdc97",2274.2383611371,-0.133500667077968,0.0954784281071249,-1.3982  
2858131035,0.162044436562459,0.284080419357564,-0.168010311055667  
"Zfp40",607.249749164694,0.524134865870205,0.22957565716501,2.28305941  
641486,0.0224268686969662,0.0629132292404499,1.44975641821297  
"Akap8l",6043.73947050706,0.58467695625897,0.262592905843828,2.2265527  
4856014,0.0259771799099751,0.0705141380878039,1.55052940539437  
"Shh",408.418534714087,-2.79036606457558,0.721839956279507,-3.86562982  
597642,0.000110802888808597,0.00107324129458024,-19.0779335842774  
"Pdcd2l",619.241934434882,0.0351402657097204,0.153397405709376,0.22907  
9921835813,0.818806798603948,0.883807294020138,0.0043403932575679  
"Gtf2f1",2761.41424524381,-0.00659366494269923,0.116904120419773,-0.05  
64023314064812,0.95502129972007,0.972274712925121,-0.00018539333861676  
"Clpp",2989.39216191064,0.55810590807273,0.227508450762426,2.453121658  
56876,0.0141622431805633,0.0443448558751603,1.73892326394673  
"Alkbh7",796.995598440942,0.572255441053179,0.188130454878308,3.041801  
18749695,0.00235167163813494,0.011313321885111,2.56471974005947  
"Pspn",0.675443762612156,-1.14420503969377,2.05803779104854,-0.5559689  
15959902,0.578232104494061,NA,NA  
"Dennd1c",929.331647499248,-1.27993267943954,0.48032719971653,-2.66470  
997310772,0.00770547456410993,0.0276805829021989,-4.59114935453455  
"Med6",876.583717235735,0.020047960796706,0.0928563580686525,0.2159029

40990683,0.829063404587422,0.891010752359036,0.00231351029443426  
"Prkd1",505.564051409592,-0.13801499479278,0.319417726685389,-0.432083  
078872822,0.665681032490022,0.773553177870579,-0.0354368489851449  
"Lcp2",644.849264300721,-1.41890067903458,0.416647649609737,-3.4055170  
6067135,0.000660388871118564,0.00427569085520574,-7.73983302571163  
"Cse1l",1979.64793449925,-0.183046607045956,0.144684331726499,-1.26514  
464186747,0.205819482507896,0.33879850316074,-0.198120446496234  
"Naa20",2246.76910117456,0.132535935087313,0.132029299903553,1.0038372  
9357143,0.315457045418669,0.460732694499866,0.102707032075596  
"Prkra",902.372698518442,-0.116590952919427,0.139412150190806,-0.83630  
4100896911,0.402983846701037,0.546828522720915,-0.0703766324593662  
"Fkbp7",591.129712641675,-1.57153940137893,0.292816031178726,-5.366985  
52689457,8.00634786190074e-08,3.87065895599706e-06,-19.5846588463568  
"Plekha3",1885.42529756792,0.100242753578778,0.10974956456919,0.913377  
232723157,0.361044175458596,0.506106294483983,0.0682661736265669  
"Ykt6",4065.01094237714,-0.385511538608771,0.183851638634902,-2.096862  
13009138,0.0360057817281691,0.0903992701694362,-0.926584340519839  
"Baz1b",6341.4123049025,-0.0199945980953565,0.130214670516423,-0.15355  
1040109837,0.877963743310505,0.923773558241121,-0.0015853377639832  
"Pex6",4310.21799958483,-0.0799734550947776,0.242719620011381,-0.32948  
9042093209,0.741786075139145,0.831876263309317,-0.0147208395339989  
"Mrpl2",2636.17316732323,0.572529755003593,0.241001649021884,2.3756258  
8192749,0.0175192154925337,0.0519133227467206,1.6936459684199  
"Mea1",2633.9828632278,0.276368188606874,0.187873988670743,1.471029547  
8488,0.141283126180412,0.256016579392721,0.376555270034042  
"Gnmt",365.961859258923,1.25415989308061,0.441908284320287,2.838054722  
16859,0.00453894002513264,0.0184311502551563,5.00875479090328  
"Grin2d",115.849264200023,-0.966023483461857,0.329299065396494,-2.9335  
749322541,0.00335082760082681,0.0146984109248417,-4.07663445166652  
"Kdelr1",5418.48380824716,0.260045902795885,0.175397093680291,1.482612  
38165034,0.138177425581733,0.251703644410745,0.358734076457841  
"Tmem143",1392.43882072097,-0.365376945832576,0.464426835391531,-0.786  
726601456068,0.431441928332206,0.573588893946636,-0.20309198090231  
"Pdxk-  
ps",17.0425525829712,0.852447977138646,0.518493844098014,1.64408504911  
295,0.100158635771884,0.197601242566042,1.38224797981372  
"Ggct",1979.88453969885,1.73938140489232,0.382351460460657,4.549168983  
94141,5.38581813752672e-06,0.000105197868167418,15.9321553635183  
"Jag2",1659.98171257353,-1.70335217693102,0.417891575098753,-4.0760624  
9666195,4.58047128917172e-05,0.000540945058729681,-12.812943548122  
"Btbd6",934.258919674433,0.552546022771119,0.106581617916996,5.1842525  
3406672,2.16882901820696e-07,8.22720392937728e-06,6.46924438666791  
"Nudt14",951.286353465295,0.728341017102068,0.212040611511262,3.434912  
83066491,0.000592744462395808,0.0039230589028491,4.03565279477149  
"Epdr1",531.862323395182,-0.163518036531733,0.320765389933416,-0.50977  
4563164922,0.610209408258225,0.72996256066487,-0.0514692695970568  
"Flii",4909.64155523323,0.143234123043416,0.210503006502609,0.68043742  
1883759,0.496227532771569,0.632001674114596,0.0657248731943361  
"Top3a",544.195678870172,0.095704820714622,0.119740500445974,0.7992685  
87972897,0.424134688904396,0.567239053725078,0.0542621883358032

"Atg4d",2064.11539419632,0.624669786049263,0.14057417133977,4.44370242  
481763,8.84238836032373e-06,0.000155183517776411,5.47891757309076  
"Qtrt1",489.909389079625,-0.16324530065363,0.120939814379571,-1.349806  
11216487,0.177078183766817,0.303584843672328,-0.194603769023593  
"Plin4",5781.71482549265,-3.72344824775972,1.17823476502261,-3.1601921  
4361603,0.00157665125619569,0.00836049665306055,-17.8138605329012  
"Hdgfl2",3289.55776652535,0.24269517136587,0.213106417493973,1.1388449  
6872429,0.254767821991796,0.395447243697575,0.225157506701275  
"Chaf1a",432.534494869049,-0.513007599992083,0.338917119453701,-1.5136  
6682455875,0.130110363197585,0.240235971744935,-0.731617387242292  
"Adprh",1549.46344455652,-0.583895173027562,0.152382179771014,-3.83178  
120896411,0.000127218852460597,0.0012006356172685,-3.92663909057049  
"Tmem39a",983.323598588491,-0.141414497925606,0.174507696804372,-0.810  
362525637682,0.417731849151109,0.560907347617129,-0.0817657980546232  
"Timmdc1",1569.85545119322,0.0480020630363747,0.213119427842972,0.2252  
35510071578,0.821796066042093,0.885758966041389,0.00582315007960213  
"Pla1a",781.853084848243,0.314340899617139,0.183562014848431,1.7124506  
9344381,0.0868136437544098,0.176930325694939,0.544438206796603  
"Mcm2",785.399809140925,-0.403427083788146,0.231339308279457,-1.743876  
07012643,0.081180702180704,0.16814778800463,-0.719274987106835  
"Tpri1",2663.17134772277,0.451077138782455,0.170097517582492,2.6518737  
3215895,0.00800464704973299,0.0285171949891639,1.60459326813239  
"Nab1",2142.11552112788,-0.496686187161195,0.188456176540608,-2.635552  
71192808,0.0084000377775364,0.0295532184385429,-1.7491115135826  
"Adgre5",2733.95036916777,-0.637023800144013,0.173688052406112,-3.6676  
3166101111,0.000244807501077065,0.00197568570198701,-3.96664512043685  
"Il17ra",1735.35162654391,0.391878254240051,0.222609039567416,1.760387  
87553986,0.078342063665407,0.163615752176731,0.709391564917903  
"Lamb1",7778.89929056249,-0.056251359108184,0.134498986727606,-0.41822  
8869055401,0.675779790417376,0.781330310339066,-0.0138804327062666  
"Kcnn1",227.789135952636,-0.63433767996272,0.307375207102944,-2.063724  
28648831,0.0390438652988014,0.0962405919191881,-1.4849236484603  
"Arrdc2",1433.66105737773,0.794418764316227,0.327772015847893,2.423693  
07294643,0.0153635840984041,0.0469749353537217,2.42944468160623  
"Ppp1r17",0.23819938385719,-0.541377195517438,4.78471990595033,-0.1131  
4710289398,0.909913932025132,NA,NA  
"Cd36",19276.9125506976,-1.08670884387926,0.735581944382011,-1.4773457  
2902309,0.139582985872279,0.253737559065607,-1.49037203638624  
"Map2k7",2660.04928025577,-0.123805942313448,0.145752918751076,-0.8494  
23417207099,0.395645727397635,0.540065835396183,-0.0762724124532595  
"Timm44",3179.32689130347,0.0897049927547805,0.169641268358103,0.52879  
2278099561,0.596949555034569,0.719305337063229,0.029555044967069  
"Ap2a2",8309.90134801208,0.164786999680744,0.150969926267045,1.0915220  
2531554,0.275043245674407,0.418445162621691,0.143563988195139  
"Pnkp",1469.37592810488,0.0923582240933007,0.124032709098046,0.7446279  
67613713,0.456496655817094,0.596486516225821,0.0477213690143878  
"Med25",3600.95280743027,0.379251343823711,0.103540167272538,3.6628426  
804203,0.000249431739156636,0.00200718945525221,2.35553761188058  
"Bcam",14507.0624087469,-0.246598742571379,0.254601907582466,-0.968565  
966032698,0.332761791100214,0.477498416487162,-0.182284418266684

"Clptm1",7626.96064507797,0.499229031119385,0.152572762027007,3.272071  
79372565,0.0010676246161929,0.00619355690762545,2.5382030726214  
"Relb",1619.22890453238,-0.991727943857009,0.267506498183776,-3.707304  
12378878,0.00020947732524075,0.00175521653955485,-6.29267550036653  
"Tomm40",3238.70213939905,0.317425179281132,0.168312060709308,1.885932  
46344572,0.0593040561958383,0.132422181368124,0.641757567449626  
"Apoe",69047.616478261,-1.80870711564784,0.230276557751056,-7.85449953  
443879,4.01371564354223e-15,7.11449341979877e-12,-46.4274987228933  
"Apoc2",36.4347012132377,-1.59607374651927,0.438474747436529,-3.640058  
53438643,0.000272576069566551,0.00214215566481605,-9.8093776904449  
"Hbp1",3757.49536846981,-0.15873372363212,0.16348990630874,-0.97090840  
172336,0.331593893963916,0.476406456773638,-0.117698498608103  
"Prkar2b",3110.23040487678,-3.15724800826246,1.03886820534828,-3.03912  
276072016,0.00237268149036013,0.0113834999259453,-14.1305487087307  
"Cdkn1b",3844.6376283276,-0.256213249349437,0.11326079906562,-2.262152  
93784918,0.0236879558430657,0.0655782710532579,-0.698055783363636  
"Klf4",1932.77438610767,-0.667403911926687,0.209211244409154,-3.190095  
79916004,0.00142225639205093,0.00772455574713343,-3.24581945999019  
"Ap1m1",2358.31573102556,-0.204753101125791,0.106870723557625,-1.91589  
515172869,0.0553784427396548,0.125627559806607,-0.42474671755397  
"Rab8a",4113.2512961644,-0.00156145308065094,0.184891753904729,-0.0084  
4522834401542,0.993261762789243,0.995815397514637,-6.54776992404e-06  
"Hmgn2",6963.30650865387,0.251053867332094,0.146989483711483,1.7079716  
2486041,0.0876416076509371,0.178356754616217,0.432809208902715  
"Fam32a",3724.50626571145,-0.0981055568698078,0.165163040248809,-0.593  
992195360518,0.552517333047011,0.682395829464155,-0.0374905867222599  
"Elf3",3465.4381542118,-0.556811096853278,0.218170429748373,-2.5521840  
7689565,0.0107049944146054,0.0357775079012642,-1.8544236408289  
"Cyp2c29",1.66377110143723,0.276291081744976,1.20537909579297,0.229215  
093168026,0.818701742192496,0.883742820642711,0.034146589766675  
"Stard3nl",1689.79868502254,0.2747190033889,0.190471755803794,1.442308  
34765806,0.149215406308304,0.26694210406453,0.362827838948349  
"Stk11",7741.67503085321,0.232658378987823,0.163935579380069,1.4192061  
2881983,0.155838929682679,0.27610608368495,0.299424383305899  
"Efna2",128.235284786576,-0.931959430706539,0.302489971538163,-3.08095  
976196342,0.00206334530595877,0.0102317158635768,-4.27048320236697  
"Atp5d",14188.7666056569,0.940447938362452,0.316604323871468,2.9704203  
8738626,0.00297392477063336,0.0134474919243528,4.05235505416737  
"Ppp5c",3328.80740569287,0.344978415002252,0.110199815997422,3.1304808  
6223958,0.00174520370227237,0.0090116477189901,1.62458523597213  
"Cdk12",1172.15636651827,-0.0834232388295424,0.113598057175287,-0.7343  
72056212341,0.462722012810333,0.601934460326666,-0.0423461957572067  
"Lipe",8073.47578429748,-2.69343648165551,0.785182914976209,-3.4303299  
6551781,0.000602847669532383,0.00397986797491561,-14.8852945797304  
"Pafah1b2",3251.78943853017,-0.378047514615069,0.130887558122456,-2.88  
833805166855,0.00387283401208859,0.0163979408398922,-1.55400192855204  
"Tbc1d8",1013.919348842,-0.784772529828027,0.229074352815761,-3.425841  
95996486,0.000612896886033314,0.0040263690983415,-4.32793439463504  
"Cnot11",1944.32419509559,0.68184276011536,0.110055777478661,6.1954290  
4276481,5.81264746777541e-10,1.03031818478804e-07,10.9696417706701

"Slc2a3",285.163168110672,-1.02609224453526,0.257474307856585,-3.98522  
187738747,6.74171004874717e-05,0.000729974562027417,-7.41095212984815  
"Foxj2",1972.79506222622,-0.342991765872747,0.117003225097564,-2.93147  
274860792,0.00337358963372863,0.0147849518270265,-1.4454171668738  
"Sri",5943.354679922,0.057391711155458,0.119366352723406,0.48080308936  
3426,0.630656454360448,0.746285097233721,0.0167955456062372  
"Dgcr2",3336.61238532917,0.0175982082639305,0.139935670368584,0.125759  
273654656,0.899922480667068,0.938676966139543,0.00111368286448895  
"Irf3",5081.88175376442,0.26378465710095,0.163583234127326,1.612540909  
26966,0.106844285243455,0.207103079200406,0.415339135906576  
"Bcl2l12",589.282054487524,-0.385454737336063,0.125212931655894,-3.078  
39399843586,0.00208119555600396,0.01029319142675,-1.7639459641316  
"Zfp959",514.001744921417,0.062941717319068,0.125590034616636,0.501168  
086394735,0.616252832339186,0.735162804677183,0.019364856542098  
"Mpnd",2571.29240013235,-0.0842759167353804,0.123262559987476,-0.68371  
0582872391,0.494157939465547,0.630197625985953,-0.0389120293830303  
"Sh3gl1",1763.11922362077,-0.190073427135174,0.187605899260945,-1.0131  
527200581,0.310987219749877,0.456148591690802,-0.149195601730166  
"Ebi3",185.517737678051,-1.05840390894984,0.420664342279277,-2.5160295  
3370164,0.0118685236913707,0.0386848002230601,-3.44225604558848  
"Yju2",484.197063243132,-0.277601865515296,0.115670651985173,-2.399933  
43817999,0.0163980533287166,0.049409557070517,-0.834918538309294  
"Ranbp2",4183.78564204297,-0.142926918469252,0.12494697666859,-1.14390  
057510837,0.252664872519216,0.392984978013694,-0.133491439544482  
"Edar",44.2244185634663,0.311464280029845,0.3169985382019,0.9825416918  
21523,0.325833053929115,0.470704073906044,0.234696332040273  
"Grk5",1147.92029090315,-1.50751526579612,0.25473187950701,-5.91804711  
963675,3.25786644209725e-09,3.52899332711179e-07,-22.3972794233873  
"Dvl3",2633.83434920881,0.233302534501834,0.140706314836881,1.65808147  
823571,0.0973010218062938,0.193174820854554,0.383586623394589  
"Abcf3",2587.482659724,0.397648352957996,0.173284101866428,2.294776893  
40776,0.0217459135062495,0.0614584463755402,1.10919793033884  
"Eif2b5",2404.08242991871,0.385168695830994,0.157659726932047,2.443037  
94841028,0.0145642057544625,0.0452984237485801,1.19189799791864  
"Cyth2",3342.30428992212,0.343752165198101,0.132664848880446,2.5911322  
2604943,0.00956607284048318,0.0326830227307134,1.17594161639159  
"Sult2b1",131.345872138688,0.331852513779473,0.292356000246454,1.13509  
73248359,0.25633454231832,0.397171877473188,0.306428015480881  
"Car11",286.267556505051,0.0986998610425871,0.249387470240804,0.395769  
125639248,0.692275355205809,0.794456118602909,0.0227105938417867  
"Dlga1",60.1745119315778,-0.168883514268381,0.539152096416966,-0.3132  
3909410856,0.75409901901695,0.840195581302428,-0.0294060953492312  
"Plag1",45.123031140888,-0.550159023251989,0.413404302143579,-1.330801  
39804862,0.183254367822943,0.311407849382233,-0.641844021997225  
"Hck",642.898905326191,-1.11313745138456,0.407270357709897,-2.73316589  
413428,0.00627287286721029,0.0236652486969609,-4.16730566945644  
"Mrpl4",3689.83865295611,0.731200918724552,0.154807750672014,4.7232836  
5699028,2.32066810026719e-06,5.34850905662054e-05,7.19217093127407  
"Keap1",2900.23372976049,-0.0788800671314993,0.166937460280274,-0.4725  
12682288722,0.63656089156265,0.751087639341473,-0.0225780732989844

"Ap1m2",1192.51869010006,0.392885004750304,0.185169470256249,2.12175907943467,0.0338579745763588,0.0863183562094461,0.962455504113189  
"Glg1",10437.9688125505,0.556324121523444,0.125309011353494,4.43961783366136,9.01187625591431e-06,0.000157732103445078,4.87040211491717  
"Atp8b3",1.32315321844066,-1.02572411098206,1.97442055134091,-0.519506399123252,0.603407651655236,0.724784859087627,-0.330160501750479  
"Btbd2",2184.39541692484,0.2605811290944,0.11683600858159,2.2303152277958,0.0257265229384593,0.0700340186755305,0.692826376243022  
"Csnk1g2",5893.50998074921,0.0849228359926632,0.0871696722557733,0.974224564519213,0.32994505040199,0.474569828322367,0.063296939414348  
"Abhd17a",3001.39730878588,0.4734635015767,0.135318686394969,3.49887745876243,0.000467221256161423,0.00326987798012758,2.7096328551282  
"Mob3a",1146.58608825392,-1.10531605263014,0.217796959217827,-5.07498385927728,3.87528895646249e-07,1.30501526896555e-05,-12.4311699024223  
"Cacnb3",1637.15230396268,-0.284652171662297,0.381319589548154,-0.746492389755264,0.455370027080608,0.595533220740337,-0.147534681283369  
"Ccdc65",41.9133186698522,0.337519877264846,0.43796034171308,0.770663106035214,0.440906645572912,0.582596758971309,0.182348488052369  
"Fkbp11",220.112475081492,0.702659144544436,0.248175558446237,2.83129873442656,0.00463593997035761,0.0187068620740962,2.79578578342265  
"Ddx23",3972.25245918919,-0.319063589900689,0.0906324394806451,-3.52041268809527,0.000430875825020785,0.00307174290173867,-1.84594564043091  
"Pld3",2997.67989983241,0.0654008120025239,0.228708192934312,0.285957451560591,0.774910710068706,0.854443956493554,0.0102878331955235  
"Grik5",2173.49701676766,0.129391547845726,0.216926489147321,0.596476476221641,0.55085696424127,0.680905863368599,0.0497292108365368  
"Cd79a",197.674109649276,-2.14183392869398,0.743495493898546,-2.88076248783056,0.00396714465869885,0.0167065629709093,-8.76428515041306  
"Rabac1",8318.09070782284,0.407369941056503,0.16941720473986,2.40453702256521,0.0161929659138348,0.0489808329798248,1.2287606348857  
"Etv3",1805.58038976868,-1.35190756812481,0.255584646171567,-5.28947097713104,1.22670644497492e-07,5.32702054880198e-06,-16.415833000657  
"Prkcsh",5856.21339671702,0.270358692644217,0.166401798286311,1.62473420016194,0.104219206771549,0.203634241269832,0.430256888090337  
"Elavl3",41.4882080955303,1.59698604321911,0.495666143430167,3.22189857908683,0.00127344203457776,0.00707181383926476,7.90769722043924  
"Rab3b",541.842674384536,-0.45730666236979,0.51680958895092,-0.884864894434495,0.37622950393638,0.521410396456858,-0.297806256053097  
"Sts8sia6",1536.90906159906,-0.0733552070886362,0.176817035276047,-0.414865043824053,0.678240700816336,0.783299184068916,-0.0179163165844801  
"Fcgrt",9709.35901922208,0.232114701948004,0.239649300998225,0.968559895568914,0.332764821172816,0.477498416487162,0.171577896036877  
"Nosip",2046.56753632243,0.095132535590361,0.0983014030888571,0.967763761259525,0.333162366073217,0.477857864770898,0.070249854589863  
"Pih1d1",2120.62582657884,0.299241924531961,0.153216931147869,1.95306042413266,0.0508124357374984,0.117860180240172,0.639855921467122  
"Rps11",17450.9687913331,-0.35521506147375,0.195127033740196,-1.82042977164664,0.0686935820432621,0.148014969906014,-0.678617723565857  
"Supt5",5198.52282179895,-0.018443001489535,0.15506638171471,-0.118936169694514,0.905325925858505,0.942296743841837,-0.00109616051867965

"Dll3",0.883111623907397,0.539587025924548,1.83307576301766,0.29436155  
1666726,0.768481643376847,NA,NA  
"Paf1",4033.60135746637,0.0370258505770929,0.128420718538611,0.2883167  
99644448,0.773104248648436,0.853228428151197,0.00587703822900006  
"Timm50",2496.18052232534,0.4041322106366,0.215112278987785,1.87870358  
929881,0.0602849774563124,0.134035265255713,0.812165242817734  
"Med29",903.791693982809,0.572198960707163,0.159859234673872,3.5793925  
9420642,0.000344393756963912,0.00257773108379361,3.41078970981562  
"Bicd1",815.840599227167,0.49344009133878,0.343938336618639,1.43467604  
161239,0.15137943448006,0.269995994648024,0.646084873064601  
"Ncstn",4118.5585240822,-0.11079928505165,0.0948869227024968,-1.167698  
16004091,0.242928539253186,0.381765583985378,-0.106694006807109  
"Pex19",4422.5569454233,-0.50262187319011,0.357104050263524,-1.4074941  
822116,0.159280901177488,0.280395360342963,-0.639111190362581  
"Phyhip",151.718226157414,-0.41766391417605,0.71915894004832,-0.580767  
18638579,0.561397373210156,0.689516725650283,-0.155272542876624  
"Crhr2",26.3253691108374,-0.92307756945293,0.388070845192273,-2.378631  
58464167,0.017377033687098,0.0516175202362946,-2.73590418470884  
"Inmt",26679.4172364515,2.14933222962816,0.607708790329277,3.536779891  
67078,0.000405037072566451,0.00292064084352835,12.5434001966281  
"Cyp4f18",398.8598153583,-1.18008464004603,0.441730477894551,-2.671503  
77685222,0.00755122227109435,0.0272907751328633,-4.2497285248041  
"Impdh1",976.694270751456,-1.17225839345211,0.289763391972427,-4.04557  
106221221,5.21957288306227e-05,0.000596898721841338,-8.70256860980464  
"Dusp3",3433.81767556296,-0.332372933681386,0.199655450195681,-1.66473  
258483868,0.0959661190106153,0.191206559214079,-0.549878105027691  
"Prodh",6202.43136926448,1.50419060110441,0.369522640593756,4.07063177  
154029,4.68858110247353e-05,0.00055071056828933,11.2878992896254  
"Ess2",806.114084929695,0.0114767687767013,0.115249005100103,0.0995823  
674723514,0.920675892951443,0.951226658634901,0.000573871809594777  
"Slc25a1",14156.7787772765,-2.58087203999398,0.731955876005718,-3.5259  
9401766921,0.000421896498965619,0.00302072628954978,-14.9748853978813  
"Dgcr6",3051.61714001165,0.514325350951535,0.316204203278809,1.6265607  
6553807,0.103830417823965,0.203016996262703,0.820074067991727  
"Ddr1",6117.29637791413,0.356677386368851,0.275383030641865,1.29520466  
652395,0.195249635453688,0.325807900162954,0.39999490425655  
"Ier3",2170.44547492598,1.22317212683934,0.212716446439005,5.750247088  
62873,8.91131162902504e-09,7.24367910523317e-07,17.2931664428122  
"Fosb",104.993627081206,0.317084508141386,0.501259715771824,0.63257528  
6153105,0.527011030135024,0.659499458672274,0.131994077014859  
"Klc4",4061.56572908129,0.956185810760072,0.188973880798847,5.05988344  
37754,4.19512839361961e-07,1.37864223250853e-05,10.7014655424399  
"Ercc1",813.563984152945,-0.411388319148648,0.260044007874021,-1.58199  
499581604,0.113650712880511,0.217333272222541,-0.627911571478629  
"Cyp17a1",4.92528699178849,2.31460944945408,0.747339029680241,3.097134  
44304443,0.00195401231772451,0.00981688538288909,10.7019471698296  
"As3mt",1981.97484790589,0.667348790869558,0.24869050325017,2.68345104  
516612,0.00728666423891664,0.0265733039396239,2.42104009534149  
"Homer3",1033.11506433465,-0.934337502364081,0.174232655553943,-5.3625  
8544297285,8.20391407140692e-08,3.93338483275419e-06,-11.6287741053833



"Crtc1",1196.85984142126,-0.0445033738719254,0.16277780740027,-0.27339  
9516695122,0.784546124260388,0.860788944394184,-0.00667131978482655  
"Rnf215",1553.74527560872,0.161068572540096,0.0987035579705711,1.63184  
160583268,0.102712858033735,0.20133661465183,0.258157015072327  
"Sec14l2",210.482068722135,-0.048987672387954,0.355507482462225,-0.137  
796459440651,0.890401282623824,0.932247972198407,-0.00343680045833505  
"Aven",806.09142575271,0.106910169133471,0.286057716361677,0.373736358  
149134,0.708600472423213,0.806696561645811,0.0229651263936681  
"Cp",9350.80630249752,-1.22700978075834,0.270230540709661,-4.540603654  
70185,5.60933928598276e-06,0.00010818090741651,-11.2046921641595  
"Crot",10809.5960859487,1.63948126133408,0.321228327912544,5.103787925  
51706,3.32921350818416e-07,1.16750008961465e-05,18.6213276461052  
"Rps6ka1",1893.73996551459,-0.35625115049533,0.232792196796486,-1.5303  
3974247331,0.125932655829886,0.234869431232412,-0.51611013717939  
"Calb2",0.304877989334812,-1.80107325170135,4.75461944527084,-0.378804  
922756284,0.704832731513718,NA,NA  
"Snrrnp200",3651.7343958521,0.254479922936007,0.12406465633023,2.051187  
90849381,0.0402486509635333,0.098341879259019,0.59021663588404  
"Ciao1",2561.774127885,0.541816939702419,0.173062565049488,3.130757593  
63374,0.00174356013731055,0.00900554584298838,2.55191156177782  
"Has1",8.18015152183774,-2.2115068409759,0.753623156543165,-2.93449958  
613265,0.00334085998838172,0.0146744960697154,-9.3361951461839  
"Taf6l",495.5310190039,0.0475951602411868,0.104048859956709,0.45743086  
7200174,0.647361382200246,0.759735899250053,0.0130784078867993  
"Insig2",1743.10741428968,-0.286167608280985,0.229112152943254,-1.2490  
2849807301,0.211654650725836,0.345718554063194,-0.303947276902237  
"Kpna6",3354.57363147832,0.066238476391587,0.177747289687679,0.3726553  
38418802,0.709404980579133,0.807368060385607,0.0141734197125989  
"Man1a",5250.60011810682,0.87729320683829,0.223991776928056,3.91663131  
062203,8.97949153780271e-05,0.000908102313299156,6.14469629034883  
"Itpkc",613.341923052226,-0.117659977791601,0.117201632106618,-1.00391  
074489957,0.315421636982245,0.460715490140071,-0.0911834924076171  
"Coq8b",1505.92037692593,0.279601813810185,0.167494040060439,1.6693239  
5749301,0.0950531947750631,0.18996138891611,0.464400283079413  
"Brd8",2588.45760817863,-0.0599795191186462,0.123923771977543,-0.48400  
3336579484,0.628383501167956,0.7445895779868,-0.0176892866013254  
"Kif20a",169.092483552086,-0.637141119251668,0.403402783328615,-1.5794  
1676553245,0.114240494320629,0.218164658008191,-0.970050660398354  
"Farsa",1781.23160170728,0.117117116757007,0.100476078526874,1.1656218  
9203754,0.243767352621246,0.382748900097362,0.112476481957989  
"Gcdh",9960.1718651663,1.69830344494498,0.394472090364679,4.3052562815  
6594,1.66792528691994e-05,0.000249395761076419,14.0899227689875  
"Mast2",3145.78110893732,0.338174359293341,0.175662755796366,1.9251340  
8867024,0.0542125852779286,0.123581354386139,0.707073752843788  
"Dnase2a",1350.74849204863,-0.114895298131583,0.16904338425423,-0.6796  
79353548605,0.496707511824215,0.632456283259228,-0.0526386119353215  
"Rad23a",2560.75297635118,-0.098322025331156,0.198380034069821,-0.4956  
24601498713,0.620159292259872,0.738263820774365,-0.0298362155657121  
"Calr",38086.9893516389,0.287909193193153,0.136105964510368,2.11533119  
969346,0.0344017291080303,0.0873050779836489,0.702022416950177

"Syce2",117.372660894126,-0.33020205801476,0.302547436039017,-1.091405  
90427009,0.275094315559804,0.41849020556956,-0.28763960478348  
"Nfat5",9288.32868695214,-0.221388890172441,0.263579937612226,-0.83993  
0732885081,0.400947224864674,0.545013175572463,-0.13437094840996  
"Nob1",1289.84365325556,0.130403484714463,0.150314022218151,0.86754038  
5056077,0.385645994199423,0.530052558501364,0.0827774080160619  
"Nqo1",1519.16778320905,0.852129431344424,0.438358090785769,1.94391172  
253022,0.0519060973884331,0.119657730773193,1.809172914849  
"Ppfia3",97.8392125545018,0.39847734213021,0.273905253707981,1.4547999  
23462,0.145724659398169,0.262212939179172,0.533401116816391  
"Gys1",2156.33420251026,-0.656091943127026,0.460736370179767,-1.424007  
27529072,0.154444366050617,0.274158434928527,-0.849015195106806  
"Ruvbl2",1306.91542798869,-0.0999402436092408,0.115949574513681,-0.861  
92850666691,0.38872686097384,0.532897162009979,-0.0629050692504621  
"Lin7b",43.4386873478154,1.3809231795863,0.374571365976963,3.686675771  
3435,0.000227202530286891,0.00187156524526143,8.67355110544928  
"Bax",3574.23014810253,0.232577465762035,0.165207819864689,1.407787270  
3152,0.159194070871988,0.280318431668204,0.295798781062242  
"Il7r",383.02876936882,-0.917476242598322,0.397719262205206,-2.3068438  
7150689,0.0210635255083929,0.0598945049384053,-2.58285206667322  
"Tfam",2072.38398759378,0.0287800798805956,0.266343591044388,0.1080562  
13283537,0.913951101448806,0.947077943029806,0.00156488472428316  
"Zfp81",569.200306707907,-0.0317566658014674,0.15603030304224,-0.20352  
8834990921,0.838721710240332,0.896904662858871,-0.00345530647481539  
"Efnb3",147.320547906985,0.0576344619003191,0.24654824526353,0.2337654  
51620696,0.815167072101977,0.882271860774041,0.00721900673266718  
"Mmd",5274.15697717484,-2.79664271978355,0.671382225315695,-4.16550008  
971197,3.10670801283704e-05,0.000401954829690091,-21.8674272033491  
"Hlf",2360.19785899004,2.18223583531758,0.416933162955659,5.2340183732  
2704,1.65863954542362e-07,6.66807296013809e-06,26.0082787268267  
"Fam162a",2122.87589804331,0.439834089456854,0.240323242361815,1.83017  
707789856,0.0672234642239531,0.145458118459509,0.847941661481628  
"Rpl8",25139.5718602491,-0.115206127449294,0.222922800270885,-0.516798  
314525484,0.605296956748402,0.726237158493653,-0.0368519808553191  
"Grm3",0.816001034473348,1.20482612527588,1.9048877507936,0.6324919275  
55276,0.527065481669071,NA,NA  
"Ssbp2",1132.48555182935,0.145772337590904,0.180654395741234,0.8069127  
62862992,0.419716745158618,0.562720009427404,0.0838151718918329  
"Fancl",384.385412555286,-0.212989241997279,0.200991467095367,-1.05969  
295649859,0.289284308204472,0.43316368687141,-0.178195232671691  
"Brinp2",15.6664873223417,-0.729865849324573,0.557255299382065,-1.3097  
5129376771,0.190279985004238,0.319861983585881,-0.831949030838803  
"Gstm5",4667.74228708085,0.854144302547724,0.289633878494456,2.9490483  
1916641,0.00318754135184806,0.0141412244091771,3.63751105558366  
"Gstm7",355.566613919087,-0.96438282003388,0.278370460884275,-3.464386  
33240901,0.000531442680859235,0.00363326416248014,-5.41753989799356  
"Gstm3",2.55093141855818,-0.258904692313072,1.45232152660209,-0.178269  
541262544,0.85851129818889,0.910434748835363,-0.0242938163131678  
"Stat3",6037.03563409143,-0.457009271380808,0.180576811554294,-2.53083  
03289174,0.0113792879212633,0.0375102884004722,-1.50042543125548

"Stat5a",1533.91710470428,-0.0569470585268013,0.245668120818792,-0.231  
804836284828,0.816689600549372,0.882743712595579,-0.00710245802302434  
"Cavin1",9953.57502385867,-2.03984240344987,0.457700609601216,-4.45671  
768981723,8.3224085169388e-06,0.000147518473875703,-17.9945863255883  
"Map3k11",2715.54556486037,-0.058616043407306,0.0965240420720047,-0.60  
7268843585931,0.543672511414748,0.673999221371535,-0.0231255720922064  
"Akt2",6483.07155702469,-1.26125330310082,0.423884409353458,-2.9754651  
8642803,0.00292544553131442,0.0132765409462539,-5.45082983711652  
"Dnaja3",4135.85254913817,0.364961181579885,0.327162566485877,1.115534  
65758632,0.264621375336157,0.406499985717858,0.328527612340969  
"Hmox2",3056.20508249979,0.39087624870534,0.188266652362264,2.07618419  
832108,0.0378769181671985,0.0940451061651094,0.924023931083413  
"Cdip1",3746.27721112701,0.26932237338022,0.204239679494514,1.31865842  
155052,0.187283332967415,0.316050755253476,0.310219638419353  
"Map3k20",1195.32615307442,-0.493147395437385,0.168204153014294,-2.931  
83840351123,0.00336962030703071,0.0147708760671054,-2.07866453622426  
"Cwc15",2816.72302797359,0.312814069295589,0.151450542713816,2.0654536  
0412929,0.0388801011165642,0.0959236000975286,0.733299753719997  
"Col5a3",1412.46680462046,-1.94243837102244,0.519463158570059,-3.73931  
883132856,0.000184519575292484,0.0015905228466193,-12.5164755289844  
"Dnmt1",1461.75633629129,-0.408271522978483,0.179865351259288,-2.26987  
310296318,0.0232152834932792,0.0646009364516576,-1.11847060419453  
"Ppan",1944.86470869297,-0.00513573083939601,0.277374428742049,-0.0185  
155165985834,0.985227599231984,0.990459795299058,-4.92311362472301e-05  
"Angptl2",3155.69917796809,-0.777218290050663,0.193741458340272,-4.011  
62609546182,6.03019539200824e-05,0.000669190379928154,-5.6810319848234  
1  
"Cacna1e",89.1721352478548,-0.121246603983585,0.43318888161124,-0.2798  
93157766675,0.779559476820315,0.857497366018682,-0.0186401099680086  
"Cacna1b",36.2327888290092,-3.65798722124269,0.718655944097683,-5.0900  
3960975446,3.5798872751915e-07,1.23105188874222e-05,-41.3537520915545  
"Trmt10a",490.566231337181,0.667015801540157,0.299367971844897,2.22808  
003618282,0.0258751783076779,0.0703155716575755,1.7707682044896  
"Etv1",878.491252043145,1.25624467046438,0.407022024286351,3.086429223  
74288,0.00202576166455728,0.0100915434173577,5.7737727285486  
"Kifc2",1299.48201458457,0.637802972521676,0.221730397496119,2.8764796  
33483,0.00402138145522417,0.0168585026045927,2.60408584825069  
"Psap",82613.0041801403,-0.238184889448169,0.213152949389712,-1.117436  
5174403,0.263807728664198,0.405702492150625,-0.214874964768517  
"Ikbkg",1789.23387988973,-0.165471906968778,0.193135448895076,-0.85676  
6108528702,0.391574159577488,0.536046687035165,-0.103177363188305  
"Pax2",1735.85850886568,0.262577079773779,0.416275226597668,0.63077757  
9343103,0.52818596518191,0.660672950289767,0.108837238999298  
"Wars2",474.203643998636,0.117034681561487,0.132918447841798,0.8804999  
11500499,0.378588553095801,0.52346960515371,0.0757537769624797  
"Atn1",4978.53398909376,0.061499991578977,0.174928451262142,0.35157226  
3604022,0.725159069254359,0.819091155852247,0.012272932164318  
"Phb2",7584.54217396145,0.416724289712024,0.203046498886235,2.05235890  
29994,0.0401347954239703,0.0981460882231814,0.967341349497782  
"Pttn6",1889.25635528105,-0.430015368956774,0.352113277125605,-1.22124

156313305,0.221994571697824,0.357841448327065,-0.441911861296869  
"Eno2",530.738826825469,-1.04995901502651,0.326467022061442,-3.2161258  
0773596,0.00129933857651381,0.00718505489644535,-5.18233743333955  
"Emg1",3024.60882726189,0.204849569361959,0.1254745389052,1.6325987020  
899,0.102553424395707,0.20116566085186,0.328502203480136  
"Lpcat3",4095.20994311012,0.322092749208366,0.23772681174877,1.3548860  
8474148,0.175453853776934,0.30179638259343,0.385867989265599  
"Atp6v1f",6927.22136448606,0.884985988938997,0.189274769060515,4.67566  
804245341,2.92998236707596e-06,6.4992942199371e-05,8.53235512594033  
"Il12b",36.8466848537654,-1.47933894268079,0.572271603203911,-2.585029  
44126283,0.00973706825791977,0.0330985629171757,-5.04197975383523  
"Clcn5",3676.38022552378,0.46233350448496,0.352111755084026,1.31303058  
704936,0.189172641611503,0.318467291153607,0.52901841134272  
"Clcn3",4591.32258459289,0.688180616952822,0.157257797826669,4.3761303  
1890057,1.20804804908028e-05,0.000196944154355914,5.87196329115948  
"Hif3a",68.2569445564269,1.26928357129483,0.804010350000889,1.57869058  
687295,0.114407044975402,0.218355983660476,1.93137817780371  
"Gpx6",663.547602219002,3.21650664249855,1.09618957391372,2.9342612984  
492,0.0033434261033587,0.0146787043654688,13.5780244975673  
"Gpx5",1.06814846203625,-0.304119529372838,2.76875262628507,-0.1098399  
06420563,0.912536341757142,NA,NA  
"Pde1c",226.111381225608,0.232963218591104,0.466410251544804,0.4994813  
42486583,0.617440327447345,0.736134655881272,0.0713664697076842  
"Utp20",2065.7078988497,1.65564119249502,0.257817547170365,6.421755270  
99004,1.34711874858727e-10,3.05420015813426e-08,28.6494850638512  
"Spic",123.277797254326,-0.36949796449121,0.277514045919562,-1.3314568  
0344522,0.183038749398921,0.311177045582018,-0.431349429776781  
"9330159F19Rik",198.408784135249,-4.10562857310519,1.27652279067731,-3  
.21625951615544,0.00129873330461961,0.00718374524070161,-20.2651133513  
437  
"Cul3",3958.37258213917,0.361549587703699,0.220090575813412,1.64273089  
09865,0.1004386244398,0.198008330262216,0.585510097653736  
"Sst",0.108439792482169,0.86337900794553,4.78471990596623,0.1804450469  
23009,0.856803192346404,NA,NA  
"Il11",100.040400499586,-0.373779750042358,0.442739631076825,-0.844242  
809556615,0.39853373694384,0.542867877807112,-0.228338052702261  
"Large1",733.983906386381,-0.624096170544559,0.247852781202018,-2.5180  
115692786,0.0118019444420569,0.0385375074765853,-2.03213407720951  
"Ddx56",1349.98159363776,0.145184591898126,0.136446378927676,1.0640413  
6950443,0.287309959124599,0.431341609805307,0.122079176178929  
"Tmed4",5645.96724864588,0.493724891829214,0.162839686970261,3.0319690  
5505832,0.00242964110260459,0.0115741857362776,2.20150844466271  
"Col26a1",226.800487959512,0.891436556096476,0.271699009130852,3.28097  
094997926,0.00103450398554648,0.00603192545161045,4.55585500783241  
"Bid",1814.19059653956,0.974054352354088,0.274963710784401,3.542483295  
61512,0.000396378526456959,0.00287487747858919,5.69991790214576  
"Ralb",3120.59223204525,-0.164560668521866,0.100376877377322,-1.639428  
05177406,0.101124143460772,0.199103155528439,-0.265589764919969  
"Ppp1cc",8463.14073431057,0.310016700608236,0.106208331543613,2.918948  
97605968,0.00351213705494993,0.015261789234993,1.29661478177401

"Dnajb11",4826.21233084604,0.154553225540017,0.132123685907967,1.16976  
168563504,0.242096886368062,0.38076995163382,0.149230395096556  
"Tbccd1",950.486449608319,0.338867046429135,0.139297034337783,2.432693  
90507921,0.0149869644922197,0.0461636388103159,1.04220689214321  
"Clec11a",453.332820030222,-1.61002775613974,0.301019047489895,-5.3485  
9095982552,8.86416236890302e-08,4.17472072147031e-06,-19.942549383286  
"Zfp324",304.065318740592,-0.457228188156929,0.164013061710203,-2.7877  
5472751562,0.00530747103094866,0.0208219457065266,-1.77027221624917  
"Gab2",1331.48462164588,-0.971364680588066,0.177316495006139,-5.478140  
54498672,4.29818682142857e-08,2.39445847554898e-06,-12.5717450336718  
"Coro1c",3931.80919687477,-0.404584519498249,0.14991516381763,-2.69875  
647796657,0.00695990848105183,0.0256481375096482,-1.48210812708505  
"Tax1bp1",9556.59410100446,0.537452669759215,0.128797394374064,4.17285  
359204008,3.00808250150635e-05,0.00039179420584082,4.21619464457079  
"Psg17",4.23671711590237,-1.42330373435142,1.01008813948207,-1.4090886  
5149256,0.158808956101322,0.279766626857931,-1.81300358353402  
"Psg19",0.74570968381,-0.465305985687075,2.11969210044024,-0.219515837  
036159,0.826248244527519,NA,NA  
"Ctse",1245.00708150926,-3.42656014413704,0.820092802420437,-4.1782590  
1413087,2.93749017550209e-05,0.000384217140640084,-26.9475061753552  
"Ndrg2",5945.11158940079,-0.339197690061377,0.381684355236246,-0.88868  
6385511997,0.374171649960686,0.519296663885932,-0.222269446199138  
"Mettl17",1297.10764194445,0.0543199359233985,0.106575565518504,0.5096  
84707363504,0.610272368451602,0.72996256066487,0.0170978534590811  
"Arhgef40",2186.60940284234,-0.655183440558224,0.186316010265664,-3.51  
651712391228,0.000437248453325513,0.00310355673204982,-3.7838196595299  
2  
"Pnp1a6",3568.67447645243,0.443209459840815,0.161104112550601,2.751074  
77285291,0.00594000830404568,0.0226576300801261,1.67854884498772  
"Mcoln1",3101.01711197459,0.554626500852726,0.0989325896275778,5.60610  
515645617,2.0693026846194e-08,1.40378769404277e-06,7.47433334558632  
"Arhgef18",3357.59618488937,0.0856407748082876,0.109465506677486,0.782  
353979876126,0.43400657146728,0.576095045984685,0.0472293989993265  
"Pkn2",3004.15875748523,-0.0358686246530627,0.167722175617009,-0.21385  
7377661068,0.830658278941064,0.892056351773125,-0.00409712857857194  
"Cd33",625.857241540419,-1.25405702971276,0.372723612357574,-3.3645762  
9228403,0.000766612865798484,0.00479237501036833,-6.69757895145665  
"Etfb",21948.4000487071,0.668735623939495,0.472109038436853,1.41648553  
510789,0.156633396301084,0.277186237164506,0.858031716285465  
"Nkg7",316.357667739804,-1.05352843844267,0.499702260339901,-2.1083123  
3328033,0.035003981833437,0.0884077251021185,-2.5556449929761  
"Stxbp2",6289.22878534063,0.630777344227457,0.150575631589695,4.189106  
41494945,2.8005505705187e-05,0.000369722125301025,4.98488123769251  
"Pcp2",1.01507566517912,0.0446872662996229,2.68002654520492,0.01667418  
79402564,0.986696539338366,NA,NA  
"Sgce",729.890658079857,-1.35437149771695,0.253325561858097,-5.3463672  
9030769,8.97370210252123e-08,4.20599143257113e-06,-16.7657654713149  
"Chn2",821.292056266398,-0.0308822151027859,0.256669044897983,-0.12031  
9203724238,0.904230292248503,0.941457907740766,-0.00186298937653454  
"Wwox",507.760866107168,0.292208396925904,0.16174790527547,1.806566807

94876,0.0708298487008163,0.151452769193035,0.551537930818152  
"Slbp",1507.44490784041,-0.188930588056198,0.102702904962287,-1.839583  
68193746,0.0658293818966998,0.143108628411401,-0.367309647975196  
"Tyr",59.001457805781,0.201267856019144,0.361052536894555,0.5574475608  
18341,0.577221677927037,0.702407057119226,0.0710962981482864  
"Ghrhr",9.8702507536689,1.47776594706777,0.570150525581021,2.591887371  
43025,0.00954510148351562,0.0326337697221791,5.05751747582285  
"Aqp1",20864.6023870633,0.487643874803308,0.479015976035641,1.01801171  
401228,0.308672389243101,0.453575570537492,0.385528021586345  
"Arid3b",429.833577463978,-0.364085269197864,0.181108165530256,-2.0103  
1945816402,0.04439738875365,0.106215986002291,-0.816381355592054  
"Cnn2",4967.16861191472,-0.97708194359801,0.259498953857703,-3.7652635  
1676082,0.000166373523719178,0.00147051267700659,-6.37266931096654  
"Polr2e",2700.75579133859,0.222560381692763,0.15688983758401,1.4185774  
2426171,0.156022251499951,0.276369208425674,0.286216566921852  
"Abca13",1767.41068538001,2.35658271620857,0.987793974256108,2.3857026  
6434686,0.0170465270485406,0.0508604719804811,7.01948044601789  
"Myo9b",3476.98761817153,-0.43457410344799,0.203149680702674,-2.139181  
8187695,0.0324209460613669,0.0834623192902736,-1.07920395204036  
"Hdac9",188.040043266016,-0.81786101950786,0.247403896479636,-3.305772  
58945951,0.000947149252595681,0.00563377551162617,-4.2356821461343  
"Ly9",384.011367478078,-1.26496733938421,0.450580232700676,-2.80741862  
953525,0.00499402949238521,0.0198762169917385,-4.956434734005  
"Cd244a",147.8652876549,-1.0061748123354,0.349282047248064,-2.88069432  
787309,0.00396800258920951,0.0167065675846269,-4.11722041246334  
"Adgre1",1136.03441766138,-1.6389543227655,0.396955934104648,-4.128806  
70612024,3.64650787577634e-05,0.000454601090549151,-12.613540379744  
"Mtfp1",672.319657012107,-0.0358553152371684,0.45587009776375,-0.07865  
24832689291,0.937309041189745,0.961067084829494,-0.00142385275876508  
"Rab23",944.746693974225,0.190598285401296,0.153579691188469,1.2410383  
4254621,0.214591584862595,0.349315972754289,0.200467159722771  
"Rab11a",5329.85980751578,0.276150397436978,0.126776400009835,2.178247  
66609207,0.0293876030919444,0.0774114408385209,0.706564121775723  
"Eif2b2",1407.97019189822,0.35076812005002,0.170889109134212,2.0526066  
3963398,0.0401107430881139,0.0981278881721511,0.814302462551414  
"Dlst",14572.4893943864,0.351656917959554,0.291858840214053,1.20488698  
475484,0.228246933727585,0.364723710360633,0.354686502072931  
"Pgff",120.220521844315,-0.830901347529806,0.330565357352106,-2.5135766  
0156978,0.011951382008293,0.0388639170109569,-2.69850920143469  
"Ulk2",1870.9711906586,-0.10755785010271,0.132966955179014,-0.80890661  
8624943,0.418568861570679,0.561563635193733,-0.0620641256605677  
"Ccl24",19.5277757213276,-1.46028033487184,0.789467648701367,-1.849702  
56510691,0.0643564306036365,0.140679547129433,-2.86400502074938  
"Dgkq",2920.27330202273,0.602332005709806,0.210965909186669,2.85511535  
030452,0.00430212005245274,0.0177229530493817,2.4291415516891  
"Grap",961.438970984421,-0.468989856139939,0.204925449523253,-2.288587  
66556821,0.0221033212299515,0.062269983722236,-1.30204517468246  
"Pou1f1",82.3396319125408,0.760019226936549,0.404015306502861,1.881164  
43784084,0.0599495536437651,0.133481374551345,1.53052164785833  
"Chmp2b",3001.37477832383,-0.309353066967548,0.190882020115456,-1.6206

5063425269,0.105092586407278,0.204689579374993,-0.490714610830624  
"Plod3",2620.94575405583,-0.553803336675058,0.135012352003718,-4.10187  
163215856,4.09821627751343e-05,0.000497243441063827,-4.2124667742501  
"Ap1s1",3865.66394246571,0.089824233930685,0.154700891775065,0.5806316  
49242781,0.561488736929946,0.689545089920016,0.0333897506672457  
"Mapk13",1267.0349510007,0.42389072412142,0.256836467212394,1.65043044  
207145,0.0988549290743604,0.195603146650282,0.691648690268438  
"Srp1",5019.79670557556,0.375634133083525,0.115438637052475,3.2539723  
4994011,0.00113803355941038,0.00649001998870535,1.89225306448678  
"Pax3",0.25517397124712,-0.547356146356674,4.03474573159759,-0.1356606  
29632773,0.892089572912501,NA,NA  
"Lbr",1854.32711253011,0.0320645520336343,0.115527318025553,0.27754952  
3191926,0.7813581847762,0.858789283357742,0.00488124099902008  
"Crabp2",32.071449627496,-1.85951343039073,0.857457309409718,-2.168636  
74725781,0.0301102730122832,0.0789205677098398,-4.72188737939452  
"Nes",5831.3833707729,-1.0880363537727,0.229763174231546,-4.7354688470  
4953,2.18549275243245e-06,5.13406478155758e-05,-10.74656527495  
"Bcan",0.838096099454567,1.20539779973231,2.27842458692599,0.529048802  
689848,0.596771595764382,NA,NA  
"Hapln2",2.26595323308512,-3.47230290657867,1.72842833722197,-2.008936  
57654304,0.0445438603074509,0.106396690956104,-7.77997523327437  
"Prcc",2298.71804942149,-0.02048761690606,0.117277108519043,-0.1746940  
8279906,0.861320017520975,0.912222580207712,-0.00188222320905167  
"Rrnad1",2358.18352309429,0.197589507526471,0.22117300509568,0.8933708  
13680417,0.371658627167326,0.516875885342975,0.130399689530925  
"Hdgf",11715.4970863892,0.203816124717646,0.173355301624148,1.17571324  
792558,0.23970948286926,0.377942407541418,0.198315831894379  
"Slc25a18",4.63927655473556,-0.457916905275888,0.790187405228413,-0.57  
9504181218278,0.562249026162783,0.690261397312803,-0.169742889771453  
"Thop1",1039.20057403503,0.1401023845785,0.144942062778479,0.966609567  
249119,0.333739250055019,0.478439549798653,0.103287037741792  
"Apba3",2003.26500507333,0.585784220744904,0.218241682919511,2.6841078  
7943266,0.00727236359755893,0.0265486885274675,2.12567909395102  
"Matk",346.068448556123,-0.538589965446866,0.444540804848362,-1.211564  
74180269,0.225679037967275,0.361863846560386,-0.547469834136109  
"Pias4",2102.90116972558,0.470988351532443,0.174370434370393,2.7010791  
8944551,0.00691148802210372,0.025517930970456,1.72776137531458  
"Map2k1",2210.22031782057,-0.500293439049387,0.132017987475148,-3.7895  
8540890925,0.000150898922962411,0.00136784156202747,-3.2991957319169  
"Sgta",4538.08280842994,-0.212843998409313,0.262553091760649,-0.810670  
318075507,0.417555023210281,0.560824401911831,-0.123097779795926  
"Nmrk2",1.65805535393933,-0.391807520043772,1.30030196398064,-0.301320  
409333478,0.763170179308619,0.846433000919195,-0.0653238066542981  
"Tmem242",3295.53105508455,0.320945679207307,0.278806004101123,1.15114  
335590456,0.249673263938277,0.38924551713642,0.302826686074689  
"Dtx2",1346.95845643212,-0.97958828543422,0.305795956495335,-3.203404  
77935118,0.00135812943836925,0.00745308409494052,-4.79912749177393  
"Zp3",0.141717866057875,-1.11443143702664,4.7787435296438,-0.233205952  
59267,0.815601483774631,NA,NA  
"Hspb1",5029.8222314438,-1.44079975124259,0.231860614044543,-6.2140771

8244805,5.16271487381881e-10,9.62463073877169e-08,-23.2780725953875  
"Rasa4",2146.32337358557,-0.701957910913989,0.266620558870211,-2.63279  
738775019,0.00846848492057704,0.0297296577208158,-2.46781035996432  
"Syt5",31.1853584595691,-1.06369352355417,0.469037090156576,-2.2678239  
0108869,0.0233399420280242,0.0648819774254941,-2.90939898659611  
"Hnrnpa2b1",37015.9855208123,-0.167692884333905,0.109131878807367,-1.5  
3660769123114,0.124389407980243,0.232758606218692,-0.244454870159427  
"Fxyd4",1775.20303521894,1.3139007999802,0.579598273307021,2.266916346  
18485,0.0233953364673257,0.0649803804045465,3.59177106136966  
"Cc dc130",627.968306349569,-0.0954512586387128,0.132016150612218,-0.72  
3027131120417,0.469663215784955,0.607698276793034,-0.04754205511694  
"Mri1",1043.17041106029,-0.15818886093596,0.114776145049697,-1.3782381  
4232013,0.168129774497168,0.291914010965787,-0.194777312201651  
"Prkacb",3028.67891814068,-0.386823557375192,0.150650285149106,-2.5676  
9216860316,0.0102378026001533,0.0344706734493842,-1.3026849454919  
"Sgsh",780.206662317697,-0.15421118431586,0.111144096752392,-1.3874887  
5398586,0.165292778010324,0.288065658352279,-0.191926127041332  
"Chd5",83.4469547950323,1.6785927254896,0.509960449729411,3.2916135484  
2376,0.000996143938772471,0.005857302327559,8.62807762282598  
"Cstb",3811.84191464758,-0.453892711411308,0.368253054479821,-1.232556  
54200196,0.217741259110203,0.353145821837527,-0.472445219377689  
"Sh2b2",790.136551611732,-3.28149613685326,0.651522954327306,-5.036654  
6797133,4.73738307533096e-07,1.51177569890021e-05,-36.4234275705366  
"Pex5",3912.37378904913,0.128001527014962,0.297924696196783,0.42964389  
5417168,0.667454701179074,0.774783101958063,0.0326624257784835  
"Jkamp",2452.69186320972,0.393535725672295,0.118054410208119,3.3335114  
2899726,0.000857571483021057,0.00523674562353416,2.06687129057165  
"Cd44",2218.16625905357,-1.58313723525393,0.261544301048165,-6.0530366  
3245329,1.42140527460156e-09,2.06825074956576e-07,-24.3666864891381  
"Slc1a2",203.341345851405,0.959972716454319,0.658789421715647,1.457176  
88355456,0.145067559884592,0.261344108161302,1.28820401296064  
"Eif2ak4",875.85397808252,-0.12347569880664,0.174592098608626,-0.70722  
3865172898,0.479427370015101,0.616817872685875,-0.0596611709779034  
"Wdr1",6855.40412430222,-0.554707189673811,0.141301735573111,-3.925692  
68469316,8.64805102033107e-05,0.000883078642617973,-3.90075437516705  
"Slc2a9",655.566220921479,1.57373364705053,0.392844242386399,4.0059990  
1246005,6.17559067746642e-05,0.000679907775433317,11.4781103816819  
"Ccn4",621.12357266224,-1.0467055477833,0.4791531159463,-2.18449074617  
019,0.028926206533831,0.0765250932379314,-2.69017621240154  
"Ndr g1",67385.5550768124,0.976773353397267,0.482210879341997,2.0256145  
0859451,0.0428043035838303,0.103227991500003,2.21807180446384  
"4930550C14Rik",177.82206166611,1.13666689487731,0.364027670206485,3.1  
2247388840681,0.00179338013088113,0.00918515849937256,5.33115676938042  
"Man2b1",7223.34402558601,0.138655746903554,0.152893688635077,0.906876  
851107271,0.364471923898824,0.509424628830055,0.0935196087315352  
"Klf5",1134.46463689543,-1.3486351757399,0.418319521295104,-3.22393554  
946844,0.00126441853765337,0.00704188307545427,-6.6836736392718  
"Wdr83",1610.62554684137,0.510496536070168,0.154754014811056,3.2987611  
7717171,0.000971124934888066,0.00574135657381671,2.6341926332276  
"Prdx2",10403.9139296965,0.638086838903734,0.187605355305245,3.4012186



7984808,0.000670861384402846,0.00432126041396984,3.47387757309846  
"Polr2a",4086.5894317513,0.0502877209098323,0.161042968415399,0.312262  
754497413,0.754840843396066,0.840733849225208,0.00872392078865761  
"Shbg",3.88925357819084,0.227095455608036,1.44227315566177,0.157456619  
584544,0.874884993921785,0.92193199002794,0.01845918651648  
"Senp3",2770.27781210303,-0.168405027080512,0.115128611207683,-1.46275  
565486256,0.143534251233639,0.259228494864162,-0.227354429899858  
"Corin",130.154852978982,1.06438279154509,0.427862418888105,2.48767534  
739585,0.012858105022886,0.0410153434016352,3.39943539546857  
"Plekha8",2096.49433627726,1.30980360286499,0.248838623620124,5.263666  
80465383,1.41210269813747e-07,6.00125080604588e-06,15.7484794727249  
"G6pc2",8.44245868802677,-0.0529880517198168,0.798386668844301,-0.0663  
689084344548,0.947084123082857,0.967325627651626,-0.00176026838430208  
"Spc25",396.962117692636,1.57332194063155,0.313585770702569,5.01719812  
447682,5.24304918802567e-07,1.63828482480969e-05,17.3368680854043  
"Dnah2",97.8683614204146,0.509638159113179,0.4889396505867,1.042333462  
83461,0.297257103189486,0.441546881315835,0.416614455386272  
"Ripk4",930.182246401904,-0.407080438478783,0.345997330447071,-1.17654  
213676385,0.239378304689237,0.377617744910325,-0.396444587565377  
"Ufd1",2338.8124377296,-0.215054725848516,0.213236691427049,-1.0085258  
9865891,0.313202060980179,0.458331866180692,-0.167777473116447  
"Zfp287",202.601054691194,-0.21167717748836,0.227617385912848,-0.92996  
9284373599,0.352386988073971,0.497382473828456,-0.147834490620342  
"Prlr",1198.09780869063,1.55423652084378,0.619941085096104,2.507071330  
17783,0.0121736142345787,0.03938950055523,5.02679876429962  
"Letm1",5570.07501616027,0.349956836467811,0.318670771646017,1.0981767  
6299647,0.272127310886717,0.414753162172851,0.307987116974671  
"Ubqln1",5967.66750667123,-0.257049125356887,0.30450080747326,-0.84416  
5660806861,0.398576840419052,0.542888664651811,-0.157018719783282  
"Fgfr4",1532.04697793762,1.23564178066579,0.540834227397482,2.28469597  
165059,0.0223306610059247,0.0627020778072465,3.42193777803004  
"Cadm3",136.206682863243,-1.86578661563463,0.540535533374296,-3.451737  
21325487,0.00055698991218181,0.00375773821588713,-10.4184368592536  
"Fcer1a",0.563895552866122,-2.73001756393547,4.46079526022734,-0.61200  
2435591796,0.540536146127009,NA,NA  
"Txn2",8048.89259367771,0.638663677262851,0.252711190293443,2.52724731  
548789,0.0114960516309166,0.0377993279425989,2.09191985476016  
"Casp14",2.34956105621583,-1.14618403005991,1.19050725778015,-0.962769  
460303092,0.335663229930528,0.480260704334544,-0.840641384479309  
"Slc1a6",7.60445067688432,-0.697238751315212,0.73703393524312,-0.94600  
6307138651,0.34414536928977,0.48868592312373,-0.499247544427607  
"Slc1a3",824.323258064237,-2.75490868261337,0.815094897191959,-3.37986  
250693528,0.000725220995790744,0.00459486064863505,-14.8291688780106  
"Crbn",1241.27003600246,-0.552168340340372,0.252201972361841,-2.189389  
4610315,0.0285685450018579,0.0758379156495882,-1.42412878767615  
"Il5ra",157.144056562968,-0.0246196468321531,0.611887768736738,-0.0402  
355596729464,0.967905328054052,0.980359381846977,-0.000488356751637848  
"Msh6",1102.52882882919,-0.292023283535697,0.10571680847441,-2.7623164  
9204946,0.00573928144830307,0.0220327839494021,-1.1141341684523  
"Fbxo11",2823.64121683748,-0.306748844259631,0.138481667601102,-2.2150

8629678858,0.0267541418186375,0.0721510729156009,-0.806440602122759  
"Mlxipl",10877.1089674466,0.509549210287608,0.41955182095377,1.2145083  
9881769,0.224553644584471,0.360765618938972,0.519499068939991  
"Tb12",1209.47074221012,0.0499441727981427,0.186781120386902,0.2673941  
17214242,0.789165728381001,0.864081834914865,0.007296234243331  
"Bud23",1744.35794889956,0.409823452829904,0.182636483642647,2.2439298  
2527948,0.0248369168057367,0.0680784703095776,1.10123424934482  
"Nid1",4519.67593037298,-1.91352627896326,0.301736979715194,-6.3417028  
9889364,2.27239223753817e-10,4.76420471478701e-08,-32.2611922102985  
"Mcm5",493.012859778121,-1.12436773184137,0.31603748642831,-3.55770369  
062349,0.000374110979555054,0.00274639152084504,-6.63092204774022  
"Hmox1",1582.97414187358,0.280966082344506,0.265993350730367,1.0562898  
7180704,0.290835801791135,0.434471074419518,0.234220605680134  
"Mprip",20910.1969514652,-0.0404291891422449,0.174471301365598,-0.2317  
24007477466,0.816752383572352,0.882761056939136,-0.00504154894212832  
"Cic",4792.88096977151,-0.010235246733568,0.242362871415076,-0.0422310  
838034217,0.966314483364937,0.979577820351957,-0.000211189942947329  
"Pafah1b3",842.253079485756,-0.0860218456815576,0.250694926725756,-0.3  
43133571967573,0.731497975839571,0.824055207587241,-0.0166467541835259  
"Il27ra",312.559374983144,-1.27074089818922,0.40032446329704,-3.174277  
40419234,0.00150210055650524,0.00805277884265582,-6.12717973956666  
"Prkaca",3821.50652883864,-0.883565003116618,0.438020665552624,-2.0171  
7652294299,0.0436770951566555,0.104943438245776,-1.99185041333019  
"Asf1b",110.609636950242,-0.929172969833769,0.408306251973205,-2.27567  
656714388,0.022865374865011,0.0638104910192588,-2.55693317672076  
"Myl10",0.934884730918883,-2.44566854576847,2.66406176971369,-0.918022  
462381307,0.358607106161109,NA,NA  
"Ddx39",1620.49965310941,0.0424803182977454,0.0939853682031689,0.45198  
8635144945,0.651277169746751,0.762404073950657,0.0115240005561544  
"Dnajb1",2410.42046740547,0.0822880074767493,0.153840735359776,0.53489  
088754229,0.59272530986666,0.715645432644754,0.0275311349077008  
"Msh4",274.376427064911,0.392995265788629,0.203301232011971,1.93306878  
615221,0.053227724670079,0.121954662234689,0.826903666985089  
"Usp40",1583.33202777064,0.258203806533638,0.174743280164411,1.4776179  
4496876,0.13951006841852,0.25366924415809,0.354184370940125  
"Evx1",0.368088626729778,3.58761329124359,4.68223370736823,0.766218329  
853531,0.44354640360024,NA,NA  
"Kbtbd4",853.431619435379,-0.0407878719374645,0.108999986275955,-0.374  
20070709185,0.708254997966455,0.806418509783654,-0.00877560969366476  
"Celf1",6965.81828472269,-0.0210690984036863,0.187606739239789,-0.1123  
04592516567,0.91058190054023,0.945143779437498,-0.00118868093431425  
"Ndufs3",8128.43670351836,0.768274551207259,0.300265812767497,2.558648  
09958286,0.0105080050593246,0.0352642138806731,2.569791251717  
"Por",8296.2615974604,0.49683419314495,0.404753287777672,1.22749884472  
305,0.219635155762393,0.355437560372348,0.51392811342525  
"Igf1r",10878.4452131153,1.04682031230814,0.282815052088839,3.70143068  
615495,0.000214387224222619,0.00178714070025336,6.62337690216411  
"Insr",4156.89205379955,0.00239004665101772,0.17389632258394,0.0137440  
896708097,0.989034148292024,0.992699877658699,1.75116295268322e-05  
"Fcer2a",37.9378289311232,-1.8209063117441,0.591521518276603,-3.078343

31547111,0.00208154958435098,0.01029319142675,-8.33296371413481  
"Cyp2a5",1285.66327506081,1.77065256897752,1.05199269710469,1.68314150  
264611,0.0923477018205737,0.185628401040984,2.98179388372218  
"Atp4a",756.920329047407,2.1381106709649,0.713471977753361,2.996768951  
87609,0.00272857429475299,0.0126087597024852,9.35073515044894  
"Trim28",6228.64460540205,0.17198094246927,0.204291952507172,0.8418390  
46318934,0.399878052629417,0.544052911183336,0.104686308581863  
"Ube2m",5494.57149837992,0.506768101003062,0.16747483801174,3.02593575  
858564,0.00247864959137259,0.0117502333412553,2.25201773331777  
"Adcy9",196.538942990947,-0.178233631533205,0.314832684231658,-0.56612  
175437941,0.571311015793835,0.697652795512507,-0.0641701187464459  
"Mef2c",1715.03631462382,0.13963087379381,0.320600032301388,0.43552981  
8233289,0.663177900110637,0.771518060641837,0.0362195781096099  
"Ctr9",3041.02082000495,0.138216100364082,0.11714396745296,1.179882356  
46521,0.238047008078727,0.376221169126936,0.135117031782671  
"Eif4g2",30795.7859561249,-0.0391104318869808,0.217018110170644,-0.180  
217364607165,0.856981926634537,0.90916204940204,-0.00372456185399559  
"Mrvi1",1590.2790423795,-1.24651783742837,0.240108646503088,-5.1914741  
7463928,2.08635530043856e-07,7.99209344753457e-06,-14.630451936609  
"Pcyt1a",2999.93472968006,0.181077918560463,0.172320146022517,1.050822  
68521756,0.293340034835648,0.437340877750839,0.14975910681775  
"Zfp592",2608.91112922945,0.383862787332406,0.162556374406838,2.361413  
31727596,0.0182054274706736,0.053451200846739,1.12432879720628  
"Psm4",5990.87885582103,0.0136710426654051,0.211078559183402,0.064767  
5572464308,0.948359072761074,0.968070006842334,0.000443637272080929  
"Tmod4",42.3720354380674,-0.336440335214969,0.319128733406258,-1.05424  
645290925,0.291770097351728,0.435599797715466,-0.279592466743587  
"Insrr",1363.14657056631,1.85993002170482,0.642061991528101,2.89680754  
544932,0.00376980939215205,0.0160558635928748,7.68463783561221  
"Cabp5",0.844712349308926,-0.509287207772745,2.0927946776744,-0.243352  
686819085,0.807732192639427,NA,NA  
"Snx6",4319.91536650757,0.457029844681688,0.158699727469119,2.87984013  
564623,0.00397876861552498,0.0167206020153349,1.86976104347139  
"Mthfd2",546.042292322314,-0.689206564355404,0.185447428678172,-3.7164  
5252386575,0.000202039584423563,0.00170683180983129,-4.39239363740302  
"Kit",1770.41689714236,-0.225539047870489,0.202717257462003,-1.1125794  
1575479,0.265889105058049,0.407635301967436,-0.202394765766301  
"Tomm40l",2681.44320160637,-0.349810507941808,0.2545439939774,-1.37426  
345236363,0.169359908186496,0.293709818537783,-0.428574895132258  
"Nr1i3",13.6710483514615,2.03809911769526,0.563062454253902,3.61966794  
677489,0.000294981305497145,0.00227874227202192,12.4000632933906  
"Apoa2",116.749438810734,1.53996241499135,0.448073066314537,3.43685557  
281484,0.000588509324214011,0.00390696452282083,8.53908318811401  
"Pan2",3208.13327671675,0.206743591608454,0.174341178346042,1.18585633  
967724,0.235679037711138,0.373547375204309,0.203582573310061  
"Cs",12357.5627186041,-0.954990391721098,0.509211967556296,-1.87542801  
930616,0.060733863446048,0.134842731663749,-1.91346280281228  
"Ampd3",1511.86793555733,0.0157234268916476,0.183653548729026,0.085614  
6096847112,0.931772784255269,0.957426856800689,0.000684062633759731  
"Bcas2",2659.9894254202,-0.0472628607629501,0.171029495179568,-0.27634

3333138695,0.78228437615324,0.859226045867275,-0.00717087444203933  
"Sh2d1a",45.512256150394,-1.39180039774668,0.519405753311082,-2.679601  
42696592,0.00737098686648343,0.026783358539451,-5.03828199674832  
"Ctcf",3158.63919168242,-0.246906932835181,0.11544968872414,-2.1386539  
5016482,0.0324637046991593,0.0835393050315702,-0.612931162147506  
"Pard6a",362.564501648658,0.163674820483988,0.209653683944359,0.780691  
363989707,0.434984041110033,0.577061585576321,0.0899894448459034  
"Agrp",9.29330895520619,-0.0477386401133757,0.655139929938553,-0.07286  
78530063848,0.941911275499327,0.963859874550535,-0.00175722846938413  
"Pvalb",451.695807467871,2.36751563459729,1.16189939422038,2.037625328  
29778,0.0415874170384403,0.100804507386314,5.43243557765087  
"Tfap4",391.303096126504,-0.0783855929663292,0.155596120323246,-0.5037  
76011917815,0.614418786363628,0.733795019999878,-0.0242623440630072  
"Ranbp1",2410.53789111109,-0.142338658416987,0.14956525466114,-0.95168  
2653430931,0.341257949326892,0.48578867605868,-0.102765888441268  
"Cd247",191.379591078322,-1.32086988241805,0.452687120840204,-2.917842  
85792462,0.00352461925527721,0.015305796489843,-5.5206069343112  
"Rfx5",1253.48953262574,-0.466400855599387,0.191238283558912,-2.438846  
69387188,0.0147342175719901,0.0456374542047123,-1.43979181739576  
"Psemb4",7609.09951873991,0.291812409252185,0.226268305715034,1.2896742  
5786844,0.197163780995339,0.328218360386058,0.325101248111098  
"Mmp8",9.51441072624963,-1.37308847070201,0.688627862133937,-1.9939484  
6796796,0.0461576864107839,0.109240636651976,-3.04029544998565  
"Slc30a4",1163.98984544284,-0.304428190800334,0.221809499200717,-1.372  
47589439285,0.169915338048843,0.294412485406923,-0.372246719296819  
"Sqor",3268.30798406351,0.279919075947062,0.407758094411539,0.68648318  
6436877,0.492408463315245,0.628830247427342,0.129852761793142  
"Bloc1s6",1245.53349520422,-0.469819826608736,0.19891011725964,-2.3619  
7048738086,0.0181780892711558,0.0534191988860581,-1.37637714865034  
"Metap1",2086.73919983654,-0.083454321367002,0.127912339184588,-0.6524  
33704981114,0.514121427035993,0.647901830040152,-0.0362205183332828  
"Gpr108",2481.97878951289,-0.345122138371297,0.157742126809819,-2.1878  
8820305049,0.0286777468212572,0.0760760146286903,-0.88904230605649  
"Tnfsf14",73.0224662625241,-0.967294449427689,0.409569430523043,-2.361  
73497663729,0.0181896404907819,0.0534338828499583,-2.83350552026284  
"Gata6",366.675178216462,-1.33484538168417,0.393742830531911,-3.390145  
23738987,0.000698556038922809,0.00445403716380541,-7.22677863400381  
"Rsl1d1",2549.63299269928,0.0893808586779726,0.138738149932617,0.64424  
1390860291,0.519418914531765,0.652763776702569,0.0381245084208075  
"Cnga2",2.68523012301978,0.144116495994778,1.27215496122844,0.11328533  
1101184,0.909804346457308,0.944789366596963,0.00818484689880302  
"Apc",2562.4666108545,-0.225175958192107,0.196312804605129,-1.14702634  
21942,0.251370734013291,0.391377990241248,-0.211233391396318  
"Reep5",7087.65219454965,0.327765639560229,0.288752765934483,1.1351082  
2484934,0.256329975834447,0.397171877473188,0.302654252424937  
"Ergic3",5586.59356529027,0.289234165240691,0.1424878948799,2.02988587  
545967,0.0423681411379761,0.102416813278981,0.659079161400127  
"Uqcc1",2463.2694972,-0.0111822519802644,0.310019822265195,-0.03606947  
41986495,0.971226962542899,0.982455677427184,-0.000197926400038271  
"Spo11",31.7102885844178,-0.191830795105066,0.606359065097023,-0.31636

501562712,0.75172546779547,0.838578454495305,-0.0337712622295153  
"Ncoa2",2276.30485556556,0.0814007323873271,0.148282575069617,0.548956  
830221693,0.583035076072482,0.707274181127434,0.0281920756059092  
"Trh",2.09303786160215,-2.83992320799143,1.54306942737483,-1.840437738  
96998,0.0657039971495863,0.142931667569188,-5.52475426805096  
"Nr2c2",2541.18113447906,-0.0335254447385188,0.119987916329059,-0.2794  
068416571,0.779932621199678,0.857560832806142,-0.0051516257926827  
"Nr2c1",586.431454376818,-0.440536661861285,0.174560786276394,-2.52368  
628291898,0.0116131513698573,0.0380944188104775,-1.43953614127073  
"Smpd4",1815.64172989826,-0.00262859003404084,0.176900158000542,-0.014  
8591729015459,0.988144531628556,0.992215577180636,-2.05421146354075e-0  
5  
"Pex1",1065.70807372016,0.566202857609125,0.14578402171736,3.883847152  
37762,0.000102816556202106,0.00101197234367928,3.90445226133147  
"Otx1",1.12617497935245,-1.16999530366026,1.45782972044046,-0.80255964  
5516601,0.42222930077683,NA,NA  
"Kctd20",2877.51546313495,-0.270535221906668,0.100719341754794,-2.6860  
3048027556,0.00723064923449504,0.0264211392005593,-0.983014310154878  
"Itgae",218.164636963363,-1.12555127815375,0.314780162151987,-3.575674  
11637044,0.000349326586029701,0.00260067574433261,-6.69926316054596  
"Ctns",1363.05235553412,0.324065422667813,0.135448310582441,2.39253942  
167533,0.0167322305005624,0.0501529639200561,0.969823352488938  
"P2rx5",600.711273881353,0.0360833454928548,0.418484807211098,0.086223  
7884651642,0.931288520665122,0.957159009853384,0.00157993623069439  
"Shpk",808.625422571217,0.564207783152024,0.296307458849053,1.90412953  
26941,0.0568933163124392,0.128391884428234,1.1581313154897  
"Trpv1",25.1533838601387,-2.95356657419427,1.1654976922768,-2.53416767  
254551,0.0112714783961257,0.0372367478427073,-9.71859018892521  
"Ephb3",632.540208010509,-0.0649246031670734,0.168234409610401,-0.3859  
17502355353,0.699557767854714,0.799811033049795,-0.0145028440851883  
"Tuft1",1389.21139725339,0.398279770015816,0.24941946966969,1.59682710  
633322,0.110304251937773,0.21222738348951,0.617372282821911  
"Rcn1",2353.20114715678,-1.14944266689846,0.208230670459073,-5.5200449  
7879374,3.38912900509801e-08,1.9992397084915e-06,-15.0838413953584  
"Dnase1",15113.3215882893,2.1578551994282,1.11079206842521,1.942627482  
46613,0.0520611838684192,0.119944341612482,4.57622278410184  
"Trap1",7658.93232460543,0.666341686764338,0.220789585541342,3.0179941  
917576,0.00254453781535688,0.0119897047665124,2.94770033985675  
"Naa60",2193.55609615941,-0.0271934742390873,0.146934383268028,-0.1850  
72231796712,0.853172381164339,0.90649856072924,-0.00266947014632954  
"1700037C18Rik",392.823051958222,1.08045296808921,0.219676782127954,4.  
91837579567188,8.72652600092833e-07,2.48393874403066e-05,11.4561292151  
993  
"Ankrd13d",328.362388641161,-0.494851023309733,0.251081229576959,-1.97  
088019739069,0.0487375806920075,0.114175819816504,-1.0738345093326  
"Tpr",4654.41743103202,0.0923173110016588,0.119916131584602,0.76984897  
5127487,0.441389484264244,0.583076704890531,0.0497993300908195  
"Odr4",3385.68254349025,0.453534697844628,0.155506753196472,2.91649519  
086556,0.00353988180243723,0.0153459361383661,1.89437115964882  
"Prg4",23.5263459198785,-2.04850832114598,0.702952034451567,-2.9141509

2459929,0.00356657433476318,0.0154158870270921,-8.54710736995649  
"Dhx34",1134.97628963748,0.112478683846594,0.132825745458909,0.8468138  
72250317,0.397098874776257,0.541632309226125,0.0689683188210452  
"Kptn",1087.6843449911,0.253092469298363,0.133949974801149,1.889455146  
77463,0.0588308674686224,0.131564182111945,0.513337450615676  
"Napa",5683.8548209008,-0.078001906456742,0.147686529407341,-0.5281585  
71873547,0.597389280671077,0.719583381387821,-0.0256690913521118  
"Sra1",3095.66480387156,0.543182984441283,0.138641149339469,3.91790595  
381804,8.93215395188997e-05,0.000905193023669182,3.80627999497774  
"Calcoco2",0.298287120533201,1.99349616271065,3.17705116310352,0.62746  
7440833812,0.530352872256066,NA,NA  
"Atp5g1",9800.74340600864,1.64905235943001,0.392885579124982,4.1972840  
1104135,2.70135081974592e-05,0.000359528588965228,13.0781673494966  
"Snf8",2992.69527096122,0.650073827707314,0.135778171321531,4.78776390  
47583,1.68649885467216e-06,4.10528772389486e-05,6.56616796954037  
"Tbcb",3246.02348355156,0.622044574651323,0.223588929981914,2.78209021  
663836,0.00540100240396274,0.0210701770453112,2.40102776890262  
"Inpp5k",2769.12345340968,0.174865484311662,0.104080923978906,1.680091  
58284473,0.0929394983242521,0.186632904748982,0.293531242242817  
"Crkl",1858.5831383958,-0.168882525477014,0.0835614243200895,-2.021058  
4830399,0.0432737114161678,0.104218234337011,-0.381888679555865  
"Upk3bl",28.8948914266259,-0.369347143739109,0.802333809603271,-0.4603  
40994382051,0.645271480554548,0.758044543758034,-0.102314008422794  
"Eps8l1",993.016972633263,-0.225518077551972,0.218548949357521,-1.0318  
8817981024,0.302124503874881,0.446722005254968,-0.181726704379991  
"Clint1",5185.9717814568,-0.0454589509906999,0.188202094374301,-0.2415  
4327900459,0.809134077449628,0.87822551595972,-0.00590292963243225  
"Prss16",12.404636444543,-1.34513574047552,0.774736320142768,-1.736249  
74782083,0.0825196844467903,0.170225222952128,-2.38174156727636  
"Cdkal1",673.769428378952,0.350481633548126,0.107423470854803,3.262616  
91936809,0.00110388626973139,0.00634913701687985,1.77323952665269  
"Rhox6",38.1236969082448,3.29379109400224,1.05837942699347,3.112108011  
54639,0.00185756521585473,0.00943198087987904,15.361086012447  
"Cdcp3",0.67236877356297,-0.582213968803036,2.67747673524742,-0.217448  
749839179,0.827858643064142,NA,NA  
"Htra1",4729.15523698929,-0.0938004024797457,0.275338874398555,-0.3406  
7257187944,0.733350089259897,0.825547164060294,-0.0179823704146145  
"Zbtb17",1465.59413403867,0.231898137581788,0.177451726671163,1.306823  
78769703,0.191272564321491,0.321032319802051,0.263485789021215  
"Clcnkb",7705.02247542943,1.52920188746785,0.518701294481949,2.9481358  
6111278,0.00319696529291175,0.0141701362312329,6.50922921457811  
"Fam131c",149.527665236861,0.576312665485208,0.48731425766501,1.182630  
4205558,0.236955650789815,0.375073979469055,0.565150638255616  
"Fblim1",2532.12479986659,-1.41685127872183,0.335634622876858,-4.22140  
977762494,2.42779127451369e-05,0.000333829860863666,-11.3417231794789  
"Hspb7",346.583533122426,0.536621501044426,0.26693040019835,2.01034239  
878888,0.0443949623679681,0.106215986002291,1.20325601040566  
"Epor",226.724046550314,-0.241470358447344,0.386030552949899,-0.625521  
36508916,0.531628930512356,0.663914743299168,-0.0989066298139671  
"Ccdc159",161.558243683315,-0.329745402997277,0.200674440815971,-1.643

18585693567,0.100344485183889,0.197867796532713,-0.534239047735699  
"Mob1b",2255.38251135487,-0.181970441661651,0.246621642612928,-0.73785  
2686948701,0.46060397260912,0.600003758547076,-0.0929540244649037  
"Atp6v1b1",4457.4380342443,0.966483699440483,0.507091311112928,1.90593  
622540941,0.0566584803839813,0.128010086967192,1.98674855739262  
"Vax1",0.200706703775918,0,4.7847199059619,0,1,NA,NA  
"Atp6v1b2",10665.4378854212,0.525085452039922,0.26999127905778,1.94482  
375087215,0.0517961945309053,0.119475003071524,1.11562181263995  
"Eps15l1",2445.96442304643,0.0120055413939508,0.174106866031217,0.0689  
550140532548,0.945025427805743,0.966083248118092,0.000414254450976134  
"Tep1",2131.55766025849,-0.0725679660409027,0.206535297913668,-0.35135  
8662533493,0.725319290361154,0.819137146850748,-0.0144775815492332  
"Ttc5",2217.94627336704,-0.0841799517267792,0.105593950542803,-0.79720  
4302841726,0.425332387471471,0.568334079695637,-0.0475655336126868  
"Osgep",1624.40324507211,-0.425024254582659,0.223369644524722,-1.90278  
430843641,0.0570686955556849,0.128728068711794,-0.871322288153639  
"Aamp",9337.85446218574,0.428411756237388,0.174666752374141,2.45273785  
888981,0.014177361348944,0.0443846303478797,1.33444351391259  
"Tmbim1",3606.22054499155,-1.10114978062736,0.213313865902238,-5.16211  
065778547,2.44180866531679e-07,9.08595140388295e-06,-12.7830068046737  
"Arpc2",9832.18832442229,-0.149192727773322,0.141263606421818,-1.05612  
996547623,0.290908841785766,0.434513604806103,-0.124356319480648  
"Kmt2b",3673.45219705164,-0.0954116530039527,0.140675363415178,-0.6782  
39961053893,0.497619559183334,0.633286741397862,-0.0435870935378306  
"Zbtb32",61.9353903091003,-0.156213963707883,0.474213314984665,-0.3294  
17076180019,0.741840462487895,0.831876263309317,-0.0287545497438917  
"Etv2",0.20907454716973,-0.379137285725014,4.77099592825755,-0.0794671  
157607719,0.936661086691445,NA,NA  
"Upk1a",2436.79002314025,-2.61859010891638,0.715207538405399,-3.661301  
04662305,0.000250937687382032,0.00201681081144883,-16.2515929727279  
"Tmem147",3574.30197319378,0.513495299683354,0.265764595004769,1.93214  
336798376,0.0533418128126105,0.122129951411494,1.07971096955399  
"Rps9",21129.8839215684,-0.370468077255249,0.239648156455373,-1.545883  
27627814,0.122132760171201,0.229685162446472,-0.544975496755145  
"Tfpt",904.240614542147,0.120546960726653,0.125053988631871,0.96395934  
3044343,0.335066309870042,0.479741732254816,0.0885426320115573  
"Susd2",6520.00091919272,1.79088878526537,0.547979050173287,3.26817016  
946001,0.00108245261793084,0.00625306630637711,9.08819345824273  
"Ggt5",1063.09426857073,-0.651296367047759,0.197124456794844,-3.303985  
6019773,0.000953207275897906,0.00566017275552232,-3.37000335542289  
"Ggt1",24904.8497490876,2.24942671041528,0.775596202577342,2.900254930  
25925,0.00372859276112864,0.0159255425315413,9.31224645092581  
"Crip2",4486.65268319288,-0.328361537338158,0.128479818236327,-2.55574  
409931191,0.0105961012345063,0.0354860956929263,-1.09627253392728  
"Crip1",3169.58137524555,-1.08279400292068,0.262376338179871,-4.126873  
67478381,3.67728259972097e-05,0.000457268215110711,-8.32694622432706  
"Cbfa2t3",1557.72006006171,-0.889420224485589,0.231063463015447,-3.849  
24649219046,0.000118481733921842,0.0011368882126024,-6.029789179207  
"Fb1n1",3158.19804914361,-2.07347855115519,0.377564536649004,-5.491719  
56020531,3.98039084484788e-08,2.26182406888254e-06,-26.9538505129495

"Pgrmc1",10518.9104340437,-0.0625665993790892,0.230346209471645,-0.271619834867701,0.785914346638618,0.861562910759012,-0.00932287384979068  
"Gcat",1522.87672447168,0.483927092488458,0.448169815580684,1.07978510748531,0.280237884422584,0.424080541025407,0.415128090697574  
"Tek",2172.45613261828,-0.563207263533664,0.194506284739188,-2.89557360210167,0.00378466265393985,0.0161120856826461,-2.32502412926047  
"Mpl",4.87869479956514,-0.627953532835766,0.708365590964286,-0.886482264025477,0.375357707302487,0.520471667594186,-0.41006610641252  
"Elov11",3233.14979596318,0.238400931282859,0.11531218478875,2.06743920184676,0.0386927875421019,0.0956187543087328,0.559619080808088  
"Med8",1798.20706516685,-0.154317285836289,0.216014873746266,-0.714382686525339,0.474990574902907,0.612564735065605,-0.075631002441045  
"Hyi",4443.73789284844,1.40524453639269,0.331500717978266,4.23903919413176,2.24478468085589e-05,0.000313979997900489,11.3349571663014  
"Cdc20",213.000447436731,-0.802701793277965,0.379286845278313,-2.11634493331547,0.0343154817965797,0.0871542613090676,-1.95865306944721  
"Adamts4",164.104514532019,-2.41629045377276,0.361958066427646,-6.6756088008216,2.46207924392882e-11,8.2768312238145e-09,-44.9666957247347  
"Nectin4",685.346805612729,-1.52784654030849,0.333668053078805,-4.57894163439028,4.67334568148353e-06,9.41331550594689e-05,-14.1643600647208  
"Pfdn2",4287.00040534468,0.566496394873329,0.148108647245005,3.82487049480789,0.000130840846341418,0.00122551055809493,3.79801714933507  
"Rnf114",3942.49252140136,0.0334214853884321,0.120771963713428,0.276732151741243,0.781985782091607,0.859027182131512,0.0050785522394039  
"C330007P06Rik",2108.34489262559,-0.511241317793621,0.260790627827563,-1.96035157418179,0.0499547117978352,0.116300533807068,-1.09997538266818  
"Neurl1a",332.893122796398,-0.758304563074309,0.246206362037764,-3.07995519205144,0.00207031739327281,0.0102532508341461,-3.47315658335366  
"Srm",896.762142244363,-0.0451351545556325,0.180317877653652,-0.250308816535244,0.802348538840378,0.874026024376205,-0.0060772286441973  
"Epha2",828.320174076069,-0.979591775272274,0.169927122449284,-5.76477587069504,8.17664292452396e-09,6.81317024540035e-07,-13.9094568688274  
"Rbm14",1592.92296267098,-0.0916032875352228,0.11466970999688,-0.798844677794296,0.424380480617661,0.567489926005292,-0.0518962194634362  
"Actn3",52.8991795808222,0.168465802762964,0.378950873511893,0.444558423105671,0.656638899442185,0.766196604507704,0.0448652193101779  
"Zdhhc24",681.032787541873,0.155589857609342,0.0934836100859247,1.66435439823444,0.0960416274081811,0.191318372205868,0.257317053276643  
"Bbs1",790.948627159953,0.449481944549184,0.198692265554636,2.26220151697644,0.0236849556408182,0.0655782710532579,1.22461844462292  
"Slc34a3",1346.98694478188,1.46314171028932,1.11493840847974,1.31230720832765,0.189416500992175,0.318716006395577,1.67303646262606  
"Ndor1",1325.14861959588,-0.152479565233182,0.178942804013156,-0.852113422912337,0.394151142621852,0.538591280316832,-0.0943540939624438  
"Nsmf",3597.70013643847,0.133821653545497,0.190728276328843,0.701635101628926,0.482906755227858,0.620516403943111,0.0638601263909808  
"Pdk1",2344.46935165414,-0.546246938490542,0.431968433455142,-1.26455290753848,0.206031643463303,0.339061865652218,-0.590805772689947  
"Ptbp1",8905.76147925995,-0.0656131004549713,0.0849212457015413,-0.772



634691271144,0.439738607503107,0.581565717228216,-0.0355643541444335  
"Mvd",2051.03393097076,0.303172633766475,0.398851284644557,0.760114472  
331842,0.4471861626093,0.588144067356231,0.160918985749472  
"Cyba",14937.4078460609,1.25351804996933,0.432606688442859,2.897592856  
18374,0.00376038403322528,0.0160262224873938,5.18145320257172  
"Itih3",127.324983789607,-0.490005807703935,0.423962337315843,-1.15577  
673905239,0.247772489874602,0.387073792771012,-0.465084075639545  
"Stimate",1342.0995276179,-0.943619005058364,0.318203431104077,-2.9654  
5829749311,0.00302232318095941,0.0136063859114169,-4.05493472808775  
"Sfmbt1",1057.99867900348,-0.195369877334085,0.158429777981184,-1.2331  
6386492247,0.217514633999276,0.352925050654729,-0.203477642391103  
"Itih1",129.98847683274,1.74246911027055,0.537762520939865,3.240220436  
38366,0.00119437326942039,0.00673449682104072,8.71323801435048  
"Ihh",695.654412419079,1.14870980778798,0.51397695862318,2.23494417116  
499,0.0254210141870597,0.0693714394148761,3.06507944266277  
"Prkag3",400.853203314729,2.67616724213646,0.482182387471483,5.5501140  
4744585,2.85483298976314e-08,1.77036571606925e-06,35.4440271395651  
"Cryba2",0.79578460614054,0.101226521582596,1.97068543305052,0.0513661  
489981699,0.959033758334948,NA,NA  
"Atp7b",102.878437126036,1.18038332190653,0.398942396714083,2.95878134  
695343,0.00308858161903737,0.013815362332643,5.05437080476805  
"Defb2",20.3661398181944,1.07608109583528,0.676180176078053,1.59141177  
73708,0.111516935546148,0.214102370413237,1.65856488192323  
"Slc4a1",1436.8185476133,1.30348623556983,0.579226382183781,2.25039168  
736663,0.0244240922225138,0.0671665624176732,3.5201685170096  
"Rundc3a",392.829393952541,0.961552567294491,0.460778649516058,2.08679  
930874484,0.0369062796592462,0.0921499091811989,2.29266688330291  
"Slc4a3",2260.31415012987,0.458978327417615,0.266909530627403,1.719602  
61718168,0.085504700119983,0.174998482457496,0.799989116502566  
"Cdt1",275.816628864439,-0.356396355888469,0.281243849970214,-1.267214  
75305581,0.205078511987531,0.337778410773179,-0.386820197782999  
"Runx1t1",256.031281009059,-0.274163565218557,0.243627927167265,-1.125  
33718283589,0.260446179036163,0.401890694055215,-0.249920688337759  
"Snai3",32.9365752426737,-0.781296375604568,0.407506585594375,-1.91726  
073448604,0.0552048156400013,0.125321166066916,-1.622655307159  
"Aprt",3211.45302604481,0.863569216149353,0.249702877228548,3.45838712  
686897,0.000543419923445399,0.00369178517040818,4.83740831297134  
"Gtf2h1",2371.92578494498,0.245942221657086,0.10771088703722,2.2833552  
709681,0.0224094497462541,0.0628780329763221,0.68041352256857  
"Hfe",1436.60598469451,-1.00180444556985,0.169882271402992,-5.89705115  
95844,3.7005515377099e-09,3.8584681220464e-07,-14.7944731429545  
"Abhd1",282.035330750956,0.605347452383397,0.189978878908896,3.1863934  
341548,0.00144058547625593,0.00779580021267317,2.93845951834226  
"Slc5a6",749.582489114925,-0.0559093539732508,0.409805129911812,-0.136  
429121776202,0.891482053056915,0.932817273290959,-0.00388826890551844  
"Tcf23",47.247554479964,-0.776871610818075,0.308456731304631,-2.518575  
64440971,0.0117830570459521,0.0385027729649695,-2.53029027004712  
"Nphs1",2522.54597200942,-0.239678657530772,0.496872127807483,-0.48237  
49293171,0.629539627549683,0.745550640027836,-0.0703773761731278  
"Aplp1",893.277179646623,-0.641330547095222,0.359513263354822,-1.78388

563779429,0.0744422501316901,0.157359711955742,-1.18596187418882  
"Qrich1",2944.31373518361,-0.0504211691370107,0.120266345276312,-0.419  
245874821988,0.67503644845469,0.780702335368026,-0.0124823319177698  
"P4htm",302.008183793169,-0.00606709012712123,0.243942041898355,-0.024  
8710311675149,0.980157833863415,0.987144496108929,-7.85011749409489e-0  
5  
"Usp19",7478.61905811862,-0.156933897617121,0.112880107207778,-1.39027  
062871454,0.164446713262607,0.287053000465024,-0.195867378699043  
"Pola1",301.052486499885,-0.379546324104199,0.209224409600151,-1.81406  
330566089,0.0696679800475979,0.149536137711147,-0.721220450049183  
"Cdc42",14686.3877370842,-0.592868557187491,0.212895704207173,-2.78478  
403026188,0.0053563386298756,0.0209546329464916,-2.29167146136308  
"Pknx1",1476.41554102967,0.0530041911772829,0.131554135712252,0.40290  
7828707253,0.687016031898694,0.789937666544033,0.0124984539911731  
"D130043K22Rik",58.2894077379557,1.62550373633659,0.652269938956096,2.  
49207213034848,0.0127000243290632,0.0405903875923665,5.20847808278326  
"Gmn",532.121241019625,0.605341676056455,0.192863883602029,3.13869898  
682309,0.00169699672367343,0.00885417236237209,2.8613692760976  
"Acot13",3772.27958261757,1.36370551694681,0.303529822044327,4.4928221  
8057526,7.02854701773984e-06,0.000128557795264438,12.217617716567  
"Zfp184",89.6284740068262,-0.416213345800723,0.288519306673953,-1.4425  
840357057,0.149137683161929,0.26682754141047,-0.54988140289241  
"Cyp27b1",211.344440161635,0.808953184642276,0.524945795551437,1.54102  
231410864,0.123311355274003,0.23116285021945,1.18481939825684  
"Cdk4",4544.51473715128,0.0410193740460181,0.203418175689987,0.2016504  
86279714,0.840189973530155,0.897743539231201,0.00442479443820844  
"B4galnt1",2491.37665150401,-0.557951153368868,0.340578655863911,-1.63  
824462796581,0.10137067341884,0.199402496612887,-0.899657122937214  
"Mettl1",1859.59249668215,0.843388717604322,0.200826512299291,4.199588  
53016092,2.67400465577038e-05,0.000356695249868367,6.69534994846814  
"Tspan31",4914.17377676164,0.295795316032491,0.0643425035050563,4.5971  
9936152696,4.28207851371746e-06,8.81646957343854e-05,2.76163497752579  
"Kif5b",11061.6158096673,1.06966741494478,0.292625950441569,3.65540859  
698417,0.000256772683787204,0.0020485080967606,6.62192963853239  
"Saal1",544.968319747668,-0.0637910073198723,0.107528840182717,-0.5932  
4556287854,0.553016824265612,0.682710018964854,-0.0243480756788441  
"Tph2",1.17641198223534,-4.13141531381602,2.18224417317878,-1.89319571  
319921,0.0583318472874831,NA,NA  
"Krt23",159.830737514504,-0.941536408961742,0.46108410796144,-2.042005  
77010666,0.041150958971107,0.1000374783652,-2.1676148934415  
"Cnp",1144.73751784579,-1.02728467465138,0.236856447849603,-4.33716153  
382353,1.4433455150276e-05,0.000225021719382461,-8.6284861695147  
"Ttc25",375.208369151217,-1.94477133206516,0.65642424599702,-2.9626744  
3490195,0.00304978951707226,0.0136994265323637,-8.3438494629165  
"Sulf2",1737.25007274829,-1.5438525986321,0.314005519977636,-4.9166415  
8879134,8.80415270663555e-07,2.50238147921254e-05,-16.3581721083224  
"Sod2",12521.0690607329,0.668057410009941,0.408786141273665,1.63424671  
865944,0.102207056419322,0.200647723123634,1.0730368381485  
"Tmco6",896.53432127605,-0.0631010970519403,0.106295429424379,-0.59363  
8855345438,0.552753687125629,0.682514811701318,-0.0241027922991031

"Stambp",1003.09238671534,0.0513918176035395,0.139644139377575,0.368019867017722,0.712858420467321,0.80951155982946,0.0108603360653165  
"Ezh1",3178.37613366503,-0.155011831895186,0.131852645748743,-1.17564445533065,0.239736983099408,0.377942407541418,-0.150828598268918  
"Hap1",839.462317023448,-0.108536983639736,0.314766599293963,-0.344817346831556,0.73023169111352,0.823104261378854,-0.0211291552877464  
"P3h4",472.871845469495,-0.971079424475127,0.200635394277099,-4.84002051569207,1.29825725626383e-06,3.37512266435095e-05,-9.99871326983566  
"Ctnnb1",21585.7516909112,-0.22870312085297,0.150705107996064,-1.51755387653444,0.129126901788197,0.238963205302416,-0.327376097003228  
"Eif1b",2245.93514253354,0.268207686267764,0.163027387165,1.64516950760126,0.0999348598190363,0.197226582445181,0.43540890676888  
"Chrd",569.082106285244,0.0889561451061094,0.234895804543824,0.378704699638486,0.704907163064536,0.804041176168967,0.0194017619679634  
"Psm2",7917.73204997305,0.144697326295424,0.178764973578701,0.809427727360258,0.418269158682396,0.561310141756832,0.0835600563628261  
"Syngr3",57.2381804547006,0.238098201477604,0.403210468607429,0.590506001245271,0.554851463561592,0.684411579459981,0.0902858422656291  
"Vars",4295.78847460473,-0.360496763175828,0.21085485383484,-1.7096915561555,0.0873229249926744,0.177805056299309,-0.622602250089223  
"Vwa7",148.951217623299,-1.72929347975264,0.374566503748034,-4.61678623808793,3.89728343878499e-06,8.21505216101943e-05,-16.2673900339042  
"Hspa1l",30.2365786685121,-0.465083052503695,0.383906201268468,-1.21144970038778,0.22572310121136,0.361863846560386,-0.472750994167626  
"Slc44a4",3073.14584922632,1.59920408274393,0.471145499247269,3.39428920641058,0.000688069875348435,0.00440590687341339,8.67537696819128  
"Msh5",121.618722325856,-0.0312790862148618,0.469847656099214,-0.066572825912442,0.946921779519692,0.967309892988783,-0.00103960317073041  
"Abhd16a",3304.62071047955,-0.184909433949587,0.147471505504099,-1.25386550654321,0.209890894340642,0.343643686107467,-0.19751100348124  
"Neu1",13869.9518748998,1.60862167567761,0.368859033993517,4.36107436020094,1.29425368478589e-05,0.000207186850130996,13.6441513232635  
"Ddah2",2312.033282108,-0.237833428925038,0.198612976514369,-1.19747175184111,0.231122731468178,0.36805219031089,-0.237721773115787  
"Clic1",7711.34464787892,-0.208893625752741,0.248478173653887,-0.840692052267397,0.400520474174268,0.544660915431013,-0.126922064831438  
"Lsm2",792.174190472324,0.115801765521964,0.118068056312721,0.980805216402018,0.326688805381339,0.471602570453051,0.0870387678086785  
"Pole",198.975559543456,-0.361772665027337,0.376022162612672,-0.96210463371008,0.335997046735881,0.480533833473155,-0.265127861506708  
"Atp1a2",7149.20931869272,-2.45200916940941,0.674758252214923,-3.63390764227126,0.000279160825958378,0.00218246903950941,-15.0241919981706  
"Atp1a4",5.90876566292041,-1.3225215251789,0.814878817258898,-1.62296711752505,0.104596434333221,0.203982924247763,-2.10243758763712  
"Casq1",47.3045564861276,-1.08745461629089,0.379513316008737,-2.86539251831114,0.00416492632710835,0.0172855967488205,-4.41276216758236  
"Stx1a",568.531696062731,-0.542318572472524,0.327262019601205,-1.65713874507461,0.0974914273704518,0.193474590419244,-0.890817417251842  
"Zfp775",361.692154471427,0.194613780303127,0.13711215837282,1.41937653533215,0.155789269595407,0.276068270341839,0.250488775961401

"Scube2",125.512990448099,-2.14624079697139,0.642254152496221,-3.34173  
128913171,0.000832576190765465,0.00511615838876301,-11.3221744708465  
"Mrpl49",1808.44823088943,0.564255744933013,0.172494238859263,3.271157  
04654569,0.00107108412373372,0.0062099310866964,2.86732508571339  
"Dennd2c",194.969870911691,-0.617895666595196,0.222622522844711,-2.775  
53078951588,0.00551116807587441,0.0213674199927221,-2.3763574968322  
"Mark3",5103.78193321273,0.764104708855682,0.220090715035665,3.4717716  
6802272,0.000517035894476224,0.00355220784725067,4.30969263558277  
"Gatad1",3572.7320067908,0.479051495432325,0.227655415036305,2.1042833  
3257932,0.0353537390862152,0.0890948952698751,1.15837201983861  
"Pcdha11",6.59913695018835,-4.16025760933107,1.96679228272698,-2.11525  
011861589,0.0344086353868635,0.0873068293858363,-10.1440667511779  
"M6pr",8944.42102341302,0.0990486461942884,0.139941987265613,0.7077836  
18981283,0.479079640498125,0.616492531047548,0.0479107286879592  
"Lrrc8a",1957.73584243127,-0.307589691693454,0.127280735824292,-2.4166  
2408455961,0.0156651859123838,0.0476883387922014,-0.936016465034104  
"Mc5r",60.5383581409514,-2.20352980272062,1.09171405312007,-2.01841296  
850858,0.0435482698740296,0.104697153111922,-4.97266902228036  
"Ppp2r1a",6719.72790750497,0.20195679945122,0.108314159146726,1.864546  
62107141,0.0622449809169863,0.137241520614378,0.40108882532919  
"Fance",789.938999174693,-0.000852143812690462,0.14051999208491,-0.006  
06421762517284,0.995161484039402,0.996930467424169,-2.61970588870379e-  
06  
"Tinf2",979.062897944583,-0.176531772428672,0.110794168513388,-1.59333  
090177341,0.111085977837214,0.213415547922949,-0.272655808903933  
"Tssk4",68.2810618174108,0.222037755232383,0.279423486473602,0.7946281  
03866849,0.42682986536954,0.569827368365305,0.12487887985923  
"Hapl n4",15.1361989603254,-2.75392574486657,0.888482819491763,-3.09958  
243924389,0.00193793638372728,0.0097523021685984,-12.7513699181023  
"Dus3l",2426.02236417277,0.20683179570835,0.148232431351296,1.39532080  
6809,0.162919120407235,0.285152334802537,0.259518417558191  
"Gtpbp3",1038.20030465148,-0.374056585153388,0.124368183421977,-3.0076  
5497140235,0.00263271853916567,0.012286439941755,-1.6455718243688  
"Tgfr1",3320.04443058406,-0.245593949790084,0.209235112210488,-1.1737  
7024914929,0.240487063573886,0.378817175930462,-0.238398434041837  
"Homer1",782.413793251117,0.482111991131122,0.170105588125239,2.834192  
55325211,0.00459416407701957,0.0185882986457206,1.92132379625896  
"Rad51c",219.006414296289,0.530206107031484,0.261182118758795,2.030024  
52675995,0.0423540462561455,0.102395436317709,1.20829366134844  
"Gabrb2",2.80321311128421,-2.3765492937055,1.23278045979763,-1.9277960  
441518,0.0538804999668663,0.123059855728471,-4.97907137492885  
"Cav1",6223.28998497539,-2.41994467501986,0.649410257820776,-3.7263727  
2952919,0.000194255086613132,0.00165541332114635,-15.4966107514837  
"Arpp19",7580.01352024218,1.10548044658999,0.182868299635003,6.0452273  
5103064,1.4919946009688e-09,2.12342414085326e-07,16.9857796968552  
"Bcl2l1",4912.96021113439,0.313886659668857,0.174946531484316,1.794186  
24082293,0.0727834475261552,0.154690610406036,0.585815530427878  
"Khsrp",3883.4760620913,-0.294700851976408,0.120895134085525,-2.437656  
85199479,0.0147827993627917,0.0457298146875635,-0.909153541036113  
"Dio2",1097.2250100684,-4.26733980578,1.23116996381304,-3.466085050161

28,0.000528096198490802,0.00361545634767334,-23.9932767777959  
"Ccdc124",3764.8709002761,0.232688492539283,0.184279844385285,1.262690  
95415984,0.206700266187201,0.339746182543081,0.251200365774833  
"Cct4",6496.1130163169,-0.0182314217711745,0.119970463292432,-0.151965  
919534168,0.879213815680883,0.924555139904302,-0.00143011988817736  
"0610009B22Rik",1263.42142635723,0.492477214106184,0.193454635737948,2  
.54569869689393,0.0109059276872741,0.0362563986438995,1.63361556999371  
"Cpt1c",517.374229901308,-0.859642703138823,0.2365737545821,-3.6337196  
6031209,0.000279364395793167,0.00218318516600207,-5.26700538227045  
"Twist2",63.5921620386976,-3.25646004394289,0.624544315555663,-5.21413  
767259347,1.84674280637237e-07,7.2304801684033e-06,-38.5473854748373  
"Zfp655",1404.98437431128,0.122138114395938,0.19292628414006,0.6330817  
74939845,0.526680243073025,0.65912781639524,0.0509117839037353  
"Rhoa",13247.5862125003,-0.377866719154551,0.195483458855121,-1.932985  
64168849,0.0532379666112057,0.121963796614415,-0.795043301304036  
"Zmiz1",4991.30516010363,-0.212519694240345,0.149648463118736,-1.42012  
613969663,0.155570961511453,0.275756600686392,-0.273775666176374  
"Ankrd26",740.706716003197,0.749879104101219,0.224925200362328,3.33390  
435083865,0.000856361005073045,0.00523099212935909,3.93923065459447  
"Aldh16a1",3289.31676667564,1.02501366788875,0.2528379059269,4.0540347  
9407514,5.03417237442815e-05,0.000581514980048513,7.63622249496984  
"Hnrnpa0",7859.09735445067,-0.13323705426747,0.146186777512272,-0.9114  
16590028365,0.362075915650751,0.506875086398503,-0.0905333370929411  
"Prrg2",1130.60488104265,0.127485391212085,0.16613557510381,0.76735757  
0059425,0.442868948296591,0.584224964460668,0.0685194657715826  
"Hnrnp1",25487.9468216403,0.0152704905699833,0.174829747106986,0.0873  
449216890915,0.930397348092364,0.956679177759194,0.000676286982657088  
"Ift43",1038.42278840683,0.185458121098614,0.141858205330395,1.3073485  
6448151,0.191094357548989,0.320966772951494,0.210757886281397  
"Id3",5224.18779957844,-0.487494623444344,0.123149308001884,-3.9585656  
7409122,7.54012091094616e-05,0.000792973449415471,-3.48057551170815  
"Tcap",21.6333357107984,-0.260683550225906,0.463764729430908,-0.562103  
009743312,0.574045837852811,0.699885591447864,-0.0930219004698273  
"Arid1a",6529.49473736182,-0.108118924912295,0.152193151535821,-0.7104  
05979646513,0.477452416137554,0.614942691429232,-0.0525702540282461  
"Crlf1",533.258664261421,-1.59772809475192,0.530749586657375,-3.010323  
76645699,0.00260969344008045,0.0122199334041039,-7.03749180899899  
"Ctsd",37697.025492822,-0.849140695911814,0.328409754503631,-2.5856135  
0345769,0.00972058619579427,0.0330598272537235,-2.89509120741531  
"Rplp1",29112.4216701348,-0.145951142526704,0.257148698845281,-0.56757  
4882478868,0.570323666470347,0.697122074563815,-0.0526584046244127  
"Hmgcll1",118.487246483234,0.521430348696151,0.217546485465124,2.39686  
863973605,0.0165358506364809,0.0497171959460454,1.56502334851816  
"Ttc9b",0.49865073136556,-1.0994170777488,3.68750161963593,-0.29814687  
3182213,0.765591067777938,NA,NA  
"Phox2a",3.72980754124512,-1.99508062675099,1.15064196717863,-1.733884  
80835869,0.0829385238620475,0.170892188105375,-3.52475363354753  
"Abhd8",888.106190453941,-0.151006693505888,0.190790197292976,-0.79148  
035721145,0.428663734176112,0.571375819590226,-0.0845196707045123  
"Ift22",928.13204646232,0.524141327301372,0.175280464773837,2.99030087

567183,0.00278702775506792,0.0127952595169094,2.28456459664918  
"Fzd3",368.231437397273,-0.342544447143683,0.132063921680393,-2.593777  
64029052,0.00949278593353272,0.0324890890173812,-1.17384877046781  
"1700008003Rik",33.2996686971757,0.431838616443762,0.379629801947714,1  
.13752559527252,0.255318630958342,0.396038398283671,0.399987973684434  
"Midlip1",3481.45874242216,-1.23690048686917,0.286532023644228,-4.3167  
9667472339,1.58309858502824e-05,0.000240774229414045,-10.3054230187175  
"Ap2s1",4675.88647680901,0.343134827497634,0.162338849093889,2.1136950  
8539008,0.0345413185423174,0.0875453826775127,0.835738486168443  
"Fgfrl1",1626.9878515959,-1.04672810666137,0.471950368841709,-2.217877  
50527735,0.0265631856649505,0.0718049347144328,-2.75687466104027  
"4930432K21Rik",26.5022264122609,-0.21985614197888,0.29839411099479,-0  
.73679785852985,0.461245285677444,0.600558302513443,-0.112103668924945  
"Fhl2",2262.67521429417,-0.772854034009268,0.331443504110233,-2.331782  
11195905,0.0197121565393313,0.0567973442003666,-2.21675072565357  
"Emc10",3614.88083181159,-0.371291676651072,0.30904532076527,-1.201414  
9760678,0.229590269670832,0.366269929474872,-0.37291968119003  
"Clstn3",1509.63844793456,-4.12134765743294,1.35569637235641,-3.040022  
63447043,0.00236560369613274,0.0113523359259651,-18.4567620579013  
"Fbxw9",1445.42032169432,0.193806334854948,0.14102372051497,1.37428181  
689743,0.169354209034995,0.293709818537783,0.237444352730091  
"Spib",323.938526546445,-2.09516627543584,0.548506817225465,-3.8197634  
1886489,0.000133579735100759,0.00124499888862074,-14.0137723977576  
"Fnbp4",4387.0235358113,0.1021525882733,0.18372604602462,0.55600493497  
5908,0.578207481150012,0.703255534119078,0.0359612825611273  
"Cers4",2205.48630622496,-0.169222328821624,0.185200339487795,-0.91372  
5802499277,0.360860942399887,0.505973439875808,-0.115286282343933  
"Scrn3",1505.16720398544,0.62796044576121,0.24136729052193,2.601679972  
47396,0.00927683756684063,0.0319519128914076,2.16239638158636  
"Phax",1731.70973161004,0.341000102923315,0.123370514924612,2.76403241  
999671,0.00570918665386467,0.0219431739359459,1.30238141014782  
"Tle1",1150.32975034259,-0.807609520629553,0.154133191754343,-5.239685  
95886032,1.60850087510737e-07,6.55427933297315e-06,-9.63913652529554  
"1700109H08Rik",50.5577081952208,0.0920372436548091,0.319408038381432,  
0.288149428302427,0.773232358028539,0.853273219584609,0.01460405367282  
22  
"Relt",238.053822587048,-1.76766091901664,0.45898796140588,-3.85121412  
248438,0.000117533676902134,0.0011294586654696,-11.9953767252316  
"Snrbp2",1847.56145497577,0.046702527948259,0.177786584634841,0.262688  
706485825,0.792790522094296,0.866858995053532,0.00667280819721559  
"Ubc",57767.9272845157,0.28098820880944,0.26335957292021,1.06693751699  
913,0.286000052020884,0.430139743298953,0.237054336386899  
"Prpf31",1643.47219482791,-0.289848360031425,0.117199624812627,-2.4731  
1679107181,0.0133940363231457,0.0424300439039308,-0.91589142273671  
"Sertad1",1082.49752898896,0.0245143389025769,0.190620008327946,0.1286  
03178216224,0.897671651341917,0.937131330399138,0.00159176127973596  
"Carhsp1",3346.04289651803,-0.982894240331831,0.301533656030975,-3.259  
65019384392,0.00111549700646165,0.00640373612531635,-4.96447465791849  
"Elk3",2598.4786194526,-0.847099042071938,0.248824641112678,-3.4044017  
4366949,0.000663091510600282,0.00428191464783333,-4.61953181503984

"Herpud2",1742.5666128181,-0.179616538107636,0.140072705550446,-1.2823  
093364392,0.199734154074839,0.331242369324761,-0.198459199892209  
"Rdh13",1264.60275489736,0.381139928409333,0.143220843778315,2.6612043  
2162292,0.00778616927537241,0.0278763732154262,1.36447171519542  
"Adam21",12.1231920374259,0.280633893747098,0.419620820875177,0.668779  
716797172,0.503636007237707,0.638567750625622,0.125872018803778  
"Nutf2",178.943680941746,-0.362088312886732,0.320341139904757,-1.13032  
098529208,0.258340995081877,0.399392064867303,-0.332328899353798  
"Fut1",15.9903122982769,-1.08948758016102,0.748997390355953,-1.4545946  
2768389,0.145781519183276,0.262291045587849,-1.45806180677313  
"Apc5",7317.65650771498,-0.166775903054713,0.125055077037206,-1.33361  
960990272,0.182328552889462,0.310348504953185,-0.195137713634173  
"Rnf151",2.63896703508726,-0.611315172273854,1.19140352592311,-0.51310  
5055485044,0.607877835359311,0.728079245275253,-0.193998047668147  
"Elavl2",6.8277472727126,-0.803803472215304,1.27582257194136,-0.630027  
630716858,0.528676506551374,0.661116888451687,-0.332633665626213  
"Pou2f2",1689.40409973463,-0.683131431382526,0.442087347064312,-1.5452  
4085776006,0.122288014966566,0.229863271552888,-1.0043880720238  
"Mgst1",8226.12716086268,-1.90036451812861,0.614683201763316,-3.091616  
15719629,0.0019907007986615,0.00995758957729656,-8.75957868651665  
"Nfib",9320.41307498803,0.379526014714237,0.203680671754754,1.86333838  
868723,0.0624146723517427,0.137509749323647,0.753002559418296  
"Htr3b",2.24362070338,-0.433658140396327,3.43057209194471,-0.126409860  
738562,0.899407497027562,0.938343658844678,-0.0275975803880149  
"Rab25",753.943967587407,-0.225227019559673,0.299572173941288,-0.75182  
8905190019,0.452153956851361,0.592718693739938,-0.117801697670697  
"Ubqln4",3735.63113816914,-0.0776553597227601,0.109143513867185,-0.711  
497705830301,0.476775871966579,0.614217109455193,-0.0378497515404406  
"Rbfox1",108.898902187252,1.08781637780069,0.459810096594218,2.3657948  
9197403,0.0179914087280652,0.0529744015976767,3.1959462880703  
"Rps18",23240.3943862119,-0.0157634105385488,0.159862279701009,-0.0986  
061913293816,0.921450954012274,0.951630324229648,-0.000781528369396185  
"Rpl10",4841.99836331743,-0.559123440918997,0.240889946453488,-2.32107  
420484215,0.0202828392995386,0.0580897180761463,-1.5911348135644  
"Rps15a",11724.1366777057,-0.341878930168672,0.215181686962863,-1.5887  
9194133131,0.112107373252696,0.214970837529262,-0.525554376663719  
"Ncaph2",4063.42232188325,0.0956783678155883,0.0983392897656129,0.9729  
41415823046,0.330582419538278,0.475241172023693,0.0711782830743238  
"Hipk1",5115.4425767277,-0.145540595280368,0.10743741528588,-1.3546546  
600465,0.175527609736322,0.301846452710381,-0.174333884652082  
"Gprc5b",1346.47751300998,-1.25764900480769,0.520352650891285,-2.41691  
668650774,0.0156525993185888,0.0476642794805317,-3.82774657899903  
"Man1a2",3034.27895262477,0.660814244742067,0.393621854951034,1.678804  
76256653,0.093190100129071,0.186897816531231,1.10831318889518  
"Tppp2",0.380866608768923,-0.360412436339999,3.18779817189627,-0.11305  
9992165566,0.909982993185256,NA,NA  
"Acyp1",635.351832170542,0.00397597985561286,0.263645722654418,0.01508  
07675375204,0.987967744500225,0.992123643519782,3.14402150531036e-05  
"Clnd13",0.586692608390066,2.54827289308836,2.73464194468181,0.9318488  
28708311,0.35141465594435,NA,NA

"Cd163",62.8194261157627,-1.24894754651426,0.45098586746923,-2.7693718  
0653333,0.00561645013840629,0.0216678956863169,-4.78587154790038  
"Hdac5",4864.22302474704,0.124912117065515,0.174352931602043,0.7164325  
59623513,0.473724296235153,0.611456249529657,0.0614457534116101  
"Rala",2720.8128194841,-0.057016393797188,0.154362091162641,-0.3693678  
50407738,0.711853557991994,0.80874727151427,-0.0121028018839269  
"Vdac3",5944.27188331875,0.164974355921264,0.218841214514081,0.7538541  
41632217,0.450936809542916,0.591530095506957,0.0866185840484432  
"Slc1a7",5.62670552660073,1.50384826410301,0.674857478874349,2.2283938  
6267364,0.0258542620033047,0.0702881205438419,3.99294644309123  
"Vps72",2080.79860983218,0.0405860509831707,0.169602358670392,0.239301  
217868358,0.810872021117248,0.879527295713401,0.00521005895495191  
"Gabpa",1965.7338407372,-0.219498195194216,0.140891265347077,-1.557926  
21106423,0.119250740985179,0.225414536861756,-0.327011524965949  
"Bmp7",1494.90448556628,0.61381565830401,0.18518028171894,3.3146923236  
4404,0.000917440442909814,0.00550577216246708,3.19304342952425  
"Dynll1",6217.27675793993,0.063322202042375,0.221515976189509,0.285858  
39780785,0.774986578421336,0.854443956493554,0.00996085877588266  
"Pdcl",1476.78168450294,-0.0494839286150015,0.11282217844089,-0.438601  
073821022,0.660950618815432,0.769738346085997,-0.0129501733360666  
"Tmem184b",2921.59084535914,-1.29552093185822,0.271009278392819,-4.780  
35637577104,1.74984730513766e-06,4.25417989470998e-05,-13.039448573006  
9  
"Rsph14",0.0784399670938122,-0.00670295202529588,4.78471990596623,-0.0  
0140090792293562,0.998882237562793,NA,NA  
"Nf2",3530.48865262341,-0.155176329913855,0.177835269160992,-0.8725846  
71454432,0.382889498539119,0.52766029642258,-0.0992046281184911  
"Cabp7",1.58822204878087,-3.78024896734766,1.49918408164493,-2.5215375  
5741584,0.0116843201602689,0.0382570738009947,-12.3365657900887  
"Zmat5",1029.99834083547,0.137425690013828,0.168004073799293,0.8179902  
24320423,0.413362769281445,0.556881591615395,0.080449362291989  
"Ewsr1",16732.8718801389,0.233862765853323,0.144094015571611,1.6229873  
5950696,0.104592107050279,0.203982924247763,0.371776080704845  
"Ap1b1",4242.78974806861,0.223633262234664,0.108615380983576,2.0589465  
3417898,0.0394993605938356,0.0969972963297994,0.521752541245946  
"Derl3",86.7188140182705,-0.419187602467383,0.561188414043035,-0.74696  
4106844939,0.455085227267177,0.595320480459941,-0.217413911880497  
"Gstt4",5.8129016344883,-1.22368631781913,0.800414806036811,-1.5288151  
9505881,0.126310264361459,0.235269156908648,-1.77070478178272  
"Tbx1",55.4261150302235,-1.15595350655251,0.424782695097061,-2.7212820  
1053102,0.00650292586979834,0.0243179993496985,-4.29614569842294  
"Gnat2",13.8571650377563,0.193078381849373,0.537312192228193,0.3593411  
51461111,0.719339892875785,0.81414043269295,0.0397012414463867  
"Bcl2l13",1660.37609897681,-0.813678596342476,0.422919476172294,-1.923  
95631363875,0.0543600595979397,0.123831376708811,-1.69963992727518  
"2610028H24Rik",2.91471010068386,1.88343995232459,0.93489899354151,2.0  
1459191349634,0.0439474254717656,0.105411078454253,4.23752808055398  
"Spatc1l",5.55280671684622,-0.451013078700067,0.705571169850752,-0.639  
21698897571,0.522681781578247,0.655934181451545,-0.190189882749603  
"Dqx1",656.346426628864,0.562083776121037,0.214968611323865,2.61472487



848107,0.00892993538747286,0.0310090614755024,1.95238440042032  
"Ccl8",635.275523401682,-1.64594333618726,0.582966847143942,-2.8233909  
7712165,0.00475185841694883,0.0190995125569302,-6.51479591650783  
"Ln timer",405.847783672109,-0.192197392505094,0.11172696426388,-1.7202417  
8560116,0.0853885003949387,0.174848244139941,-0.335160896988214  
"Prr29",3.61265762863628,-1.11850258632117,0.820371695806163,-1.363409  
52770444,0.172753480010696,0.298208440644914,-1.35334626583982  
"Mymk",4.63448303915381,-0.517315315521669,0.919855884626314,-0.562387  
352375123,0.573852134324756,0.699791663960479,-0.184667398970082  
"Fam163b",4.30431331945294,1.18918884060527,0.922747331675586,1.288748  
06762742,0.19748568572056,0.328599277923746,1.32346760977966  
"Trpm5",7.37095030748189,-1.74693418098837,0.939971161464913,-1.858497  
63546558,0.0630983788574002,0.138655718580141,-3.45152488389998  
"Ascl2",15.1653505427426,-1.20757687865508,0.57310759379002,-2.1070683  
6157806,0.0351116543207317,0.0885993342231072,-2.92672068047881  
"Rarres2",4394.49260259722,-0.727783719786427,0.319334112044972,-2.279  
0666337705,0.0226631045890641,0.0633940843275661,-2.00750749869445  
"Pttg1ip",12922.0942251192,-0.0516090658608587,0.227448704291413,-0.22  
6904198120803,0.820498237564142,0.884849260842126,-0.00631374862007834  
"Trpm2",608.530654650789,-1.07979399806428,0.448750553779929,-2.406223  
21013073,0.0161184130956239,0.0488083271530477,-3.26082059384172  
"Ube2g2",1951.96192862514,-0.803864037185045,0.226049191159877,-3.5561  
4648767533,0.000376334292250208,0.00275418185169263,-4.73848496745986  
"Mpo",0.793586978571083,-0.558212666915032,2.94354097034593,-0.1896398  
49602443,0.849591358332994,NA,NA  
"Lpo",11.3729317004978,2.11046212072114,0.751942534416638,2.8066800641  
3342,0.00500549284759712,0.019901529270483,8.26659296993152  
"Met",5138.35098977621,0.60485868287321,0.221176977416922,2.7347271399  
4568,0.00624320047956393,0.0235910703392515,2.26633714416766  
"Slc16a12",3503.18933486739,1.03884994823799,0.300770101956677,3.45396  
680547597,0.000552405364736156,0.0037346739950158,5.80726963960987  
"Syn2",314.872402060861,0.184995923429484,0.258575404985135,0.71544284  
5154277,0.474335445800627,0.611962715689845,0.0908485233359639  
"Elk1",455.753759020045,-0.526579524617464,0.231282654744967,-2.276779  
14367646,0.0227994175852246,0.0636789921324608,-1.45014765017026  
"Nav1",3424.32257571127,-0.989470921503041,0.29087850266095,-3.4016639  
6777824,0.000669769365374906,0.00431565204430929,-5.38817068565335  
"Tnpo1",5417.37442443135,0.0341058747178155,0.167716963935658,0.203353  
756933614,0.838858541212173,0.896910717073642,0.00371068359387784  
"Otog",1.02121442350651,0.319106559841026,2.21530653829503,0.144046232  
123985,0.885463962337975,NA,NA  
"Rnmt",1168.91539314986,-0.467176661978863,0.154859396541034,-3.016779  
55883725,0.00255475523993624,0.0120262234834082,-2.06523185628148  
"Kcnq1",939.897870576827,0.788599082781976,0.323918009033256,2.4345638  
7354188,0.0149097481266394,0.0459984602805719,2.42821278007288  
"Srp14",3426.28338313897,-0.143193899658858,0.17166883814102,-0.834128  
670115596,0.404208480779259,0.548100444892579,-0.0861020215059522  
"6330409D20Rik",2.36613850110265,-1.02733991786357,1.42673290388566,-0  
.720064642138442,0.471485196157118,0.609414541244381,-0.50879682456880

"Cdk9",4490.42587102911,0.0130921747058288,0.148539059691139,0.0881396  
09426986,0.929765715095927,0.956462801665501,0.000582776959618435  
"Tor2a",1807.63183787592,0.303535086071822,0.137576798406526,2.2062956  
0788954,0.0273633087153325,0.0734181633867556,0.792707348844927  
"Fpgs",2814.08812468716,1.25746984850608,0.304193283930159,4.133785704  
46936,3.56836215669137e-05,0.000447723103121004,9.69677199616955  
"Mrtfb",1447.58502496695,-0.445639896177361,0.147080072486554,-3.02991  
349299274,0.00244623794045239,0.0116333530153514,-1.98482619590411  
"Cbx5",4418.29131035393,-0.122308203633085,0.102769528001867,-1.190121  
29384172,0.233998722034185,0.371660726802096,-0.121057463502325  
"Odam",0.419510291884049,2.30453208788503,3.63537310403797,0.633919001  
415642,0.526133684285244,NA,NA  
"Apobec3",3122.77276493224,-0.944356565590775,0.242288045847385,-3.897  
6605811812,9.71264169516139e-05,0.000967196566763314,-6.55488167563179  
"St6galnac1",0.470166085995672,0.365681046456519,3.08534196968258,0.11  
852204716683,0.905654027102129,NA,NA  
"Taf7l",0.289932122451383,-0.474970018094316,3.93860283167104,-0.12059  
3529836264,0.904012993883157,NA,NA  
"Sardh",9493.91490786409,2.13281605906661,0.52731325722422,4.044685070  
68032,5.23935060583371e-05,0.000598809250366621,15.8267054404532  
"Vav2",2774.96686831262,-0.251730732741367,0.146305224948243,-1.720586  
07497045,0.0853259620989547,0.17475689170225,-0.439108885319842  
"Tex15",20.8691961046249,-1.91072034278394,0.861941999463463,-2.216762  
08372874,0.0266393537845957,0.0719502191504199,-5.02859711189237  
"Ppp2cb",1994.28162185693,-0.500324225445269,0.24686458098936,-2.02671  
530861218,0.0426915359719687,0.10300700017095,-1.13721611604526  
"G0s2",3340.35174916624,-1.23111969444973,0.520456695505711,-2.3654603  
8331487,0.018007669805664,0.0529982710748432,-3.61640916219847  
"Dmap1",1127.98491545326,0.0797268635523972,0.139463834070431,0.571666  
942069971,0.567547634400833,0.694623298948431,0.0290513207136873  
"Pla2g12b",53.3406883530141,0.340751408051532,0.700672254281268,0.4863  
20681273538,0.626739818274894,0.743364740965015,0.101056117490006  
"Mcu",1461.63966722702,-0.328087126900658,0.205247545538522,-1.5984947  
6416311,0.109932909734163,0.2116732191412,-0.509424691904251  
"Oit3",15.3857661413786,0.520764921609929,0.448590034898567,1.16089275  
529199,0.245685515426246,0.384774960622724,0.497380823450878  
"Tex11",2.53991180032195,1.73025090117996,1.35790767495965,1.274203639  
2359,0.202591255808955,0.334614511288692,1.89423737221058  
"Bcr",2416.88309273733,0.137479933406165,0.172587945611994,0.796579001  
613719,0.425695576699273,0.568655542503614,0.0776047280243753  
"Fxyd5",3083.2007801237,-0.958090296682737,0.330722032196801,-2.896965  
43746626,0.00376791263750524,0.0160547990834959,-3.95858715530988  
"Kcnd1",224.413190893677,-0.501164776849126,0.273399981463713,-1.83308  
270236896,0.0667902730855839,0.144745664624065,-0.968639810917242  
"Tfcp2",1981.25276048705,0.460917291385846,0.165335031832765,2.7877775  
5855191,0.00530709702760292,0.0208219457065266,1.78455549343589  
"Pou6f2",1.47939658334817,0.676422590772239,1.83061545119828,0.3695055  
61820462,0.711750928309892,0.808724918425773,0.143602112294821  
"Pou6f1",2492.34424750776,0.200011880906823,0.138741905498618,1.441611  
17139057,0.149412095144538,0.26722042112715,0.2639519617851

"Ubp1",5671.85624577247,-0.0265976549029509,0.158545127751711,-0.16776  
0783823039,0.866771475155677,0.916273245901195,-0.00232571637697747  
"Nuak2",4318.0998160586,1.10991883154079,0.442668433577929,2.507336749  
923,0.0121644758362685,0.0393664647063174,3.59041091485661  
"Ick",1171.43087240627,-0.29615236080046,0.174277108995155,-1.69931876  
026641,0.0892591396725661,0.18093795879938,-0.506302394547956  
"Sdhib",11890.8528998025,0.862378975202713,0.392200779538799,2.19882014  
568357,0.0278907134463647,0.0743655716730393,2.24111787470219  
"Cox4i2",86.1071231860088,-0.286666404157362,0.363325444157349,-0.7890  
07235158606,0.430107777820177,0.572791575161383,-0.159740086916451  
"Snap47",1705.01734223776,0.199951069228282,0.15995492359415,1.2500463  
5515699,0.211282614370249,0.345284419997578,0.212625326822746  
"Wnt3a",1.76808834535056,-0.662677408446103,1.93040563450337,-0.343284  
021037676,0.731384800631727,0.823975318814203,-0.128304089234527  
"Kdsr",1390.54275686804,-0.0850678791300729,0.200499646480614,-0.42427  
9446987943,0.671362026560469,0.777744447381381,-0.0213824309317825  
"Vps4b",3071.93372131597,-0.293371287451388,0.140596497275096,-2.08661  
875037589,0.0369226109911278,0.0921788820877092,-0.699404254518471  
"Rps25",15018.5365457686,0.138592897379211,0.143675585601258,0.9646238  
55884934,0.334733246189912,0.479414717179974,0.101892009428137  
"Nxf2",3.93401077238672,-1.64453153395648,0.829868296406201,-1.9816777  
4462313,0.047515319625052,0.111931098471579,-3.60131321268324  
"Taz",3554.32011462796,0.0886130156417955,0.132055244128466,0.67102988  
7730856,0.502201489827889,0.637174124362563,0.0399389769862402  
"Kif19a",97.7712256969902,-1.21979094984187,0.387674178148541,-3.14643  
331590296,0.00165274944887648,0.00867204218358277,-5.79114168615743  
"Aldh3a2",5432.05692955557,1.28276211158954,0.256686502529557,4.997388  
24966786,5.81119943010104e-07,1.77318883392974e-05,14.0336047048229  
"Zmynd10",682.124781703352,2.007169856075,0.539138557335652,3.72292025  
63329,0.000196931735010123,0.00167456387668006,12.830236211547  
"Tmem115",1657.12739199734,0.234644983680624,0.118435356704513,1.98120  
721893922,0.0475680400033682,0.112028221281033,0.513638916662657  
"Hyal2",2437.80723525359,0.243115648731792,0.137320490612806,1.7704251  
3937188,0.0766563449424083,0.160818314362715,0.444288993872297  
"Ifrd2",2651.78593354113,1.22867942392762,0.240928054270992,5.09977730  
756758,3.40053327124109e-07,1.18278652441857e-05,13.9394323845846  
"Hyal1",1183.4489416565,-0.67908606110512,0.280417567936184,-2.4216958  
5202188,0.0154482740689304,0.0471525434871643,-2.07417827710647  
"Tusc2",2061.28534354364,0.366910800828596,0.163291730692762,2.2469649  
8268457,0.024642265118462,0.0676527108351782,0.988225756125134  
"Nprl2",1352.06563215424,0.543354408866966,0.127912787311594,4.2478505  
885683,2.15831251653854e-05,0.000305304920043773,4.39801900789103  
"Slc38a3",954.167907283139,2.20181487714563,0.662618431317939,3.322900  
13841941,0.000890868004014341,0.00539445476468063,11.4987222315223  
"Cacna2d2",26.7752870170146,-0.265467307120391,0.487680217570675,-0.54  
4347089662129,0.586202648255373,0.709791916766023,-0.0909977932590866  
"Rassf1",2110.60008429929,-0.145493665296123,0.128023886793718,-1.1364  
571795149,0.255765276890967,0.396573468693446,-0.134566212545138  
"Epn3",2247.75780518841,0.186118661162645,0.185912165772784,1.00111071  
477761,0.316773285460122,0.461928466075946,0.143747861134881

"Rnf112",2.42969677947373,-1.52216006588169,1.04466316671274,-1.457082  
16235048,0.145093701625558,0.261367054166216,-2.04247931334267  
"Slc3a2",6848.15694005767,0.344050516389693,0.122506304870199,2.808431  
09874411,0.00497835342298344,0.0198300173731013,1.34887016281901  
"Nxf1",9785.78865646898,0.496259029821659,0.3235038318826,1.5340128335  
8446,0.125026495579461,0.233637253305616,0.721553466345757  
"Stx5a",3814.64454679815,0.0304289617566893,0.102929934886822,0.295627  
912231246,0.767514255035616,0.849837719005984,0.0049510923064298  
"Slc47a1",16988.0260610134,1.89239410988164,0.555063729207076,3.409327  
63267557,0.000651232168554356,0.00423257494082428,10.3418292331549  
"Pifo",1.80228903696963,-0.308858308745278,1.33741008541576,-0.2309376  
2497631,0.817363260167262,0.882982372804105,-0.0384374293183292  
"Tnfrsf13b",272.0426834743,-1.45775723681043,0.426544679775188,-3.4175  
9563752792,0.000631768933051832,0.00412947725666933,-8.0025106175017  
"Spire2",344.978508007684,0.319548764053916,0.270391866180629,1.181798  
72999748,0.237285571863223,0.375443810775714,0.313044814668272  
"Prox1",293.006981679864,1.11328593239513,0.391640992781458,2.84261850  
24415,0.004474459366577,0.0182173749696217,4.45913261968679  
"Raver1",1902.09557221239,-0.0330743745443576,0.0932952774269172,-0.35  
4512848415788,0.722954576837578,0.817121809702574,-0.00667993555576497  
"2610507B11Rik",12141.8169913448,-0.074159875885803,0.220088619678091,  
-0.336954613983548,0.736151114134817,0.827623503626862,-0.014030821126  
4728  
"AI597479",852.334417611252,-0.338989566779915,0.121410132680122,-2.79  
210276190907,0.00523667223818893,0.0206188681947108,-1.31580450906641  
"Tmem86a",1888.09329728132,0.570959515694298,0.174616141821858,3.26979  
802518365,0.00107624299531711,0.00622646311848861,2.89987301951566  
"Optc",24.1278383492861,-1.89231562917049,0.808265999335664,-2.3412040  
4758562,0.0192216586321475,0.0557465268495629,-5.46300200274261  
"Tex14",29.7035917661799,0.520572652732213,0.770828609136151,0.6753416  
34394715,0.499458737899563,0.634828199671814,0.236548665463212  
"Ifi35",2019.92174289899,-0.478982893053072,0.149623133161709,-3.20126  
22843247,0.00136826922263135,0.00749256557370926,-2.34406756057473  
"Rdm1",921.609866604244,0.207414038297014,0.210116470643069,0.98713840  
7865964,0.323574791221704,0.468483053333391,0.15727280423254  
"Nedd8",5468.82133396185,0.388023430042866,0.188141170067566,2.0624057  
451302,0.0391691227997963,0.0963805598624973,0.907761707876771  
"Gosr1",2301.35873593342,-0.0782220409872624,0.149390320827947,-0.5236  
08494537947,0.600550872068754,0.722231598322123,-0.0254541888501723  
"Mrpl52",2139.45258306349,0.123965886552125,0.166994329235453,0.742335  
905175194,0.457883842733027,0.597698277137883,0.0638014243585472  
"Spaca7",53.4318607227334,-1.29452364215602,0.530073163383453,-2.44216  
031215972,0.0145996618705654,0.0453503595909327,-4.00439810388646  
"Kansl3",5019.62107661652,0.62449492475636,0.170101853240327,3.6712999  
4682685,0.000241319929241689,0.00195522171231303,3.89513202117488  
"Eya4",177.553917614978,-1.22630382176962,0.318224008505369,-3.8535867  
4705063,0.000116399996455768,0.00112049493542002,-8.33148950647576  
"Ebf3",262.980257611468,-3.42399835632306,0.793502352053816,-4.3150449  
9950221,1.59570395144168e-05,0.000241936513570838,-28.5110700615975  
"Myt1",1.38082700092576,-0.342203159565819,1.67931201473819,-0.2037758

06141165,0.838528700039751,0.896803937983383,-0.0372720892375025  
"Faf1",1684.68623911115,0.0189011596476459,0.214461487862416,0.0881331  
181464693,0.929770874311026,0.956462801665501,0.000841354519032934  
"Gm266",157.095476045499,-0.091128456632901,0.474076019580179,-0.19222  
3299363677,0.847567295957505,0.902756863136645,-0.0093226248627675  
"Tsacc",90.8364894822045,0.490064128957127,0.216222757301327,2.2664780  
2975788,0.0234221308347598,0.0650150074568486,1.33941247760967  
"Mettl16",1505.46446761619,-0.89563097148423,0.278021742625859,-3.2214  
4219018691,0.00127547190912525,0.00707716314289245,-4.43416337860686  
"Dazl",6.35661289047142,-1.32013002986867,0.878485046810868,-1.5027347  
7580647,0.132907451251876,0.244152014745533,-1.86133612954904  
"Apol7a",15.0678452997277,-2.45254952255552,0.918641579204625,-2.66975  
671260055,0.00759062237931253,0.0273759258655944,-8.82449702596508  
"Pigyl",1088.37622170464,0.215620651717606,0.240141604570525,0.8978896  
10187402,0.369244404303899,0.514251956794102,0.143396777668288  
"Rbm25",16520.7773689647,0.428213880866429,0.253272997091502,1.6907206  
2866506,0.0908901725132526,0.183398176928842,0.72629170472615  
"Psen2",1519.73775950456,-0.0717324067323387,0.146858488067388,-0.4884  
45766236021,0.625234131558026,0.742283794261141,-0.021377952737136  
"Acaa1b",10067.9443823756,1.56999713750996,0.637068201758783,2.4644098  
2798325,0.0137239090622383,0.0432711479455891,4.93021364758591  
"Plcd1",1020.12930073378,-0.535783064791088,0.172003276517302,-3.11495  
848009147,0.00183970803679038,0.00936325432037034,-2.50262253150803  
"Fads1",4345.71374002879,-0.520897440360447,0.212981003508148,-2.44574  
60138717,0.0144552791942186,0.045059797558573,-1.61465956915439  
"Lmbr1",754.26260627986,-0.158096726469559,0.188118474400093,-0.840410  
422069002,0.400678307616258,0.544799556617977,-0.0960180449990846  
"Tnfrsf22",455.982518650203,-0.521567891872909,0.140777233637004,-3.70  
491647262921,0.000211460403441729,0.0017657622896389,-3.30630898813607  
"Cars",1286.07037724644,0.0549265276430806,0.173638696680499,0.3163265  
37189733,0.751754670733997,0.838578454495305,0.00966965792627429  
"Phlda2",319.777539271922,1.70503506072212,0.518579199595309,3.2878971  
2748352,0.00100938715686871,0.00591554877806613,8.74712143698998  
"Asz1",9.24285514588387,-3.43737903509324,1.13406853131546,-3.03101526  
951467,0.00243732921615936,0.0115966434984566,-15.32053439823  
"Wnt2",49.0278491635329,-1.40415608688748,0.501170292396173,-2.8017544  
2996431,0.00508255457167677,0.0201422050891369,-5.48314233474506  
"Gabra1",0.810899549368993,0.0462763950852629,2.49537125943239,0.01854  
48938350717,0.985204163612424,NA,NA  
"Grid2ip",3.45011908550919,-2.97316814353492,1.40637083669841,-2.11407  
124348136,0.0345091828551643,0.0875043587896175,-7.24283582507668  
"Kdelr3",419.333554890934,-1.48612776021508,0.321129550807364,-4.62781  
377945055,3.69546073407942e-06,7.8747643052547e-05,-14.0428108841264  
"Apip",1005.25870700823,-0.292799197441439,0.279862237350167,-1.046226  
17261179,0.295456621829093,0.439823882457143,-0.240499668120761  
"Pdhx",1951.17418974387,-0.50611074964112,0.420012133126353,-1.2049907  
8413258,0.2282068596466,0.364689562280912,-0.510518367742824  
"Vac14",1434.55640773464,-0.313817522866081,0.267807542513045,-1.17180  
240676304,0.24127639619776,0.379830393693235,-0.303784920477564  
"Mcoln2",90.9285515239506,0.367600041389564,0.440888253676081,0.833771

456428135,0.404409782817654,0.548267413807441,0.220924731737041  
"Slc5a1",2028.95093768744,1.78481762034766,0.474732686399951,3.7596265  
6770591,0.000170167171259097,0.00149854117883885,11.6071387340294  
"Akt1s1",3147.34644590242,0.192868475696999,0.167175815888708,1.153686  
46279194,0.248628735851651,0.388069411754362,0.182563717304572  
"Tbrg1",1961.15894323301,-0.24525837067001,0.133508844384567,-1.837019  
65064991,0.0662069945001794,0.143753227033909,-0.475717152420749  
"Adssl1",353.096706532316,-0.863866353105558,0.313101322421999,-2.7590  
6325282535,0.00579673137593883,0.0222183346506891,-3.28859878116307  
"Cfap161",6.02722129316117,0.288748674418744,0.930311612385889,0.31037  
8448010786,0.75627318142867,0.841774546120265,0.0497349554105096  
"Brf1",3097.97957727126,0.230939463686243,0.169997366512711,1.35848847  
793166,0.174308736208193,0.300342147277072,0.277781599441263  
"Vipr2",32.3749046256383,-0.437660719237711,0.364592892849934,-1.20040  
935470964,0.229980397537159,0.366682295459934,-0.439087268133137  
"Odc1",23696.4048967985,1.1792349420205,0.431348410487261,2.7338339804  
9017,0.00626015999227285,0.0236276808999876,4.41663147560598  
"Thg1l",429.229998376267,-0.0774120096380692,0.183577469660051,-0.4216  
85786286415,0.673254380540743,0.77924218875599,-0.0193091395602359  
"Adam19",817.511920776797,-1.57434255765187,0.251455531388379,-6.26091  
8377732,3.82716817177413e-10,7.31589460914236e-08,-25.8674422921142  
"Pabpc4",4924.35448684361,0.018724338335324,0.165257033640992,0.113304  
335209121,0.909789280375931,0.944789366596963,0.00106341638060343  
"Exoc3l2",1689.65742613471,0.308855716528717,0.312570035401833,0.98811  
6842779438,0.323095427928334,0.468111873190333,0.23443630352755  
"Zfp296",138.801421934172,-0.142160390741746,0.200117308851967,-0.7103  
85281299711,0.477465248002212,0.614942691429232,-0.0691221066072443  
"Plin5",409.118993764181,-1.38887174680487,0.818673763823371,-1.696489  
86956485,0.0897931470634273,0.181711134555548,-2.36849441359458  
"Sugp1",1702.11211610513,0.375031013515058,0.0914383780801428,4.101461  
78649796,4.10548314050645e-05,0.000497815362397977,2.85221635697803  
"Dmrtc2",0.339298802794277,-2.39089727048973,4.74033101555884,-0.50437  
3484181223,0.613998947566137,NA,NA  
"Dhdh",1929.21695628448,-1.75976584557846,0.607964375541691,-2.8945213  
1798104,0.00379737123606901,0.0161485592935384,-7.26066091292593  
"Zfp790",464.424710170756,-0.503279793904259,0.134951513193152,-3.7293  
3790808206,0.000191983557408982,0.00164107645872877,-3.22723279745858  
"Cpb1",6.23358915778619,0.095009355665704,1.03330264852206,0.091947268  
113168,0.926739935972119,0.955102028203625,0.00436445506952955  
"Slc25a41",0.587226725782629,0.617778155136654,2.50660494627753,0.2464  
60119714554,0.805326072268551,NA,NA  
"Fsd1",17.0520817526781,-1.08143687073894,1.11605003133061,-0.96898601  
3511958,0.33255216762663,0.4774040763057,-0.799605799452171  
"Pinlyp",2.36817900434545,0.552965233939707,0.975290915697048,0.566974  
658576101,0.570731398864049,0.697376796331572,0.199304936874881  
"Fuz",1583.57495561349,0.283256585883702,0.128616269646825,2.202338682  
82382,0.0276413936619311,0.073930300908139,0.737779312050449  
"Sptbn4",30.3680264368056,-0.213531697255068,0.327800341019599,-0.6514  
07794729233,0.51478328027512,0.648568389687535,-0.0924566246327956  
"Pgam1",11968.7462556138,0.0719726298963621,0.349119493702596,0.206154

71549026,0.836670059796503,0.895848040961681,0.00791587209571284  
"Evi5",3831.25857656646,1.10134209269824,0.18071857634555,6.0942384284  
4122,1.09959668193513e-09,1.674995008154e-07,17.1834537258812  
"Evi5l",1265.81217903267,-0.123877536508243,0.127169883979649,-0.97411  
0635565785,0.330001609293868,0.474616167146997,-0.09231959419723  
"Snapc2",934.072550574477,0.245584084706871,0.124078872879636,1.979257  
8624171,0.0477869812165372,0.112462348794212,0.53663481871305  
"Git1",2800.22694871119,0.0247075234341547,0.117592313247385,0.2101117  
22032171,0.833580476826982,0.893668671972975,0.00277762436791628  
"GltP",3155.46288797012,-0.145949662391101,0.12902574096523,-1.1311670  
1597111,0.257984801881701,0.398936288927702,-0.134120960625894  
"Bnip2",3512.42479051315,-0.686667278858385,0.137773996672483,-4.98401  
218983822,6.22791533407349e-07,1.87975066847933e-05,-7.47216660152285  
"Ccnt1",2862.84723139319,0.482946214967946,0.254440344057348,1.8980724  
804361,0.0576865347648397,0.129791374895551,0.986092585582921  
"Scarf2",3368.76468853363,-0.757376908944232,0.349189021182357,-2.1689  
5968372587,0.03008574486261,0.078877484648537,-1.9236309050939  
"4930579F01Rik",24.6680708955411,1.82074958788112,0.60297907874856,3.0  
1958998587473,0.00253117088943838,0.0119411492867819,8.06185115419035  
"Brms1l",840.147601318026,0.455986567476034,0.175636523319619,2.596194  
45237048,0.00942627020886256,0.0323313009777889,1.56481797139691  
"Med15",1908.97630410058,-0.243596714127743,0.190337278261366,-1.27981  
610514175,0.200609818397415,0.332178995590018,-0.268463386306687  
"Dhdds",2288.17304555363,0.274126360883696,0.161432920391858,1.6980821  
5213036,0.0894922576541236,0.181271560330366,0.468141770565607  
"Crybg2",258.101550950979,0.218466407869865,0.348243888003696,0.627337  
37876125,0.530438106525193,0.662682270841815,0.0898901080405635  
"Ubxn11",292.435876740857,0.0717728584734732,0.43170926771129,0.166252  
762777083,0.867958038460555,0.917232035449201,0.00620080183700243  
"Mogat1",3273.92539488321,2.14196647801339,0.634808017435321,3.3741956  
925294,0.000740317182921786,0.00466736301593826,11.4962790114995  
"Tex22",0.565752516713439,-1.51823250845711,2.35982564459928,-0.643366  
391043235,0.519986386061911,NA,NA  
"Wnt8a",0.154367723061889,-0.541723841893663,4.78471990596623,-0.11321  
9551518192,0.909856495461738,NA,NA  
"Tjap1",1453.54010189641,-0.22176054896551,0.135051266166645,-1.642047  
16668018,0.100580229596057,0.198212382925401,-0.35890086100128  
"Ehf",2187.00868808527,-0.087668305358946,0.228872677072969,-0.3830439  
98436719,0.701687141329453,0.801540563691,-0.0193939560788662  
"Nanog",7.54206242570197,0.704310476103136,0.644688171514643,1.0924823  
9260915,0.274621125498149,0.417900780844681,0.614518807577661  
"Rpl15",16589.8975808296,0.281501060312397,0.173826973361084,1.6194325  
5910948,0.105354226142367,0.205065551941611,0.446017482273096  
"Tmem167",2374.57814236964,-0.152289453200793,0.130347520595785,-1.168  
33410029371,0.242672025461961,0.381495737256774,-0.146754584696204  
"Steap4",1355.185009478,-3.39715087434567,0.811313938303163,-4.1872211  
408702,2.82390652256071e-05,0.000372030603897896,-26.8257188721606  
"Mplkip",869.627574474675,0.312929732668326,0.167240649861444,1.871134  
39781287,0.0613264548671396,0.135839267217332,0.624696290151694  
"Kif11",206.793256217329,-0.856920319092819,0.400244838824693,-2.14099

030385786,0.0322748199878473,0.0831520137583307,-2.13123354777694  
"Rpa3",635.531448600682,-0.0882045490592144,0.146333674051495,-0.60276  
3168702886,0.546666251932,0.67654069058522,-0.0344670463750869  
"Mlkl",290.259270365444,-0.93128157502899,0.33450271303199,-2.78407779  
293535,0.00536801576158625,0.0209834746029288,-3.59849070112491  
"Phox2b",2.69547191976165,-0.951970288176452,1.46917883188371,-0.64796  
0797907688,0.517010305876795,0.650617461209871,-0.409188651061908  
"Tnp03",4082.46524457557,0.45077453261396,0.19005896800469,2.371761445  
12601,0.0177035168001636,0.0523242641457617,1.32991788300934  
"Ttll5",424.67840125927,0.134648638513526,0.159814016379316,0.84253334  
9477555,0.399489480606943,0.543753176824292,0.0820360098637052  
"Zfp715",1363.51137610103,0.0843134184017901,0.137822200768356,0.61175  
4985276281,0.540699876447009,0.671287245524596,0.0336037998799322  
"Retn",5895.27062357039,-3.61830146788352,1.56988546508194,-2.30481875  
803256,0.0211767260979215,0.0601199483775878,-10.1725418571233  
"Cdh23",48.4359163681,-4.59850913406841,1.05958386856867,-4.3399199161  
8396,1.4253465121974e-05,0.000223859249642613,-38.6481380733364  
"Rps5",18047.6008109272,-0.359286904993277,0.228627456854084,-1.571494  
99861945,0.116067715223801,0.220724501261453,-0.542825011639515  
"Podnl1",297.556323897942,-1.59778082025507,0.3193394804254,-5.0033926  
8457075,5.6330030338211e-07,1.73785273976968e-05,-17.5121174536184  
"Adgrl1",3527.02404091511,-0.0325816120125978,0.283637043919072,-0.114  
870792483277,0.908547536036251,0.943836105153968,-0.00188330662165491  
"Amotl1",3402.8210095476,-1.07997758889723,0.238199758420848,-4.533915  
55078381,5.79001861057407e-06,0.000110897625608029,-9.83525122422711  
"2200002J24Rik",2.83402418175693,0.518287804604956,1.73567741984364,0.  
298608369665629,0.765238878599208,0.847955652132721,0.0854796224670802  
"Etv5",665.263565470689,-0.00501402701178931,0.254598648546305,-0.0196  
938477105756,0.984287598645118,0.989769963815499,-5.15578490493494e-05  
"Tmem190",1.87008671873307,-0.597364519640158,1.2723156095237,-0.46950  
9699612808,0.638705353345967,0.752786575809673,-0.169635707286633  
"Gfod2",1160.26235349029,-0.288049575404521,0.115086371454435,-2.50289  
909886129,0.0123180656564838,0.0397381434736702,-0.929087705492131  
"Enkd1",626.431843692469,0.479823219214593,0.26941495238575,1.78098214  
284551,0.0749153680094688,0.158067292008292,0.885146416559289  
"4933405L10Rik",3.16157787229646,-0.847164487964381,1.17914461837236,-  
0.718456815868583,0.472475665584672,0.610371067883783,-0.4182351101105  
54  
"Atp6v0d1",4240.11163732374,0.232108725250991,0.170265918618226,1.3632  
1306773923,0.17281537000184,0.298221859819639,0.280832425629322  
"Ptprs",4654.5109095341,-0.983989106957544,0.187987664766334,-5.234328  
05115501,1.65586136182437e-07,6.66807296013809e-06,-11.7273589516455  
"Slc41a1",1105.37571329767,-0.275177571961155,0.129970985452054,-2.117  
22309409331,0.0342409182919069,0.0870556037104708,-0.671765756512001  
"Fer1l4",1021.79379933638,-3.27530902098234,0.770272819265385,-4.25214  
149982084,2.11736000510423e-05,0.000300461900807526,-26.5633771522894  
"4931406B18Rik",1.69174801777026,-1.00735587072103,1.38491603289743,-0.  
.727376856641268,0.466995127942129,0.605537740547691,-0.50532837550644  
1  
"Iglon5",170.149732425501,-1.28804502662911,0.441750685350518,-2.91577



369168556,0.00354807758755428,0.01535977282463,-5.37888033512207  
"Igf2bp1",234.96213755088,1.06301805303403,0.382536449468972,2.7788673  
5893975,0.0054548794295042,0.0212215114009021,4.09553209182689  
"B4galnt2",6.2965127204864,-1.71583631812918,0.908128669751904,-1.8894  
1983144077,0.0588355956417235,0.131564182111945,-3.48016297625935  
"Zfp651",1295.30180775774,-0.275157809001607,0.156548396203374,-1.7576  
5332430583,0.0788065142567904,0.16439172087075,-0.496798292906809  
"Nelfb",3841.52091887558,0.0286502995641721,0.120121960978743,0.238510  
088669316,0.811485491482108,0.879810136779931,0.0036686464619501  
"Card14",224.06279984055,0.137500827547357,0.196076826484322,0.7012599  
60255173,0.483140796453229,0.620735322169548,0.0655673383925363  
"Tmem175",1194.09189933634,0.272676854810605,0.0954839211268169,2.8557  
3583062691,0.00429372220848485,0.0176958350498917,1.10009458583121  
"Bcas1",69.3310187621699,-1.99657761820699,0.419902352673199,-4.754861  
70890994,1.98582302489366e-06,4.74093718717351e-05,-19.8793056632574  
"Tango2",2472.94550867125,0.934445811035078,0.19885768174515,4.6990682  
1217315,2.61351158840056e-06,5.89794548039748e-05,9.09993363721444  
"Aldh1a2",1712.07956381731,-1.5939884682859,0.482449356645675,-3.30394  
982671016,0.000953328922409236,0.00566017275552232,-8.24777591034065  
"Ndufs2",15934.0989284476,0.650560183151357,0.33103250327576,1.9652456  
3815844,0.0493858140992354,0.115249872075022,1.40563462084712  
"Snx31",1564.47099714442,-1.37964233059695,0.543700984177646,-2.537501  
99235647,0.0111646732620736,0.0369411970186858,-4.55065075572005  
"Atraid",4041.97041255492,0.602224694269166,0.183321531629618,3.285073  
4385413,0.00101955793368531,0.00596260965536775,3.08474365287722  
"Cad",915.778689713282,-0.614244983314692,0.174518094914216,-3.5196635  
8340449,0.0004320944868835,0.00307705562646256,-3.55265914237102  
"Lypd8",6.28545583235673,-1.18097228442444,0.811116846979008,-1.455982  
93121756,0.145397338172908,0.261793083359069,-1.58274005399827  
"Sh3bp5l",1668.28710792264,-0.0376296279042443,0.147133197509572,-0.25  
5752124885318,0.798142243427474,0.871098654483565,-0.00519289026043572  
"1810065E05Rik",0.340746372225417,1.08565208692275,3.15975245357748,0.  
343587702794114,0.731156374051315,NA,NA  
"Atad1",3622.01674484288,0.0645695114131391,0.200464483949113,0.322099  
506811041,0.747377311896472,0.835782134929573,0.0115829505737639  
"Pten",6767.47829567976,-0.285791883064279,0.182280957037756,-1.567864  
7276637,0.116912705046179,0.22211477374943,-0.429991330473666  
"Pea15a",7879.52653559086,-0.934643918589764,0.165834270162264,-5.6360  
1189112023,1.74033367564766e-08,1.2429679856329e-06,-12.7092959508525  
"Timm23",5296.97140669292,0.338211334531749,0.298397097939806,1.133427  
02347586,0.25703497109459,0.397909318491649,0.311672277566081  
"Tnfaip8l2",382.459022958602,-1.24098108067678,0.410141260876475,-3.02  
574063878577,0.00248024954394445,0.0117549600407946,-5.51427460781474  
"Trnt1",1282.71758908729,-0.0909528259613176,0.137657068970687,-0.6607  
20343978017,0.508791674634149,0.64318076193054,-0.0401401626128082  
"Ly6g6e",38.2590086690415,-0.732602660838039,0.373490876485375,-1.9615  
0082093565,0.0498206293305832,0.116043797716845,-1.57787052122717  
"Ehmt2",7791.63253239609,0.187049907446428,0.110560741964371,1.6918293  
430656,0.0906785170817916,0.1830468709039,0.317613180810861  
"Elof1",2590.16428417814,0.40474734308872,0.145131333176455,2.78883501

053916,0.00528980059101786,0.0207818923884075,1.56785894770705  
"Med16",1664.08369537304,0.17869977237763,0.128684281632313,1.38866822  
047641,0.164933662085663,0.287671217760645,0.222648668298926  
"St3gal1",1548.21192804647,-1.07006299781781,0.222604540742198,-4.8070  
1334415756,1.53201768649858e-06,3.85435881952896e-05,-10.8758215441273  
"Tmem259",8721.62947932127,0.5026105702197,0.180819496453076,2.7796259  
8104088,0.0054421539461642,0.0211883222129212,1.93721447812303  
"Rnf170",1196.37344611544,0.0597645823296455,0.110010286246071,0.54326  
3583515856,0.586948333796296,0.710341916228675,0.0204400162353959  
"Clip3",323.780547936241,-1.24669097036353,0.307800135684086,-4.050326  
25340713,5.11462736451365e-05,0.000588068177193943,-9.27371981469974  
"Thap8",6.62126614909461,-0.467702712805266,0.741161362604492,-0.63104  
033265,0.528014153125235,0.660525341387034,-0.193965570266751  
"Myl2",4.60731679512612,-0.748283649933364,0.717612201812276,-1.042740  
97910212,0.297068273107878,0.441380567633727,-0.611982144745763  
"Dedd",2196.34400944085,0.113513937378831,0.101121485719602,1.12255013  
433636,0.261628603793409,0.403259645593983,0.103090479511976  
"Mcomp1",155.742038614691,-1.51484197748264,0.501509749282649,-3.02056  
336820858,0.00252304906877501,0.0119149011471998,-6.710697645129  
"Nit1",5591.88492811231,1.14477200065963,0.22448127194072,5.0996325473  
5094,3.40313488664898e-07,1.18278652441857e-05,12.9874982751405  
"Pax5",136.016480314734,-1.72135966556253,0.897926825180538,-1.9170378  
0006398,0.0552331296193639,0.125370845322277,-3.5743674917823  
"Prdm15",576.292697503994,0.0470022167790151,0.245849055465015,0.19118  
3231068804,0.848382040965873,0.903082002224851,0.00479149616668128  
"Rnf168",1817.68315431408,0.262008976950857,0.20985067710678,1.2485495  
9041918,0.211829859700688,0.345929290935308,0.278128001422969  
"Tctex1d2",676.313032724942,0.514649146702583,0.209050057648597,2.4618  
4647108628,0.013822382107687,0.0435042463818695,1.61337192590011  
"Chp1",6566.41460377192,-0.494354742088964,0.381126451236954,-1.297088  
51349605,0.194600733272265,0.325051409007336,-0.555541981435887  
"Trpv4",4659.92239595912,0.704344212185094,0.167219718889066,4.2120882  
445231,2.53020654895941e-05,0.000345234200781039,5.61453023429099  
"Klhl3",1821.80161353928,1.66430066021971,0.427771566383071,3.89062946  
444019,9.99845136698783e-05,0.000991102210236546,11.5114565441459  
"Tvp23b",1798.08796521369,-0.0706361059766005,0.19920942453276,-0.3545  
82149626081,0.72290265086743,0.817110486180472,-0.0142671484437144  
"Dnajc7",7564.85065349899,-0.0290219077768388,0.103747705076174,-0.279  
735419260891,0.779680502077835,0.857497366018682,-0.00446174601735583  
"Zfp385c",17.3150135932834,-0.900155023627203,0.63801215320107,-1.4108  
7441533973,0.158281647296348,0.279165586520506,-1.14855295824888  
"Cacybp",2904.26767506201,-0.254707315603153,0.220109446771312,-1.1571  
8484299217,0.247196848922041,0.386484176111134,-0.24214116546623  
"Cluap1",1409.8169363914,0.493874707351709,0.133663742446693,3.6949040  
8027946,0.000219969812188462,0.00182431790644433,3.11464509694155  
"Zswim7",535.685297862578,0.531757272417244,0.325515575404052,1.633584  
72711234,0.102346076886785,0.200819543840045,0.853655774745784  
"Pigl",507.49871027283,-0.192634141041093,0.243033283823375,-0.7926245  
24553149,0.427996615782771,0.570903493450632,-0.107978196901576  
"Ndufa2",7519.94564397401,0.797647594804494,0.310370391791366,2.569986

10660221,0.0101702593667713,0.0342901119026988,2.6903841759084  
"Pam16",412.428683908515,0.192766908576112,0.300087632628234,0.6423687  
20389495,0.520633804286483,0.654079762627439,0.0818345595715096  
"Glis2",5591.8475408016,0.733840050988324,0.36291600118616,2.022065846  
06309,0.0431695498397698,0.104018769497755,1.66081500338425  
"Cox6c",19868.8702935465,0.950881396920893,0.316815773317293,3.0013701  
2423488,0.00268767662599232,0.0124594196038037,4.16987960092148  
"Bicc1",16931.4360154342,0.139076042674792,0.367736915557606,0.3781944  
01462004,0.705286184143761,0.804213269037301,0.0303033881105645  
"Ube2z",3699.0181152177,-0.422719910439818,0.241424000620376,-1.750944  
02111462,0.0799555530108261,0.166201852090095,-0.758592967616936  
"Gip",2.54720992999642,2.27494895413671,1.07683001028982,2.11263517212  
381,0.0346320058797795,0.0877523281133641,5.53548970847591  
"Tmem87b",2934.56958320203,0.129225215787404,0.131564240427657,0.98222  
1425573925,0.325990774441447,0.470897030675606,0.0973215553072991  
"Anapc1",3130.21615405635,-0.139208420882393,0.138952277763324,-1.0018  
4338913469,0.316419237690193,0.461683562224443,-0.107590785247014  
"Mertk",3216.89496924526,0.305510969692939,0.260495467157625,1.1728072  
3932166,0.240873114402137,0.379242892814346,0.296216837493926  
"Tsg101",2793.09193200927,-0.0821749216168696,0.189206057963953,-0.434  
314432112556,0.664060125061746,0.772267942171891,-0.0212359484272539  
"Hps5",3993.08401589915,0.764847164796814,0.235074652428612,3.25363520  
437017,0.00113938490925529,0.00649582659668409,3.85222568923274  
"Map3k4",1913.74543704555,0.121813558520912,0.146397808709537,0.832072  
280279811,0.405368147125306,0.549184834119596,0.0730053286873693  
"Piezo1",5631.09540737001,-0.191661667129955,0.14760585573617,-1.29846  
926583002,0.194126130835842,0.324564508578052,-0.215671309858097  
"Blk",48.2310465599777,-1.48678981666786,0.615081734946803,-2.41722316  
270121,0.0156394254497217,0.0476434965580068,-4.52580179381888  
"Rnf166",1763.31009719451,-0.0891510536294858,0.17423238792677,-0.5116  
78997747284,0.608875687270645,0.728826702093624,-0.0282001984566166  
"Ankrd28",1671.86310912273,0.384139908790147,0.137801830734159,2.78762  
558337278,0.00530958703539992,0.0208260567322928,1.48721699785266  
"Ankrd52",1442.2900849292,-0.941027626169348,0.27623900242338,-3.40657  
046222269,0.000657845674337759,0.00426418715366942,-5.13566175304078  
"Pkd2l2",124.182997683599,-0.979114815426892,0.551873528997907,-1.7741  
6520992549,0.0760358269772002,0.159809598618809,-1.79547351053798  
"Srp19",1686.90917895931,0.280005655803837,0.184706785887983,1.5159467  
7184004,0.129532812221219,0.239533106835844,0.400145901297454  
"Tmbim7",0.177617859711189,0.0542912073317471,4.78471990596491,0.01134  
67890281445,0.990946766486904,NA,NA  
"Clec4f",0.994735386562561,0.100254903476089,1.5999307599472,0.0626620  
263738145,0.950035636503603,NA,NA  
"Klra17",7.85925785029349,0.482499681951345,0.693567802373817,0.695677  
740950393,0.486630668375187,0.623575497632716,0.227877571874622  
"Wdfy2",1505.43584957023,-0.0956387898534868,0.127434947151847,-0.7504  
91070079288,0.452959000057994,0.593533876105432,-0.0498910256094328  
"Rbsn",1446.60244525571,0.0551505243385019,0.121092407117925,0.4554416  
38754393,0.648791545077809,0.760544552752186,0.0150958338124654  
"Mrps25",1781.66981434567,0.449055980964406,0.166212638875232,2.701695

7555285,0.00689868569299121,0.02549480167588,1.64771244572017  
"Dguok",1158.78011265016,-0.203817591138063,0.118537468474733,-1.71943  
600416528,0.0855350110743068,0.175015737269115,-0.355229477252813  
"Camta1",1233.55199396779,0.615294497497045,0.19949597505811,3.0842451  
69948,0.0020406934993855,0.010140302595446,2.82496313322947  
"Csfl",2355.21589890273,-1.06371351284624,0.329225161198779,-3.2309605  
6502192,0.00123374960313945,0.0069073230774127,-5.29215887075898  
"Strip1",2595.17936405725,0.338656092366405,0.155063926036202,2.183977  
28616351,0.0289639171523317,0.0765539455925395,0.87026474971357  
"Kif1a",358.667244435533,-1.27521492066222,0.418375895259564,-3.048012  
4096802,0.00230360414155908,0.0111397999881248,-5.73493607162967  
"Alx3",0.363908822403663,-2.30232936345835,3.70917969742878,-0.6207111  
95268953,0.534789662041733,NA,NA  
"Slc25a11",5033.20865479598,0.599996489410645,0.193291323392829,3.1041  
0461721172,0.00190855831704213,0.0096282199393758,2.78581784949268  
"Chrne",19.0364650638977,2.40190302391836,0.564435117825111,4.25541031  
743987,2.08665992334376e-05,0.000296975877265377,19.5079192382571  
"Cmc2",618.90984290226,0.566487138369716,0.331829765751749,1.707161915  
04508,0.0877919616479144,0.17858817613052,0.975871993774292  
"Chfr",1898.10291926253,-0.115647737698809,0.115760524837375,-0.999025  
685666813,0.317782248653106,0.462845916503941,-0.089090515420714  
"Ceacam16",12.4465401581146,-0.374731458367823,0.877510210554016,-0.42  
7039427987095,0.669350610052,0.776313695387516,-0.094881478330534  
"Hoxa2",235.275203095267,0.170419272407399,0.303648891134184,0.5612379  
21109647,0.574635354959472,0.700352553506675,0.0606984747361213  
"Adam28",232.708527535004,-2.23196048177185,0.640719659046318,-3.48352  
114728933,0.00049486402394011,0.00343375755828621,-12.6643672360771  
"Ankrd53",5.4672142011239,1.82801063275292,0.946308011175221,1.9317290  
0489631,0.0533929628163218,0.122218359825387,3.84237963648513  
"Tex261",4251.40586415459,0.163884541976554,0.108108964442352,1.515920  
00554166,0.129539581030574,0.239533106835844,0.234201439859023  
"Fam120b",2122.59389042537,0.161863505463167,0.119399470066183,1.35564  
676604884,0.175211584550335,0.301444937400727,0.194101521283961  
"Tbp",1101.99263633275,0.160853428543764,0.141131576677807,1.139740888  
1145,0.254394267117996,0.395076019137131,0.149380892181006  
"Psmbl",6440.01077441869,0.265290948476951,0.212014198178282,1.2512885  
9650177,0.210829204422046,0.344687894333478,0.282565614114628  
"Pdcd2",986.313844382736,0.672502957766843,0.167726554989154,4.0095198  
8676051,6.08423290818052e-05,0.00067327113078152,4.91153284290096  
"Dll1",800.454537944964,0.643743038812688,0.153236690799367,4.20097194  
382475,2.65771528949906e-05,0.000355175686872191,5.11318529441136  
"Nol3",676.769186952011,0.0207158795090698,0.450410967579642,0.0459932  
839122236,0.96331560290811,0.978046740493088,0.000459847326658771  
"Fhod1",2655.57827102024,-0.442757855101993,0.195730710501497,-2.26207  
65743279,0.0236926726504797,0.0655787329485482,-1.20629547130234  
"Plekha4",22.1517204012992,-0.0981822268482989,0.542113897539883,-0.18  
1109961013452,0.856281266134402,0.908613449093255,-0.00940934513498279  
"Slc9a5",391.828126798362,-0.685937135425043,0.307959939143167,-2.2273  
5832892264,0.0259233350884849,0.0703996128093726,-1.8201805003763  
"Elmo3",1680.39373480128,0.922059338403118,0.190911797898405,4.8297661

4621689,1.36693494512775e-06,3.50229928516438e-05,9.45987310589896  
"Stc1",616.490626554806,0.0797577131037501,0.255257474791394,0.3124598  
5320873,0.754691069240529,0.840663075185777,0.013843093504114  
"4931428F04Rik",375.374703076466,-0.263507871618348,0.173536253905661,  
-1.51846006634209,0.128898459206733,0.238709236470596,-0.3774774112333  
35  
"Tppp3",586.002816792848,-0.823152550271278,0.248192520956094,-3.31658  
88605358,0.000911236043078407,0.00548477384594356,-4.28515060364305  
"Msh3",1189.09183548856,0.911444828911098,0.21882141136159,4.165245179  
80092,3.11018137996436e-05,0.000401990692825569,7.12666151101291  
"Adamts13",412.787097631842,0.858262901337324,0.249386465090456,3.4414  
9752082985,0.00057850377263659,0.00385497831813678,4.77055983918919  
"Tmem208",1882.01278801741,0.227615811439555,0.191921794240296,1.18598  
209411573,0.235629370868634,0.373547375204309,0.224135666108972  
"E2f4",1744.29609281411,0.0449770791936048,0.124706134067252,0.3606645  
29696264,0.718350243636584,0.813426624683554,0.00928774676946153  
"Surf4",9371.96410435958,0.257517019579609,0.163571189809575,1.5743421  
5572682,0.115408368858116,0.219770717452441,0.390182183457827  
"Surf2",1620.63281727912,0.43986272469771,0.143558458864496,3.06399726  
060653,0.00218400909945144,0.0106994496032925,1.99590481489461  
"Dnab9",2394.70499850118,-0.65047615398205,0.301509497833684,-2.15739  
855180569,0.0309746239749032,0.0805850942630228,-1.63818619381561  
"Naf1",621.773595808331,0.0472914245456284,0.156214936510136,0.3027330  
52306812,0.762093306926066,0.84576784668703,0.00792180402032109  
"Yes1",1502.25868494379,-0.0983621306060117,0.14391038325926,-0.683495  
717114508,0.494293655600873,0.630247037464415,-0.0454082297318251  
"Ppp1cb",8843.27835963325,-0.152817324028337,0.223364084443915,-0.6841  
6247136951,0.493872577189272,0.629916105843948,-0.0706273738657599  
"Gorasp2",3489.06865553785,0.128024334060116,0.101555292100518,1.26063  
675670786,0.207439749285042,0.340516941535591,0.137919386017783  
"Tsen15",831.021194565032,0.359988462789364,0.12991995982869,2.7708480  
1491655,0.00559105171831905,0.0215827215212403,1.38086614188196  
"Oc90",2.01982942014078,2.25345478893168,1.51234553424572,1.4900396357  
2094,0.136213814549188,0.248842589345083,3.13440858187727  
"Efr3a",4169.51582896111,0.314547990953814,0.158358477143624,1.9863034  
5926182,0.0469996387755931,0.110984492775404,0.691491228756113  
"Trappc2l",1537.27442270569,0.220174463934665,0.226466845320336,0.9722  
14999609455,0.330943599957099,0.475725325270092,0.163570832403977  
"Acsf3",2197.36397475755,0.418709583339402,0.409162230589488,1.0233339  
05322,0.306149998086416,0.45065020856779,0.333738264641736  
"Ddx19a",1173.20579903141,-0.281445553307193,0.132826469928095,-2.1188  
9658333579,0.0340992077689101,0.0867858442864128,-0.68794067430563  
"Galns",3464.51735990197,1.45388720639934,0.366461189694829,3.96737020  
804322,7.26700645257522e-05,0.000773006501976605,10.417426193264  
"Gata2",1773.89720843522,0.104988611980293,0.307756081417766,0.3411422  
82214647,0.732996471732148,0.825266497622903,0.0201629492688716  
"C8g",447.796202109386,1.72774562805374,0.397738364001899,4.3439250130  
9098,1.39959306534647e-05,0.000220965713264174,14.5433040282565  
"Entpd2",764.866858472309,-0.720394706619097,0.259759367372662,-2.7733  
1560322746,0.00554882774594661,0.0214537067996167,-2.7676540496225

"Rabl6",5622.9366429292,0.510992450745539,0.213884576850742,2.38910377  
863352,0.0168895307498558,0.0504770187861264,1.52594462436426  
"Ptgds",705.008177797218,-0.661539165185763,0.413787818161366,-1.59874  
006954884,0.109878370314586,0.211595897717906,-1.02742123965766  
"Edf1",9292.21839658996,0.672828954252386,0.191178445005858,3.51937664  
432707,0.000432562138200391,0.00307926125251231,3.89101395569578  
"Clic3",563.737252606899,-0.300725716457002,0.53490518221144,-0.562203  
782011836,0.573977184935224,0.699881038727666,-0.107312439135463  
"Npdc1",3435.41058146075,-0.175375070145975,0.159703643746997,-1.09812  
817059957,0.272148525840571,0.414753162172851,-0.154342640620075  
"Fbxw5",3030.77083261661,-0.00969331780632922,0.106631155858728,-0.090  
9051180048311,0.92756798345394,0.955515781951002,-0.000441084718751439  
"Slc25a13",1983.68117467644,1.77712241174046,0.434799692806308,4.08722  
094597274,4.36571308168811e-05,0.000521585010212958,13.4326255000296  
"Ube2i",4449.07884422729,-0.296303276687964,0.087506609387798,-3.38606  
739263378,0.000709019691463341,0.00451337445124134,-1.60024812570597  
"Tsr3",1142.25599468117,0.463432154464843,0.147234854258745,3.14757097  
969768,0.00164633129829875,0.00865000475727,2.20139329208861  
"Unkl",2249.91890537182,0.282087744833227,0.152385216383873,1.85114902  
565497,0.0641481167411691,0.140305906795297,0.554000638753193  
"Lrrk1",2538.18176978375,-0.528164577452854,0.232871671391225,-2.26804  
992765967,0.0233261637637834,0.0648715485999973,-1.44471293805246  
"Aldh1a3",584.475577852637,-2.78114380881417,0.865822583622,-3.2121405  
255795,0.00131749913649982,0.00726076827684386,-13.6978831451333  
"Actn1",6046.06163064227,-0.890674660040863,0.308664470334199,-2.88557  
558657952,0.0039069863092322,0.0165066996874127,-3.65531895290106  
"Sirt2",3691.96112136209,0.159404504317426,0.149930158460043,1.0631917  
284334,0.287695012730469,0.431697503326049,0.133904591233252  
"Hnrnp1",12938.1520086495,0.00585741725510665,0.108319710714863,0.0540  
752667861672,0.956875197653751,0.973609630735731,0.0001566557193783  
"Nolc1",2017.44880931629,-0.0733419300645932,0.130347696540762,-0.5626  
63798524878,0.573663839833725,0.699642597594282,-0.0261966849030995  
"Casd1",1684.11101389692,-0.167834037985262,0.0992800694182323,-1.6905  
1088469968,0.0909302576418166,0.183460074865495,-0.284605947969491  
"Cnksr3",974.019572497565,-0.181496000038044,0.158502407155929,-1.1450  
6778347848,0.252181079671308,0.392357699603508,-0.169804273874488  
"Mtmr1",1466.29423177254,-0.0911983656884885,0.148821287046015,-0.6128  
04575868841,0.540005564876179,0.670766930238628,-0.036418567054966  
"Hmgb3",2627.67509044198,-0.124996023507566,0.124474810888314,-1.00418  
729392343,0.315288345338532,0.460555300974729,-0.0969122096263373  
"Map2",323.108533137625,0.840514010671468,0.264279355071715,3.18039981  
005473,0.00147071985966006,0.00792376231656586,4.06631360927257  
"Cyp2j9",658.654571595127,1.5263749981544,0.299572114982141,5.09518383  
66044,3.48403005485873e-07,1.20446131222758e-05,17.289086345736  
"Abca1",3363.36288109914,-1.43346852618172,0.263419857927283,-5.441763  
34108199,5.27557320539508e-08,2.84152282759097e-06,-18.30707087197  
"Nipsnap3b",1014.60319694416,-0.375871099652435,0.215150624616906,-1.7  
4701375058384,0.0806349529327467,0.167293074301202,-0.672060558981296  
"Lage3",1613.98502274974,0.0427898492791767,0.251024877640078,0.170460  
592119197,0.864647923685158,0.914852681572238,0.00380796412648836

"Ubl4a",2136.7034273481,0.273813590023102,0.128204613833713,2.13575457  
103479,0.0326994237824946,0.0840239015433684,0.678141517079003  
"Gdi1",9205.78333039555,-0.217430362461169,0.112985453910635,-1.924410  
22216138,0.0543031841511971,0.123749822882193,-0.454319287490261  
"Sash1",3896.90048139577,-0.757904543166568,0.145097793131969,-5.22340  
503468059,1.75662572455548e-07,7.004230752021e-06,-8.99556614154488  
"Gadd45b",1057.11558808621,-0.693707876879138,0.328756924617687,-2.110  
09358262447,0.0348502959471158,0.0881223019552411,-1.68503699057634  
"Slamf6",166.598256695521,-1.65951731973769,0.648959122486186,-2.55719  
853876161,0.0105518973716514,0.0353749819381806,-5.54569272280068  
"Slamf1",79.1531146294252,-0.545865878810587,0.47609601008883,-1.14654  
57958968,0.251569389694837,0.391562222421165,-0.511809766683241  
"Zdhhc12",732.352925835911,0.434131166393046,0.144917102769184,2.99572  
07127202,0.00273797076869256,0.0126384834393863,1.89759118274753  
"Endog",1553.12551297856,0.985071627308923,0.325844703424746,3.0231322  
3739856,0.00250172897732405,0.0118337485686231,4.37056558078475  
"Cybb",2208.00582819724,-1.08099338835217,0.426747760996661,-2.5330968  
0132247,0.0113059725747261,0.0373190880755054,-3.55457687524893  
"Golga7",4106.14191962926,-0.298202803178031,0.0870749505956102,-3.424  
66807202604,0.000615550970720481,0.00404244285183831,-1.64336764809955  
"Xk",101.40656335022,-1.6561861949659,0.414721897876946,-3.99348624570  
897,6.51088571917787e-05,0.00071040430751276,-12.0068138106711  
"Pcolce2",229.749032492615,-0.610292082524431,0.326923408056929,-1.866  
77389102146,0.0619331700085334,0.136727009604437,-1.2143402494863  
"Cd48",624.579440452189,-1.21523662458076,0.406345482496425,-2.9906487  
8761498,0.00278385472103319,0.0127867136279635,-5.29764013267765  
"Clpx",5052.72253866277,0.132295065930441,0.283986728607432,0.46584946  
6202764,0.641323254822597,0.754830425119582,0.0372095956636718  
"Trabd",3582.49783477543,0.147419795615948,0.129109798258558,1.1418172  
5635355,0.253529987919209,0.39392979750482,0.137333711255277  
"Mov10l1",0.126703529248624,-0.545046838331149,4.78471990596623,-0.113  
914053286904,0.909305925174374,NA,NA  
"Dennd6b",1628.26090472482,0.52142732489074,0.254511997982265,2.048733  
76903463,0.0404881552187402,0.098827998304331,1.20677801606667  
"Cd83",863.877099016092,-1.28909045562039,0.429410667494401,-3.0019991  
4255088,0.00268212931205276,0.0124415604964143,-5.65486954750485  
"Cltrn",37523.0711484794,2.03699583475447,0.916674406117699,2.22215851  
250997,0.0262725951058647,0.0712069862905408,5.38207776207901  
"Ace2",1601.58475543186,1.70343797469563,0.41503595062446,4.1043142699  
6301,4.05515902476756e-05,0.00049386315218562,12.968702736403  
"Gzmb",28.4383692879208,-2.00783555352541,0.768785172476243,-2.6116991  
1362652,0.00900935073042146,0.0311959368747572,-6.96210436861567  
"Ager",526.774647158077,-0.146194466993186,0.345559500989264,-0.423065  
974382596,0.672247126676551,0.778475373929642,-0.0366097144752647  
"Atf6b",2123.55811419072,-0.196100186281461,0.0811674009958639,-2.4159  
9686420235,0.0156921964885252,0.0477401228168614,-0.596533449722805  
"Egfl8",409.593734134716,0.0441155034641803,0.247896988640087,0.177959  
013161834,0.858755164627908,0.910643835313807,0.0041293619245172  
"Notch4",1586.02227935916,-0.0714824698969621,0.225139803791852,-0.317  
502585917902,0.750862277626501,0.83797794569066,-0.0126354913273039

"Ppt2",4828.03526225677,1.01817889947159,0.201089982109357,5.063299965  
47456,4.12060716992358e-07,1.36175590846051e-05,11.4078296142257  
"Prtrt1",412.384012495814,-0.868812317388889,0.278799925473161,-3.11625  
735162732,0.00183162349324985,0.00933185128596433,-4.06110840816677  
"Rnf5",4584.1550444859,0.804790385834089,0.166413956284953,4.836075073  
2711,1.32427923723433e-06,3.42450882859351e-05,8.27482852003328  
"Fam163a",260.218896201987,1.14451807071172,0.645987928191691,1.771732  
9082535,0.0764389042432687,0.160431189982266,2.09434234545654  
"Cacfd1",2362.46136264752,0.212257626351471,0.116783581966405,1.817529  
67992136,0.0691360479789024,0.14874714669126,0.4044584812528  
"Hivep2",1603.66429823566,-0.569627564713686,0.188501883037836,-3.0218  
6670782143,0.0025122114397007,0.0118746905821295,-2.52535607733481  
"2310057J18Rik",0.222265746865732,3.19052280584978,4.69750997731396,0.  
679194471381224,0.497014649864957,NA,NA  
"Arnt",2421.34310201524,-0.362528480143661,0.131113231545949,-2.765003  
01204621,0.00569222701981948,0.0218952539815427,-1.38539728627373  
"Itga2",338.747739917435,-1.57288011535515,0.375241529955128,-4.191647  
2186414,2.76936392177623e-05,0.00036657880344055,-12.4435218064542  
"Mocs2",4575.56323993436,0.556371143820242,0.252186648247128,2.2061879  
4725021,0.027370842829857,0.0734282737337029,1.45293331866649  
"Nat9",1328.0752655073,0.550481541451102,0.206102816976711,2.670907411  
77644,0.00756465094275814,0.0273139933484997,1.98192959290109  
"Lpl",68580.8910637485,-0.337731056562513,0.57539280462055,-0.58695738  
6068174,0.557232327062496,0.686379430794964,-0.127096537882303  
"Atp6v0e",5778.1015203784,0.0791463369427525,0.28924424317547,0.273631  
502822127,0.784367821884372,0.860690179025352,0.0118735871168785  
"Nkx2-5",0.182624878335611,-0.546804771982973,4.78471990596623,-0.1142  
81459046567,0.909014679736066,NA,NA  
"Zfp318",2231.7707874425,0.671915493437193,0.3081968893601,2.180150146  
33104,0.0292463336533231,0.0771122398340087,1.72177892208137  
"Ttbk1",332.921759504543,1.58607035869014,0.548106846782341,2.89372476  
917805,0.0038070170414561,0.0161754670460473,6.54136584671782  
"Srf",1256.30817089929,-0.670394097935763,0.147388400826464,-4.5484861  
3714922,5.40332020017441e-06,0.000105248688574426,-6.1402632612612  
"Gata3",2777.72085886163,-0.623937886774808,0.365243965866269,-1.70827  
705611777,0.0875849464885124,0.178260050796766,-1.07598827024817  
"Gata5",47.537597707678,-0.0896170235348902,0.297282288716519,-0.30145  
4297603134,0.763068095194481,0.846396995439143,-0.0149451413454839  
"Lama5",11944.0527964655,0.0389557768543096,0.236619600997608,0.164634  
614757479,0.869231584328072,0.918012909442399,0.00333242619252193  
"Steap1",286.339628611824,0.14988393490169,0.384302797213899,0.3900152  
06728424,0.696525302264414,0.797506851713595,0.033913466478054  
"Steap2",3681.9540332008,0.982094445274097,0.375110825381342,2.6181447  
6901776,0.00884092885858315,0.0307492741499562,3.41954373782029  
"Hspa8",95996.5806957782,0.572217188626038,0.184164047874166,3.1071058  
397729,0.00188928744029936,0.0095582061522981,2.66101318466396  
"Serac1",143.46088167923,-0.672894536380415,0.354729225997155,-1.89692  
443437353,0.0578379120492011,0.130041929097708,-1.3726364538188  
"Awat1",0.405013008858982,-0.0576317831671303,3.78970840355944,-0.0152  
074452781117,0.987866681876593,NA,NA



"Pdzd11",1398.0207036926,0.353737921396356,0.136774312563823,2.5862891  
5595019,0.0097015505085154,0.0330181238985919,1.20649345422448  
"Psm2",6118.26073497186,0.416821385135493,0.151260132442033,2.7556592  
6332392,0.00585739806011454,0.0224068172211327,1.58325019200307  
"Mrpl32",1388.30271999318,0.335980361361383,0.261005809887346,1.287252  
42363914,0.198006320369882,0.32904860091809,0.373458908841272  
"Setdb1",2295.24509921204,0.0946686035691503,0.122402466259218,0.77342  
0719878845,0.439273431465923,0.58122647711201,0.0513685846709763  
"Anxa9",433.529358675637,0.106229959698982,0.283251537668772,0.3750375  
39330872,0.707632548468254,0.80620658116361,0.0228835549346438  
"Arnt2",1511.47856169417,0.536336735124568,0.433984667358697,1.2358425  
8952926,0.21651708051839,0.351862813464541,0.560211182333619  
"Prune1",1301.36957463992,0.022448690459205,0.182785607409182,0.122814  
322075981,0.902254132744902,0.940153435242631,0.00138535780725108  
"Cers2",8205.32849935825,0.339535203111151,0.122820596964509,2.7644809  
7064099,0.00570134325116046,0.0219216704222297,1.29711941482081  
"Nlrp5",21.8134415200509,0.0280469436976451,0.53416485763646,0.0525061  
566605963,0.958125389797813,0.974604489440235,0.000721466738088612  
"Capza2",5215.66567684694,-0.457817187876433,0.191428961026116,-2.3915  
7745736276,0.0167761436757504,0.0502266721768623,-1.36942692712183  
"Plekho1",2920.27699720393,-0.612692714638042,0.307514428644551,-1.992  
40314458948,0.0463268426059212,0.109621453535225,-1.3544933735842  
"Vps45",728.455914618374,0.519931142394002,0.207755299973791,2.5026131  
341034,0.0123280217338479,0.0397429311221036,1.67694602125304  
"Prpf3",1386.68633703115,0.370644955778953,0.166349726748694,2.2281067  
9057436,0.0258733945768394,0.0703155716575755,0.983974144738925  
"Anp32e",4229.11885693712,0.00651573687256652,0.143872839913751,0.0452  
881647187376,0.963877620946479,0.978277333465954,0.000143099115527323  
"Aph1a",5692.27271266961,0.259855141149012,0.198190945717815,1.3111352  
8021101,0.189812063179308,0.319295626595648,0.296660471462482  
"Tab2",4428.98813493974,0.00920282352810705,0.0953768775775139,0.09648  
90418081448,0.923132176688388,0.95268858636282,0.000446035094453892  
"Ppil4",1474.65042015955,-0.152271118250669,0.140392537492236,-1.08460  
977321598,0.278094524581209,0.421705322778381,-0.131478268055632  
"Cnih1",2971.35448100602,-0.0796172979682662,0.38825314114838,-0.20506  
5431622197,0.837521004038924,0.896266988844728,-0.00871944218951498  
"Eps8",4241.20393237156,0.746322377142265,0.230595569981208,3.23649919  
728764,0.00121005566765189,0.00680128723201974,3.72462883522556  
"Med22",1876.7674131143,-0.231081590469952,0.236234455233767,-0.978187  
496998623,0.327981599114602,0.472637279873301,-0.173178791150239  
"Abo",0.873368776491107,-1.02439714539426,2.14612016315716,-0.47732515  
7733604,0.63313059915716,NA,NA  
"Surf1",1783.18847058731,0.0121066781728307,0.176039159096082,0.068772  
6426040405,0.945170594553977,0.966180992587472,0.000416519359175568  
"Med28",3703.716286495,0.430954427017714,0.27230348949607,1.5826254294  
987,0.113506863924073,0.21714647103528,0.658146348586086  
"Qdpr",10340.6863536361,1.19857544077575,0.378326347404766,3.168099311  
60679,0.00153439096092827,0.00820108414368955,5.7573438505167  
"Gnrh1",88.142252307156,0.467500289888776,0.319976734384523,1.46104463  
1223,0.144003193594047,0.259786664387188,0.630141072465798

"Tnr",1.58332643734244,-1.21076332224796,1.91877085780555,-0.631009855774382,0.528034080223597,0.660525341387034,-0.50212750926607  
"Sqstm1",16259.8037763102,0.562559693658393,0.154298219618906,3.64592472322645,0.000266431967058159,0.00211346236521562,3.4650457853209  
"Nfe2l2",5040.57369322163,-0.561180282250614,0.23333215831696,-2.40507046391909,0.0161693477204804,0.0489245719822976,-1.69334776073403  
"Rxrg",117.819177922047,-3.61940754560257,0.849295346214086,-4.26165945891126,2.02914488865487e-05,0.000291556868378723,-29.4629745043665  
"Rxra",4914.49352611731,-0.256332345201233,0.335255503391988,-0.764588030942847,0.444516898594778,0.585700127638936,-0.137124308262016  
"Adamtsl4",735.722408138731,-0.83958262070046,0.314191675166363,-2.67219881066519,0.00753559879596593,0.0272494631535133,-3.02478232407964  
"Fcrls",908.686238825219,-1.57801547641101,0.356129764095856,-4.43101261254385,9.37916025081052e-06,0.000162700059226249,-13.765979249648  
"Cd5l",24.4236609202477,-2.28902014861795,0.622018129965544,-3.67998943816114,0.000233243613989218,0.00190842802583373,-14.3326433481961  
"Prpsap1",3222.64451689424,0.171409727970952,0.110274401684048,1.55439272717221,0.120090766983497,0.226606965512845,0.254464287587385  
"Fam184b",75.6575110656225,-0.0102708088708309,0.473015317148889,-0.0217134805120866,0.982676510414864,0.988843275184532,-0.0001152325993941  
2  
"Ncapg",131.232227886142,0.0978737272429322,0.580822271336983,0.168508908960462,0.866182935551408,0.915880416343891,0.00860011280140619  
"Lcorl",692.326434015501,-0.182434788493335,0.180322880339263,-1.01171181466322,0.311675864849184,0.456784126039491,-0.142945751707172  
"Lta4h",2092.79496389442,-0.0180801871368884,0.130657472345294,-0.138378516072216,0.889941275348876,0.931963645610656,-0.00127395659812498  
"Amdhd1",94.9780216886828,0.852419706252143,0.350064293797406,2.43503756697182,0.0148902436938957,0.0459746589934408,2.62516707135127  
"Dstn",14662.1840297756,-0.28334294052925,0.256019764093586,-1.10672291856997,0.268413743336444,0.410666287474418,-0.252167948450482  
"Macroh2a1",6378.48937283663,-0.0843520092086039,0.131457921759357,-0.641665470438643,0.521090413557031,0.654569055761821,-0.035746541786341  
6  
"Gtf2ird2",1007.40598337625,0.370863504490181,0.256672365573078,1.44489066309163,0.148488599348165,0.265944997826071,0.491196015804997  
"Bo1a1",1093.08751667888,0.668407221597984,0.213073303595849,3.13698248592324,0.00170696323521339,0.00888714797334867,3.15698696299624  
"Castor2",4617.26769547363,1.10054998999331,0.241126600103289,4.56419984158481,5.0140300307894e-06,9.9630809135096e-05,10.1405106531043  
"Fcgr1",653.517018419202,-1.41973445930777,0.488997162371117,-2.90335930053983,0.00369182815747178,0.0158140610840868,-5.8874340666507  
"Ncf1",1245.84546620948,-1.33250048904302,0.369805341886018,-3.60324835289622,0.000314264994082864,0.00239544130360738,-8.04055820075918  
"Wnt11",144.749839500136,-0.404968546493327,0.337896965932681,-1.19849713765707,0.230723536664282,0.367536561918314,-0.405346170374885  
"Adss",3983.653445375,0.319319068411099,0.0858620727083746,3.71897693986082,0.000200031310388993,0.00169500673184033,2.03727755107619  
"1700016C15Rik",711.625193002531,1.39190206092173,0.598704030087353,2.32485834564809,0.0200795359385336,0.0576259628686383,3.9721851426888

"Il17rb",587.188397501883,0.173448093487693,0.358731333389726,0.483504  
164101713,0.628737803812784,0.744876911680844,0.0510867585658441  
"Cacna1d",836.530427574094,0.403148507139311,0.297245118732418,1.35628  
301941008,0.175009136134581,0.30122953181074,0.483730935648294  
"Chdh",9164.37931360743,1.0185308951359,0.212432500330575,4.7946095515  
0893,1.62991974200147e-06,4.00758828871937e-05,10.3123562467623  
"Actr8",1630.57953105881,-0.0141744105710006,0.161695866222448,-0.0876  
609334681481,0.930146170620011,0.956640470236786,-0.000628318201594055  
"Lrrc27",186.190478678023,-2.47313364564636,0.583719380297724,-4.23685  
3750487,2.26673674526125e-05,0.000316596225351747,-19.9282223836349  
"Stk32c",222.363247891462,-0.0779602878068116,0.306835627665591,-0.254  
078342857165,0.799435034370926,0.872022897947082,-0.0106758503400315  
"Fnta",3575.96204213766,-0.096155262436886,0.167947541021695,-0.572531  
528904403,0.566961932122192,0.694124309463676,-0.0351066915380977  
"Mtrex",2090.08803757168,0.373734899130506,0.11969036552771,3.12251447  
710703,0.00179313286389347,0.00918515849937256,1.75287883058155  
"Lbp",1004.91194732674,-1.57211826233944,0.270575091653398,-5.81028450  
450754,6.23667642306229e-09,5.60381183856537e-07,-22.6300899429505  
"Celsr1",1140.62658195676,0.361289329240529,0.489827893539936,0.737584  
229084074,0.460767141916482,0.600136121114734,0.18447389108848  
"Flil1",968.901832492065,-1.16678836154558,0.219745432729818,-5.3097274  
7442798,1.09789277420402e-07,4.88261201992845e-06,-14.2696235775697  
"Stard13",923.458437955333,-0.992185668276383,0.192764010339556,-5.147  
15203594611,2.64470970451903e-07,9.60270946344729e-06,-11.463182653409  
2  
"Tenm1",2.90634745671459,0.460342088442205,1.28684508878742,0.35772921  
8888327,0.720545964671237,0.815250114266801,0.0940296242055757  
"Camk1g",69.4896835953416,-0.265790523644767,0.449757345904446,-0.5909  
6427454736,0.554544358356745,0.684119322950953,-0.100900176771588  
"Utp25",635.129165730767,-0.129482605233861,0.178131405878821,-0.72689  
3747877035,0.467291047478838,0.605720040137108,-0.0649144700156378  
"Hsd11b1",3816.64597337096,-0.265858741148856,0.3815651161343,-0.69675  
8508330937,0.485953936335495,0.623024378237074,-0.125796282331527  
"Sytl4",361.372093145314,1.06318526111731,0.299891072961118,3.54523811  
135638,0.000392258565044907,0.00285169929203788,6.23009575394223  
"H2-  
M3",663.635656102028,-1.06556950764897,0.241481573288384,-4.4126327865  
8714,1.02121122214853e-05,0.000174204518017952,-9.2228030428296  
"Lonrf3",110.411391195483,0.411113712701849,0.24657248980668,1.6673137  
9086197,0.0954520258328928,0.190591254448514,0.681472028081963  
"Atp5e",10049.0727919437,0.876767805907367,0.313157738592106,2.7997641  
3755297,0.00511399580961869,0.0202194897788058,3.42036616409616  
"Nelfcd",1862.90380976365,0.276909999639568,0.116554709607996,2.375794  
17057354,0.0175112278934475,0.0519054304448827,0.819191674683564  
"Tubb1",7.4643136014221,-1.58715022383416,0.880394734110956,-1.8027711  
4610062,0.0714241634254256,0.15238301110285,-2.98599795753494  
"Ctsz",10251.0509310308,-0.212449408863067,0.160509409599768,-1.323594  
73125477,0.185637675933313,0.314116411121039,-0.246014636353712  
"Prelid3b",2029.87052973411,-0.390105330158039,0.250202206923262,-1.55  
916022866132,0.118958461431904,0.224971103879657,-0.581952621540458

"Sertad4",442.592316207483,-1.35510306316918,0.278298020497898,-4.8692  
515338226,1.12021739998064e-06,3.01607735157191e-05,-14.105224920017  
"H2-  
M2",275.376695824805,-1.56326092675,0.641884415420041,-2.4354243368364  
3,0.0148743350335846,0.0459400894162574,-4.81549574578795  
"Ube2a",1718.63405861186,0.5368783818817,0.179677376314018,2.988013254  
06383,0.00280797376886559,0.0128702098131973,2.33694567163323  
"Slc25a5",21963.3649855369,0.986176534273313,0.327174264501695,3.01422  
404288221,0.00257637471897644,0.0121069429068337,4.35295974830564  
"Atp1b4",0.186468003080665,-0.0694338828847404,4.78471990596172,-0.014  
5115877730327,0.988421834531527,NA,NA  
"Pdpf",3569.07955756787,0.210096384963729,0.248138957500245,0.8466884  
32482522,0.397168807982895,0.541651914251275,0.128816755459483  
"Kcnq2",2.60558910471425,-0.803503195071691,1.20680745159726,-0.665808  
944093126,0.505533227263356,0.640402958209011,-0.358087368627768  
"Eef1a2",4.76098170343518,0.249837902119928,1.72735908155899,0.1446357  
64958866,0.884998457779544,0.928224848294005,0.0186082472730582  
"Col20a1",345.2764986536,-0.65545079376416,0.248486699115227,-2.637770  
13457053,0.00834531286939365,0.0294031279955615,-2.31154830513691  
"Pls3",4397.54668592196,-0.635773596202278,0.124508052001269,-5.106284  
98304509,3.28554071793239e-07,1.15634427650263e-05,-7.22725930057113  
"Mpped2",447.029079740851,0.755184150100094,0.31472391762776,2.3995130  
582776,0.016416894259645,0.0494434050470433,2.27078330573324  
"Nkap",1645.57801231167,1.22920373376385,0.332166472425263,3.700565336  
37787,0.000215119681470544,0.00179248014927891,7.77367501249766  
"Ndufa1",5712.9220453002,0.650951828047649,0.441869409399715,1.4731769  
4821186,0.140703329123035,0.255226859358167,0.888941433854627  
"Wt1",1431.76267029623,-0.563312510564342,0.407694364712551,-1.3817029  
6016113,0.167062925118815,0.290371983773102,-0.696588011803964  
"E2f3",536.741206116856,-0.520171030630828,0.104532087199708,-4.976185  
25149168,6.4849587066013e-07,1.93635106985164e-05,-5.64495852546347  
"Cr1l",2939.55156812516,-0.119126456949576,0.19379408500673,-0.6147063  
61886326,0.538748657652089,0.669812533151446,-0.047740809994032  
"Ppfibp1",4114.99760122935,-0.626621302410933,0.209349904389598,-2.993  
17692185231,0.002760896493881,0.0127172123405839,-2.73507597192016  
"Cd46",404.359193652326,-0.169992729481413,0.208929729822041,-0.813635  
903450442,0.415853563346037,0.559155422255088,-0.0988215008457307  
"Cd34",2623.84754879209,-0.989444824063823,0.189090424049234,-5.232654  
31889982,1.67093049366995e-07,6.70236711058241e-06,-11.7873054573654  
"Plgrkt",2395.9137675695,-0.294818729656719,0.129137797127994,-2.28297  
784392676,0.0224316734885428,0.0629132292404499,-0.815468257047923  
"Cd274",579.50230129712,-1.31748616065064,0.401167432607734,-3.2841303  
9933601,0.00102297578466126,0.00597721961322303,-6.7452653380124  
"Pdcd1lg2",24.3805667588294,-1.59866124785658,0.706138878222634,-2.263  
9473581747,0.0235773526980723,0.0653184459941765,-4.36191652339272  
"Gtf3a",1974.81153989985,0.519139620579353,0.117017826274125,4.4364148  
3617395,9.14694985237894e-06,0.000159431318768499,4.53930354321957  
"Mtif3",1784.7107908931,0.488501738915754,0.202642520405208,2.41065763  
463135,0.0159237883993095,0.0483014975435185,1.4803032600967  
"Lnx2",869.491970355238,-0.586270555091344,0.230040917363637,-2.548549

02254019,0.0108172082451226,0.0360413408003078,-1.94822902382882  
"Il19",1.37161199061384,-0.156110194282093,1.56597513138542,-0.0996888  
080489392,0.920591386161556,0.951226658634901,-0.00780596363244032  
"Dyrk3",99.7037371843668,-0.273274720865042,0.453637202341652,-0.60240  
8090549919,0.54690252585862,0.676747188499801,-0.10670216566425  
"Mapkapk2",6399.5762185999,-0.330580161013411,0.131074125450426,-2.522  
08557468836,0.0116661324022265,0.0382103560521773,-1.07922809265639  
"Il10",6.78760060112954,-2.11179877964243,1.1686484946694,-1.807043597  
17661,0.0707554818215394,0.151353854586547,-3.98736071535039  
"Lamp2",26134.556024499,0.691737773213862,0.240198408692298,2.87985993  
321047,0.00397851879201018,0.0167206020153349,2.82997785747174  
"Atxn10",3141.59683502777,-0.573698725232219,0.286741863949771,-2.0007  
4979401234,0.0454193603732564,0.10793256411429,-1.27719601440794  
"Foxred2",614.026314154056,0.0460381780034174,0.225028439910985,0.2045  
88264583929,0.837893824972694,0.896388779904753,0.00503570443303602  
"Eif3d",4034.07317810174,-0.0706534016893863,0.13606090367491,-0.51927  
7762980308,0.603567057976681,0.724786357979485,-0.0227418000893771  
"H3f3b",19656.115165641,-0.31567530517949,0.176458207671314,-1.7889522  
3603027,0.0736225081829293,0.156133528883049,-0.586222831512338  
"Nup50",1973.70714022213,0.0257041053897295,0.112972846896987,0.227524  
631765432,0.820015818049738,0.884573633213488,0.00315259619946881  
"Phf21b",291.409968692149,0.424027476079095,0.261121729277513,1.623868  
97962233,0.104403774281567,0.20389270742608,0.674272111213052  
"Ift27",657.180572132442,0.182325403525137,0.154519957277942,1.1799472  
8148403,0.238021183099647,0.376210848579516,0.178242321882321  
"Pacsin2",5353.7330497585,0.475333998725729,0.169613670667168,2.802450  
9867396,0.00507159220389329,0.0201151148884279,1.85678948075687  
"Cmah",1609.9180327649,1.55902691784396,0.305948399762122,5.0957184906  
2168,3.47421067590567e-07,1.20319999571596e-05,17.6605646220834  
"Ttll12",969.353469330566,-0.122304836825647,0.133844660389231,-0.9137  
81965376688,0.360831424656258,0.505973439875808,-0.0833227508952019  
"Bik",880.883254346211,0.414718878393878,0.246436900389434,1.682860309  
22526,0.0924021367150974,0.185718674535715,0.698188460412307  
"Scube1",492.256463881249,-1.25124553134729,0.531499522553578,-2.35417  
997242162,0.0185636208194573,0.0542503687061573,-3.6463115222558  
"Tox4",2217.96925735692,-0.268294080137142,0.139572916585568,-1.922250  
29540498,0.054574270966404,0.124178916478346,-0.559670003977677  
"Mrps18c",1742.68725494179,0.138266638415503,0.306437391834166,0.45120  
6811244264,0.651840501040976,0.762880317484811,0.037422435044178  
"Sulf1",866.484948063224,-1.23712404388694,0.244812920827968,-5.053344  
56899961,4.34139639461475e-07,1.41316438901834e-05,-13.8150805219043  
"Srsf6",16009.9398465739,0.196354216273369,0.137959771064146,1.4232715  
4328251,0.154657452941261,0.274461729084255,0.253874897459174  
"Plcg1",4033.45473312603,-0.248254305998288,0.156587036863205,-1.58540  
777685936,0.112873715381329,0.216168520037831,-0.38025037328291  
"Kctd2",2954.89627391146,0.274778546057912,0.178661025977002,1.5379881  
7932056,0.124051505042329,0.232337812407423,0.401056565612605  
"Tmprss6",55.0213615355822,-1.64176766362233,0.398199373894528,-4.1229  
7901818699,3.74003777582747e-05,0.00046329896158249,-12.6040769288851  
"Kctd5",946.617674941801,-0.207111520897047,0.0937137546086711,-2.2100

4399793714,0.0271021089018309,0.0728677494991588,-0.542447675631496  
"Etaa1",498.476881547422,-0.179525079069573,0.146625494366221,-1.22437  
833778879,0.220809537236754,0.356597604435433,-0.185116799015126  
"Matn4",169.440803405343,1.10182696912036,0.259013057359055,4.25394372  
142777,2.10038111470899e-05,0.000298710656269845,8.94246641928705  
"Slpi",138.375752618433,-1.90742298040378,0.709760050966172,-2.6874194  
7057638,0.00720064627698905,0.0263460688888596,-6.93622198114318  
"Rbpjl",2.71815698905934,1.35481408255179,1.01542494419721,1.334233603  
66916,0.182127309847989,0.310249719326935,1.58564427056441  
"Sdc4",18381.0930987114,0.6426297990294,0.185991503432001,3.4551567527  
0805,0.000549972973084793,0.00372468670691466,3.59408229096432  
"Il13ra1",2676.482028758,-0.0343120274895947,0.292131260798957,-0.1174  
54145084487,0.90650017937688,0.942925053407193,-0.0020164655734949  
"Nbr1",7145.01865671205,0.391983469316813,0.128678522137144,3.04622296  
56247,0.00231735920379008,0.0111868952105717,1.76118653188104  
"Cyth1",2291.27527880365,-0.546187706106246,0.22349387105101,-2.443859  
88545334,0.0145310687278945,0.0452165301717981,-1.69115692380802  
"Rnd3",1119.45860172519,-0.410244297675894,0.177264961368896,-2.314299  
98634732,0.0206512725503119,0.0588689613763647,-1.16199289131869  
"Brca1",111.950141575916,-0.956255879266042,0.379665832279351,-2.51867  
773701176,0.0117796414611935,0.0385027729649695,-3.11454931971872  
"Gast",0.193414357714749,0,4.78471990595412,0,1,NA,NA  
"Cntnap1",613.30526074302,-1.08806080095256,0.334375757649451,-3.25400  
623717838,0.00113789781425684,0.00649001998870535,-5.48109504333199  
"Nt5c3b",780.953712885513,-0.377389564588344,0.162322239462439,-2.3249  
4059863973,0.0200751367080641,0.0576218188626283,-1.07701471215946  
"Coa3",2945.47220572223,0.324067256061465,0.23054574725171,1.405652717  
19217,0.15982727373942,0.281128749063708,0.411222724723692  
"Zbp2",10.44582953486,-1.94612617396927,0.827877985046686,-2.35074033  
74901,0.0187361035489071,0.0546635563364642,-5.65652867338497  
"Gsdma",6.22885053522355,-1.82049062137481,0.939359755452304,-1.938012  
15222195,0.052621739957791,0.120900721018984,-3.84630629261583  
"Med24",1848.19340498774,-0.125707069481593,0.142771659313196,-0.88047  
6350042494,0.378601311512854,0.52346960515371,-0.0813672082246196  
"Psm3",6482.06142002881,0.198934566749566,0.189723720711146,1.0485487  
3182907,0.294385862424966,0.438592979947089,0.163958577293084  
"Exosc10",2191.72061768262,0.0189484661220656,0.160456251080371,0.1180  
91168118932,0.905995421305908,0.94269979257559,0.0011180997314536  
"Glod4",1972.88322437049,0.16984096857268,0.227370980251111,0.74697733  
362941,0.455077243024618,0.595320480459941,0.088088934781491  
"Vps53",2139.3348213827,0.528564752951893,0.128068774461872,4.12719458  
878913,3.67215649154702e-05,0.000456922190632954,4.06519016328776  
"Taok1",3568.45713718317,-0.207839418718794,0.121084786221208,-1.71647  
838845001,0.086074520154627,0.175798598953227,-0.361311425658095  
"Dnttip1",1204.32196607575,0.0870892085516332,0.114233722046244,0.7623  
77404777005,0.445834787893318,0.586970151192932,0.0463995026367196  
"Tnnc2",5.71967511439029,-0.0720923896138314,1.08448445284143,-0.06647  
61854583938,0.946998717013584,0.967309892988783,-0.00239608907732288  
"Acot8",1251.12133689419,0.753948332340274,0.142578261369688,5.2879613  
2802726,1.23687118458443e-07,5.34734242949604e-06,9.15211160130251

"Cd300lg",2207.24761161481,-0.985359341183274,0.499838471941484,-1.97135554083286,0.0486832226034238,0.114103314619733,-2.13887121210973  
"Spint4",0.468824111290567,-1.00637860337629,4.78162849227705,-0.210467752775382,0.833302617535465,NA,NA  
"Pyy",0.190187088227992,0.864256293530331,4.78471990596623,0.180628398425718,0.856659263798371,NA,NA  
"Mpp2",353.707872798835,-0.8766794291908,0.406576591906981,-2.15624668670392,0.0310644077857556,0.0807699457269854,-2.20585724512111  
"Ppy",1.96653610703159,1.0109545872672,1.443380194526,0.700407689603356,0.483672735415246,0.621295934852525,0.481161576229511  
"Vtn",107.476624556296,-1.31342867341161,0.690689212435781,-1.90162036667646,0.0572208033619638,0.128966734938339,-2.69016562885012  
"Nlk",1380.68587899277,0.245683776715229,0.191092007336566,1.2856831645633,0.198553659111621,0.329733348552797,0.272579021958639  
"Traf4",3165.77009772405,0.655919059711576,0.14680275711205,4.4680295698461,7.89433954349169e-06,0.000141344198731865,5.81427153083557  
"Aldoc",285.927094543913,1.47188450705171,0.389377390666037,3.78009751550808,0.000156766947639649,0.00140729371320344,9.66452139055571  
"Stac2",43.7111334542924,-2.28968705126026,0.3838211853544,-5.9655046115969,2.43879159970309e-09,2.93528139574142e-07,-34.4398522739385  
"Rpl19",25157.3445225739,0.0687583575526075,0.165909015097415,0.414434125307992,0.678556201395072,0.783564632206166,0.0167702822861807  
"Nek8",1363.81746164098,0.812926806593819,0.214699316723195,3.78635022691712,0.000152876168703625,0.00138023382824381,5.35353139797376  
"Cacnb4",706.495675468992,1.89973108346519,0.476329853719704,3.98826793792162,6.65574665782356e-05,0.000722571430079824,13.7401741365516  
"Plxdc1",139.22186444259,-1.17714472355784,0.284048318564049,-4.14417071542147,3.41045617554438e-05,0.000430123379759148,-9.12456488406774  
"Arl5b",835.085923988675,0.194838086201181,0.170643543215363,1.14178411049097,0.253543768661713,0.39392979750482,0.181507764002009  
"Zfp207",6030.15259246603,-0.187381840950989,0.104052092198989,-1.80084645095497,0.0717270851353912,0.152828620475342,-0.351985191728997  
"Psmc11",4890.58231596613,0.0207555478521003,0.197744006995633,0.104961703605807,0.916406196906243,0.948764829144477,0.00109162392971459  
"Clqtnf1",767.036606253871,-1.48069717408299,0.246348487786607,-6.01057951435693,1.8486131150136e-09,2.45452644100394e-07,-22.5364505723279  
"Pipox",9811.48590736508,1.9674560693837,0.65219267016726,3.01667921057613,0.00255560103964986,0.0120273012481518,8.69728929643834  
"Timp2",9513.41186528609,-1.17363535472618,0.224823367716328,-5.22025520143892,1.78676743008337e-07,7.08097385198488e-06,-13.9170843553458  
"Zc3h18",2386.58868734852,0.0066309448875947,0.110916738735499,0.0597830856116983,0.952328397205566,0.970244861929682,0.000200299654954796  
"Top2b",3568.85597725338,-0.545202235028305,0.0999381293335478,-5.45539764116125,4.88633730970228e-08,2.66873402982003e-06,-6.99707442296348  
"Rarb",589.286823821224,-0.88980284754495,0.195612734413392,-4.54879816599523,5.39531583585077e-06,0.000105197868167418,-8.150298244027  
"Igfbp4",29979.058090898,1.00223142108847,0.182537739803855,5.49054361123027,4.00698531978752e-08,2.26182406888254e-06,13.028345959185  
"Cdc6",112.788415757016,-0.994534701222316,0.301214137953128,-3.30175305840749,0.000960826195900927,0.0056942824217861,-5.14004642773477

"Suz12",2763.06815677024,0.171099249906459,0.0870646845880289,1.965196  
91900411,0.049391450431669,0.115249872075022,0.369686057490452  
"Atad5",214.993692013123,-0.243934001709569,0.317136700623545,-0.76917  
6198244963,0.441788718210725,0.583445978574418,-0.131432472728287  
"CrLf3",1195.02838690174,-0.204384894128459,0.212160091823529,-0.96335  
221375405,0.335370798633196,0.479895775117426,-0.150056596110301  
"Tns4",311.672218798486,-2.66895749743579,0.587789646061735,-4.5406677  
6323494,5.60763379150405e-06,0.00010818090741651,-24.3721342950593  
"Tnfaip1",4834.96582821,-0.0738467419741465,0.137266980813923,-0.53797  
8919156473,0.590591602463709,0.713853072541044,-0.0248921208474028  
"Abr",3377.69365443391,0.123384685015249,0.246808992108244,0.499919731  
292186,0.617131598243809,0.735953021563168,0.0378283861686052  
"Rab11fip4",2352.37784544527,0.777749072725355,0.470900078487124,1.651  
62230429872,0.0986115702574947,0.195200852475191,1.27062906655486  
"Cd40",551.172039354509,-0.992134511471149,0.434156906984246,-2.285198  
03672535,0.0223012182757051,0.0626599269455372,-2.74824549530614  
"Slc35c2",1803.90287514267,0.229052632723268,0.153911121604735,1.48821  
365431607,0.136694557447191,0.249580530115678,0.317919018654071  
"Zfp334",323.086732655504,-0.699682194032106,0.201787948713911,-3.4674  
1318543306,0.000525493455408759,0.00360128334134162,-3.93673738517811  
"Elmo2",2269.77129393064,-0.369416337476153,0.156713463234587,-2.35727  
250136236,0.0184097317720677,0.053913029452054,-1.07883722752734  
"Wsb1",9685.88308356707,-0.00383823827442036,0.292537403948729,-0.0131  
205043273477,0.989531652518332,0.992994758661988,-2.69824052869901e-05  
"Ttpal",1489.51688309268,-0.435962153837754,0.125203463892511,-3.48202  
949250696,0.000497628881420887,0.00344969205366041,-2.47167448822159  
"Rhot1",2383.32954383357,0.245712923134596,0.159182973145083,1.5435879  
7476817,0.122688180049965,0.230329095236163,0.360767051897502  
"Hnf4g",147.632893383962,1.59538695125309,0.422736743391127,3.77394909  
762315,0.000160683560001478,0.00143518463257389,10.4441396914877  
"Rhbd13",583.472052558805,-0.747176458268019,0.263479169523741,-2.8358  
0846113413,0.00457098505355038,0.0185389040804907,-2.97965291733612  
"Ada",122.050052027099,-0.800309833235038,0.305701064564612,-2.6179491  
2089973,0.00884599936898361,0.0307614224534408,-2.78627379595845  
"Serinc3",22528.2207092494,-0.328318979215601,0.166040984973188,-1.977  
33697658211,0.0480035526600886,0.112849441736967,-0.716293754223708  
"Tha1",1075.97935689258,0.214527274522237,0.155518080840165,1.37943622  
608563,0.167760296419713,0.29140225029769,0.264522998056349  
"Pgs1",2040.17460652124,-0.297335295942572,0.111931626782516,-2.656401  
09493179,0.00789796147183912,0.0282247897320233,-1.06075990833682  
"Birc5",270.197071868823,-0.559505437411161,0.408856617032066,-1.36846  
369632628,0.171166978114448,0.29600121856102,-0.681137280032861  
"Afmid",1574.5568829088,1.10408185629234,0.319522594592747,3.455410900  
43903,0.000549454760003951,0.00372247008705943,6.17553593573499  
"Pigt",3445.83001743898,-0.0380645862932534,0.179647479969123,-0.21188  
4888670833,0.832196840034931,0.892673419561928,-0.00432164288070433  
"Wfdc2",9061.87257307063,0.114786839794842,0.221617961914077,0.5179491  
71644062,0.604493733192422,0.725586502318834,0.0368207465207566  
"Etv4",168.505155537555,-0.33004771061535,0.434728861489278,-0.7592035  
86080495,0.447730781213329,0.588564335853014,-0.174948071965457



"Eppin",4.01019795424579,-1.78570487203253,1.22851000409438,-1.4535533  
8261889,0.146070169374919,0.262689186724975,-2.38710124666631  
"Dbndd2",2167.34067713743,0.225455376143656,0.193197739046175,1.166966  
94928594,0.243223717009172,0.382018369119126,0.216952683941385  
"Mmp9",132.445465066624,-2.26061261182785,0.389275784541895,-5.8072263  
9731666,6.35162253858337e-09,5.65497425832413e-07,-32.5201785753951  
"Slc12a5",293.058913809162,0.382273310323183,0.312183862372802,1.22451  
336022834,0.2207586294541,0.356586178203633,0.394192337640309  
"Ghdc",1972.06288308643,0.924956258711575,0.166989858009756,5.53899661  
773195,3.04209518665583e-08,1.87112845266294e-06,12.1992192916022  
"Pltp",3742.60192471612,-1.52372933581716,0.262959315480598,-5.7945440  
4584342,6.85070432811396e-09,5.96319630519015e-07,-21.838833976297  
"Slc12a7",5944.97216855624,-0.0198698203523294,0.299702713682987,-0.06  
62984332312281,0.947140230582657,0.967332262107834,-0.0006599411440558  
08  
"Ctsa",11927.8790833625,0.509419904567678,0.182697337433538,2.78832692  
213151,0.00529810488128232,0.0208016907922234,1.97284116605325  
"Zswim1",306.205320662211,-0.304032041919372,0.294471204816915,-1.0324  
6781670351,0.301853016727317,0.446651750789195,-0.245042550001815  
"Slc12a4",1982.60045868481,-0.644984663967072,0.208803741252041,-3.088  
95166389058,0.00200864116079005,0.0100293176320319,-2.96837596910799  
"Spata25",3.21979517139964,-0.143744988987211,0.994886510515732,-0.144  
483805406806,0.885118443682586,0.928287868314782,-0.0106965521234855  
"Myo1c",6741.01025365366,-0.312224163410333,0.13420096983669,-2.326541  
78125747,0.0199896662455721,0.0574187555179972,-0.892144415691539  
"Crk",6428.52269618106,-0.0251015342430726,0.132541350167391,-0.189386  
438355811,0.849789952757798,0.904333833581025,-0.00252412749420803  
"Cox7c",16195.3492333519,0.820994733731465,0.325844261147934,2.5195924  
2995147,0.0117490788784908,0.0384368355659084,2.67540757374199  
"Pitpna",6395.09914813704,-0.166697631717353,0.122542153424714,-1.3603  
2889139464,0.173725869625175,0.299549611421264,-0.200949865545077  
"Mlx",1891.08508176657,0.452656277503589,0.169526698472151,2.670117931  
76606,0.00758246101859825,0.0273641978418399,1.62889256275355  
"Retreg3",4112.34729876999,-0.20619149155116,0.164926430656107,-1.2502  
0283729474,0.211225460634096,0.34524889189736,-0.219282526721928  
"Jph2",482.872294665675,-1.45150688955143,0.288361862367949,-5.0336298  
9000018,4.81278450533855e-07,1.52584832983888e-05,-16.0977556152892  
"Dhx58",472.93073403028,-0.86521794444595,0.289330779704802,-2.9904109  
9370317,0.00278602309710716,0.0127936595259998,-3.77131680443876  
"Rab5a",3621.48286603613,-0.102070804722814,0.199538026461214,-0.51153  
5603178144,0.608976064731353,0.728902106208221,-0.0322764053597533  
"Hspb9",1.87579826627656,-3.16842740075553,1.75701816950313,-1.8032980  
2830186,0.0713414221307389,0.152306476371964,-5.96253836057013  
"Nkiras2",1073.72311401682,-0.24326047474175,0.162559356552857,-1.4964  
4093025586,0.134538790175508,0.246544861921246,-0.340616067142113  
"Ppp2r5c",4018.75177087171,0.0485323600234422,0.119248557663755,0.4069  
84880775572,0.684019092737548,0.787540848550145,0.0115914707342052  
"Ift52",1773.96490421658,0.15587117340029,0.151257545512482,1.03050180  
321369,0.302774506209556,0.447370212342674,0.125377910513508  
"Mybl2",270.411084389358,0.200548549153485,0.25134491162282,0.79790176

7171785,0.424927497809325,0.567909819198452,0.113468893451339  
"Sgk2",3610.77517045228,2.22992774769744,0.747892886022646,2.981613797  
07244,0.00286733460429247,0.0130593996997184,9.67397763146365  
"Eya2",389.63987484832,-1.25954695509305,0.302795856697887,-4.15972321  
691891,3.18633486895534e-05,0.000407926180399811,-9.83003890151198  
"B4galT5",4625.93418193494,0.857029505302934,0.380930101459786,2.24983  
40299668,0.0244594829396032,0.0672269205800662,2.31370670710815  
"Gdap1l1",22.3478584597968,0.0995081283323117,0.807109190913635,0.1232  
89549236418,0.901877816197397,0.939912002791001,0.00616642140895724  
"Hnf4a",15663.8626288651,2.01359600704391,0.687214423125274,2.93008403  
095877,0.00338870352568427,0.0148378489431376,8.47839499713062  
"Ptgis",522.11740498879,-1.12819943572263,0.29787483684769,-3.78749493  
465775,0.000152173786311867,0.00137683734826394,-7.432539734251  
"Cadps2",777.997255431946,-0.020230544603898,0.157220836756501,-0.1286  
75975915524,0.897614045791272,0.937121367789581,-0.00131382167914462  
"Ddx27",1914.77693545828,-0.161579413927286,0.212679048914352,-0.75973  
357390909,0.447413855811169,0.588364157321519,-0.0857032089068331  
"Cyth3",1814.47434946707,-0.778969761638945,0.123109766722694,-6.32744  
080649249,2.49260540524432e-10,5.11587580962671e-08,-13.0776030818494  
"Cyth4",3838.35072260945,-1.16138615144079,0.413748282616226,-2.806987  
2437828,0.00500072219147392,0.0198866166203056,-4.54997217098052  
"Rac3",236.384093984739,-0.44522280335819,0.204625667770473,-2.1757915  
7204067,0.029570849173857,0.0778205449037474,-1.13680956007115  
"Rrp7a",3294.9718256543,-0.142366255241032,0.121570055954994,-1.171063  
50015777,0.24157325381086,0.380086965814643,-0.137718736605605  
"Cyb5r3",12713.4548721278,-0.153660703434335,0.195289722976827,-0.7868  
34560938815,0.431378718946213,0.5735439660425,-0.085423163154144  
"Ints2",1768.97700803257,0.622269246465255,0.151374729581035,4.1107868  
4128806,3.94313095230676e-05,0.000482328527654186,4.7521987262195  
"Med13l",2108.68047104795,-0.0772835788820287,0.212820947332183,-0.363  
138966585842,0.716501077429228,0.812087310801319,-0.0160863774741048  
"H2bc4",7290.05020796514,0.841310115559009,0.344833339966583,2.4397586  
2554514,0.0146970782925838,0.0455368874223422,2.59900260952673  
"Baiap2l2",3762.77874352333,1.61637093510263,0.430651053882843,3.75331  
935340475,0.000174508303556331,0.00152239950905652,10.4861540136179  
"Mafk",1918.18319124857,-0.313780738145798,0.106425707300932,-2.948354  
73593371,0.00319470242393925,0.0141661575987661,-1.33573304428164  
"Med1",2219.49825089611,0.162041791804178,0.0861686394422673,1.8805193  
2643947,0.0600373349544604,0.133631045313022,0.326137085725969  
"Erbb3",2702.54367100745,0.455728450533676,0.22167134351431,2.05587444  
596445,0.0397946198384908,0.0975258292623044,1.06077086850918  
"Stard3",1435.35597291737,-0.203123376160641,0.0963768475443946,-2.107  
59514692649,0.0350660237326465,0.0885185565431306,-0.492481374125679  
"Ikzf3",244.382461330527,-2.11755943926122,0.371564829619888,-5.699030  
88359437,1.20490398836964e-08,9.25538046058966e-07,-29.4190216225637  
"Mfng",1080.36969165421,-1.73869935437624,0.397547366827487,-4.3735652  
6406257,1.22233679663963e-05,0.000198443987184676,-14.8224183911454  
"Vmp1",8340.0952722222,-0.00864451916649425,0.179783976905226,-0.04808  
28120241841,0.961650244378101,0.976728471369704,-0.000203548917227657  
"Uchl5",1223.43655343789,0.236911590942189,0.155372094779676,1.5248014

212471,0.127308635324703,0.236428590490624,0.341652351622288  
"Glrx2",1763.78808881565,0.253887649048569,0.228090289272101,1.1131015  
2597375,0.265664828391938,0.407579890155481,0.22786881524126  
"Ro60",2145.49882714312,0.255050939949544,0.090031616619142,2.83290414  
553454,0.00461272156582606,0.0186404832747525,1.01571984779304  
"Stk4",1604.33033162003,-0.249800060323674,0.144369931635108,-1.730277  
61040323,0.0835806878050998,0.171940942268816,-0.439799040370128  
"Wfdc15b",2896.5046014376,2.50818540139349,0.514712904551952,4.8729794  
4001778,1.09927667018299e-06,2.98935795191464e-05,26.1299415027547  
"Pmp22",2554.43960001949,-1.17338716606786,0.233386216234736,-5.027662  
66576636,4.9649427773077e-07,1.56644748012857e-05,-12.9824907338272  
"Gdf9",36.9833272850141,-0.723315310708917,0.401250963338444,-1.802650  
65207786,0.0714430967865312,0.152393878719638,-1.36076354802349  
"Zcchc10",481.889396440923,0.0206542977355572,0.147384316697519,0.1401  
39047344818,0.888550129666596,0.930848400399704,0.00148006322732385  
"Tbx5",29.2575643830873,-3.53421655508166,1.36181284639021,-2.59522926  
696563,0.00945278410698917,0.0323941902536924,-12.1215717747363  
"Psm6",6600.5212024636,0.475793328847188,0.154123825165948,3.08708487  
045979,0.00202129877531363,0.0100821907191264,2.18721465626311  
"Spag7",2558.98364136585,0.324771395332662,0.11828441981752,2.74568194  
047614,0.00603852744033359,0.0229645422335916,1.22562355656872  
"Pfn1",16902.6135706025,-0.213857082173836,0.164995291080318,-1.296140  
51876021,0.194927077592319,0.325512860474052,-0.240023203661747  
"Tomm34",2084.9795544956,-0.405263183310864,0.0971625011758852,-4.1709  
834391485,3.03287905422748e-05,0.000394496836553218,-3.17641207614167  
"Ywhab",15291.4828915583,-0.214273778751888,0.178617409868913,-1.19962  
426344187,0.23028529894255,0.367078381195377,-0.214740870089173  
"Ksr1",861.776847732688,-1.04554197183977,0.15144395851062,-6.90382093  
892804,5.06221023791846e-12,2.44907581740543e-09,-20.7305410569982  
"Gpx3",493127.008994356,1.9239481687402,0.58667411133334,3.27941549076  
986,0.00104022360310221,0.00606164967522023,9.82324317574886  
"Anxa6",6262.14309998305,-0.99131988220631,0.2018267497729,-4.91173684  
024425,9.02731594427803e-07,2.55463869784518e-05,-10.4832222882303  
"Il12rb2",16.841683849714,-1.55904722735552,0.587120274547601,-2.65541  
371153777,0.00792111958625405,0.0282712776300167,-5.55942040607901  
"Zkscan6",497.202128311436,-0.209489892901069,0.127024270424718,-1.649  
21154201964,0.0991043041859737,0.195977253855793,-0.341417551979783  
"Kpna2",1166.5103468253,-0.0613994981691306,0.180999801554568,-0.33922  
4118710538,0.734440901221966,0.826236908055152,-0.0117195514173041  
"Smurf2",2136.70568705656,0.230728962370379,0.23835282476992,0.9680143  
82011625,0.333037187053762,0.47774860750252,0.170432703509173  
"Cep95",914.841823839382,0.127206921211095,0.180695165684469,0.7039863  
0051467,0.481441305096415,0.618959683948958,0.0610230859359975  
"Vezf1",3021.98689579961,-0.0766013237941204,0.0967397194971297,-0.791  
829087290182,0.428460339510857,0.571182804579699,-0.0429002628742423  
"Cuedc1",4313.94340599372,-0.192972601602806,0.172512713335156,-1.1185  
9930710092,0.263311119209273,0.405276302679382,-0.174290193765758  
"Srsf1",11258.1776000566,0.130817850772109,0.110669397143585,1.1820598  
4805703,0.237181954712169,0.375371246183269,0.128180530576291  
"Abi3",752.65704784446,-0.282142468571284,0.229333990165508,-1.2302688

6842053,0.218596438116869,0.354120417946388,-0.292897248545482  
"Shroom1",306.309831725786,-0.247100849628913,0.437195966634966,-0.565  
194714696964,0.571941331223371,0.698160150015231,-0.0887850059834801  
"Kif3a",1791.18973724579,0.353169915358869,0.236692588982717,1.4921038  
1650208,0.135671931539501,0.248061826815191,0.492346148699664  
"Sept8",2976.92081093228,-1.14146595017517,0.162104893762188,-7.041526  
77740701,1.90144663534723e-12,1.15857520300001e-09,-23.4868888410021  
"Mtmr4",2590.09481501875,0.0936654495037458,0.161571621959514,0.579714  
731880431,0.562107007087076,0.690130497083547,0.0347381335956337  
"Mrm1",614.865769316988,-0.0548782695790939,0.136325932325184,-0.40255  
1947696865,0.687277865553291,0.79005030153336,-0.0129325396214551  
"Mapt",9439.03380004084,1.23029566191196,0.358019332742297,3.436394488  
779,0.000589511920838102,0.00390970855929752,6.82111894348795  
"Kansl1",2503.52947035274,-0.129367557924057,0.186148241726344,-0.6949  
70614410853,0.487073717392021,0.623856226874441,-0.0610401860416033  
"Gid4",1783.05855627381,-0.522637395941896,0.292493086755569,-1.786836  
74796955,0.0739638780440191,0.156689376227368,-0.968703149796889  
"Myo1b",1563.38591348942,-1.00544023384399,0.15757658716607,-6.3806448  
1485664,1.76343879334737e-10,3.82039217696521e-08,-17.1732486390923  
"Dhx40",2295.53526780498,0.0742537952253178,0.181415025973141,0.409303  
44566007,0.682316987190616,0.786277577792117,0.0178539832337861  
"Ypel2",2156.15263234128,-0.603607796362387,0.163470077049634,-3.69246  
658016265,0.000222089532960616,0.00183876930516607,-3.80191955047966  
"Akap1",4159.98970409194,-0.158245074275381,0.328126461982916,-0.48226  
8553773698,0.629615183028944,0.745550640027836,-0.0464658523815089  
"Nol11",801.895346922009,-0.248968646379873,0.179118189564294,-1.38996  
852852013,0.164538434244327,0.287161689124229,-0.310640631214402  
"Derl2",3389.68170551285,0.345895612859474,0.181196393218087,1.9089541  
8344865,0.0562680023251235,0.127275349110819,0.713030059030792  
"C1qbp",3482.77181408163,0.801333572127417,0.190441953747264,4.2077575  
6790896,2.57917349668925e-05,0.000348742890696582,6.37955729000386  
"Rpain",1003.34052229679,0.583950372087667,0.180300042508265,3.2387700  
1893052,0.00120046329028199,0.0067571112107154,2.91809333390797  
"6330403K07Rik",44.9278336522263,-0.956891964837859,0.355728747315793,  
-2.68994837234336,0.00714630739139646,0.0261767239371497,-3.4858470623  
0182  
"Slc13a3",15190.263561864,2.5835181245221,0.799680294944471,3.23068874  
005642,0.00123492341101513,0.00690919273112568,12.8527507098333  
"Kcnab3",80.3609028375851,-0.234030470232659,0.22392149701143,-1.04514  
516630225,0.295955881851311,0.440298167582547,-0.191975926773698  
"Chd3",18283.9877433136,0.690008261070115,0.18498390445299,3.730098913  
79748,0.000191404613617829,0.00163845738808658,4.42571305331321  
"Kdm6b",2766.86461817458,0.00967281210265028,0.17885975427108,0.054080  
4282219362,0.956871085441143,0.973609630735731,0.000258697865007095  
"1700125H20Rik",0.459714718176847,-2.07048984337634,2.65714980750915,-  
0.77921456950794,0.435853329056085,NA,NA  
"Appbp2",2332.07075916765,-0.1771898343983,0.132467371083978,-1.337611  
16377836,0.18102322334348,0.308813632286264,-0.208201123601946  
"Wnt9b",272.560064946954,0.111625932628334,0.800891940274519,0.1393770  
2081266,0.889152229846806,0.931329045262048,0.00794136265469751

"Adora2b",201.706289918754,-0.977065599396749,0.295490871784933,-3.30658471273484,0.000944407897306163,0.00562182116910664,-5.06227420196579  
"Ncor1",11251.5531026616,0.741222331710902,0.275321893817726,2.69220264844474,0.00709818004976285,0.0260395700113407,2.70408133578743  
"Trpv2",631.354571595857,-1.04724471089513,0.257174648751789,-4.07211486815667,4.65881925177788e-05,0.000548205538751751,-7.86361420326031  
"Cenpv",660.274272249503,0.442941321941049,0.304918327786558,1.4526556181664,0.146319395364042,0.262991848341453,0.591606710980131  
"Pcgf2",1863.71815120634,0.216192731431553,0.188012986530479,1.14988190667619,0.250192513974062,0.389886000436881,0.203632125965403  
"Cwc25",1272.38299439619,0.15955121826183,0.165899767798324,0.96173261951631,0.336183932386099,0.48063604001057,0.116894397337091  
"1700001P01Rik",3.60733357686182,-0.437454577694477,0.745337507323434,-0.586921459602122,0.557256456533197,0.686379430794964,-0.164624961860568  
"Pip4k2b",1324.90662898855,-0.585952554080177,0.147645646534234,-3.96864091718625,7.22837077431346e-05,0.000770157231462097,-4.20064456240564  
"Trim37",932.895110764417,-0.0825329775823149,0.156030844865465,-0.52895296217538,0.596838080553246,0.719305337063229,-0.0271920858449813  
"Ybx2",1182.48276029672,0.900958767192714,0.212805838407731,4.23371263652315,2.29864633915118e-05,0.00032013575943407,7.24980383819291  
"Ctdnep1",4178.80490722546,0.0589383415103819,0.14998675880394,0.392956964870646,0.694351266858741,0.796145898336474,0.0134363399535903  
"Elp5",1462.0011792557,0.267306734358039,0.207619098304498,1.28748625025816,0.197924859022674,0.328941263316066,0.297211962648359  
"Slc2a4",2762.46285920481,-2.06363817911495,0.6813685825906,-3.02866646898935,0.00245635704804164,0.0116672471918918,-9.18519110625196  
"Gabarap",13414.4673040993,0.453069098532201,0.232620081082169,1.94767836217959,0.0514534607575757,0.118881334026687,0.964869307103454  
"Clndn7",2688.45703737458,-0.158129238395762,0.235866617990749,-0.670418051281695,0.502591330578514,0.637450449724834,-0.071202232781794  
"2810408A11Rik",188.081271642065,0.165386527259779,0.277577421242744,0.595821254190364,0.551294643369661,0.681274113095554,0.0634737843182248  
"Phf23",2070.37294904823,-0.00124997553518172,0.111126617542209,-0.0112482100402897,0.991025416119977,0.994184492339468,-7.2904617754761e-06  
"Acadvl",13118.5695409549,0.259696268821661,0.4629703230516,0.560935023026771,0.57484183340335,0.700516629231158,0.0924355561262992  
"Dnah11",88.4774022702793,2.32589183859289,0.799315950321517,2.90985290316967,0.00361598898256633,0.0155827258775188,9.6794135516938  
"G3bp1",6330.74613167027,-0.115891276818781,0.0595687258762081,-1.94550538246561,0.0517141825428914,0.119328181209621,-0.246370687550147  
"Atox1",4024.42692313333,0.408236678527153,0.193954552092469,2.10480586365678,0.0353082105561395,0.0890221628932947,0.987471421512689  
"Glra2",0.0821000670474453,-0.544048378937457,4.78471990596623,-0.113705376621746,0.90947135024012,NA,NA  
"Sparc",36143.4366621254,-1.45268307196323,0.271689487251818,-5.34685050443925,8.94978769931686e-08,4.20489061593446e-06,-17.9831447542588  
"Glra4",0.585331304985444,-1.55588854782207,4.55838683620985,-0.341324

377181588,0.732859398283889,NA,NA  
"Mief2",991.760809687054,0.185728522522922,0.24362208537172,0.76236324  
0752727,0.445843239103443,0.586970151192932,0.0989526855719111  
"Tbx3",1153.63980310196,-1.75406873919186,0.469851176445462,-3.7332432  
632431,0.000189029864707876,0.00162222900619462,-11.2680571489954  
"Mmp20",4.30637767032433,-0.483336134521447,0.948308129945988,-0.50968  
2580227353,0.610273858929021,0.72996256066487,-0.152135864283424  
"Mmp7",665.721682706686,-1.15929239213396,0.706507992929071,-1.6408765  
4171854,0.100823045431007,0.198570478769069,-1.87412504792683  
"Crhr1",0.133590265425185,-1.03635685866904,4.78109845466094,-0.216761  
246081166,0.828394415030285,NA,NA  
"Dusp14",435.490316236545,0.791608004131145,0.230230352081233,3.438330  
33731295,0.000585313194674015,0.00388971938301089,4.39296391446863  
"Tada2a",837.534171658956,0.431148792667786,0.190946327138699,2.257958  
03003119,0.0239482761723684,0.0661018528891336,1.1712409178795  
"Ikzf1",730.518248658503,-1.37310059579729,0.365814455245075,-3.753543  
84199331,0.000174352021184021,0.00152239843665295,-8.90794654521408  
"Pnpo",2487.66639618265,1.00594852571128,0.231511818212323,4.345128181  
70132,1.39194358208422e-05,0.000220293149054205,8.47064126941881  
"Cog1",1532.13144821459,0.264316770517528,0.101230908296037,2.61102834  
071752,0.00902704125464578,0.0312494511533941,0.916056763555038  
"Cbx1",5277.51816315543,0.097176900037837,0.140063011697392,0.69380844  
2787088,0.487802347227565,0.624543316451708,0.0457445281977288  
"Cdk5rap3",2632.57315210604,0.357865392278506,0.142885460959548,2.5045  
6127499089,0.0122603366491643,0.0395912626673411,1.15559989517473  
"Copz2",1313.00005423533,-0.296744059254719,0.217923085593033,-1.36169  
171084923,0.173295198324984,0.298912754506417,-0.358349176168582  
"Slc25a39",17837.9255120044,1.29053450658018,0.307067417046392,4.20277  
253442753,2.63665507000237e-05,0.000353572906154789,10.2564208491138  
"Sp2",548.085828579255,-0.72803762107846,0.189115042719955,-3.84970762  
033221,0.00011825890524419,0.00113552583127476,-4.93657517376793  
"Aatf",1072.8230713089,0.671019141532097,0.187994714190042,3.569351108  
74325,0.000357866537483929,0.00265061521628455,3.98113208044293  
"Lhx1",729.927750384686,2.11389107497359,0.704570599385134,3.000254448  
33825,0.00269754157094419,0.01249975528679,9.26316837750442  
"Dync1h1",14290.8572831504,-0.139728252606754,0.232120407301735,-0.601  
964533110268,0.547197746133688,0.676940654407375,-0.0545180056065616  
"Cpsf4l",204.568082866144,0.723296770372107,0.424743590694191,1.702902  
14194867,0.0885863831300036,0.1798839551727,1.24077461997008  
"Pex12",544.622347316172,-0.0949375270435178,0.242857488639126,-0.3909  
18672409523,0.695857351457822,0.797356995693736,-0.0214988665595031  
"Ndel1",3476.29060656927,0.497813419079962,0.119215294102217,4.1757512  
9792602,2.97004172091456e-05,0.000387605096854007,3.9105850262642  
"Slc25a35",1080.88223912111,-1.40590596922959,0.555768221066683,-2.529  
66239511004,0.0114172325181109,0.0375972301364849,-4.6125313079303  
"Zbtb4",4040.32533347407,-0.373607129219278,0.170427522569874,-2.19217  
602641675,0.0283667988096214,0.0754050229297883,-0.96573011514693  
"Tnfsfm13",425.309571203488,-0.718472479864112,0.256279965318661,-2.80  
346721200292,0.00505563724943324,0.0200640779746488,-2.80838263661859  
"Mpdu1",3494.82047053511,0.0791815500685024,0.281725630647496,0.281059

092445788,0.778665076455052,0.856940320636711,0.0122246019972886  
"Fxr2",4674.34482777072,-0.0389160447854969,0.169482452914635,-0.22961  
6955125721,0.818389430586758,0.883454607329233,-0.00482229596312275  
"Atp5g3",29229.0610789473,1.09061477354732,0.406475707033882,2.6830995  
1781796,0.00729432807822625,0.0265940181131742,3.95573500493609  
"Cd68",1303.52417454768,-1.29503197994302,0.402596309319481,-3.2167010  
7242673,0.00129673631381824,0.00717880881511301,-6.39308312055489  
"Slc35g3",0.794692955964361,-0.605008654123072,2.07950396886799,-0.290  
938927350265,0.771098028707842,NA,NA  
"Acs11",14299.0471604249,-1.57094812752677,0.732103556255853,-2.145800  
4323336,0.0318889041406741,0.0823645321148315,-3.92202967679591  
"Abca5",545.540976078897,-0.0228455230397185,0.126769051366932,-0.1802  
13725616613,0.85698478336035,0.90916204940204,-0.00217562321720711  
"Smyd4",687.045101450216,0.649319196596279,0.279613793791256,2.3222001  
5969965,0.0202221604015631,0.0579755452888806,1.84908834670035  
"Lsp1",3937.90229323666,-1.09418273422506,0.336058794753229,-3.2559264  
9651835,0.00113023006882658,0.00646063496979791,-5.51689962580637  
"Zfyve27",2359.32085101671,-0.240844433775549,0.129100798721083,-1.865  
55339828596,0.0621038747429764,0.137010788610382,-0.478725423051971  
"Avpi1",587.512963849556,0.248687551726607,0.274367959229134,0.9064015  
79926902,0.364723336862131,0.509702954568364,0.167597296698897  
"Sfrp5",95.0254754138792,-1.10253391979397,0.444571588925854,-2.479991  
85566006,0.0131385383655335,0.0417631596105594,-3.50136181696949  
"Myh11",4494.44876787104,-1.67584735196638,0.445844793089855,-3.758813  
3313214,0.000170721145836723,0.00150009955003354,-10.8967345478266  
"Rad51d",795.199321611424,-0.294542311180678,0.274422974675112,-1.0733  
1505873145,0.283129780958667,0.4270821962813,-0.250590350265591  
"Fndc8",7.46378778482221,-0.221890616922396,0.706213604523935,-0.31419  
759616777,0.753370968291449,0.839720296103966,-0.0387612782614773  
"Unc45b",864.901092844156,-0.946429292189597,0.31912139298982,-2.96573  
43975676,0.00301961143901421,0.013600458267013,-4.06742354235328  
"Pank3",3902.17678678182,-0.650551753240494,0.44405771268079,-1.465016  
22348387,0.142916491542695,0.258376054900276,-0.880417175082418  
"Rars",2260.37689269532,0.0581262471157481,0.0644559295300685,0.901798  
291321396,0.367164027631983,0.512052702795014,0.0389055086920845  
"Wwc1",10238.5415180909,0.88672557228098,0.349425818091993,2.537664724  
1548,0.0111594837097296,0.0369382476711158,2.92487116564286  
"Mrpl58",2487.20150085995,0.686402350297628,0.180859410326458,3.795226  
07675567,0.000147508978700809,0.0013471335207065,4.53696596115267  
"Fdxr",1061.83019949846,0.617129766000391,0.184174865207491,3.35078168  
948371,0.000805838038286993,0.00498759665537849,3.27128215321384  
"Otop3",4.36179233810672,2.0823421446507,1.05364289249422,1.9763262861  
493,0.048117834319162,0.113090830949255,4.53859791053708  
"Sult4a1",194.379053823632,0.234224804046782,0.55650854283311,0.420882  
674782268,0.673840756989632,0.779596931097362,0.0583168813182696  
"Pnp1a5",2.47246032684702,-5.21141774515041,2.3573917183827,-2.2106711  
0082398,0.0270586211607567,0.072780934665807,-13.6554844034169  
"Mrpl45",2386.70312366984,0.623118635634983,0.170931825422275,3.645421  
99263135,0.000266953384717392,0.00211587686797549,3.83734274376044  
"Mb",7.23503905695162,-0.448995284757058,0.878289441920499,-0.51121562

3604981,0.609200079794349,0.729080724025916,-0.141869408551377  
"Irf1",3600.87113439692,-1.00291135545898,0.263464826228894,-3.8066233  
3494062,0.000140877053017187,0.00129750627289991,-6.66666379381378  
"Slc22a5",6949.48379696329,1.80086966659344,0.279440575600503,6.444553  
23899709,1.15941431385201e-10,2.72364581825138e-08,31.3688253658713  
"P4ha2",1390.3276330617,0.038054139511042,0.187017787891298,0.20347871  
6864946,0.838760879196259,0.896904662858871,0.00414050755416382  
"Alox12e",3.18085787507413,-1.43560049917859,1.0302327271685,-1.393472  
03920051,0.163477094553314,0.285872321937266,-1.7976732933718  
"Arrb1",4639.68483934173,-0.598067696413734,0.150499752808906,-3.97387  
826392725,7.07117143939335e-05,0.0007563011559259,-4.2983549411367  
"Csrf2",6.78432894794211,-1.45371431747312,0.704673830059371,-2.0629605  
5772447,0.0391163757318821,0.0963170272018828,-3.40185164647784  
"Tm4sf5",19.1491773698643,-1.10422950393531,0.676568409292251,-1.63210  
325632914,0.10265773590343,0.201263999396767,-1.77023206081727  
"Cycl16",6672.14862681796,-0.807701056740009,0.425990601648195,-1.8960  
5370075054,0.0579529439443276,0.130210474882058,-1.6465818783055  
"Pelp1",1573.11392793326,0.123080171027642,0.208106180325741,0.5914296  
77076329,0.554232560714699,0.683821202861178,0.0467777014714491  
"Med11",852.345658134938,0.0641749126902654,0.177463532438217,0.361623  
099735196,0.717633700236469,0.81285127728655,0.0132974986381085  
"Alox15",5.03117948219854,-2.95579383214261,1.10715828196373,-2.669712  
07305608,0.00759163150863005,0.0273759258655944,-10.6352159828887  
"Heatr9",10.8459535246922,-1.75742772130269,0.636214485559316,-2.76231  
956548063,0.00573922741729732,0.0220327839494021,-6.70497999057408  
"Ccl6",1398.20083358331,-1.43660700968926,0.428431774230883,-3.3531756  
8886726,0.000798899777375863,0.00495793668379305,-7.62373668267239  
"Ccl4",65.779608650085,-0.88460319438156,0.611689288825296,-1.44616427  
088396,0.148131132428479,0.265376687547981,-1.17351902056939  
"Natd1",1086.23163787095,-0.617802522916322,0.264654088026737,-2.33437  
740381289,0.0195759689085438,0.0565135092950529,-1.77511689422937  
"Map2k3",2342.90811043588,0.234365250542756,0.170609608397219,1.373693  
15095723,0.169536964082064,0.293964582096227,0.286932435956944  
"Ywhah",6439.01293697616,-0.452210772317384,0.18581000466212,-2.433726  
71530627,0.0149442733523721,0.0460612459412824,-1.39180677874629  
"Hoxb1",1.78500117194758,1.11497307089916,1.28839936583851,0.865393992  
315044,0.386822577279716,0.53122035581067,0.705307837890585  
"Sart3",2175.67239288642,-0.0737129925880115,0.16499282318232,-0.44676  
4842047448,0.655044858679898,0.765114997576268,-0.0197351155834471  
"E2f2",328.491773690099,-0.95407497050343,0.267163687211755,-3.5711251  
7970013,0.000355450950911198,0.00263720800641801,-5.66533008545147  
"Slfn3",95.0132784080866,-0.555344568509332,0.276801828533056,-2.00628  
937840638,0.044825382604174,0.106911964527974,-1.24161136613804  
"Nars2",581.828805867786,-0.0131674841592691,0.170245540526912,-0.0773  
440767876534,0.938349827693423,0.961780210291035,-0.000513127983473806  
"Slc35b4",3733.9056291598,0.182304337426596,0.156888505562664,1.161999  
32412372,0.245235739472665,0.384373508700805,0.174308564027554  
"Dnah1",68.8021574996828,-1.54232227091329,0.426655992582181,-3.614908  
25800652,0.000300453999537296,0.00231185954340103,-9.36143823987564  
"Dalrd3",6426.43798595767,0.594321445452315,0.26290894677416,2.2605599



8757181,0.0237865178293659,0.0657670908447216,1.61752646613088  
"Fis1",6812.35403669025,0.663202506679293,0.18440405713267,3.596463749  
17962,0.000322572512636245,0.00244823622085695,3.98743041041835  
"Plod1",2674.6529546626,-0.585176817143363,0.127198482781835,-4.600501  
54959028,4.21474885039236e-06,8.72390372451701e-05,-5.46956499649793  
"Rab3d",1476.06374550305,-1.40682055168555,0.337765004040189,-4.165086  
77588801,3.11234162837653e-05,0.000401990692825569,-11.0000447208388  
"Mfsd3",391.561729410917,-0.0314179958765628,0.357822970272247,-0.0878  
03183380482,0.93003310756792,0.956625107161812,-0.00139319024128882  
"Slc25a22",1936.26092248609,-0.708414192418234,0.331483111397725,-2.13  
710493252929,0.0325894578640668,0.0837965514220723,-1.75641623830667  
"Atp6ap1",10086.124906866,0.172253030376942,0.119287464338133,1.444016  
19510221,0.148734419829018,0.266350451673971,0.227880828772111  
"Dnase1l1",928.996644534383,-0.460019817054821,0.146702197764979,-3.13  
573909636844,0.00171421631481824,0.00891229260464894,-2.17144247420672  
"Aldh3a1",909.474475681807,-3.65185807461085,1.14014754319762,-3.20296  
973527565,0.00136018274557986,0.00746225187769162,-17.8864285426474  
"Ccl9",1391.66851418842,-1.44397832082382,0.411878759945711,-3.5058334  
1810136,0.000455180002218723,0.00320980097043785,-8.29066845269971  
"Scrn1",464.174397045188,-0.537370998920011,0.312499242033101,-1.71959  
136740271,0.0855067464546396,0.174998482457496,-0.936625816471225  
"BC005537",13226.4906046577,-0.14456101428805,0.0960358431313291,-1.50  
52818778335,0.132251622309188,0.243199295650717,-0.204391063139265  
"Isyna1",4481.70313487344,-0.271388461375626,0.311800207663564,-0.8703  
92176481349,0.384086120692144,0.528728549933312,-0.172950470403401  
"Hars2",2061.28112886272,0.190125147928607,0.114919079150559,1.6544263  
0879001,0.0980409246378986,0.19433359818486,0.31145906574775  
"Cacng2",0.237219538624863,2.40478170765777,4.73929969109492,0.5074128  
8046762,0.61186514994978,NA,NA  
"Tmem160",1458.17912237514,0.30235418327248,0.264347649577609,1.143774  
81228072,0.252717038163654,0.393018633548902,0.282368044037168  
"Rab5c",11748.7053048495,0.494131625055296,0.191654149721253,2.5782464  
1821726,0.0099303155095468,0.0335740058618248,1.67708429021678  
"Styx1l1",10.591562603136,0.322394908061339,0.484702197940027,0.6651401  
81809593,0.505960836211747,0.640682191483092,0.143537223910459  
"Mdh2",13984.6452011109,0.404462589958394,0.376123543453368,1.07534504  
818505,0.282220274573282,0.426106782065061,0.345033001450039  
"H13",8462.79838322729,0.505485611849399,0.154595377064042,3.269733037  
61858,0.00107649026425403,0.00622646311848861,2.56733454345347  
"Rnf145",4195.43655468341,0.112030135192803,0.192254041157405,0.582719  
273511035,0.560082296405711,0.688466842649681,0.041819518638766  
"Scn1b",1409.95147319752,-1.21651113003563,0.236075063324119,-5.153069  
16751907,2.56257392480565e-07,9.35675400484282e-06,-14.0864837256536  
"Atp6v1e1",9508.56993956761,0.826939361831863,0.275141629989032,3.0055  
0433558465,0.00265140816117199,0.0123394484712482,3.63436041956578  
"Chtf18",148.20076961585,-0.640080906765902,0.336961979661453,-1.89956  
418053156,0.0574903366154172,0.129442676000501,-1.30865639268539  
"Lhx9",2.50833788618998,1.16417374701382,1.25144575549985,0.9302630512  
7291,0.352234903435576,0.497275805313653,0.813303964533779  
"Etnppl",334.439785136472,2.42376692165107,0.862436209258584,2.8103724

0277136,0.00494842059403063,0.0197228750495522,9.51565111991808  
"Rps6kl1",51.0021609941354,-0.710657097509813,0.292172606165057,-2.432  
31939789845,0.015002471241217,0.046196807369117,-2.18516013009299  
"Ppp1r12c",4593.46579773709,-0.122899136440724,0.165403254005645,-0.74  
3027319381092,0.457465140618321,0.597431702061354,-0.0633072265062657  
"Ahr",886.814122048646,-1.15522386627504,0.262909101105617,-4.39400485  
345296,1.11281329410185e-05,0.000185926594759193,-9.9235562459565  
"Map1s",1609.1110741755,-0.363898110234219,0.166398422684895,-2.186908  
41152578,0.0287492107579496,0.0761723211521267,-0.936949250917059  
"Dpep1",4496.2701242526,0.443727016274173,0.19369607616086,2.290841534  
16545,0.0219725804653677,0.0620001988297742,1.23383518965629  
"Tmem129",1156.70380065719,0.196706164984379,0.0618776654698948,3.1789  
5259122344,0.00147808264289491,0.00795244353508968,0.950931899249499  
"Nop9",1105.90061829579,0.158317636398079,0.115293639163278,1.37316887  
164842,0.169699854364535,0.294168541998552,0.193717840460183  
"Hsd17b1",47.7491871119695,0.0247522315598225,0.337758858534127,0.0732  
837375968379,0.941580332418536,0.963774125754455,0.000913315790750429  
"Atp6v0a1",3838.58724768931,-0.16680506277081,0.179659035625757,-0.928  
453513010481,0.353172371046174,0.498058360383214,-0.11626947056283  
"Psmc3ip",154.307164678125,0.0971863009348427,0.233847686625486,0.4155  
96589118666,0.677705223005784,0.78297292368848,0.0237773247477383  
"Grb7",4484.12100826464,0.868375750799705,0.278804787604186,3.11463715  
620451,0.00184171309996518,0.00937101305405037,4.05543118094765  
"Noxo1",486.878943271602,-0.839439969456346,0.355843363254762,-2.35901  
53874961,0.0183234959630772,0.053692744858443,-2.45492321232393  
"Aoc3",2402.82253892576,-3.1691660054809,0.78814575309762,-4.021040515  
69807,5.79416372924601e-05,0.000649136580996668,-23.2612582964321  
"Zfp687",1299.43892567893,-0.028531891267156,0.111800883540762,-0.2552  
0273510856,0.798566518687367,0.871366611526459,-0.00392862692275717  
"Gdpd2",58.1415810456411,-0.479004156906112,0.401048571253369,-1.19437  
941247145,0.232329586346821,0.369491213261853,-0.476910103511839  
"D8ErtD738e",6480.17955902714,0.316869007789777,0.182416841342314,1.73  
706005135325,0.0823765717382778,0.170055944494753,0.561373946582651  
"Sec14l4",33.1097947641034,-2.31929086810656,0.903743645918368,-2.5663  
1499273197,0.0102785440341373,0.0345953826303485,-7.80217578493889  
"Calm3",9681.75625622144,0.166153835723465,0.121310945514435,1.3696524  
6638601,0.170795413353392,0.295463487673182,0.202576419870787  
"Cops3",2032.71928483243,0.253963144788139,0.119998143551595,2.1163922  
8134344,0.0343114580004113,0.0871542613090676,0.619689275932018  
"Fkbp8",12245.1970088634,0.159007378935617,0.107549532016805,1.4784571  
9041131,0.139285447457979,0.253338400609672,0.218321763507533  
"Ffar3",0.246343069730164,0.697171411930329,4.74828381414899,0.1468259  
77388481,0.883269379902654,NA,NA  
"Ddx39b",10438.3319669116,-0.105980272608025,0.142660978827423,-0.7428  
81995336853,0.457553127160444,0.597444061650789,-0.0545898682706158  
"Gipc1",2095.10452516978,0.0138979077342878,0.112422796690312,0.123621  
79329671,0.901614736291258,0.939775885413669,0.00086325258296775  
"Tlcd1",2668.10614056485,0.0602070782583048,0.395966273166114,0.152051  
026409128,0.879146690236147,0.924555139904302,0.00472279897349473  
"Plscr3",2348.91791638481,-0.748746119510165,0.115948393021589,-6.4575

8082538284,1.06389934362007e-10,2.52974504901269e-08,-13.0974880805923  
"Ptger1",887.222772620412,0.280890506335974,0.387114193275345,0.725601  
156494366,0.4680833119305,0.606350538775183,0.140528681391225  
"Arhgef25",2182.50643307492,-0.766351975567456,0.236161798908065,-3.24  
502937863285,0.00117438506936253,0.00664292430589807,-3.84264437872434  
"Xab2",2561.15370406984,0.0169201494826999,0.135988772096153,0.1244231  
3598314,0.900980255816537,0.939378270034268,0.00105813602112408  
"Cdc37",6048.71834411069,-0.656661563942746,0.221530823719818,-2.96419  
953176927,0.00303471443433447,0.0136558647682099,-2.81943302657026  
"Rab4a",889.917580170275,1.15913476025258,0.260836330972374,4.44391606  
004972,8.83360803281923e-06,0.000155169089571089,10.1667653432002  
"Trip10",2770.76448641163,-0.249359266971667,0.151191722981894,-1.6492  
9178696858,0.0990878714253737,0.19596463303093,-0.406410989742252  
"Cd70",2.08392143511821,-1.03256139838511,1.34566263590827,-0.76732560  
6605828,0.442887947466055,0.584224964460668,-0.554969904559537  
"Cops6",4141.7380289456,0.207637522911059,0.291660807883518,0.71191437  
8958948,0.476517797558007,0.614087509371185,0.101247759923324  
"Ubb",57406.3195709234,0.305136509795071,0.197595557820331,1.544247821  
97039,0.122528307692592,0.230159628457626,0.44824009353127  
"Ap4m1",2068.46310785372,-0.280508719028207,0.186217839136458,-1.50634  
719170301,0.131978069483921,0.242787847796725,-0.39707896197341  
"Gyg",1614.5858634761,-0.897359371038913,0.397919986046866,-2.25512515  
707925,0.0241254739837495,0.0664780231395065,-2.43263704009699  
"Rcn3",3250.28710343259,-1.30847344510182,0.304259692343404,-4.3005152  
4414547,1.70401448320551e-05,0.000253431536182616,-10.8347055568937  
"Slc6a8",6870.45301574455,0.969484600410173,0.218416552881545,4.438695  
63739502,9.05056955361545e-06,0.000158125452649099,8.48504734080275  
"Arid3a",991.947700229098,-0.0687614804810522,0.245700809553243,-0.279  
858583315541,0.779586003696074,0.857497366018682,-0.010571195527286  
"Pdk4",6240.73216560477,-2.56200640170429,0.797174948064492,-3.2138571  
4381108,0.00130964813953043,0.00722567046535493,-12.6309868350118  
"Ubxn6",3457.05817806597,0.260610030668009,0.135026405885963,1.9300671  
5211029,0.0535985178211711,0.122573762664461,0.547031474531491  
"Mydgf",2513.58707081421,0.307771497199966,0.11953777573467,2.57467980  
568005,0.0100332921434632,0.0338693092474456,1.0418822318384  
"Cyb561",2046.89202849662,0.438098410787116,0.215695363415153,2.031097  
95153037,0.0422450592287514,0.102195305811687,0.999245317909156  
"Sema6a",924.731336427389,-0.611584044415096,0.208259867323562,-2.9366  
3898030296,0.00331790111361684,0.0145867950199101,-2.58555631956453  
"Ccadc12",3380.08975049828,0.0504101620651454,0.172116021028829,0.29288  
4774838607,0.769610226731033,0.850961789769859,0.00813559784685607  
"Fmc1",1734.56652822903,0.822594437702048,0.298805806297353,2.75293993  
746377,0.00590627309906848,0.0225539586536696,3.11915034107264  
"Akt3",624.835604786145,-0.946391286958881,0.213975018094344,-4.422905  
51199582,9.73823376952881e-06,0.000167663873137123,-8.22749934611814  
"Mrpl24",5530.65378975008,0.417410359211385,0.103008067744385,4.052210  
35935935,5.07360151436882e-05,0.000585355516728777,3.10690684282795  
"Gle1",1991.65366267852,0.258512868060331,0.160556916202524,1.61010110  
417322,0.107375786087878,0.207864682003717,0.406089586409649  
"L3hypdh",1030.97702457013,0.545553999688967,0.230280860786604,2.36908

094674233,0.017832350152564,0.0526117681720081,1.6065558496882  
"Lyst",1179.09169299489,-0.42620748215871,0.250903341961575,-1.6986919  
298348,0.0893772448022123,0.181076217700908,-0.72831921921861  
"Slc35e1",1308.9095952,-0.352484224804954,0.225240209433534,-1.5649258  
4379775,0.117600298137347,0.222986542164932,-0.528953287129135  
"Calr3",75.4472542540622,-0.660610570425248,0.506354198666083,-1.30464  
124157661,0.192015038064273,0.321973616458307,-0.74866049506678  
"Tmc4",3278.45157907638,-0.0282773364095717,0.238293416892201,-0.11866  
6041128462,0.905539941651055,0.942441117052384,-0.00167633244464853  
"Syne4",1965.04051612433,1.6250156201738,0.451745594263564,3.597191961  
1588,0.000321671092844902,0.00244234539263625,9.77413822382859  
"Polr2i",1271.9106403125,0.773387768559368,0.180048794997441,4.2954342  
9363335,1.74351673598683e-05,0.000257929357498265,6.39036764851683  
"Prl8a1",558.127593550975,0.308387983734448,0.181301651005065,1.700966  
21859132,0.0889493307932351,0.180413915555006,0.52811489617016  
"Krt10",443.194341205308,0.928707161852533,0.324622764473832,2.8608811  
9346109,0.00422465335048157,0.0174776768571376,3.758320765801  
"Iyd",1502.68583803592,1.76643231193619,0.565092397153934,3.1259176744  
0646,0.00177251164720856,0.00911884751906925,8.29766007679236  
"Rmnd1",2820.56529738624,0.722549945557431,0.221351957900486,3.2642582  
0855973,0.00109751094729496,0.00631805977276561,3.65924084270445  
"Ccdc170",45.3858978906381,-1.29894865835912,0.584136932872518,-2.2237  
0575332652,0.0261682478942197,0.0709735008264705,-3.43630203884851  
"Esr1",804.109435631075,-0.309722513529882,0.229886424112074,-1.347284  
92439765,0.177888485559937,0.30472636635231,-0.368055981447477  
"Vip",2.34429859947268,-0.0534337171408483,1.23964458165243,-0.0431040  
621898431,0.965618581151535,0.979228745789391,-0.00112157432404405  
"Fbxo5",231.124979443314,-0.0731940547009656,0.22759157988889,-0.32160  
264776359,0.747753737700172,0.835944176232897,-0.0131158946666547  
"Mtrf1l",466.874049755505,0.649305296242398,0.168710703074552,3.848631  
3221958,0.000118779615921028,0.00113862583639538,4.40094789208841  
"Rgs17",51.2269786084997,-0.747369839625624,0.493955488526106,-1.51303  
074261948,0.130271850059516,0.240443064413143,-1.06520527308159  
"Hdac2",3592.30171666,0.102192660462489,0.104378704616911,0.9790566077  
39625,0.32755201024356,0.472312460858521,0.0766561983556302  
"Frk",1130.08058567328,-0.11672059664908,0.305479421171131,-0.38208988  
4161761,0.702394694891011,0.802126628446948,-0.0257355834439189  
"Rwdd1",2526.82039956021,0.320564510193255,0.172145956559469,1.8621669  
4600384,0.0625795619864689,0.137737734888922,0.635488326820233  
"Clvs2",4.37636551808226,0.0847434934636937,0.979166268702727,0.086546  
5816913487,0.931031928121199,0.957120165603645,0.00371399635376463  
"Trdn",16.9563046199428,2.05462438540891,0.728722203346968,2.819489204  
48996,0.00481001489175495,0.0192736683845948,8.11374343581315  
"Hey2",164.631528111694,-0.415339532380345,0.32854604908776,-1.2641744  
8492707,0.206167406700202,0.339228024965447,-0.44901640705028  
"Stxbp5",1653.79846383693,0.140581362181462,0.137224903813213,1.024459  
54250999,0.305618270691253,0.450139374674274,0.112211765317946  
"Hint3",841.369985944673,0.267849810874181,0.34791639443852,0.76986832  
2263016,0.441378006497336,0.583076704890531,0.144487973076331  
"Trmt11",401.964001134685,0.0777647258579026,0.138120221163816,0.56302

2019532323,0.573419889974612,0.699527060922542,0.0277892869606453  
"Katna1",1329.8127189105,0.0367372508283668,0.181251829055985,0.202686  
235055975,0.839380282702206,0.897124821651609,0.00398820594362999  
"Pcmt1",2742.61244249153,0.0885086079516032,0.153356488530296,0.577142  
896266289,0.563842928607685,0.691782621570139,0.0326139619384296  
"Lrp11",396.69896826843,0.659451569537412,0.30554582209303,2.158273888  
41412,0.0309065436201279,0.0804667896254845,1.66175908659706  
"1700021F05Rik",1763.00892322549,0.634955485833924,0.224141547385268,2  
.83283261510872,0.00461375383546802,0.0186404832747525,2.5286591359129  
"Sec63",4472.57088562681,0.420667359290776,0.116779212975832,3.6022451  
9904785,0.000315480573862894,0.00240376718608,2.53692626254615  
"Nr2e1",0.273070954020578,-0.0591317168524064,4.78471990595626,-0.0123  
584489823106,0.990139635359838,NA,NA  
"Snx3",4970.90454734805,0.278599409691524,0.146216608127224,1.90538826  
785745,0.0567296191346778,0.128111433158206,0.572481340478307  
"Aig1",1484.26712379147,0.751705461550696,0.20543455014,3.659099509008  
69,0.000253103053435331,0.002025427025393,4.66205827236832  
"Adat2",127.436146961078,-0.443487783956561,0.311658488540594,-1.42299  
279584293,0.154738243668902,0.27453014331722,-0.573294091564638  
"Pex3",1208.82241000181,-0.317769507706435,0.322949482712804,-0.983960  
417081777,0.325134975562253,0.470009026802552,-0.239917051902509  
"Fuca2",12976.211613761,1.64346016796216,0.374863230334666,4.384159434  
61546,1.16434478514265e-05,0.000191581389204316,14.0683441646881  
"Cep57l1",331.891901594857,0.111074126049917,0.236924633524584,0.46881  
6283041297,0.639200960015621,0.75319636903273,0.0314816621201137  
"Ltv1",1011.49648533325,-0.208876549007841,0.138501981787113,-1.508112  
34837706,0.131525775328177,0.242129018627802,-0.296246384417628  
"Plagl1",1263.03185361598,-0.131560222058719,0.228900214110866,-0.5747  
49231099448,0.565460906714545,0.692939272146326,-0.0482579884214879  
"Cd164",12838.5457988188,0.256964390881553,0.236459288400415,1.0867172  
6376176,0.27716178201099,0.420650768712562,0.222518909810975  
"Utrn",3285.43152663648,-0.644013927094657,0.190749691359092,-3.376225  
26414619,0.000734877245442763,0.00463860036634607,-3.46050747166131  
"Smpd2",3750.76499137887,1.18254086331886,0.24064546071184,4.914037687  
72886,8.92195876403123e-07,2.53217397352374e-05,12.5158318679468  
"Mical1",1457.70642085687,-0.776654045251831,0.353703825423689,-2.1957  
7507911176,0.0281080462357002,0.0747963798883041,-2.01385290493872  
"Zbtb24",913.415330858729,0.162016666960871,0.0983974690158274,1.64655  
319472506,0.0996499177098268,0.196796727996172,0.263371688670738  
"Grm1",6.64102295793139,0.452277527831248,0.668160696806077,0.67689932  
974689,0.498469829400315,0.633996394888933,0.20610830167302  
"Wasf1",102.717001982754,-0.222230793055603,0.286137727670377,-0.77665  
6734031266,0.437361319578199,0.579364835188241,-0.121298653103486  
"Rab32",896.836984027207,-0.621720319757117,0.189751016739675,-3.27650  
586773969,0.00105100128803211,0.0061134913824732,-3.16906840609266  
"Gtf3c6",1707.95466338691,0.426884349756863,0.190618874917526,2.239465  
26775777,0.0251256587706809,0.0687193287572922,1.14307879690493  
"Slc16a10",1473.88111466017,0.379360534261359,0.217905491861147,1.7409  
4067580038,0.0816939778076954,0.16901006399737,0.674426025627988  
"Rev3l",1254.88250071925,-0.0986593106808036,0.158129771803409,-0.6239

13571464956,0.532684346978277,0.664849532542725,-0.0402721910305803  
"Traf3ip2",505.294152067023,-0.359989190887731,0.116922508853967,-3.07  
886988071173,0.00207787413760025,0.0102802308893504,-1.64786224223202  
"Fyn",1396.65006859746,-0.815621809524172,0.228094058589636,-3.5758134  
8048857,0.000349140523621968,0.00260028339556193,-4.85469099003891  
"Tube1",99.6971800135977,-0.416872121841371,0.267386094086313,-1.55906  
433079801,0.118981154892392,0.224992198437771,-0.621843788249291  
"Lama4",1120.88824743714,-2.04973850144638,0.603147091216401,-3.398405  
68129502,0.000677798298292742,0.00435300106064291,-11.1442022953341  
"Popdc3",8.5378840198936,-1.02785890658752,0.924057324152956,-1.112332  
40592484,0.26599525553745,0.407765979437785,-0.922053011200203  
"Prep",1151.28004853586,-0.510488726448327,0.262996594636403,-1.941046  
90653537,0.0522525881145825,0.120250292129076,-1.08130698029152  
"Tnfaip3",851.406242827646,-1.15361024412603,0.310695083832016,-3.7129  
9806195118,0.000204818456155428,0.00172582120056981,-7.33932868788482  
"Perp",3327.08380383514,-0.150204035464346,0.393127312811796,-0.382074  
789945348,0.70240589055817,0.802126628446948,-0.0331183064453305  
"Arfgef3",669.429904840327,0.434377709993346,0.265301625138238,1.63729  
758446451,0.101568305403929,0.199715492009461,0.699722314351572  
"Hebp2",362.400387247797,-0.861724520775344,0.342648509307514,-2.51489  
353482633,0.0119068333932882,0.0387902151215262,-2.80024901722942  
"Reps1",1649.39000009482,0.204158638368421,0.15026853956631,1.35862529  
147913,0.174265356608603,0.300293939297795,0.245601512140325  
"Fam184a",500.724302567768,0.959391208311532,0.395871281803803,2.42349  
28180191,0.0153720572155622,0.046987781673444,2.93369136401969  
"Asf1a",873.328322940159,0.207373773773652,0.161483773310549,1.2841771  
6233848,0.199079974079651,0.330438523419174,0.22963216475023  
"Gopc",2136.16245828545,0.132585397458345,0.0998308265156381,1.3281007  
6893008,0.184144819486014,0.312295006552865,0.154303814201401  
"Qrsl1",666.695581793815,0.403685236219106,0.108790439182022,3.7106683  
2025269,0.000206712797872243,0.00173727850556595,2.56559546795784  
"Rtn4ip1",1652.86618424168,0.800214587541996,0.28173852304907,2.840273  
94934069,0.0045074806408135,0.0183365027195038,3.19994732326453  
"Nmbr",3.0104763859534,-0.736055763336751,1.09621106395114,-0.67145441  
9264612,0.501931087239553,0.637027425567715,-0.331918877634171  
"Crybg1",1243.16733540005,-0.337221125898676,0.202290948972299,-1.6670  
1045010597,0.0955123269522713,0.190660404493114,-0.558863562088104  
"Gje1",0.815289496993794,0.572368818226939,2.11296666337875,0.27088397  
9452704,0.786480267065799,NA,NA  
"Vta1",1276.91489218517,-0.152708186228535,0.107036385387488,-1.426694  
16269718,0.153668068936224,0.273153433140532,-0.19817271413546  
"Smpdl3a",8472.76935137726,1.10170023343887,0.378221845940338,2.912841  
35293617,0.0035815651050148,0.0154703935351304,4.59279787309933  
"Reep3",5391.37728017966,0.121075561615635,0.207687870123279,0.5829688  
63534335,0.559914260999832,0.688348566265745,0.0452168710480131  
"Fabp7",332.221060209876,1.22426356118655,0.453233742868963,2.70117479  
214364,0.00690950153822212,0.0255154282182301,4.49117657231604  
"Pkib",297.916725874967,-0.387318259532159,0.308563663121811,-1.255229  
65216827,0.209395404191284,0.343024920198014,-0.414412016456609  
"Serinc1",7705.24841254919,-0.0286693650199537,0.142848748470343,-0.20

0697348257872,0.840935233313819,0.898239455056056,-0.00307675590147962  
"Hsf2",1127.86085602406,0.384678078877245,0.118539320320576,3.24515171  
705833,0.00117388062942254,0.00664249418790033,1.92887888709164  
"Rspo3",385.007953129595,-1.31077585692675,0.500810721890579,-2.617307  
89624176,0.00886263586968916,0.0308027939727628,-4.56169644081752  
"Echdc1",5598.18879368375,-2.54633595608299,0.744817580780275,-3.41873  
771751659,0.000629123369936436,0.00412130382311354,-13.9834221334042  
"Mgat4c",32.0114464377298,2.29777889248207,0.496342693593373,4.6294202  
012864,3.66690998928575e-06,7.83104172739251e-05,21.725108623855  
"Ptprk",3880.00335583405,0.66950209527979,0.27307468691834,2.451717890  
20488,0.0142176079395599,0.0444753601164027,2.08403947768968  
"Nts",4.25080026085889,-3.37616375528992,1.41348560146352,-2.388537776  
25626,0.0169155692087961,0.0505221716225503,-10.0790068236505  
"Dcbl1",801.027048841094,0.806004960136097,0.197165924201722,4.087952  
63887216,4.35196970269209e-05,0.000520261834844208,6.09434725019723  
"Lrriq1",68.5388768372923,-0.0785367496126881,0.537762072753294,-0.146  
043675431752,0.883886910021733,0.92780764315498,-0.00588482530769354  
"Ros1",45.3365828237004,-1.21486500406794,1.03678177411985,-1.17176539  
402351,0.241291260047272,0.379830393693235,-1.17602632664093  
"Slc6a15",1261.06161800125,1.8656366259745,0.670553922051464,2.7822320  
6907336,0.0053986421111898,0.0210701770453112,7.20116455988293  
"Ccdc59",1528.11338633063,0.113821581049374,0.12153600825952,0.9365255  
83482443,0.349002646707494,0.49398817470247,0.0802719529511407  
"Lama2",1382.56565701621,-1.04732920599118,0.263146351789682,-3.980025  
55942044,6.89078590556915e-05,0.000742711683730168,-7.54621915156413  
"Lin7a",49.3162285993215,1.9026707048247,0.425325921713489,4.473441677  
75975,7.69705589773262e-06,0.000138447597688183,16.9052647161525  
"Ppp1r12a",6342.63051491988,-0.0909384355534218,0.233695279518562,-0.3  
89132530792941,0.69717811012797,0.797943472534031,-0.0205263981880724  
"Fam162b",0.0825764842869715,0,4.78471990596623,0,1,NA,NA  
"Sim1",652.774009582998,1.19681478046614,0.49779293401865,2.4042422032  
8788,0.0162060320846381,0.0490051509904272,3.60938975677735  
"P4ha1",2607.95956960249,-0.0573963897089604,0.158617179455814,-0.3618  
54812359398,0.717460529326743,0.812749558494819,-0.011900123367658  
"Sept10",881.562888061468,-1.23969196391863,0.268341548788026,-4.61982  
860841991,3.84057164209049e-06,8.12185096285036e-05,-11.6758743612653  
"Lims1",2849.59300137075,-0.635669754463551,0.127248461099363,-4.99550  
052685652,5.8683363696585e-07,1.7850362330047e-05,-6.95008683865642  
"Zwint",3338.04811948802,-0.321459947842522,0.25028437465525,-1.284378  
81224232,0.199009442770084,0.33036185054892,-0.35603833632793  
"Ube2d1",1670.25641051752,0.0213297440081422,0.0797772023548309,0.2673  
66407677125,0.789187061040307,0.864081834914865,0.0031160153410225  
"Dcn",14693.7527814593,-1.69505496894872,0.39486895362286,-4.292702562  
19655,1.76511392865003e-05,0.000260926394092633,-13.9863599518881  
"Mrln",17.3685440388228,1.62330098996105,0.519484068137929,3.124833059  
42319,0.00177905993646907,0.0091428863050274,7.62103965007445  
"Slc17a8",23.515215813102,0.286660395063299,0.384471008596093,0.745596  
90757971,0.455910951541524,0.596080717035918,0.148312122950888  
"Epyc",38.1935727744808,-5.83652722489871,1.44581209158476,-4.03685047  
238833,5.41735724088025e-05,0.000614187169781651,-43.162349398564

"Cdk1",248.638186971673,-0.733503471769622,0.351323682371185,-2.087828  
14417461,0.0368133398296732,0.0919885300524117,-1.75020631342588  
"Atp2b1",7657.70002286835,0.541970207455098,0.281854294367222,1.922873  
69142929,0.0544959145098767,0.124102001998783,1.13090292182277  
"Rhobtb1",1919.65835631782,0.566762110156609,0.275754169510862,2.05531  
655663428,0.0398484391776439,0.0976209155780501,1.31866472030623  
"Caboco1",342.147068461224,1.96467359443308,0.448086511032665,4.38458  
54451304,1.16206864257404e-05,0.000191420081543051,16.819649553462  
"Arid5b",2747.89659114527,-0.369340021872007,0.147293568843464,-2.5075  
0949122919,0.0121585316215128,0.0393537598864969,-1.19487545344797  
"Actr6",488.744472770628,0.0257773329144534,0.25710078271879,0.1002615  
88634088,0.920136651615194,0.950948988554825,0.00129646729005879  
"Uhrf1bp1l",4154.07345588154,0.562403775437795,0.200351475699556,2.807  
0857650241,0.00499919297751019,0.0198848084546076,2.20338508006127  
"Poc1b",732.041913505507,-0.0344595394035692,0.120694752690136,-0.2855  
09838957444,0.77525356757074,0.854681333285893,-0.00541106393539575  
"Dusp6",2315.83205108691,-0.513929819624939,0.25027515015844,-2.053459  
23995886,0.0400280589730824,0.0979706534452973,-1.1939038369576  
"Tpo",4159.92513092248,-0.318146844872485,0.149818033250528,-2.123555  
07524568,0.033707365512132,0.0859793580266288,-0.780620380598953  
"Kitl",1415.78497546626,-0.522661200079235,0.269099475818158,-1.942260  
19389357,0.0521056093169796,0.120001462763557,-1.10817311327211  
"Psen1",2756.43872011621,0.243763096805025,0.12469690168547,1.95484485  
58881,0.0506013849379265,0.117484395634833,0.522006424497873  
"Sgk1",5225.66268498313,1.0064954938899,0.282830239217191,3.5586558802  
0448,0.000372757536780104,0.00273995300565272,5.93813671905178  
"Cep290",939.71190741501,0.241004672987619,0.145581095733649,1.6554668  
1575027,0.0978298423602432,0.194007960368188,0.395212980219512  
"Ikbip",1523.34917333235,-0.0849247191845358,0.151094521319626,-0.5620  
63524493293,0.574072738948902,0.699885591447864,-0.0303044007516622  
"Hbs1l",2603.37307464168,0.111828079208054,0.0964404734742034,1.159555  
47686072,0.246229837151938,0.385312148056861,0.106650606773307  
"Epb41l2",3934.60870050772,-1.34447011854846,0.272071151252499,-4.9416  
1219357179,7.74792103752206e-07,2.25476066253142e-05,-14.385671128916  
"Apaf1",897.734027886504,-0.443213382531767,0.438991245312013,-1.00961  
781644815,0.312678430361112,0.457737370311657,-0.346353391013468  
"Myb",37.8204740513367,-0.754089930914188,0.448690489051709,-1.6806461  
231392,0.092831671290717,0.186469748840123,-1.26648367601427  
"Med23",1117.38608353004,-0.312352653096673,0.144020830355565,-2.16880  
19179276,0.0300977255782972,0.0788982862766387,-0.793249477040136  
"Ahi1",749.890815030738,0.238231064201415,0.191396009797501,1.24470235  
535979,0.213241179867442,0.347669247015251,0.251691998585605  
"Arg1",16.8425525120395,-0.119523188042559,0.458682421874797,-0.260579  
39511618,0.794416881161874,0.868150451120626,-0.0168994132657461  
"Nedd1",870.200891519689,-0.0632361765527445,0.117719707589179,-0.5371  
75786856587,0.591146194836473,0.714358134919216,-0.0212708066395259  
"Enpp3",1606.25551088308,1.24039496948901,0.315284427509766,3.93420943  
522681,8.34709775866617e-05,0.000858788192022722,8.75717389934055  
"Pde7b",497.637940251351,-0.157327445962752,0.230259835040361,-0.68326  
0482381457,0.49444226029372,0.630395291388672,-0.0725921751799548



"Mtfr2",59.1648288055146,0.164836207357645,0.253264387613059,0.650846370116133,0.515145663725493,0.64885724491729,0.0712986731462842  
"Map7",3608.43088975925,1.08478148620264,0.325599130142288,3.33164737181142,0.000863335750339946,0.00526370245782623,5.69176233787348  
"Ccn2",8405.67150006053,-0.153565959448693,0.374903440172885,-0.409614698061659,0.68208861323492,0.786153796822987,-0.0369484052697449  
"Stx7",6429.90256488478,0.293129236580567,0.194679793981262,1.5056993362587,0.132144374446254,0.243024996505666,0.414657972473942  
"Moxd1",51.5523746613859,-1.75952963533747,0.612333513753685,-2.87348249902463,0.0040597357009529,0.0169827776651319,-7.17106073014684  
"Pex7",2166.52098775507,0.373006800271594,0.358675630625223,1.03995579410118,0.298360438929845,0.44269323782468,0.303955115293112  
"Il20ra",4.64050495835498,-0.944603440847644,0.749089592323766,-1.26100195561037,0.207308142566577,0.340358215204035,-1.01805263229936  
"Ifngr1",3965.83617026443,-1.19610946138763,0.176654423325469,-6.77090014997195,1.27983583933086e-11,4.79889215293712e-09,-22.9113340934092  
"Vnn3",168.225118322767,-3.51936988807218,0.83184248283801,-4.23081287705467,2.32848317725334e-05,0.000323828566263094,-28.279179835296  
"Cfap54",40.4129029913575,0.238406866810013,0.554101546730359,0.430258439480641,0.667007655730552,0.774569897397634,0.0609004082566383  
"Cdk17",1363.94423168451,-0.813730857233254,0.180198409424893,-4.51574938885583,6.3093245312101e-06,0.000118744410916539,-7.35493660934371  
"Hal",14.0306207674343,0.873120297034063,0.818646143845158,1.06654175750837,0.286178812821289,0.430250172903809,0.736379567013635  
"Snrpf",1136.94982320609,-0.143395100208544,0.200292672527498,-0.715927838991997,0.4740359075653,0.611697691972748,-0.0704811417834967  
"Ntn4",4008.88496008652,0.981078624500264,0.308430551022117,3.18087368857929,0.00146831633882091,0.00791518716459221,4.74741193401471  
"Usp44",0.476823137666417,-0.0831927920379075,2.49932039745733,-0.0332861653602088,0.973446386090589,NA,NA  
"Fgd6",660.675572726745,-0.655874442564926,0.261521748888651,-2.50791548065159,0.0121445712203478,0.0393151003908917,-2.12250584736022  
"Ndufa12",4712.68314314497,0.471267588809135,0.405252316290087,1.16289918617465,0.244870407666493,0.384022325100759,0.451028808894303  
"Tmcc3",2604.51747457516,-0.348227021816,0.261052372067923,-1.33393548220813,0.182225001768352,0.310312656117172,-0.407486527968609  
"Cep83",887.434304913525,0.0395055012400728,0.158330671529394,0.249512623539519,0.802964277458341,0.874452495636881,0.00529995168731354  
"Socs2",2301.74479436256,0.594358962502691,0.355374405069232,1.67248669016245,0.0944283902785013,0.188992481384748,0.990230587949738  
"Nudt4",18482.3292859623,0.827774838264331,0.266407515955169,3.10717524352289,0.00188884391996265,0.0095582061522981,3.84944703224217  
"Nuak1",964.516389719483,-0.523267938023764,0.242897615095854,-2.15427367542192,0.0312187160378463,0.0810738579256695,-1.31465560124954  
"Tcp11l2",1121.08670561117,-0.348022947530742,0.151699304256984,-2.29416310928611,0.021781131449131,0.0615312229781449,-0.970361251267342  
"Rfx4",2.73968309601108,-0.175599725141846,1.42679864635961,-0.123072534158816,0.902049660473301,0.940001935145635,-0.0108649423852009  
"Cry1",350.876515499085,-0.903848891909155,0.218066438968188,-4.14483263076081,3.40061997285427e-05,0.000429160441622735,-7.00815482237803

"Btbd11",253.407822934952,-0.255570482232064,0.27685377327365,-0.92312  
4432114754,0.355942363652134,0.500986371651578,-0.176644280887009  
"Timp3",58257.077358388,1.06725936848604,0.260049692635463,4.104059334  
46774,4.05963272015602e-05,0.000493903626034222,8.12522716519385  
"Hsp90b1",31075.1253518324,0.135460316801884,0.134311717403602,1.00855  
174381272,0.313189660236061,0.458331866180692,0.105680958978704  
"Pah",17796.9946693161,2.46561243975321,0.916366453949898,2.6906402227  
2472,0.0071315057691143,0.0261323246544241,8.98612730481613  
"Ascl1",9.69450073384086,-2.2877274961835,1.07875660886791,-2.12070774  
57299,0.0339464042904445,0.0864759590874166,-5.600102591539  
"Igf1",3352.7765810068,-1.88185532230348,0.445957137947859,-4.21981208  
993116,2.44506030869573e-05,0.000335967483431638,-15.0520126033418  
"Washc3",1185.78811266362,0.0786773028475025,0.255533416134596,0.30789  
4380459662,0.758162701963684,0.843181403313251,0.013420235878419  
"Dram1",1346.82096338611,-1.72013190595719,0.412540296623819,-4.169609  
4176364,3.05122101001397e-05,0.000396516438679571,-13.4734372523066  
"Sycp3",77.2393606229345,-3.18757285988758,0.91005250669231,-3.5026252  
18267,0.000460697184021967,0.00323933418465933,-18.27240271809  
"Mybpc1",5.53045026738124,-2.22097415269265,1.26959239251938,-1.749360  
00387128,0.080228809886107,0.166627751934311,-3.9799701012358  
"Slc5a8",6901.68271613059,2.14983996191889,0.807486168403525,2.6623861  
1389384,0.0077588820256592,0.0278195442692724,7.70076216011604  
"Sirt1",1515.57249424259,0.361893329208786,0.101356674563468,3.5704933  
1745958,0.000356309544916245,0.00264257265377594,2.14819965128081  
"Herc4",2602.23535719522,0.806093721027524,0.186666418005568,4.3183649  
7234055,1.57189342322785e-05,0.00024000609213858,6.71866722868806  
"Mypn",0.881196202938074,-3.31922066815453,1.92955976111496,-1.7201958  
3691805,0.0853968495259048,NA,NA  
"Hnrnp3",4129.77601018415,0.0356974839143319,0.141728506380757,0.2518  
72293202821,0.801139776117769,0.873096823691072,0.00484446342394221  
"Rufy2",873.805236159182,0.0446535508848905,0.156121111750744,0.286018  
658105525,0.774863831144808,0.854443956493554,0.00702419846215129  
"Pbld2",718.781731341479,1.55250195544475,0.499542410411433,3.10784814  
880098,0.00188454871655388,0.00954165953657949,7.22237548873632  
"Ccar1",8561.6261316634,0.853090566673217,0.278655391375149,3.06145365  
594135,0.00220265087023031,0.0107691290541,3.86541448908991  
"Ddx21",2780.92884484718,-0.272210941520589,0.155354867585235,-1.75218  
804374598,0.0797414788580564,0.165951473452277,-0.488907146052197  
"Ddx50",4053.53722294141,0.124273290902358,0.143864581153789,0.8638213  
09635007,0.387686059735509,0.531956565286626,0.0784404856332897  
"Srgn",2438.82438193223,-0.996307434741079,0.265872492589167,-3.747312  
95080081,0.000178739030979614,0.00155196078648198,-6.44435173998442  
"Vps26a",2868.4363268434,0.0713256624286686,0.16103060346268,0.4429323  
42641309,0.657814672758246,0.767155361531209,0.0189060038091187  
"Supv3l1",1028.35818506198,0.808586536775082,0.22522376901151,3.590147  
43569876,0.000330490974004215,0.00249764070198999,4.84538100729226  
"Hkdc1",151.155206893769,1.18591219276991,0.493365970967944,2.40371704  
283383,0.0162293297587227,0.0490527781174354,3.57535740255833  
"Tacr2",0.792339290665846,0.309101467168361,2.49846685248265,0.1237164  
57098967,0.901539780888116,NA,NA

"Fam241b",323.277551677549,0.10151769290323,0.195935322076384,0.518118386350237,0.604375672656677,0.725533608266216,0.0325717369006622  
"Aifm2",2294.892986328,-1.94192103286756,0.630979974436387,-3.07762704292185,0.0020865587691984,0.010306752365993,-8.88420333720692  
"Macroh2a2",586.555829648282,-0.0230588428823005,0.285791122129102,-0.0806842518777892,0.935693061160815,0.959820915915004,-0.000945609892154088  
"Tysnd1",2601.18757959084,0.374746771584055,0.307379486590359,1.21916649592,0.222781005555725,0.358753224836928,0.384160606424929  
"Sar1a",7447.15981045031,-0.358564281336482,0.16287608851316,-2.20145439769393,0.0277038716398589,0.0740364568469885,-0.933413693473616  
"Ppa1",2612.70737133551,-1.60801907948484,0.54382842187224,-2.95685001888815,0.00310799254703952,0.013889442741732,-6.87689659361512  
"Npffr1",8.16724879652471,-1.97315146484747,0.910263987404491,-2.16766948066755,0.0301838431329613,0.0790284105554558,-5.00775554532381  
"Eif4ebp2",9190.81027545635,-0.224543328427513,0.258503019993328,-0.868629420396359,0.385049857197014,0.529643290731635,-0.142708857141895  
"Pald1",1267.56037046727,-0.798431314984797,0.2111399520259,-3.78152645827473,0.000155869651867007,0.00140182032846075,-5.24568068694977  
"Tbata",1.96901944969045,-1.79439898464115,1.38988880048392,-1.29103780389941,0.196690569077795,0.327643974017842,-2.00224010122324  
"Sgpl1",4639.27427491163,-0.676124630679696,0.206704957827045,-3.27096474988967,0.00107181269358473,0.00621046178291679,-3.43574084993983  
"Pcbd1",6460.26313934828,1.88119761411863,0.561022341798039,3.35315989037,0.000798945382114974,0.00495793668379305,9.98307481543901  
"Unc5b",1624.08599973466,-1.35373209834534,0.177773535107479,-7.61492478352812,2.63845069944692e-14,3.42963411585441e-11,-32.619504869123  
"Slc29a3",3162.77377087626,0.449398732624478,0.293863377727137,1.52927777561232,0.126195596728728,0.235177928866578,0.650465526086231  
"Vsir",1711.81907530698,-1.51484078123754,0.252174080486286,-6.0071232472281,1.88843965970486e-09,2.4756458072675e-07,-23.0431434792405  
"Slc16a7",3783.17191492554,1.08772877079342,0.386427366549933,2.81483369178738,0.00488024821741057,0.0195149876421393,4.28192317918085  
"Lrig3",463.49102624995,0.443061756119737,0.139401176673706,3.17832149406317,0.00148130399732935,0.00796757664549728,2.141040505857  
"Anapc16",2496.56485823178,0.389764892348273,0.146860546162024,2.65397959175683,0.00795486378644556,0.0283657523972413,1.38856578945548  
"Ddit4",3281.15716483881,-0.190690978334628,0.252574942706946,-0.754987712917668,0.450256354663953,0.590906535857694,-0.100322031688472  
"Dnajb12",2656.69741862979,0.652747157019673,0.156891220715207,4.16050786044017,3.17540687110983e-05,0.000407329494558549,5.09527128559301  
"Micu1",2375.87954662438,-0.200820423611063,0.146205402121322,-1.37354995572887,0.169581442295995,0.294015557699387,-0.245828818220081  
"Cand1",2754.81189985564,-0.212098917591405,0.182389367778499,-1.16289079881557,0.244873811056402,0.384022325100759,-0.202990242572709  
"Tbk1",2117.36724494139,-0.0118941254498833,0.265519078336886,-0.0447957469737533,0.964270115114977,0.978482952401665,-0.000258719999515495  
"Pno1",1743.99711991424,0.217320571518774,0.175983692190076,1.2348903970264,0.216871297867093,0.352262293053364,0.226747770607281  
"Plek",974.553246433903,-1.39106513978762,0.389730628488753,-3.5692989

9295241,0.000357937730253217,0.00265061521628455,-8.25313871277904  
"Srgap1",1062.76844005477,-0.748991459535995,0.312782826614633,-2.3946  
0544443124,0.0166382586141878,0.0499534670756096,-2.24447526776898  
"Egfr",2045.8512467421,0.514076328734156,0.164063283365338,3.133402661  
39502,0.00172792219414061,0.00895561588021094,2.42411380420123  
"Avpr1a",652.694298938241,-1.30858253269187,0.302785520925939,-4.32181  
343642237,1.54752016795753e-05,0.000237586993975086,-10.9200907599132  
"Usp15",2644.29309762966,0.00664462306407063,0.145727989361526,0.04559  
60662957235,0.96363220455447,0.978160984057015,0.00014672003562058  
"Elane",3.44564089653987,-1.02940204351824,1.49581199316388,-0.6881894  
57112783,0.491333482224558,0.627745248438138,-0.479311054667241  
"Vps54",3004.27801075855,0.00757856832706495,0.093814303283805,0.08078  
26531966926,0.935614803720466,0.959820915915004,0.000310786157615005  
"Tbc1d15",1649.03648177436,-0.410373793468491,0.180058419106899,-2.279  
11472012234,0.0226602467096616,0.0633940843275661,-1.13196880509699  
"Pcsk4",387.616136793588,0.99794863982775,0.318118896054709,3.13703037  
51341,0.00170668444781157,0.00888714797334867,4.71346021388578  
"Rab21",4435.22784440215,0.158694962781701,0.132258871611339,1.1998814  
2079458,0.230185396576219,0.366979138384555,0.159083809269215  
"2310011J03Rik",1443.46096630617,-0.0949653381503064,0.199940886382772  
, -0.474967075861123,0.634810440631731,0.749472235630487,-0.02738667457  
57904  
"Peli1",2057.05084939743,-0.19292227913734,0.155861762921241,-1.23777  
778653268,0.215798467191432,0.35092898359454,-0.202022639867577  
"Apc2",132.637664011076,0.0696321595124852,0.27257649268523,0.25545915  
1398269,0.79836848959423,0.871248044445531,0.00959730037617695  
"Thap2",1642.28478184678,0.412606658164989,0.38750165526896,1.06478682  
75004,0.286972407401207,0.431011246303246,0.347258467741155  
"Lgr5",86.3095850965161,-0.539973041110653,0.307041332707963,-1.758633  
06854598,0.0786398524684135,0.164114293420649,-0.975835058810459  
"Slc1a4",871.760280439621,0.739283663729592,0.290545196265758,2.544470  
44119559,0.0109443574246338,0.0363655557371354,2.45008455140494  
"Dock2",1086.04458287618,-1.45215302770649,0.422730640795921,-3.435173  
34104849,0.000592174912622914,0.00392062018550818,-8.04711388402236  
"Rab1a",9630.42052201129,0.219901137725894,0.195260530703077,1.1261934  
8587292,0.260083630198351,0.401513113349759,0.200663105434698  
"Gamt",710.234650559434,1.03415468189034,0.184593161749641,5.602345569  
51215,2.11470419785813e-08,1.4267301885757e-06,13.9198516116081  
"Ptpr",177.906881544686,-1.00238259640117,0.303648817589749,-3.301124  
6490525,0.000962980895574102,0.00570471671332131,-5.17877154641595  
"Actr2",9524.22119966596,-0.121714462919273,0.131233789731445,-0.92746  
2836883306,0.353686278460373,0.498638832785275,-0.0846978361183712  
"Ndufs7",5574.35355535001,0.62851163119713,0.322580240723321,1.9483884  
995182,0.0513684948602357,0.118770599889683,1.33908260727665  
"Ptprb",3778.0131597574,-0.695107195359024,0.229147025975306,-3.033455  
01605564,0.00241770753502151,0.0115427182952618,-3.10136011514975  
"Kcnmb1",118.217024477653,-1.21149917579201,0.266019192256546,-4.55417  
95895074,5.25904144594432e-06,0.000103263635561956,-11.1194123513996  
"Pwmp3a",3373.77858483167,0.00459189639073881,0.238671389973001,0.0192  
394085912779,0.984650119903959,0.990083442725357,4.57630865850839e-05

"Gabrp",688.103565834474,-0.400415125429044,0.673241592858584,-0.59475  
6963438461,0.55200593886661,0.681893803599922,-0.153311482367154  
"Meis1",894.364826289196,-0.979210929528355,0.17947429710653,-5.455995  
34482158,4.86992687313448e-08,2.66724253293191e-06,-12.5676487731991  
"Uqcr11",8230.59218289078,0.600791955714506,0.415443455286165,1.446146  
15555965,0.148136212292144,0.265376687547981,0.797013612333792  
"Cnot2",2359.98142782369,-0.186344295818164,0.0808004140936424,-2.3062  
2946563371,0.0210978139649695,0.0599482915606203,-0.524423700980502  
"Tcf3",3124.71156762952,-0.154159461860155,0.172160777437899,-0.895438  
927230467,0.370552499377409,0.515716403431358,-0.102084129000704  
"Best3",8.10724940277305,0.18522306352235,0.694943364083339,0.26652972  
471601,0.789831270037944,0.864592976824603,0.0269492944620526  
"Frs2",1581.6346914161,-0.124116011131099,0.10679930993477,-1.16214244  
461791,0.245177608932752,0.384344188693584,-0.11868181538111  
"Yeats4",1583.25862716725,0.15396272847802,0.111291171612214,1.3834226  
5830836,0.166535306949702,0.289587263650086,0.190805793631206  
"Cobl",1520.98187277388,0.762263696247411,0.427979520803734,1.78107516  
643764,0.0749001720395825,0.158052332730279,1.40624623421592  
"Rab36",561.377322512199,0.318368813375793,0.265141761419908,1.2007494  
0918715,0.229848421673339,0.366561796645408,0.319511171273704  
"Grb10",2398.89581136404,-0.451993366900764,0.184020456636802,-2.45621  
261440979,0.0140410057416177,0.0440643054804541,-1.41117085192662  
"Adora2a",745.091098430726,-1.7568169147561,0.287247694476546,-6.11603  
4866555,9.59323444865566e-10,1.52072264455194e-07,-27.5801106400722  
"Snrpd3",3463.64699069022,0.370961295592671,0.204971180102731,1.809821  
72911697,0.0703234371255474,0.150578341431355,0.702330555814209  
"Nav3",446.216909311531,-0.988684162837774,0.454480801088372,-2.175414  
58400468,0.0295990625936826,0.0778527616958889,-2.52404729974702  
"Ddc",1832.69311227291,1.47338056235468,0.690314058335303,2.1343626782  
1019,0.0328131041951132,0.0842383022509963,3.64529904879523  
"Cpm",1741.88583392118,-0.205005198389509,0.431551831324367,-0.4750418  
91863555,0.634757114535821,0.749472235630487,-0.0591206303688682  
"Mdm2",3213.58079182029,0.114938386208048,0.140323718819209,0.81909449  
9313637,0.412732500027422,0.55618621090156,0.0674288489852467  
"E2f7",76.2353500971066,-0.137496519144603,0.418255143559714,-0.328738  
381970365,0.742353440624983,0.832101603064439,-0.0252719601167392  
"Csrp2",5593.36119340574,1.42867766089979,0.23388737095103,6.108400188  
90513,1.00634762554276e-09,1.56974128022662e-07,22.3833569827268  
"Osbp18",4731.91919000265,0.77963160637234,0.239398262284465,3.2566301  
815756,0.00112743217919774,0.00645031473884905,3.93217051525386  
"Mknk2",10089.0215248477,-0.946844012532097,0.415647476572082,-2.27799  
774063561,0.0227267122120547,0.0635032150631473,-2.61013150689348  
"Spata48",16.3942736827443,-0.884431972685696,0.644517392805344,-1.372  
23910876337,0.169989014358764,0.294412485406923,-1.08145996403268  
"Zbp",33.3917008199443,-0.384630648969617,0.403723778208347,-0.952707  
444373323,0.340738320454502,0.485374959860049,-0.278023946522008  
"Cabin1",3210.15578275643,-0.0337609004610678,0.18015773471094,-0.1873  
96341962428,0.851349890492321,0.905400903502742,-0.00335507206505602  
"Ap3d1",7711.35240197909,-0.0256761412800455,0.170117319831389,-0.1509  
31964514221,0.880029385281767,0.925103135336634,-0.00199888888307196

"Phlda1",1433.1017464221,-0.342038006856421,0.277309750690076,-1.23341  
500255678,0.21742097051843,0.352802437014677,-0.356351287485639  
"Sf3a2",1720.88658148184,-0.101850085019922,0.150215808803687,-0.67802  
5074930877,0.497755794684954,0.63337743814966,-0.04651378961793  
"Mdm1",349.163096979937,0.171945866409655,0.125909538764642,1.36563018  
256358,0.172055068127066,0.297299691451749,0.208572844097163  
"Jsrp1",35.9001671407441,-1.491370400991,0.626423215469134,-2.38077128  
07612,0.0172764350026834,0.0514253065148257,-4.42582791180496  
"Wif1",87.7066252203659,0.138548031124065,0.540224751061962,0.25646368  
6367036,0.79759281702843,0.870693955905063,0.0191840163897017  
"Timm13",4063.80663206274,0.624095960786556,0.256740502790213,2.430843  
41583812,0.0150637230803117,0.0462830873967723,1.91783357405058  
"Vps13d",3204.06114691627,0.209399667031429,0.132896809716697,1.575656  
08593477,0.115105083019681,0.219343130249975,0.317683997876224  
"Llph",2518.06244633669,0.294702461991108,0.137448783462532,2.14408927  
141537,0.0320257345398321,0.082597588896514,0.734921569968503  
"Tmbim4",8562.33316233588,1.42088442137773,0.261587272310383,5.4317796  
4595999,5.57947941476066e-08,2.97236856909845e-06,18.0823903038329  
"Slc5a4b",4.47901767348701,2.53633056626031,0.687032131525846,3.691720  
44490454,0.000222742217463069,0.00184182686857291,15.9712668204003  
"Irak3",308.84019992766,-1.38180986885032,0.232856964584228,-5.9341573  
5414046,2.95358462272876e-09,3.25361542225792e-07,-20.6419302087476  
"Helb",818.695794079076,0.219932339061005,0.104974204652704,2.09510841  
057218,0.0361613564599436,0.0906731132016435,0.527946348821169  
"Prmt2",1055.18167185358,-0.672676270937672,0.149193128693332,-4.50876  
17427768,6.52070870176302e-06,0.000121549501211257,-6.06430369193528  
"Dip2a",1422.34519092315,-0.233440768297111,0.174759986764674,-1.33577  
927429953,0.181621429189199,0.309604356210089,-0.273699978819378  
"Hmg20b",4502.87555414134,0.537638915553015,0.244743698251582,2.196742  
63073508,0.0280388323779897,0.0746655495364713,1.39503130589403  
"4930404N11Rik",24.9570920155612,-0.701912066351259,0.516715857570194,  
-1.35841015147461,0.174333574880766,0.300358402670776,-0.8442449822210  
16  
"Fzr1",1345.15137220325,-0.296064430578385,0.100543870571307,-2.944629  
3334054,0.0032334177529717,0.0142894785465644,-1.25775032246643  
"Ncln",3165.3602486975,-0.0511676238393806,0.0833292401479435,-0.61404  
1646708131,0.53918780700759,0.670178100403773,-0.0204778858367847  
"Col6a2",2782.71934420822,-2.0449508864107,0.350175498012852,-5.839788  
61460962,5.22670966974482e-09,4.94710607479051e-07,-29.6912408382576  
"Hcfc2",861.453192265237,-0.0335581006232084,0.117388551365534,-0.2858  
72005684033,0.774976155598067,0.854443956493554,-0.00527883570553893  
"Nfyb",960.322439823721,-0.0165629685500713,0.084744452349026,-0.19544  
6050932697,0.845043768242724,0.90075789378945,-0.00173114103113821  
"Txnrd1",5448.70665224274,0.117324673032712,0.161441983558937,0.726729  
630337336,0.467391598362826,0.605769834145066,0.0588095997124388  
"Glt8d2",29.0303871443468,-1.62016777498643,0.859877131927079,-1.88418  
521068871,0.0595399273131652,0.132795263079857,-3.27103240244893  
"Ppm1m",2954.94449764547,-1.09086815170203,0.284561642835875,-3.833503  
84412563,0.000126330825841661,0.00119456762476271,-7.34151100325585  
"D10Wsu102e",6580.00589529916,0.449475135535362,0.136510290926558,3.29

260990130904,0.000992620946354847,0.00583834787693117,2.31178879968246  
"Aldh1l2",105.259137871768,0.49841683337038,0.248015960032741,2.009615  
96707156,0.0444718500011215,0.106322536162412,1.11709068885227  
"Wdr82",3267.29104154518,-0.170625953606582,0.0646702504837962,-2.6383  
9945461993,0.00832983976983518,0.0293771536893514,-0.601889533789106  
"Glyctk",5297.70223940503,1.63933543654657,0.546035386927594,3.0022512  
7490492,0.00267990869535689,0.012435437468539,7.19210065983555  
"Pofut2",2339.40793515391,-0.248810845873851,0.106900725499694,-2.3274  
9445535393,0.0199389637555837,0.0573322393904101,-0.711323379432806  
"Slc36a1",4280.47089226137,1.00358293602534,0.256176740465038,3.917541  
20301295,8.94567590186447e-05,0.000906092409010667,7.03147263325208  
"Adarb1",840.329567657053,-0.569047157369254,0.247865489385525,-2.2957  
901835385,0.0216878809922516,0.0613155240548429,-1.58862159395489  
"Appl2",3318.77578708128,0.0491613713484433,0.191575607637534,0.256616  
027242142,0.797475201284114,0.870614304291022,0.00681161376519814  
"Slc36a2",2279.97237488021,-3.63210955117652,1.16067598446317,-3.12930  
533568023,0.00175220128811657,0.00903581611100153,-17.0947380107302  
"Sumo3",4460.86878976882,-0.474761339878937,0.198868825058982,-2.38730  
902009467,0.0169722183909958,0.0506542651442885,-1.41608576659242  
"Hint1",10552.8638575895,0.812280255422087,0.286102388548806,2.8391243  
412619,0.00452375254222722,0.0183873519008435,3.24594683142934  
"Lym7",205.967145445328,-0.452220304946726,0.361853101455451,-1.24973  
450034779,0.211396549965329,0.345325899063672,-0.480830779045163  
"Fbxw11",3085.43309792434,-0.186935254363077,0.22171626664722,-0.84312  
8279173651,0.399156704473142,0.543412751278964,-0.114009216326577  
"Stk10",868.228674679265,-1.06289383949226,0.219805203106225,-4.835617  
28508582,1.32733083889386e-06,3.42785386711952e-05,-10.927602098047  
"Papolg",533.049232310359,-0.0672842135551669,0.120095003598214,-0.560  
258225065472,0.575303317292159,0.700967946056096,-0.0239056180947258  
"Rel",498.722644971526,-1.13070523049397,0.246530798142591,-4.58646643  
345543,4.50810842325673e-06,9.16990218915506e-05,-10.5121652221121  
"Pfkf",4346.25782104933,-1.57285302238161,0.546832552623011,-2.8762973  
5069182,0.00402370469474668,0.0168646161088071,-6.42123156118956  
"Il9r",84.9299189134189,-1.76304009625573,0.641212366188535,-2.7495416  
327285,0.00596786810893631,0.0227401783052648,-6.67067720630591  
"Pus10",915.088144883274,-0.345479758981293,0.245642851705964,-1.40643  
115230902,0.159596135180034,0.28082352168038,-0.438769258810641  
"Rhbd1",3951.04858072352,0.0773701775437383,0.241832126836778,0.31993  
3412304472,0.749018808629658,0.836582999401546,0.0138051252847948  
"Pex13",2295.67429677125,-0.552956085599968,0.452629258741229,-1.22165  
342810085,0.221838714964972,0.357719110422667,-0.568442841872948  
"Cfap410",1300.09236608562,0.510478414900898,0.120840129426038,4.22441  
135511482,2.39566122911914e-05,0.000330794246877897,4.09098115682623  
"1700093K21Rik",13.540317254264,1.16551728287463,0.55948203649109,2.08  
320769364539,0.0372322961336899,0.0927619869683983,2.77127182641355  
"Mpg",1008.8166605056,0.37829449663052,0.123713788114675,3.05782000854  
962,0.00222953447704036,0.0108704111887052,1.71053829235119  
"Ahsa2",2209.79756088279,0.128715419717951,0.151647409132773,0.8487808  
69083335,0.396003237325704,0.540364694616599,0.0792257576039236  
"Nprl3",1211.25737401971,0.158985428989918,0.132868096062808,1.1965658

7022037,0.231475809922075,0.368446451693814,0.158740574286768  
"Xpo1",4614.71346882998,-0.0592083893357016,0.114047515381296,-0.51915  
5451460293,0.603652341982962,0.724800090992299,-0.0190567765903022  
"Hbq1a",1.0140565730765,1.36805835846127,1.92625786124179,0.7102155874  
28846,0.477570456213082,NA,NA  
"Nsg2",122.770331588853,0.425999574513445,0.427118543903224,0.99738019  
0100026,0.318580003203029,0.463661484097384,0.327423508612414  
"4930524B15Rik",1.06208007786409,2.24749965058903,1.67708480521561,1.3  
4012283910716,0.180205411979967,NA,NA  
"Cpeb4",4203.55954909745,0.412291005839948,0.225799456227428,1.8259167  
3482456,0.0678628050218498,0.146576151260015,0.791685387259298  
"Stc2",1028.06264281888,-0.801681417151198,0.431299921931421,-1.858756  
23060898,0.0630616990901514,0.138590735894925,-1.58430689511182  
"Asb3",482.268901111598,-0.393503306930416,0.21301297449218,-1.8473208  
3981514,0.0647006543523074,0.141284954481049,-0.770076714189623  
"Cdc34",2458.06689275396,-0.021247908566072,0.302411083474727,-0.07026  
16726937778,0.94398538784263,0.965526259883314,-0.000745418687664363  
"Tpgs1",1545.27211406459,0.465731598295793,0.163771267616219,2.8437930  
845549,0.00445799880721749,0.0181773578262783,1.86645595634694  
"Chac2",1146.56239537464,1.31128615760575,0.25403919578785,5.161747397  
04662,2.44655282529604e-07,9.08626418811851e-06,15.2223888740789  
"Madcam1",21.027778143611,-1.32544435734742,0.634409077292127,-2.08925  
818496303,0.036684488287611,0.0917370979391868,-3.16625915506559  
"Erlec1",1876.38783389148,0.276944816673621,0.187090339439193,1.480273  
20653631,0.138800350611738,0.252573890455219,0.381090313122351  
"Shc2",198.165317931405,-1.51428129824471,0.254488152894758,-5.9503017  
3711438,2.67648606138617e-09,3.09850777959792e-07,-22.6947988414285  
"Sptbn1",20953.9915082458,0.031375857715637,0.0913570659319232,0.34344  
2046825556,0.731265932137199,0.823936616284953,0.00607630112888533  
"Theg",0.626665662477643,3.36054900158077,2.43572739091944,1.379690113  
97135,0.167682078079119,NA,NA  
"Wdpcp",425.262535391902,0.419941298621542,0.128988167264136,3.2556575  
3455203,0.00113130117062041,0.00646296812914058,2.1172040208977  
"Mdh1",37443.8622319938,0.798804609883023,0.435029421171175,1.83620824  
479527,0.0663268637641779,0.143965400164081,1.54822894398413  
"Prss57",7.1228618614429,-1.2466541857002,0.751593639932068,-1.6586811  
2696227,0.0971800644048751,0.193010489645314,-2.05075952586465  
"Fstl3",420.656209517659,-0.924677855479482,0.298849580219707,-3.09412  
465896616,0.00197394527186037,0.00989662764482733,-4.26790725241741  
"Ccng1",6296.30989732737,0.144330684634195,0.264342294550028,0.5459992  
12422212,0.585066478584358,0.708963498163417,0.0496427175638693  
"Fgf22",0.546878087091903,-0.767355092244241,3.80167138707703,-0.20184  
6770568519,0.840036516368224,NA,NA  
"Nudcd2",1285.76632805021,0.0539827811768811,0.18989544052463,0.284276  
34190553,0.776198614983593,0.855191308976103,0.00844453087993158  
"Polrmt",2016.85737121319,1.04511724813848,0.269688202696905,3.8752798  
1456816,0.000106502245379801,0.00104089262176208,7.17752731506626  
"Hmnr",126.393658439561,-0.256751145645135,0.443959159932878,-0.578321  
54129662,0.563047053615289,0.691036714169779,-0.0948855502506717  
"Hcn2",65.1042639572134,0.71251659604527,0.255525758948517,2.788433537



88385,0.00529636135830057,0.0208016907922234,2.75937798969042  
"Meikin",0.196458446039387,0,4.78471990595362,0,1,NA,NA  
"Acsl6",21.4076154427661,0.25350182375409,0.494026786863509,0.51313376  
2166076,0.607857755992365,0.728079245275253,0.0804476334288939  
"Slc22a4",1376.10402420662,1.19673809695878,0.325109293694205,3.681033  
17921271,0.000232290771651677,0.00190374468622807,7.49628659367401  
"Zfp354b",119.554377362354,0.221759915034666,0.244648248787306,0.90644  
3909302047,0.364700940717166,0.509702954568364,0.149450030843705  
"Cyfip2",4582.12976550677,1.00914800436748,0.366930143209834,2.7502455  
7955269,0.00595506159196449,0.0227002523793008,3.82000790231403  
"Mgat1",6243.30624108864,0.346224644715872,0.133352251099191,2.5963164  
615672,0.00942292331109653,0.0323313009777889,1.18814584646812  
"Ppp2ca",9052.67324591413,-0.318659814149202,0.246014453454965,-1.2952  
8899491076,0.195220554163595,0.325807900162954,-0.357360199222743  
"Sgcd",87.3932528718214,-2.19552919353983,0.75082111372948,-2.92417082  
230705,0.00345375156541183,0.0150617866299262,-9.21155005426781  
"Flt4",587.65947433626,-0.680026478728713,0.17123461313198,-3.97131436  
390479,7.14771859543717e-05,0.000763232295585071,-4.88119478638203  
"Hnrnpab",11982.7350216751,-0.3149921214772,0.1932071321448,-1.6303338  
1832472,0.10303096378263,0.201838413727893,-0.504078059723105  
"Phykp1",728.891724909755,0.569845791706482,0.134858411105884,4.225511  
68320579,2.38398455200783e-05,0.000329603900453367,4.56880640454387  
"Hspa4",7399.58990542058,-0.152864031643592,0.171689957434688,-0.89034  
9289659192,0.373278362466845,0.518462851644006,-0.100414379821391  
"Cnot6",3832.18639039071,0.010615532966655,0.121461738724387,0.0873981  
64048541,0.93035502867315,0.956679177759194,0.000470132031869872  
"Gfpt2",232.747268020601,-2.14510678572808,0.388646487277868,-5.519429  
23954542,3.40102508917002e-08,1.9992397084915e-06,-28.1496863339316  
"Zfp354a",460.636834520311,0.558942661716722,0.27880636954275,2.004770  
05827881,0.044987634889668,0.107141676447874,1.24845614096031  
"Mapk9",2349.61426504783,-0.052834687256957,0.12242092963547,-0.431582  
143790949,0.666045138642327,0.773745716947575,-0.0135527307928767  
"Canx",19151.9577265094,0.0165241834952032,0.218648023846644,0.0755743  
555532567,0.939757739405451,0.962574372938369,0.000630297550047867  
"Rack1",20786.8944775031,0.0538801678787383,0.138165876629827,0.389967  
256698943,0.696560759292365,0.797506851713595,0.0121911882576744  
"Rasgef1c",12.4267819809443,-1.7866702821147,0.549694192032332,-3.2502  
9863515388,0.00115283878256031,0.00655336751672329,-8.98297838734376  
"Rufy1",2208.66092191033,0.432253763635629,0.0950217581213758,4.548997  
74726848,5.39020200302292e-06,0.000105197868167418,3.95930076022325  
"Rnf130",3177.41302764752,0.116878148930489,0.280325083947426,0.416937  
889698122,0.676723838454524,0.782282646717632,0.0286981628526666  
"Ltc4s",678.405370031987,-0.860770990640271,0.51678208596812,-1.665636  
2788345,0.0957858807015411,0.19092548578191,-1.4253266281669  
"Rad50",998.842010538382,0.0358622503611175,0.176871171247606,0.202759  
161417624,0.839323279320831,0.897124821651609,0.00389321565487742  
"Mrnip",600.946373816372,1.10726014774289,0.253323128369498,4.37093981  
457484,1.23712892684644e-05,0.000200345015080165,9.42884012988633  
"Il13",0.718952545052701,-1.9738870190167,4.28078811078874,-0.46110364  
9125257,0.644724243801788,NA,NA

"Clk4",5970.43989652589,0.297387703337673,0.178468183302295,1.66633456  
919292,0.095646795046111,0.190751163624039,0.492707637319475  
"Sar1b",3634.71728030476,0.521633092418556,0.262642334820539,1.9860967  
6834842,0.0470225800510984,0.111025219888147,1.14654844028645  
"Jade2",1561.6767520819,-0.123969836914677,0.155521847390199,-0.797121  
684155671,0.425380363913843,0.568359236318242,-0.0700431564405642  
"Pdlim4",701.870805213852,-1.45166452794428,0.315275397722808,-4.60443  
326193372,4.13590619707621e-06,8.57892542878638e-05,-13.5928303628595  
"Cdkl3",239.657842197616,-0.145491368576532,0.191769135209427,-0.75867  
9797025962,0.448044125151893,0.588756190336407,-0.0770730514260457  
"Ube2b",5586.33022804592,-0.138768929792622,0.168542487507374,-0.82334  
6871432348,0.410310766377861,0.553803082018243,-0.0820049582842357  
"Cdkn2aipnl",1119.91643138913,-0.467541356577911,0.14355285325975,-3.2  
5692834354135,0.00112624860368975,0.00644543448040588,-2.3584577790615  
1  
"Kremen1",1721.901990485,-0.667304424246251,0.129460757686229,-5.15449  
187979866,2.54319580243411e-07,9.30842440287515e-06,-7.73044863924873  
"Itk",251.210652490032,-1.05433044832537,0.433016378448957,-2.43485119  
916695,0.0148979147457661,0.0459765023287349,-3.24694222973961  
"Nefh",38.279196724003,-1.04359368512093,0.569859402219074,-1.83131783  
218299,0.0670531175484215,0.145202319631177,-2.01374676191187  
"Med7",1246.62869562708,0.376785069620294,0.128666788821344,2.92837858  
993642,0.00340734875945169,0.0148996541937024,1.58491522572863  
"Havcr2",245.756833888351,-1.17635232067942,0.451059472220951,-2.60797  
609434347,0.00910793148909543,0.031453497728371,-4.06929098529279  
"Tnip1",1530.59377365148,-0.736273094738016,0.164657873399793,-4.47153  
2879271,7.76609167232784e-06,0.000139344045066026,-6.537048189665  
"Fam71b",14.73695289779,0.014333742186445,0.770616555630724,0.01860035  
58860909,0.985159918929802,0.99044282248599,0.000137648938958968  
"Vdac1",24849.0496143184,0.953751012095,0.236939099400452,4.0253002333  
0198,5.69026688440479e-05,0.00063947448825432,7.01470882264706  
"Fabp6",2.94710416388412,-2.26170929316465,1.3031506236549,-1.73557012  
682181,0.0826398718621689,0.17043708711324,-4.00184363700575  
"Upp1",456.759730851735,0.344985612551334,0.1999093383914,1.7257103411  
342,0.084399536689503,0.173259861694244,0.604746918006564  
"Slu7",2864.81364972676,0.197752572416528,0.207869757983965,0.95132920  
8897152,0.34143728394677,0.485937530101761,0.142713127689951  
"Nipal4",214.438162232941,-3.19718336153655,0.812684935061119,-3.93409  
945675455,8.3509201562985e-05,0.000858788192022722,-22.5720769381933  
"Ascc2",3051.51098626249,0.0509924430509317,0.136289941104914,0.374146  
783229427,0.70829511410649,0.806418509783654,0.0109711479487699  
"Hus1",1182.21072936501,0.722176614057027,0.195367390760243,3.69650539  
553599,0.000218587615757173,0.00181671838535096,4.55745692253263  
"Pttg1",2771.48290657315,0.347154709666643,0.182329310424251,1.9039983  
6898889,0.0569103966010517,0.12841556682413,0.71252936843255  
"Hormad2",3.80163450152568,-1.69332456517353,1.07601055428721,-1.57370  
627864822,0.11555369628302,0.219943244534619,-2.56434658366559  
"Zfp607a",145.278469305046,-0.189192453506426,0.203582023108212,-0.929  
318073462029,0.352724271475393,0.497750441139699,-0.131991335436687  
"Tns3",8574.06674047697,-0.580951608282841,0.276172480486507,-2.103582

5410969,0.0354148782232375,0.0892374380455782,-1.40384319691257  
"Btg2",3344.87391702263,-0.757824086341113,0.174684879387821,-4.338235  
16378114,1.43631424831639e-05,0.000224581036196255,-6.36668775745872  
"Castor1",377.032150698665,0.0707456198841567,0.218764152087203,0.3233  
87626396653,0.746401699250162,0.835055102821876,0.0127524331680252  
"Igfbp3",7395.05948598346,0.238662355179668,0.18029537685144,1.3237297  
5584571,0.185592812426546,0.314070691728827,0.276403748316911  
"Igfbp1",203.372333800954,1.04565685328451,0.598757106738306,1.7463790  
2668189,0.0807451119186826,0.167485977892604,1.86843785133308  
"Pes1",2573.09683733017,-0.10990221131527,0.143691753320368,-0.7648470  
33846383,0.444362636747393,0.585576013199558,-0.0588151880844916  
"Adcy1",869.414835345106,0.189499507541096,0.515349859944625,0.3677104  
08539662,0.713089178616568,0.809726446023286,0.0399955404274262  
"Tcn2",29893.3940341809,1.69375209260453,0.41289597665964,4.1021278683  
9706,4.09367922431251e-05,0.000497002226124815,12.8842299826179  
"4921536K21Rik",55.7153435461468,0.720513917031088,0.247105216150797,2  
.91581832328215,0.00354757009968887,0.01535977282463,3.00886852507234  
"Osbp2",605.560453841452,1.85085866080087,0.578927727758776,3.19704614  
592596,0.00138842712840746,0.00757670085353728,9.03714578639228  
"Gabrg2",0.221621608581856,-0.722128730926801,4.78471990595555,-0.1509  
2392974309,0.880035723499026,NA,NA  
"Myo1g",1174.42076710651,-1.15613748340271,0.417935900071302,-2.766303  
35705898,0.00566957667105373,0.0218296615189979,-4.42163117291146  
"Smtn",5124.39790893426,-0.0829791542366364,0.144864270538177,-0.57280  
6213211615,0.566775911732116,0.694027301824581,-0.0303076365043074  
"Arf5",5341.30031104442,0.191724648533198,0.121744324497031,1.57481385  
128449,0.115299418266771,0.219627594506204,0.290620424697202  
"2310033P09Rik",1517.17486760224,0.579934591025026,0.250859627015315,2  
.3117892581002,0.0207892996728667,0.0591837881474018,1.63953750339332  
"Guk1",2251.06471573548,0.544674587888803,0.20987721943948,2.595205851  
03742,0.00945342817435172,0.0323941902536924,1.86811193034448  
"Npc1l1",10.6328576173728,0.119837006738416,0.540030437128902,0.221907  
874999668,0.824385600001991,0.887529718683341,0.0142981454229275  
"Rnf185",1678.97114236855,0.119081767981686,0.211622926484638,0.562707  
311347621,0.573634204812816,0.699642597594282,0.0425342986034426  
"Limk2",3491.96201444928,-0.35386980738363,0.291323101038608,-1.214698  
75242311,0.224481008549452,0.36071622751749,-0.360828198221162  
"Patz1",1460.11773014291,0.0755824116663545,0.195973195498252,0.385677  
293643093,0.699735681271429,0.799940154769115,0.01687138202621  
"Eif4enif1",1761.32383118637,-0.116940961095264,0.171441421684084,-0.6  
82104475957696,0.495172890559952,0.631161732374841,-0.0538154278554591  
"Trim11",2627.40995510168,0.206563856920173,0.148218417869646,1.393644  
99965071,0.163424832584551,0.285806849497834,0.258708640254667  
"Ogdh",18142.0540033061,0.213423678935882,0.369690107555109,0.57730427  
3428705,0.563733927356361,0.691715746616738,0.0786637376866284  
"Drg1",2722.37156028321,0.277387618623169,0.194468861768724,1.42638577  
765246,0.15375701673398,0.273236813003932,0.359887249139985  
"Rtn4",9987.45472975587,-1.48223486953485,0.38044296689001,-3.89607641  
232432,9.77635563946244e-05,0.000972051923805398,-10.2809312579241  
"Mtif2",1998.26353348917,0.117957393419727,0.169901432142546,0.6942695

65195672,0.487513173653719,0.624255064024445,0.0555810799860848  
"Rps27a",16698.1914298251,-0.116101958197338,0.23981940806042,-0.48412  
2445036171,0.628298973012076,0.744534664871123,-0.0342495977798673  
"Clhc1",18.005823841748,0.804571592560105,0.646157828015433,1.24516264  
862288,0.213071969283213,0.347480533379398,0.850469694209222  
"Cfap36",2005.85046459105,0.603718249830849,0.131384008616876,4.595066  
44824126,4.32611387449983e-06,8.86967069663489e-05,5.63286501792994  
"Ppp4r3b",2404.87142057862,-0.155959125557672,0.134919858824851,-1.155  
93899160637,0.247706112314985,0.387060076347524,-0.148032559452186  
"Pnpt1",1447.13490349401,-0.154129981843494,0.16162364950495,-0.953635  
079492333,0.340268392506169,0.484911059573548,-0.11155770675715  
"Efemp1",1678.33635372548,-0.0293131011398528,0.161633436320198,-0.181  
355428723195,0.856088601427122,0.908458449473496,-0.00281423732542103  
"Myl7",90.6267291642728,-0.781737669612299,0.614841433616634,-1.271445  
98081809,0.203570033505326,0.335868172967103,-0.852904360963439  
"Pol d2",651.496252197446,0.0458784191325509,0.188032180943814,0.243992  
378869763,0.807236722360779,0.877194538961738,0.00601128813354464  
"Zkscan17",1293.36748688715,-0.1543117532331,0.121599095730336,-1.2690  
2056554194,0.204433729242028,0.336966323704451,-0.167856048151842  
"Aebp1",7478.04339828366,-1.12252528832331,0.350779445111142,-3.200088  
55697816,0.00137385368036286,0.00751188980923027,-5.49057225300091  
"Polm",939.061963645403,-0.114773045392781,0.153144578416811,-0.749442  
432629939,0.45359058377178,0.59400290163088,-0.0597819595038825  
"Pgam2",1596.97948680565,2.19996443412981,0.840487761499463,2.61748538  
753853,0.00885802808295833,0.0307977588376465,7.65656560428243  
"Dbnl",2911.61366794914,-0.654913263783848,0.140653590173536,-4.656214  
34174434,3.22076627969421e-06,7.00876126355779e-05,-6.26474604237001  
"Mrps24",2284.87820806599,0.594426609471931,0.1929638627619,3.08050741  
192613,0.00206648211263951,0.0102394582547002,2.72336941405392  
"Ankrd36",0.126027965541212,-0.799378235893475,4.77967760337759,-0.167  
245220750577,0.867177104442843,NA,NA  
"Ccdc117",1768.282714187,-0.0240562406004811,0.135405988417241,-0.1776  
60093779265,0.858989927145236,0.910744187029789,-0.00224909553274298  
"Dynll2",11910.4307000977,0.301925451945107,0.267187299511833,1.130014  
2353201,0.25847022617574,0.399560173628365,0.276983662928971  
"Xbp1",7177.14174069704,-0.401696141039593,0.142401535228759,-2.820869  
45477304,0.00478936885038273,0.0192106796636006,-1.58761920828478  
"Supt4a",1926.86083582726,0.397802111990725,0.156130129493788,2.547888  
18327697,0.0108377202508787,0.0360831084286402,1.32147094241674  
"Sept4",3124.3942036218,-0.418039234092276,0.232249470660883,-1.799957  
74760095,0.0718673101467478,0.153060492981026,-0.784627059063204  
"Btlnl10",6.87023236957242,2.48445767968673,1.06031534525684,2.34313092  
873792,0.0191226711834229,0.0555172487692644,7.18271999054161  
"2810021J22Rik",358.575717491724,0.13392496964023,0.183766338439064,0.  
728778571624195,0.466137121349049,0.604907926260484,0.0673212725635639  
"Ska2",638.839575419046,-0.0395531960191525,0.147359578073739,-0.26841  
2793631644,0.788381592823691,0.863526862140962,-0.00580365126714854  
"Prr11",116.058773971195,-0.687524626148734,0.289282331893066,-2.37665  
612569412,0.0174703663640491,0.0518315890697245,-2.03490478536864  
"Smg8",452.184319137805,0.050783644771757,0.189446080318608,0.26806384

5323956,0.788650174896922,0.863639489477124,0.00744487494995042  
"Rnf187",7335.59388695481,0.20069669095106,0.186585317459189,1.0756296  
0303647,0.282092942530018,0.426012562423537,0.171251765722208  
"Tubd1",237.214881071805,0.208209940059436,0.231645194740073,0.8988312  
50495251,0.36874255179393,0.513773208151926,0.13866226923874  
"Mrpl22",1085.54826736537,0.449208763813657,0.202494830321384,2.218371  
51645159,0.0265295115765566,0.0717636538179384,1.18338530087376  
"Cnot8",2086.54602697244,-0.0318672558422,0.112239375138584,-0.2839222  
49236089,0.77646996541616,0.855393603349584,-0.00497746017506883  
"Rps6kb1",2684.60607963916,0.0142159245623358,0.187508819397481,0.0758  
14698252677,0.939566522266904,0.962511041050371,0.00054318680505352  
"Sap30l",1188.48987813785,0.713864462724884,0.140447166904473,5.082797  
17176799,3.71916786369156e-07,1.26335078408115e-05,8.05179000953688  
"Galnt10",1438.62793333485,-0.838666744379512,0.225988690967547,-3.711  
10050148459,0.000206360147369638,0.00173506259310617,-5.33116278147209  
"Rnft1",1900.74111515744,0.0104017761114094,0.17108979962243,0.0607971  
727967686,0.95152074193947,0.969930765084564,0.000317572322551895  
"Mfap3",1835.406331846,-0.188616930011127,0.160011563681922,-1.1787706  
1926641,0.238489526591279,0.376663950077401,-0.184165922828291  
"Fam114a2",3851.62113747408,0.343098387472194,0.141351055122048,2.4272  
7857373225,0.0152125698857621,0.0466448636000297,1.05166259127437  
"Gria1",7.20375087209566,0.159900373114898,0.798963939490048,0.2001346  
559107,0.841375270120034,0.898419223263988,0.0171282846900607  
"Ppm1d",787.133978591618,0.0673693035381985,0.131423065233117,0.512614  
002866998,0.608221356096026,0.728311736237813,0.0213578284579882  
"Znhit3",381.836905642397,-0.078204327366283,0.14360199559255,-0.54459  
0811872676,0.586034975445225,0.709677035664306,-0.0268198058672307  
"Myo19",1772.07054052638,0.946397610002851,0.217277579982617,4.3557076  
1639818,1.32637728795973e-05,0.000211526275052137,8.00762286554719  
"Prpsap2",1202.02419083221,-0.028457288402955,0.0951962740368927,-0.29  
8932796381574,0.764991322706281,0.847825885870919,-0.00469772881490708  
"Ggnbp2",7899.18765802793,0.75480058762205,0.276171007810198,2.7330913  
3209521,0.00627429313318323,0.0236652486969609,2.82578289338299  
"Acaca",16340.7668841392,-3.64821073359534,1.07500743169224,-3.3936609  
4228059,0.000689650209139534,0.00441312759363395,-19.7848729725291  
"Shmt1",1611.46547464616,1.3533380948858,0.298128866509114,4.539439976  
85454,5.64038332517667e-06,0.00010856485101115,12.353490532549  
"Llgl1",1594.64205968479,-0.3321078226851,0.12228376052046,-2.71587839  
032424,0.00661001930567766,0.0246381488094252,-1.22994779543503  
"Drg2",2043.21185810819,0.246486663766685,0.0988234281616834,2.4942128  
4357199,0.0126236822525625,0.0404231493776424,0.790816141802995  
"Srebfl",4958.33935248983,-1.86764875174758,0.497826340968248,-3.75160  
693207816,0.000175704783726718,0.00153009909473137,-12.1068888094018  
"Tom1l1",767.766061313979,0.238975625694926,0.164303263875948,1.454478  
8707019,0.145813587325437,0.262324536415517,0.319790694870439  
"Myocd",21.3127702935378,-2.10087325397044,0.806027501064569,-2.606453  
56541271,0.00914852274307995,0.0315679537233973,-7.25980449843158  
"Cox11",772.408147225665,0.394482828172435,0.215246082602767,1.8327061  
9099,0.0668462761216511,0.144834836295139,0.762204432735072  
"Lrrc72",1.47299175281349,-0.0804231793532443,1.90983030864562,-0.0421

101178409286,0.966410914456024,0.979592747792798,-0.00165819383622487  
"Stxbp4",930.706423907363,0.873208462056095,0.226930982970967,3.847903  
22865614,0.000119133091093103,0.00114081192133737,5.91687368799579  
"Bzw2",2856.18831643379,0.209114127161893,0.0974462971670773,2.1459422  
5990295,0.0318775856384374,0.0823571173682593,0.522093233333706  
"1700086D15Rik",0.175348947559291,-0.0714235131930082,4.78471990596623  
, -0.0149274178210406,0.988090086099572,NA,NA  
"Elac2",1193.81787795006,-0.26422488530388,0.220270177075728,-1.199549  
06656765,0.230314517797778,0.367094945477076,-0.264788941323654  
"Pctp",1524.32972059829,0.900066618427438,0.275552241523071,3.26641007  
691486,0.00108920394569143,0.00628136602575909,4.56348878852349  
"Twistnb",1353.23851953588,0.340137117573597,0.175045553737545,1.94313  
48601038,0.0519998660406993,0.119845554144392,0.721618382727005  
"Efcab10",4.46777041601293,2.4301461531467,0.908505816426614,2.6748823  
2789206,0.0074755483776047,0.0270825422271528,8.77007172248317  
"Atxn7l1",956.07602979757,-0.367582071196903,0.124322401186136,-2.9566  
8413487734,0.00310966495034475,0.0138937321727364,-1.57189763027973  
"Atp6v1c2",1194.06699401881,1.63802905031641,0.575018879512004,2.84865  
264199071,0.00439047866267999,0.0179730323252014,6.58304685594231  
"Syp1",7095.77485915414,-0.00711525585607174,0.306680857661062,-0.0232  
008476509981,0.981490062462759,0.988128942938962,-8.49709596507308e-05  
"Pdla6",9459.38113737838,-0.448807304204212,0.198459977397513,-2.26144  
994113979,0.0237314091982097,0.0656612766491688,-1.22221266173047  
"Nampt",5140.50690144407,0.0898865770119644,0.298897873603751,0.300726  
719558825,0.763622892122213,0.84679060175163,0.0149483029981517  
"Pik3cg",319.072987933499,-1.18468539397376,0.386701490055302,-3.06356  
562992383,0.00218716224537932,0.0107122053404687,-5.37417305955724  
"Nbas",928.8518781729,-0.147957432231559,0.166453066422829,-0.88888378  
815271,0.374065539069971,0.519244233824454,-0.0969684782199926  
"Tspan13",1967.82195861501,-0.736049370943174,0.278391003001997,-2.643  
94094279654,0.0081946952596553,0.0289929537602539,-2.60613181271452  
"Rock2",4829.24781306165,-0.233189228214394,0.182018333427196,-1.28113  
044342132,0.200147852349589,0.331646369092571,-0.257367693778608  
"Agr2",4.03442510853462,-1.33803513861762,1.03723794974182,-1.28999824  
866673,0.197051266170963,0.328160709583314,-1.49090809157493  
"Matn3",1.91734620953509,-1.12162102213809,1.14204784856771,-0.9821138  
61117786,0.326043757502908,0.470938675738329,-0.844611354877815  
"Laptm4a",18580.0042660628,-0.402566848894128,0.139461269654965,-2.886  
58528557857,0.00389447182938559,0.016460960704392,-1.65324692968548  
"Fam49a",736.612589825166,-1.59975449242993,0.270978884992743,-5.90361  
308953197,3.55625646505093e-09,3.74810208408449e-07,-23.6713209422883  
"Snx13",2280.05639666035,0.0165829847268466,0.182969770141768,0.090632  
3744845817,0.927784706668177,0.955572669727754,0.000753604853375875  
"Ntsr2",20.9138952384062,-2.78452672705508,1.48009875004194,-1.8813114  
5099351,0.0599295642343396,0.133466252487735,-5.60777681879743  
"Sdc1",3069.24212732494,-1.62231348244606,0.413418019112821,-3.9241479  
7479674,8.70372271652679e-05,0.000887579422211502,-11.4000172024852  
"Lpin1",5321.5488869075,-0.753763870068822,0.604364607629264,-1.247200  
54840009,0.212323971891952,0.346637595574754,-0.798594306352175  
"Pum2",7158.50661714907,0.0404823514461201,0.0775187034784066,0.522226

890151701,0.601512365597537,0.723209477981179,0.0131185636309597  
"Nrcam",74.8529561893011,-0.641274148070404,0.440936123586156,-1.45434  
704431764,0.145850113748155,0.262364560506072,-0.858037821622274  
"Rgs9",97.0684875394944,-0.297863681967346,0.442495166085397,-0.673145  
617843565,0.500854654645047,0.636075298395696,-0.13476494652303  
"Slc7a15",14.595874551148,-1.33445603245944,0.811389324819317,-1.64465  
564389401,0.100040844868832,0.197408804093967,-2.16512629219182  
"Trib2",2521.41786935652,0.602134313665364,0.210575684492846,2.8594674  
4096098,0.00424352976962629,0.0175408826474822,2.43456208456732  
"Arsg",1387.57940793658,1.39360664343684,0.382254451825025,3.645756476  
56487,0.000266606361253483,0.00211398569813762,8.58347438473221  
"Hs1bp3",1048.69928565202,-0.133211700368178,0.090474171578812,-1.4723  
7270088887,0.140920260848424,0.255501510695793,-0.18177095609385  
"Lratd1",554.495992664383,-0.558897423811611,0.413057594630045,-1.3530  
7383541074,0.176032043451841,0.302385494236688,-0.668470719466023  
"Smc6",2978.53836890437,0.304357473865322,0.220947509411501,1.37751031  
761338,0.168354527088284,0.292278209346217,0.374374654635309  
"Apob",2288.02858171508,2.09849916664538,0.794638819530009,2.640821358  
16941,0.00827053156501203,0.029192401240877,7.41577463840652  
"Amz2",2235.63947765854,0.231306165788069,0.159479647093675,1.45038047  
176142,0.146952449696557,0.263716416399766,0.308303578176411  
"Gna13",3045.22271185317,0.0546328565673813,0.173580569447412,0.314740  
622993133,0.752958597902951,0.839500614244724,0.00955791285796792  
"Prkar1a",12931.6771403279,-0.261033622909948,0.106464700218989,-2.451  
83260153858,0.014213076559451,0.0444683194409783,-0.812591994819618  
"Fam20a",471.297333247398,-0.741759602643468,0.215610541922804,-3.4402  
7521116775,0.000581122942296623,0.00386714509518756,-4.12065168458372  
"1700012B07Rik",1.16605875541074,-3.24647281364455,2.13689625691911,-1  
.51924680626526,0.128700383655805,NA,NA  
"Abca8b",273.145680202547,-0.673818269687371,0.259941255911957,-2.5921  
9440686089,0.0095365864450244,0.0326103757462444,-2.3065640073049  
"Rdh14",1212.53485622148,0.594521577846067,0.229996066734554,2.5849206  
3054376,0.00974014161517478,0.0330986372479555,2.02628599647486  
"Map2k6",516.828121759291,1.01923906798285,0.187971211199182,5.4223147  
3362602,5.88321772727053e-08,3.08362847436346e-06,12.9335358763782  
"Klhl29",147.088761741192,-0.610383933836516,0.206124809997859,-2.9612  
3467060008,0.00306408375669276,0.0137436174575559,-2.61682624975271  
"Trappc12",1592.89084977018,-0.0701926259961506,0.097889796263214,-0.7  
17057637012656,0.473338533565019,0.611080893031235,-0.0345716886848048  
"Adi1",2161.64624529378,0.564484984857241,0.218719916822642,2.58085771  
546346,0.0098555192238673,0.0333848008733434,1.91905394505681  
"Rnaseh1",636.206823668504,-0.133191432896109,0.1224021701133,-1.08814  
60089541,0.276530655250158,0.420104643957148,-0.115510462835107  
"Dcdc2c",76.3462227669618,-0.0482639282283996,0.295714561812146,-0.163  
21119911254,0.870352148824007,0.918545396361054,-0.00410069403761386  
"Ubxn2a",1522.74157857095,0.280745175718919,0.228829489495937,1.226874  
98161772,0.219869583118413,0.355650998145247,0.290235870615946  
"Fkbp1b",96.5017730361861,-0.671188914349372,0.413187501069515,-1.6244  
1727451105,0.10428678275852,0.203745860744051,-1.0677822566815  
"Allc",0.850686718700135,-3.65018339540816,4.72365323903982,-0.7727458

41129976,0.439672811249954,NA,NA  
"Cmpk2",1104.63611985623,-0.398635146676875,0.220018291184691,-1.81182  
730095039,0.0700128852929956,0.150094693506633,-0.756007128439285  
"Pfn4",41.1703619678548,0.79039118652973,0.42327283176385,1.8673326687  
093,0.0618551460139199,0.136647590865557,1.57315509552207  
"Itsn2",4596.57571377839,0.365588152892363,0.207753954037626,1.7597169  
4298608,0.0784558116182812,0.163782806738035,0.661427232978102  
"Rsad2",2838.10675153258,0.108533783068733,0.251290229604909,0.4319061  
00127233,0.665809661018692,0.773579226723292,0.0278635729237011  
"Rnf144a",1130.95849946846,-1.21997519093326,0.303412017930674,-4.0208  
5322543817,5.79877282455756e-05,0.000649136580996668,-8.9544561510691  
"Id2",9455.13977271081,0.646856218001134,0.241772745293395,2.675472031  
45732,0.00746240993813593,0.0270500221181956,2.33519458132475  
"Mboat2",597.072750778937,-0.352661034430782,0.266612549794843,-1.3227  
4731516634,0.185919422992483,0.314483986250319,-0.407966086288978  
"Ncoa1",2086.36221065317,0.308299340595614,0.175463016609892,1.7570616  
6776477,0.0789072985268809,0.164541727190586,0.556354240073504  
"Dus4l",308.073785007804,-0.0781222721104075,0.293998774038635,-0.2657  
23122029554,0.790452454574797,0.865030137469798,-0.0113270210160313  
"Rrm2",354.474491398142,-0.733777818125154,0.381118048381706,-1.925329  
49106163,0.054188150415337,0.123574334128449,-1.53426514478259  
"Bcap29",921.901215554454,-0.179272082319036,0.177059257043447,-1.0124  
9765368125,0.311300167982988,0.456421067407232,-0.140610175785879  
"Slc26a4",2107.52885361095,1.93548296185006,0.746034192522507,2.594362  
27085753,0.00947665740923169,0.0324566777033549,6.63454347584148  
"Cenpo",305.048676162425,-0.335020739803886,0.12232190973315,-2.738844  
90958935,0.00616554506271298,0.0233564790427002,-1.25863300450078  
"Klf11",1271.3112677099,-0.216533075626046,0.224971724910878,-0.962490  
178318301,0.335803434495176,0.480377715850604,-0.158758278286684  
"Adcy3",966.498075238901,-2.40345223859907,0.562154988844618,-4.275426  
32600098,1.90771881216337e-05,0.00027862697677574,-19.6737867825468  
"Grhl1",281.273934051776,-2.09942832871713,0.499245500244307,-4.205202  
30565879,2.60848724950329e-05,0.000351002652800656,-16.7003577479052  
"Dnaja2",375.691909450223,-0.438617801869962,0.133186107136229,-3.293  
26993108465,0.000990293510596253,0.00582993444130608,-2.25657872727523  
"Efr3b",349.23479765767,-1.10691662285316,0.252592787580795,-4.3822178  
5132762,1.17477252345481e-05,0.00019280904597914,-9.46835476321198  
"Cbl1",624.833662996809,-0.333788930789543,0.181015115132932,-1.84398  
374988973,0.0651855084390426,0.142073221947737,-0.65135996091925  
"Pomc",46.5156466456356,0.0625524651896632,0.294634328399448,0.2123054  
21196061,0.831868766331639,0.892654640167043,0.00710317733930712  
"Dnmt3a",3673.00986583646,-0.169673453313886,0.175898272790038,-0.9646  
11252984946,0.33473956096462,0.479414717179974,-0.124742100292914  
"Dld",11373.9302722341,-0.089994264479396,0.425491041141347,-0.2115068  
37460063,0.832491797375346,0.892796054409795,-0.0102050892123431  
"Kif3c",682.821705396795,-0.512884754714282,0.167916743966433,-3.05439  
911827263,0.00225511844728829,0.0109678971028254,-2.31453745757805  
"Sh3yl1",1150.61195439846,0.863168315544006,0.22463101302302,3.8426052  
748805,0.000121735169686728,0.00115935691974418,5.83492269807478  
"Rab10",6239.68085039997,-0.219687045067588,0.152558087303564,-1.44002



228233531,0.149861095053035,0.267802367458902,-0.289439001177429  
"Sntg2",142.568953764378,-0.193170877918814,0.283786989467416,-0.68068  
9690113485,0.496067861333125,0.63193069125005,-0.0886607112102685  
"Tpo",4.51983990758056,0.459397065876641,0.990187485462673,0.463949577  
85392,0.642683871270203,0.755968588474202,0.12851883441044  
"Pxdn",3481.65183057065,-1.29418187816452,0.21792231506818,-5.93873040  
381209,2.87237760543657e-09,3.21189920567974e-07,-19.3496151101313  
"Ccl11",156.527260685501,-2.98509050490493,0.756074027753598,-3.948145  
81023773,7.87588320438449e-05,0.000820320356405389,-21.2115027233083  
"Ddx52",1830.64129985531,0.229612422479958,0.105028839734804,2.1861845  
0950926,0.0288021091035794,0.0762606631316664,0.590930077910472  
"Hnf1b",6393.63837142334,1.24194642587027,0.434608524721203,2.85762095  
133078,0.00426829928860559,0.0176245869396933,5.01555141832283  
"Taf15",11392.3477944879,0.131972793458931,0.207461441799835,0.6361316  
70126263,0.524690604909871,0.657439587078765,0.0553497065649839  
"Ace",3838.27713482133,1.74114902689734,0.403294752324927,4.3173113879  
1146,1.57941269839572e-05,0.00024058897494781,14.5079859821865  
"Mmp28",332.309194144208,-1.65835239181894,0.404238365819202,-4.102412  
17074543,4.08865079581824e-05,0.000496701016927502,-12.6159527829257  
"Rasl10b",37.1416970256033,-0.0836152206209872,0.544736053884628,-0.15  
3496762376401,0.878006543303131,0.923773558241121,-0.00662970904942149  
"Gas2l2",0.428425425755728,-0.534002986488199,2.99194804565996,-0.1784  
80033188681,0.85834600064273,NA,NA  
"Cdc27",1696.58026795504,-0.367396767847392,0.193023452623488,-1.90337  
89047595,0.0569911216105681,0.12858283836645,-0.753597609806052  
"Itgb3",252.500638523764,-1.14857869940083,0.233458805318259,-4.919834  
56282597,8.66173931378702e-07,2.47271732269721e-05,-12.1836723573362  
"Efcab3",4.08075851554331,0.745950767667441,1.34444107751311,0.5548408  
03471484,0.579003554973564,0.703828635590683,0.26199310298724  
"Mettl2",588.174734628954,-0.446587295087376,0.163501041654549,-2.7314  
0336335558,0.0063065232972438,0.0237566830080486,-1.67018798347466  
"Nle1",409.922426567976,-0.404151562249674,0.210774139399227,-1.917462  
75611247,0.0551791681586479,0.125292118406582,-0.839466168678361  
"Tlk2",1692.13150344363,-0.0592580968830206,0.118276105270474,-0.50101  
4949279138,0.616360601979862,0.735213447779479,-0.0182274597506144  
"Mrc2",5569.59083699527,-1.08868217731848,0.386831637452646,-2.8143566  
1386861,0.00488749759492495,0.0195359631213298,-4.28450680292931  
"Rffl",1692.29861197897,0.54010063337781,0.130943284265943,4.124691360  
88627,3.7123223217909e-05,0.000460158045964901,4.15010115751762  
"Lig3",1393.98458663723,0.360265785085316,0.171845399133721,2.09645289  
836928,0.036042034065538,0.0904669902432879,0.865635908156394  
"Cct6b",73.5237073822137,1.21067622592528,0.409819349303052,2.95417048  
507882,0.00313510758941858,0.013967906729413,5.17078963456366  
"Map3k3",1391.09158540061,-0.438833373499455,0.176231054317047,-2.4901  
0241242712,0.0127706290644969,0.0407932053570708,-1.40393317072463  
"Tmem132e",42.1623180973539,-0.513512450064274,0.385588573848555,-1.33  
176262185083,0.182938204144687,0.31108748512237,-0.599618784463367  
"Ccl1",17.5761455434416,-1.73178365747208,0.649915687556182,-2.6646281  
8274775,0.00770734868068713,0.0276805829021989,-6.21194969775908  
"5530401A14Rik",0.551270222265527,-0.960327045511802,3.06501398566404,

-0.313318976684456,0.754038334139858,NA,NA  
"Asic2",182.631164350124,-0.381994625054057,0.15388568106285,-2.482327  
28617578,0.0130527327083286,0.041537813342091,-1.21518262234739  
"Ddx42",4102.14288172746,-0.0449617657189098,0.123780033069905,-0.3632  
39244681066,0.716426173768642,0.812049618424659,-0.00936076239980815  
"Ftsj3",2199.86173965749,0.10465940783504,0.157412028332532,0.66487554  
3144312,0.506130099646271,0.640813291097597,0.046575230561287  
"Rnf135",763.756270246345,0.182335131488244,0.16753000565157,1.0883729  
7998703,0.276430484454549,0.420031295658883,0.158162244160733  
"Psmc5",5533.47664002421,0.154240685287401,0.145135814021811,1.0627334  
5643151,0.287902844054893,0.431942878838281,0.129479182490886  
"Adap2",1280.23808554378,0.357571032618229,0.362809816629433,0.9855605  
22976271,0.324348818071275,0.469185640978836,0.270594298213152  
"Tcam1",6.38273869836534,0.0323055397785912,0.760085396736049,0.042502  
5134245669,0.966098108139592,0.979460321989693,0.000670454662571031  
"Gh",2.18414388616935,-1.63230569547277,2.1101061475707,-0.77356567931  
5228,0.439187674549886,0.581152445088135,-0.885921139466107  
"Ern1",1167.14681322028,-0.257506326466645,0.138403987542215,-1.860541  
2390167,0.0628089895744806,0.138159936679064,-0.509693422890287  
"Nf1",1800.09055689783,0.10797811438044,0.133045071955769,0.8115904842  
85939,0.417026653266922,0.560384954196998,0.0625335071788346  
"Pecam1",5164.60482592045,-0.947669892269587,0.227327809497623,-4.1687  
3718338229,3.06291920289983e-05,0.00039707977804615,-7.42155673437616  
"Polg2",441.070319330387,0.171858693530486,0.14441233114037,1.19005553  
177753,0.234024566502136,0.371671499361297,0.170096262189991  
"Ddx5",59128.9260338451,-0.0127055074066171,0.087738407242464,-0.14481  
1238383956,0.88485990881364,0.928179390039184,-0.000946944727828835  
"Psmc12",3149.08084129647,0.191148895998726,0.22813456834832,0.8378778  
25279318,0.402099323907357,0.545970237990643,0.115681555945088  
"Helz",2806.20599833172,0.251270580947009,0.200466907334746,1.25342673  
405656,0.210050447216852,0.34384716814996,0.268245918594202  
"Cacng1",7.42288676395908,0.473616847815528,0.650974222695166,0.727550  
84810372,0.466888578081538,0.605469827505788,0.23763751290479  
"Cacng4",89.3110139057437,0.00449359794070778,0.370509214839739,0.0121  
281678315382,0.990323359363776,0.993584689764068,2.8920691979117e-05  
"Cep112",214.555554751804,-0.203545446080017,0.334729126882458,-0.6080  
90033800651,0.54312776180972,0.673578906872149,-0.0804310095954924  
"Rab37",98.6870489491192,-1.17049918723107,0.31049161853863,-3.7698253  
9090808,0.000163361797835246,0.00145245250077138,-7.64862901247662  
"Slc9a3r1",10531.7529297906,1.44492145461198,0.343887154414177,4.20173  
139957337,2.6488130457164e-05,0.00035460820897817,11.4791741825332  
"Grin2c",14.2280745335133,0.848044064255298,0.658126909328494,1.288572  
23771716,0.197546840209153,0.328599277923746,0.943802037476686  
"Nt5c",1983.23379853222,0.222508606901454,0.178600259137478,1.24584705  
51836,0.212820550597979,0.347215722162111,0.235371610183349  
"Jpt1",3382.85609665018,-0.764971526082122,0.227643361761105,-3.360394  
61095687,0.000778312184697882,0.00484996196140598,-4.07636834769064  
"Sumo2",7526.78764161655,-0.107062392104038,0.148104875160106,-0.72288  
2295321478,0.469752201652713,0.607698276793034,-0.0533252910328545  
"Nup85",1440.88311013965,-0.0261114415532725,0.134279063613403,-0.1944

56535893406,0.845818425411423,0.901337249749791,-0.00271234649823392  
"Gga3",2111.44289849228,-0.356619524986579,0.180203012932841,-1.978987  
58285183,0.0478174043147895,0.112520365596158,-0.779078519771442  
"Cluh",9809.15743450282,-0.0149030624426763,0.365122542839352,-0.04081  
66045481159,0.967442101874606,0.980058507941553,-0.000300192492869321  
"Mif4gd",2881.2408572813,-0.262366921403054,0.185111078964604,-1.41734  
856104005,0.156381043917684,0.276865304123037,-0.336937938664135  
"Slc25a19",4259.39252760756,-0.277769518543433,0.356838737268881,-0.77  
8417502173064,0.436322924040888,0.578460894332578,-0.152046682641521  
"Pafah1b1",6589.26939890936,-0.261211168537428,0.162537153468589,-1.60  
708590597969,0.108035524597706,0.208872251720979,-0.409065166149192  
"Tmem94",3231.5929103783,0.372788716709277,0.146863602921406,2.5383329  
1090356,0.0111381975422388,0.0368901946116141,1.2301317458818  
"Recql5",1493.50293983415,0.152613170135878,0.155291216169214,0.982754  
6843962,0.325728189619933,0.470587451186237,0.115035758608433  
"Sap30bp",1731.49632268012,0.052866693769675,0.200820554200396,0.26325  
3400430914,0.792355274243062,0.866577470113935,0.00757070975144991  
"Itgb4",1435.75510673183,-1.39888209023927,0.373329628206498,-3.747042  
78618229,0.000178931574931351,0.00155196078648198,-9.04829966927759  
"Galk1",1928.29087870874,0.839536867527524,0.259135963078092,3.2397543  
6506482,0.00119632709292045,0.00673771971628047,4.19771265717063  
"Unk",1758.45936878175,0.0577557997683625,0.241846972552356,0.23881134  
0736793,0.8112518760004,0.879792484468313,0.00739673978915751  
"Trim47",3139.31902572626,-0.0105807926251303,0.328899375206972,-0.032  
1703032073928,0.974336238523446,0.984077077375299,-0.00016983287729753  
"Aspa",2937.31186557101,1.23174390736216,0.525564843175338,2.343657349  
52942,0.0190957055955385,0.0554802663838191,3.56186820053621  
"Mrpl38",2997.28083432515,0.213882158926509,0.191729192615053,1.115543  
00109078,0.264617802075478,0.406499985717858,0.192530599255191  
"Fbf1",2729.92429707976,-0.0382221821581798,0.164150868873725,-0.23284  
7882075986,0.815879530120397,0.882553069530513,-0.0047753401777521  
"Acox1",26049.2615717045,0.747907241367415,0.467246519270102,1.6006694  
7643771,0.109450145154588,0.211063092693518,1.1634431380188  
"Ten1",572.169576873671,-0.0537908172419496,0.221089449546451,-0.24329  
888808488,0.807773865699013,0.877557139446744,-0.00702579128608817  
"Srp68",3096.64790975074,0.00934299151101204,0.105252092440361,0.08876  
77507818296,0.929266487631335,0.956303244594089,0.00041744686730846  
"Tsen54",1049.20735513956,0.451876526652132,0.201573332502139,2.241747  
56175813,0.0249776920595581,0.0684298215227293,1.21190869719086  
"Llgl2",4265.9874358278,1.09204435637376,0.334457143836849,3.265124924  
06642,0.0010941580855758,0.00630425341717043,5.53287628769948  
"Ncbp3",1447.36908411247,-0.0415109392591899,0.134137663144098,-0.3094  
65203777977,0.756967677286199,0.842236690922524,-0.00712718745064673  
"Camkk1",241.182183214434,-0.71852002469767,0.235340637047437,-3.05310  
648306284,0.0022648555725035,0.0110042745216216,-3.24014556550008  
"P2rx1",233.620235640945,-0.600210806749782,0.309597382861347,-1.93868  
17847184,0.0525400980045328,0.12074809416459,-1.26887491768408  
"Atp2a3",1556.13884714187,-0.731927933305368,0.228599272995639,-3.2017  
9466764679,0.00136574311350197,0.00748433367820727,-3.58274572298414  
"Ankfy1",3376.48292807328,-0.208586573595487,0.075711167346812,-2.7550

3047839705,0.00586866683196306,0.0224367188018855,-0.792014990475907  
"Exoc7",1843.03248689118,0.356552767497029,0.151006369946467,2.3611769  
9950955,0.0182170335450322,0.0534691735753483,1.04421825753755  
"Galr2",10.8876080609588,-0.167026426885954,0.649777694873986,-0.25705  
1647361251,0.797138903373088,0.870344626384168,-0.0231942957191574  
"Ube2g1",2419.03039491517,0.103563251032718,0.167091461146021,0.619799  
781044553,0.535389612856621,0.667158348020605,0.0419149327489764  
"Spns3",358.776997072303,0.492465871782888,0.472263665050698,1.0427773  
8946955,0.297051405605363,0.441380567633727,0.402762134993358  
"Tek1",35.3679484458651,-0.670664984776659,0.414334292775081,-1.61865  
671384513,0.105521145201531,0.205334459993957,-1.06173987594191  
"Med31",538.793914056692,0.125972050653741,0.139195787108121,0.9049990  
18080131,0.365465907388193,0.510448013055515,0.0847119817220686  
"Ube2o",1253.26417426869,-0.227122470054901,0.177209869121628,-1.28165  
813326692,0.199962597639177,0.33142389737918,-0.250824304700602  
"Txndc17",5558.97059999223,0.990080116540166,0.270566624949205,3.65928  
398125984,0.000252920941617529,0.002025427025393,6.14045185743562  
"Aanat",2.0252976988733,0.743681225469777,1.63003433442096,0.456236540  
40021,0.648219891954439,0.760194361441577,0.203903365941874  
"Slc13a5",41.4546008056541,1.7095513966323,0.571425388705396,2.9917316  
0735019,0.00277400026816853,0.0127564757614976,7.45657807861531  
"Rhbf2",1466.17482115423,-0.470167028382069,0.205735577112215,-2.2852  
9763778107,0.0222953813597094,0.0626599269455372,-1.30237825904927  
"4933427D14Rik",733.99758782808,0.254820153353523,0.370029815258791,0.  
688647624719935,0.49104504321142,0.627500082090462,0.118749116073076  
"Pimreg",97.8435530883937,-1.12382422964485,0.380755130262594,-2.95156  
687414767,0.0031616607474809,0.0140561913731867,-4.7927645534834  
"Cygb",3899.73128692857,-1.20506122176246,0.248037659969699,-4.8583800  
6176025,1.18350065970284e-06,3.13957766841986e-05,-12.4950835938786  
"Wscd1",313.263273122651,-0.0851763216780373,0.272561906943712,-0.3125  
02662727655,0.754658539757064,0.840663075185777,-0.0147835706346264  
"Mxra7",1722.06992335392,-1.02427347607959,0.300732814567812,-3.405925  
21488414,0.000659402393298959,0.00427143782875186,-5.58823612720822  
"Rabep1",2271.27325075786,0.221944627970562,0.118614736351037,1.871138  
73704295,0.0613258535726398,0.135839267217332,0.443064276858795  
"Mfsd11",2449.03664200292,0.339556149857659,0.132188025266184,2.568736  
08009426,0.0102070160782583,0.0343843122829787,1.14435680763488  
"Kif1c",11266.7789779115,-0.305188029485213,0.200232092991645,-1.52417  
139992613,0.127465900425717,0.236675566755607,-0.439795785363936  
"Sec14l1",4174.31102474296,-0.345344271671266,0.120478993263158,-2.866  
4272693327,0.00415133536083677,0.0172475467431484,-1.40212722274902  
"Nos2",146.900515093659,-2.28987424902036,0.523919857173466,-4.3706574  
921099,1.23872970261932e-05,0.000200437773789805,-19.4982946058854  
"Mink1",6514.18179798569,-0.0101049827286582,0.169180044181773,-0.0597  
291647341163,0.952371343097323,0.970244861929682,-0.000305239236365997  
"Pld2",1630.97482212457,-0.575920800917318,0.207644127406108,-2.773595  
42074088,0.00554405787817531,0.0214430649026237,-2.21289159334618  
"Slc46a1",982.208033428461,0.941193133163687,0.282274166614982,3.33432  
260008214,0.000855074241872157,0.00522640676113584,4.94505816290479  
"Vmo1",3.88638604310886,-1.1771973048732,1.00131979515753,-1.175645693

3801,0.23973648816246,0.377942407541418,-1.14542881797584  
"0610010K14Rik",1222.24317806233,0.343176448040379,0.121183989722207,2  
.8318629286513,0.00462776822676617,0.018681620059107,1.36591608835086  
"Era11",1240.22885955644,0.0965389574028511,0.188905592237332,0.511043  
406706373,0.609320662597088,0.729135527146067,0.0304962372743368  
"Dhrs13",293.385581524879,0.688720831975274,0.215204662651795,3.200306  
2735199,0.00137281622508471,0.00751084002638148,3.36881456324242  
"Coro6",414.934747119017,-0.16874217472075,0.384760045989905,-0.438564  
701505357,0.660976978588462,0.769738346085997,-0.0441606087653292  
"Slc6a4",115.761222126249,1.69326041325947,0.35943106178351,4.71094625  
171641,2.46569263878714e-06,5.63611665545975e-05,16.5664029957436  
"Tmigd1",7955.31018613379,2.16053708369478,0.756446949970695,2.8561647  
1026618,0.00428792626051812,0.0176794219132126,8.71853178896403  
"Blmh",3637.26167187396,0.0324732676903529,0.222947545559086,0.1456542  
95538081,0.884194303352535,0.92793048747337,0.00242895024364271  
"Cpd",6439.74396368434,-0.226638482564581,0.126831877994314,-1.7869204  
9781634,0.0739503390308403,0.156689376227368,-0.420072144913841  
"Timm22",1454.98562435318,0.509813051683083,0.24744428616302,2.0603145  
0387669,0.0393684842535855,0.0967819150352776,1.19056393695997  
"Nxn",1152.16430522537,-0.720707536954703,0.189321979212138,-3.8067821  
8109658,0.000140786638290692,0.0012972863295803,-4.79088939543093  
"Rflnb",2955.10977945053,-0.897955921509066,0.360040835434306,-2.49403  
910094223,0.0126298630761928,0.0404258080326176,-2.88090020653746  
"Rph3a1",454.303388274557,0.768305482390844,0.219129994816444,3.506163  
0108394,0.000454616703538673,0.00320814928903259,4.41165698768783  
"Doc2b",72.1010167263477,-0.815086127633991,0.34193279446249,-2.383761  
19762156,0.0171367185498849,0.0510982930548488,-2.42406955581531  
"Ywhae",16540.5842644262,0.0309011841785391,0.155977915397605,0.198112  
56035682,0.842956997858058,0.899467823796662,0.00327404218701742  
"Prpf8",5601.84508719701,-0.338459506597673,0.175692397300655,-1.92643  
228618756,0.0540504192861485,0.123332366909459,-0.708352559169162  
"Nme2",16363.6977421309,1.36321710551762,0.255901941119344,5.327107326  
95015,9.97892043748689e-08,4.56734719929857e-06,16.762905473235  
"Spag9",6448.19923646154,0.112601682175484,0.113789709713052,0.9895594  
46626905,0.322389499967136,0.467565491695866,0.0856015836250989  
"Luc7l3",14171.3716409943,0.352576737034944,0.239944349783498,1.469410  
45852121,0.141721492309363,0.256620139027485,0.479560191395869  
"Ankrd40",3983.01970006676,-0.113630962346524,0.211104962246837,-0.538  
267604594062,0.590392313078293,0.713756778298646,-0.038317840127956  
"Abcc3",1882.56003771729,-1.98071978058959,0.44105376288347,-4.4908805  
8480734,7.09293120034002e-06,0.000129613844933674,-17.7293256048419  
"Cacna1g",627.086429683228,-0.803531746913352,0.549365452903041,-1.462  
65430901635,0.143561994540121,0.2592545864169,-1.08472345591756  
"Spata20",7.53055903480227,-1.15169588061909,1.00056145535911,-1.15104  
961764266,0.249711823478156,0.389261363461552,-1.0866299874081  
"Xylt2",1455.06568928629,-0.302024705706083,0.118122081310264,-2.55688  
608222855,0.0105613798086096,0.0353976225937466,-1.0090979515758  
"Lrrc59",2915.8145904742,-0.715688505701542,0.248976103881786,-2.87452  
689050573,0.00404633312177237,0.0169451707506882,-2.91841483355343  
"Cdc34b",3.29209077407674,-2.67327700803058,1.1736528110714,-2.2777408

9817091,0.0227420194725782,0.0635277787501905,-7.36829462681699  
"Dlx4",2.80670262653731,-1.62833307024433,1.1299176182,-1.441107779909  
06,0.149554235963688,0.267387043824754,-2.14786587353609  
"Tac4",3.11000749975659,-1.11296183982127,1.05289683072924,-1.05704738  
331335,0.290489962883067,0.434253875357972,-0.928350351559781  
"Slc35b1",2002.65328649722,-0.00430751534398453,0.104792290535414,-0.0  
411052695000385,0.967211973702355,0.980031236663284,-8.68861755744644e  
-05  
"Hoxb9",2955.47286811081,0.217357324829548,0.32090287260923,0.67733056  
7539755,0.498196240674559,0.633855158282059,0.0991007700795536  
"Snx11",1192.41960488495,-0.50035239119766,0.130769878261878,-3.826205  
22285463,0.000130133813000182,0.00122193349506861,-3.35602402219211  
"Scrn2",3337.00515013419,1.61384180149765,0.387365377163526,4.16620043  
152789,3.0971842169693e-05,0.000400988697625946,12.6227884270561  
"Lrrc46",39.9028396155893,0.797945181454937,0.305784163644661,2.609504  
59940167,0.00906734271353346,0.0313466397568219,2.76300344820922  
"Cacnb1",780.265557299043,-0.127132375596477,0.24555960250699,-0.51772  
512375222,0.604650066579245,0.725639625663945,-0.040771577977176  
"Fbxl20",2869.63613536481,-0.127250371100438,0.165498095545752,-0.7688  
93265392649,0.441956675721462,0.583509700922065,-0.068549037113102  
"Asgr1",25.7450760271161,-0.172870567249309,0.478283385266357,-0.36143  
962465482,0.717770831012449,0.812959376304429,-0.0357970237554197  
"Dlg4",1166.1430476733,-0.440010317900339,0.325212485056258,-1.3529933  
1396893,0.176057766366801,0.302385494236688,-0.526275486784955  
"Dvl2",722.306915446496,-0.220482485992486,0.101117105701961,-2.180466  
74162482,0.0292228815428422,0.0770712490629429,-0.565102117588895  
"Nr1d1",3089.78070875378,0.600236545057098,0.443347420254549,1.3538739  
9956556,0.175776579899541,0.30212374425963,0.718434282974194  
"Gucy2e",3.3145967667997,0.647845113077852,0.78949780985515,0.82057873  
371012,0.411886265162879,0.555389196420526,0.38098874235527  
"Alox8",85.6861396559177,-0.164275883209417,0.297966037062526,-0.55132  
4187242671,0.58141146074448,0.705787614344159,-0.0572404392695146  
"Aloxe3",12.843867719358,-2.50093370946276,0.626274332920156,-3.993351  
75976564,6.51458131156147e-05,0.000710409991123185,-18.1309398396561  
"Per1",3521.86089285853,0.751640897884112,0.279980889109541,2.68461501  
166973,0.00726133951370332,0.0265233416706983,2.72825360340717  
"Vamp2",6314.91842343379,-0.0307456023610354,0.162522154315576,-0.1891  
77915407985,0.849953376074785,0.904359668578781,-0.00309079804157948  
"Tmem107",451.78376201397,0.325511990411297,0.256151733797067,1.270778  
0095261,0.203807634079302,0.336196383187668,0.354827540368448  
"Aurkb",169.489694535259,-0.743600236769269,0.448182300445855,-1.65914  
681599325,0.09708621147543,0.192858174950506,-1.22381742213082  
"Ctc1",1207.02255297376,0.123897367645268,0.168986072306938,0.73318094  
1801093,0.463448077614474,0.60251166438802,0.0627723849709413  
"Pfas",1981.4203774416,0.443400799936982,0.155918207762322,2.843803852  
67698,0.00445784815723157,0.0181773578262783,1.77696352817737  
"Myh10",2730.96775932432,-0.655894075106254,0.195959990506479,-3.34708  
158237316,0.000816671720133909,0.00503907126556043,-3.47002956800261  
"Pik3r5",630.123059922069,-1.17664541135729,0.345185480127038,-3.40873  
379414525,0.000652651336929691,0.00423756102812358,-6.42891684518396

"Ntn1",2429.39127041759,0.231834166281402,0.262751696141464,0.88233175  
917001,0.377597426699182,0.522785956527774,0.150363736076628  
"Stx8",1296.81264921536,0.436786748104174,0.188574454548319,2.31625619  
254942,0.0205442846986415,0.0586232201162173,1.23899995302036  
"Cfap52",39.4631105060164,1.08694774342245,0.865245993092063,1.2562297  
3362535,0.209032689383016,0.342612590584233,1.16428944887515  
"Usp43",418.198755549526,-0.196762015163901,0.249909253488859,-0.78733  
3851856238,0.431086458075541,0.573350870365409,-0.109450329032731  
"Rcvrn",1.18549149430415,0.915717380940997,1.55021462724196,0.59070361  
2808881,0.554719026843616,NA,NA  
"Myh3",2.86400732362286,-0.467017123792325,0.95212274052687,-0.4905009  
65803941,0.623779446558401,0.741386872843384,-0.139746792248492  
"Adprm",728.862630364406,0.01316706229014,0.130985728500625,0.10052287  
7116931,0.919929221510203,0.950847114133054,0.000663646176474472  
"Krt19",4941.26724416312,-2.09489376872164,0.584229061995932,-3.585740  
43126979,0.000336123161393729,0.00252844498489774,-12.5277806378871  
"Krt12",12.1356542648275,-1.43987377463228,0.581203050540079,-2.477402  
30078678,0.0132342635819469,0.0420126459330512,-4.5640897345907  
"Krt24",0.15580818916143,-0.0620942904651072,4.78471990595397,-0.01297  
76228672945,0.989645645723552,NA,NA  
"Top2a",705.997537624955,-1.04724178424267,0.415019998049053,-2.523352  
58340707,0.011624178674425,0.0381113562794583,-3.4215933639337  
"Krt36",9.67802626641924,-4.32866952713787,1.38764115865836,-3.1194444  
6165249,0.00181192415512789,0.00925809674441392,-20.2679422704322  
"Acly",26030.5433574471,-3.31961857768615,0.722273086827299,-4.5960712  
620044,4.30531506572453e-06,8.84563046907238e-05,-30.982006360648  
"Kat2a",2137.3593290074,0.172883187446003,0.150745586356554,1.14685405  
804909,0.251441942916569,0.391426347543893,0.162157153193238  
"Stat5b",2120.78785036788,0.0235339786513129,0.100071970710709,0.23517  
0532609431,0.814076376244062,0.881747956198947,0.00296172833260207  
"Tmem101",671.950183503041,-0.0619818956566579,0.145453347195135,-0.42  
6129043104833,0.670013818287611,0.776644041910221,-0.0156673591384218  
"Lsm12",2039.40895659274,0.134735316576327,0.187662354700432,0.7179666  
73664554,0.472777835698212,0.610478294069122,0.0664935683670381  
"Ubtff",8278.89183128595,0.164605725335348,0.083696173009056,1.96670551  
851322,0.0492171703196864,0.115009154709162,0.355999970370443  
"Ccfdc43",949.277674929204,-0.220819758003491,0.134155729047481,-1.6459  
9573623379,0.0997646368528995,0.196983381200793,-0.358751709194271  
"Adam11",1056.10831169958,-0.0152366080934258,0.293444903478513,-0.051  
9232329913048,0.958589861992803,0.974775160952669,-0.00038927154830694  
1  
"Higd1b",76.0267209763683,-1.37959676290499,0.524144406321058,-2.63209  
288560057,0.00848606587979502,0.0297645822133915,-4.84850467892385  
"Eftud2",2622.68240788661,0.263964711725191,0.236967518151545,1.113927  
82345967,0.265310151911978,0.407180975321621,0.237171642959944  
"Ccfdc103",74.4188549727925,1.05754153941035,0.288923099468498,3.660287  
2575983,0.000251932652466418,0.00202230665203385,6.56047640196526  
"Gfap",18.7860937562489,-0.715225239249719,0.490699788121024,-1.457561  
74460242,0.144961380672146,0.261201090504158,-0.960164640970113  
"Dcakd",1004.33688297601,-0.243821920456294,0.139021619952894,-1.75384

174446328,0.0794576279330187,0.165484386823115,-0.438605992995194  
"Nmt1",7359.14577770919,0.267164423379032,0.192836250247634,1.38544709  
843688,0.165915797906074,0.288790057808662,0.331832987608943  
"Plcd3",1119.41506886447,-0.149132371321389,0.208397205113206,-0.71561  
5985542499,0.474228500207183,0.611865226114323,-0.073260269200591  
"Efcab15",4.08988029800232,0.211644569095503,0.904689504835099,0.23394  
1665029131,0.815030266533283,0.882212657080868,0.026523751214894  
"Map3k14",1208.49929934351,-0.84539928017802,0.220741875588905,-3.8298  
0926442989,0.000128242620726705,0.00120629101447548,-5.68125638870294  
"Lyzl6",0.273975376445809,-0.981078679014927,4.78175924886694,-0.20517  
1073647716,0.83743846856737,NA,NA  
"Gosr2",3803.04633392857,-0.250554094379179,0.144961234136724,-1.72842  
136638312,0.0839127075659261,0.172496570597831,-0.440318234054551  
"Klhl28",800.272064898574,-0.178489674868576,0.0940063832908699,-1.898  
69739288131,0.0576042745513487,0.129655709976868,-0.364631688749989  
"Fkbp3",2230.27848432393,-0.0352858845205264,0.190488998020747,-0.1852  
3843837261,0.853042021295868,0.906427978408292,-0.00346661592813881  
"Foxg1",1.57496002795412,0.694827051377595,1.12197909956034,0.61928698  
2841186,0.535727318298425,0.667408552308651,0.280955332097217  
"Scfd1",1576.41108771824,-0.00436825406853058,0.122772210836502,-0.035  
5801531858692,0.971617133763788,0.982603261106138,-7.66621617245377e-0  
5  
"Coch",181.047797673706,-0.602139647476148,0.558867762926022,-1.077427  
769896,0.281289203460623,0.425259896803538,-0.514862380833664  
"Strn3",1784.97816548405,-0.0945276757223225,0.152575527468601,-0.6195  
46773264641,0.535556218799293,0.667323309953261,-0.0382346136336791  
"Ap4s1",1115.69632508624,0.201466419461451,0.213150727956601,0.9451828  
8252091,0.344565516891419,0.489068824950782,0.144099270148591  
"Dtd2",837.191462600342,0.306346348022753,0.276254963208966,1.10892613  
281675,0.267462049200099,0.409563734807471,0.273463972634238  
"Ston2",890.302092044717,0.0811528809920537,0.194771111693826,0.416657  
687509756,0.67692880768861,0.782369095919354,0.0199172428469376  
"Gtf2a1",2727.36608558846,-0.0909128511189227,0.0980321674626644,-0.92  
7377752343861,0.353730437594309,0.498665033057178,-0.0632590423477854  
"Tshr",336.677913239639,-3.24071930312238,0.712713494062568,-4.5470154  
9798058,5.44119929395247e-06,0.000105880742348788,-29.6629427521671  
"Sel1l",5398.47856369594,0.250975254960138,0.141467464344139,1.7740846  
3581142,0.0760491517705231,0.159809598618809,0.460231440666101  
"Dnaaf2",238.967151525287,0.0863556185777381,0.209185020689155,0.41281  
9322785358,0.679738993336763,0.784419442002853,0.0209681285704533  
"Pole2",140.249352792902,-0.488504000747211,0.227507517243947,-2.14719  
938340942,0.0317774117863449,0.0821418500610039,-1.2209217848736  
"Klhd2",2612.81253177849,0.101194879680925,0.108455051516286,0.933058  
241789029,0.350789897987708,0.495702379400227,0.0710164995419221  
"Nemf",5005.83382978393,0.610650938063533,0.217033914569477,2.81361988  
643507,0.00489871158215812,0.0195692834632513,2.40217506481487  
"Sec23a",1355.26505113238,-0.401045171541962,0.105622872730302,-3.7969  
5383372117,0.000146485056922101,0.00134044651593,-2.6528145509425  
"L2hgdh",2249.92691995579,1.07624803017255,0.313757854273654,3.4301867  
3640553,0.000603165994665063,0.00397987497935005,5.94788998266247



"Cdkl1",1746.94605661848,1.20869764993991,0.549906623697953,2.19800525735041,0.0279487312915974,0.0744866542815153,3.13915134191054  
"Trappc6b",2678.36185212296,-0.219026247990188,0.21969266251313,-0.996966605460016,0.318780719698054,0.463849736766616,-0.168254785866087  
"Pnn",7686.5176447825,0.0459107868612252,0.100431485635306,0.457135395048715,0.647573730808724,0.759802178559905,0.0126115632669581  
"Mia2",6040.63238841395,0.616205381753278,0.162462396164909,3.79291082920994,0.000148891634052394,0.00135531703116414,4.0692477300653  
"Galc",3325.43513426601,0.791340797229544,0.172038777431123,4.59978156695727,4.2293418257731e-06,8.73556217361482e-05,7.39549375169095  
"Spata7",599.902391429825,0.482137295188733,0.171145284138437,2.81712287671766,0.00484559833197453,0.0193963203196139,1.90090916816563  
"Ptpn21",1550.53599410419,0.251681797989905,0.123823364030963,2.03258730660047,0.0420942349913354,0.101844123451827,0.57491971006452  
"Npas3",26.5185365645066,-0.365118510386505,0.67150137217517,-0.543734570792893,0.586624139149087,0.710169965548795,-0.12496215685931  
"Zc3h14",3184.73217526227,0.129936712244269,0.0955343527474563,1.36010459596408,0.173796826899339,0.299618968247862,0.156605406096491  
"Ttc8",870.855979113677,0.0446255917302513,0.147141030811336,0.303284484852292,0.761673069017809,0.845664505366508,0.00748070235236726  
"Polr2h",836.362950593389,0.283189187757315,0.159685990804379,1.77341284812036,0.0761603215683428,0.160018744605555,0.518934081476094  
"Ppp2r3c",1026.42450812807,0.146145759611256,0.158238791158675,0.923577326021829,0.35570642351409,0.500762732539908,0.101077750843536  
"Prorp",513.836968949524,0.647358699258342,0.172637937610737,3.74980556543719,0.000176971733974377,0.0015383838025111,4.19295711477736  
"Pasma6",3986.42877098674,-0.219685208814197,0.316260212759487,-0.694634354721267,0.487284476780904,0.624085176581323,-0.103574638076547  
"Nfkb1a",6349.80790747698,-0.397696129404274,0.229186223633023,-1.73525320632305,0.0826959660823086,0.17049867258886,-0.703535496019573  
"Ralgapa1",2351.54152815012,-0.662554720633565,0.208829172376145,-3.17271151867693,0.00151022504517458,0.00808743969536225,-3.19181965119309  
"Mbip",553.348475482155,-0.078334563026376,0.17106213650983,-0.457930460969512,0.647002401671023,0.759497461034413,-0.0215497051116047  
"Ngb",87.8822693591232,-0.751953780894647,0.268670259303776,-2.79879798695709,0.00512932166657196,0.0202534454951033,-2.93219139651931  
"Gstz1",9078.38989805241,0.0770438482233418,0.54722989723121,0.140788814012459,0.888036780167606,0.930610616989572,0.00554055679335086  
"Sptlc2",4647.51394630932,0.684289361624247,0.167929550294012,4.07485972794061,4.60420910975015e-05,0.000543419305217364,5.14423377849774  
"Ahsa1",4311.67589752277,-0.0777486421983423,0.149362319980456,-0.520537189088356,0.602689214650527,0.724267137581262,-0.0250813216820796  
"Vipas39",1630.36031069051,0.356419025576271,0.08912164917689,3.99924181013353,6.35457291303075e-05,0.000696466906454601,2.59098464201131  
"Snw1",3340.13363617757,0.18150736348199,0.168884432742109,1.07474300937586,0.282489802154721,0.426413730929221,0.154706930873876  
"Slirp",1669.10392805461,0.629224860482363,0.190102693705684,3.30992080236656,0.000933223723386408,0.0055662270292408,3.26633005316343  
"Adck1",767.517018068679,0.159558433962663,0.219618419143703,0.726525737617023,0.46751653525231,0.605851216559188,0.0799580565021158

"Nova1",317.262636823586,-0.700265147444561,0.486209508768037,-1.44025  
391280171,0.149795575208665,0.267709819011783,-0.922845579973544  
"Mthfd1",5247.85044796628,1.46128553980032,0.31813773408914,4.59324809  
106385,4.36399734603992e-06,8.93794330389563e-05,13.6230097373056  
"Ppp2r5e",2163.07997539929,0.191531765981744,0.104909784875996,1.82568  
066656638,0.0678983770355913,0.146609363836097,0.367737853049677  
"Sgpp1",5233.3479905064,1.04550306025766,0.287700235365831,3.634001407  
50053,0.000279059337479487,0.00218246903950941,6.40610928700949  
"EsR2",8.01930623325753,-0.387050244371341,0.863366810311626,-0.448303  
362775363,0.65393427404967,0.764374907157495,-0.103999198485562  
"Tex21",2.96004523372668,1.34379308222084,0.844656630813267,1.59093415  
383123,0.11162439523682,0.214196679296085,2.07059784707414  
"Akap5",84.578645171319,-0.629224373159952,0.374026987591121,-1.682296  
71664176,0.0925113174979129,0.185918951615575,-1.05863505080035  
"Sptb",237.883113372433,0.453651433059488,0.416162404658054,1.09008268  
882971,0.275676721149273,0.419081920237683,0.394535599685669  
"Rab15",906.527341762871,-1.26590048819587,0.338306738266256,-3.741871  
93161838,0.000182654597824347,0.00157793502365047,-8.16713198983068  
"Fut8",2077.60398290797,0.65171155691835,0.148420545553282,4.390979392  
29977,1.12841236090156e-05,0.000187795454709123,5.59178760370784  
"Atl1",235.389696787273,-0.147327016675414,0.159744713487771,-0.922265  
366150552,0.356390174717887,0.501508056195825,-0.101675620155941  
"Sav1",3064.7325528906,-0.385413138821781,0.170653173405011,-2.2584586  
6872384,0.0239170785812485,0.0660425269890038,-1.04734339924792  
"Nin",1089.02188736906,-0.553525747041881,0.197495376872848,-2.8027276  
1725583,0.00506724454284363,0.0201036203220238,-2.16254503428165  
"Pygl",3750.84472464122,-2.87496124931719,0.733919316489298,-3.9172715  
3751663,8.9556853036544e-05,0.000906635265060506,-20.1413181975578  
"Bdkrb2",115.775616872004,-0.34544630665881,0.262249655275959,-1.31724  
217633501,0.187757460645163,0.316659023238421,-0.397238974860053  
"Trim9",13.5713090356298,-1.01060129486019,0.743214850195151,-1.359770  
05114312,0.173902702492328,0.299748487729438,-1.21758409247591  
"Tmx1",2823.01109287026,-0.0107852356966845,0.16532999147284,-0.065234  
5990016959,0.947987213767233,0.967842428214133,-0.000352526060036737  
"Actr10",2797.06987188368,0.228707493193066,0.125607335760643,1.820813  
18585477,0.0686352592334794,0.147921994532373,0.437076076618624  
"Tomm20l",0.323393249422347,0.869709338651851,4.78471990595042,0.18176  
8077493994,0.855764737612356,NA,NA  
"Timm9",1820.72088011016,0.963810080354408,0.197890036346409,4.8704325  
8038138,1.11354192303282e-06,3.01135095912537e-05,10.0337801779597  
"Serpina1f",3954.79800279208,2.30560998741446,0.733220451296203,3.1444  
9765188431,0.00166372246510938,0.00872023135072653,10.9334550485143  
"Rtn1",438.719313095385,-0.788383230517893,0.53251903156803,-1.4804789  
7592779,0.138745467370256,0.25254814651244,-1.08493623888735  
"Lrrc9",13.6710862693947,-1.7936661907534,0.788164386394146,-2.2757513  
8095166,0.0228608941883904,0.0638104910192588,-4.93587818414499  
"Serpina3n",837.80368291551,-2.82944306126094,0.614238214129798,-4.606  
42629548776,4.09648164765835e-06,8.51526643561221e-05,-26.514894448139  
7  
"Dhrs7",2174.56724893414,-2.29939087368655,0.579966384337229,-3.964696

80965084,7.34892931244656e-05,0.000776698269304374,-16.4646931811044  
"Gsc",1.6361265371173,-3.15618367432073,1.86748921733797,-1.6900679506  
0361,0.0910149555154339,0.183573973584352,-5.35016551444257  
"Ppm1a",5258.84070693933,-0.0679560274778449,0.244363402793007,-0.2780  
94128257857,0.780940103006437,0.858523349595145,-0.0103661076299712  
"Clmn",5652.87656653578,0.614151809934857,0.170854838151324,3.59458249  
224942,0.000324912188880842,0.00246311736345204,3.68879691155474  
"4930447C04Rik",5.77146638987535,-3.51644153247413,1.86832551236736,-1  
.88213537159187,0.0598176378486038,0.133263745746352,-7.08712439953277  
"Glr5",3867.13818415045,0.449671468675204,0.442903414085382,1.0152811  
0729017,0.309971847591642,0.455210596094136,0.353889250800393  
"Mnat1",777.566849039397,-0.295622027447979,0.199117920350874,-1.48465  
807058979,0.137634424117683,0.251061465192869,-0.408566636824386  
"Prkch",807.353451741636,-0.841471655837899,0.160349649344879,-5.24772  
994063783,1.53984797275916e-07,6.36100757899534e-06,-10.0684808043601  
"Hif1a",3248.60374055698,-0.200470731703165,0.197528514323228,-1.01489  
515268222,0.310155809084598,0.45532955287252,-0.157717106591128  
"Papola",5721.88523229051,-0.0701901489831798,0.166570355959413,-0.421  
384396874812,0.673474410976777,0.779418888440524,-0.0174918520160234  
"Mpp5",3006.12536576408,0.771720219439506,0.203669797992236,3.78907539  
088798,0.000151209023851207,0.00136874352230773,5.08861670442847  
"Snapc1",1134.17263361339,-0.104543636520049,0.105565005837696,-0.9903  
247358389,0.322015419924542,0.467132656324739,-0.0795725526925068  
"Atp6v1d",5025.4048049261,0.695346664784836,0.188913292576574,3.680771  
50792861,0.000232529310457728,0.00190418164439512,4.35544495249223  
"Vrk1",792.07750626899,-0.430659414454778,0.160244150344446,-2.6875203  
46478,0.00719847166020034,0.0263430556363713,-1.5661147442535  
"Eif2s1",2049.84951481032,-0.747576516715438,0.273469187750331,-2.7336  
7732162189,0.00626313893754401,0.0236343493331204,-2.79971453256873  
"Plek2",187.890712389985,-0.478891687141876,0.275829438361545,-1.73618  
773248621,0.0825306456557051,0.17022982428805,-0.847928421505207  
"Pigh",892.820692937816,-0.314470565880472,0.203348104564692,-1.546464  
2099992,0.121992497243269,0.229506919263726,-0.462844728863249  
"Rdh12",194.522875067919,-0.812352889722015,0.266965781681726,-3.04291  
016101267,0.00234302271213035,0.0112856365714223,-3.64277269960029  
"Vti1b",3815.66172874962,-0.0509715602647671,0.277377840406987,-0.1837  
62193079225,0.85420001654523,0.907244357914745,-0.00496174761956567  
"Arg2",439.660463411926,-0.2019401448129,0.292235073286498,-0.69101953  
6231111,0.489553263991391,0.62612722474937,-0.0945487179097021  
"Zfp36l1",10346.6173336591,-0.906217834419957,0.167763614137893,-5.401  
75436179559,6.59922775885295e-08,3.34212319070428e-06,-11.426413919338  
8  
"Galnt16",356.299362391159,-3.14667798295826,0.675643182094587,-4.6573  
0738701918,3.20371923269976e-06,6.99461449050479e-05,-30.1067383124217  
"Erh",2985.6688963595,0.00583273483887375,0.120258886174249,0.04850148  
72865398,0.961316579155268,0.976507253256082,0.000138662193750559  
"Susd6",3537.59353021747,0.0922341153100869,0.18955857901091,0.4865731  
5216938,0.626560853442044,0.743242898364238,0.027368847814438  
"Srsf5",28595.581071746,-0.205466530201138,0.0996604663154449,-2.06166  
535033858,0.0392396075916175,0.0965174553830399,-0.480387199710625

"Slc10a1",15.0900633548053,2.26684690579198,0.861804907457409,2.630348  
10567496,0.00852974772000573,0.029874801696546,7.95830989414663  
"Smoc1",969.088955862469,-3.30200703359352,0.815913579851674,-4.047005  
85347997,5.18769445102337e-05,0.000593949890816522,-24.5296711652488  
"Gm20498",189.102606001571,0.533745492779194,0.32893613533699,1.622641  
70895174,0.104666018921787,0.204077803693701,0.848257141870959  
"Pcnx",2087.70790381427,-0.262374537978608,0.188492152303292,-1.391965  
31405953,0.163932901735457,0.286463857146257,-0.328005666805529  
"Pacs2",2867.01207113921,-0.279167127586296,0.135609404671142,-2.05861  
18511713,0.0395314365467345,0.0970336600864708,-0.6512124185804  
"Mta1",2149.55807706894,-0.0761891975172772,0.145559233593054,-0.52342  
4008471234,0.600679220406333,0.722341398759263,-0.0247811003216004  
"Wdr37",1470.03779640684,0.0495571271952172,0.109635341451288,0.452017  
812314981,0.651256150432409,0.762404073950657,0.0134437872465143  
"Gm9745",0.0983898136351889,-0.544048378937457,4.78471990596623,-0.113  
705376621746,0.90947135024012,NA,NA  
"Gtpbp4",2324.51876099758,0.155026904012957,0.150214195806391,1.032038  
97062278,0.302053861670188,0.446722005254968,0.124923592211872  
"Zmynd11",6180.23427845364,0.001543100005687,0.209852321369972,0.00735  
326631420241,0.994132995208479,0.996250456664318,5.79679481352251e-06  
"Esyt2",4182.1478053792,-0.586449740047314,0.109482224495889,-5.356574  
93942619,8.48143316627542e-08,4.02362491182574e-06,-7.28565709040184  
"Cdca7l",313.796252307168,-0.740107231923766,0.231682715078425,-3.1944  
8618198919,0.00140079990874684,0.00762516117774309,-3.60898624102395  
"Efcab11",28.3897692060736,0.449451128475892,0.461504333297515,0.97388  
2791661996,0.330114738955635,0.474743854562396,0.334832045038581  
"Tdp1",471.147459799878,0.20480687117545,0.165623600481141,1.236580237  
23962,0.216242960596043,0.35153453774401,0.214114793440272  
"Psmc1",6046.79736001865,0.11425489044476,0.175688631202833,0.65032603  
2268146,0.515481645107095,0.649238493398239,0.0493529885128356  
"Nrde2",1022.06774390194,0.327164845755795,0.140769136461721,2.3241234  
1212848,0.0201188805831343,0.0577303802222154,0.933064889089295  
"Rps6ka5",493.178092137662,-0.326787482096166,0.168779423928212,-1.936  
18081215374,0.0528455596756645,0.121299604840142,-0.689355487924781  
"Cc dc88c",2000.85706775566,-0.0532679032041864,0.286147380095388,-0.18  
6155481089603,0.852322834597689,0.906089669537415,-0.00525312106796046  
"Dglucy",3541.48575006037,1.29044665278066,0.346114687736465,3.7283787  
6722301,0.000192715579077346,0.00164589065302238,8.27108376724168  
"Fbln5",5725.92372465688,-0.703627530869042,0.340107155886821,-2.06884  
071296398,0.0385610365421965,0.095348239825753,-1.65367907852032  
"Tc2n",321.421252546633,-0.116720249532093,0.434922726349508,-0.268370  
086134096,0.788414463013304,0.863526862140962,-0.0171263941293344  
"Trip11",2509.72827936798,-0.0290418245733159,0.151315615814557,-0.191  
928800057938,0.84779797762218,0.902791705035749,-0.00296991636556002  
"Atxn3",1334.82726254609,-0.175465312304764,0.11362057698224,-1.544309  
28767586,0.122513423646536,0.230153842784483,-0.257759826776117  
"Lgmn",18495.3585346162,0.859669928876992,0.34653428345358,2.480764443  
59119,0.0131100977934008,0.0416923380695072,2.73154781900584  
"Golga5",1811.38543306914,-0.0802509632686701,0.112716238463477,-0.711  
973397645573,0.47648124940274,0.614080996817676,-0.0391326522594503

"Pitrm1",1936.11454957333,0.0525605937432692,0.181205975713454,0.29005  
9936138005,0.771770385108574,0.852431822854301,0.00839193194726929  
"Chga",2.22871236743544,-1.34320742248464,1.45068427489231,-0.92591299  
5496108,0.354491197145498,0.499593014957928,-0.932134213671953  
"Pfkp",3730.30346536011,-0.495643543604049,0.180941054078705,-2.739254  
20699968,0.0061578740050055,0.0233364873371423,-1.86249816347328  
"Unc79",13.6221163784892,1.33204535615651,1.06422343031737,1.251659490  
11221,0.210693967222921,0.344495679070232,1.41952574484811  
"Asb2",452.810911056438,-1.32706348875602,0.289415048250443,-4.5853299  
5011252,4.53270058781475e-06,9.20610375637625e-05,-12.3324789648245  
"Otub2",288.104456993481,-0.370032535889513,0.172530522582676,-2.14473  
665500082,0.0319739084224681,0.0825014353013835,-0.923208822712897  
"Akr1c21",32849.2937239914,2.35761866868257,1.04604863752623,2.2538327  
4171461,0.0242066921859597,0.0666829731904271,6.38397311189001  
"Ifi27l2b",5.61565839551009,-1.6978064722952,0.850290165658042,-1.9967  
3775008472,0.045853678997062,0.108712917447071,-3.76750837953332  
"Ppp4r4",251.311315771369,0.268108034429195,0.338152961540094,0.792860  
228720507,0.427859261183301,0.570849861403586,0.150309150936755  
"Akr1c6",11.435041731672,1.87436795872765,0.504792351935902,3.71314650  
774594,0.000204698307362594,0.00172555451662596,11.9251166125346  
"Akr1c12",123.371043106111,0.629287842111365,0.481369127127043,1.30728  
749861286,0.191115088369888,0.320966772951494,0.715133824716419  
"Akr1c13",419.038091139418,-0.400448249782594,0.461782362632995,-0.867  
179611406798,0.385843605646486,0.530107436237116,-0.254154726431138  
"Akr1c18",571.188659029245,3.35416795276357,0.85578833013948,3.9193896  
8391505,8.87734824560276e-05,0.000900904965479376,23.5197972683403  
"Net1",6861.69256304541,0.439701509158732,0.307675661076692,1.42910722  
16113,0.152973418196338,0.272216455963512,0.572121019811669  
"Tubal3",0.366389463895641,-0.388130839671804,3.12953098703514,-0.1240  
22047162892,0.901297818718233,NA,NA  
"Tshz3",327.233391567284,-0.569708232979831,0.358314250606177,-1.58996  
81132303,0.111841992767304,0.214529776190546,-0.876955719161411  
"Gdi2",15862.8865973349,-0.136829349931524,0.179792507425098,-0.761040  
334167027,0.44663297640771,0.587796616110073,-0.0727075975609087  
"Rgs6",415.499508554722,1.28559366314876,0.366986303394755,3.503110746  
25009,0.000459858227477898,0.00323576893517288,7.37093672347699  
"Dpf3",71.9518447508901,0.320279733697629,0.374051420020344,0.85624520  
2010487,0.39186216470206,0.536365636178362,0.199514798980139  
"Dcaf4",655.218658510723,-0.403270401709445,0.168460804891448,-2.39385  
299131927,0.0166724297282854,0.0500275522994935,-1.20786799803676  
"Papln",160.826426683897,-0.793190557295636,0.385023948567282,-2.06010  
706670894,0.039388306461104,0.096802738698987,-1.85216340078316  
"Numb",2093.28979242859,-0.0919260031310711,0.162111360172729,-0.56705  
4665589903,0.57067704204142,0.697376796331572,-0.0331328357131327  
"Acot2",1472.54056167355,0.629925941129974,0.290493591662139,2.1684675  
9863335,0.0301231272964189,0.0789330380359596,1.59947985863973  
"Acot3",487.545740996715,2.27074498151337,0.656014625708883,3.46142432  
275748,0.000537325165701579,0.00365936642712168,12.7399358192428  
"Fam161b",233.913314716937,0.186599988497842,0.196628045894236,0.94899  
9862401172,0.342620682060585,0.487123965204703,0.134209548679686

"Coq6",1202.72956042547,-0.386131826175689,0.338909436563945,-1.139336  
30792495,0.254562910193399,0.395223739363557,-0.358447427496435  
"Entpd5",10746.3011548659,1.03982167638969,0.331662006459789,3.1351847  
8492277,0.00171745891221691,0.00892035531976702,4.90735469517046  
"Aldh6a1",20892.1511911655,0.746003737847735,0.502585695512036,1.48433  
141752613,0.137721019368223,0.251195924755997,1.03062062636723  
"Vsx2",0.144352309981214,0,4.78471990596382,0,1,NA,NA  
"Abcd4",2094.03139868358,0.410937505112986,0.190733493634681,2.1545114  
9812246,0.0312000812455436,0.0810362573765298,1.0326278448254  
"Isca2",1924.63270635662,0.0596260382689677,0.27545884522537,0.2164607  
86438657,0.828628588443125,0.890759742941011,0.00689757210518513  
"Npc2",13070.7499777434,-1.33198372211531,0.407278833675778,-3.2704467  
1114841,0.00107377771038986,0.00621815200391489,-6.7668536228585  
"Fcf1",1921.89624102639,0.223947826729637,0.172070347357435,1.30148994  
390323,0.193090804417674,0.323332575106133,0.252853632951369  
"Ylpm1",2478.48156627622,0.106978422584374,0.139341553287658,0.7677424  
29019193,0.442640223602107,0.58408570699955,0.057523105335373  
"Mlh3",809.048229927601,0.504025826477455,0.136467373153265,3.69337970  
557541,0.000221293216293014,0.00183373358745482,3.1760689371159  
"Tmed10",7783.40826740575,-0.159349276149525,0.180801463255985,-0.8813  
49482907189,0.37812869108202,0.523177036858622,-0.103232097209588  
"Fos",976.958343362158,0.196210559188107,0.385975836707443,0.508349333  
113378,0.611208378580208,0.730856185793996,0.0615195790978501  
"Erg28",1424.29407154968,0.144439957749811,0.187945860650898,0.7685189  
62054198,0.442178929668655,0.583643559123388,0.0777758367831237  
"Tgfb3",547.714277878934,-1.96030089749601,0.280350589317151,-6.992319  
5177535,2.70378227172565e-12,1.50623847811733e-09,-39.8208670480096  
"Gpatch2l",831.689388258447,-0.294504683535504,0.140564251634947,-2.09  
516061238919,0.0361567173077156,0.0906731132016435,-0.706956844305535  
"Esrrb",509.576649004723,2.27991519523726,0.577333586799036,3.94904306  
170374,7.84642370326184e-05,0.000818563774029959,16.2055442976737  
"Vash1",81.4143978288804,-1.44186717471521,0.396322270649989,-3.638117  
9698796,0.000274637629834217,0.00215488310121029,-8.85309156313572  
"Angel1",386.121524619924,0.154663062885376,0.151886671022265,1.018279  
36476864,0.308545212034074,0.45347736660006,0.122309084223596  
"Ccnk",1400.44997511884,-0.222422245325373,0.136644262128599,-1.627746  
68954665,0.103578608633206,0.202626237697427,-0.355073135459694  
"Cyp46a1",259.205516263718,0.666613776718984,0.311773156274175,2.13813  
717859905,0.0325056112359204,0.0836311216837734,1.65409513489501  
"Hhpl1",149.227028994544,-0.869828065354554,0.329692814307106,-2.6382  
9852398396,0.0083323196232798,0.0293771536893514,-3.06835154715136  
"Evl",1994.89489179758,-0.538879460988312,0.256545412057519,-2.1005226  
9758576,0.0356828861150777,0.0897967105668282,-1.29881101400516  
"Degs2",1153.20458418901,1.18335598385365,0.502426432653927,2.35528210  
09096,0.0185086485795955,0.0541292302887229,3.45111683412499  
"Yy1",3894.45209478332,-0.0864730052180692,0.0881827264278643,-0.98061  
1608655651,0.326784307491041,0.471658925713252,-0.0649843916161803  
"Slc25a29",235.900193185849,0.0835047905625116,0.188525688787729,0.442  
935873086952,0.657812119073173,0.767155361531209,0.0221342758650628  
"Wars",2205.73504336701,-0.31897067372845,0.154470972530745,-2.0649230

6290726,0.0389302805333457,0.0960231005489151,-0.747401392615484  
"Hsp90aa1",33543.0994179292,0.739024872551518,0.241122369539197,3.0649  
3700258442,0.0021771585086169,0.0106712510309231,3.3553221844783  
"Zfp839",1221.63832355521,0.343721126843159,0.128462675000858,2.675649  
77018315,0.00745845402985775,0.0270407096828126,1.24097480624378  
"Fdft1",2389.65907987101,-1.09264779974138,0.405548679285407,-2.694245  
73559619,0.00705481305279822,0.0259146090624453,-3.99138604584923  
"Tecpr2",715.326638241692,0.0439616393380189,0.172542857021762,0.25478  
6782233902,0.798887784690097,0.871619608633402,0.00604042503217907  
"Cinp",831.65862128332,-0.0735581300133853,0.154841064688266,-0.475055  
697669585,0.634747274471978,0.749472235630487,-0.0212131353219824  
"Traf3",1430.30768892398,-0.593107095879597,0.153270406034503,-3.86967  
785383228,0.000108979256734322,0.00106084750264893,-4.06200495176591  
"Amn",4570.48397328874,1.94113148228181,0.729013767249902,2.6626815150  
617,0.00775207469658727,0.0278053628465892,6.95415472046446  
"Cdc42bpb",4571.50598833218,-0.0753644144972396,0.116705354551845,-0.6  
45766552757094,0.518430552189027,0.651731715446914,-0.0322651850492474  
"Exoc3l4",1120.89971322308,0.136833177391802,0.305973313122671,0.44720  
6248137538,0.654726150498249,0.764834370763577,0.0366844244339856  
"Tnfaip2",3541.96380243307,-0.821788735439418,0.33670053016383,-2.4407  
1114185522,0.0146583742938502,0.0454708124840472,-2.53988982419205  
"Eif5",15346.0393659727,0.421965985928185,0.239397707899135,1.76261497  
919593,0.0779654489635027,0.163090904826776,0.765213177165072  
"Ppp1r13b",1088.08036726582,-0.0891814665816951,0.134381699508929,-0.6  
63642943254854,0.506918865402409,0.641478714798557,-0.039594722951086  
"Zfyve21",1498.96464204804,0.204774642305786,0.226195507484699,0.90529  
9334115368,0.365306829093236,0.510262379372442,0.137778566854885  
"Xrcc3",193.4860141711,-1.12684369086693,0.530442611417167,-2.12434609  
628434,0.0336412138340226,0.0858443119141177,-2.76664911026942  
"Klc1",4585.84302495816,0.0362475264920115,0.195043591483828,0.1858432  
06722416,0.852567720635088,0.90617957840098,0.0035710259283695  
"Atp5mpl",6757.47824296727,0.791109710383814,0.367757769889056,2.15117  
062141875,0.031462734978791,0.0815013161440769,1.98341972176307  
"Kif26a",432.479128029078,-1.25297348044624,0.412719548885197,-3.03589  
56434961,0.00239822352872268,0.0114693554974331,-5.59838141285364  
"Gpr132",758.127668084539,-1.32237597889738,0.384105467236105,-3.44274  
18813191,0.000575848646021983,0.00384122370856538,-7.35500797131517  
"Hecw1",0.821279713962594,1.67849260364871,3.4826017414323,0.481965130  
746874,0.629830716944854,NA,NA  
"Ggps1",1437.80489625719,-0.348464234826014,0.115952399540271,-3.00523  
521900029,0.00265375537637921,0.0123394484712482,-1.53148426733548  
"Gng4",83.1900223771122,0.918363499928521,0.429671946296045,2.13735969  
463495,0.032568747010979,0.0837764418496133,2.27717728856947  
"Gpr137b",5674.01784093297,1.34884900795424,0.322242744283428,4.185816  
53701366,2.84142788394201e-05,0.000374086163950717,10.6438004366357  
"Mtr",1501.2825762378,0.0449737145251035,0.128962976172239,0.348733534  
693229,0.727289365839181,0.82078416710843,0.00888208799281721  
"Ryr2",52.7039886577076,0.40948934070022,0.563335625400298,0.726901197  
504139,0.467286483555396,0.605720040137108,0.205292313053153  
"Amph",98.4971380479473,-0.83931516957554,0.435957513987557,-1.9252223

9586744,0.054201541417803,0.123581354386139,-1.75488682232031  
"Gli3",154.749921500098,-1.2412603134632,0.295547079065335,-4.19987339  
204527,2.67064273232801e-05,0.000356658849280353,-9.85403152763452  
"Sfrp4",423.330162367065,-2.05248690868216,0.553731193102038,-3.706648  
52233444,0.00021002009243594,0.0017582532255543,-13.0198161611215  
"Aoah",1720.25483427731,1.27319388730469,0.454415886860175,2.801825209  
28555,0.00508143967421586,0.0201418806196099,4.97176358682999  
"Trim27",1773.09965695778,-0.11466193604371,0.121833054690472,-0.94113  
9794409817,0.346633224795075,0.491394687026469,-0.0814681805288631  
"Zkscan3",4903.93735367269,0.145947460723391,0.153333577865368,0.95182  
9747633865,0.341183332806739,0.485753386131128,0.10538197988661  
"Slc17a1",13246.5869065232,2.36568629920632,1.02183083382691,2.3151447  
5869403,0.0206050112333592,0.0587621045821322,6.70496558335699  
"Slc17a4",118.300648375792,1.16923430147637,0.501262504321449,2.332578  
82126879,0.0196702615689106,0.0567017681949467,3.35564384746838  
"Scgn",1.32113291824061,-1.39343550794618,2.44215705388094,-0.57057571  
532175,0.568287284050235,0.695266704173401,-0.506457735317717  
"Carmil1",1126.49091795552,0.293832402390945,0.199441476806017,1.47327  
630689746,0.140676546676598,0.255223631923683,0.401261974453065  
"Mrs2",3310.65009755557,-0.0382559710604618,0.178113261044569,-0.21478  
4518772519,0.829935323451643,0.891437692897741,-0.0043963660300007  
"Gpld1",418.230062568832,-1.39381203861223,0.437763612793348,-3.183937  
62724679,0.00145286314277961,0.00784707079166669,-6.75666409591395  
"Prl7d1",0.586338482333666,-1.66206842211623,2.78709062415825,-0.59634  
530994779,0.550944567785344,NA,NA  
"Irf4",481.171906247828,-2.49183529078283,0.630421251347871,-3.9526511  
6056156,7.72900730332249e-05,0.000808477384121147,-17.7427589785605  
"Exoc2",1244.92664296195,-0.201705199258344,0.118585866950791,-1.70092  
106626876,0.0889578102444263,0.180413915555006,-0.345420463772119  
"Tfap2a",590.11885089794,0.578562951183421,0.264061676836652,2.1910144  
5584366,0.0284507463698879,0.0756075579555778,1.49396469008789  
"Gcnt2",2333.47427336498,0.511287829844396,0.123179184527692,4.1507648  
5369533,3.31366071793255e-05,0.000419839241111228,3.97558942595094  
"Tmem14c",4038.16000189886,0.0241448076908401,0.326861444878233,0.0738  
686317067308,0.941114915907269,0.963500059352058,0.000897769853855804  
"Gcm2",0.269028506467732,-1.57852747769588,4.76142694245881,-0.3315240  
361287,0.740248688333899,NA,NA  
"Mak",29.5256805250392,-0.497125974587043,0.554448513659046,-0.8966134  
13761889,0.369925237874665,0.514979457952321,-0.329906848789652  
"Elovl2",643.10914316039,1.93097882276282,0.630536719697482,3.06243675  
021696,0.00219542866895024,0.0107384496840819,8.75491229011988  
"Nedd9",1970.73904828309,-0.47647531313562,0.150807770316692,-3.159487  
81773669,0.0015804670763655,0.00837189478915665,-2.27892188307187  
"Hivep1",1307.70855794184,-0.971090102414391,0.202742543310166,-4.7897  
6975704978,1.66972790748634e-06,4.07463763957055e-05,-9.81591824747742  
"Edn1",858.552265653325,-0.692546148786955,0.394695913483277,-1.754632  
17410863,0.0793222444049439,0.165237726646111,-1.24683936144408  
"Tbc1d7",490.380314462412,0.0133152368396544,0.171977388837479,0.07742  
43458960611,0.938285973686634,0.961765319889706,0.00051909195560612  
"Mcur1",5857.98340225378,0.722019309032006,0.238144450123545,3.0318544



4236654,0.00243056377851956,0.0115757529442048,3.21937047620305  
"Cap2",185.3300673812,-1.72675910222296,0.376721037497858,-4.583654562  
25093,4.56918852145055e-06,9.27055544133639e-05,-16.0348269093598  
"Nup153",1829.80160294601,-0.319330108575737,0.206808885167991,-1.5440  
8311962199,0.122568197667786,0.230190205945529,-0.469047815854216  
"Kif13a",1393.39056191713,-0.252794558443411,0.162360205212176,-1.5569  
982688372,0.119470896428974,0.22578690884677,-0.376199661597249  
"Tpmt",2913.78481109265,1.64061946921718,0.346774293329063,4.731087340  
60733,2.23320404786169e-06,5.21473203894698e-05,16.1788667844973  
"Dek",5570.05985039771,0.357171733545927,0.183305103552627,1.948509488  
40812,0.0513540306023845,0.118770599889683,0.760976300933705  
"Id4",2115.73753234499,0.49512877675318,0.238742163638549,2.0739058790  
7545,0.0380880529442087,0.094442484103661,1.16838719326158  
"Barx1",0.190062432325283,0.43663188201043,4.78471990596623,0.09125547  
37981588,0.927289597068987,NA,NA  
"Susd3",1552.20389535671,2.08123078088636,0.500292153278927,4.16003082  
847877,3.18204640638544e-05,0.000407912825980955,16.2428762784449  
"Ippk",592.152019120932,0.0794171682843833,0.136734378866525,0.5808134  
64343942,0.561366179523356,0.689516725650283,0.0295244699123783  
"Aspn",250.591083973892,-1.7932148065481,0.577159191563974,-3.10696742  
382095,0.00189017226443977,0.00956020202647126,-8.3387114123618  
"Ogn",1996.10279317096,-1.63677446786955,0.27509077087212,-5.949943223  
03321,2.68235520401241e-09,3.09850777959792e-07,-24.530625412956  
"Cenpp",29.6569034241026,0.244352137370154,0.38101783276727,0.64131417  
575777,0.521318580933204,0.65472555947877,0.103492690285332  
"Nol8",1344.58120000232,0.28274360304907,0.12518039245229,2.2586892204  
9299,0.0239027234715263,0.0660134989019576,0.768467715966736  
"Spin1",3959.52807399021,-0.192463883520034,0.135515509956515,-1.42023  
509767844,0.155539248898938,0.275750525098336,-0.24794327557446  
"Nxn12",72.0581058245672,-0.0746661570157446,0.36995240576937,-0.20182  
638591163,0.840052453028768,0.897645789946562,-0.00806243160609371  
"Wrnip1",1751.14965416919,0.0169313907292862,0.108286010551275,0.15635  
8061794778,0.875750792367545,0.922395686559118,0.00136773444358903  
"Serpnb9b",16.7539872357485,-1.73627479534439,0.606412246199528,-2.86  
319217038553,0.00419396114011583,0.01738759394216,-7.03538255186845  
"Serpnb9c",0.239211507279182,-0.0926397567699961,4.78471990596078,-0.  
0193615840824007,0.984552656120711,NA,NA  
"Ripk1",1535.48309100791,0.0353151567377692,0.152165618116554,0.232083  
680761044,0.816473019731989,0.882692059184005,0.00440658581245434  
"Pxdc1",564.899147747745,-0.839595075317351,0.266441390521546,-3.15114  
357297823,0.00162632524718593,0.00857029450530573,-3.9960134530484  
"Prpf4b",5783.23447732241,0.235628462319111,0.20993433934783,1.1223912  
3456935,0.261696129747982,0.403277737435626,0.2139812235602  
"Fam217a",246.726840844026,1.23632554679773,0.229418735637493,5.388947  
60866987,7.08714605894925e-08,3.52513198615797e-06,15.5227999848763  
"4933417A18Rik",0.142425137392067,2.57912268336951,4.72883040948399,0.  
545403928674817,0.585475739019112,NA,NA  
"Eci3",6920.08234128948,2.21357936702172,0.711108365227634,3.112858004  
85995,0.00185285139922802,0.00941294856231057,10.3278287003058  
"Eci2",5025.15983084517,0.625478770212885,0.211432858264916,2.95828555

384324,0.00309355404260873,0.0138344304410057,2.67742119290649  
"Rpp40",368.567816369769,0.976091226063154,0.289645334781113,3.3699532  
1122915,0.00075180947963377,0.00471646757847466,5.22862314047783  
"Fars2",1401.22667997004,1.06381648750098,0.258276577311682,4.11890423  
271792,3.80678303884193e-05,0.000468294357674069,8.15565707106188  
"Ly86",1270.26894681928,-1.26681228129268,0.416546035552222,-3.0412299  
5580367,0.002356138093756,0.0113215439518149,-5.67664641650872  
"Ssr1",6386.56629561696,-0.165352718348359,0.108340138746264,-1.526236  
90777819,0.12695087491438,0.236056471398111,-0.238717109716835  
"Riok1",1247.29970279711,0.193662228039808,0.263888219675507,0.7338797  
77876963,0.463022012815088,0.602204477271011,0.0982173924235229  
"Snrrp48",2831.47398333859,0.409736309282411,0.22622986154356,1.811150  
42234828,0.070117570171692,0.150286070485616,0.776538261967486  
"Slc35b3",1225.65664344041,0.205753108106218,0.101487501468167,2.02737  
386505426,0.0426241926289999,0.102897212847041,0.467887654573716  
"Shc3",11.0765702353576,0.111601423297504,0.556862005197637,0.20041127  
2911132,0.841158943824857,0.898286618835418,0.0119710479758037  
"Sema4d",2874.52447333893,0.540828801935151,0.37155820625348,1.4555695  
254008,0.145511657558545,0.261878004345256,0.724643810852236  
"Gadd45g",3395.56639624912,0.731279662954889,0.402780636906592,1.81557  
799940735,0.0694351309914054,0.14920059335138,1.39123295067444  
"Fbp2",479.340181705204,0.878015169440878,0.302448842331385,2.90302043  
371309,0.00369582522178247,0.0158271909014528,3.64027361109625  
"Syk",1574.28667632055,-1.30286875779926,0.28596488594012,-4.556044542  
0284,5.21258874103214e-06,0.000102558077974414,-11.9669554707385  
"Aoep",6601.51402515251,0.139139199359634,0.242608784170892,0.5735126  
19648701,0.566297656983776,0.693790242907299,0.0508672887680295  
"Auh",3246.21854943811,0.743053188101828,0.277690159975292,2.675835500  
14139,0.00745432227131852,0.0270307561179409,2.68300155025955  
"Fancc",864.815362452752,-0.0289447717648646,0.150935725625264,-0.1917  
6885820079,0.847923265738561,0.902821162359775,-0.00295904698541143  
"Ror2",214.959029486952,-0.371118150807197,0.400938677757788,-0.925623  
222191084,0.354641820783464,0.499710421278564,-0.257454497990741  
"Ptch1",1473.44482467509,-0.441235593436646,0.190031753479955,-2.32190  
455203682,0.0202380756584751,0.0580041157120311,-1.25630420925213  
"Sptlc1",2826.80186715471,0.11539194312307,0.176905716162577,0.6522793  
36282296,0.514220987787022,0.647901830040152,0.0500819600823557  
"Msx2",129.074854410823,-2.8110200081948,0.751291375283719,-3.74158429  
162485,0.000182863822570833,0.001579042875326,-18.1337112655946  
"Ercc6l2",916.712552931807,-0.262405791675791,0.164927945385019,-1.591  
03292691371,0.111602165754102,0.21417510116865,-0.404357187913304  
"Sfxn1",9293.19856319996,0.55302516889253,0.349405238326112,1.58276152  
796648,0.11347582853997,0.217108400046349,0.844667698386785  
"Hbp4",3459.34961144349,0.370957668831634,0.179474768375143,2.0669070  
766329,0.0387429107994165,0.0956865787173977,0.870517916093446  
"Ctsl",23684.1924375303,0.309510361033788,0.231101847202412,1.33928120  
774691,0.180479144115035,0.308196037130405,0.364299641958322  
"Drd1",25.8819402712671,-0.127904664573782,0.504427343926607,-0.253564  
098207157,0.799832335758786,0.872162120833555,-0.0174947941325324  
"Zfp346",1074.5279152637,-0.225908363000498,0.129473858529685,-1.74481

834067457,0.0810164952219498,0.16787613438279,-0.403139995038414  
"Prxl2c",2616.63727156069,-0.0194960578341335,0.167425018001418,-0.116  
446502839667,0.907298682106649,0.943127331475567,-0.00114157172957999  
"Cdk20",479.079584545844,-0.322901039299457,0.200624172597086,-1.60948  
222300182,0.107510939072773,0.208070169916272,-0.506915851545474  
"Lman2",6872.47299579907,-0.027874405178774,0.167959206350473,-0.16595  
9376591777,0.86818891954925,0.91740448479142,-0.00240296350211071  
"Mxd3",67.1060275140862,-0.707224047305566,0.449316700754633,-1.573999  
0214425,0.115487675668297,0.219878791151299,-1.07121729518717  
"Prelid1",10636.4759937575,0.861122629850901,0.160115748561535,5.37812  
574707452,7.52652430992437e-08,3.66880427487263e-06,10.7775049297069  
"Nsd1",5100.43331360728,-0.0106259802193724,0.124788051261501,-0.08515  
22250083465,0.932140371485622,0.957529791013469,-0.000461151018985964  
"Slc34a1",124078.55760226,2.22777586776242,0.881554543296556,2.5270992  
9828243,0.0115008980238872,0.0378088871471509,7.29643623765929  
"F12",4.04582781456314,0.803290807723905,0.943573390627343,0.851328381  
769891,0.394586963147304,0.538908617016278,0.496601819150075  
"Pdlim7",2654.52417083647,-0.889987151576864,0.27693928872571,-3.21365  
435605758,0.00131057334034892,0.00722668523476335,-4.38761424890691  
"Ddx41",2403.33498313192,0.213921068804261,0.139112310540943,1.5377580  
0267009,0.124107795717168,0.232410084603664,0.312164717897202  
"Fam193b",10834.9978370708,0.480228395970228,0.273632267197335,1.75501  
376679345,0.0792569529871169,0.165137002494422,0.864881655635307  
"Pcbd2",1106.47053893298,0.583229696631662,0.245209835617112,2.3784922  
6220419,0.0173836017646542,0.05162916484497,1.72849951282795  
"Txndc15",2568.76888598113,-0.00518806332170352,0.160241447337984,-0.0  
323765380798189,0.974171772577136,0.984077077375299,-8.32738862525278e  
-05  
"Catsper3",14.2177978279739,0.183233544612483,0.545542719007187,0.3358  
73870603466,0.736965981804211,0.827995797237524,0.0345848185667796  
"Ddx46",5273.40907983437,0.325352795094285,0.157746079525933,2.0625095  
4744518,0.039159249529355,0.0963805598624973,0.761146843386859  
"Caml",1805.33823277151,0.385280035795812,0.199183436191112,1.93429756  
59188,0.0530765523462841,0.121636885007974,0.811675240161829  
"B4galt7",864.84490445536,-0.183122096596833,0.0984626198709013,-1.859  
81336711264,0.0629119355127232,0.138355167902896,-0.362202911859884  
"Pitx1",4.73571519338605,-1.97568237352926,1.44058893700498,-1.3714407  
5091729,0.170237601437059,0.294681529902323,-2.41400739420855  
"Cxcl14",3008.1609396531,-0.804358319084658,0.41282975247713,-1.948402  
00895941,0.0513668796333968,0.118770599889683,-1.71373476900178  
"Slc25a48",1040.28887835768,0.119449055364333,0.419417276944019,0.2847  
97651242859,0.775799171778959,0.854965357073935,0.0187169895690608  
"Zfp729a",961.029709864443,0.506639580702342,0.278464567560123,1.81940  
411716099,0.0688497990511522,0.148269646774836,0.967034481205518  
"Zfp369",1660.51268942141,0.368023979303209,0.129937159221691,2.832322  
80517469,0.00462111706373133,0.0186624980340997,1.46519150083841  
"Ptdss1",3109.35902731008,0.11924223943493,0.144721792617154,0.823941  
037400879,0.40997306140619,0.553513680875572,0.0705280563107123  
"Mterf3",1875.87600485589,0.26543151686056,0.184334412988843,1.4399455  
4547244,0.149882805943851,0.267816619345052,0.349693492138372

"Uqcrb",9557.90986860069,0.760810389417396,0.318531450567698,2.3884937  
8314591,0.0169175945493707,0.0505221716225503,2.27127996810795  
"Fastkd3",476.384122374011,0.564063198205857,0.246348727183261,2.28969  
398240992,0.0220390624977721,0.062115877505285,1.56739266876309  
"1700001L19Rik",13.6641468694104,0.676510176494809,0.632217217172727,1  
.07005971700701,0.284592429759181,0.428724653901299,0.572963798479706  
"Adcy2",49.1664302832389,-1.88645982670489,0.367972365933112,-5.126634  
50126523,2.94967354169667e-07,1.05527953607342e-05,-21.6171690955726  
"Cetn3",2345.74699759512,0.0442682396344902,0.194317765781306,0.227813  
650782254,0.819791113930046,0.884526984638815,0.00543181293843749  
"Lect2",8.54776257160669,-0.65952117586,0.824710742614485,-0.799699993  
926593,0.423884636474977,0.567060215573866,-0.374139623145833  
"Smad5",3075.81318803604,-0.34533729603153,0.0870784928472981,-3.96581  
618192587,7.314521852432e-05,0.000776698269304374,-2.47277341500246  
"Trpc7",0.63713753980554,-1.11484908613566,2.53449216226137,-0.4398707  
96499505,0.660030688169835,NA,NA  
"1700067P10Rik",0.120217854293175,-0.0675307986870953,4.78471990596051  
, -0.0141138457452796,0.988739154248813,NA,NA  
"Hnrnpk",17126.5202214069,-0.19797401444772,0.125767875648712,-1.57412  
227428163,0.115459183962083,0.219846012587176,-0.299896564616829  
"Ccnh",1181.12582514754,0.162630177298469,0.180632723345561,0.90033618  
6524455,0.367941369209404,0.512986829949586,0.108556473859005  
"Rasa1",2282.33382066495,0.122422601452334,0.269151331205126,0.4548467  
24718717,0.649219512655576,0.760908996018178,0.0334509368467566  
"2210016F16Rik",2333.11385424331,0.175866089127987,0.212181660184318,0  
.828846795595886,0.407191104692922,0.55108018041942,0.104794199248924  
"Gkap1",1963.9527546279,0.770857573323073,0.15042569446539,5.124507326  
10999,2.98316750921718e-07,1.05948634052307e-05,8.83028239276022  
"Slc28a3",20.7125600580422,0.320677217331514,0.432634257862531,0.74122  
0121855004,0.458559984845778,0.598340532993574,0.164698290455223  
"Naa35",1989.07488960625,0.511009203023764,0.290141828091222,1.7612393  
4417032,0.0781979014609348,0.163435501683454,0.925609800939113  
"Golm1",1141.98861558638,-0.602179824986652,0.310501219573427,-1.93937  
990264237,0.0524550958646691,0.120609606034118,-1.27372856534848  
"Agtpbp1",2110.85574332442,0.250410115512928,0.268131256487795,0.93390  
8708716046,0.350350986193401,0.495306507749544,0.175932763459222  
"Dapk1",3777.40825778456,-0.234602602890034,0.172081082280642,-1.36332  
593787054,0.172779810953205,0.298208440644914,-0.283860368729055  
"Slc6a19",5202.66118908871,1.92041440294057,0.839451995040626,2.287700  
0880171,0.0221549925807628,0.0623614905932891,5.3287799658401  
"Nkd2",1057.00366519811,-1.90028233431347,0.391984169908645,-4.8478547  
864735,1.24803699945967e-06,3.27954520424053e-05,-19.6208345120207  
"Trip13",110.737128320784,-0.648884303452107,0.37431455807383,-1.73352  
676099795,0.0830020852421212,0.170908323241829,-1.14633717121667  
"Cep72",229.162284226631,0.446560385958653,0.302242749391774,1.4774891  
6014462,0.13954456186606,0.253691362915099,0.612518684452497  
"Tppp",413.868610046934,-2.50015836180752,0.629844091343986,-3.9694876  
8142381,7.2027330243307e-05,0.000767845207809732,-17.9309417522495  
"Ahrr",43.276524571061,-2.27030005983008,0.636752715254237,-3.56543443  
858517,0.000363253963183509,0.00268488467556939,-13.4404431219761

"Pdcd6",3123.77978256432,0.256381173969333,0.179505392342556,1.4282644  
6951562,0.153215750489451,0.272498467850344,0.333326878363251  
"Sdha",23675.7813993269,-0.0349537316914928,0.446107361483419,-0.07835  
27345867212,0.937547470222967,0.961159922940607,-0.00138467358370306  
"Ccdc127",1870.79721163843,-1.21188818709103,0.264563026440663,-4.5807  
1637369493,4.63385919436367e-06,9.35310419996925e-05,-11.2429499056088  
"Lrrc14b",76.3490324526629,0.0575929555116201,0.242260279200673,0.2377  
31730936848,0.812089171368829,0.880220524196152,0.00734787094063143  
"Erap1",2088.18111180301,-0.761861758943923,0.213853174156412,-3.56254  
59474672,0.00036727560088344,0.00270947395612006,-4.50336544761033  
"Cast",5135.53045378464,-0.736191863145538,0.219974889329008,-3.346708  
64202343,0.000817771130216073,0.00504266334501992,-3.89432310039822  
"Pcsk1",3.35241917954593,-0.235945881796085,0.901476602767645,-0.26173  
267400585,0.793527548172769,0.867421659150791,-0.0335586010992988  
"Rhobtb3",469.018252966899,-0.662523789874965,0.173278956373603,-3.823  
4521013995,0.000131596165479197,0.00123052468075979,-4.43911784257177  
"Spata9",6.19054827692065,-0.434269415320409,0.733071034832127,-0.5923  
97454934032,0.553584470204851,0.683281002725466,-0.165391107222075  
"GlrX",1811.34489460192,0.561952265766705,0.138607246497449,4.05427768  
004212,5.02894515470225e-05,0.000581514980048513,4.1864734757983  
"Arsk",891.656105638278,0.0827122200503622,0.122895935550463,0.6730264  
89280433,0.500930438820343,0.636088680958584,0.0374204384361989  
"Srd5a1",2469.7945553051,-0.345388504529178,0.233650067599079,-1.47822  
985064071,0.139346266598629,0.253425380667855,-0.474109914861657  
"Nsun2",3040.64828891051,-0.109476977789261,0.0995824400133419,-1.0993  
6026647463,0.271610954652955,0.41412809043458,-0.0965127092433427  
"Mctp1",84.4124857864242,-1.42348729376442,0.362409793639611,-3.927838  
92363562,8.57125836355561e-05,0.000877743674225879,-10.0187255659985  
"Slf1",544.026263138419,0.27157229989682,0.143495142396107,1.892553959  
4028,0.0584172114059626,0.130910336859408,0.552172380422091  
"Med10",1753.92215745016,0.0814509603535478,0.12821632290934,0.6352620  
20508421,0.525257539412505,0.65797014208407,0.0340950238384691  
"Irx4",35.3821628177564,1.18805891736721,0.639783837730806,1.856969256  
3367,0.0633155281644503,0.138991912649229,2.34444362551914  
"Ndufs6",5285.90034447451,0.634759840737066,0.395885058325577,1.603394  
28677057,0.108847631601909,0.210129813957825,0.9902442531389  
"Mrpl36",2149.2493721054,0.357745487270615,0.167550268750206,2.1351531  
6889144,0.0327485008034427,0.0841025214176236,0.885677203862486  
"Lpcat1",1373.30890152598,-0.847882307119945,0.224901404976467,-3.7700  
178316301,0.000163235884023654,0.00145199510341843,-5.54075548978165  
"Slc6a3",2.18619118578542,-0.181285901425897,1.02279676172878,-0.17724  
5282943094,0.859315728062625,0.910990542940684,-0.0168999725769657  
"Clptm1l",4815.50439781658,0.0548504832569099,0.0968835054790936,0.566  
148829830957,0.571292611545362,0.697652795512507,0.0197480239482194  
"Tert",180.669748603598,-0.355281417799006,0.403684470571486,-0.880096  
817437745,0.378806863076287,0.523605289682507,-0.229873167717581  
"Slc6a18",18270.1605638733,2.08233107365837,0.734704776329406,2.834241  
91695298,0.00459345441728137,0.0185882986457206,8.29855369106795  
"Hapln1",59.1180051925904,-0.712164792366006,0.547729222625894,-1.3002  
1324944429,0.193527890787749,0.323730852314648,-0.80320994142206

"Vcan",286.656207173816,-1.87288301386697,0.549617881814312,-3.4076093  
1519277,0.000655346523924032,0.00425081388006346,-10.2271489153814  
"Xrcc4",469.766694524402,-0.053720323568061,0.24873253624111,-0.215976  
262614824,0.829006250593914,0.891010752359036,-0.00619926000730552  
"Atg10",554.734351856614,0.0365976227434948,0.295231622054015,0.123962  
407850738,0.901345039617113,0.939654974297799,0.00227792825518104  
"Acot12",2836.67795854994,2.17341635933257,0.83749591097818,2.59513668  
167533,0.0094553309424463,0.0323950171702369,7.45427619081743  
"Zcchc9",1221.22440047567,0.134053885557594,0.104430375964781,1.283667  
55667722,0.19925830083206,0.330678215135204,0.148345308118834  
"Ckmt2",0.118149636523694,0,4.78471990596588,0,1,NA,NA  
"Cd180",327.45342017721,-1.50129222248206,0.504148625388256,-2.9778762  
5886292,0.00290253141446248,0.0131919714496945,-6.49781321558663  
"Slc30a5",3426.00285534168,0.672586304420633,0.1353686083278,4.9685544  
7307208,6.74538521270177e-07,2.00796215079785e-05,7.2745623899654  
"Rad17",861.895687174821,-0.0295227883721389,0.116950907479844,-0.2524  
37445833646,0.800702959515092,0.872738410179888,-0.00401862461570872  
"Marveld2",878.400647692264,0.289230047630979,0.175554384749093,1.6475  
239171289,0.0994504043395976,0.196482316730517,0.470630171160781  
"Ocln",984.127757284441,0.363069984080969,0.33704234626662,1.077223642  
97144,0.281380365200334,0.425364735670346,0.31035522735016  
"Gtf2h2",1004.51899665383,0.719157258395286,0.15140084711461,4.7500213  
6448343,2.03395159039122e-06,4.81871058438007e-05,7.14872453741084  
"Naip1",60.2257499980512,-1.25151731550253,0.512919504260037,-2.439987  
76632218,0.0146877592992294,0.0455204433586897,-3.86668007517456  
"Serf1",468.993589067154,0.170635836732532,0.15770394943832,1.08200103  
637398,0.279252067438627,0.422979087640195,0.14682062630573  
"Smn1",838.585341381352,0.228024330649299,0.0908338582131163,2.5103450  
9746689,0.0120613226146056,0.0391040353075458,0.739147620174641  
"Mccc2",2977.59263695088,0.73838604914218,0.388715555711979,1.89955364  
093865,0.0574917209028792,0.129442676000501,1.50964294242419  
"Cartpt",2.7745221043703,1.53150743460721,1.34534890596362,1.138371932  
97471,0.254965208744154,0.395679054448705,1.41993997410237  
"Ptcd2",1187.77451127993,0.140231704847107,0.213701214513406,0.6562045  
29143236,0.51169253514046,0.645884705779031,0.0613000832496592  
"Btf3",12382.993681891,-0.103849282103308,0.231984173927675,-0.4476567  
53239059,0.654400937428157,0.764637710671433,-0.0278682807472626  
"Ankra2",1011.92724865799,0.0778275678666823,0.102343417067176,0.76045  
5045345982,0.44698263091824,0.587981074053183,0.04133114855156  
"Arhgef28",3206.49406202122,0.711844281019747,0.1685435084225,4.223504  
58752357,2.40532472153779e-05,0.000331676247670041,5.70283455093708  
"Hexb",9519.07581277806,0.662856674743076,0.284683443289258,2.32839910  
563245,0.0198909211070232,0.0572194127684771,1.8963415080859  
"Gfm2",2547.79351576184,0.463743952119972,0.174929587746144,2.65103209  
865762,0.00802462146447958,0.0285663086450813,1.64885427036464  
"Polk",698.043079041307,-0.0680620924621635,0.118153485159672,-0.57604  
8115467646,0.564582659797835,0.69234167929171,-0.0250247767421729  
"Col4a3bp",3261.45965121371,0.162366483680754,0.126849580879557,1.2799  
9227553554,0.200547852576767,0.332111604343622,0.178974011014691  
"Hmgcr",1615.33522377291,0.209168408290434,0.192635769518842,1.0858233

0692211,0.277557172787375,0.421086971289157,0.180913078761484  
"Poc5",574.453888931374,0.0736611789132351,0.147645398978843,0.4989060  
23639723,0.617845590299311,0.736323602054599,0.022546624684262  
"F2rl2",29.6723504311004,-1.27792214593102,0.56564486963778,-2.2592305  
0756096,0.0238690500574356,0.065948524588335,-3.47451795035191  
"Iqgap2",1843.80259631113,0.505222377553368,0.432089448442274,1.169254  
14257336,0.242301253047508,0.381039595232131,0.487464813728255  
"F2rl1",1346.6907216727,0.0702512598445632,0.332817885371722,0.2110801  
82082462,0.83282470424349,0.893005723896809,0.00794979332610251  
"S100z",1.45773071062102,1.1362689642311,1.32040792456333,0.8605438842  
74906,0.389489303762824,0.533679722049722,0.713530767244418  
"Crhbp",2.16147189364719,-2.14734615778181,1.23483448910287,-1.7389748  
8022213,0.0820391815347554,0.169471964717614,-3.81168494655938  
"Aggf1",2119.50991269781,-0.308868137982256,0.141397898024308,-2.18438  
988342781,0.0289336109715389,0.0765250932379314,-0.793833298512947  
"Pde8b",644.080246646217,0.384302000021413,0.449604845587694,0.8547550  
22755769,0.392686782577944,0.537192653245265,0.238804682686609  
"Ap3b1",2584.42987600338,0.382124566113544,0.134761225257384,2.8355676  
1511861,0.00457443308381125,0.0185469528525997,1.52370251330977  
"Scamp1",2417.85539756366,-0.134264266909935,0.184765332565263,-0.7266  
74560892046,0.4674253407798,0.605773299735762,-0.0672998907150471  
"Jmy",1629.4849468501,0.139916671823262,0.141162195448892,0.9911766488  
06936,0.321599330770023,0.466870951630847,0.10657486393563  
"Dimt1",487.645982931837,-0.29188306576576,0.165778218984959,-1.760684  
04856154,0.0782918940770011,0.163580727680387,-0.528439306231375  
"Kif2a",1254.05318080875,-0.455557644076041,0.151177660217059,-3.01339  
260987342,0.00258344456919927,0.0121290638599199,-2.0099889939667  
"Ercc8",282.180226819048,-0.0778539482099226,0.127007801553095,-0.6129  
8555882314,0.5398858884902,0.670726059780292,-0.0310944373193827  
"Elavl7",2396.62517333257,1.09484088225093,0.443082115060738,2.4709660  
9191921,0.0134748594738956,0.0426370062150508,3.45425879827151  
"Depdc1b",424.852787027945,1.36327222128726,0.581028149727432,2.346310  
1089453,0.0189603248308476,0.0551691409568523,3.94987884614304  
"Pde4d",804.262634908252,0.818088935839478,0.347350136390329,2.3552284  
8599133,0.0185113194976513,0.0541292302887229,2.38585897803359  
"Rab3c",262.683049350198,1.12238564565324,0.483131241354142,2.32314855  
588177,0.0201711732814271,0.0578634010065126,3.19842892871275  
"Plk2",1238.33535174086,-0.684357346745103,0.196826687970556,-3.476954  
03403566,0.000507144754383426,0.00350152564481871,-3.86973728811197  
"Thbs4",154.304088385402,-2.69450346530176,0.731866536846951,-3.681686  
93285295,0.000231695814848981,0.00189974978886687,-16.8838478788816  
"Serinc5",1387.58663242794,-1.10818168191747,0.241345517787725,-4.5916  
8122149329,4.39689611290287e-06,8.9958741248038e-05,-10.3239972187491  
"Mtx3",1424.57901279137,-0.0841181628162112,0.173364727986169,-0.48520  
9210623987,0.62752794913608,0.743892263634198,-0.0248871207124583  
"Zfyve16",1171.23789875486,-0.0366550442072209,0.106770372800155,-0.34  
3307260674543,0.731367319152242,0.823975318814203,-0.00709695547625012  
"Dhfr",1933.35055160239,1.75993913319491,0.360816713431343,4.877654132  
08829,1.07354953321551e-06,2.9440321798363e-05,18.3617007547583  
"Rasgrf2",196.319572345443,-1.01442819101776,0.331833444439844,-3.0570

4023514018,0.00223534268893807,0.0108906675428905,-4.58506229060734  
"Erbin",6512.91345502045,0.287965156059504,0.167598165182224,1.7181879  
9893429,0.0857623298126476,0.175327009006883,0.501376831780095  
"Nln",1407.90561537332,0.145194305571558,0.145871839214963,0.995355281  
409687,0.319563499822936,0.464665729102311,0.111282287114808  
"Trappc13",1563.94606128583,-0.128038217763957,0.175289333734706,-0.73  
0439297337613,0.465121705046635,0.603906352529865,-0.0645743003337023  
"Trim23",968.030867526815,-0.0910771424107979,0.177523645476257,-0.513  
042317075329,0.607921719816134,0.728087081878069,-0.0289019303753147  
"Ppwd1",740.097418555226,-0.0680118295256717,0.201773788635635,-0.3370  
6969565055,0.736064361388619,0.827573689214352,-0.0128717233414415  
"Cenpk",79.2766307195777,-0.933906126577992,0.448552946845647,-2.08204  
211597647,0.0373386229672079,0.0929674972052892,-2.21849899012073  
"Cwc27",1045.26892215185,-0.0447333690689697,0.112380514145297,-0.3980  
52717672512,0.690591326468027,0.792907177215498,-0.0103803387879765  
"Srek1ip1",1818.45049622312,0.646496711595734,0.133000186044185,4.8608  
7073127067,1.16870554397675e-06,3.10951183951186e-05,6.70964007774944  
"Rgs7bp",228.335853521424,-0.222732078852325,0.209732400858726,-1.0619  
8221133394,0.288243760877962,0.432321296122962,-0.186780053447527  
"Rnf180",286.347781384945,-0.953162751999492,0.430186174807744,-2.2156  
9824373243,0.0267121752700611,0.0720725602674638,-2.50689608839076  
"Htr1a",0.39425997266837,-1.93147266646656,4.75105661583361,-0.4065353  
92575546,0.684349257344212,NA,NA  
"Parp8",2223.70482904937,0.22612331877876,0.386989774787233,0.58431341  
9916801,0.559009464988003,0.687686419683884,0.084665619950888  
"Emb",1315.0587036475,0.311085929702214,0.336528769340118,0.9243962419  
97993,0.355280050603578,0.500379256477071,0.215392461822587  
"Hcn1",0.649899978678065,0.845435098454681,1.74096377741864,0.48561326  
1700495,0.627241392011203,NA,NA  
"Mrps30",1449.99037756669,0.228577022420683,0.272223165191635,0.839667  
786023181,0.401094680774428,0.545137605307389,0.138681572028922  
"Fgf10",168.603383381852,-3.06197664403484,0.891802538397935,-3.433469  
30760646,0.000595909666077083,0.00393999547954254,-16.9528654905081  
"Slc4a7",1002.32416146768,-0.270190809951418,0.215464658929879,-1.2539  
9131019138,0.209845163964419,0.343597666021014,-0.28864048723194  
"Psm6",3419.04630558,0.305901663091619,0.12375522782713,2.47182820849  
333,0.0134424095737221,0.0425487178357846,0.965763840605997  
"Atxn7",2079.80462551471,0.23322413827857,0.196505621678187,1.18685733  
408948,0.235283899111197,0.373202466609375,0.229873687111692  
"Fezf2",2.7790433839095,-1.6037221915402,1.54268759000592,-1.039563811  
83701,0.29854259703475,0.442873894919284,-1.30618395179737  
"Ptprg",2686.88072209535,-0.271028237061678,0.200774240256177,-1.34991  
539111721,0.177043124133096,0.303551427571852,-0.323121011892688  
"4930452B06Rik",159.259244324781,-0.489196591261455,0.258504188071711,  
-1.8924126332752,0.0584360241086647,0.130933762131779,-0.9945678398010  
15  
"Pdhhb",11033.2002486746,-1.13738899018337,0.54158212967839,-2.10012282  
13693,0.0357180382679131,0.0898735720928855,-2.74036969984695  
"Oit1",710.88935786016,-1.17013453531518,0.340856437579852,-3.43292485  
136372,0.000597107572354576,0.0039465774392439,-6.47658530009384



"Fam107a",1836.84033792596,1.59084756939409,0.509752302972709,3.120824  
6831192,0.0018034536621125,0.00922690619361572,7.45412544617759  
"Acox2",2126.1988000239,1.94449219746486,0.721336796082062,2.695678645  
57356,NA,NA,NA  
"Kctd6",1111.32263060265,0.478618864329278,0.150764905708128,3.1746039  
4434138,0.00150041140759348,0.00804593554049989,2.30818169548069  
"Map3k1",4953.530374478,-0.283592837965268,0.220160511481958,-1.288118  
54612951,0.197704700336884,0.328715464071678,-0.31551482861202  
"Il6st",8302.79186392582,-0.945669169152193,0.166032400853038,-5.69569  
050554923,1.2287359728306e-08,9.32213774251015e-07,-13.131281859368  
"Ddx4",25.0302688668897,0.561179151808666,0.366893996531563,1.52954029  
532721,0.126130557615176,0.235091636782402,0.812463894655381  
"Plpp1",2530.04965219901,-0.569454132366067,0.210554518996799,-2.70454  
481375782,0.00683980431269962,0.025330010349291,-2.09317980027715  
"Gpx8",2211.84234220662,-1.17173732929195,0.327299834153866,-3.5800119  
860162,0.000343578447365136,0.002574593607504,-6.9859724558882  
"BC067074",625.178149529011,0.196919587513863,0.186163952405216,1.0577  
7506853333,0.290158001726376,0.433923969754631,0.164405395935247  
"Ndufs4",4952.40527785832,0.631644394882864,0.397203659999852,1.590228  
03285121,0.111783413833322,0.214446013575439,0.97254114236166  
"Fst",532.406630798098,0.291243446859274,0.608686334150176,0.478478701  
622071,0.632309529785557,0.747606040371038,0.0847166386204525  
"Kat6b",1467.72924272439,-0.088885861555584,0.186764460759903,-0.47592  
4922728485,0.634127865852523,0.748983833801339,-0.0256913809333504  
"Dusp13",6.65678599149251,0.303326364848227,0.621586318065261,0.487987  
51843888,0.625558682001972,0.742551027741047,0.0902892439540507  
"Samd8",2335.54031128677,0.668651952547572,0.147252300895139,4.5408591  
1379904,5.60254619858969e-06,0.00010818090741651,6.10593282201006  
"Vdac2",10258.8306453059,0.347145256657744,0.150616893211434,2.3048228  
4726472,0.0211764969834677,0.0601199483775878,0.975968886284736  
"Nkiras1",1454.09078789615,0.598580032925345,0.181987590545238,3.28912  
554494506,0.00100499184774685,0.00589510560991821,3.07289010839893  
"Comtd1",671.025702779904,0.33074051079174,0.216722912308244,1.5260984  
9724301,0.126985336280772,0.236098034404739,0.477426626233665  
"Ube2e1",2869.31726047023,0.176395024446555,0.129281952359702,1.364421  
10617087,0.17243506887857,0.297718849995072,0.213721216048737  
"Nr1d2",4866.97194027822,1.34437817014309,0.123612488066364,10.8757471  
932879,1.50418262830345e-27,7.33213822166516e-24,71.6147227059498  
"Thrb",1233.80913171432,0.511464448431403,0.277020495367992,1.84630544  
303943,0.0648478678779702,0.141524067312189,1.00005901433636  
"Dlg5",1998.20665230855,0.426058214163478,0.225243263538962,1.89154697  
667475,0.0585513662935872,0.131162056524858,0.865461273574939  
"Ngly1",2113.75352470853,0.0811201983141385,0.214614586454855,0.377980  
824389131,0.705444839025617,0.804325096270481,0.0176640645701291  
"Oxsm",1085.37202687665,0.56132447300662,0.310688729406352,1.806710124  
56477,0.0708074882534358,0.151431875174453,1.05956697840238  
"Sftpa1",1.39535968377157,1.64562667088031,1.4284864955204,1.152007160  
05425,0.249318131091902,0.388927507803016,1.55406780100599  
"Dydc2",1.32976218936424,2.12583171965916,1.76269016053282,1.206015536  
51186,0.227811499934671,0.364237436612871,2.14698231163545

"Prxl2a",8210.31760772519,-0.283006854876765,0.58921447607705,-0.48031  
212125168,0.631005471144812,0.746535289358386,-0.082726410145216  
"Glud1",15524.0845651386,0.303500398564918,0.169951646570229,1.7858044  
0195678,0.0741309337490594,0.15693247852973,0.562064418615617  
"Sftpd",45.761420257003,-0.404482512373894,0.807142732149491,-0.501128  
853996767,0.616280441196459,0.735162804677183,-0.124444425089351  
"Bmpr1a",3209.81535925512,-0.452075673980318,0.143066066033544,-3.1599  
0847105786,0.00157818708521628,0.00836636535822377,-2.16252014146435  
"9230112D13Rik",2.04837263902616,0.411598802916198,1.15871464111778,0.  
355220162333619,0.722424661055557,0.816753891388125,0.0833147858854914  
"Ldb3",214.460440887325,-0.956309647174158,0.23854642245336,-4.0089037  
4854032,6.10012721040223e-05,0.000674264627825525,-6.98286584252251  
"Opn4",0.875217721624989,-1.2172759199356,3.52779741313066,-0.34505267  
0939898,0.73005477382736,NA,NA  
"Cdhr1",12.3433645283157,-1.39796843470965,0.600747085644667,-2.327049  
88191409,0.0199626105147067,0.0573917693623932,-3.99519020981516  
"Nid2",1425.48898163042,-0.147368846205541,0.215865856225219,-0.682687  
150170646,0.494804551145231,0.630815949930019,-0.0678988900497197  
"Rtraf",3708.6427499897,0.181983651380313,0.269116959727446,0.67622513  
1127451,0.498897718978052,0.634416469355902,0.0828115965888616  
"Nudt13",1541.0162618036,-0.276321220511621,0.252458924848746,-1.09451  
95170944,0.273727192310255,0.416670528196218,-0.241908029183123  
"Ecd",1933.9370922479,0.284530613911762,0.114676623124067,2.4811561952  
2501,0.0130956974121947,0.0416541448846609,0.904339128172355  
"Dnaja9",1088.21951036801,-0.250715167898666,0.160181144947325,-1.5651  
9775146515,0.117536548596144,0.222952390750814,-0.376272578031022  
"Anxa7",7220.20688879149,0.0366297699236047,0.127579795356329,0.287112  
624858021,0.774026085724542,0.85386507588042,0.00578684755189222  
"Mss51",101.678548177028,0.360297079615077,0.291788895023889,1.2347868  
125193,0.216909856623985,0.352266232255077,0.375922460525671  
"Ppp3cb",2643.73269366381,-0.483968342119233,0.141796900508069,-3.4131  
0945715413,0.000642261404568086,0.00418263622787861,-2.65060437617028  
"Zswim8",5625.11081829507,-0.0987234210389863,0.169185981472325,-0.583  
520101251031,0.559543229219668,0.688109358771687,-0.0369035554052312  
"Camk2g",2082.19398936335,-0.119424417027859,0.187329205998744,-0.6375  
10933712384,0.523792090343994,0.656724094241685,-0.0502169279596047  
"Plau",21627.7775689398,1.17468526080188,0.355378764294295,3.305445847  
7128,0.000948254260658903,0.0056369090165632,6.0830129556629  
"Vcl",4284.29552690581,-1.0374117301534,0.145244308077535,-7.142529327  
89357,9.16289581595504e-13,7.76774533128223e-10,-21.7606146088037  
"Ap3m1",2017.71679069554,-0.728981994467232,0.262834349532265,-2.77354  
15700593,0.00554497554821155,0.0214430649026237,-2.80100688269612  
"Txndc16",1373.31554183121,-0.163790368890128,0.139868025327654,-1.171  
0351133251,0.241584663418857,0.380086965814643,-0.158443464243156  
"Ero1l",1532.65916651263,0.0578496000881934,0.144620068577933,0.400010  
874403778,0.689148507360361,0.791576883446971,0.0135210868328587  
"Psmc6",4214.90561447356,0.0137680616114044,0.15701729288263,0.0876850  
018150296,0.930127040521318,0.956640470236786,0.0006103057102644  
"Bmp4",2086.67143835463,0.779493983363323,0.373502169459323,2.08698649  
459442,0.0368893553732416,0.0921265440038622,1.85877524830344

"Samd4",713.726677198554,-0.585173398537076,0.403442578667331,-1.45045  
027341944,0.146932996448827,0.263705777315835,-0.779990073758326  
"Mapk1ip1l",3613.41355918857,-0.304323232951442,0.157295763502944,-1.9  
3471983080934,0.0530246855129986,0.12156088396619,-0.641312533629708  
"Ktn1",4362.05662551435,0.104976283080536,0.308679053037143,0.34008230  
2468072,0.733794548919713,0.825926578239137,0.0200766509163781  
"Peli2",1710.85287526581,0.730057998736613,0.217562106863526,3.3556303  
0373928,0.000791843436389462,0.00492251315541957,3.87948153628994  
"Otx2",0.350131091224499,0.00799630514901372,3.86535327726682,0.002068  
71263127284,0.998349407308075,NA,NA  
"ccdc198",3586.1211681245,1.36433872336201,0.645443262632589,2.1138011  
6944322,0.0345322530531046,0.0875337844552046,3.32316137544429  
"Anxa11",5562.87630869518,0.190326223529047,0.129390155191485,1.470948  
25914215,0.141305110106808,0.256032621212019,0.259310042424993  
"Tmem254b",6045.15311256515,0.994624667364702,0.243187502222032,4.0899  
4976418074,4.31466629948207e-05,0.000517706852352624,7.52543108623169  
"Ppif",2014.45606965589,1.02776415823341,0.194276753314265,5.290206577  
47393,1.22178284757767e-07,5.31748258081905e-06,12.4816926787122  
"Slmap",3649.94919870837,0.0121455908906812,0.169201689656364,0.071781  
7352495002,0.942775608478315,0.964592475946382,0.000437843347923884  
"Gm49342",332.789662775073,-4.95326126034127,1.23522817669232,-4.00999  
698177633,6.07195240016265e-05,0.000672573859719555,-36.1805947340507  
"Rnase10",3.73632631256686,-0.120481753109403,0.834135443889255,-0.144  
43907640184,0.885153761806771,0.928287868314782,-0.00896545584749598  
"Rnase4",2210.13107975879,-1.8303227156576,0.351345004021829,-5.209474  
14850358,1.89376590714788e-07,7.35550750150784e-06,-21.6345265247187  
"Arf4",7376.1926925375,-0.175976346670687,0.239902322035556,-0.7335333  
19634168,0.463233213394478,0.602342193715608,-0.089207613232042  
"Dnah12",107.764411460387,0.73692249110682,0.616555060862606,1.1952257  
5984667,0.23199883663407,0.369115733716124,0.734450147549213  
"Rnase6",505.168391994864,-1.28391887017903,0.486802824788289,-2.63745  
156108618,0.00835315543752703,0.0294156892672905,-4.52738951221088  
"Hac1l",1124.81058743381,0.46991023675784,0.386989962620279,1.21426983  
164141,0.224644701897257,0.360860306277206,0.478962756143683  
"Gpr65",599.823510863045,-0.909003750820153,0.438782555486901,-2.07164  
970314616,0.0382981211050035,0.0948478045605688,-2.14114172692636  
"Eaf1",2098.83785100567,-0.114692435991796,0.111643898523634,-1.027305  
90304061,0.304276443640457,0.449010981465347,-0.0918351434606653  
"Mettl6",1738.36137291338,0.139931658350178,0.130210213995522,1.074659  
61429869,0.282527151167273,0.426437095019314,0.119262411039645  
"Sh3bp5",3511.27586904071,0.235126958710323,0.161954411968228,1.451809  
52993396,0.146554573347456,0.263294221616431,0.313772966561721  
"Capn7",2351.31160492701,0.0806402518125133,0.0805151032250244,1.00155  
434921494,0.316558878452917,0.461719405451449,0.0623186188623977  
"Arhgef3",1992.06901434203,-0.297341909528141,0.17663224242043,-1.6833  
9542913344,0.0922985675339343,0.185628401040984,-0.500726287437219  
"Asb14",17.3116317731383,0.6361332174365,0.658846526303513,0.965525645  
259987,0.334281597342376,0.479040319343058,0.468175289177021  
"Btd",3155.59898517367,0.641501950013099,0.160002325879983,4.009328904  
97033,6.08915540038221e-05,0.000673433647173297,4.68496641809664

"Bap1",3072.71702291995,0.191986655391234,0.0930647156455549,2.0629371  
0843573,0.0391186038779213,0.0963170272018828,0.449269923185248  
"Phf7",466.859005357166,0.52982788440722,0.185823872075697,2.851236918  
53429,0.00435495074202575,0.0178801494141963,2.13206139678266  
"Galnt15",702.559792439682,-1.16958666349126,0.36787093481645,-3.17933  
968899942,0.00147610994730666,0.00794402201285822,-5.65534400932166  
"Sema3g",5179.09872604304,-0.334952696923458,0.224584182219747,-1.4914  
349426253,0.135847339812739,0.248289410542631,-0.466642778030849  
"Dph3",1584.25040793281,0.517169733180564,0.151677132688305,3.40967503  
811759,0.000650403262503527,0.00422859713647675,2.82679028040193  
"Oxnad1",1384.29912072978,0.315667525941782,0.244470753926361,1.291228  
1770803,0.196624567232242,0.327590003579788,0.352282573000762  
"Gm6768",0.906227186984328,2.32597184027891,2.04412869125515,1.1378793  
5673008,0.255170862286299,NA,NA  
"Nisch",17725.5341331109,-0.021861784333429,0.188482666470005,-0.11598  
8301433056,0.907661813319305,0.943217504455568,-0.00127800430689561  
"Parg",1222.55200611566,0.00400719368734569,0.123903138259322,0.032341  
341338416,0.974199840814704,0.984077077375299,6.43196835928946e-05  
"Ogdhl",225.903987408802,0.273856883836788,0.354684813369202,0.7721133  
62383301,0.440047288672323,0.581868060108743,0.148296667779427  
"Glt8d1",2278.44304588772,0.120003236988905,0.173833613930172,0.690333  
901917899,0.48998423287274,0.626431878077023,0.0561273433498039  
"Spes1",3480.34525382363,-0.0122643417040885,0.414485688182759,-0.0295  
893007979586,0.976394598305268,0.98508443949892,-0.000184307498207736  
"Nek4",1179.10776788493,0.371176207164743,0.0911551222816739,4.0719182  
6278057,4.66275427961649e-05,0.000548337653461776,2.78702083460344  
"Chat",0.190492544179401,-0.093074062650293,4.78471990595139,-0.019452  
3534250196,0.984480246300821,NA,NA  
"Itih4",124.512118654378,-1.54074001399139,0.478681773581485,-3.218714  
60127595,0.00128766576769939,0.00713669901608946,-7.61511511840772  
"Hnrnpa1l2-  
ps2",0.189257774950513,1.54478541448517,4.76381577441217,0.32427480146  
9582,0.745729995342555,NA,NA  
"Ebp1",846.609486763759,-0.180456796700378,0.319003137999449,-0.565689  
722778493,0.571604722809597,0.697880330954385,-0.0649116878390938  
"Kpna3",1871.17604959962,-0.538239864753975,0.156145116598074,-3.44704  
897905602,0.000566745825051369,0.003803927744183,-2.9989224270133  
"Spryd7",1046.37703010448,-0.264160931289846,0.292601576746301,-0.9028  
00778544286,0.366631637885092,0.511542075905442,-0.177073791741891  
"Rnaseh2b",898.184266900769,1.05464586430119,0.273958127831244,3.84966  
079542945,0.00011828151417166,0.00113552583127476,7.15119444392721  
"Gucy1b2",3.41128422898187,1.88065651120192,1.01377982229756,1.8550936  
503547,0.0635828543828567,0.139406105336438,3.70557785663626  
"Mapk8",1418.22910614118,0.0953194616350202,0.156049736361936,0.610827  
44423188,0.541313822582147,0.671766059337886,0.0379223831342831  
"Pspc1",686.352423687072,-0.736939339293042,0.188664892362233,-3.90607  
563530225,9.38071605309142e-05,0.000941839349140971,-5.13475443011831  
"Ctsb",38841.7714975697,-0.898042346174063,0.309307720697542,-2.903394  
53586488,0.00369141276894389,0.0158140610840868,-3.72405210530567  
"Pttn20",0.539681850234574,-1.96359776848959,2.4443424060125,-0.803323

529330265,0.421787761603662,NA,NA  
"Gdf10",1149.71086050609,-1.54577142209135,0.31742649827177,-4.8696987  
5075747,1.11768513582753e-06,3.01607735157191e-05,-16.0898858368317  
"Gata4",1.91529805612336,-1.6015802148719,1.15235096491235,-1.38983717  
950349,0.164578325283071,0.28717989854746,-1.9982058460722  
"Zmym2",2032.49663037448,-0.041450292520822,0.134362306203507,-0.30849  
6435436592,0.757704612182408,0.842854396336032,-0.00708638581126485  
"Cryl1",7557.87408945225,1.76549609520164,0.466210174386651,3.78691026  
536334,0.000152532153715869,0.00137943967214843,11.6276948097458  
"Prkcd",6530.78875399155,-0.262456599322333,0.244515655581764,-1.07337  
339483594,0.28310361665772,0.427075769252784,-0.223296456904754  
"Anxa8",602.671621556694,-2.81644702318714,0.750278717195137,-3.753867  
67429073,0.000174126810507226,0.00152111315021053,-18.2739894864859  
"Eef1akmt1",650.007214714937,0.22030796689351,0.282134899788638,0.7808  
60386497927,0.434884612981785,0.576985586820825,0.121155721000965  
"Xpo4",1224.82273354334,0.482373527545115,0.231809149589064,2.08090805  
906598,0.0374423223563503,0.0931662074150227,1.14485095767799  
"Tdh",1.63868703795132,-0.721426763824422,1.6061165550762,-0.449174601  
646636,0.653305707773557,0.76376991786598,-0.194416353367863  
"Tkt",28452.9858857102,-1.81727988453632,0.592977947688254,-3.06466689  
296128,0.00217912555097104,0.0106782080906844,-8.24963333835312  
"Pinx1",506.128832360431,-0.11238929334779,0.260887422395899,-0.430796  
135419812,0.666616609810183,0.774277403998468,-0.0287519984451104  
"Lats2",2246.24230584428,-0.371490345542256,0.125911010485759,-2.95041  
985692166,0.00317342362128288,0.014085001995851,-1.58353136588319  
"Dcp1a",1331.010736806,0.0338104140154453,0.166921660970326,0.20255258  
5559617,0.83948475291734,0.897124821651609,0.00367046774302639  
"Sap18",1664.7920233074,0.489874808016337,0.156896733316761,3.12227538  
241552,0.00179458988394855,0.00918879032490253,2.29740065884904  
"Ska3",52.323579772084,-0.752899493339217,0.494856398410846,-1.5214504  
5665174,0.128146835105725,0.237645709614936,-1.08189724459353  
"Mrpl57",1386.00982852338,0.865971901526182,0.218493441062071,3.963377  
1032979,7.38969129862838e-05,0.000780098543262892,6.19697313215614  
"Zdhhc20",2988.35561977352,-0.306260583556189,0.156374617577498,-1.958  
50572363132,0.050170700086826,0.116691913431103,-0.657914509231677  
"Hmbox1",1977.45324341926,-0.304929159676772,0.0839280121371959,-3.633  
22270969922,0.000279903224798575,0.00218564400365343,-1.86794869355841  
"Micu2",2992.83631221455,0.357191703754227,0.0966588243361725,3.695386  
38823022,0.000219552640562618,0.00182163293008082,2.25317311329016  
"Fgf9",955.361179296712,1.32888971799731,0.384109654383385,3.459662372  
0135,0.000540853079798768,0.00367825369721534,7.44884836426438  
"Ints9",741.766839875465,-0.131399107746012,0.0819041471781807,-1.6043  
034726942,0.108647176017772,0.209805153807519,-0.20518969544087  
"Extl3",3001.65100579829,-0.811278253973741,0.186945598012134,-4.33964  
887432698,1.42710558675643e-05,0.000223859249642613,-6.81838244990771  
"Cab39l",2440.30095390692,0.128096274021398,0.256336333644975,0.499719  
53721867,0.617272573738159,0.736020317180965,0.0392611948906523  
"Cdadcl",2311.54426506703,0.333049376789753,0.18307999361091,1.8191467  
5776953,0.0688890431314904,0.148337776143324,0.635545914274161  
"Atp8a2",87.1248127303944,-1.83022116588849,0.594667326109248,-3.07772

276284818,0.00208588872142122,0.010306752365993,-8.3731813573298  
"Amer2",81.9038291291157,-1.41111006635446,0.632513040701065,-2.230958  
06023289,0.0256839072315641,0.0699464302568552,-3.75358891779107  
"Mtmr6",2742.0270662528,-0.375242085268759,0.14465780603631,-2.5939981  
7784164,0.0094866989697666,0.0324739565506512,-1.28607352084204  
"Spata13",2330.19255304989,-0.157997517517556,0.240501214942904,-0.656  
951016048152,0.511212413483752,0.645404016971393,-0.0691837594838043  
"Cacna2d3",21.6059714383035,-0.304068342501622,0.3901954209486,-0.7792  
71939589665,0.435819540520348,0.578029345015016,-0.166669175688873  
"Mipep",1377.24548095289,0.356806590638708,0.313110608434547,1.1395544  
6103416,0.254471966741293,0.395165212449962,0.331277557970074  
"Wnt5a",1362.96450159766,-1.5799393366858,0.435929629158038,-3.6242990  
4050643,0.000289746207262303,0.00224929072014609,-9.63311187702604  
"Esd",13266.179393085,1.00612791676805,0.288481628739798,3.48766720835  
297,0.000487254144967855,0.00339181767889441,5.72123503324272  
"Lrrc63",1.21706099360028,-3.67066886723376,1.77462040997853,-2.068424  
80036515,0.0386000951416782,NA,NA  
"Lcp1",5012.13824586669,-1.26409217381009,0.336523327713014,-3.7563285  
2082133,0.000172424320687012,0.00151030072091436,-8.21084307980781  
"Cpb2",24.2138899054068,2.09965702486055,0.498731231054138,4.209997076  
8276,2.55373992409442e-05,0.000346505365622777,16.729253041004  
"Zc3h13",3954.94847892385,0.534973845374044,0.178981118948991,2.988995  
98189744,0.00279895812523851,0.0128418928777393,2.32983387108304  
"Erich6b",0.185691316495273,2.57351138408779,4.72851649690914,0.544253  
443076702,0.586267079921631,NA,NA  
"Slc25a30",4524.88518461734,1.10478432441706,0.332324217794336,3.32441  
713622199,0.000886035596600765,0.00536852767635852,5.77493037032715  
"Gpalpp1",1159.93812110914,-0.336946040841324,0.143421604291843,-2.349  
33950505592,0.0188067499477546,0.0548368491821923,-0.978286736150723  
"Nufip1",671.902128721247,0.179172726274774,0.109438944141315,1.637193  
48428119,0.101590048057091,0.1997322620552,0.288607395918551  
"Tsc22d1",32766.1891113532,0.0672271415222775,0.264976975377237,0.2537  
09370131382,0.79972009455333,0.872162120833555,0.00919532532273223  
"Enox1",101.203149816668,1.35447999493838,0.301838132852953,4.48743829  
063587,7.20846817343919e-06,0.000131478683298145,12.1045350796286  
"Dnajc15",2394.4269262648,0.457096235883816,0.397440286535728,1.150100  
40846155,0.250102518174093,0.389808065496281,0.430630729846908  
"Epsti1",1043.22903602173,-1.18154743977087,0.332752287882855,-3.55083  
190348142,0.000384015598786992,0.00280327073947913,-6.94391699296064  
"Tnfsf11",39.6835102354343,-1.63036749003882,0.670643168669842,-2.4310  
5061857635,0.0150551110966562,0.0462785048340853,-5.01024595057644  
"Akap11",2616.37179921291,-0.0145508876188697,0.148795877444264,-0.097  
7909325768794,0.922098307627879,0.952029272021625,-0.00071531431248727  
5  
"Rgcc",1623.30128180399,-1.84151609305859,0.612766897719131,-3.0052473  
4595351,0.00265364956512805,0.0123394484712482,-8.09337843802667  
"Tdrd3",1725.74105915219,1.01003214818819,0.265502879082326,3.80422295  
863315,0.000142250014426614,0.00130891495105716,6.70515575185801  
"Naa16",1196.52051899622,0.443193414516585,0.251643764416937,1.7611937  
07873,0.0782056226642025,0.163435501683454,0.802772564096356

"Diaph3",62.8714685239614,-1.05559114122892,0.585848216271021,-1.80181  
677081456,0.071574238242771,0.152619695675585,-1.98430666757406  
"Mtrf1",265.956574671637,-0.133776131264019,0.350553368463371,-0.38161  
4165770018,0.702747575301831,0.802469822737049,-0.0294389130682888  
"Wbp4",2465.28955673729,0.428336918490038,0.196528994235949,2.17951005  
222052,0.0292937987338453,0.0772060675469742,1.09708959604198  
"Sugt1",2554.08950556502,0.323746152137471,0.161407134980627,2.0057734  
8811952,0.0448804204880449,0.106960551807331,0.723668215745885  
"Cnmd",4.28179023541701,-0.867921235271054,1.05339975094255,-0.8239239  
04001744,0.409982797169198,0.553513680875572,-0.513348340294857  
"Olfm4",2424.82041730429,0.80074631060882,0.592745105055944,1.35091172  
205166,0.176723712786323,0.303110393376823,0.955817403981498  
"Elp3",2077.60394058824,0.0318455949837408,0.126999675513532,0.2507533  
57085133,0.802004805218105,0.873846867401096,0.00429438254707794  
"Scara5",374.318691461263,-2.44628433092059,0.626583052601248,-3.90416  
61289192,9.45508187815557e-05,0.000947841575631246,-17.0293758274627  
"Pbk",102.603728330335,-0.621696396257913,0.467076221386202,-1.3310384  
2112284,0.183176369116517,0.311329571568501,-0.725459521838119  
"Esco2",77.7598474204663,-0.852290398694535,0.3827976968625,-2.2264773  
4215777,0.0259822250035828,0.0705180154676863,-2.26017788243839  
"Ccdc25",2013.98416217614,0.327221353540942,0.181478520820368,1.803085  
85314531,0.071374732548966,0.152310882701077,0.615775472145316  
"Clu",24395.4279620001,-0.124469567913984,0.325550578640957,-0.3823355  
7573018,0.702212469866439,0.802022159109357,-0.0274603567921481  
"Adam2",2.8274163936332,-2.52597189995775,1.67599300717999,-1.50714942  
671982,0.131772359969159,0.242500941451502,-3.57866989696349  
"Ephx2",12866.9419516585,0.903523814357698,0.439186635634676,2.0572661  
8491476,0.0396606281911903,0.0972585748298112,2.10555574858122  
"Chrna2",29.8439040190865,-1.05516244783607,0.506055281725303,-2.08507  
348098153,0.0370626310249356,0.0924839605742762,-2.51204639419464  
"Trim35",2241.90104562178,-0.865971798177015,0.13179540437562,-6.57057  
658633508,5.0120796233772e-11,1.37641589431843e-08,-15.6751268091766  
"Stmn4",8.14379215836258,-0.307532307332614,0.714486034327352,-0.43042  
4518545192,0.666886863046694,0.774492825998239,-0.0785889222286814  
"Dpysl2",2216.72600801152,-0.644912584518348,0.239565913812571,-2.6920  
0477753653,0.00710239278567115,0.0260501231254733,-2.35246877754764  
"Bnip3l",5589.59613302426,0.0225013596651117,0.207323912388977,0.10853  
2389755867,0.913573388944409,0.946837502665077,0.00122919960032591  
"Ppp2r2a",2013.19625585173,-0.559562823964512,0.245595949887077,-2.278  
38783262425,0.0227034806899698,0.0634655865939831,-1.54285877261159  
"Ebf2",117.924272937694,-3.20474338649802,1.28047386624222,-2.50277922  
180708,0.0123222383985459,0.0397385055069215,-10.336690361043  
"Nefm",37.0749061100613,0.93836585018422,0.537806434661049,1.744802199  
65316,0.0810193058027518,0.16787613438279,1.67454094732495  
"Nefl",35.71771993759,0.277347802634425,0.605137784497081,0.4583217405  
02328,0.646721307117407,0.759213200444049,0.0764017326462396  
"Adam7",6.9542373451905,-3.94892155610678,1.43781886799128,-2.74646664  
056068,0.00602410120571523,0.0229230923710062,-14.9095895962793  
"Adamdec1",89.7490425377767,-2.61318488708009,0.817296460988052,-3.197  
35250525976,0.0013869532082484,0.00757128476665695,-12.7612074989291

"Nkx3-1",98.743356141599,-0.0122269362070126,0.466677207657902,-0.0261  
999857854115,0.979097827221238,0.986669833155619,-0.000164083173715677  
"Pibf1",329.84231217483,0.0941321698572537,0.144092328879145,0.6532767  
60737246,0.51357787157322,0.647463094731714,0.0409186408327725  
"Bora",343.717634161385,-0.148864066225626,0.248189248175583,-0.599800  
62520803,0.548639116618813,0.678505127626474,-0.0577388994087901  
"Tnfrsf10b",496.833296372273,-0.820294606081918,0.213559227039185,-3.8  
4106375292043,0.000122502290701556,0.00116457809073571,-5.541415238243  
59  
"Rhobtb2",925.233695674144,0.00790811010218094,0.103158868149705,0.076  
6595276201034,0.938894402032998,0.962136072467515,0.000305248232701139  
"Klhl1",0.504957397744252,-2.56651751724077,2.52163309205463,-1.017799  
74466848,0.308773133406742,NA,NA  
"Pebp4",0.927011348153509,-2.04876255156336,3.09021026841563,-0.662984  
837149537,0.507340265254927,NA,NA  
"Bin3",1336.25547220426,-0.0390941435500546,0.16781445447055,-0.232960  
525798541,0.815792058325018,0.882553069530513,-0.00488427985709423  
"Pdlim2",1411.50212041062,-0.476429968345363,0.253241170242131,-1.8813  
29042548,0.0599271726772868,0.133466252487735,-0.95948546886211  
"Sorbs3",2055.83297058066,0.00631587151940382,0.138825835675985,0.0454  
949288700472,0.96371281689072,0.978160984057015,0.000139460867135215  
"Ppp3cc",620.469309852263,0.398213178793632,0.102058309696123,3.901820  
24353828,9.54720466823549e-05,0.000956093459790733,2.76863880416637  
"Slc39a14",1775.5818883486,0.75341494006765,0.161317856298653,4.670375  
35307205,3.00649869374194e-06,6.63130220934167e-05,7.24869876405494  
"Fam160b2",2171.47497879082,0.118258495950751,0.15062682089682,0.78510  
9154177516,0.432389572974218,0.574486571927306,0.065548148306593  
"Hr",996.847912501933,-2.3559002435942,0.41043331802293,-5.74003166931  
633,9.46588475889232e-09,7.62668681937531e-07,-33.1862524471334  
"Sftpc",5.14370532779221,-1.93475024853745,1.17041715080419,-1.6530433  
1640055,0.0983220481729223,0.194746372945514,-3.16536211023286  
"Bmp1",2841.488099737,-0.990390905433695,0.240699955019268,-4.11462854  
388324,3.87803403018068e-05,0.000475260260970854,-7.57812257706145  
"Dmtn",4796.14199058565,1.24362250247619,0.324114183668827,3.836988830  
29105,0.000124552134834211,0.00117946455803664,8.38536686602492  
"Xpo7",2603.71953581093,-0.169145009669472,0.198099721482868,-0.853837  
695496709,0.393194925012861,0.537812321845021,-0.104911452040996  
"Fgf17",21.7135724244833,0.24081674427437,0.489549569333144,0.49191493  
4380202,0.622779480254867,0.740559511252631,0.0723291362829537  
"Dok2",560.296938564273,-0.382200523406073,0.263781769273303,-1.448926  
98407098,0.147357974496228,0.264395489714499,-0.508444883890366  
"Gfra2",150.541241315221,-1.96358015655194,0.320635321355016,-6.124029  
46828746,9.12380110193128e-10,1.4702138337641e-07,-30.8923935646691  
"Rb1",1534.41418860761,-0.173531935975354,0.209258505517862,-0.8292706  
45634723,0.406951277370474,0.550832072625443,-0.103481481117309  
"Rcbtb2",1941.85287797604,-0.424276017358776,0.286169813280562,-1.4826  
0227902799,0.138180111281804,0.251703644410745,-0.585289995396998  
"Itm2b",62134.4471024088,0.0144170448455344,0.168570448513346,0.085525  
3395401206,0.931843751231238,0.957426856800689,0.000627227240984422  
"Med4",1034.59785932117,-0.0350036076857763,0.10044069859419,-0.348500



241194073,0.727464532714354,0.820839320536139,-0.00691068877800362  
"Suc1a2",7230.93907465081,-0.237016573315987,0.498624412667552,-0.4753  
40892452478,0.634544016833281,0.749339182376313,-0.0683943440430481  
"Uchl3",1084.25174414165,0.231511915771771,0.202520617157675,1.1431523  
319501,0.252975349661431,0.393342373819664,0.216017949824901  
"Gpc5",35.5743765516894,0.136533674121689,0.640116222174352,0.21329513  
2027604,0.831096770276075,0.892267355417859,0.0155634005367234  
"Trim52",24.954444550199,-0.016513053014355,0.360350745441844,-0.04582  
49447884658,0.963449776625846,0.978046740493088,-0.000366553748311827  
"Spry2",976.632432120174,-0.0578792982134151,0.208980078107447,-0.2769  
60841136525,0.781810174592758,0.858947133837245,-0.00880042590521977  
"Rbm26",2828.23563540499,0.00976653287984358,0.0834237323022252,0.1170  
71396955265,0.906803475766025,0.943050351856775,0.000572666538572882  
"Rnf219",278.180851164336,-0.536735719054261,0.20106264581886,-2.66949  
49569987,0.00759654138731086,0.0273885658228157,-1.93097634160355  
"Ednrb",1335.36862102919,-0.961029047833732,0.355145128714928,-2.70601  
782237915,0.00680953912948528,0.0252563047264036,-3.53531782093378  
"Scel",264.836332912249,0.230212418268524,0.556317988278287,0.41381444  
2673323,0.679010005963897,0.783856548033396,0.0560634575203645  
"Fbxl3",4444.95902128914,-0.0174482666190595,0.109928791261215,-0.1587  
23355536573,0.873886836386736,0.921235285353051,-0.00143145244485891  
"Cln5",1445.20835859444,-0.234426138274337,0.156315784814619,-1.499695  
87877739,0.133693198606891,0.245318086433009,-0.329415515391355  
"Acod1",22.6000458713147,-1.69955514473714,1.22794911087654,-1.3840599  
172094,0.16634010889697,0.289399432789606,-2.10735902491986  
"Dct",19.3547293180563,-3.34950229204306,0.86246590669937,-3.883634432  
41658,0.000102906593071411,0.00101234750338364,-23.0964374003541  
"Tgds",928.658615850365,0.128614146580421,0.149282911786123,0.86154634  
205344,0.388937209203243,0.533073084847803,0.0809107409009807  
"Gpr180",1146.31666994785,0.257879535867613,0.118071402284873,2.184098  
1886996,0.028955033764787,0.0765408416954741,0.662732562493481  
"Cldn10",5329.95793381029,1.67144548867051,0.569093794143772,2.9370298  
9888561,0.00331372153788052,0.0145749926789069,7.06762041566316  
"Dnajc3",6775.25564166853,0.169091928351227,0.120437990114156,1.403975  
00980342,0.160326291285116,0.281828527540316,0.214147563532327  
"Mbnl2",4294.67829379738,-0.705451565039786,0.181422402714292,-3.88844  
792310874,0.000100887310958391,0.000998021709318477,-4.87448374299011  
"Nipbl",5013.20533890824,0.191372193965616,0.185681418824661,1.0306480  
5933182,0.30270589021794,0.447302724325077,0.153962695860206  
"Nup155",940.348297619756,-0.164453235547981,0.162389784191722,-1.0127  
0678058062,0.311200238150553,0.456361480404594,-0.129008640103328  
"Gdnf",20.3052943254906,-0.187746401049624,0.470495323724594,-0.399039  
887502734,0.689863814007135,0.792258490134946,-0.0437200470591705  
"Osmr",3057.28729596066,-1.00803432321575,0.265076600636898,-3.8028038  
7176292,0.000143067617355004,0.00131519679546811,-6.68706681424635  
"Fyb",1478.6320169618,0.211700713847194,0.464800795907184,0.4554654718  
99641,0.648774402471766,0.760544552752186,0.0579468433446329  
"C9",13.506056406635,1.12809767036981,0.518737464163166,2.174698664168  
53,0.029652705072425,0.0779517923017586,2.87852699322922  
"Dab2",11961.2278112893,0.936472772626909,0.291340451505685,3.21435889

793915,0.00130736152174708,0.00721713900085634,4.61802506040456  
"Ttc33",1197.12999034191,-0.280442639026348,0.294287102759982,-0.95295  
5927718909,0.340612401263536,0.485295851115997,-0.202759066579993  
"Mcpt8",0.266234037804189,-1.081821048545,4.7800018809208,-0.226322306  
035705,0.820950750730983,NA,NA  
"Rab2b",593.009007270949,-0.151264368727632,0.16850828366615,-0.897667  
256687025,0.369362970811494,0.514332416315035,-0.100573485163607  
"Mettl3",1265.86328753934,0.131149026393176,0.142934171195038,0.917548  
444131103,0.358855319695203,0.503886001974439,0.0898902276882586  
"Dad1",4377.13661142571,0.302492319118892,0.249067130215168,1.21450116  
222711,0.224556406288516,0.360765618938972,0.308399022059254  
"Lrp10",6984.2897382107,0.223685823660138,0.0777064042044766,2.8786021  
686389,0.00399441872159041,0.0167716166735872,0.9144427023138  
"Rem2",44.6117806196991,-0.42475065192945,0.550574225430209,-0.7714684  
63852549,0.440429307930465,0.582202755662929,-0.229763137183054  
"Haus4",672.465371864136,-0.0713079953041212,0.221910869168336,-0.3213  
36199400079,0.747955626654754,0.836121936046003,-0.0127627634734501  
"Ajuba",2523.15674407322,-0.14483166291921,0.214895897915535,-0.673961  
971001121,0.500335491422697,0.63558156308292,-0.0656398606526971  
"4931414P19Rik",367.292855132192,-0.0146029017775461,0.221973617543714  
, -0.0657866549148358,0.947547681054237,0.967596348863282,-0.0004810235  
80608559  
"Slc7a8",4444.50793470715,0.719733518942245,0.346059653189818,2.079796  
10540574,0.0375442384870757,0.093372138012883,1.70660497641939  
"C6",219.563446314531,-1.52805728611691,0.353264759625784,-4.325529916  
24636,1.52165614703229e-05,0.00023453953798289,-12.7713291776924  
"Fbxo4",796.168380151934,0.0776755005402252,0.140104115263465,0.554412  
697972197,0.579296437877722,0.703965219429095,0.027266145750747  
"Acin1",14564.2845109374,0.0638630619036439,0.203845390858197,0.313291  
664995602,0.754059082004012,0.840195581302428,0.0111198733385429  
"Oxct1",34201.8398425105,1.81287719124151,0.350852498307462,5.16706365  
206737,2.37800296078561e-07,8.88243328149384e-06,21.0863632497279  
"Drosha",2160.12267503279,0.126786302792858,0.0901372910994747,1.40659  
100408218,0.159548702145836,0.28079841562872,0.161033596925078  
"Psm5",6744.24526912077,0.446382898996404,0.259075645203335,1.7229828  
7106865,0.0848916226376719,0.174125174594849,0.780268756617181  
"Pabpn1",11770.5438032451,0.256402798997501,0.114664509638109,2.236112  
98567211,0.0253443710446693,0.0692107208163812,0.684749187638725  
"6030458C11Rik",1132.17165703286,-0.279446555712166,0.124203312617137,  
-2.24991225937407,0.0244545155737323,0.0672231981751915,-0.75443217246  
8659  
"Pdzd2",2013.03934198846,0.0886964158139366,0.422577978605032,0.209893  
606161711,0.833750712625051,0.89375155694601,0.00996304158614002  
"Slc22a17",2655.09918965032,0.32783344410815,0.144825187797463,2.26364  
936302808,0.0235956892117298,0.065359958552395,0.894278972990382  
"Golp3",4203.04043465705,-0.111081153546404,0.201849741873819,-0.5503  
16054482963,0.582102614534889,0.706362756920666,-0.0386147363441615  
"Zfr",3797.78130801526,-0.417732317187858,0.138901139410428,-3.0074074  
1912516,0.0026348636870706,0.0122876278810099,-1.83767229725474  
"Efs",651.463626937673,-2.64780711838301,0.491560671725466,-5.38653165

455393,7.1830283521618e-08,3.53839172465398e-06,-33.2348466648133  
"Ngdn",1706.13108465034,0.0829324627066353,0.14417441770489,0.57522315  
0034767,0.565140388096289,0.692695283132211,0.030449904583892  
"Sub1",4425.95647530522,-0.230240709169252,0.233050496459973,-0.987943  
44001235,0.323180349138655,0.468114253407361,-0.17476257136036  
"Npr3",1897.69187803629,-1.31112959831346,0.290763678250603,-4.5092619  
7591787,6.50535365152105e-06,0.000121495579978312,-11.8206628472225  
"Jph4",14.9691965545155,-2.57038931549246,0.648373949991529,-3.9643624  
1080635,7.35923778167399e-05,0.000777304540991763,-18.4031607068267  
"Dhrs2",0.734427747304919,-2.06039011276931,1.71366407997053,-1.202330  
22145434,0.229235612359744,NA,NA  
"Dhrs4",6707.99765776619,1.48303210724973,0.306719385992992,4.83514304  
92353,1.33049921196212e-06,3.43149122153933e-05,15.2454670508297  
"Carmil3",398.454155791532,0.569917125140104,0.375714103874309,1.51689  
042083649,0.129294352529848,0.239250382995823,0.815120917939359  
"Cpne6",5.39195204387769,-2.17429002552731,0.802476158576993,-2.709476  
16609934,0.00673895467207761,0.0250326039619298,-8.01786003112597  
"Dcaf11",7470.3988490854,0.510164757505511,0.13011702707643,3.92081473  
861098,8.82500908546259e-05,0.000897132571159278,3.57947251479948  
"Fitm1",745.464618146764,2.76778962522818,0.952095768912666,2.90704960  
11017,0.0036485533952954,0.015687908576838,11.4997922901876  
"Psme1",7568.48259250831,-0.279007144721839,0.139321469932686,-2.00261  
413303092,0.0452187217096268,0.107547528164711,-0.622136382918799  
"Emc9",759.482707489655,-0.176599872915184,0.297858229748699,-0.592899  
088483069,0.553248688075632,0.682909782229595,-0.067353870311304  
"Tgm1",811.694640809945,1.89592171205606,0.55410356293659,3.4216017345  
3535,0.000622534299403906,0.00408417690773128,10.4287734448019  
"Cideb",5791.61864889426,1.87529375168007,0.668282399157586,2.80613967  
095947,0.00501389541693994,0.0199227497125525,7.34344967247223  
"Adcy4",721.151053122726,-0.856405532187969,0.266265662150242,-3.21635  
739761568,0.0012982903793597,0.00718374524070161,-4.22716153579887  
"Ripk3",317.849094060992,-0.923492333129286,0.331448410394341,-2.78623  
250004597,0.00533246095187926,0.0208989595255762,-3.57211997212056  
"Sdr39u1",2708.24097847817,0.431977743922831,0.287619884138936,1.50190  
500638044,0.133121643510837,0.244453362702421,0.608540324205365  
"Cma1",7.51662117351149,-4.09128757279434,1.2126692379603,-3.373786886  
58406,0.000741417436513156,0.00467081007338724,-21.9555787446349  
"Mcpt2",0.137986538933697,0.4.78471990596107,0,1,NA,NA  
"Zscan26",4670.1137913351,-0.175703145263378,0.216608313290141,-0.8111  
56056730048,0.417276057387133,0.560565562004569,-0.101698574587449  
"Atp12a",46.8912225266374,1.88688555074349,0.577872217525044,3.2652297  
4027855,0.00109375325004765,0.00630387255968936,9.56007761815011  
"Sema5a",3264.25495574717,-0.259838203602436,0.331605485548958,-0.7835  
76312594125,0.433288759400648,0.575377254702298,-0.143620203509553  
"Cct5",6263.98080304115,-0.323033226456665,0.235386772078263,-1.372350  
8063115,0.169954256465939,0.294412485406923,-0.394996463554282  
"Cmb1",5290.85512807308,1.57107161748197,0.465273247016501,3.376664417  
21343,0.000733705063553565,0.00463620638581795,8.44271709424746  
"Ropn1l",245.860564243134,0.87475599254545,0.406237295955852,2.1533128  
5742044,0.0312940989844143,0.0812155386660602,2.19620498433915

"Ankrd33b",2127.26799051735,1.09789483937785,0.436136314601864,2.51732  
039415266,0.0118251242368694,0.0385949568748709,3.57324550152804  
"Ctnnd2",184.371063865394,-0.872296996212644,0.249974805610996,-3.4895  
3965212834,0.000483853269051591,0.00337304519979324,-4.96506157365888  
"Tars",1955.39750858608,-0.554771320792605,0.177165851049077,-3.131367  
12017333,0.00173994505171427,0.00899903017798692,-2.61332712325619  
"Slc45a2",5.01455472072196,0.746944772109503,0.827148004442336,0.90303  
6419235629,0.366506566356877,0.511425250900049,0.500866686189916  
"Amacr",8259.98893878669,1.90963978744892,0.521899394834335,3.65901897  
252648,0.000253182597961537,0.002025427025393,11.8435376935458  
"Skor1",3.74858852173343,-2.01644169606828,1.04840639504418,-1.9233397  
5221823,0.054437395303528,0.123983218505804,-4.20954194795986  
"Rai14",3508.58481614439,-0.229834776259709,0.153186717921505,-1.50035  
707650241,0.133521931926082,0.245049946225033,-0.323215089199518  
"Brix1",1405.55426475303,0.0334745638545982,0.140236331514696,0.238701  
080476355,0.811337378871716,0.879810136779931,0.00428638939622351  
"Rad1",589.728468270623,0.000266292767167054,0.18604771440638,0.001431  
31437016956,0.998857976752323,0.999473100211269,1.40346580300481e-07  
"Ttc23l",1.01330985088951,-1.47312789601635,2.14353208427169,-0.687243  
22198185,0.491929471597816,NA,NA  
"Nadk2",2741.13088491976,0.911892129085318,0.249210045654466,3.6591307  
0113422,0.000253072251795595,0.002025427025393,5.65553193552666  
"Mtdh",7972.72763614934,0.460745917703204,0.232405292390009,1.98251043  
668148,0.0474221404609243,0.111752102333467,1.00971188504002  
"Laptm4b",2569.50333892597,-0.472715002919661,0.239401305421932,-1.974  
5715341298,0.0483167921004582,0.113462701719226,-1.02876073376438  
"Sdc2",4932.00855223129,0.361625395381654,0.192194265808055,1.88156183  
464292,0.0598955322406591,0.13342203674493,0.728399600902815  
"Dnah5",44.853364879933,0.56084172859247,0.540009837513496,1.038576873  
29345,0.299001566110082,0.443408315790568,0.456112515082685  
"Trio",3435.29338812042,0.0736982437945626,0.184813967759385,0.3987698  
80264205,0.690062772228464,0.79243147378423,0.017145840804664  
"Ank",1139.74240346746,-1.81377925095039,0.317148686934498,-5.71901863  
596552,1.07141044923564e-08,8.38970318843231e-07,-25.3767496614536  
"March11",1.01666418967249,-0.915303664787881,1.97282078414585,-0.4639  
56823723433,0.642678679815511,NA,NA  
"Retreg1",3823.43786878553,1.05935689799981,0.293213222358935,3.612923  
3513999,0.000302764222517039,0.00232265046748531,6.42504863725599  
"Myo10",3896.49824924623,0.609053239920606,0.3170398297428,1.921062222  
41762,0.0547238635294775,0.124432173888951,1.26926360193913  
"Rnf19a",2218.57051869533,-0.0553607198602417,0.107628537046007,-0.514  
368413616709,0.606994438520525,0.72746804119941,-0.0176149623035038  
"Pabpc1",19300.6095072867,0.0709511491431195,0.137423557641235,0.51629  
5388948874,0.605648116240863,0.726519153348486,0.0226682133228111  
"Ywhaz",20280.122013618,0.180975302596933,0.15923642393477,1.136519510  
5805,0.255739204792589,0.396564578896604,0.167387021529232  
"Grhl2",779.675185203692,-0.198840177506202,0.195890672419207,-1.01505  
689398361,0.310078707900588,0.45527401630614,-0.156458548467144  
"Rrm2b",1123.8202656613,0.173711525683252,0.159463393854221,1.08935048  
655778,0.275999357014276,0.419474274149532,0.150912422966435

"Atp6v1c1",3668.51960494676,0.191799832944451,0.168061253447863,1.14124956829477,0.253766082256936,0.394226043490218,0.178533195728218  
"Baalc",28.4165049877348,-0.821664882951577,0.525326933811386,-1.56410195264534,0.117793627493693,0.223252712441978,-1.23204615604862  
"Fzd6",1322.73136903705,-0.21991619612261,0.123958825463321,-1.77410680764866,0.0760454849544772,0.159809598618809,-0.403276202601699  
"Slc25a32",1534.18287345411,-0.175509223057671,0.264223756998699,-0.664244672966843,0.506533725631459,0.641199414553151,-0.0779988912254946  
"Dcaf13",1750.29653581011,-0.0865893452224874,0.16200310332652,-0.534491892096443,0.593001257525086,0.715801307449027,-0.0289513773915338  
"Dcstamp",58.9211754242321,-1.97002258637543,0.496876946722692,-3.96480979721303,7.34544934755137e-05,0.000776698269304374,-14.1062651921001  
"Dpys",515.781515660655,2.60971273984351,1.02494133375092,2.54620694268704,0.0108900607742159,0.0362098234951673,8.66013555426554  
"Lrp12",531.598925396934,-0.361898564513877,0.180440020377767,-2.00564466661116,0.0448941727317317,0.106971352795222,-0.808913576461941  
"Zfpm2",100.995087143027,-1.01819477231171,0.249773597292291,-4.07647078534161,4.57243973102415e-05,0.000540945058729681,-7.65905742529903  
"Oxr1",2268.29523394691,-0.746735743050676,0.163894706213875,-4.55619196190644,5.20893357320333e-06,0.000102558077974414,-6.85882851361848  
"Angpt1",499.605859041948,-0.493928204711235,0.37256947600317,-1.32573449121482,0.184927658475122,0.313186787539992,-0.573428666423809  
"Csmd3",1.27851181291386,1.3005205577713,1.97139393634119,0.659695930781345,0.509448978533049,NA,NA  
"Eif3h",6077.20206575999,0.1458702721479,0.15967290259214,0.913556838886455,0.360949754401904,0.506061574122983,0.0993517944080784  
"Utp23",581.256333286625,0.295942791210955,0.267949354414708,1.10447286524498,0.269388067962623,0.411607910754269,0.262703697153569  
"Rad21",6999.02326799473,-0.0406390974570224,0.135039530958338,-0.300942229054099,0.76345854793596,0.846656510502522,-0.00676479241971007  
"Slc30a8",0.628879332206672,1.33705672712663,2.95151781591514,0.453006490395202,0.650544067936487,NA,NA  
"Cdh10",1.85452580107119,-1.20624391273286,1.17325971516009,-1.02811329592806,0.303896537000722,0.44865409846597,-0.966808199432055  
"Shcbp1",122.887611572209,0.106854603330157,0.320744921169286,0.333145114007152,0.739024746452896,0.82981166316243,0.0199344224936506  
"Rida",30611.0749114453,2.04325590669697,0.581222779029196,3.51544361373753,0.000439019975763515,0.00311499690226965,11.792706881052  
"Matn2",2411.47634606091,-1.69074878543331,0.265417598934539,-6.37014573344215,1.88848670764491e-10,4.04634217864401e-08,-28.7813924431941  
"Pop1",572.559342338675,0.573403681625877,0.259672864847718,2.20817713072231,0.0272319279426329,0.0731562594413689,1.49954098740466  
"Stk3",1012.14390621672,-0.249624119330647,0.130663397220988,-1.91043646988959,0.0560770389156038,0.126931751192993,-0.515250574844819  
"Osr2",282.864184239331,0.420418661271562,0.243228536550866,1.72849233578166,0.0838999939202096,0.172488620988639,0.738853849557995  
"Khdrbs3",1430.63698311303,-0.27398410154278,0.18527900667956,-1.47876495266749,0.139203145829795,0.253235952359521,-0.376298972801671  
"Zfat",170.835485682514,-0.448104345848831,0.168564430348948,-2.65835648079018,0.00785227869168839,0.0280832284580741,-1.60088984849697

"Eif3e",4919.86004613475,0.0984059968105417,0.124946240811994,0.787586  
694653842,0.430938499883503,0.57330895304314,0.0547462596236153  
"Emc2",2301.73589689595,-0.0654769505075531,0.253240246418921,-0.25855  
6652954911,0.795977332042004,0.869368475249552,-0.00916600184669377  
"Eny2",4293.66097485725,0.915238007633687,0.17224735434146,5.313509813  
44733,1.07533641982552e-07,4.81867240885228e-06,11.2052700033847  
"Ebag9",1345.97464278928,0.570708539505994,0.166373793970043,3.4302790  
4748481,0.000602960816386332,0.00397986797491561,3.15402452872879  
"Sybu",107.956171409452,-0.748887471142421,0.309682224308025,-2.418244  
93742186,0.0155955749459933,0.0475275027996427,-2.28144578699526  
"Kcny1",6.91490645686535,-6.29920212165862,2.07394273823221,-3.0373076  
3898908,0.00238701703067829,0.0114300111858909,-28.1669630587222  
"Myc",872.741740988313,-0.640306155447184,0.245162736311,-2.6117597032  
9735,0.00900775430370887,0.0311959368747572,-2.22024073349188  
"Washc5",1888.23933187353,0.112659402074293,0.0770350939579956,1.46244  
25866959,0.14361996654823,0.259287232199758,0.152069781974406  
"Sqle",2515.11459799913,-0.389314891792547,0.26039335234196,-1.4951030  
3658321,0.134887553520146,0.24702146318548,-0.544371246611204  
"Mtss1",5524.2382504194,0.240007767405259,0.164265031169991,1.46110079  
361252,0.143987782475704,0.259782898372469,0.323508630484661  
"Ndufb9",11593.2470223499,0.555786981648856,0.44731152908974,1.2425053  
8048921,0.21405015655589,0.348725764749894,0.585504600326804  
"Klhl38",17.1200345031101,-1.28384450407717,0.509874237074854,-2.51796  
307937145,0.0118035693225032,0.0385375074765853,-4.18035599272609  
"Fbxo32",745.728647241441,-0.996974153766998,0.302321362515229,-3.2977  
2975840164,0.000974698944415257,0.00575376325104713,-5.14229414401291  
"Wdyhv1",670.664502358661,-0.356054283831905,0.160865629390847,-2.2133  
6456507323,0.0268725215919657,0.0723802218538675,-0.934935241368635  
"Atad2",678.791451595177,-0.518713702538861,0.234015290549087,-2.21658  
038379358,0.0266517792694286,0.0719546375235833,-1.36510891034269  
"Zhx1",2014.17278551223,-0.395272232107959,0.214581412981915,-1.842061  
83851195,0.065466105020703,0.142525470711664,-0.770083020596069  
"Gm29394",13.3748133772433,-0.272069510576482,0.956699192928948,-0.284  
383547710056,0.776116465769145,0.855191308976103,-0.0425598558181532  
"Tbc1d31",292.846068294789,-0.919685564987537,0.324370688049198,-2.835  
29184008158,0.00457838406223217,0.018559112774512,-3.666597219662  
"Derl1",6486.35429135119,-0.548230727388868,0.370753978838989,-1.47869  
141986189,0.139222806530685,0.253248090468821,-0.752932228130787  
"Slc22a22",2101.86375111593,2.41178942795708,1.00241114395274,2.405988  
2439523,0.0161287837264861,0.0488245653002679,7.28245052676202  
"Has2",15.8710086835833,-1.34343878097923,0.663813933962949,-2.0238182  
9040397,0.0429888515747884,0.103634597923494,-3.04541994222413  
"Mtbp",342.142403137069,0.0851441296121177,0.314099273838542,0.2710739  
46054026,0.786334159643399,0.861835909821113,0.0126601135211147  
"Mrpl13",2469.89199653598,0.604510634105113,0.252455467908714,2.394523  
83072843,0.0166419619571735,0.0499534670756096,1.81151487120137  
"Col14a1",2253.26708324022,-1.12300519990682,0.325212621764122,-3.4531  
4149806075,0.000554098271041638,0.003743523246282,-6.27504767439049  
"Sla",719.250820608295,-0.969851084094201,0.417878673435539,-2.3208915  
5476801,0.0202926974645644,0.0581094162379315,-2.75964100257144

"Lrrc6",6.87158785978782,-0.382662308370882,0.877979045804384,-0.435844465992119,0.662949579509106,0.771344486291237,-0.0993468652911687  
"Adcy8",51.7531788620989,-2.9945709663326,0.830953984619187,-3.60377472370503,0.000313628915390742,0.0023933998404261,-18.0723567519953  
"Asap1",1492.4359844638,-0.400353197642491,0.19881336517606,-2.01371370223504,0.0440396005838463,0.105541314181887,-0.900255338508591  
"Fam49b",1716.61055461691,-1.05261391457805,0.209042458578127,-5.03540726481006,4.76833933511749e-07,1.51440601952762e-05,-11.6818062459316  
"Wnt7b",681.450609186214,-0.79838886884116,0.433066372937787,-1.84357160641483,0.0652455971586304,0.142124751804153,-1.55769666102158  
"Ppara",548.393116642519,1.39284011119581,0.501755407801337,2.77593442848809,0.00550433083834673,0.0213536495595075,5.35760491430437  
"Gtse1",107.108429644829,-0.929542635643654,0.24525694040857,-3.79007678272077,0.000150600724466501,0.00136768184706467,-6.12999723854227  
"Trmu",1226.99805662258,0.349379944957291,0.17347814579209,2.01397094349865,0.0440125842235737,0.10552845144998,0.785676774071148  
"Brd1",3121.54017418822,0.130208111425681,0.11753908992975,1.10778560139868,0.26795441989841,0.410156639910441,0.116043570941134  
"Ttll8",6.23372114722878,0.0982949180863851,0.832434354658298,0.118081284771979,0.90600325228608,0.94269979257559,0.005800127609678  
"Tef",8962.20719969685,2.00865910068715,0.233704923541763,8.59485144876806,8.33725812671592e-18,1.8439802875533e-14,63.5223674274123  
"Zc3h7b",4610.25848613667,0.125907830887093,0.098382424361501,1.27977971374695,0.20062262037481,0.332178995590018,0.1387606674561  
"Rangap1",3385.55895154384,0.123350825667138,0.0968727747970528,1.27332809373487,0.202901641611423,0.334978554733704,0.134907412176551  
"L3mbtl2",926.819279245059,-0.0421487164518492,0.13893250415282,-0.303375489478599,0.761603722602869,0.845664505366508,-0.00706549739926178  
"Rbx1",4389.82439319685,0.417810650624939,0.137046070530127,3.04868756184505,0.0022984338551675,0.011125834982139,1.87951511145484  
"Xpnpep3",952.584540452144,-0.0244918012164847,0.223485294140218,-0.109590214025976,0.912734371985237,0.946353538447837,-0.00135045490796312  
"Stt13",9843.29531858904,0.069483484487076,0.192050965145915,0.36179711690037,0.717503650684241,0.812751186954124,0.014406028861466  
"Slc25a17",4029.75758717529,0.733900449170031,0.159506811338624,4.60106024947111,4.20345809607213e-06,8.70977959162747e-05,6.8608529222109  
"Adsl",1514.34585532458,-0.000432809979072616,0.140051378431742,-0.00309036572091691,0.997534248828849,0.998367315585527,-7.07219597696623e-07  
"Fam83f",242.625820666496,-1.49356936053618,0.397288031343337,-3.75941191957387,0.000170313224551589,0.00149854117883885,-9.71307464639562  
"Mief1",1556.7574069809,0.0949792780369907,0.109051635771589,0.870956931227764,0.383777669656095,0.528420950454034,0.0605836777813653  
"Tab1",1548.94853342286,0.318979395407377,0.147382808413247,2.16429174366789,0.0304419659827536,0.0795333582650046,0.8075214573506  
"Syngr1",757.668836658358,-0.191692778103524,0.312922011316372,-0.612589626716027,0.540147718919084,0.670900765924595,-0.0765111134955091  
"Cacna1i",12.727380385396,-2.29320147575447,1.04928399350566,-2.18549171620629,0.0288528126717217,0.0763638036477847,-5.89867939944839  
"Deptor",7835.1254574172,0.0686497237056612,0.375190494326751,0.182972

982374854,0.854819217660728,0.907625280140461,0.00665378334655757  
"Dnal4",1184.98517795451,0.253722392404139,0.12203914931351,2.07902459  
031686,0.0376150903501525,0.0935244875857272,0.601203322251158  
"Nptxr",326.204795964313,-1.10819336735764,0.161351230396994,-6.868205  
24783733,6.50146371837917e-12,2.8810349904763e-09,-21.7927513806799  
"Dsccl",42.4914888572657,-0.743187163627021,0.402457549981012,-1.84662  
249139589,0.0648018721568696,0.141474292163771,-1.45340450776765  
"Enpp2",6468.90613145267,0.933349500199577,0.380338985856207,2.4539937  
6584667,0.0141279430718261,0.0442658900874924,2.90975521656795  
"Josd1",1508.56784393845,-0.327845496200603,0.206322169178183,-1.58899  
791285865,0.11206086391757,0.214907320218823,-0.504078322241947  
"Tomm22",3598.95487089979,0.12633813563355,0.22934850729794,0.55085658  
5560541,0.581731990515383,0.706082404815144,0.043968618365828  
"Cby1",888.003737190265,0.425910239288453,0.134542217836168,3.16562523  
004551,0.00154750032970973,0.0082426806908815,2.04370032529768  
"Dmc1",45.5112927274724,-0.489401351341829,0.542613667946004,-0.901933  
327987105,0.367092285799347,0.512022704665259,-0.327598564623283  
"Ribc2",10.7885643471202,0.087758705195839,0.52007676833523,0.16874182  
9166404,0.865999715605976,0.915814650629735,0.00771761297636905  
"Smc1b",2.70595363728305,-0.904448862330847,1.34149277645792,-0.674210  
758494692,0.500177330735313,0.635504860854759,-0.410018812968687  
"Csnk1e",3505.59563722615,-0.506959136389478,0.23684590247333,-2.14045  
981414673,0.0323176250925164,0.0832402977614115,-1.26031242815788  
"Fam118a",540.074135746066,-0.808230395270261,0.214364840436532,-3.770  
34962274776,0.000163019007771175,0.00145072780169893,-5.28234324439021  
"Upk3a",2680.62512398563,-2.46459349858594,0.71370703438636,-3.4532285  
3753989,0.000553919504209099,0.003743523246282,-13.7714782646623  
"Sh3bp1",1190.39118204706,-0.735139469644145,0.269955618080956,-2.7231  
8640697333,0.00646555653355429,0.0242247158515068,-2.73499954069291  
"Samm50",8134.25494588914,0.0797772244416399,0.353755052745752,0.22551  
5434542717,0.821578319570134,0.885647443420974,0.00968785311104928  
"Parvb",835.241664331141,-0.583755848238411,0.218710178512961,-2.66908  
404632763,0.00760584154461226,0.0274119590456284,-2.09963896601377  
"Parvg",436.566201592267,-1.29417375937448,0.38769600744463,-3.3381147  
4589228,0.000843489087129496,0.0051718082455506,-6.81322032710571  
"Clqtnf6",709.594462909718,-1.38768085405828,0.32587314255472,-4.25834  
680078082,2.05944282332118e-05,0.000294607602121176,-11.2816597403147  
"Efcab6",4.95126263421543,-3.83471707092847,1.41291603923618,-2.714044  
54648382,0.00664672277031271,0.0247560268530195,-14.183415534493  
"Ttll1",371.918524464457,-0.0759700827893785,0.132025444934545,-0.5754  
20009582568,0.565007274655183,0.692644567194389,-0.0278991241620584  
"Myh9",19454.4224063638,-1.00989861333417,0.175343399316686,-5.7595473  
6402823,8.43397918011224e-09,6.968039239569e-07,-14.3170920632189  
"Cyp2d26",2961.57825841334,1.90803580598987,0.970935288441043,1.965152  
39347564,0.0493966020743498,0.115249872075022,4.12260272942544  
"Adamts20",16.5186704285897,-1.43682058638723,0.712896559135767,-2.015  
46853884253,0.0438555793083269,0.105269479488122,-3.23461611633609  
"Ndufa6",6650.16238221409,0.772060680586221,0.291660346178439,2.647122  
55437656,0.0081179926912104,0.02881045167332,2.73851239948891  
"Twf1",4279.75380240032,-0.0087012120085015,0.163722854078388,-0.05314



5982932447,0.957615594115367,0.974254571044165,-0.000226950605743511  
"Smdt1",6504.70722327323,0.540485200717018,0.25724009249233,2.10109238  
991637,0.0356328568082737,0.0897171283636002,1.30316039563655  
"Naga",3566.31221238252,0.188534817947642,0.168724071093302,1.11741505  
954645,0.263816899065431,0.405702492150625,0.170083889276083  
"Nell2",27.2759874334862,-0.611952082294809,0.493977248956101,-1.23882  
645119389,0.215409775879668,0.350364007070326,-0.641804723325792  
"Wbp2nl",0.601426376193038,-0.78109076708091,1.9580138527976,-0.398919  
939184746,0.689952196784794,NA,NA  
"Sept3",226.104441625789,-1.25260941577989,0.466950827456209,-2.682529  
59868105,0.00730676856529459,0.0266294156048811,-4.54163459058762  
"Slc38a2",7971.86330102677,-0.277057888303985,0.195310490238494,-1.418  
55098497612,0.156029964424547,0.276369208425674,-0.356301319335683  
"Sreb2",4869.19784086405,-0.168500606713577,0.0799323978110809,-2.108  
03893449845,0.0350276217786563,0.0884330660935182,-0.40869979343267  
"Slc38a4",104.376913400192,-0.0672191897658128,0.330317948038754,-0.20  
3498447979964,0.83874545863635,0.896904662858871,-0.00731383146712225  
"Rpap3",1046.50847542087,0.450250936901225,0.127977432481013,3.5182057  
3496836,0.00043447538086932,0.00308862728392595,2.60246326160682  
"Endou",254.079357671902,0.576044856558584,0.208261716836686,2.7659661  
3774343,0.00567544277954412,0.0218479335272559,2.20259330363159  
"Rapgef3",5480.66401527199,0.729194210674722,0.173014715892312,4.21463  
692792808,2.50180330339559e-05,0.000342076864022491,5.8193162395673  
"Xrcc6",1139.42308358643,-0.424408376920829,0.309419606960682,-1.37162  
728984643,0.170179493874685,0.294617451775549,-0.51865994429889  
"Desi1",1540.85741148847,0.0432222721890554,0.15948669031815,0.2710086  
47197042,0.786384381558489,0.861835909821113,0.00642673634749429  
"Pmm1",1743.46450553871,-0.363090041439871,0.367404495190186,-0.988256  
938042956,0.323026829156789,0.468073440522315,-0.275632569004023  
"Hdac7",4446.8506885378,-0.103999727788871,0.211358855162088,-0.492052  
853471011,0.622681980312631,0.740533897659999,-0.0312398406709395  
"Polr3h",767.322782358366,0.161293053723042,0.183603521324171,0.878485  
622496656,0.37968023673418,0.524440723706649,0.104102226030654  
"Aco2",26829.569807267,-0.193648619245583,0.525709219223622,-0.3683569  
01808887,0.71260712900675,0.809438708777626,-0.0409400724976026  
"Vdr",6537.82772515227,1.67210702688035,0.524777540539564,3.1863159104  
7347,0.00144097158510997,0.00779580021267317,8.11669197496123  
"Col2a1",9.37939444676961,-0.9178797853019,0.651544616235293,-1.408775  
02849387,0.158901701288508,0.279904722352817,-1.16874184802941  
"Hoxc10",1040.3926157532,-0.178656222719132,0.117782541320281,-1.51683  
110855386,0.129309330669316,0.239255392806066,-0.25551836539304  
"Hoxc5",354.914166128117,-0.578780991356861,0.278579598523102,-2.07761  
442124723,0.0377448868479088,0.0937754591947663,-1.36988899687742  
"Gtsf1",0.408927586926845,0.124646693396322,3.81533113091902,0.0326699  
542239463,0.973937784151395,NA,NA  
"Nckap1l",1772.94085133421,-1.20123243870482,0.413600213184466,-2.9043  
3225228795,0.00368037365039123,0.0157852893610489,-4.98352518078968  
"Pde1b",667.404081235077,-0.916279940407146,0.258971874993916,-3.53814  
459747289,0.000402949328414882,0.00290989111312347,-5.35074463996109  
"Ppp1r1a",4452.35847320858,1.72128413736868,0.555851332778569,3.096662

78708804,0.0019571237029117,0.00982492223464788,7.95720917509862  
"Glycam1",0.536461702703298,-1.53282331635614,3.70754842849241,-0.4134  
33120543062,0.67928931276694,NA,NA  
"Shisa9",48.4154860263194,-2.82137380689806,0.522018780536798,-5.40473  
621274086,6.49038391280888e-08,3.29556003989447e-06,-35.6140165891935  
"Tnfrsf17",10.5768622080906,-1.07573431894344,0.638204381190911,-1.685  
56398333726,0.091879811276568,0.18503124976973,-1.81501180713685  
"Txndc11",1674.72935544049,0.338267811436095,0.117179207342221,2.88675  
626937965,0.00389235621895822,0.016455585766966,1.38929644684915  
"Litaf",4116.13677302743,-0.898045320116042,0.154414574718071,-5.81580  
671225941,6.03421603314034e-09,5.52371569080612e-07,-12.9399753260728  
"Prm1",0.144806447373948,-1.12082276384184,4.77798187819239,-0.2345807  
90052278,0.814534120870031,NA,NA  
"Nubp1",1417.50772157502,0.298638879847691,0.115812350440135,2.5786444  
9441481,0.00991888070611666,0.0335469793595599,1.01382179388357  
"Ciita",2038.40607098064,-1.04707170639028,0.481572559560938,-2.174276  
09942086,0.0296844062450737,0.078024609458944,-2.67079825670246  
"Emp2",3032.24233241563,-0.900379287134968,0.232100744761184,-3.879260  
65494273,0.00010477443677675,0.0010276116540609,-6.1950758485114  
"1810013L24Rik",2815.05653075093,-0.0124891336644746,0.130566786426598  
, -0.0956532209015939,0.923795994778254,0.953075522841759,-0.0006002418  
89060643  
"Bcl6",3546.17474085961,-0.0722390696101149,0.26754421060891,-0.270007  
971563669,0.787154120884729,0.862534059177838,-0.0106827599881357  
"Trp63",487.578769720513,-2.79403194353317,0.65542181879594,-4.2629522  
9027624,2.01743604653222e-05,0.000290783946044037,-22.7516065898485  
"Clndn1",2551.26368899533,-0.880235451591257,0.460730035846807,-1.91052  
326331061,0.0560658740392372,0.126921213516434,-1.81697211744348  
"Il1rap",350.601920922822,-0.194869406592077,0.163218495055685,-1.1939  
1743273698,0.232510267600398,0.369748405323593,-0.193881903974361  
"Anks3",2504.22377205711,0.26720092661118,0.159326367662464,1.67706658  
057535,0.0935294629591587,0.187443464773119,0.447368633071075  
"Nudt16l1",2214.31082103661,0.229600258254249,0.163753039609999,1.4021  
1295497827,0.160881519085484,0.282498906621827,0.290233231931398  
"Mgrn1",4856.88164463189,0.291868836053662,0.124568276227152,2.3430430  
6757392,0.0191271750586831,0.0555220573610544,0.843785481240917  
"4930562C15Rik",21.4815157287255,0.689402971575117,0.516928448417844,1  
.33365260450487,0.182317734363937,0.310348504953185,0.806642429641887  
"Srl",145.579938980043,-0.901045946905924,0.416470933557148,-2.1635266  
0967223,0.0305006993646081,0.0796547865270732,-2.27969413620083  
"Crebbp",6266.16340208687,1.0368234127149,0.515962362816238,2.00949427  
213196,0.0444847415268868,0.106322536162412,2.3238095160144  
"Fgf12",139.979498101403,-0.653969509203832,0.617775862845685,-1.05858  
701923288,0.289787901180882,0.433503490657114,-0.546623965668024  
"Plaat1",44.8839750120848,0.122050775604226,0.483163913600355,0.252607  
390926093,0.800571618086256,0.872675429610657,0.0166222879282878  
"Zfp251",810.79959428021,-0.0842343209028633,0.1115289322765,-0.755268  
7825795,0.450087725525571,0.590804528901143,-0.0443300013383957  
"Hes1",3509.39228333429,0.293150037609234,0.216368113328786,1.35486709  
709287,0.17545990434434,0.30179638259343,0.351194542079657

"Zfp263",1525.19541652997,-0.12278285619038,0.13265148825262,-0.925604  
814599243,0.354651390381207,0.499710421278564,-0.0851777217945508  
"Atp13a3",4246.20702487561,0.201403572101242,0.167076280266781,1.20545  
879869751,0.228026234355653,0.364490532666545,0.203267502012008  
"Mefv",50.6047231451446,-1.46872944480753,0.554764765386202,-2.6474814  
8485073,0.00810938002967096,0.0287876964389303,-5.2107688846008  
"Glyr1",5120.09643119709,0.0391857624799744,0.112756016335438,0.347527  
021204799,0.728195422019809,0.821473868233177,0.0077060820700887  
"Tmem44",713.507414663792,-0.209422662053029,0.202330993037775,-1.0350  
4984040646,0.300645635811699,0.445270687964793,-0.169438199295475  
"Lsg1",1344.92364771022,0.12468823270576,0.134356799139466,0.928038130  
592331,0.353387790716158,0.498290074008074,0.0868544430542258  
"Rogdi",3871.31692471871,0.740967173290244,0.169257193230714,4.3777588  
3640133,1.19905920471878e-05,0.000195898824286807,6.32631269429437  
"Sept12",0.136930709172513,-0.671103770306161,4.78471990596623,-0.1402  
59781867135,0.888454739565252,NA,NA  
"4930451G09Rik",107.675447324123,0.278262762222534,0.288549142116369,0  
.964351375927201,0.334869791367105,0.479566007497306,0.204487995418887  
"Eef2kmt",1601.61891876307,0.627331711396282,0.196763080286169,3.18825  
925312767,0.00143132143171569,0.0077629778235306,3.04782166055438  
"Ercc4",979.547132053459,0.353285301153294,0.147342179129129,2.3977200  
77451,0.0164974672385772,0.0496477259172369,1.0608460532804  
"Gpt",2032.97597678277,-1.26559982002265,0.578587017905938,-2.18739754  
06555,0.028713515561081,0.0761278324574352,-3.25935154357029  
"Apod",239.666275700349,-2.66266055004859,0.641367309877573,-4.1515376  
7434273,3.30248886114543e-05,0.000419551884686937,-20.7057094284244  
"Adck5",1735.51055221504,0.649508031914292,0.243025906482167,2.6725876  
3197721,0.00752687123620574,0.0272400714308675,2.34022042045771  
"Cyc1",13268.4386822226,0.512291699203601,0.393947036936424,1.30040754  
510428,0.193461325309182,0.323675040404876,0.577872837985091  
"Sharpin",2712.56661475904,0.642983814784025,0.231979333143881,2.77172  
886942142,0.00557594587697413,0.0215329357712897,2.46788222980845  
"Maf1",4984.90705652449,0.546213350983048,0.131556130069181,4.15194146  
176095,3.29666597074904e-05,0.000419551884686937,4.24753163942531  
"Hgh1",599.477127780038,-0.030603965031987,0.135110028789432,-0.226511  
424105186,0.820803674964271,0.885129697165718,-0.00373432930134514  
"Dgat1",3909.81155546145,-1.55986672594824,0.557160986355071,-2.799669  
689999,0.00511549218526322,0.0202194897788058,-6.0852090302418  
"Hsf1",2360.64006917961,0.143182845428363,0.198067086853147,0.72290074  
8949387,0.46974086338467,0.607698276793034,0.0713160499530039  
"Bop1",1471.75540913244,-0.310226890072164,0.125599928058495,-2.469960  
73061191,0.0135127884892079,0.0427231812196955,-0.978149609796211  
"Mroh1",4771.96062820629,0.96268319991324,0.284446119487615,3.38441319  
448253,0.000713305698706547,0.00453473573960882,5.19462744547635  
"Fbxl6",2114.02373461808,0.287834448380643,0.172960174110748,1.6641660  
4204122,0.0960792521712122,0.19134670512103,0.475982699014907  
"Slc52a2",1771.75775043498,0.851045723611042,0.171355608432821,4.96654  
723702661,6.81554576347335e-07,2.02267140481284e-05,9.19853310747568  
"Gpaa1",2421.80887743233,0.225956730113827,0.119465648313068,1.8913950  
0186441,0.0585716352846415,0.131162253908343,0.458990457266696

"Oplah",5572.02049447018,0.876990249891267,0.251520982106726,3.4867478  
750506,0.000488932055950452,0.00340106929251585,4.98451913857201  
"Grina",16842.5769904334,0.95830883834039,0.188211450968711,5.09166064  
768134,3.54940954834205e-07,1.2227276921126e-05,10.8402374848928  
"Plec",8244.78445783343,-0.622411695913041,0.178843922978368,-3.480194  
82880794,0.000501049275398375,0.00346803648268283,-3.52544360187688  
"Scrib",3718.02403542057,0.295477080808396,0.257621922530297,1.1469407  
4908803,0.251406109806021,0.39140181483534,0.277163584859342  
"Tsta3",1447.89508351053,0.172612972127404,0.171525509958538,1.0063399  
4423995,0.314252071982911,0.459420176915558,0.134256655595264  
"Pycrl",1485.39836444171,0.582203691685909,0.200617906071064,2.9020524  
7920231,0.00370726429636843,0.0158692072998006,2.41228804363834  
"Naprt",1897.96081619926,1.01270309630635,0.249374284423324,4.06097645  
011079,4.88679011877672e-05,0.000569491712762559,7.56566819109429  
"Gsdmd",1709.35373439475,-1.1444437878177,0.238580708524649,-4.7968831  
8009778,1.61153521487642e-06,3.98247320908244e-05,-11.5943856835131  
"Ly6h",45.005569535618,-3.70444128618545,1.09567238193952,-3.380975323  
68935,0.000722290291225257,0.00458139755963242,-19.9511990408293  
"Gpihbp1",1236.12903717289,-2.3534951476909,0.650087924614903,-3.62027  
205640692,0.000294293415872598,0.00227571126228481,-14.3221067774649  
"Rhpn1",2486.38172711588,0.115396489607065,0.535463528016625,0.2155076  
55646496,0.829371543947287,0.891116237608652,0.013302953774405  
"Ly6g",0.526039523285424,0.899765651198382,4.37588020018041,0.20561935  
200175,0.837088259816394,NA,NA  
"Ly6f",13.9847010060125,0.853662228565457,0.6782209695345,1.2586786120  
0365,0.208146439728379,0.341354022868744,0.917546169501837  
"Ly6c2",348.543059255455,-1.8886443559915,0.439506062153075,-4.2971975  
1017611,1.72971063035308e-05,0.000256081229085985,-15.6191187830427  
"Ly6i",50.0522789585921,-1.25554198358849,0.748020330129332,-1.6784864  
4350536,0.0932521747572501,0.187003075533977,-2.10507962658488  
"Ly6e",24271.7108338047,-0.933146758219274,0.300501027397902,-3.105303  
05436749,0.00190084159377138,0.00959922543262223,-4.33546783509906  
"Gm9747",3.40821583400612,-2.37080378705034,1.38136727161297,-1.716273  
3154102,0.0861120299393784,0.175849639689778,-4.12075562974139  
"Lynx1",1452.83285195579,-0.361420556930587,0.226493795452516,-1.59571  
945981345,0.110551441949786,0.212598088089253,-0.559606172088676  
"Lypd2",142.922328559708,0.384044441638436,0.584175656305675,0.6574126  
07822674,0.510915647002573,0.645112892452801,0.168338181071364  
"Slurp1",125.020140362942,0.0737959986361152,0.914724033886008,0.08067  
56966061215,0.93569986509962,0.959820915915004,0.00302626747872347  
"Psca",3045.16694860871,-1.74906013151525,0.690790321569846,-2.5319696  
5403401,0.0113423806957759,0.0374076012865761,-5.74720407012059  
"Zbtb11",1073.39182698665,0.057631810174766,0.134738538190822,0.427730  
706808957,0.668847191024274,0.776058869034312,0.014611214147258  
"Arc",191.237129765969,-0.969677647464475,0.366843613317962,-2.6432997  
9386613,0.00821023042513215,0.029032113316871,-3.43203120541153  
"Mroh4",0.672425060946421,1.25756108794567,3.40860059281003,0.36893764  
8663888,0.712174200248152,NA,NA  
"Cep97",1099.26558402321,0.90034789711997,0.199971689648145,4.50237680  
495752,6.71977073464493e-06,0.000124073948659192,8.09829873581064

"Ptk2",2333.95432914733,0.0829838186190501,0.138374008739953,0.5997066  
88956318,0.548701729611123,0.678505127626474,0.0321863729594793  
"Mapk12",1146.40271418717,0.114390160402154,0.199409947934033,0.573643  
198783619,0.566209272867026,0.693725549978716,0.041830063201303  
"Miox",52814.3653414503,2.51714342155521,1.10309848054452,2.2818845877  
7741,0.0224961550003819,0.0630487322405413,6.95700010974242  
"Lmf2",2398.43370595137,0.166787331873228,0.126638654723007,1.31703335  
161004,0.187827445437607,0.316749656732612,0.19174597922541  
"Tymp",52.6121069044872,0.0326306927168596,0.384931135301941,0.0847702  
088095939,0.932444078190753,0.957752251771138,0.00140854119038589  
"Chkb",4731.76251894586,0.286039618793065,0.2448288342716,1.1683248815  
2008,0.242675742599024,0.381495737256774,0.27564368103213  
"Mapk8ip2",13.6377487637499,0.363420340409177,0.687310628091174,0.5287  
57050387075,0.596973995505035,0.719305337063229,0.119735860545715  
"Arsa",1202.76438035927,-0.881504581247871,0.181604202808579,-4.853987  
78010126,1.21003195665375e-06,3.19258499199389e-05,-9.12541875723709  
"Rabl2",778.107203878859,0.318019068687023,0.191203214201083,1.6632516  
8756092,0.0962620651114979,0.191604287476066,0.525470233228945  
"Acr",15.9992663144848,-0.644491383494438,0.488747071167183,-1.3186603  
4911538,0.187282688264176,0.316050755253476,-0.742358985786054  
"Shank3",1960.86033180674,-0.702955604682548,0.304565948512957,-2.3080  
571157568,0.0209959599561371,0.0597372285458575,-1.98078820390143  
"Kif21a",3661.91935266928,1.28926702269833,0.283265923132704,4.5514370  
6817971,5.32807352001633e-06,0.000104303993467147,11.8202590886922  
"Yaf2",1303.44947585186,-0.00278909243693219,0.155048484197828,-0.0179  
88517923036,0.985648013300511,0.990729196996256,-2.59777306821217e-05  
"Zcrb1",3066.88398031741,0.536982228719025,0.249919269738441,2.1486227  
5038262,0.0316643167574935,0.0819146673925445,1.34357099939986  
"Alcam",2463.1036459808,-0.737048729312479,0.185211041197082,-3.979507  
50964242,6.90581787906288e-05,0.000743509867509487,-5.3097937718025  
"Cblb",1049.15149208877,-0.46826334783803,0.148378924668351,-3.1558615  
8131735,0.00160024782945635,0.00846490292423761,-2.23447156053033  
"Bbx",2743.54163600604,0.803575109600717,0.306809316168829,2.619135297  
56877,0.00881529767380859,0.0306984593755885,2.79928829442347  
"Retnlg",3.51730271750802,-0.228042687519765,0.910907153959294,-0.2503  
46796079675,0.802319170291011,0.874026024376205,-0.0307048367583777  
"Morc1",18.2688114934012,-0.2358461241889,0.417581840947569,-0.5647901  
82575283,0.572216485391891,0.698408577913683,-0.0846572003067911  
"Nectin3",3700.04232309849,0.962242291001328,0.3182744897522,3.0233095  
0793607,0.00250026383342577,0.0118296879942091,4.26960662220278  
"Cd96",63.0334442085193,-1.26202155173363,0.484057459412604,-2.6071730  
2707219,0.00912932151520517,0.0315162023554303,-4.36312843298881  
"Tagln3",62.8951766549482,0.241922769396975,0.369163723177667,0.655326  
496641018,0.512257564693768,0.646514207806271,0.105517060384312  
"Gcsam",133.29305546292,-1.39021132457852,0.539568452628499,-2.5765244  
7582162,0.00997991396561935,0.0337183092187916,-4.71241919151038  
"Cd200",1871.60909165928,-0.0172043759275489,0.201720638060764,-0.0852  
881296278989,0.932032328331756,0.957507809105404,-0.000747038127385533  
"Atg3",2896.78304990202,0.18135428735919,0.148470865008151,1.221480640  
99468,0.221904091007851,0.357784335274215,0.186400450372869

"Slc35a5",1437.90595434566,0.22835044036397,0.138048634513459,1.654130  
38070802,0.0981010244485688,0.194427096432018,0.373969062161883  
"Ccdc80",3838.25968413524,-1.9685143267058,0.461696288746583,-4.263656  
37906673,2.01108638357324e-05,0.000290783946044037,-16.0294744057421  
"Cd200r1",183.2790764312,-1.77192681909301,0.40010736324657,-4.4286283  
6793395,9.48342686089269e-06,0.000164070857971327,-15.4427181650864  
"Gtpbp8",869.227034601681,-0.21954448992875,0.20270459860828,-1.083076  
02015982,0.278774681776335,0.422562290119642,-0.189119665617862  
"Mzt2",847.831301104738,0.435383306090306,0.206172636207663,2.11174147  
112217,0.0347086298748074,0.087866910769301,1.05882258865327  
"Prkdc",970.72835353528,0.0518902450038951,0.16526976317776,0.31397300  
9981766,0.753541537885925,0.839812582812826,0.00905881879624399  
"Mcm4",783.850389679472,-0.772178307864634,0.222897129090195,-3.464281  
08345968,0.000531650670526389,0.00363341211844498,-4.33777580833478  
"Ube2v2",1400.76231322753,0.117718298651567,0.15388049674758,0.7649981  
71566001,0.444272633403456,0.58553655577265,0.063005972132647  
"Snai2",339.700080893412,-1.16070520179786,0.252384721722733,-4.598951  
92496239,4.24621747229945e-06,8.76113738358674e-05,-10.8440041050902  
"Fopnl",1388.9875109394,-0.0850076226916248,0.192793899901867,-0.44092  
485672469,0.659267397928175,0.768252194884268,-0.0224111734088263  
"Nde1",1429.78332555554,-0.567788472499382,0.132552577239563,-4.283496  
28746345,1.839791699219e-05,0.000270734026802808,-4.66402667859155  
"Mpv17l",12162.6362641039,2.35140590916595,0.684635364285892,3.4345376  
1203028,0.00059356569320225,0.00392716114219799,13.0264089137134  
"Pdxdc1",4013.25014157393,0.203278823110502,0.151030187179498,1.345948  
29620986,0.178319191681218,0.305302600300028,0.241180538201147  
"Ntan1",1531.38686282565,-0.317203747586665,0.156502544163476,-2.02682  
805753833,0.0426799999974068,0.102991910884831,-0.721037370395612  
"Rrn3",1340.99002914544,-0.122518514088313,0.154517899825623,-0.792908  
227633028,0.427831293370602,0.570849861403586,-0.0686874373826737  
"Bfar",3496.6696622781,0.273159128019634,0.161258547761623,1.693920302  
59026,0.0902804284208409,0.182451056524622,0.464718338076742  
"Parn",1081.63538272738,-0.146611464350101,0.123353706434635,-1.188545  
27024521,0.234618655466525,0.372493652331757,-0.144783993795491  
"B3gnt5",71.6179476292587,-1.13014885375131,0.401847504313719,-2.81238  
241277969,0.00491759999317404,0.0196241024696904,-4.44261147155115  
"Boc",685.991555374009,-0.815011614480743,0.144687672594627,-5.6329029  
2714964,1.77201211075358e-08,1.26097416552823e-06,-11.0708129473742  
"Sidt1",244.103014484704,-2.56185785883559,0.614485261668473,-4.169111  
96841327,3.05788746475363e-05,0.000396955324818684,-20.0636684163613  
"Naa50",4142.74399729922,-0.298849956650352,0.245851922481615,-1.21556  
892308906,0.224149178512571,0.360301787521691,-0.305070010464072  
"Ccdc191",1425.91915812648,0.617002785846031,0.25122023373856,2.456023  
45266558,0.0140483988864444,0.0440804122124063,1.92612213028462  
"Hira",1594.43423329368,0.324812314555987,0.132299511819418,2.45512859  
487599,0.0140834198493465,0.0441618720203534,1.01337982440341  
"Qtrt2",800.027682236032,-0.287763451618958,0.177661588964444,-1.61972  
800815459,0.105290716935116,0.204981322839246,-0.456057996196024  
"Drd3",0.510567350266936,-0.0814421193884972,3.06028907875025,-0.02661  
25576024851,0.978768757289289,NA,NA

"Mrpl40",1264.58781480373,0.0606547436246994,0.22469488352395,0.269942700400805,0.787204335977528,0.862540609322273,0.00896920181015405  
"Gbe1",2080.86733634817,-1.84647884920976,0.701227402617204,-2.63320977234791,0.00845820891967897,0.0297096302496668,-6.49274409825846  
"Zbtb20",36902.9474452588,0.914671448455843,0.242883388043681,3.76588722605988,0.000165958693388866,0.00146817722490749,5.96707288929836  
"Usp7",5550.87666680638,0.0297674159396817,0.113469880351026,0.262337598731879,0.793061177171558,0.867106310351093,0.00424464571304853  
"Pmm2",2500.36893700829,0.135686267988482,0.129756178225562,1.04570179119033,0.29569873557637,0.440083500974586,0.111370039790838  
"Tmem114",0.620744376399948,0.0676153978943893,2.27699606259992,0.0296949999189655,0.976310299651507,NA,NA  
"Dgcr8",1497.80111642877,-0.34172310662696,0.145175345061285,-2.35386460753858,0.0185793769341221,0.0542793963832054,-0.995648053603648  
"Trmt2a",2243.16706312636,0.207087974598662,0.213054775551763,0.97199405205704,0.331053507599286,0.475848233775959,0.153795191515383  
"Arl6",868.444995771884,0.649331667919121,0.200941411488224,3.2314477295148,0.00123164848331191,0.00689902586318475,3.23131791568945  
"Crybg3",826.29984959961,-0.688941730604334,0.214378037193674,-3.21367682820013,0.00131047078351823,0.00722668523476335,-3.39646538549506  
"Riox2",1164.70855996669,-0.0392592642370749,0.122890099477939,-0.319466453390922,0.749372825967863,0.836746727793002,-0.0069973297940307  
"Gsc2",0.223225755326959,-0.743285423935834,4.78007376619995,-0.155496642999869,0.876429800251749,NA,NA  
"Cpox",3240.25682256846,1.03265667630308,0.248763167363161,4.15116388510819,3.30788786450894e-05,0.000419630433195805,8.03007891630965  
"Clndnd1",1387.75782240505,-0.579133404309982,0.178587234974278,-3.24286001960552,0.00118336335480191,0.00668788947592104,-2.89998557826548  
"St3gal6",1724.74810004269,-0.434515278622288,0.235383234242656,-1.84599077338851,0.0648935451388288,0.14159515925659,-0.849383203444622  
"Cmss1",329.388592735972,-0.0801859630302531,0.243656233015805,-0.32909465125422,0.742084146962721,0.831943232375755,-0.0147535012015726  
"Tbc1d23",2066.08312718638,-0.108063743440084,0.128912381735084,-0.838272801926474,0.401877507472056,0.545859118125402,-0.0654211810090676  
"Klhl22",1786.05767382381,0.0339479930813353,0.0846706270643264,0.400941793610955,0.688462978593569,0.791162324312925,0.00795238928857982  
"Nit2",3466.27629029998,1.40153755010895,0.270441134678037,5.18241262290774,2.19033985671171e-07,8.2456588118601e-06,16.4061514715353  
"Tomm70a",3852.57304856217,0.294015548965073,0.163604933138342,1.79710686789901,0.072318655621698,0.153786579486516,0.550452819267544  
"Tmem30c",6.66923528220499,0.412559061654087,0.727843212926836,0.566824082888795,0.570833706781245,0.697419363044095,0.148673240912485  
"Tmem45a",316.537978365031,-1.25398892846552,0.422856776063564,-2.96551693019818,0.00302174712881713,0.0136063859114169,-5.38866134257001  
"Adgrg7",1.22566776228978,-2.08434980977541,1.54359244580419,-1.35032392484241,0.176912101303836,NA,NA  
"Slc7a4",328.097863120067,0.269556028030934,0.201631980911892,1.33687139714569,0.181264618759527,0.309125886333083,0.316460579136386  
"Tfg",2038.72788031775,-0.042019215052774,0.182843185043536,-0.229810124138721,0.818239317336424,0.883341465557035,-0.00521220808299009

"P2rx6",170.498256175648,-1.59037150733365,0.441623213672179,-3.601195  
44919165,0.000316757328901622,0.00241161046424202,-9.58590146022933  
"Lrrc74b",8.41192723660891,-0.103999126971738,0.821203872825342,-0.126  
642275338924,0.899223535422171,0.938249076559186,-0.00662888617243116  
"Thap7",1026.08859971847,0.501882917174433,0.116595757427545,4.3044698  
0445505,1.67386119484956e-05,0.00025009153698986,4.16245809879205  
"Lztr1",6083.54909509945,0.834190202678054,0.18394904545334,4.53489824  
109827,5.76312642369883e-06,0.000110599841544567,7.59913231468198  
"Ncam2",20.1298872624028,2.30770816210951,0.864863297843487,2.66829239  
703397,0.0076237877533034,0.0274512675187276,8.29700224025233  
"Aifm3",859.579985079997,1.50158469257505,0.414825218305488,3.61980088  
556054,0.000294829801186531,0.00227847461891993,9.13601529440784  
"Snap29",1940.04155362074,0.0542187547976201,0.224209736955903,0.24182  
1588722009,0.808918409915106,0.878121647011892,0.00704681941283125  
"Serpind1",10.844501654008,-0.727002939313815,0.565302243341657,-1.286  
04290514805,0.19842808828531,0.329552884615585,-0.806986667355673  
"Ccdc116",75.6251836008576,-0.352288990592747,0.318102244514786,-1.107  
47093636547,0.26809037125419,0.410235917337482,-0.313897549802102  
"Sdf2l1",1090.86879007731,-0.639497395862961,0.341659795346391,-1.8717  
3733805761,0.0612429511893261,0.135701368838274,-1.27726726941851  
"Dlg1",3552.1569960715,0.123263578408339,0.131986072947849,0.933913523  
262745,0.350348502478065,0.495306507749544,0.0866023400805146  
"Ppil2",3041.43272587286,0.0323137597729379,0.0887227870739905,0.36421  
0377498509,0.71570091828263,0.811559273102535,0.00674704367221979  
"Senp5",1509.69377135211,-0.00425661753733707,0.0952442966233805,-0.04  
46915740705062,0.964353149906854,0.978482952401665,-9.25895806158912e-  
05  
"Ypel1",155.721404391447,-0.329204932229154,0.250511651109881,-1.31413  
022416572,0.188802384576721,0.31800871583249,-0.377162350687104  
"Ncbp2",2825.59325282579,-0.157492172462163,0.131549782195096,-1.19720  
587776111,0.231226319452653,0.368157012631703,-0.157373386676115  
"Top3b",3170.32174055837,0.480480678598037,0.145076663584455,3.3119087  
9860792,0.000926617485239898,0.00554378267174211,2.49613470778833  
"Meltf",64.9667351643844,-1.05360489528122,0.484649828428364,-2.173950  
82692566,0.0297088283159175,0.0780580286257599,-2.68701148518721  
"Pak2",4150.52347597305,-0.116138963413487,0.0802700083103595,-1.44685  
376092702,0.147937885893169,0.265118832642004,-0.154183431548965  
"Spag6l",48.1634998664081,1.31279058056221,0.512161615325161,2.5632350  
0488951,0.010370182982668,0.0348737198682407,4.40575373604988  
"Wdr53",640.355054042483,0.123042855108119,0.134043324688308,0.9179334  
77062226,0.358653693941009,0.503675433913986,0.084385644465531  
"Fgd4",2863.9422454362,0.587509412219169,0.241033099646058,2.437463622  
55595,0.0147907023197267,0.0457397484266506,1.81234174410146  
"Dnm1l",4534.90772175431,0.0239895650634903,0.111220749424322,0.215693  
251373149,0.829226862029293,0.891058989024368,0.00276706794483651  
"Igsf11",2717.40270989299,1.56907726053838,0.368506893787646,4.2579319  
0572594,2.06326771133271e-05,0.000294652042427947,12.7561515923181  
"Tnk2",2379.28651617479,-1.00649905029934,0.213406535399888,-4.7163459  
5638474,2.40118011019576e-06,5.49509504560997e-05,-9.87281921711345  
"Yars2",744.252448235747,0.46451036772997,0.226355132809674,2.05213092



349244,0.0401569403811895,0.0981546976999415,1.07822634151701  
"B4galt4",718.617143958404,-0.342139564611413,0.124949835699724,-2.738  
21540216855,0.00617736009554132,0.0233876052704592,-1.28492192924638  
"TfrC",2230.52178943544,0.809105059539132,0.255197096740097,3.17051044  
026241,0.00152171364335743,0.00814225373715235,3.89235221540358  
"Arhgap31",1291.5109882137,-0.621760547518525,0.254726084741409,-2.440  
89861527028,0.0146507671980013,0.0454584116528692,-1.92183536576113  
"Fytd1",2547.19816275962,-0.0890492999443957,0.125529095135165,-0.709  
391713917083,0.47808142833616,0.615532995886056,-0.0432126622839126  
"Lrch3",2313.66579254162,-0.393240427996517,0.145730376151087,-2.69841  
084873631,0.00696713963331681,0.0256695146896677,-1.44022387347875  
"Lmln",440.119218698346,0.912486652479443,0.288362826500415,3.16436991  
394981,0.00155419122113694,0.0082683821090663,4.37566223023296  
"Popdc2",51.6202985054296,-2.26227709270019,0.574484347571488,-3.93792  
642438997,8.21887858972506e-05,0.000849690852292997,-15.9957423279997  
"Maats1",74.39053916936,0.324951643014353,0.261323450256974,1.24348443  
545656,0.213689372972748,0.348312606104552,0.34271184550175  
"Osbpl11",1758.11923887438,-0.440450833237863,0.317384957233376,-1.387  
74955523174,0.165213320390303,0.287971420785887,-0.548314615956659  
"Snx4",1836.15229428461,-0.184731360106969,0.116825398576553,-1.581260  
25982201,0.113818542106005,0.217589437453355,-0.281742166792377  
"Nr1i2",300.371963736699,1.33472033698991,0.657961275423222,2.02856974  
543278,0.0425021327271556,0.102664343894212,3.0382111022407  
"Zfp148",2271.43957120675,-0.0426976446549152,0.148543910959035,-0.287  
441231210683,0.773774494621053,0.853786279311295,-0.00674940348985669  
"Gsk3b",3438.52754103377,-0.00540364781219187,0.189015593861965,-0.028  
5883704184643,0.977192887356466,0.985481892917987,-7.90257882262355e-0  
5  
"Umps",1120.61993645807,0.313183406542631,0.129720535244757,2.41429320  
309014,0.015765769721329,0.047901231264627,0.951643505610145  
"Fstl1",9191.03766831157,-0.885044729809498,0.28184702972401,-3.140159  
86145446,0.00168855664628166,0.00882666956815008,-4.18624166545213  
"Itgb5",9948.64627479024,-0.415314501041335,0.248288727878899,-1.67270  
783732035,0.094384825621584,0.188924682267698,-0.692082929384557  
"Cyp2ab1",16.480896590225,-2.3647059833993,0.705442617012373,-3.352088  
3575394,0.000802044167840409,0.00497083826590982,-12.5427949403493  
"Ndufb4",2455.97925876329,0.904519412700593,0.266952693799489,3.388313  
48665838,0.000703238387194981,0.00448242630713558,4.89127084797979  
"Hgd",7898.03662265207,2.29886827008704,0.983713839375002,2.3369278524  
6126,0.0194429358286328,0.0562043532671137,6.61789246906164  
"Abcc5",4457.61803086582,-0.541857567690904,0.211480162440745,-2.56221  
463723685,0.0104007019362568,0.034970320116078,-1.81698690913502  
"Muc13",5.45409843118074,-1.52445569935768,0.802749747006036,-1.899042  
26696221,0.057558918903303,0.129579009441935,-3.1151710613305  
"Rabl3",417.633751034017,0.139223124843134,0.115556271795067,1.2048080  
3577706,0.228277417109469,0.364742528788038,0.140415372499484  
"Gtf2e1",503.474191628115,-0.749073727513394,0.237754269785527,-3.1506  
2155640409,0.00162923444570164,0.008583305382948,-3.56404500228381  
"Stxbp5l",65.5647188036736,1.63298799997751,0.638293144367722,2.558366  
81685671,0.0105165095025995,0.0352866808263095,5.46111962894002

"Hcls1",1784.30386371204,-1.34034147517719,0.297653425704412,-4.503027  
21027046,6.69923026008725e-06,0.000123901469933686,-12.0577439522646  
"Ccdc14",268.832532747128,0.0491102403593415,0.14969540305859,0.328067  
792035805,0.742860405723081,0.832478429265397,0.0090042627904267  
"Mylk",19417.7807795189,-0.334588647272382,0.272812227179683,-1.226443  
00342158,0.220032011572839,0.355799705406477,-0.34575966943055  
"Iqcb1",918.975807573179,0.160148337201603,0.260469767556321,0.6148442  
43553044,0.538657587497395,0.669812533151446,0.0641806323547265  
"Eaf2",488.289339317098,1.38886830473573,0.321335953875045,4.322169019  
64168,1.54502754849216e-05,0.000237391230421593,11.5912185095389  
"Adcy5",772.534488494487,-1.5839821763732,0.404152299944325,-3.9192704  
7450035,8.88173981405142e-05,0.000900904965479376,-11.1070584984473  
"Ap2m1",13401.0570848392,0.0960670602181736,0.0969348866439446,0.99104  
7326140085,0.321662471606829,0.466927849269652,0.0731628027903272  
"Ece2",27.7356078753837,-2.28105836557029,0.634619578574632,-3.5943712  
4630411,0.000325175900205819,0.0024632011275109,-13.7007060424841  
"Clcn2",975.383838903438,0.835139731976035,0.218934390801831,3.8145662  
2195077,0.000136422351773691,0.00126725250828176,5.5711370631999  
"Pdia5",804.455306437009,0.256271280740216,0.235017555939845,1.0904346  
2610858,0.275521735945486,0.418944303787341,0.222960446306477  
"Thpo",434.326766175476,1.00567954860859,0.266370530298763,3.775491033  
0381,0.000159692769488659,0.00142895347383657,6.58801859962472  
"Slc49a4",1483.08301693141,-0.12796750286229,0.224301192178283,-0.5705  
16374075161,0.568327519638125,0.695272303796221,-0.0465100072443873  
"Hspbp1",392.979229297842,0.270622846341366,0.175547900426361,1.54158  
976372883,0.123173314585844,0.231015129645516,0.39653609941272  
"Ehhadh",13774.066495656,1.91560651441484,0.592533531215521,3.23290820  
434276,0.00122536930475769,0.00687151300091038,9.54043106277665  
"Senp2",2611.88611000183,-0.404308569883736,0.133319874019518,-3.03262  
040155053,0.00242440359949331,0.0115597306871762,-1.80330828798523  
"Tmem41a",639.23531818221,0.433423690223746,0.251638011926893,1.722409  
45199355,0.0849953726690332,0.174244535411714,0.757319302726555  
"Tra2b",6075.17369890127,0.0452956098693426,0.161976259109859,0.279643  
511452017,0.779751021033312,0.857497366018682,0.00696361894925215  
"Chodl",45.7818622041059,0.0554779083285909,0.416873015482379,0.133081  
073296134,0.89412926331702,0.934584130811368,0.00375328180103208  
"Dgkg",162.654229158727,0.583084634884143,0.419992548029479,1.38832138  
241466,0.165039203954518,0.287778071785476,0.726270209733563  
"Btg3",847.785484892363,-0.502590086285905,0.153335793570911,-3.277708  
84137029,0.00104653282403835,0.00608931572757378,-2.56382238062176  
"D16Ertd472e",500.487572778312,-1.34565028229283,0.20558142689666,-6.5  
4558294786645,5.92637530726887e-11,1.60489535751567e-08,-24.1512228628  
326  
"Cxadr",1862.12168067149,-0.100510616431699,0.192589412524244,-0.52189  
0664259884,0.601746458765931,0.72340171730798,-0.0325443913461251  
"Usp25",1940.13428917924,-0.56105417862349,0.155532797990089,-3.607304  
60632003,0.000309394367211167,0.00236386025544017,-3.39295230739714  
"Ahsg",25.5294112688829,0.819123218724093,0.741421229943253,1.10480140  
794833,0.269245650322149,0.411519298422925,0.727298983482743  
"Fetub",109.759704553464,0.845406306406062,0.347530700380333,2.4326089

910355,0.0149904791832088,0.046167171554921,2.60003551825219  
"Kng1",293.556177564135,1.73920586103283,0.417124168468151,4.169515919  
9715,3.05247294316358e-05,0.000396516438679571,13.622839595217  
"Samsn1",168.681557097827,-1.09356491108336,0.386703693261429,-2.82791  
431822208,0.00468523445244045,0.0188901367563449,-4.34048528341853  
"Hrg",76.3793530416127,2.47999770178056,0.767147987870926,3.2327500573  
4334,0.00122604781312966,0.00687334107544625,12.3506488620314  
"Adipoq",7592.80993078841,-3.73876695398592,1.61610724872086,-2.313439  
8765584,0.0206984667876273,0.058971721559066,-10.5833173185296  
"Rfc4",244.061522586727,0.408011481184597,0.228992025050654,1.78177157  
52081,0.0747864893798661,0.157863697080073,0.753198698887392  
"Robo1",287.129703394696,-0.798648273086115,0.235496737315513,-3.39133  
476832889,0.000695530876685374,0.00444201147514295,-4.32599654730386  
"Eif4a2",23609.0921063226,-0.157921939945735,0.0996318202105125,-1.585  
05525254944,0.112953781178538,0.216266770631009,-0.241816799412736  
"St6gal1",1719.04767519908,-0.904317554264641,0.302523022005028,-2.989  
25201880871,0.00279661356197495,0.0128362455817767,-3.93873921299847  
"Masp1",153.545503054279,-1.02049242644345,0.343352673855287,-2.972140  
61269713,0.00295731209056088,0.0133910058387729,-4.40155936346522  
"Mrpl39",1418.46224019742,0.0435114920623635,0.277118333330094,0.15701  
4122954233,0.875233717653033,0.922100125725339,0.00352884575452266  
"Atp5j",11477.2943987305,1.12490104968683,0.202416520591001,5.55735789  
945615,2.73888796897382e-08,1.73264480341006e-06,14.9227815587058  
"App",30484.783492425,0.740084808010058,0.230491785120448,3.2108945124  
5871,0.00132322498696916,0.00728820361466797,3.64232603645788  
"Adamts1",5274.3166643952,-0.714607435082759,0.239235570165124,-2.9870  
4508944688,0.00281688173379578,0.012898910297217,-3.10897999983643  
"Adamts5",3784.40840124265,-0.527571972409897,0.232616062793651,-2.267  
99459192074,0.0233295363002965,0.0648715485999973,-1.44309195813586  
"Ets2",3995.20876384727,-0.803697489819866,0.150033078027385,-5.356801  
9825146,8.47078680303481e-08,4.02362491182574e-06,-9.98459700019964  
"Dyrk1a",1905.99236359199,-0.234205365689431,0.127014385750355,-1.8439  
2786931835,0.0651936529067934,0.142075091581162,-0.457028244558601  
"Vps26c",1491.13795032732,-0.4617575541027,0.167044786760564,-2.764273  
95944159,0.0057049618618683,0.0219312591448557,-1.76384103827002  
"Slc15a2",4362.42188137509,2.05355164166159,0.676286919792428,3.036509  
47779958,0.00239334584329652,0.0114516459515572,9.17859920160025  
"Ildr1",1111.48919959096,0.0527421688023214,0.207678301946657,0.253960  
901586476,0.799525764006564,0.872022897947082,0.0072224913040029  
"Cd86",616.245250567691,-1.0401759695166,0.421028266910646,-2.47056088  
929381,0.01349013512028,0.0426720724489325,-3.2809340832006  
"Stfa2",0.251703376073965,-0.551680863350111,4.78471990596017,-0.11530  
0555558728,0.908206898028326,NA,NA  
"Kpna1",1511.67891482465,-0.185634713153171,0.207314843434539,-0.89542  
4129202724,0.370560406814716,0.515716403431358,-0.12292698596553  
"Parp9",1601.52204632464,-0.795737593602377,0.220191814779446,-3.61383  
820919694,0.000301697365054559,0.00231776801569495,-4.8278598332546  
"Arl13b",768.431745893057,-0.356376182423178,0.151776080169787,-2.3480  
3917734937,0.0188725361252919,0.0549711247939859,-1.03382850114799  
"Pros1",2994.35783543452,-0.83863259129972,0.234773660712426,-3.572089

76831076,0.000354143968693445,0.0026285112682089,-4.98259938985927  
"Psmg1",1244.32648915379,0.368280983543173,0.239748658522064,1.5361128  
0168761,0.124510717082346,0.232873857234684,0.536680541094561  
"Brwd1",4194.48638479716,0.0989855986547826,0.159004795860912,0.622532  
15771787,0.53359200523401,0.665769304284426,0.0402685351418897  
"Grik1",11.8637019174573,-1.02606525608477,0.676937466719095,-1.515745  
99801336,0.129583591712203,0.239558250801605,-1.46620484708044  
"Fam3b",21.9423655220658,-1.7705004550299,0.562364735790219,-3.1483134  
3850542,0.00164215507981791,0.00863038807177616,-8.41424287405002  
"Pigp",1534.08547747769,0.375102262199039,0.165958475592026,2.26021756  
864741,0.0238077510054037,0.065807134831778,1.02066338861938  
"Ripply3",277.597586661205,-0.265697947911524,0.161357532547868,-1.646  
64111873861,0.0996318334758317,0.19678094500727,-0.431935621528105  
"Chaf1b",236.854639948855,-0.291181519508527,0.37015217828634,-0.78665  
3534923349,0.43148471123044,0.573606661183004,-0.16184200126347  
"Dop1b",1178.96645318525,0.00109775498891821,0.184130743339817,0.00596  
182347937563,0.995243181270461,0.996930467424169,3.37477684634392e-06  
"Cbr3",226.044284099012,-1.29815147711313,0.250146023021375,-5.1895747  
189321,2.10774915171053e-07,8.05821430589255e-06,-15.2257831593938  
"Setd4",344.858511492378,0.00781703809117145,0.259429994412757,0.03013  
15894828045,0.975962107398849,0.984902912378384,0.000118914415494452  
"Clic6",93.185008588416,-1.58964207195265,0.553842353856647,-2.8702067  
6711211,0.00410203466932159,0.0171156584597544,-6.46628487481734  
"Rcan1",3325.69021733116,0.49147208967543,0.197881084073278,2.48367392  
960831,0.0130034815218966,0.0414081141130066,1.56498397129282  
"Runx1",1060.19836473113,-1.39087902768774,0.351852235573723,-3.953020  
29393049,7.71708892285927e-05,0.000807663981846001,-9.90495646201295  
"Atp5o",12306.8269425078,0.79770088569146,0.304633554627392,2.61855883  
429242,0.00883020630601265,0.0307284245144806,2.77804691822331  
"Itsn1",2082.74561911366,-0.42327325538591,0.279208479413769,-1.515975  
64756852,0.129525510275496,0.239533106835844,-0.604884418442455  
"Donson",436.473985173865,-0.439016377283597,0.245978443360005,-1.7847  
7581729009,0.0742976873671535,0.157138117831084,-0.812456934909006  
"Son",26477.1664948773,-0.159631077526576,0.141853751865258,-1.1253215  
0491306,0.260452820146141,0.401890694055215,-0.145515720674761  
"Gart",2564.57655341823,0.582365165794505,0.209781589914972,2.77605468  
635521,0.00550229527198652,0.0213500006394414,2.24018612698904  
"Tmem50b",2066.99308780368,-0.518821745834908,0.226727718520641,-2.288  
30312067765,0.022119874911575,0.0623032719938642,-1.4401149652044  
"Ifngr2",2182.05528520851,-0.779664534685667,0.242895913217417,-3.2098  
7094578156,0.00132794579023751,0.00731213979611719,-3.83456118251243  
"Ifnar1",2928.2080863277,-0.442920370553073,0.186652776055642,-2.37296  
428112613,0.0176459702878786,0.0522095794648038,-1.30771764873262  
"Il10rb",2779.33255783299,-0.327273610979493,0.157105924596907,-2.0831  
3984223823,0.0372384786310879,0.0927655367764088,-0.778151945244048  
"Ifnar2",3113.05017768199,-0.824902401363758,0.239448741827484,-3.4450  
0620495252,0.000571046282814298,0.00382095416002512,-4.59244210713374  
"Cfap298",1290.55046656686,0.531167885806482,0.132709816516214,4.00247  
622783493,6.26829676970469e-05,0.000688559157271561,3.8673852110624  
"Synj1",2109.45564886339,-0.0450272426820255,0.121665408676213,-0.3700

90752761583,0.711314871956661,0.808370774226904,-0.00957884555929312  
"Paxbp1",4221.8596208658,0.234412067173266,0.16709262714773,1.40288695  
662208,0.160650550985459,0.282245849983283,0.296525821784613  
"Mis18a",388.37354208925,-0.715278139774534,0.234381601645913,-3.05176  
743716909,0.00227498287186471,0.0110369783616865,-3.22340377992299  
"Sod1",21124.3177934395,0.809219193951443,0.385891917397022,2.09700995  
918731,0.0359926937369083,0.0903780479693802,1.94516377178492  
"Scaf4",2355.36425008295,0.0152834367989991,0.170517195199779,0.089629  
8861888562,0.928581334238002,0.956091596063947,0.000686250135149079  
"Krt75",1.40563516846807,-1.75363023016981,1.73239574567645,-1.0122572  
9429685,0.31141504817892,0.456539143563352,-1.37498785602339  
"Zfp641",1196.45146449049,0.297572713660143,0.233335883369772,1.275297  
69259095,0.202203894140353,0.334257865871013,0.326092835509198  
"Lalba",1.61401089164752,-3.38007065024165,1.99770792870126,-1.6919743  
8808739,0.0906508570942184,0.183023914066839,-5.73982795759736  
"Kansl2",2393.04545775858,-0.0465208800966887,0.118054655802587,-0.394  
062222962911,0.69353510078302,0.795537557069497,-0.010641056804572  
"4930415020Rik",25.4332186749877,0.73062357803207,0.504357828084669,1.  
44862146941718,0.147443322154805,0.26449994437155,0.971666699042847  
"Adcy6",11029.1611713064,0.200934162398565,0.163744020579447,1.2271236  
6343218,0.2197761151115,0.355529303280846,0.207795582762763  
"Enah",3067.1628223279,0.0246319560153529,0.211955601295465,0.11621280  
9969651,0.907483884655087,0.943183410607936,0.00144083440258548  
"Wnt10b",62.1462922557584,-1.04651826983162,0.381261910704604,-2.74488  
020032624,0.00605329908286175,0.0230072564361868,-3.9474099995223  
"Wnt1",0.391792154252236,-2.45213200592348,4.63638300165379,-0.5288890  
07885849,0.596882447668391,NA,NA  
"Lmbr1l",2237.40912377643,0.472098383345258,0.24450491951408,1.9308338  
8376597,0.0535035986223487,0.122392393474921,0.991653538750728  
"Dhh",92.1113219642044,-0.834096400651221,0.336500929307251,-2.4787343  
1543967,0.0131849477280566,0.041869724886262,-2.64674825067895  
"Tuba1b",14272.6933714313,-1.27991813056287,0.241062366015576,-5.30948  
962178596,1.0993264318128e-07,4.88261201992845e-06,-15.6531814467583  
"Prpf40b",3393.70306991745,0.322464181539112,0.207373234735516,1.55499  
422068804,0.119947445746254,0.226402255291429,0.479001829456581  
"Fmnl3",2808.16151733173,-0.568233978595955,0.210620666969452,-2.69790  
228457671,0.00697779193157429,0.0256849135514132,-2.0807884359575  
"Nckap5l",706.98399931408,-0.44790876579581,0.257176903789747,-1.74163  
682350727,0.0815720136400319,0.168824023134842,-0.79678418225007  
"Tmbim6",71904.4168601121,0.899599779259371,0.269588355484238,3.336938  
56191785,0.000847066706883472,0.00519047977712568,4.73273069616551  
"Faim2",11.5984416269144,1.31422578107958,0.730044320566374,1.80019999  
341956,0.0718290648851501,0.152995751270555,2.46725536647731  
"Aqp2",5646.71826119541,2.0646475547684,1.14519785089553,1.80287410874  
364,0.0714079880480868,0.152365173009586,3.88458314090225  
"Racgap1",426.357910699472,-0.705461688272947,0.313969017678845,-2.246  
91497743435,0.0246454613325608,0.0676527108351782,-1.90006783320758  
"Asic1",27.4149490962386,-0.304648774154565,0.618941684754967,-0.49220  
9171975826,0.622571481165453,0.740499506463554,-0.0915257261981776  
"Smarcd1",1537.73823372555,-0.0906638309094112,0.123954122036799,-0.73

143054397574,0.464516214421173,0.603406872004266,-0.0458000639044042  
"Gpd1",24084.166694952,-1.6412553957821,0.794454148143625,-2.065890649  
09179,0.0388388060068195,0.0958459738667215,-3.84876493562143  
"Cox14",3623.13344854754,0.157869030493171,0.193232757028343,0.8169889  
66679263,0.41393473333393,0.557382557358078,0.0922749941218173  
"Cers5",2399.32582595654,-0.140156453127605,0.105286940270099,-1.33118  
554654598,0.183127965984006,0.311274438214293,-0.163573837876713  
"Lima1",4615.46758680736,-0.638565063652612,0.151924997748448,-4.20315  
993494319,2.63214471694068e-05,0.000353210995808048,-5.0755992603911  
"Larp4",2692.45909268369,0.212206815545782,0.190595712577349,1.1133871  
4117015,0.265542195213202,0.407487936586417,0.1905073848492  
"Dip2b",1016.84727227866,-0.401535294455585,0.143082382415596,-2.80632  
239746531,0.00501105277784465,0.0199195733052834,-1.57243327259943  
"Atf1",1401.19234976489,-0.519358642866505,0.150814242604812,-3.443697  
58383771,0.000573817145509507,0.00383029329104566,-2.89013419564873  
"Slc11a2",2867.50480945116,0.457383711956222,0.21405909798255,2.136716  
99202203,0.0326210171047257,0.0838666391756252,1.13363804895864  
"Cela1",2742.95357883303,1.61837675565324,0.527892740455745,3.06573027  
364621,0.0021713910087245,0.0106483354849372,7.35123639358373  
"Slc4a8",683.726401788272,0.406907028624417,0.231170125313993,1.760205  
94387672,0.0783728945577159,0.163644752418756,0.736525055661391  
"Scn8a",35.0613523065729,0.107903468538092,0.438575628480544,0.2460316  
11268338,0.805657762194991,0.876455674121405,0.0142291383925142  
"Nr4a1",2123.57166479139,-1.35785125989325,0.55997060304617,-2.4248616  
8471472,0.0153142201523584,0.0468533915786419,-4.15601864031022  
"Pcdhgc4",2197.40067046251,-0.705757397689138,0.169973202878258,-4.152  
16861092293,3.29339461252158e-05,0.000419429184552225,-5.4884041689910  
7  
"Krt7",11408.7746955124,-0.512615865923256,0.312884157490511,-1.638356  
73251945,0.101347299378033,0.199381459315194,-0.826611234580043  
"Krt18",5671.32857339311,-1.56182945487652,0.367974471369137,-4.244396  
21875224,2.19182776933856e-05,0.000308120099831026,-12.6274238106498  
"Csad",9619.64722741192,0.492608720085771,0.348030230592944,1.41541934  
229824,0.156945581781934,0.27763790179497,0.63124729946694  
"Soat2",147.800620782979,-0.410290611258307,0.290825633478319,-1.41077  
870733459,0.158309874743219,0.279190117379096,-0.523474324969955  
"Igfbp6",747.405323704023,-2.93109879011765,0.664738948443183,-4.40939  
830136668,1.03658222619524e-05,0.000176068399660679,-25.3382879944979  
"Amhr2",21.8348037304299,-1.05512923489944,0.65275091400805,-1.6164347  
107853,0.106000358722177,0.205877461884435,-1.66760446210216  
"Prr13",4734.59241995025,-0.140330160004079,0.153823958193488,-0.91227  
7655913417,0.361622573528424,0.506423787711954,-0.0954780356514851  
"Map3k12",1079.23377288565,-0.305099793458848,0.235028098130868,-1.298  
14177915427,0.194238620056992,0.324655331109621,-0.343234576375449  
"Tarbp2",1677.85982263564,0.0468785070680063,0.112690021721473,0.41599  
5190628965,0.677413522465914,0.782784567006214,0.0114804413155234  
"Npff",383.453593625331,0.0514242191919334,0.239867659866432,0.2143857  
95986706,0.830246217336957,0.891712060462487,0.00589383264530617  
"Calcoco1",3266.7315126536,-0.142434491012077,0.180592821699599,-0.788  
705163757864,0.430284349164166,0.572841593544606,-0.0793568142709964

"Fabp2",1.78297789671913,-2.2770776942997,1.8820924636491,-1.209864944  
61849,0.22633072061523,0.362469950476403,-2.31080964779281  
"Sncg",566.637324685265,-0.614595215713843,0.278875332383177,-2.203834  
99129061,0.0275359507663038,0.0737352710903564,-1.60241813735603  
"Rttn",357.484506384041,-0.0666024221918896,0.234987499511658,-0.28342  
9639152296,0.776847510720667,0.855664487856263,-0.01038178130918  
"Cdkn1a",2397.83643455725,-1.88465233116936,0.255599163537648,-7.37346  
83051565,1.66245225610165e-13,1.66632367440301e-10,-42.433382822235  
"Nus1",10033.2307573795,0.979092483048413,0.262926036797691,3.72383235  
594798,0.000196221249875541,0.00166997901792811,6.26124181213121  
"Rgn",146.216320111465,1.34757441060316,0.393326986290303,3.4260919224  
3055,0.000612333113994908,0.0040253779692086,7.43205677408466  
"Cep89",1488.55879946097,0.697270406990068,0.233847321702965,2.9817335  
5979568,0.00286621325557955,0.01305734253675,3.02504118083591  
"Slc10a2",1815.35684626479,1.16279600822366,0.607470668235763,1.914159  
92413377,0.0555997246738644,0.126056212987327,2.40818232003585  
"Mospd1",790.004108764026,-0.26793573405309,0.24093154087311,-1.112082  
43255375,0.266102709271373,0.40788893218698,-0.240274147113403  
"Akirin1",1836.90350927811,-0.710534634081005,0.232003726528939,-3.062  
60009143593,0.00219423080431814,0.0107384496840819,-3.22151042110921  
"Cxcl13",131.672172406315,-1.84527149117629,0.715581737047536,-2.57870  
120999707,0.00991725249685044,0.0335469793595599,-6.2643432574508  
"Gtf2ird1",1120.86500587115,-0.260109790504119,0.248803500051706,-1.04  
544265032471,0.295818433325696,0.440218027277462,-0.213416222626208  
"Lrrc71",54.5761040562543,-0.328942223389528,0.477079816110814,-0.6894  
9096625191,0.490514356208272,0.627027399026348,-0.153538730287492  
"Noct",34808.6584521778,0.401319153882408,0.177030400084427,2.26695049  
94115,0.0233932497918,0.0649803804045465,1.09707408908642  
"Abcc1",1747.98213592139,-0.473917441304508,0.114522472882172,-4.13820  
475036463,3.50033936853888e-05,0.000440320109727556,-3.66243804951338  
"Ndufa5",4606.50046558019,1.16306189351087,0.283133778783427,4.1078175  
0771076,3.99415491151196e-05,0.000487089909119285,8.87074497811918  
"Fhl1",6602.7631112999,0.254240173617786,0.265248851450393,0.958496793  
586812,0.337812307563949,0.482398152400899,0.185337390828273  
"Msrb2",1221.1205446314,0.755587841579316,0.209429085202645,3.60784578  
153606,0.000308749910416091,0.0023598611341799,4.57066608322037  
"Rfc2",2227.23809939106,0.359661866668241,0.142391656280396,2.52586335  
50831,0.011541436223288,0.0379165835689419,1.17694551625209  
"Denr",2947.42101289449,0.239272345353837,0.187401387950457,1.27679067  
893079,0.201676157183535,0.333555154191582,0.262708365109403  
"Prmt5",2231.56395027751,0.237182532479173,0.170806980016969,1.3885997  
6597917,0.164954488575257,0.287681808429371,0.295505774487145  
"Sympk",5201.17715537337,0.322082909226945,0.17741076272129,1.81546431  
730827,0.0694525847681716,0.14920521130562,0.612741046868641  
"Ldc1",2069.48005972486,1.66925457353069,1.1114444098762,1.5022840523  
2986,0.133023765481626,0.244319647641367,2.35244354608856  
"Sult1c2",1851.44178393886,1.61286667201323,0.639448820316892,2.522276  
40550489,0.011659804951411,0.0382008232774158,5.26584551338755  
"Gzma",32.0178659322905,-1.62943867826,0.399754474169694,-4.0760986644  
2247,4.57975928356045e-05,0.000540945058729681,-12.256951957691

"Reg2",67.0392948448351,0.897176369588096,0.483885390375388,1.85410923  
213054,0.0637235341741772,0.139636038360093,1.76628544449694  
"Nagpa",717.260570402237,-0.340917416379102,0.166885099469612,-2.04282  
717547938,0.0410695493912474,0.099959315195424,-0.785130090704073  
"Wrb",700.825791729579,-0.544425595605579,0.170691376935668,-3.1895319  
2234642,0.00142503399511289,0.00773533208148972,-2.64697376125195  
"Ivns1abp",34948.2231112527,0.863001534145602,0.292935574119567,2.9460  
4551440841,0.00321865035204275,0.0142565298873534,3.66822274765105  
"Lrrc69",2.14097976175493,-0.30414859389993,1.52373730185721,-0.199606  
975250405,0.84178797210871,0.898810682885693,-0.0324474397395633  
"Tmem52",131.874326137194,0.831180796261927,0.37036327773237,2.2442311  
2720843,0.0248175342607346,0.0680484155555904,2.23382817422772  
"Rpp14",1156.54862395716,0.138586827769831,0.23719624261804,0.58427075  
5051544,0.55903816466245,0.687686419683884,0.0518900030015916  
"Psg29",0.843793669448328,-0.443044065137224,2.33230729457126,-0.18995  
9559003423,0.849340820700029,NA,NA  
"Ssxb2",0.712598244232669,1.06770108835828,1.959386493454,0.5449160193  
3835,0.585811278136668,NA,NA  
"Slc38a1",707.753919795945,-0.95185479534377,0.276208024015514,-3.4461  
5185868136,0.000568630719527494,0.00381133096230563,-5.30161877216838  
"Gps2",2195.22374337169,0.168716471591965,0.225256282039457,0.74899785  
2865261,0.453858499563073,0.594154224820787,0.087836554565531  
"Bsg",21052.758821782,0.30384029690926,0.244812146615522,1.24111610109  
952,0.214562862360301,0.349298379418981,0.319587964768978  
"Cpn2",29.2058111653616,-2.66741854373216,1.16845376148975,-2.28286187  
408157,0.0224385058974773,0.0629233407146572,-7.37764785707457  
"Vwa5a",2628.00787269879,-0.57552107352725,0.142452554531824,-4.040089  
52607921,5.34308018845648e-05,0.000608169162373172,-4.26176663451184  
"P3h3",1624.94853369827,-0.663251396345978,0.25168662413261,-2.6352270  
3533312,0.00840810229298967,0.0295709196444287,-2.33528418668789  
"Grm2",0.283857027812607,-0.104382380122923,4.02357622999715,-0.025942  
6873398635,0.97930305191893,NA,NA  
"Il15ra",1033.69472385233,0.209676159476304,0.307498735105743,0.681876  
494237285,0.495317049809393,0.631262947720998,0.0964579080871878  
"Epb42",37.8828254354764,0.00829095382769162,0.486550104571413,0.01704  
02878342712,0.986404475387189,0.991182975731778,7.34257170546242e-05  
"Serp1",10013.3112968035,-1.46056602930048,0.316639913318344,-4.612  
7034775684,3.97465131106988e-06,8.35105078267678e-05,-13.715500933718  
"Serinc2",2222.28009822142,-0.347955808249129,0.216773615974537,-1.605  
1575588854,0.108459134871898,0.209496057303787,-0.5438724511215  
"Ccl25",441.432171895245,0.69720299969494,0.163433502804276,4.26597354  
723465,1.99032363502998e-05,0.000288101931965958,5.68373565172039  
"Scg5",292.694422122974,1.30918445045688,0.517423926707404,2.530196967  
86695,0.0113998510522579,0.0375532188040405,4.29673837050626  
"Kcnk5",4290.51767931795,1.50519621277811,0.529699130542059,2.84160597  
21257,0.00448869311372947,0.018267697418388,6.02472989102365  
"Guca2a",95.4153650011525,0.558843209951435,0.359120175090487,1.556145  
40400194,0.119673520384711,0.22609529290143,0.830887368438964  
"Parp3",3050.61669405854,-0.965304801684306,0.225371767549802,-4.28316  
648610832,1.84252198298264e-05,0.000270931324466029,-7.92867113588477



"Slc26a6",549.984798682262,0.521007239150186,0.255153837737128,2.04193  
377521115,0.0411581009049972,0.1000374783652,1.19946827379532  
"Acy1",3413.21325639993,1.95145657641168,0.485984367303415,4.015471911  
65785,5.93269645492383e-05,0.000661004088446314,14.2880782282493  
"Frs3",713.762711403336,0.915879384266246,0.257553487690728,3.55607447  
788103,0.000376437403158412,0.00275418185169263,5.39877453598908  
"Gabrr2",38.5402494545739,1.40439523100971,0.377619198601404,3.7190779  
3939289,0.000199951352727178,0.00169500673184033,8.96013786840639  
"Creld2",1995.80658853183,-0.156470056256468,0.197265319818594,-0.7931  
95967747188,0.427663656438461,0.570745104259898,-0.0877503745869442  
"Cd4",515.358088730752,-1.74548618252857,0.518951438930661,-3.36348654  
534089,0.000769645877996533,0.00480825226823979,-9.31639567877031  
"Twf2",1518.45312848679,-0.729046683495878,0.190292761405941,-3.831184  
52908801,0.000127527813255063,0.0012029691837674,-4.90135348361568  
"Bmp15",35.8513954092242,1.02535724010779,0.313183677327648,3.27398046  
046658,0.00106043943783238,0.00616287575524763,5.21826013172477  
"Zfp605",187.0668299474,-0.19249399967742,0.198296523369196,-0.9707381  
4712842,0.331678690497654,0.476465859229593,-0.142707199049506  
"Ube2j2",2274.04865664776,0.196660386404127,0.101606572460741,1.935508  
51722818,0.0529279245066809,0.121426137544981,0.414648419144525  
"March5",3540.60250126843,-0.322314725092236,0.322536678808594,-0.9993  
11849687368,0.317643646907799,0.462678606559709,-0.248415249462198  
"Ache",330.262080421715,1.15469827976225,0.410264016872774,2.814524872  
4563,0.00488493973148668,0.019529742645997,4.54468078628478  
"Dtwd1",338.649957568444,0.196553635578813,0.133081729952576,1.4769392  
8872773,0.139691912084734,0.253864563503416,0.269466065385853  
"Gcm1",81.2781461862214,2.11772313717421,0.400195184658394,5.291725683  
76079,1.21167544798032e-07,5.29714078132741e-06,25.7268278079895  
"Wfdc1",264.752649735186,-1.30158931443703,0.248070638615886,-5.246849  
53325903,1.54722160049616e-07,6.37221589562125e-06,-15.5716461337826  
"Mx2",272.269918518646,-0.680410335287583,0.378756230218366,-1.7964333  
8116261,0.0724256188967136,0.153980451122901,-1.27299985370874  
"Poc1a",157.133754008622,0.149238300036424,0.306137944433117,0.4874871  
04262009,0.625913179364593,0.742700533790825,0.0443927777655448  
"Trip6",2977.34963759161,0.190157820502013,0.131165327568867,1.4497567  
6138324,0.147126360977915,0.264004213726062,0.253250324627418  
"Clec4n",229.001615587144,-1.3624752475112,0.540437892097608,-2.521057  
95584208,0.0117002579533866,0.0383028256506266,-4.44470981855437  
"Agap3",3224.61220588394,-0.0772683475875314,0.126942522477084,-0.6086  
87664934972,0.542731484646579,0.673252225959982,-0.0305700813198927  
"Tmem176a",33829.6336888987,1.15819573502945,0.456009111820587,2.53985  
217621076,0.0110899330642221,0.0367702351085434,3.8255976366599  
"Kcnk16",0.271161112340423,-0.542973133656971,4.78471990596049,-0.1134  
80651810061,0.90964950160498,NA,NA  
"Dlx2",0.39108001921673,0.88206772639745,3.8559629136816,0.22875420385  
0801,0.81905996299954,NA,NA  
"Slc17a9",143.000955018624,-0.804201725254697,0.388370964459347,-2.070  
70507027793,0.0383863661228168,0.0949867275521609,-1.89310542302606  
"Stk31",0.619917886113063,1.90256827595876,3.08566568664514,0.61658276  
3386562,0.53750996651257,NA,NA

"Nfatc4",1013.77390179875,-1.21745735010945,0.251521373405191,-4.84037  
333935899,1.29595433300262e-06,3.37512266435095e-05,-12.535542052678  
"Cela3b",0.658791083092537,2.08829768018679,4.25703472826583,0.4905521  
83265249,0.623743213170837,NA,NA  
"Gnb3",7.43523872293619,-0.222315779175428,0.819491568753406,-0.271285  
01091672,0.786171833915397,0.861748280733214,-0.0330788246825634  
"Pisd",2129.89393732174,-0.320705097006644,0.164305761579618,-1.951879  
79973082,0.0509524770927005,0.118089689321436,-0.685125782950835  
"Tpi1",21076.1245754422,0.569134829059145,0.382790376112895,1.48680548  
042643,0.13706619364813,0.250188788967538,0.788558780930427  
"Rab12",2373.94636295802,-0.575500657509457,0.114903221692429,-5.00856  
850689486,5.48363571169435e-07,1.69445212530296e-05,-6.32220045973782  
"Tulp2",5.41505750262103,-3.52049925448493,1.24175833967881,-2.8350920  
9641831,0.0045812476828413,0.0185591455059297,-14.0355003487498  
"Celsr3",11.4462074567793,-2.27477070731319,0.798259218957386,-2.84966  
418588224,0.00437654106350148,0.0179423460168528,-9.14592413589856  
"Prph",57.0406823416997,-0.0165843730285179,0.635927995156288,-0.02607  
9010760396,0.979194318355339,0.986683763270925,-0.000222325010810915  
"Pcbp4",3034.53207367086,0.614920729431256,0.198904407149557,3.0915389  
8721256,0.00199121831886011,0.00995762369354565,2.83442595372175  
"Cdca3",251.954476825111,-0.0845054830217622,0.343183293749985,-0.2462  
40083829156,0.805496388195746,0.876377912897755,-0.0111511638519637  
"C1qtnf12",1887.47132564232,1.21283078103294,0.310949819648663,3.90040  
67678936,9.60312028278716e-05,0.000960357102143514,8.42699733508735  
"Ccndbp1",2134.75221837826,0.177013611247217,0.101071745811394,1.75136  
592156561,0.0798828991752465,0.166129533107255,0.317737215092154  
"Ogfod2",1697.38686832862,0.68131932806124,0.167563426467382,4.0660384  
0960405,4.78190579995092e-05,0.000559985581305964,5.10144627528046  
"Mrps23",2118.72310874709,-0.585485500606489,0.362230502992786,-1.6163  
3406289406,0.106022105978542,0.205877461884435,-0.925344688606371  
"Rhebl1",463.899946292964,0.565616404759229,0.226316484485459,2.499227  
60175947,0.0124464344660312,0.0400264851094633,1.82027458505062  
"Sfi1",2477.99859081928,0.0620289154824506,0.16730413628004,0.37075542  
1005397,0.71081970745472,0.807944418794408,0.0132284112837173  
"Hes7",60.3820231754476,-0.278944521092345,0.371867482352184,-0.750118  
077891426,0.453183592556703,0.59370917742865,-0.145432099866163  
"Pigx",974.779442728979,0.19467832216081,0.193262671905498,1.007325006  
12433,0.313778616781126,0.458968902475499,0.151610186295346  
"Pisd-  
ps2",131.983526762756,0.037274196165584,0.18217922610208,0.20460179221  
9154,0.837883255036838,0.896388779904753,0.0040770908626087  
"Tiam2",257.432221977965,0.419835209130166,0.154841292534962,2.7113904  
9704955,0.00670016675970585,0.0249122523800047,1.55019765082235  
"Nox3",0.578006930376695,-2.36137682810029,2.91937182394188,-0.8088647  
04637674,0.418592972861674,NA,NA  
"Synj2",669.961328735068,-1.62071069250445,0.242510877308388,-6.683043  
29476932,2.34030396176339e-11,8.00548186780045e-09,-30.2151351996173  
"Rsph3b",5112.74361704564,0.694957847177841,0.23801855422036,2.9197633  
3296455,0.00350297301242732,0.0152423494301066,2.90747956325787  
"Rps6ka2",373.072065141293,-0.106328660975019,0.269027927750623,-0.395

232799300976,0.692671088683072,0.794780255819605,-0.0244225887040892  
"Prkn",515.472004888798,0.970696307583292,0.319035454757143,3.04259696  
879836,0.00234546235376629,0.0112918086354902,4.35228940296978  
"Agpat4",755.186603651229,-0.739160841128647,0.292882769963069,-2.5237  
4300209552,0.0116112779731319,0.0380944188104775,-2.4153466377148  
"Slc22a3",296.081668373221,-2.83685733224341,1.01827734041795,-2.78593  
77987131,0.00533731122906286,0.0209072208777343,-10.9720015675931  
"Slc22a1",8313.3198129506,2.19010847453754,0.743444826268774,2.9458924  
1481353,0.00322024384867461,0.0142571104817115,9.30905501001161  
"Igf2r",3981.69183042379,-0.0632432854097582,0.241431067331338,-0.2619  
51728536094,0.793358657994379,0.867334292883342,-0.00900146754969746  
"Acat2",5373.20121448722,-1.22218037361336,0.62120274922262,-1.9674419  
9078772,0.0491322773974178,0.114852073455803,-2.64493313060855  
"Lnpep",4096.04659891291,-0.325254335229905,0.186721703249292,-1.74192  
035296324,0.0815223820092496,0.168739214906194,-0.578757844782722  
"Chd1",1738.73470368804,-0.136361026165479,0.152859465059693,-0.892067  
927309765,0.372356524541215,0.517624947633296,-0.0897943273027817  
"Mpc1",14114.2018933902,-0.395261331622555,0.604377254965077,-0.653997  
694942035,0.513113290677443,0.647049731058646,-0.172069954776103  
"Pde10a",174.380900873985,0.242471713249871,0.368226463306394,0.658485  
300248818,0.510226339647537,0.644576465624444,0.106484318965264  
"1700010I14Rik",83.5911323461036,-0.0865651309763425,0.214058637822521  
, -0.404399149022498,0.685919225870462,0.789160770985108,-0.02049734301  
00659  
"Zfp54",302.684654084331,-0.057575644181065,0.194806245202796,-0.29555  
3379826853,0.767571181237275,0.849837719005984,-0.00936812538074665  
"Phf10",2143.25340254143,0.289760689258338,0.110923913536952,2.6122472  
6047742,0.00899491725800609,0.0311736396545686,1.00494292969471  
"Thbs2",1907.72095603343,-1.7096413249377,0.326091121151674,-5.2428331  
0413256,1.58129561710906e-07,6.47584112469157e-06,-20.4258235687769  
"Smoc2",4722.27320065085,-1.31055091066194,0.440475542148366,-2.975309  
14944764,0.00292693413311228,0.0132765409462539,-5.66388209991892  
"Zfp51",375.99062925321,-0.131958067211083,0.122336781437172,-1.078645  
89586945,0.280745613170329,0.42460269667973,-0.11303546229395  
"Zscan10",0.757876871647182,-1.30412941088521,2.01538643874897,-0.6470  
8652683737,0.517575944646772,NA,NA  
"Mmp25",80.5353637908778,-1.84511836887788,0.468544110440023,-3.937982  
20437576,8.21696868783999e-05,0.000849690852292997,-13.0461640125625  
"Hcfc1r1",2744.54457744727,0.0397531939051497,0.240139863817251,0.1655  
41835800333,0.86851752383637,0.917552810997049,0.00342056917636296  
"Tnfrsf12a",1640.09919944965,-0.449767374337159,0.281248377091444,-1.5  
9918211435909,0.10978014326506,0.211562675184049,-0.698593972436278  
"Clcn6",179.484401240412,-0.28540415704056,0.637191611007289,-0.447909  
470417203,0.654218533287545,0.764516209891552,-0.0766344554506588  
"Pkmyt1",529.725113921249,-0.734990528440505,0.25121607011589,-2.92573  
053985536,0.00343648449583517,0.0149999047906412,-3.08674811969851  
"Paqr4",709.102564759376,-0.711059087970713,0.24232101597843,-2.934368  
21853704,0.00334227446128634,0.0146774025779642,-3.00169769026275  
"Flywch2",229.264172264624,0.359161084782139,0.254002289454444,1.41400  
727353111,0.157359766882847,0.27806785704928,0.459686718503425

"Slc25a27",478.995639928541,0.138061437844962,0.196050575264235,0.704213377894374,0.481299901074916,0.618818692460186,0.0662616141945931  
"Pla2g7",1750.51682503746,-0.855544351585785,0.168653516403314,-5.07279284672523,3.92019181817123e-07,1.31559208383309e-05,-9.61515381379105  
"Mep1a",32602.893938188,1.95865470204106,0.738956103071984,2.65056976172001,0.0080356130479704,0.0285805149962289,6.96307639615369  
"Tnfrsf21",6728.58305171556,1.52136372085683,0.291861528252634,5.21262164960619,1.86190391506307e-07,7.26068050717993e-06,18.0023531989746  
"Adgrf4",35.82111903725,0.399400315633623,0.290978188967919,1.37261255577358,0.169872826489824,0.294412485406923,0.488376115200981  
"Cenpq",194.387928856555,-0.0276054794232261,0.172550398212905,-0.159985022979573,0.872892872180263,0.920379906001015,-0.00229039220013445  
"Mmut",6321.65092230512,0.317239758337883,0.430318774481922,0.737220351865477,0.460988358906484,0.600265388635653,0.161913908748821  
"Tbc1d5",1007.26838632171,-0.32710968445442,0.113658251355831,-2.87801088396419,0.00400191331669728,0.0167841053665226,-1.33700292029134  
"Rhag",1.77650970587815,0.876601990663127,1.65852593052751,0.528542831033288,0.597122627552822,0.71937360670923,0.288730286547443  
"Satb1",459.039745622854,-1.01843649661956,0.274394404350543,-3.71157895522713,0.000205970398622674,0.00173253271455776,-6.47539334133652  
"Crisp2",1.67105676624272,0.168470667968794,1.44343835924021,0.116714833640332,0.90708603507378,0.943127331475567,0.00986462768282925  
"Efhb",36.0414406624659,-0.709805729538151,0.45506871030249,-1.55977704787994,0.11881257719146,0.224801039537503,-1.05941311470914  
"Cdc5l",2209.83519057798,0.0837267093241627,0.0719296244611718,1.16400870922604,0.244420482334622,0.383589066690314,0.0802255462118352  
"Spats1",30.5351185646817,0.99660429595711,0.286855805001756,3.47423436646509,0.000512313342061158,0.00352846539862539,5.62771705903939  
"Aars2",1100.50122830551,0.150347794400087,0.182793889783462,0.822499015575356,0.410792946717931,0.554300406581745,0.0887124889180401  
"Mrpl14",1644.61359077007,0.598647318768764,0.215407565789337,2.77913784771249,0.00545033904579884,0.0212137895290915,2.30665029428915  
"Sgo1",59.9487000953482,-1.22331178798938,0.490265939802956,-2.4952004385233,0.0125885998065219,0.0403306800899711,-3.92761719296166  
"Slc29a1",3241.50205181307,-0.206873280666101,0.213522295663273,-0.968860324508415,0.33261488341497,0.477453897020871,-0.152938866572444  
"Sult1c1",0.179410683008769,-0.0649340025024865,4.78471990596461,-0.0135711188488881,0.98917214616915,NA,NA  
"Hsp90ab1",69278.2675079032,0.181485556739923,0.123028916742412,1.47514553119168,0.140173421645936,0.254573526010847,0.248302292169439  
"Slc5a7",1.65511322561672,-4.17091985762976,1.51945778046296,-2.74500542973884,0.00605098965346705,0.0230029628121077,-15.7332613214434  
"Nfkbie",1138.13046691651,-1.00201283936758,0.401480953421999,-2.49579172019738,0.0125676369760444,0.0403165162485875,-3.21745727677281  
"Tcte1",1.91373421936495,-1.44925292610843,1.55811578866795,-0.930131724900506,0.352302886639537,0.497335772060359,-1.01228850721798  
"Vegfa",14599.2421859381,0.246223375261572,0.231004397961521,1.06588176430557,0.286477093353357,0.430599010654005,0.207462397025968  
"Gtpbp2",5140.02128241173,-0.342290342877846,0.141007227856547,-2.42746664891586,0.015204684733322,0.0466353536149617,-1.04925557256648

"Polh",367.488535428499,-0.288285494958926,0.125848023914842,-2.290743  
12008268,0.0219782751192396,0.0620072939191049,-0.801578757679153  
"Clic5",4362.8613270481,-0.106646498389688,0.26875176859922,-0.3968215  
68637662,0.691499044360999,0.793748588603183,-0.0246341154306979  
"Enpp5",4409.0979771288,-0.225040825990402,0.306448293861587,-0.734351  
701406587,0.462734415111108,0.601934460326666,-0.114232233181749  
"Enpp4",1527.12825670191,-0.577138721146172,0.162186199289518,-3.55849  
464180318,0.000372986398738046,0.00274019924739805,-3.40495953568956  
"Cyp39a1",402.119557438468,-0.128736457598762,0.340306796315946,-0.378  
295288229393,0.70521124526446,0.804213269037301,-0.0280504878019629  
"Calcr",81.0953016457194,-0.299863670205795,0.505083737956188,-0.59369  
1001454902,0.552718802744408,0.682514811701318,-0.114539240974968  
"Fbxl17",1003.84667861663,-0.0940128260314656,0.260263707585054,-0.361  
221420012017,0.717933930786349,0.813096873981891,-0.0194517256825972  
"Rsph9",661.376462500433,1.14767601317349,0.313611655643758,3.65954514  
929499,0.000252663325517012,0.00202483745208824,7.11819174591698  
"Mrps18a",1750.78896045095,0.198713888845097,0.315062586588309,0.63071  
2427638243,0.528228571710252,0.660683859850311,0.0823628986898109  
"Crip3",56.3799543912734,1.17681806919411,0.400489882686873,2.93844643  
789469,0.00329861649928091,0.0145249377829673,4.98016257082292  
"Rrp36",1031.66967392484,-0.0277274814091281,0.156762423654853,-0.1768  
75814769082,0.859605936097363,0.911029575198301,-0.00258364443591243  
"Ptk7",1620.34982618745,-0.559560916077411,0.300052614706207,-1.864875  
98725076,0.0621987890070295,0.13717577132645,-1.11156338016907  
"Cnpy3",2414.16758498716,-0.015167269984046,0.101564171452082,-0.14933  
6815997184,0.881287866009993,0.925956848531672,-0.00116678236519217  
"Ubr2",3417.87531794932,0.18951789328153,0.182040461693598,1.041075657  
12791,0.297840436323743,0.442157212383154,0.154663615079955  
"Guca1b",132.80390474502,-0.305600260065025,0.168633374541708,-1.81221  
695228213,0.0699526806854799,0.150015108667563,-0.579729580887553  
"Taf8",1377.84224489764,0.0210938374574804,0.115181525881558,0.1831355  
96581445,0.854691626030549,0.907618501682864,0.00204464973284769  
"Guca1a",79.4254793993585,-1.05116143152195,0.406396493974317,-2.58654  
158465348,0.00969444716724911,0.0330010304533149,-3.58573921111457  
"Gm20517",31.5723202103923,0.0352918219899147,0.543361020895855,0.0649  
509637841303,0.948213042993192,0.967971618444045,0.00114883745616768  
"Pgc",0.37482137212789,-0.443418814973781,3.89783568332835,-0.11376026  
3643322,0.909427839056949,NA,NA  
"Bysl",819.143679883608,-0.252561881815716,0.212068471920902,-1.190944  
97889303,0.233675185409202,0.371267826361524,-0.250246286609654  
"Tfeb",1644.45609057872,0.70416051143322,0.208002503790867,3.385346323  
24045,0.00071088502296967,0.00452229565346252,3.80157636917608  
"Foxp4",2219.06023463064,-0.264648965726457,0.195111639508439,-1.35639  
763159804,0.174972686433438,0.30122953181074,-0.317547726314597  
"Trem2",702.256997221227,-1.00265752196787,0.385752571354078,-2.599224  
46776782,0.00934346536115333,0.0321147375040432,-3.44757797240862  
"Trem1",12.2931526562587,-0.301796756584673,0.50988997788585,-0.59188  
6033602797,0.553926906791149,0.683530588482616,-0.114828798231276  
"Nfya",2224.26274239661,-0.233420869910791,0.154078102774994,-1.514951  
61029899,0.129784658942178,0.239838999152175,-0.333275381068033

"Tspo2",5.80210003113187,-0.457766258092179,1.31934750953221,-0.346964  
127938123,0.728618268389885,0.821808237234105,-0.089835803795139  
"Kif6",35.2999404169196,0.802197517786519,0.549949917910589,1.45867376  
584815,0.144654919951757,0.260760463334725,1.07827624670462  
"Brd4",5949.58089335145,0.00666989936290588,0.166836905197557,0.039978  
5608286598,0.96811021860616,0.980477693900995,0.00013149962266573  
"Stk38",5515.36416443161,-0.0442411295219978,0.0983745352740664,-0.449  
721357247018,0.652911369620836,0.763594501103844,-0.01193264615721  
"Ppil1",1364.56420095565,0.262126720802841,0.139188493186073,1.8832499  
3541254,0.0596665046768294,0.133018237844594,0.528780116731172  
"Cpne5",114.779426191048,-0.984320862993098,0.324299104338943,-3.03522  
535160729,0.00240356023310957,0.0114877093334588,-4.39644705501092  
"Pi16",1365.17154526437,-1.88868368621703,0.418619593279143,-4.5116944  
2744554,6.43117942203264e-06,0.000120340821852968,-17.045715252749  
"Mtch1",9459.88349642048,-0.422435710279555,0.229290348798276,-1.84236  
149708684,0.0654222898340439,0.142461894927875,-0.823192323658768  
"Fgd2",1527.87645134615,-0.796655998430518,0.422776528760624,-1.884343  
01394623,0.0595185926723927,0.13276438850547,-1.60859125085939  
"Pim1",2815.54765730668,-1.71703380126963,0.40979609153457,-4.18997115  
087121,2.78989922834554e-05,0.000368796306130721,-13.5736090712476  
"Ccdc167",811.902616197511,0.057367448063616,0.146707856748276,0.39103  
1873378452,0.695773676265957,0.797323799710386,0.0129934062757659  
"Cmtr1",2906.61345124976,-0.211137876382383,0.165925779816558,-1.27248  
38576369,0.203201255931169,0.335366352475532,-0.230674834675621  
"Glo1",4490.73339344629,0.486111430404668,0.232394420289898,2.09175172  
879914,0.0364607304828636,0.0913124367411748,1.16349229031001  
"Glp1r",74.8486710236289,0.0248547927320824,0.538505430039231,0.046155  
1385475754,0.963186598593607,0.978046740493088,0.000551722169821557  
"Tff2",5.14861123068763,0.753918584586009,0.811503132136712,0.92903964  
8437238,0.35286853920135,0.497881957981613,0.525776987233747  
"Tff3",0.405010826162729,0,4.78471990595309,0,1,NA,NA  
"Abcg1",1102.8971114961,-1.11056771171238,0.198390329514921,-5.5978923  
6918857,2.16973379963432e-08,1.4488174529202e-06,-14.9313195505812  
"Tff1",1.17304717444168,-2.37840661156628,2.09069699947292,-1.13761420  
816402,0.25528161114163,NA,NA  
"Rsph1",80.2613098252229,0.252422616968382,0.232506358472732,1.0856589  
84238,0.277629893322652,0.421164526570067,0.218277844290304  
"Tmprss3",5.12531780704664,-1.36297365930587,0.88723143571265,-1.53620  
983707716,0.124486924149411,0.232851692926441,-1.98633448611799  
"Slc37a1",537.993763777035,-0.653215937484037,0.189596400684978,-3.445  
29714237234,0.000570431949812539,0.00381946502659508,-3.63687439048608  
"Wdr4",2047.58864534078,0.461499626076409,0.223417867210943,2.06563437  
310356,0.0388630162598643,0.0958935827682656,1.08199335664471  
"Ndufv3",6060.64914599656,0.929897259611098,0.318391355735494,2.920610  
88613101,0.00349345852084672,0.0152043424641673,3.89271192008841  
"Cbs",5204.85570531429,2.05823322390199,0.688206060091398,2.9907223188  
7734,0.00278318452212716,0.012786647458161,8.97256686679114  
"Cryaa",38.437767345585,2.50311296187239,0.98114353599643,2.5512199490  
0601,0.0107346556572093,0.0358520582398538,8.33124679262774  
"Sik1",5052.4256859187,-0.0710639167266969,0.234375034489108,-0.303206

000082741,0.761732876716665,0.845664505366508,-0.0119126265538225  
"Arhgap28",706.341618563919,-0.7471895083138,0.269032820342163,-2.7773  
1730784186,0.00548096426132763,0.0212884145751726,-2.87637495610361  
"Epb41l3",1056.07876851261,0.429560712161565,0.238682296905558,1.79971  
752296122,0.0719052527804814,0.15310785396023,0.806119078451759  
"Akap8",7565.31814945551,-0.0283356560703592,0.166156678963333,-0.1705  
3576327565,0.864588811242826,0.914852681572238,-0.00252165323398204  
"Myl12a",6699.95927649633,-0.614332015170048,0.205685458575231,-2.9867  
5472454632,0.00281955837187175,0.012902076774174,-2.67256971989623  
"Myom1",747.163399259446,-0.667912621756729,0.227168540825521,-2.94016  
33665012,0.00328039239349742,0.0144551552586898,-2.82974818494469  
"Wiz",2028.65262717506,-0.225080723870077,0.165887844545033,-1.3568246  
9374045,0.174836919286206,0.301084231538661,-0.270179071361565  
"Lpin2",3635.72890117533,0.433518522261295,0.223345538418143,1.9410216  
3549678,0.0522556531546653,0.120250292129076,0.918270237754707  
"Emilin2",149.294045721687,-1.70161855302238,0.39962094238235,-4.25808  
15281555,2.061887573693e-05,0.000294652042427947,-13.8336745809488  
"Smchd1",1601.78814559144,-0.226800754303795,0.113354906460932,-2.0008  
0227124498,0.045413702570038,0.10793256411429,-0.504914873820352  
"Cyp4f13",1908.69578138931,0.583462087884835,0.168096345049144,3.47099  
806194034,0.00051852774198261,0.00355994856097779,3.28956460965234  
"Ndc80",168.386625414542,-0.623807656326192,0.424600738584117,-1.46916  
290915167,0.141788607942913,0.256671124924648,-0.848353262623375  
"Clip4",1085.37196151774,0.627804141975461,0.218915025725328,2.8677983  
1532974,0.00413338930141717,0.0171986715608152,2.5507199714139  
"Lbh",6903.53536877006,-1.54525317885687,0.362067966952623,-4.26785388  
351981,1.97362526760146e-05,0.00028589706885359,-12.6090785173164  
"Galnt14",2124.70677400491,1.56063924452819,0.475989133090919,3.278728  
72725876,0.00104275821845188,0.00607278964855879,7.96540469564859  
"Ehd3",1530.4357444267,-0.0352706098960753,0.33382941226114,-0.1056545  
90640098,0.915856410032486,0.948401052768082,-0.00186855983701822  
"Xdh",5104.42779649682,-0.539821530865381,0.209014542666217,-2.5826984  
2844113,0.00980309710048348,0.0332534424608954,-1.83733493466526  
"Dpy30",1392.59198765322,0.0196456991891382,0.249006903554113,0.078896  
202911374,0.937115183466507,0.960969382940462,0.000782148919495163  
"Spast",1440.17532384522,-0.091625011847065,0.148815005478092,-0.61569  
739928245,0.538094254099303,0.669345827082798,-0.03678326608499  
"Slc30a6",825.070781949545,0.207706429246987,0.104547161039681,1.98672  
472003474,0.0469529108665602,0.110914448276737,0.456745630161538  
"Prkd3",2357.77918184355,0.172939138074177,0.106926227676618,1.6173687  
3947527,0.105798709378461,0.2056283129447,0.273535248561288  
"Yipf4",2758.32571821908,-0.0847152762848148,0.274639491693391,-0.3084  
59922360296,0.757732391720366,0.842854396336032,-0.0144830131551069  
"Birc6",4854.62679262707,0.475759649043675,0.157490729541165,3.0208739  
9321699,0.00252046226143016,0.0119079169307888,2.10787777503715  
"Crim1",4419.10660332149,-0.124932149286992,0.184025160279384,-0.67888  
624086686,0.497209944363633,0.632972022408077,-0.0571351019252312  
"Vit",71.6470979192561,-1.82473584152694,0.456290186047048,-3.99906878  
851608,6.35921968993797e-05,0.000696584637721407,-13.2645910348414  
"Strn",1364.72031785704,-0.311572402534599,0.134680233512488,-2.313423

39115939,0.0206993722593466,0.058971721559066,-0.881967141654779  
"Ttc27",575.556429129567,0.31409435337118,0.204914854478376,1.53280421  
846785,0.125324100943508,0.234013533824605,0.456183203732856  
"Eif2ak2",2076.410308987,-0.0389474772042008,0.210838888120368,-0.1847  
26250225554,0.853443755800904,0.90668808100071,-0.00381516984117277  
"Cebpz",2697.65498759366,0.388711629140353,0.198967526700381,1.9536435  
698158,0.0507433841606677,0.11777103968155,0.831459181764505  
"Ndufaf7",1645.05295700025,0.43524270358446,0.162599628430187,2.676775  
51164475,0.00743344219523994,0.0269700885602509,1.5725435778767  
"Pja2",2595.44849745382,-0.442877249466754,0.142329667490486,-3.111629  
90313567,0.0018605759442271,0.00943989325020554,-2.06505273646997  
"Qpct",173.815557991309,-1.15724768631607,0.338525433513308,-3.4184955  
4494573,0.000629683486376924,0.00412130382311354,-6.35512484988663  
"Man2a1",3993.68263474513,-0.297323927542709,0.183913878430898,-1.6166  
4758570367,0.10595437392876,0.205828273673704,-0.469983821499383  
"Cyp1b1",4208.7604031865,-1.11776922705652,0.36436861521079,-3.0676879  
961516,0.00215721721680206,0.0105947979937346,-5.0829350126881  
"Vapa",4921.20141948683,0.0918045013716612,0.202944775137254,0.4523619  
85222693,0.651008228238935,0.762180763432374,0.0249314888135679  
"Hnrnpl",2161.65443360456,-0.231516420463705,0.0750143801078296,-3.08  
629385633677,0.00202668421565372,0.0100935603670029,-1.06401651114083  
"Ralbp1",7480.59405429619,0.176705773519693,0.154685414616857,1.142355  
75446708,0.253306174702171,0.393699784323868,0.164719225200372  
"Srsf7",7415.76426469503,-0.0936642514614777,0.131070183937221,-0.7146  
11429143488,0.474849180515917,0.612463406873013,-0.0459204056089105  
"Twsg1",4082.54116245302,-0.397105923725154,0.205784961657304,-1.92971  
303892681,0.0536424034699953,0.122640018396612,-0.833327533220098  
"Ndufv2",9355.38549735407,0.645744077654544,0.329648543800297,1.958886  
48622619,0.050126081990717,0.116643793609619,1.38746541215333  
"Washc1",2186.34429953389,0.237643207634322,0.100105299166295,2.373932  
34537514,0.0175997749519779,0.0521045265735901,0.702117677201648  
"Washc2",3347.59039187542,-0.0311078068236627,0.111937056837682,-0.277  
904455436698,0.781085703632663,0.858635003068708,-0.00474118303306208  
"Themis3",5.74539138980163,0.253502065674125,0.610077610468159,0.41552  
4289572918,0.677758137709541,0.78297292368848,0.0620210964073763  
"Lhcr",26.4121077672497,1.02823370575549,0.477589783853203,2.15296419  
755817,0.0313214924018999,0.0812278594437383,2.58137762749129  
"Nrxn1",16.845447150458,-1.25344083070126,1.11160050245814,-1.12760009  
367525,0.259488847127057,0.400753547824425,-1.1461571185157  
"Cacna1h",132.757141853882,-1.53495234520948,0.444524946699512,-3.4530  
1733143691,0.000554353384814904,0.00374394953138933,-8.57672152090946  
"Prss41",6.84617358627412,-0.221471210517983,0.758844376578955,-0.2918  
53267090713,0.770398816011611,0.851399201643393,-0.0356289956842721  
"Tedc2",334.267866776071,-0.331908276415002,0.177189193449299,-1.87318  
57736571,0.0610427361304063,0.135328171582793,-0.663833994540146  
"Lrpprc",3264.71251138097,0.613661224238376,0.226857603144139,2.705050  
28587679,0.00682940503134315,0.0253047234043298,2.25628762318461  
"Atp6v0c",19220.7281981235,0.697094011250299,0.232627428287765,2.99661  
143305929,0.0027299844185836,0.0126105747911734,3.04854515670527  
"Pdprk1",2140.17965272697,-0.268144427554521,0.121680092523423,-2.20368



362641493,0.0275466014535756,0.0737374567740001,-0.699118050661796  
"Prss30",58.0464766668792,-0.978023052853545,0.484561693825326,-2.0183  
6642333948,0.0435531135957945,0.104697153111922,-2.20708834162181  
"Prepl",1372.57228451686,-0.117049841963847,0.132751843440353,-0.88171  
9145515581,0.37792870495626,0.523058907526772,-0.0758554595640386  
"Sbp",0.581795970106808,2.39837846758131,2.90609764665393,0.8252917689  
61306,0.409205963732695,NA,NA  
"Abca3",10093.6625336373,0.979118500356931,0.242846753268993,4.0318368  
9786618,5.53425909914042e-05,0.000624100543175476,7.22511033282545  
"Slc3a1",12563.2733391841,2.13542333429005,0.729526282390297,2.9271369  
4603754,0.0034209820940238,0.0149523220957803,8.97494653109416  
"Eci1",4196.60843170528,-0.125376466941841,0.470675095114606,-0.266375  
825369118,0.789949781407654,0.864674161448741,-0.0182300561205901  
"Six2",2.15897205684043,-1.27383143152478,1.66366735517354,-0.76567676  
0780045,0.443868658046429,0.58512278375967,-0.682689022859857  
"Srbdl",531.762877919521,-0.195783285288801,0.121550372194614,-1.61071  
728332788,0.107241356904378,0.207686926591336,-0.307717189180107  
"Dnase1l2",639.907265185214,-0.285742126690344,0.252566603711013,-1.13  
135356176104,0.257906308802447,0.398878179505839,-0.26262536668574  
"E4f1",1729.54957426572,0.352457757466975,0.252072877107409,1.39823753  
15881,0.162041749723558,0.284080419357564,0.443567352599261  
"Epas1",9826.4618183402,-0.923341075687071,0.262299398759023,-3.520179  
91674984,0.000431254159074476,0.0030733163719423,-5.34152632139997  
"Mlst8",962.179829632179,-0.304800904345487,0.175138807674985,-1.74033  
903959837,0.0817995028262916,0.169160500457647,-0.541602954384595  
"Rhoq",2956.34743949828,-0.605847296294925,0.274495909890213,-2.207126  
86224446,0.0273051975771698,0.0732838152048225,-1.58333071270245  
"Pigf",469.51036204006,0.666734333681422,0.228196549524117,2.921754667  
50849,0.00348065590260331,0.0151587734619074,2.79306734118632  
"Cript",1883.75730488268,0.120453372752161,0.219748120751296,0.5481429  
02612062,0.583593783851881,0.70756286968297,0.0416682896887315  
"Mcfld2",6176.10936159053,0.419270611812732,0.243376369102642,1.7227252  
3153597,0.0849382252715057,0.174161825583397,0.732788756485071  
"Msh2",1015.22929905002,-0.155549645194888,0.11335516339281,-1.3722325  
5244105,0.169991054711871,0.294412485406923,-0.190201981489809  
"Gtf2a1l",0.926180460063555,-2.06580673984413,1.80151261275836,-1.1467  
0678696004,0.251502824517549,NA,NA  
"Meiob",23.2625675324127,-0.901761366337275,0.432661007379502,-2.08422  
148277002,0.037140025516866,0.0926030968705695,-2.14568047757596  
"Hagh",5645.16739000807,1.17075838421876,0.236248765424907,4.955616940  
95238,7.21011415176616e-07,2.10768824184613e-05,12.6059462495512  
"Spsb3",2048.84220031691,0.288171210178307,0.129913872914034,2.2181711  
9076262,0.0265431622552525,0.071790065442131,0.759045612104095  
"Mapk8ip3",5708.1358296753,-0.273057295469495,0.194931324438351,-1.400  
78715545717,0.161277730743308,0.283005555564767,-0.344677152329667  
"C3",14469.08716614,-2.39658901242072,0.498244741665753,-4.81006383410  
759,1.50882102614262e-06,3.8058204874164e-05,-24.3886337178679  
"Jpt2",1733.55006571495,-0.355397387921471,0.282966249778807,-1.255970  
94423552,0.209126504798105,0.342708740170907,-0.380585945563936  
"Tmem204",1051.18561114811,-0.749256697631685,0.147221859087035,-5.089

303329533,3.59381362241065e-07,1.23149697732448e-05,-8.47011842909362  
"If140",935.36062168815,-0.0243112734901951,0.107638355582498,-0.2258  
60692116967,0.821309770991881,0.885430604600226,-0.00295822477221844  
"Telo2",1124.6050887478,0.0799883969290956,0.241899082848715,0.3306684  
58875972,0.740894929430145,0.831231332874675,0.0147856267219901  
"Prss28",0.137590427313787,-1.07702982564828,4.77989601809126,-0.22532  
4948821452,0.821726492309683,NA,NA  
"St6gal2",0.654848874639427,-2.37048139897661,3.12860635538653,-0.7576  
79659793358,0.448642778600939,NA,NA  
"Tpsab1",0.568238103477033,-0.999642690269772,3.04986915844695,-0.3277  
65762508583,0.743088776088877,NA,NA  
"Pot1b",1369.23783093224,0.0338746115399553,0.209226931115271,0.161903  
68686951,0.871381699425165,0.919336326396839,0.00284896504539372  
"Tek4",2.63059645102005,1.00751523834741,1.4198395642034,0.7095979459  
57134,0.477953493744263,0.615408916398709,0.489116737604105  
"Sox8",213.637268603723,-1.33246775421038,0.514348529912193,-2.5905931  
0315877,0.00958107010150007,0.0327165857861731,-4.55687065466552  
"Nme4",256.327443650613,0.654836133044034,0.185648386983876,3.52729233  
839726,0.000419832943686551,0.00301062991393909,3.80172054921599  
"Tmem8",6688.66292836168,1.45158199627003,0.411401604620688,3.52838195  
079084,0.000418108388655945,0.00300047013692073,8.43221991555742  
"Mrpl28",2855.23690685852,0.606999884597203,0.246395345781628,2.463520  
09073729,0.0137580184737638,0.0433296469393389,1.90532297996658  
"Axin1",1672.57993477907,-0.328584369397603,0.107806643319978,-3.04790  
464927417,0.0023044303512725,0.011141032231369,-1.47768346708137  
"Pdia2",15.6924557963857,-0.312397620233236,0.708426207780857,-0.44097  
4115302455,0.659231736347315,0.768252194884268,-0.0823596404401215  
"Rgs11",1577.16759228621,0.402325458806901,0.241293990659858,1.6673662  
6016535,0.0954415985516466,0.19058995171651,0.66690715597604  
"Fam234a",3622.4789503822,0.286347999358293,0.16201419814539,1.7674253  
4071814,0.0771570221730261,0.161625227581614,0.521862079811036  
"Luc7l",4663.78265684312,0.204011301833082,0.161407005965951,1.2639556  
7907454,0.206245935324677,0.339250486306313,0.220539593014429  
"Dusp1",3620.87360614404,0.487916415011603,0.271266770497242,1.7986589  
8840921,0.0720726400814155,0.153397264087702,0.91470872317301  
"Bnip1",1084.61615553069,0.328059919486356,0.113190569513588,2.8982972  
7773368,0.00375194774047738,0.0160042610028064,1.35649505278406  
"Phf1",3718.00748018911,-0.00926571168163462,0.134060449484652,-0.0691  
159228337169,0.944897346748685,0.966007976066987,-0.000320437849091496  
"Cuta",2999.54560884515,0.412887969772047,0.182333297470437,2.26446828  
69238,0.0235453281275624,0.0652668194243974,1.12688336736946  
"Plin3",4166.0302156646,-0.293188748262159,0.162261417249982,-1.806891  
33147697,0.070779224399146,0.151388033933145,-0.553513669861384  
"Kdm4b",1250.64349783319,-0.181039264338571,0.102925454313934,-1.75893  
578070962,0.078588416910155,0.164024507912032,-0.327271815406877  
"Rpl36-  
ps2",0.211547398484995,-0.574942108692901,4.78471990596542,-0.12016212  
4427823,0.904354720653253,NA,NA  
"Rfx2",245.034674550567,-0.55380131703767,0.138964903759678,-3.9851883  
6090729,6.74266174074971e-05,0.000729974562027417,-3.99983049464712

"Uqcc2",2302.76547939162,0.288740594787938,0.162409636685805,1.7778538  
3109089,0.0754278646249391,0.158942235432515,0.531055871907629  
"Acsbg3",4.16909971484732,-4.01775530062096,1.30165823633174,-3.086643  
78135351,0.0020243002086198,0.0100915434173577,-18.4658343474857  
"Ip6k3",42.7963076575906,-0.83583203989297,0.38041146042552,-2.1971789  
1505694,0.0280076708422922,0.074592755919002,-2.16957915741588  
"Grm8",1.49624869954271,1.14244103328155,1.38245776948548,0.8263840375  
44051,0.408586275444101,0.552354932996538,0.67811237761197  
"Mllt1",1232.66893262868,-0.439972995259389,0.15718662982066,-2.799048  
46717161,0.00512534436742287,0.0202459409392243,-1.71580710619256  
"Nudt3",4381.61138942418,0.195693395405131,0.119894745786836,1.6322099  
3648095,0.10263526826026,0.201249995263966,0.313737096947303  
"Spdef",11.6864388292586,-1.12514671915866,0.685382005906448,-1.641634  
45999812,0.100665781662849,0.198348693794854,-1.82018215886955  
"Snrpc",1666.47308564066,-0.540496869867335,0.278288325281437,-1.94221  
89893188,0.0521105952004838,0.120001462763557,-1.14598921615745  
"Taf11",1263.67911296509,-0.112536101673953,0.152360726437788,-0.73861  
6205797,0.460140080779859,0.599618143593097,-0.0575579681866496  
"Anks1",2741.12459793827,-0.0238486490611118,0.179859376031863,-0.1325  
96084715022,0.894512829023656,0.934784603939503,-0.00160833253430359  
"Zfp523",2088.54272706126,0.441565639204341,0.187535087518061,2.354576  
12251796,0.0185438451206204,0.0542162081514254,1.28706465021105  
"Fkbp5",3067.46285345617,0.704303286000426,0.207242977161274,3.3984422  
3262796,0.000677707735913569,0.00435300106064291,3.82921933257281  
"Armc12",17.9077691688597,2.56603115238685,0.863299464159591,2.9723534  
6356301,0.00295526243000982,0.0133910058387729,11.0677337264469  
"Clps",0.463808857968945,2.97459882643398,4.6723496353792,0.6366387489  
30561,0.524360179152226,NA,NA  
"Pdzhp1",0.379725329660286,-1.7679046889696,3.18294029729201,-0.555431  
306856023,0.5785996837859,NA,NA  
"Nudt12",1522.69776114232,0.676406934541332,0.428142617969341,1.579863  
59253254,0.114138108461616,0.218033196706632,1.030240778972  
"Cul2",1592.07440643433,0.0138172187935452,0.176042766784577,0.0784878  
529570788,0.937439992350691,0.961150810898343,0.000547492801930919  
"Bambi",525.117131057487,-0.811975294703848,0.272189447255154,-2.98312  
555057541,0.00285320926242486,0.0130113472465128,-3.52554268219768  
"Lyzl1",0.0756979249635498,-0.0551506907693369,4.78471990596623,-0.011  
5264199061198,0.990803451155754,NA,NA  
"Mtpap",1038.88284539441,0.00170812236975698,0.165012199513391,0.01035  
1491433931,0.991740852303105,0.994546270544975,9.34113250172293e-06  
"Map3k8",476.984537590945,-0.782777076022685,0.275457097690293,-2.8417  
3863220904,0.00448682589874365,0.0182639105164309,-3.1333220839897  
"Svil",2052.25096790466,-0.618989942228491,0.157274022225932,-3.935741  
79300432,8.29401105113867e-05,0.000855191049577482,-4.3726598761686  
"Zeb1",1178.26118934806,-1.09411617748325,0.267276195463778,-4.0935788  
3736985,4.24765558659423e-05,0.000510609054423023,-8.29329812896346  
"Epc1",2116.71695517399,0.205020394776371,0.0939572945475697,2.1820593  
6817999,0.0291051514517345,0.0768337973129077,0.52610502187586  
"Sos1",1600.96614293328,0.0675394550267839,0.131595382119365,0.5132357  
52950067,0.607786419229303,0.728071293686213,0.0214340718682597

"Map4k3",3101.0472070013,-0.00296902293237652,0.108407452930546,-0.0273876274381126,0.978150566422553,0.986106382522817,-4.15397102184256e-05  
"Tmem178",1447.75381013544,1.91784798188937,0.547612842983934,3.50219686492202,0.000461438532568346,0.00324337725595444,10.9914555305427  
"Thumpd2",267.261375372844,-0.144841549483223,0.138283079923722,-1.04742785280107,0.294902291223334,0.439199883461088,-0.119175721660065  
"Pkdcc",2060.32501863766,-0.769085400746235,0.246975240725313,-3.11401822501558,0.00184558089430124,0.00938579454279751,-3.59051976311365  
"Cox7a2l",6439.77140784457,-0.197277991207661,0.282104116300252,-0.699309155055688,0.48435884685094,0.621849528932616,-0.0937183163958487  
"Thada",601.970116914628,0.000129184650974266,0.182146355815887,0.000709235440893723,0.999434112039178,0.999843721980895,2.01902990440805e-08  
"Dync2li1",1111.67201645958,0.482636147550134,0.292244018047565,1.65148341024924,0.098639905508189,0.195237120860691,0.788405671942596  
"Abcg8",3.62518958485635,2.22030411199644,0.939545261192257,2.36316886871308,0.0181194110748443,0.0532628188055653,6.51107905318756  
"Polr2d",801.639572766858,-0.0866614636392435,0.143757994264019,-0.602828831070676,0.546622564821197,0.67654069058522,-0.0338640661739733  
"Slc25a46",2489.67905345077,-0.0321657900321581,0.221594129141847,-0.145156327727293,0.884587446081074,0.927993437194059,-0.00240376937431956  
"Sap130",1551.22439513824,-0.106170536053721,0.171066084851964,-0.620640474385079,0.5348362028869,0.66668177240051,-0.0430460422303887  
"Syt4",11.8891428152821,-0.267993887097285,1.09265379633996,-0.245268801513324,0.806248306861545,0.876804589613832,-0.0352334587134482  
"Adad2",0.616185992272172,3.19615839427203,3.40316310779669,0.939172849796588,0.34764200618187,NA,NA  
"Celf4",257.306957699513,-0.610122592629642,0.336922775381829,-1.81086776320835,0.0701613237503364,0.150352545066183,-1.1560434748055  
"Tpgs2",637.456544177708,0.202442495222315,0.12336304278525,1.64103033332866,0.100791118717865,0.198547709917249,0.327294016279251  
"Slc39a6",865.923463165237,-0.777232305485928,0.181530814528098,-4.28154474768594,1.85600390760864e-05,0.000272297698950739,-6.38000045719636  
"Elp2",2932.27427940387,0.100635790767694,0.107686708385754,0.934523789205232,0.350033770557706,0.495006318604112,0.0707655535368869  
"2700062C07Rik",424.761788868953,0.243439651842174,0.182101840465425,1.33683246264825,0.181277330204763,0.309125886333083,0.285799778878971  
"Zscan30",46.6035016255466,0.169140744795128,0.286779727544131,0.589793240420384,0.555329275041522,0.684727380155028,0.0640594362742868  
"Zfp397",1717.9768231012,0.208384244510983,0.14788276585639,1.40911784618194,0.158800324677414,0.279766626857931,0.265439746227183  
"Mapre2",2455.56850481976,0.219352716101167,0.103597373590801,2.11735788754248,0.0342294854196266,0.08704580959819,0.535510337781299  
"Wac",3189.22120767126,-0.149565979081077,0.133306250607952,-1.12197273870483,0.261874031145785,0.403414700109072,-0.135774532096971  
"Ccny",4246.00245198057,-0.305432626271967,0.261937853673813,-1.1660496944167,0.243594242839223,0.382507896180975,-0.293522581042529

"Thoc1",2659.17052689869,0.384450156199471,0.255151429382279,1.5067529  
0015119,0.131874006437678,0.242619303408365,0.544482038229845  
"Rock1",7737.76475012633,0.412847013724308,0.211001526848439,1.9566067  
596319,0.0503937196748511,0.117126802505692,0.885349656732257  
"Cyp4f14",35.9866798478929,1.94110629451835,0.562543026216081,3.450591  
69531461,0.000559359114590112,0.00376601658020649,10.8347456910762  
"Esco1",1223.36901469118,0.127656064949851,0.117433370240392,1.0870510  
204087,0.277014262240433,0.420557820226112,0.110572275746204  
"Mib1",3709.42057661485,-0.0824464273073003,0.10757084242859,-0.766438  
427420807,0.443415475281241,0.584753579151138,-0.0442378468802755  
"Cyp4f41-  
ps",42.1741765039549,-0.173953902449968,0.314629876292983,-0.552884247  
673867,0.580342674555373,0.704841252552677,-0.0608460613620674  
"Zfp871",4385.03977466625,0.333347865149611,0.127048778284899,2.623778  
59629708,0.0086960293250909,0.0303427308125666,1.16511689228158  
"Adamts10",6029.53586129461,-0.487895284741657,0.284792218585218,-1.71  
316227376369,0.0866826900365151,0.176700375361419,-0.845668787447906  
"Myo1f",1259.53968208778,-1.32734876720826,0.422912458104779,-3.138589  
89436391,0.00169762855043209,0.00885509937836407,-6.27406142815009  
"Kifc5b",164.179336664207,0.0754992532836435,0.209302925808564,0.36071  
7620128721,0.718310551370736,0.813426624683554,0.0155905620897148  
"Dtna",418.911818215754,0.309298545076976,0.203202897673006,1.52211680  
35443,0.127979816309568,0.237448896983915,0.444710329381792  
"Cdh2",472.108151783135,-0.288556194432628,0.138887611291871,-2.077623  
7113491,0.0377440305117972,0.0937754591947663,-0.682969830794517  
"Ccdc178",13.9629292036984,-0.385748076377747,0.681176315320363,-0.566  
296959688515,0.571191926853748,0.697652795512507,-0.138882317856838  
"Tapbp",9715.63221862292,-0.748544052128659,0.205425399609844,-3.64387  
292686463,0.000268566052184111,0.00212434113001452,-4.60675985522114  
"Pfdn6",3481.07554902761,0.448772311588225,0.15124693703119,2.96714975  
124209,0.00300574523195242,0.0135536587725736,1.93021402750432  
"Wdr46",942.001951701864,0.162592112085775,0.163795921043854,0.9926505  
55945433,0.320880278236534,0.466139447552968,0.124101753898858  
"Mep1b",4642.86261610834,2.42652369042312,1.0278723338525,2.3607247811  
8798,0.018239261021639,0.0535103515290921,7.10457056433833  
"Rnf138",1322.81643642376,-0.106908380280386,0.103295955326142,-1.0349  
7160119037,0.300682173930182,0.445290978831133,-0.0864918009708979  
"Vps52",2576.1264015441,0.262982201473306,0.126873601295106,2.07278897  
098233,0.0381919233020122,0.0946689703207009,0.619946088098236  
"Ring1",3021.9516620723,0.130153279707195,0.147422345410549,0.88285991  
7502585,0.377311962378793,0.522549565232802,0.0844740908957373  
"Slc39a7",6022.98831580278,-0.286300693073976,0.119074079418487,-2.404  
39140467985,0.0161994184324754,0.0489927502088422,-0.86350663802012  
"Col11a2",236.251945833646,-1.0963655476087,0.259319219282685,-4.22786  
07449205,2.35923726686215e-05,0.000326939646263527,-8.79913931765222  
"Dsc2",288.71607112222,-0.90790951813415,0.310038830505572,-2.92837357  
389604,0.00340740373626624,0.0148996541937024,-3.8190462810134  
"H2-  
0a",286.178528922252,-1.1010378842654,0.509496716411795,-2.16103038311  
929,0.0306929924982368,0.0800283455109149,-2.78053287333746

"Brd2",11433.5803162663,0.186035113835456,0.207830380817834,0.89512954  
3156242,0.37071784288589,0.515830312736545,0.123151044475941  
"Psm8",3506.20542622914,-1.28474447687167,0.323004490184891,-3.977481  
78713016,6.96489556255324e-05,0.000748929027993717,-9.24613427418577  
"Tap2",4492.26972625603,-0.854358925673871,0.161117798783684,-5.302697  
35636674,1.14104002142364e-07,5.02212152092958e-06,-10.4245955055899  
"Btln2",14.6419144983645,-1.88136632496314,0.671949031664885,-2.799864  
62708591,0.00511240414255506,0.0202194897788058,-7.33941378414814  
"Pfdn1",3448.5145539289,0.968136971632587,0.150541900070501,6.43101336  
690443,1.26756012229805e-10,2.90763379583145e-08,16.8004111216742  
"Psd2",85.5199541257155,-0.142767364935461,0.358059580296017,-0.398725  
164168018,0.690095723913028,0.79243147378423,-0.0332147197171798  
"Tmem173",1196.7063070061,-1.25551978603997,0.322141170727412,-3.89742  
10691696,9.72224944640351e-05,0.00096765911029084,-8.71409916077534  
"Dnajc18",1338.34346621947,0.236967480186241,0.154896436066165,1.52984  
462525024,0.126055192724394,0.234979296662492,0.343190017646373  
"Spata24",309.172805984818,0.885628998430292,0.211997866519339,4.17753  
731662908,2.94682328957286e-05,0.000384843673811732,6.96341152233439  
"Mzb1",201.432606346014,-0.159530099244666,0.668877775277463,-0.238504  
111126266,0.811490127127588,0.879810136779931,-0.0204276933599805  
"Slc23a1",5568.40645845088,2.29087390053864,0.675665608697337,3.390543  
88894438,0.000697540846344611,0.00445073106418574,12.4043649267711  
"Sil1",2091.34114554133,0.43416358551927,0.196879180317158,2.205228530  
61387,0.0274380620894279,0.073546637422214,1.13309556054053  
"Hspa9",22915.8173913711,0.00753948089168286,0.449965742702037,0.01675  
56775464914,0.986631529121906,0.991307222479141,6.58255497609552e-05  
"Etf1",4384.68885138088,-0.470729962450907,0.23157097839875,-2.0327675  
1562685,0.0420760164950469,0.101824273255607,-1.07538578260736  
"Cyp21a1",8.13008196766357,-1.96086185168874,1.07883076980702,-1.81758  
057571856,0.0691282626918538,0.14874714669126,-3.73643680141478  
"Gfra3",42.1030346313893,-1.43688743667641,0.372887624010007,-3.853406  
07774596,0.000116485959282818,0.00112049493542002,-9.76219138205165  
"Nelfe",1437.56935901315,-0.0266694633900171,0.136341045111678,-0.1956  
08471155343,0.844916629349658,0.900720312010354,-0.0027885721357286  
"Cdc23",1859.55390121725,-0.235691018565189,0.117894044792478,-1.99917  
662490978,0.0455892467663261,0.108257110394572,-0.523999168309267  
"C2",2407.35825135269,-0.336432629170724,0.169131828486907,-1.98917396  
081227,0.0466820049839443,0.1103504044597,-0.741529301197603  
"Epb41l4a",675.242059990432,0.0968047120217856,0.171318222917767,0.565  
0578810186,0.57203439555038,0.698230039091105,0.0347728974341632  
"Stard4",2171.89218571755,0.662210526057424,0.195509840826797,3.387095  
62269083,0.000706367632869193,0.0044994302860776,3.57845621622932  
"Tslp",40.9532903356078,-0.599370074340026,0.29410239003492,-2.0379639  
698571,0.0415535362768916,0.100759961488227,-1.37556283748573  
"Bin1",2345.40141847855,-0.401137018857208,0.176473511289888,-2.273072  
12241202,0.0230218340650442,0.0641623385649274,-1.10165818593362  
"Ercc3",1357.5597347494,0.229706651114226,0.146548835701201,1.56744098  
317216,0.117011650782312,0.222212120902214,0.345507023599162  
"Map3k2",2107.12662662488,0.0380654800229781,0.119778245870899,0.31779  
9611659086,0.750636945295427,0.837870343449178,0.00673347553833901

"Iws1",1691.97050032086,-0.181495628569651,0.169283806538286,-1.072138  
1582863,0.283657982008739,0.42765967164233,-0.154167388821625  
"Proc",5562.85217424511,2.27455099719686,0.753214063776294,3.019793584  
03537,0.00252947010824035,0.0119360135940151,10.0721555727825  
"Csnk2b",3434.18919505178,0.537709962670166,0.122419462268135,4.392356  
8418592,1.12128461688859e-05,0.000187181570719981,4.61539660228996  
"Myo7b",1382.18113738107,1.39865414762261,0.57207091076235,2.444896465  
29788,0.014489373007308,0.045132010626144,4.3332592492329  
"Apom",1198.14542903076,2.3722427364603,0.725848569546463,3.2682336729  
5821,NA,NA,NA  
"Bag6",7530.35765070163,0.073610966204736,0.154158537036885,0.47750171  
7515155,0.633004898118843,0.748110649989163,0.0213622251144925  
"Prrc2a",11874.4012917217,0.0478110953270307,0.163402959612366,0.29259  
6262885636,0.769830770606108,0.851060858721885,0.00771057368684232  
"Lims2",2223.49469331159,-0.0328458121285842,0.302073726700652,-0.1087  
34422180098,0.913413138761413,0.946721740355626,-0.001798310242439  
"Aif1",1481.70132267898,-1.02290979037976,0.406826237659267,-2.5143653  
3755842,0.0119246832938234,0.0388289036177301,-3.32301489551183  
"Ltb",839.020974059203,-1.52997449351242,0.4446295408024,-3.4410095441  
5074,0.000579548090002385,0.00385992634386817,-8.50223223942273  
"Wdr33",2626.10840080353,0.127538563673373,0.160199863169346,0.7961215  
51855218,0.425961388574808,0.568862681810383,0.0719465707188352  
"Tnf",147.816412472659,-1.43655965373416,0.501303841299752,-2.86564661  
066537,0.00416158520978241,0.0172790861201741,-5.82993028699451  
"Lta",40.9764903507682,-1.7550364060663,0.643502906102948,-2.727316985  
55147,0.00638516671124083,0.0239834291149632,-6.54697401574474  
"Atp6v1g2",434.607365618455,-0.0223504393077219,0.197545695039934,-0.1  
13140604269831,0.909919084094055,0.944807876326866,-0.0012689166361895  
"Riok3",5766.765635509,-0.0272511659755619,0.131163790353853,-0.207764  
398253846,0.835412932074226,0.89489514062099,-0.00302620734231663  
"Pou5f1",0.400860425948983,-0.0557145947770885,3.07812356895465,-0.018  
1001813374274,0.98555893328955,NA,NA  
"Psors1c2",32.5385791930921,0.333955555519288,0.493826279881854,0.6762  
6120586208,0.498874818701559,0.634416469355902,0.151966358145423  
"Rmc1",1277.21404410854,0.194438584263196,0.219196193056562,0.88705274  
2804806,0.375050505056042,0.520146151759208,0.127093895095623  
"Aqp4",689.88386140965,1.60981904444432,1.23277661777493,1.30584813277  
033,0.191604207895536,0.321478258802785,1.8268634796144  
"Npc1",1351.67554481879,-0.380206323192206,0.160340181915639,-2.371247  
92207263,0.0177281350095718,0.0523652744154873,-1.12142296419749  
"Mrpl27",2149.80527731816,0.607498345297671,0.255551901215089,2.377201  
43113457,0.017444559007857,0.0517786590858877,1.7986672506246  
"Zfp521",283.726438222202,-1.05740599181284,0.238364433293705,-4.43608  
963468948,9.16077158253784e-06,0.000159479218139574,-9.24553179226309  
"Lama3",855.48883137172,0.347643668782404,0.29143678647858,1.192861316  
45552,0.232923691368829,0.370224678756781,0.345434468968859  
"Dhx16",3486.11798419996,0.422994360235331,0.204912085506215,2.0642723  
8876793,0.0389918974086656,0.0961507544801014,0.990584249695132  
"Impact",2626.8050163369,-0.297781372411069,0.189359165649567,-1.57257  
437943168,0.115817404004529,0.220334446607504,-0.450426687201029

"Ttc39c",1099.47099243985,1.54462010398609,0.285206983543763,5.4157864  
0464487,6.10199107225026e-08,3.14752968060147e-06,19.5686262688005  
"Ndfip1",12258.6654693292,0.593499937154845,0.232120952266998,2.556856  
37749827,0.0105622816827581,0.0353976225937466,1.98294894268068  
"Atat1",1311.88790869768,-0.0962569186542427,0.189456337904565,-0.5080  
69139934133,0.611404856414437,0.731046292412381,-0.0301552224865094  
"Spry4",500.22436650197,-1.27715567522562,0.292164280407595,-4.3713614  
5953187,1.23474186406733e-05,0.000200124662224313,-10.8769858040691  
"Gnl1",2919.80045622166,-0.0757278811280189,0.115783118852494,-0.65404  
9414789865,0.513079970043139,0.647049560565366,-0.0329667992425689  
"Cabyr",10.8786645314428,1.32750001008264,0.580489282047029,2.28686394  
587917,0.0222037656293951,0.0624446880487446,3.68178690274411  
"Nr3c1",5290.45336219626,-0.167780783801781,0.126996504229531,-1.32114  
489937879,0.186453054536759,0.315165833289948,-0.193729143028267  
"Mrps18b",1402.51268588091,-0.0502792876093204,0.247958765888716,-0.20  
2772777276549,0.839312636486436,0.897124821651609,-0.00545833314043571  
"Gm8615",11.6950523591241,-0.802511853486652,0.58634649000613,-1.36866  
488870474,0.171104050436712,0.295918642488471,-0.977195185557577  
"Pcdh12",595.170735174073,-0.686371667099411,0.208346422262238,-3.2943  
7702671707,0.000986400947193398,0.00581228336910755,-3.53329156123764  
"Dele1",2246.48208153406,0.329688196325904,0.0780463097877479,4.224263  
73806158,2.39723187423566e-05,0.000330794246877897,2.64212581654239  
"Rpp21",1154.08279144091,0.554406227633377,0.177442360283383,3.1244299  
6558412,0.00178149925094746,0.00915059862881284,2.60234733827165  
"Arap3",2679.35511809144,-0.348897546809217,0.238075967775483,-1.46548  
830639741,0.142787740428623,0.258167225786098,-0.472458825223767  
"Hdac3",3059.55127925822,0.0321715765178755,0.13391588771852,0.2402371  
89671605,0.810146384524389,0.878977384869427,0.00415000821940326  
"Diaph1",4115.48107313367,-0.206234858480711,0.117710314885961,-1.7520  
5425863072,0.0797644785145318,0.1659816224201,-0.370372687470558  
"Trim26",3496.995209778,-0.247769766136999,0.176439559428301,-1.404275  
58842145,0.160236800642591,0.281696613373838,-0.313905618365158  
"H2-  
M5",93.1508119730266,-0.858135944201826,0.34017525675984,-2.5226289306  
7399,0.0116481241456062,0.038173290336522,-2.80234522741921  
"Gabbr1",3444.5113702183,0.129905270620681,0.193729911162917,0.6705483  
41455839,0.502508300838217,0.637386602247173,0.0585065924446451  
"Myot",0.115788110020585,-0.542709664906681,4.78471990596623,-0.113425  
587196851,0.909693154959224,NA,NA  
"Dcp2",1302.78624491234,-0.280247512002003,0.216056370255505,-1.297103  
67563144,0.194595517011925,0.325051409007336,-0.314934286767805  
"Ik",4748.90583205243,-0.136401306913869,0.0973173031469557,-1.4016141  
2722148,0.161030506051067,0.282684145762466,-0.17233283446582  
"Pggt1b",3637.27911590256,0.318585554339102,0.153804951651106,2.071360  
84319176,0.0383250872878612,0.0948904827858688,0.750279132248792  
"Mal2",2951.02440908262,0.0550980687042909,0.275291063330097,0.2001447  
77813669,0.841367354148903,0.898419223263988,0.00590202129147937  
"Ap3s1",2515.73192687814,-0.930745756192812,0.383605761358621,-2.42630  
807445743,0.0152533158409546,0.0467330534674629,-2.85115680854017  
"Lvnr",20.8337332779251,-3.35823719167296,1.00901938543849,-3.32821870



435481,0.000874032217745148,0.00531230678977397,-17.5895367118081  
"Ankhd1",4574.83944011555,0.881740173736338,0.388161103307352,2.271583  
02628319,0.0231117070431792,0.0643668138734334,2.41875181019423  
"Slc4a9",5098.93293463495,1.20979351435118,0.520236945487522,2.3254663  
5690678,0.0200470368470465,0.0575581099166121,3.45391237512994  
"Hbegf",1433.501726928,0.944504631148437,0.412773974178592,2.288188428  
12939,0.0221265503130091,0.0623077861026284,2.62163211493188  
"Yipf5",2545.80460055616,-0.008957438429916,0.13789888126163,-0.064956  
5706985065,0.94820857875002,0.967971618444045,-0.00029158712130374  
"Rbm27",1703.92809829496,0.108324843066007,0.132186106355272,0.8194873  
58034936,0.412508411789903,0.555961084750088,0.063592855081738  
"Lars",2325.15858879204,0.122489108246625,0.134343133744621,0.91176307  
1415841,0.361893454051073,0.50669241469825,0.083274359464763  
"Pou4f3",0.0831863295579107,-0.0587437094118094,4.78471990596623,-0.01  
22773559510892,0.9902043333289,NA,NA  
"Tcerg1",2468.94936729481,-0.136187479091321,0.171442086223711,-0.7943  
64336616932,0.426983359696661,0.569993259438963,-0.076555168913649  
"Ppp2r2b",141.820974770888,0.51899172425321,0.313577240599452,1.655068  
2162426,0.0979106612366191,0.194109005876116,0.85080150159793  
"Dpysl3",3814.80692473434,-1.16653514156329,0.345729926330668,-3.37412  
255266435,0.000740513918897298,0.00466736301593826,-6.26098195363392  
"Jakmip2",136.789959699147,0.276269470526152,0.280362341400728,0.98540  
1495599847,0.324426895312098,0.469263768901727,0.20902279097402  
"Spink1",11956.945094113,2.15544185105436,0.77386994682456,2.785276595  
76242,0.00534820799312772,0.0209396304116475,8.33317900983268  
"Dtwd2",178.607318231755,0.143785976386777,0.150477945247838,0.9555285  
73638887,0.339310462648056,0.483935001149279,0.10436053406658  
"Hsd17b4",8193.0349091281,0.2754412078674,0.355909725565017,0.77390750  
5421856,0.438985490860857,0.581042638028986,0.149545608304497  
"Rab27b",898.127150228527,-1.68599853828413,0.426915522438062,-3.94925  
564817977,7.83945912260206e-05,0.000818275021266033,-11.9846037530301  
"Mbd2",5298.7176873788,0.0530620713273838,0.185568117326014,0.28594390  
077344,0.774921088911536,0.854443956493554,0.00834689543004494  
"Smad4",2092.71669526508,-0.172030425030266,0.0726331292031901,-2.3684  
8428420333,0.0178611391957073,0.0526749891613051,-0.506391257870879  
"Sec11c",1966.9273151765,0.0948546147945302,0.168026132817468,0.564522  
989394596,0.572398259006171,0.698586708444061,0.0340239683263427  
"Grp",0.302304364586444,0.809465924717853,3.89255900728404,0.207952126  
917825,0.835266347324022,NA,NA  
"Rax",5.52066862650852,1.04926793123989,0.776158564652006,1.3518731597  
2005,0.176415895109296,0.302848839834571,1.25337307835102  
"Cplx4",0.505995766060354,-0.392318702570167,3.69058326239829,-0.10630  
2628792399,0.915342245935766,NA,NA  
"Pmaip1",1414.43813033232,-0.572352587003631,0.374113812024977,-1.5298  
8894985096,0.126044219015654,0.234979296662492,-0.828914137413898  
"Gnal",103.4351300189,-0.503705812811668,0.313718091954355,-1.60560014  
143193,0.108361794383705,0.20935773552254,-0.787650238157713  
"Impa2",860.158236531233,-0.687483410207199,0.448160416053951,-1.53401  
18974819,0.125026725868848,0.233637253305616,-0.999590955288963  
"Cidea",4939.27529553803,-3.82032914662277,1.59398711217806,-2.3967126

9449764,0.0165428892472095,0.0497306898769799,-11.465316002304  
"Afg3l2",4572.49861330806,0.27486748120804,0.249147926127058,1.1032300  
5886818,0.269927270866317,0.412302540333054,0.243532005058926  
"Srfbp1",660.087947552754,0.0942989878554268,0.143167853290737,0.65866  
0346495031,0.510113901893859,0.644476178262584,0.0414271879461907  
"Lox",1538.27830518953,-1.79714086984071,0.272126020988481,-6.60407580  
029541,4.00004832781947e-11,1.19989141993575e-08,-32.777063312827  
"Prelid3a",27.5488873382594,-0.662366997322614,0.370495381577383,-1.78  
778746040663,0.0738103047269822,0.156446713943548,-1.22871715082697  
"Spire1",1496.7365744847,-0.286395062633112,0.170501912939778,-1.67971  
759199129,0.0930122753472795,0.186728660033372,-0.480599191379747  
"Sncaip",344.46372928602,-0.565732060976659,0.213375670890072,-2.65134  
28574906,0.00801724106103507,0.0285525565066663,-2.01174818840492  
"Snx24",630.843679102125,0.200474852058771,0.221431535276124,0.9053581  
81294183,0.365275662634951,0.510255399774773,0.134888280257061  
"Psmg2",960.835636951765,0.225784985286065,0.121003227031451,1.8659418  
4985974,0.062049501614096,0.136921817844233,0.448938489178643  
"Ppic",3394.14415132259,0.326293697436007,0.218323245123743,1.49454400  
630161,0.135033488857099,0.247195234203011,0.456020512192091  
"Ptpn2",1259.74307834102,0.051606049694748,0.0872061435058272,0.591770  
804442231,0.554004076040588,0.683582551236513,0.0196313465600697  
"Cep192",837.34780304993,-0.351886307501464,0.197301907182531,-1.78349  
166780189,0.0745063031275731,0.157459776542534,-0.650491834333676  
"Ldlrad4",383.119179009781,0.0990776939078324,0.187862262641473,0.5273  
95404030228,0.597919034455319,0.720088037912898,0.032535311422499  
"Setbp1",902.990112838237,-0.0859489763115348,0.190331770811797,-0.451  
574510891944,0.651575535890804,0.762707558311755,-0.0232819102658102  
"Slc14a2",1610.66697176985,0.376573601074675,0.682617892113349,0.55166  
0900520529,0.581180703009986,0.705595351636905,0.131316246519185  
"Galr1",0.996819834238811,-2.88839358257266,3.28994840387559,-0.877944  
948671567,0.379973594757762,NA,NA  
"Me2",483.10127903984,-0.866617021326797,0.149565080957544,-5.79424699  
78858,6.862839441616e-09,5.96319630519015e-07,-12.4207789434199  
"Mapk4",1088.9771093922,0.62825754806059,0.423707564395946,1.482762171  
01825,0.138137610014907,0.251673249866441,0.866758978087593  
"Cxxc1",2824.21583532886,0.0919615734732702,0.202919209773229,0.453193  
039614344,0.650409744034598,0.761890444336146,0.0250091804968522  
"Mbd1",3284.03576855957,-0.48265774193367,0.0729064957448003,-6.620229  
61058437,3.58641356736852e-11,1.10996653550081e-08,-8.84052855489278  
"Smad2",1686.68920594232,-0.996124674013876,0.200513128641396,-4.96787  
756873205,6.76896746055657e-07,2.01191048088311e-05,-10.7719335484264  
"Sall3",227.330424018944,1.75518592353024,0.564621600923963,3.10860569  
389836,0.00187972398726514,0.00952217674816722,8.16886663266814  
"Atp9b",3158.86080385739,0.0091457243187055,0.121497301362926,0.075275  
1231188765,0.939995814189235,0.96275875322066,0.000347102319649478  
"Rbfa",1834.42021740574,0.358084920972031,0.134702291350749,2.65834320  
545907,0.00785258803741,0.0280832284580741,1.27928800556055  
"Gm16286",3517.71811608628,-0.306577051965792,0.0977850649579503,-3.13  
52134612543,0.00171729102385382,0.00892035531976702,-1.44686571703283  
"Pde6a",256.405391384562,2.66624947695604,0.822952829313389,3.23985699

056478,0.00119589662192178,0.00673771971628047,13.3313373235822  
"Csnk1a1",9697.08516761217,-0.454122872879615,0.15041855341548,-3.0190  
6156234102,0.00253559001918154,0.0119562114133015,-2.01017687319223  
"Il17b",0.338084053487133,-0.990259771449806,4.7518312828918,-0.208395  
398004781,0.834920249314603,NA,NA  
"Pcyox1l",531.514480599446,0.270470826276614,0.193465109288914,1.39803  
413272159,0.162102817580655,0.284157218123494,0.340313861063983  
"Grpel2",2532.05692547619,0.675700142703905,0.178458917883223,3.786306  
39879851,0.000152903121807705,0.00138023382824381,4.44982487997611  
"Napg",1959.4314184575,0.0032467898024206,0.111496296529441,0.02912015  
82786499,0.976768758633074,0.985263880786686,4.82011089726056e-05  
"Txnl1",3888.27437914982,0.331812410606543,0.199699782839946,1.6615561  
9143803,0.096601793385652,0.192178529479996,0.547268328410715  
"Nars",5965.70223031385,0.182958573827519,0.0670296991687286,2.7295150  
6714915,0.00634275505668209,0.0238626232667534,0.683431127073318  
"Fech",5155.33614907587,0.251695466189228,0.238211129190221,1.05660666  
252179,0.290691138555658,0.434354802633015,0.209887228658471  
"Nedd4l",4763.01573134218,0.815105758875601,0.182652958580885,4.462592  
69605339,8.0973880704635e-06,0.000144053715873994,7.20987477690226  
"Lmnb1",922.467395048332,-0.831057506384554,0.259681894780793,-3.20029  
052116275,0.00137289126341284,0.00751084002638148,-4.0650413061714  
"C330018D20Rik",847.444717473444,0.112038541179129,0.262025073468645,0  
.427587099570211,0.668951759763036,0.776058869034312,0.028404783971741  
5  
"Megf10",35.4544000256443,-2.03912299385131,0.483781686533182,-4.21496  
524282229,2.49816659856558e-05,0.000341819314658468,-16.2747061053807  
"Prrc1",2073.53484919772,-0.215975296954832,0.0861521710553419,-2.5069  
0486738976,0.0121793486498021,0.0394015165047024,-0.698453521828643  
"Slc12a2",2898.19960992144,-0.0372481692104729,0.177563183051272,-0.20  
9774169230326,0.833843934460277,0.89375155694601,-0.00418399160153224  
"Fbn2",623.823002031808,-1.9249757757815,0.5363757745279,-3.5888566695  
1645,0.000332131370929827,0.00250699377208762,-11.5280464963616  
"Slc27a6",11.5374091175083,-1.26880735763774,0.629236583592263,-2.0164  
2337830109,0.0437557229306965,0.105080562347915,-2.85865845586238  
"Isoc1",3806.58032560737,-0.26219519562908,0.25648537406105,-1.0222617  
8232943,0.306657016337847,0.451124076094412,-0.208710748606247  
"Dctn4",2709.04783795636,-0.196911352929392,0.104822086081639,-1.87852  
923262785,0.0603088018946571,0.134066927299284,-0.395676851958466  
"Rbm22",1683.9791602879,-0.168675331393205,0.108095888713467,-1.560423  
18908462,0.118659908440879,0.224580750803753,-0.251919971614165  
"Rps14",34991.212704646,-0.348193292945626,0.247471143020997,-1.407005  
63586957,0.159425717592495,0.280624956361692,-0.442461813582959  
"Cd74",55010.4924388605,-1.41988048114351,0.445087349098296,-3.1901164  
6594776,0.00142215468432056,0.00772455574713343,-6.90537711001926  
"Tcof1",1790.85364550833,-0.0685324324412044,0.22735692864624,-0.30143  
1026752823,0.763085837932842,0.846396995439143,-0.0114289322405901  
"Tmx3",2735.85105806077,-0.257297277821275,0.100721265347257,-2.554547  
71079564,0.0106325856941658,0.0355843041305947,-0.858305287232086  
"Camk2a",135.245644260647,-1.04132791690909,0.337629030823038,-3.08423  
690454179,0.00204075019922711,0.010140302595446,-4.78098371891414

"Cdx1",0.71568303416572,-3.1772638867989,2.39815437071787,-1.32487880079539,0.185211353120856,NA,NA  
"Pdgfrb",5347.72225973286,-1.00679746917061,0.259492776604096,-3.87986703270228,0.000104513583135141,0.00102556912127276,-6.92929121330751  
"Csflr",5143.31850446994,-0.334769618193315,0.348503084699003,-0.960592984370428,0.33675685755907,0.481243418989061,-0.244844495758754  
"Hmgxb3",1405.68578610984,0.222292762596841,0.137929624837179,1.61163899966559,0.107040518883179,0.207421589861282,0.349666935901036  
"Gnaq",6092.47808250054,-0.00539403504745805,0.121606482541063,-0.0443564761906228,0.964620254446543,0.978674457342007,-0.000116274992406211  
"Psat1",1245.75524033824,-0.260117687103369,0.28264953923818,-0.920283428745222,0.357424666442478,0.502564804665424,-0.178968949880604  
"Tle4",807.372647435036,-0.159229685751688,0.197215523592793,-0.807389209788893,0.419442281566041,0.562390703202769,-0.0916459941825351  
"Cndp2",47687.701694794,1.82373553236559,0.49708625967056,3.66885122428099,0.000243642805347417,0.00196791525213916,11.3632958728603  
"Timm21",1154.57530853374,0.183109411499096,0.185397462300508,0.98765867249195,0.323319841007735,0.46818345785138,0.138960827079456  
"Cyb5a",26197.097555522,1.24502453945853,0.34529340508049,3.60570031497796,0.000311312241328925,0.0023775817005215,7.52202915245468  
"Cbln2",0.301006728816405,0.39711544115484,4.78471990595943,0.0829965910147065,0.933854250239434,NA,NA  
"Slc22a6",19141.0479622221,2.34729965609575,1.03001887451781,2.27888994480282,0.0226736082995397,0.0634093537900781,6.47419020985893  
"Scgb1a1",14.5918192472001,-1.27230521204912,1.3135707878812,-0.968585190678124,0.33275219523409,0.477498416487162,-0.940480932780565  
"Asrgl1",596.129533574425,-0.351770671992149,0.215039657547682,-1.63584092350105,0.101872884685105,0.200112583678237,-0.565955093518972  
"Anxa1",3847.34520218185,-0.779714470514514,0.231404946792483,-3.3694805634978,0.000753100022750205,0.00472304414396381,-4.17560626183298  
"Incenp",818.739419298073,-0.0163588887405501,0.412298776535796,-0.0396772672429452,0.968350425514357,0.980571103436974,-0.000320963334738119  
"Fth1",120497.179864328,1.00895550898347,0.276712878075935,3.64621811604517,0.00026612810982564,0.00211191122726102,6.21532933222051  
"Rab3il1",1650.22491993224,0.0133609986477565,0.233347435739809,0.0572579621687143,0.9543397067138,0.971783768618428,0.000382417962693522  
"Fads3",6876.36888846598,0.941699634783369,0.212269169790095,4.43634671824732,9.14984335326446e-06,0.000159431318768499,8.23412492394678  
"Fads2",5158.18923996974,0.37944666971855,0.294337269372746,1.28915604376971,0.197343843027396,0.328423544840233,0.42249535290556  
"Tmem138",487.274335299878,0.0417998352327393,0.11573765244443,0.361160213205541,0.717979682884161,0.813101461164858,0.0086483599410985  
"Tmem216",481.497609569244,-0.258580736528449,0.24100699158109,-1.07291798811341,0.283307914456317,0.427288976954136,-0.219869838489928  
"Sdhaf2",1922.22970834103,-0.152084808833406,0.151705058041127,-1.0025032177383,0.316100613254325,0.461371633463077,-0.117645418982777  
"Cd5",158.202864972322,-2.04400860255478,0.593396074289232,-3.44459407656697,0.000571917572851344,0.00382284841805125,-11.3785042553629  
"Cd6",224.666240819044,-1.75268292758182,0.604155998689112,-2.90104365

658002,0.00371922058728231,0.0159029304848312,-7.25830146804442  
"Ms4a7",1142.86147821648,-1.25054019795885,0.474033202069403,-2.638085  
67100277,0.00833755156034461,0.0293810916905113,-4.41116043556347  
"Ms4a1",103.530295624935,-1.79711882625983,0.773607464984198,-2.323037  
0796597,0.0201771605771376,0.0578720619201279,-5.1209269971478  
"Ms4a4c",282.33393852639,-1.57960076028382,0.59237707634993,-2.6665460  
6220906,0.00766351039067225,0.0275586731090608,-5.67303816297861  
"Ms4a6b",787.739842484068,-1.31139842937644,0.430384988196696,-3.04703  
57130047,0.00231110249655924,0.0111679870123161,-5.89434762959556  
"Ms4a4d",199.159774707028,-1.91420969402497,0.352239765163624,-5.43439  
40785214,5.49829460422239e-08,2.9371437861131e-06,-24.3833427243725  
"Ms4a6d",323.790773138258,-1.33654491846944,0.474024006706861,-2.81957  
221482238,0.004808770935256,0.0192726445417516,-5.27810752960369  
"Ms4a2",40.066856686677,-0.0599565107327263,0.550632164300933,-0.10888  
6684469015,0.913292368098798,0.946646887097463,-0.0032873633587483  
"Ms4a3",0.138584434245715,-0.110890727031842,4.78471990596623,-0.02317  
60122245752,0.981509872939268,NA,NA  
"Mrpl16",2000.43329275058,0.735594002383008,0.30614884059983,2.4027332  
6184014,0.016273052422012,0.0491519109477181,2.21622670549968  
"Osbp",3752.26892507659,0.0876845117074723,0.0854712169145907,1.025895  
20627855,0.304940982477009,0.449651310318136,0.0700847275180818  
"Fam111a",825.896969839362,-1.24883475975122,0.262896819565013,-4.7502  
8477642878,2.03130385148944e-06,4.81871058438007e-05,-12.4139408814784  
"Keg1",37412.1814698515,2.32160705917083,0.785886788838268,2.954124044  
5112,0.00313557943146173,0.013967906729413,9.91556739946356  
"Zfp91",8601.53246779548,0.0959537038379377,0.11509512612332,0.8336904  
18264337,0.404455458918836,0.54829121448929,0.0576632554893972  
"Lpxn",360.729231529286,-0.759354420315021,0.337870868120439,-2.247469  
34987108,0.0246100472654088,0.0675840424761889,-2.04599193102646  
"Gna14",645.659299222374,0.425899738903882,0.504966163200253,0.8434223  
31913721,0.398992286604774,0.543264776830997,0.259866328557895  
"Rfk",3832.5855272697,0.386105621625061,0.176313047531699,2.1898868349  
8108,0.0285324449885603,0.0757730335585603,0.996157448814639  
"Pcsk5",1519.47891069547,0.861059755155527,0.133769544436745,6.4368893  
4414136,1.2194676793843e-10,2.83061676340895e-08,14.965378803703  
"Ostf1",4561.27668713919,-0.0311050468974918,0.149973441924351,-0.2074  
03700937808,0.835694592510933,0.895098503888056,-0.00344710815859244  
"Carnmt1",1402.61909757601,-0.295863291867869,0.266469200048863,-1.110  
30952850692,0.266865668512047,0.408875279321695,-0.264603888303699  
"Trpm6",997.164146240536,0.460200279895305,0.494036636379581,0.9315104  
30618594,0.351589591589315,0.496616477601309,0.322111307142351  
"Ms4a20",1.16929112124443,1.87160326487979,1.40360079774885,1.33342989  
536736,0.182390767197896,NA,NA  
"Ms4a8a",17.3394593238205,-2.0425140903602,0.576537934092469,-3.542722  
81072941,0.000396018721434552,0.00287367809100517,-11.9531243753434  
"Ms4a10",0.548246749768225,-0.550585764698889,3.66699172664504,-0.1501  
46443118001,0.880649078962485,NA,NA  
"Ccdc86",552.06864169485,-0.127155376873895,0.135824797298308,-0.93617  
2034879814,0.349184619114573,0.494150217992158,-0.0896338244242201  
"Zp1",1.44313813880636,-3.12247700832463,2.11947390460515,-1.473232107

99632,0.140688460145438,0.255223631923683,-4.26410184632262  
"Prpf19",4142.21894866564,-0.0788566251889528,0.117366119269216,-0.671  
88576805603,0.501656421378164,0.636844645096129,-0.035582438584126  
"Tmem132a",2438.12369684201,-0.538406155854007,0.173424897502286,-3.10  
454936752613,0.00190569122378469,0.00961624417219306,-2.50052052221078  
"Slc15a3",795.829354306067,-1.63928042891814,0.407963691448066,-4.0182  
0177452439,5.86439704850715e-05,0.000655266553878467,-12.0166934691908  
"Pga5",20.8879318618647,0.69169269916161,0.707510126820386,0.977643531  
789627,0.328250659157079,0.472900203357819,0.517988533666985  
"Ddb1",10907.5377378447,-0.310944090924327,0.151043820512927,-2.058634  
97009276,0.0395292201232198,0.0970336600864708,-0.725338456733309  
"Fen1",463.068430258555,-0.144123291272768,0.272347045801387,-0.529189  
84617102,0.596673759702795,0.719227062271019,-0.047499890337809  
"Syt7",470.84471389461,0.0826510416660982,0.256274111457502,0.32251030  
4283326,0.74706613276249,0.83551080971682,0.014853383422089  
"Aldh1a7",1634.90463334404,-2.39874524901683,0.755474037137499,-3.1751  
5246202994,0.00149757793652279,0.00803295037312831,-11.5720349852847  
"Tmc1",7.34596109294006,0.587898407665574,0.844172269031816,0.69641994  
7956638,0.486165874128693,0.62312068144054,0.278084805735612  
"Zfand5",5281.84681699584,-0.379906061155319,0.120172619905617,-3.1613  
362632328,0.00157047084571876,0.00833679296210848,-1.81863944347114  
"Cemip2",1361.75246931968,0.192309668179882,0.204504215622825,0.940370  
190385545,0.347027707301263,0.491776018385059,0.136488308749383  
"Slc22a19",2653.75233470052,2.33892266353106,1.04775847206361,2.232310  
90551284,0.0255944216075707,0.0697470345918118,6.22827125701407  
"Rtn3",13188.4736297595,0.303100147962019,0.205673514399517,1.47369557  
4498,0.140563574944608,0.255068272151695,0.414102707378978  
"Atl3",4755.11674465634,-0.715535259330907,0.262422558128306,-2.726653  
0150242,0.00639802801290248,0.0240131664467608,-2.66834045687378  
"Gm16437",0.745595946683453,1.03664705833185,2.7157935788648,0.3817105  
4913723,0.702676074460471,NA,NA  
"Naa40",2148.22776679198,0.211455810953761,0.13222934293544,1.59915950  
771231,0.109785165017551,0.211562675184049,0.328440352496946  
"Lipo3",1710.880262891,0.607368229334161,0.241966784173062,2.510130600  
81731,0.0120686517367483,0.0391212920304435,1.96853412687375  
"Otub1",3987.41623842608,0.478141987688732,0.100421354412568,4.7613576  
8617845,1.92294879317545e-06,4.61176575268572e-05,4.77392005470067  
"Cdc42bpg",3792.82064004301,0.235765486757422,0.19169598249681,1.22989  
268573401,0.218737293566569,0.354230876242605,0.244678927674601  
"Lipn",0.589958286556142,0.0263515544155277,4.78471990594527,0.0055074  
3929290081,0.995605721433107,NA,NA  
"Lipk",5.71400726952306,-3.12930659918581,1.17436055741947,-2.66468980  
026213,0.00770593675990767,0.0276805829021989,-11.2248981558028  
"Ehd1",5424.4881650036,0.385486344551312,0.210258656439767,1.833391076  
86985,0.0667444336451075,0.144678484403814,0.745238140167406  
"Atg2a",2206.35144462649,0.136428097560535,0.163710205279868,0.8333512  
09396551,0.404646683053345,0.548512307158934,0.0819312884773125  
"Ankrd22",41.2258971451908,-2.64641824673956,1.04731090252913,-2.52686  
975791887,0.0115084172419134,0.0378272284866535,-8.66629491823351  
"Stambpl1",273.09024194437,-0.834617535976683,0.164090993702938,-5.086

30923088707,3.65098597611133e-07,1.24452665318564e-05,-9.4263125078922  
1  
"Ppp2r5b",2125.92803071129,-0.492147854145774,0.23050176117697,-2.1351  
1537453253,0.0327515870922154,0.0841025214176236,-1.21841966106208  
"Fas",687.771738739634,-0.477279284383026,0.164974191853994,-2.8930542  
3484316,0.00381515412874927,0.0162029786979641,-1.96761257415966  
"Cdc37l1",3769.37019472556,0.508606890223103,0.130600958765549,3.89435  
801260954,9.8459143219954e-05,0.000977970644168448,3.52466146752214  
"Lipa",6380.10577281781,0.800999976330587,0.182487535119151,4.38934076  
131606,1.13694795135369e-05,0.000188826330114942,6.86832076279351  
"Ak3",9536.8427481102,0.606428699927373,0.254396969132062,2.3837890128  
8153,0.0171354234322078,0.0510982930548488,1.80352149230383  
"Gpha2",2.50889225468344,-1.69267562384531,1.40656044636849,-1.2034147  
7553668,0.228815852937525,0.365393243290407,-1.70415387133671  
"Rcl1",530.778142908229,-0.0231687649445051,0.26554583051142,-0.087249  
5903998338,0.930473122175427,0.956679177759194,-0.00102607929093058  
"Majin",15.1295372189431,-0.495449922604259,0.570931997511545,-0.86779  
1479131875,0.385508495530743,0.529967576600244,-0.314580701625097  
"Snx15",1207.9414286994,-0.0433057962188099,0.0950252071759807,-0.4557  
29563826262,0.648584459981155,0.760438953740984,-0.0118597011757107  
"Jak2",2147.56681356902,-0.343441779339622,0.132578401110603,-2.590480  
62476713,0.00958420165484397,0.0327176979288041,-1.17451563463359  
"Sac3d1",478.59120349957,0.352485869505404,0.148468245315641,2.3741498  
9822252,0.0175894080852386,0.0520817431808629,1.04157488090045  
"Cdca5",88.1756847296495,-0.787951164163158,0.422238959845666,-1.86612  
614916247,0.0620237182807592,0.136880414152602,-1.56695721023691  
"Zfpl1",1209.84243688484,-0.0159814857691319,0.0688336408234778,-0.232  
175511536809,0.816401697073932,0.882692059184005,-0.00199415194374262  
"Tnfrsf25",471.005113541442,-0.130618467170302,0.23361070906358,-0.559  
12876466101,0.576073844900809,0.701661107332962,-0.0462787426516091  
"Kif20b",719.817065247845,1.89270017980597,0.489412032951422,3.8672939  
2081342,0.000110049758368645,0.00106876228693663,12.9484427539353  
"Vps51",2181.59444336065,0.318594583086838,0.155988206153456,2.0424273  
7924311,0.0411091561816885,0.100008095118064,0.733565348160595  
"Htr7",24.3771315670812,-2.14045370055208,0.492967502662178,-4.3419772  
8854937,1.41206132735151e-05,0.000222561435715121,-18.0018735519412  
"Tm7sf2",894.797647205935,-0.0853230001154738,0.228544022378429,-0.373  
332888900476,0.708900701225223,0.806991234965518,-0.018296875065631  
"Rpp30",793.251846339346,0.202834201380816,0.194599339851662,1.0423170  
0649874,0.297264730217544,0.441546881315835,0.165811093284346  
"Ankrd1",1514.47146419905,-0.607500933753747,0.6273252608093,-0.968398  
646931612,0.332845314967973,0.477543631438229,-0.449003787348493  
"Pcgf5",1280.27761315095,0.309209032707311,0.13030044451945,2.37304664  
498789,0.0176420358109122,0.0522058604099507,0.912958383019055  
"Mlana",1.70349814178322,-2.30240361137926,1.60774192090398,-1.4320728  
8523315,0.152122963464298,0.271024629169123,-3.00589285749645  
"Syvn1",3324.53865976115,0.0818991753521809,0.144232921951108,0.567825  
807341983,0.57015325424634,0.697024775929221,0.02956022335484  
"Il33",1387.26244447646,-1.61582372045751,0.278811900149545,-5.7953900  
8051966,6.81625605418342e-09,5.96319630519015e-07,-23.1587757330338

"Tnks2",6015.18202168987,-0.165549773148572,0.128351843028361,-1.28981  
220092017,0.19711587068251,0.328212232840955,-0.184438146124351  
"Tjp2",2404.44616359902,-0.358637764237678,0.142133118434786,-2.523252  
62533538,0.0116274836578163,0.0381157828446709,-1.17171506349022  
"Trpd52l3",0.12787631826076,-0.0652521028551441,4.7847199059608,-0.013  
6376013931041,0.989119105682124,NA,NA  
"Frmd8",1984.85455750907,-0.134710851075185,0.120023548556607,-1.12237  
017398008,0.261705080547963,0.403277737435626,-0.122334935500557  
"Uhrf2",2559.55365368075,0.0510424352228493,0.132123870870313,0.386322  
584152491,0.699257776603206,0.799608710821026,0.0114147618114994  
"Slc25a45",2156.36250574013,0.418597874934477,0.214640886283352,1.9502  
2431272426,0.0511493891881387,0.118417334408731,0.893095377803999  
"Rad9a",765.146947617301,-0.435530589884616,0.186001124472342,-2.34154  
815526063,0.0192039484052693,0.0557034492719339,-1.25768743693212  
"Dpf2",2744.15198612765,-0.104768080332259,0.0841454027158417,-1.24508  
383049826,0.213100937106871,0.34749870968552,-0.110739266574385  
"Gldc",1848.09783138014,1.13734636942958,0.501775132626711,2.266645545  
93561,0.0234118873956562,0.0650097580447032,3.10861545154578  
"Mrpl21",1251.755885598,0.396614337729649,0.180592075510132,2.19618904  
43382,0.028078415208068,0.0747505379201133,1.0286584983524  
"Rps6kb2",1891.27652693864,0.47979425654568,0.217965469081018,2.201239  
75861213,0.0277190550304142,0.0740364568469885,1.24899927968415  
"Ighmbp2",472.999926843531,-0.184047786770047,0.158311808885474,-1.162  
56511795144,0.245005990240031,0.384198713020759,-0.176059262232116  
"Pola2",789.126505555791,-0.621645558798332,0.21236740414602,-2.927217  
3914736,0.00342009729548309,0.0149518065173384,-2.61272850964944  
"Coro1b",7011.85634892797,-0.310332872964372,0.134115873250892,-2.3139  
1605961383,0.0206723270108401,0.0589196070833738,-0.878732777257214  
"Dmrt1",0.109801196260762,1.56396771900948,4.78466789306688,0.32687069  
4886831,0.743765686733259,NA,NA  
"Eif1ad",1522.91657288289,0.134455366602227,0.142308213883191,0.944818  
032166367,0.344751784239417,0.489278244552788,0.0961119154553227  
"Cabp4",98.9688834194337,-1.71639843403554,0.365726399177362,-4.693121  
51897233,2.69067551174758e-06,6.05579488705372e-05,-16.6695068044579  
"Chka",5885.32977485319,0.797592734261117,0.300909603508476,2.65060577  
981404,0.00803475627104691,0.0285805149962289,2.8354661676149  
"Banf1",2889.23177679964,0.0695709167138155,0.164664862612522,0.422500  
074454409,0.672660046379735,0.778687386312288,0.0174028597420796  
"Tmem134",3092.5467483286,-0.207830246679338,0.247321730983102,-0.8403  
23435604362,0.400727064816676,0.544827857875709,-0.126212272683011  
"Cst6",27.9201756459806,-2.22381562861957,0.940276956201664,-2.3650644  
7802665,0.0180269321189194,0.0530389501214262,-6.53074324098861  
"Aip",2742.21553123732,-0.373343974099313,0.182808939768091,-2.0422632  
2067691,0.0411254283196311,0.100010195258576,-0.859618207876893  
"Pitpnm1",2417.13288486579,-0.605611158890587,0.206940386143355,-2.926  
50057428162,0.0034279887297582,0.0149695239088075,-2.54461995494042  
"Sf3b2",8994.24291039025,0.173483359477732,0.0918752054522839,1.888250  
03028517,0.0589923921997959,0.131831938465515,0.351516729658609  
"Polld4",1211.85524908731,-0.387594773277378,0.161433856793866,-2.40095  
095895711,0.0163525278648269,0.0493257407655315,-1.16639252063499



"Pacs1",991.533560675968,-0.728308538318793,0.185332767557351,-3.92973  
432554725,8.50397688382894e-05,0.000872227992008926,-5.13054015427437  
"Cdk2ap2",2410.72490160206,0.0376128105757602,0.158142081994249,0.2378  
41883080356,0.812003732605836,0.880216199385589,0.0047989327653879  
"Cabp2",18.4020469783728,2.15516132344238,0.97101053708436,2.219503538  
97668,0.0264524867234062,0.0716357819245265,5.68135132935308  
"Grk2",4888.33212715686,-0.307419286748615,0.181312523182667,-1.695521  
5301863,0.0899765294793915,0.181950048930634,-0.523849561701442  
"Klc2",1951.28698387712,0.0842468315342332,0.146574389231662,0.5747718  
40946106,0.565445613345867,0.692939272146326,0.0309028257713907  
"Mbl2",8.89456876473492,2.01502608833472,0.808657354044203,2.491816933  
65838,0.0127091523551254,0.0406101364503827,6.45561479837794  
"Acy3",46717.3290430332,2.09827559970676,0.785214384050232,2.672232758  
75767,0.00753483642902249,0.0272494631535133,7.55950252965632  
"Pip5k1b",178.380309225379,0.145441429796256,0.362130530467905,0.40162  
7086256254,0.687958492640306,0.790675784821732,0.034159432341078  
"Dkk1",5.80966381078975,0.0915489986715877,0.751742263620465,0.1217824  
28768444,0.903071330171479,0.940747323571544,0.0055918764202819  
"Gm49405",466.888035046612,0.283734839451816,0.195480131453612,1.45147  
661474305,0.146647189413251,0.263386781427743,0.378539636709371  
"Rab1b",7398.93867059951,0.235232691684721,0.229957957532616,1.0229378  
1962886,0.306337246422404,0.450760277440248,0.187438023153852  
"Doc2g",891.333667482986,0.612262934512458,0.325893804389612,1.8787191  
6024671,0.0602828501909311,0.134035265255713,1.23043563910264  
"Cnih2",48.862316903706,-0.757225986319681,0.332749486559585,-2.275663  
87599545,0.0228661350267495,0.0638104910192588,-2.08376299091253  
"Yif1a",1725.52412276183,0.190070295630878,0.290092701787087,0.6552053  
68697554,0.512335538214925,0.646570765314861,0.0828844532539797  
"Cbwd1",443.251527145471,-0.0127150006539005,0.189461136425499,-0.0671  
113923086827,0.946493024593085,0.967127187585996,-0.000425002255747269  
"Rin1",292.689831455344,-1.00590193407961,0.261683999322383,-3.8439565  
9147805,0.000121066429608336,0.00115598222147837,-6.8027185168376  
"Aldh3b1",712.763399600796,0.243074587571519,0.175528961201839,1.38481  
186185572,0.166110002910053,0.289050677085249,0.301692815087515  
"Asah2",2011.99461548033,0.729599497254215,0.198668988564824,3.6724377  
6960264,0.000240247666921633,0.00194823172382901,4.55330871124904  
"Rce1",1264.67636957633,0.175222263705852,0.163137805363579,1.07407515  
575768,0.282788998558609,0.426700192996112,0.149232182524195  
"Slc29a2",248.571691809392,0.683841948674246,0.286208966156302,2.38931  
0013093,0.0168800518568826,0.0504641599364454,2.04228843983603  
"Pcx",22620.0554485848,-1.16968124687477,0.815857733913185,-1.43368285  
701541,0.151662786465444,0.270427161454341,-1.52965356391685  
"Minpp1",2046.93320332214,0.425453333151488,0.246549761009356,1.725628  
65771889,0.0844142402845298,0.173271803039032,0.745774510535599  
"Apba1",345.287430603607,-1.11851483531981,0.228681770554632,-4.891141  
22479911,1.00252998039983e-06,2.78451988003361e-05,-11.7319343320255  
"Papss2",6764.87344400821,1.74828746352423,0.39843572952065,4.38787822  
976509,1.14461826847936e-05,0.000189494617453548,14.9848339842147  
"Cpt1a",8835.57995076206,1.22356674839865,0.255069568534502,4.79699226  
931944,1.61065815124663e-06,3.98247320908244e-05,12.3959821718355

"Peli3",169.322481796937,-0.362413529355047,0.215242949327817,-1.68374  
169972503,0.0922315986811843,0.185528908602675,-0.61050174208269  
"Mrpl11",2021.1060501327,0.280061729572326,0.226658317966748,1.2356119  
646728,0.216602835149289,0.351884859168541,0.292510826757881  
"Lao1",0.573124667653522,-1.23511863290739,3.65736929734738,-0.3377068  
41308915,0.735584118735739,NA,NA  
"Tesmin",27.1326667796784,0.561840069469683,0.402276218931758,1.396652  
45676626,0.162518107585533,0.284663558116959,0.705922434881425  
"Mus81",980.489461986248,0.120397734918306,0.171169206892828,0.7033843  
12539863,0.48181628018905,0.619319258430094,0.0576866934026283  
"Gal",1.81869402776987,-0.824966797555859,1.72330785797939,-0.47871121  
4444962,0.632144086664816,0.747477804124188,-0.240107137207405  
"Ppp6r3",5327.09034195865,0.263997533926762,0.110124318606316,2.397268  
26252183,0.0165178256097559,0.0496936527910847,0.792488406170553  
"Efemp2",1808.99494794154,-1.43383889926705,0.252651336819317,-5.67516  
846464363,1.38552235521476e-08,1.02718307536036e-06,-19.7707606376907  
"Ctsw",385.015454487755,-1.04897017857327,0.431333031036887,-2.4319263  
8424105,0.0150187594614798,0.0462323605904537,-3.22461329584062  
"Fibp",2474.39165315052,0.161731042200442,0.166793680140932,0.96964730  
3565626,0.33222325608139,0.476989829353233,0.119723039159539  
"Fosl1",25.2244274355175,-1.15072553699666,0.557902388680598,-2.062592  
95594352,0.0391513175705429,0.0963732344388896,-2.69215319523581  
"Lrp5",1588.68053211265,-0.365340965452651,0.190195544267441,-1.920870  
2646521,0.0547480653624663,0.124472688717044,-0.761249627658327  
"Drap1",5523.94725089125,0.198815851853401,0.153653272253223,1.2939252  
7043453,0.195691234751598,0.326369660010834,0.222619002896252  
"Smarca2",10473.5285318185,0.994018358383221,0.253221345926498,3.92549  
196335032,8.65526599659548e-05,0.000883099824184294,6.99000897618166  
"Ovol1",420.077002627003,0.734718460950164,0.301109616787511,2.4400365  
1822468,0.0146857772659179,0.0455204433586897,2.26998156448054  
"Vldlr",2919.37930257078,0.220026547661924,0.208207260981381,1.0567669  
2841947,0.290617971193313,0.434291736856911,0.183510670292748  
"Rnaseh2c",1864.8130373525,0.651027021361103,0.173743635677213,3.74705  
536017793,0.000178922609229509,0.00155196078648198,4.21099649725651  
"Kat5",1674.03002530642,0.15677853052741,0.142237477581257,1.102230812  
81687,0.270361339426852,0.412803868139761,0.13871493065864  
"Rela",3287.63947146499,-0.413484369672649,0.118823198928688,-3.479828  
63111439,0.000501734602676162,0.0034715476518736,-2.34162598261134  
"Slc1a1",5771.3105922078,1.94683372527663,0.682313608990408,2.85328285  
94131,0.00432700877634955,0.0178066730943992,7.84220056719592  
"Kcnk7",3.48139404436967,-0.607387206151424,0.878371927930694,-0.69149  
2051188764,0.489256374270663,0.625870672190617,-0.284628643828716  
"Ehbp1l1",3524.72136704708,-1.20070819030572,0.228689338517802,-5.2503  
8988738102,1.51777611843316e-07,6.30993576912789e-06,-14.3765415080451  
"Fam89b",1243.71408397174,-0.481094481227434,0.170561019807375,-2.8206  
590331763,0.00479251118590977,0.0192193301322231,-1.90120780307323  
"Ltp3",7251.39326008716,-0.880830163013411,0.239234467118972,-3.68186  
98142495,0.000231529637466944,0.00189957556137266,-5.51939173478583  
"Scyl1",3465.14831415411,0.187267664304836,0.111253596432254,1.6832504  
3243766,0.0923266215433174,0.185628401040984,0.315360328630449

"Capn1",3100.32209265592,-0.915598286063642,0.219971974949197,-4.16234  
061759505,3.150020003361e-05,0.00040487205026719,-7.15259838593808  
"Smc5",1544.88047305593,-0.196959085074748,0.169756198239054,-1.160246  
7958041,0.245948339356432,0.385057067670765,-0.187970606688063  
"Arl2",1960.19223038042,0.0390576281314353,0.197899562853472,0.1973608  
61076556,0.843545155536199,0.899849187145465,0.00412167726915637  
"Men1",2048.08285209635,0.236957340065022,0.0851079626786958,2.7841970  
6696065,0.00536604203856747,0.0209799654437514,0.91564754959941  
"Map4k2",4548.31902532034,0.167815046594203,0.179278001560463,0.936060  
448764016,0.349242065292304,0.494195644754289,0.11828003853319  
"Sf1",8580.71173205134,-0.0760480495394508,0.185737298648933,-0.409438  
761587629,0.682217698810618,0.786209627720872,-0.0182919757766057  
"Rps6ka4",1923.25068378091,-0.239886718422357,0.116696421507531,-2.055  
64759675921,0.0398164964362154,0.0975671795291352,-0.558267757697075  
"Prdx5",51074.825189331,1.7834705203159,0.444766985297566,4.0098986194  
3709,6.07448234160496e-05,0.000672573859719555,13.0271796144326  
"Esrra",7199.0279952694,0.784315482214001,0.197686194143351,3.96747727  
180816,7.26374367821154e-05,0.000773006501976605,5.61979540932447  
"Kcnk4",35.3116786297442,-0.219962363955881,0.450658295865062,-0.48809  
123447656,0.62548521956688,0.742509029596044,-0.0654872493952025  
"Gpr137",2770.44293732382,0.383377171020989,0.201338258589693,1.904144  
66533295,0.0568913459972474,0.128391884428234,0.786946087348855  
"Bad",1379.67667433111,0.171007350061309,0.203214364675941,0.841512116  
203047,0.400061100222256,0.544226005172228,0.104039275888433  
"Plcb3",3541.74858853943,-0.400799233262142,0.131258663574069,-3.05350  
688745944,0.0022618352973913,0.0109978216031261,-1.80762781316722  
"Vegfb",2172.30753308579,-0.314502519786012,0.369131559985803,-0.85200  
6584855838,0.394210437309606,0.538596812182937,-0.194610390664269  
"Dnajc4",1075.79989924717,0.0995825652417322,0.257522257720024,0.38669  
4983662335,0.698982030272454,0.799387156211643,0.0222975221871306  
"Fermt3",1598.26073486659,-1.09595565608987,0.364583797479536,-3.00604  
597260355,0.00264668979458629,0.0123299913150192,-4.81751492669563  
"Stip1",4911.58844519244,-0.228345597081745,0.162447323161865,-1.40565  
934013095,0.159825306141621,0.281128749063708,-0.289757440328385  
"Rcor2",139.359713849897,-1.0441476175912,0.374349374618428,-2.7892329  
689491,0.00528330449816707,0.0207610521644609,-4.04573427783601  
"Mark2",6171.3714653827,0.152812919819262,0.186460583142168,0.81954543  
5523757,0.41247529027004,0.555954874165992,0.0897115980728534  
"Spindoc",1114.500604572,0.0711371868677675,0.166220008215216,0.427970  
059871863,0.668672918486537,0.775920047887311,0.0180479165611578  
"Lgals12",1030.55629736508,-3.41609829939795,1.15765212899584,-2.95088  
499717192,0.00316864872230244,0.0140702147090533,-14.5652017439322  
"Plaat5",4.84940577835516,-1.20396193357367,1.01992342780853,-1.180443  
45364296,0.237823887904501,0.375929482477662,-1.17790061211002  
"Smc3",3229.97839354228,0.144521864358725,0.114222921928312,1.26526148  
971595,0.205777606548658,0.338758170591501,0.156440407243758  
"Pdcd4",2756.05280851005,-0.369033096792537,0.154198879711346,-2.39322  
813163982,0.0167008532668964,0.0500830048066946,-1.10491223560432  
"Shoc2",2044.60927099337,0.103625987206573,0.0811783733127321,1.276522  
09545224,0.201771021218589,0.333598861334694,0.113762269026971

"Gpam",5466.55194896406,-0.509371735893618,0.460997159452828,-1.104934  
65187119,0.269187906092744,0.411463295154933,-0.45234016406156  
"Tectb",3.07218353969614,-5.16804226536561,2.05820653530347,-2.5109444  
4445713,0.0120408644744137,0.0390701906344016,-16.7568369365716  
"Acs15",5170.71830862189,-0.169611865441354,0.212303879385843,-0.79891  
0815629046,0.424342127079249,0.567477557873196,-0.0960942937048516  
"Zdhhc6",2745.83735320122,0.499651642167717,0.103747917967312,4.816016  
08935556,1.46452720142482e-06,3.71330967144098e-05,5.09694734674546  
"Vti1a",1411.55525113851,0.120906997990795,0.200250922747398,0.6037774  
82430432,0.54599159210116,0.67592025795482,0.0473568737088854  
"Tcf7l2",1557.04765991997,0.103917104953304,0.170082865955942,0.610979  
268071732,0.541213305459068,0.671719947300579,0.041350047042038  
"Hhex",319.595015238796,-0.721158064636801,0.192134948011248,-3.753393  
4981708,0.000174456671579842,0.00152239950905652,-4.67848955318168  
"Cyp26a1",69.8332025224928,1.33731040071123,0.501827738568185,2.664879  
39572022,0.00770159377093707,0.0276752073987709,4.79722435067905  
"Cep55",82.6378001996261,-1.02312409238835,0.441451946825494,-2.317634  
1156624,0.0204692144575391,0.0584860409573708,-2.90461570844209  
"Rbp4",1808.5278647129,-3.7094109594605,1.03703612177542,-3.5769351535  
3153,0.000347646370943653,0.00259311742182836,-22.0891508810045  
"Eif3a",14787.759368647,-0.109701207530516,0.148165834447448,-0.740394  
760638463,0.459060497024109,0.598713148560272,-0.0562737223648265  
"Fam45a",1289.44189102522,-0.230490967829796,0.133790049740248,-1.7227  
8109080079,0.0849281195189691,0.174161825583397,-0.402845286405327  
"Prdx3",6906.24784124897,0.22377605522129,0.40362547246616,0.554415096  
386295,0.579294796839688,0.703965219429095,0.0785512870178566  
"Plce1",1196.73491086728,-0.733388610198179,0.210948168220356,-3.47662  
943170042,0.000507759079594359,0.00350328610542492,-4.14661870508567  
"Noc3l",752.627010704739,-0.131234128077241,0.0877793651396164,-1.4950  
4530898017,0.134902617714671,0.24702584900457,-0.183499733237452  
"Hells",315.625438972421,-0.205877605772783,0.504549481635629,-0.40804  
2448295413,0.683242511177514,0.786972027583835,-0.0493205692279836  
"Cyp2c55",2.97143668768741,-0.156866982051088,1.32639375659962,-0.1182  
65772339909,0.90585707674535,0.942698616694109,-0.00925650852169993  
"Cyp2c39",0.0721532113593249,-0.544048378937457,4.78471990596623,-0.11  
3705376621746,0.90947135024012,NA,NA  
"Cyp2c40",1.31498271775533,-1.50481443360017,2.10601656392702,-0.71453  
1148223351,0.474898802530089,NA,NA  
"Sorbs1",2055.40489611756,-1.64951843564977,0.572787924888771,-2.87980  
658106591,0.00397919207000174,0.0167206020153349,-6.74836741485425  
"Aldh18a1",546.864925663726,-1.6458021701898,0.244385624668637,-6.7344  
4754543706,1.64553952824806e-11,5.72941602174655e-09,-31.2334612208621  
"Tctn3",480.9672282488,0.395509603338558,0.159492104180074,2.479806792  
76768,0.0131453590105989,0.0417780293380043,1.25589513980551  
"Ccnj",350.006958865264,-0.586587827996302,0.18995287156698,-3.0880703  
3638059,0.00201460782569902,0.0100539604262809,-2.69818003334957  
"Tll2",0.381232259994954,0.91508513379408,3.79200396243164,0.241319667  
083702,0.80930736911824,NA,NA  
"Dntt",3.76172072310076,-0.467437869139342,0.881767313692548,-0.530114  
761435041,0.596032365039322,0.718626344930788,-0.154447896199217

"Tm9sf3",9677.40615388217,-0.348774547675311,0.295970281439556,-1.1784  
1070386838,0.238632912502331,0.376719660591891,-0.340492538199174  
"Pik3ap1",878.034070904703,-1.40059625261388,0.416312427049409,-3.3642  
9124285463,0.000767405149292556,0.00479579025670072,-7.47920748499391  
"Lcor",253.102976128131,0.593711963646241,0.312544224511932,1.89960945  
39049,0.0574843906513334,0.129442676000501,1.21385429314737  
"Slit1",16.3182511640987,0.900059295315954,0.662824639377273,1.3579146  
6074883,0.174490764797026,0.300576104957364,1.08192014257366  
"Smndc1",2057.18009807065,0.192319196297293,0.11849667272491,1.6229923  
7501598,0.104591034868617,0.203982924247763,0.305733479131763  
"Mxi1",2086.48059214152,0.264731907294265,0.152126015562092,1.74021456  
038341,0.081821349872606,0.169160500457647,0.470404060704243  
"Add3",4402.18553333433,-0.235863916800205,0.227515421466186,-1.036694  
19540978,0.299878398061202,0.444303115911651,-0.191344191153816  
"Xnpnep1",3743.64201143225,0.846618028011816,0.184562650439199,4.58715  
794337121,4.49320756533041e-06,9.15449959339731e-05,7.87243008044776  
"Trim8",4530.63072372876,0.195568196986514,0.207465379706849,0.9426546  
11882015,0.345857596273536,0.490617054357323,0.139262428355206  
"Arl3",2597.93180787963,0.64301338325834,0.134758911216368,4.771583396  
2618,1.82783269168808e-06,4.41624310068578e-05,6.44790421959053  
"Sfxn2",2091.22174364886,1.12652231451793,0.234093581331865,4.81227339  
984563,1.49223023190183e-06,3.7737360650612e-05,11.4734720101507  
"Maoa",698.696825966686,-0.570099121638125,0.168634923032941,-3.380670  
57158001,0.000723091787845253,0.00458349924558087,-3.07015054975835  
"Efhc2",25.9687458544529,1.19228115845972,0.40278359051146,2.960103605  
37713,0.0030753559996884,0.0137751645490293,5.1087912029136  
"Fundc1",1275.73732291123,-0.224847798191144,0.186741616183209,-1.2040  
5832822262,0.228567034936496,0.3650557050452,-0.226580322535918  
"Nt5c2",4229.47865990219,0.302817087279829,0.12558321584701,2.41128629  
520629,0.0158963647075276,0.0482258159432664,0.918099256743905  
"Msr1",238.449450546621,-1.39431707765009,0.48514672005484,-2.87401113  
933632,0.0040529466809478,0.0169611030611471,-5.68439733328467  
"Pdcd11",2367.41857766685,0.0730963632990287,0.0999060277364834,0.7316  
51182167215,0.464381500039414,0.603312265976046,0.0369370807830148  
"Taf5",319.542476002729,0.15210706940137,0.191511940591533,0.794243267  
190284,0.427053824513778,0.570048296732364,0.0854893736406494  
"Pcgf6",1116.79114570736,0.403271612733797,0.140465899804978,2.8709573  
8747764,0.00409230686602432,0.0170860383883816,1.64111125413153  
"Nr0b1",1.05790615474879,2.14763942861236,2.95444472235698,0.726918128  
594747,0.467276111020568,NA,NA  
"5430427019Rik",100.931739670044,-0.944262162172691,0.371993153485328,  
-2.53838586362567,0.0111365121910913,0.0368901946116141,-3.11588524560  
81  
"Gk",14767.8825377331,1.71971621889181,0.38250494462047,4.495931995331  
84,6.92658734211702e-06,0.000127051775199543,15.427429530009  
"Slk",4769.48813014599,0.0577403019108193,0.133208784033285,0.43345716  
5230122,0.664682678496872,0.772651756259624,0.0148927736858996  
"Col17a1",138.109668214733,-1.72785039157768,0.451433892123407,-3.8274  
7157828669,0.000129466327891227,0.00121654672830031,-11.5968808323529  
"Sfr1",3331.68829738693,-0.107276859726638,0.0979656892230278,-1.09504

52201935,0.273496825921672,0.416384876381726,-0.0939901124607211  
"Gsto1",3042.60871613105,-1.12914241967298,0.43654757089111,-2.5865277  
8062215,0.00969483549269606,0.0330010304533149,-3.85174924396913  
"Gsto2",85.138003734839,-0.550061014619219,0.406622861438982,-1.352754  
76807337,0.176133987311515,0.302444780678109,-0.657794073495663  
"Habp2",3043.30912877872,1.42240405698851,0.624353975809973,2.27820132  
825009,0.0227145851879375,0.0634875260886475,3.9214425744956  
"Casp7",845.846953222257,-0.515797483374603,0.130795702331334,-3.94353  
540812812,8.02891306016838e-05,0.000834031682723298,-3.65661172161149  
"Dclrela",633.689735163513,0.302333648712061,0.258894969242141,1.16778  
495000145,0.242893520300129,0.38174575679606,0.291147439785008  
"Nhrlrc2",1663.33649476574,-0.0520451316452215,0.0855736081657492,-0.60  
8191389387418,0.543060544817269,0.673574713921573,-0.0205659645410705  
"Tdrd1",4.36739836701111,-1.71369527774396,1.12843865576636,-1.5186428  
3360635,0.128852423240783,0.238681792546911,-2.45508102831801  
"Vwa2",1499.33873241918,0.828704934441583,0.534913820004287,1.54923074  
231834,0.121326261796091,0.228518107853572,1.22328435703896  
"Afap1l2",1604.34513820999,-0.670283006735451,0.257649598815797,-2.601  
52940201029,0.00928091091925834,0.0319602969098727,-2.30795924763194  
"Ablim1",4743.85405640115,-0.283635783089587,0.287616442989961,-0.9861  
59831965822,0.324054686905597,0.468999024272306,-0.214756135332734  
"Trub1",1005.68804986627,0.143387321725469,0.115398134134739,1.2425445  
419945,0.214035717037733,0.348725764749894,0.151054161523782  
"Gfra1",165.800988300231,0.0433967942271074,0.377271628947741,0.115027  
98222105,0.908422942645398,0.943794136715524,0.00251038356149447  
"Pnliprp2",0.386920668513701,2.19145377030188,4.611694478444,0.4751949  
16000004,0.634648050459983,NA,NA  
"Hspa12a",1865.1277527413,-0.500076465262253,0.148977799872945,-3.3567  
1801898499,0.000788735088614036,0.00490550454794146,-2.65910525980642  
"Slc18a2",21.483535847934,-0.101449482726257,0.716235911909139,-0.1416  
42552459903,0.887362353760581,0.930103815375971,-0.00735093513262802  
"3110040N11Rik",671.534279376268,0.218201870721594,0.263372309659054,0  
.828492072701436,0.407391882535463,0.551225184893259,0.129963624105461  
"Btbd1",3947.26070210915,-0.148894677798398,0.204568393590516,-0.72784  
7910349436,0.466706692621094,0.605337893480938,-0.0747404343849038  
"Hdgfl3",883.127304029766,-0.221609429419938,0.168474094163426,-1.3153  
9172547779,0.188378284993655,0.317458928332436,-0.254276172598574  
"Bnc1",3.70635698455588,-1.94087229198589,1.54899403048292,-1.25298887  
780787,0.210209754415738,0.34398815734479,-2.07119807882825  
"Gcgr",1942.40505110583,1.67435803640527,0.461225439390864,3.630237826  
03272,0.000283160193301124,0.00220408347540002,10.2427907097668  
"Bhlhe22",49.3600081942388,0.193846906082187,0.328829051893429,0.58950  
6629557204,0.555521466208977,0.684848099907855,0.0733823391897485  
"Ppp1r27",0.120670194526411,-0.0666950295869129,4.7847199059604,-0.013  
9391711318002,0.98887851071652,NA,NA  
"P4hb",26002.5314572946,0.638214191897145,0.147078026335687,4.33928988  
440804,1.42943863574058e-05,0.000224044972023069,5.36333747447895  
"Arhgdia",10845.597576259,-0.42394018699055,0.163056170154835,-2.59996  
408960167,0.00932335163265179,0.0320668036926168,-1.45832623641451  
"Ints4",1646.85295876252,0.253964129584637,0.186117788861122,1.3645344

2273668,0.17239942796512,0.297691310713319,0.307727878542713  
"Alyref",1313.65543611633,-0.309941100917284,0.224626034224231,-1.3798  
0934395115,0.167645354896964,0.2912544889763,-0.382330281615805  
"Anapc11",2439.81645304658,-0.0370793951563302,0.225482411021679,-0.16  
4444734240336,0.8693810500394,0.918103311111439,-0.00316826209554205  
"Pcyt2",10607.829790839,1.0561793536299,0.285736973498275,3.6963342219  
9132,0.00021873497628634,0.00181716854181128,6.66499418350289  
"Sirt7",4713.98976164672,0.23802303840201,0.124985460875016,1.90440581  
436933,0.0568573525483956,0.128340432969277,0.488677700733858  
"Tollip",2986.0224522899,-0.110099475194554,0.140167837637678,-0.78548  
3153982528,0.432170343524628,0.574244061472209,-0.0610722646391445  
"Pycr1",54.830155571257,-1.76977978239895,0.510063595724286,-3.4697237  
7020139,0.000520993878480183,0.0035743626469411,-9.97088336776624  
"Myadml2",7.86053365955957,-0.683898540394445,0.999269205981726,-0.684  
398694866768,0.493723439932685,0.62984949174349,-0.316148780673449  
"Aspscr1",3713.84434206343,0.611132991990128,0.21917578849273,2.788323  
45576527,0.00529816157662668,0.0208016907922234,2.36674757645093  
"Cenpx",2452.88591914992,0.94259591491624,0.206333063313797,4.56832220  
574709,4.91643854853671e-06,9.83095427268742e-05,8.69769960839084  
"Lrrc45",3053.19952742637,0.266467191153367,0.182072566893003,1.463521  
91162308,0.143324622415144,0.258945838384959,0.360033510009753  
"Mob2",1873.08133401851,-0.187568535211204,0.144652381679335,-1.296684  
73504297,0.194739683742162,0.325255641048885,-0.210666440775235  
"Cbr2",1517.18311281888,-1.76368902436879,0.54842585304065,-3.21591153  
041078,0.00130030911105434,0.00718838305850228,-8.7043150768241  
"Maged1",8524.95361334051,-0.0769453153044983,0.101846108433256,-0.755  
505698628865,0.449945614366601,0.590737296405628,-0.0405027726426311  
"Fasn",90828.5679666302,-3.78770966366649,1.13307848111618,-3.34284846  
706758,0.000829231683272206,0.00509995567340939,-19.9935142086477  
"Arhgap19",666.582412249782,-0.970381547074685,0.291813091491012,-3.32  
53530268863,0.000883066441989687,0.00535719647974951,-5.07443028063577  
"Dus1l",2507.76228283057,1.02298536554697,0.263317331870971,3.88499062  
43477,0.000102333837472083,0.00100773594731116,7.05864925155352  
"Gps1",3938.78348048324,0.199347116269934,0.082568603591498,2.41432103  
243734,0.0157645654672707,0.047901231264627,0.605738952311224  
"Zdhhc16",1566.6371829448,0.210461671144132,0.101996279049816,2.063424  
99064442,0.0390722676248152,0.0962758845126559,0.492593415098109  
"Rfng",2443.40507334106,0.65582679313052,0.162708546827323,4.030684348  
9084,5.56146897047675e-05,0.000626806485470264,4.836639112969  
"Mms19",2455.04431404011,0.2281387941515,0.157554104955627,1.448002857  
2772,0.147616251497715,0.26467501307899,0.303254078747698  
"Slc16a3",199.252309695039,-1.86901219467187,0.251272297894107,-7.4381  
9438249227,1.02070793559008e-13,1.10565351822974e-10,-42.8478789891353  
"Csnk1d",6261.32588704689,-0.286589167562547,0.0786391276920046,-3.644  
35842529934,0.000268059640177521,0.00212205719211584,-1.76406216004921  
"Cd7",79.5076422632101,-1.3493243638931,0.449770959333275,-3.000025537  
20518,0.00269956971788624,0.0125056332523986,-5.91216735159629  
"Sectm1a",170.150897000968,0.166798390718922,0.545957979796392,0.30551  
5070557494,0.759973893666375,0.844657846202704,0.028159513028864  
"Ogfod3",833.853512977975,0.804307857310727,0.294981864643865,2.726634

93493669,0.00639837855522154,0.0240131664467608,2.99938705669172  
"Rab40b",122.258234531826,-0.51877621569085,0.424483802484296,-1.22213  
430207397,0.221656843251233,0.357503939921627,-0.533617830570125  
"Ubt1",736.12907359757,-0.173926212241939,0.142576366189137,-1.219881  
08471788,0.222509957321925,0.358405547117958,-0.178463968086392  
"Ankr2",6.946723983651,-0.123966669617576,0.627278281799385,-0.197626  
274038965,0.843337476508526,0.899676868028847,-0.0131057086653824  
"Wdr45b",1819.99317853559,-0.206842704694743,0.18531304521154,-1.11617  
994544651,0.264345117006485,0.406258460738744,-0.186316817639339  
"Fn3k",905.640719244383,0.947763682433269,0.490420395308598,1.93255356  
32279,0.0532912176170779,0.122057108081497,1.99339936125653  
"Hoga1",4461.11664025816,1.94365586317022,0.505990952382265,3.84128580  
564389,0.000122391508407698,0.00116409250289429,13.1309764478249  
"Pi4k2a",3551.6077936655,0.186833938307862,0.143066997610998,1.3059191  
9469693,0.191580038328567,0.321465368961309,0.212031383001045  
"R3hcc1l",1227.21136486702,0.0801552293513357,0.0995674864984814,0.805  
034175012123,0.420799958923768,0.563823364423834,0.0459300894464743  
"Loxl4",122.891340021798,-0.921512363824932,0.448938874426236,-2.05264  
550770451,0.0401069705619281,0.0981278881721511,-2.13927590405653  
"Hps1",1297.0618413421,0.0120308153130168,0.162137175693752,0.07420146  
0963776,0.940850083376832,0.963431275966676,0.000448197451303374  
"Cnm1",431.488728509716,1.2978590594631,0.507908845023113,2.555299188  
38889,0.0106096559886623,0.0355197583219331,4.33182026955419  
"Got1",3036.34441992449,0.589418839738189,0.261542259104597,2.25362754  
667676,0.0242196088698955,0.0667091303496571,1.59580049358144  
"Entpd7",529.30384351256,0.165969913911126,0.173213575670785,0.9581807  
50373594,0.337971622185825,0.482554971395666,0.12093570955768  
"Cutc",669.316926337355,0.891979438623573,0.199773835559561,4.46494625  
34729,8.0088854120238e-06,0.000143001142640696,7.89638885718756  
"Abcc2",6304.89257808172,1.83757132706548,0.769416674721265,2.38826553  
600645,0.0169281059342643,0.0505418405148178,5.48506544326452  
"Dnmbp",1226.56412611286,0.0174889813540834,0.192380881236038,0.090908  
1050139572,0.927565609992919,0.955515781951002,0.000795818581000009  
"Cpn1",2084.31895627903,0.967246410539844,0.620335561452192,1.55923095  
60257,0.118941726542142,0.224961275013937,1.44296431344965  
"Cyp2c23",512.342999466898,2.05856169321444,0.764450410282141,2.692864  
9203742,0.00708409638057288,0.025997687037156,7.51323081546637  
"Erln1",2848.76051248485,0.995169569071787,0.192029090752873,5.182389  
63258175,2.19060994181123e-07,8.2456588118601e-06,11.6492795278907  
"Chuk",6021.44247033578,0.673560700773564,0.148312051318645,4.54151024  
670568,5.585267077453e-06,0.000108144525795609,6.15098462492507  
"Cwf19l1",542.904037689439,0.117848357759304,0.202410738346553,0.58222  
3842084565,0.560415915876473,0.688661342897804,0.0439581031160715  
"Scd3",11.4059198037068,-1.76646591868174,1.18436510138944,-1.49148764  
735587,0.135833511951793,0.248287411271778,-2.46098429872259  
"Scd2",12288.3927781229,-2.35534029847017,0.506113007098342,-4.6537833  
7532533,3.25899190039688e-06,7.06827853992639e-05,-22.5107138613151  
"Ndufb8",11690.6034041556,0.547150896684176,0.401794901154607,1.361766  
65037777,0.17327153948168,0.298898387756685,0.66076765780763  
"Sema4g",1726.65100568519,1.24841704814364,0.34780002502691,3.58946796



523964,0.000331353545681923,0.0025022197651844,7.47873849869883  
"Mrpl43",2234.08898117139,0.454275570396348,0.200226151990338,2.268812  
36981605,0.0232797384226803,0.0647607846719106,1.24337723660951  
"Twnk",1401.46897666217,0.683295879644365,0.169874770140588,4.02235057  
671525,5.76202083593526e-05,0.00064642049631223,5.01816617213327  
"Sfxn3",2377.33469575346,-0.0642349392432781,0.212406501094994,-0.3024  
15128125248,0.762335623744031,0.845988616491811,-0.0107432534512288  
"Kazald1",194.771222394656,-0.445728872560601,0.226297744818523,-1.969  
65671451144,0.0488777269843545,0.114405914262483,-0.966341311492932  
"Lbx1",0.222265746865732,3.19052280584978,4.69750997731396,0.679194471  
381224,0.497014649864957,NA,NA  
"Btrc",1168.86033104718,0.310156020143002,0.104912954959428,2.95631764  
697643,0.00311336270372199,0.0139038813552843,1.32609912325877  
"Poll",651.752257943941,0.0933582660834896,0.121416725995613,0.7689077  
86945787,0.441948054397999,0.583509700922065,0.050291556647177  
"Fgf8",0.303203908982835,1.52294585941981,4.78471990596136,0.318293628  
331796,0.750262217052019,NA,NA  
"Oga",7678.23948521311,0.282236700129891,0.130189261508754,2.167895392  
13197,0.030166646536543,0.0790088724422334,0.716371815921532  
"Kcnip2",74.663196542855,0.781145183599139,0.328203207295381,2.3800656  
6126002,0.0173095533966717,0.0514719287858587,2.31743801737863  
"Ldb1",6502.62418271214,-0.0737792552201613,0.106873831721119,-0.69033  
9758872722,0.489980550504858,0.626431878077023,-0.0345076824070809  
"Gbf1",2646.72614344037,-0.174096413443991,0.198007303487384,-0.879242  
383375439,0.379269868455356,0.524133807863245,-0.112467722643125  
"Nfkb2",3343.31121478472,-0.740203327481456,0.300390459765418,-2.46413  
727007009,0.0137343500346156,0.0432760757878048,-2.32435341585241  
"Fbxl15",678.218519885811,1.06805428165572,0.247783487084595,4.3104336  
5408398,1.62934708961628e-05,0.000245131246553536,8.87950081471308  
"Mfsd13a",689.60150948268,0.290828620050469,0.144026203724185,2.019275  
74656773,0.0434585672558209,0.104557832930612,0.656695367741087  
"Actr1a",4678.9718924115,-0.391682462297452,0.159062277067819,-2.46244  
72220428,0.0137992480557188,0.0434384466565071,-1.22847693350578  
"Pitx3",1.14023440115707,2.03779320176295,2.99529275761889,0.680331896  
299476,0.496294332594747,NA,NA  
"Sufu",1863.74505958795,0.339307329793793,0.183070530521982,1.85342408  
101587,0.0638215984074754,0.139803788984266,0.667592378602821  
"Hexa",5276.73589123373,-0.813901554449529,0.184863010153965,-4.402728  
01882683,1.06898144078139e-05,0.00018045887560481,-7.01583761929995  
"Arih1",3690.1638735114,0.00363800747712502,0.256176238367237,0.014201  
1901662394,0.988669470467774,0.992458878882467,2.75386220547948e-05  
"Bbs4",634.339098606327,0.440498959411331,0.144775335403833,3.04263815  
506014,0.00234514139654038,0.0112918086354902,1.97505536807726  
"Adpgk",1343.73331006356,-0.261171551270569,0.147628796707878,-1.76910  
980171006,0.0768755525016046,0.161122167330569,-0.476792798690391  
"Parp6",1201.42029900098,-0.192280453470931,0.181615365370722,-1.05872  
349004413,0.28972572674428,0.433476996628298,-0.160730413002529  
"Limd1",5506.0787620114,0.451632547344501,0.155811266755065,2.89858722  
51104,0.00374848027340253,0.0159929690089283,1.86777431335983  
"Sacm1l",3320.05918170283,-0.0669972793905153,0.206724938195966,-0.324

089004331954,0.745870651331369,0.834806879332208,-0.0120966846096342  
"Fyco1",1963.12149468455,-0.398266048239187,0.256335102810079,-1.55369  
297405305,0.120257669794236,0.226877991838221,-0.590765109743102  
"Slc6a20b",7428.24316447722,2.20545530211177,0.821589132057133,2.68437  
740478583,0.00726650276395875,0.0265372299853283,8.00405299762141  
"Lztfl1",1653.20597098165,-0.0760598526059355,0.211547550938042,-0.359  
540218114896,0.719190996655479,0.81414043269295,-0.0156396099022654  
"Tb11x",3650.32918712148,-0.434376160026233,0.145047386177436,-2.99471  
897752684,0.00274697799329538,0.0126715306681082,-1.89752772349059  
"Zfhx4",39.3914129239498,-0.762400694369171,0.569364907735745,-1.33903  
702882057,0.180558618624811,0.308277753585514,-0.897158146775073  
"Ribc1",106.78816409985,0.473015523776568,0.310933235233564,1.52127682  
144127,0.128190384317109,0.237703862426533,0.679595430560899  
"Hsd17b10",4591.2353709486,0.519781160140556,0.288504976351258,1.80163  
672292334,0.0716025795934521,0.152649982837012,0.976984656483319  
"Huwe1",11060.5978694626,-0.222360830837137,0.263967907501655,-0.84237  
8275986989,0.399576248953669,0.543794074272258,-0.135458803513301  
"Fam120c",186.047356937547,-0.875296444435886,0.342405423189632,-2.556  
31594932749,0.0105787017474439,0.0354404685002854,-2.92340341212203  
"Tsr2",1055.60342295311,0.0943759626482345,0.0867794985085172,1.087537  
54366271,0.276799315791938,0.420369907637233,0.0817881177821215  
"Fgd1",509.04303602607,0.16892009447964,0.241406837178188,0.6997320227  
3039,0.484094674054567,0.621714111490683,0.0802834843450491  
"Gnl3l",1545.84575171039,0.109150510257212,0.156459356720459,0.6976285  
25037518,0.485409537764572,0.622740163783139,0.0516965108142507  
"Maged2",1533.21538838788,-0.697062766376822,0.157327511259809,-4.4306  
4763940554,9.39504977417765e-06,0.00016283082710837,-6.08033823880767  
"Apex2",640.718099860362,0.254748317716462,0.185435235108277,1.3737859  
3430592,0.169508149093915,0.293940758718709,0.311907989383037  
"Alas2",175.44751951089,0.639968364449596,0.44799213915714,1.428525879  
16753,0.153140551259741,0.272414420989182,0.832234550153229  
"Pfkfb1",359.613672864664,-2.17647592237579,0.64521952416816,-3.373233  
2033532,0.000742910031946166,0.00467870148672039,-11.6762158340841  
"Tro",79.5966075007032,-0.566917770954002,0.460017697918432,-1.2323825  
2249705,0.217806226501015,0.353188694939162,-0.590021267863655  
"Abhd6",1049.03036712835,0.0363851641937429,0.365352975243598,0.099589  
0731955395,0.92067056902354,0.951226658634901,0.00181936400606546  
"Flnb",5126.96774950917,-0.0803176320640816,0.191345061336045,-0.41975  
2835548892,0.67466602296284,0.780412797563447,-0.0199133329707642  
"Dnase1l3",271.853972880417,-1.48899528536171,0.59248230736129,-2.5131  
4725665511,0.0119659375993899,0.0388853085521508,-4.83497432223718  
"Polr3a",1061.59482154233,0.602596588349933,0.183816698862119,3.278247  
25435822,0.00104453858084801,0.00608134166896819,3.07476713265833  
"Sat1",15667.844011595,0.612416495099111,0.153392482404868,3.992480501  
63686,6.53857109344019e-05,0.000711569972138382,4.43881729385393  
"Acot9",2036.42820264163,0.0981608356020532,0.147709021267821,0.664555  
453414528,0.506334869495181,0.640989305636739,0.0436562960240425  
"Prdx4",1058.49417987093,-0.184340734563861,0.230224106621883,-0.80070  
1270030855,0.423304607142014,0.566517484388426,-0.104751131168067  
"Rps24",24937.7347798251,-0.533047528275131,0.253740776207297,-2.10075

627671151,0.0356623663942438,0.0897798347262706,-1.28485503641836  
"Ptprrj",3803.61916974205,0.155463131820199,0.375203219553365,0.4143438  
10816069,0.67862233304642,0.783570906194209,0.0379164818518885  
"Banp",1343.61610679692,0.0518270575760672,0.305263774707995,0.1697779  
49007029,0.86518476928985,0.915172388195816,0.00459409700500005  
"Car5a",117.349095683465,2.37296968911296,0.593013293337232,4.00154552  
313469,6.29300844690226e-05,0.000690107304261531,17.2720477655594  
"Jph3",1.2798821612521,0.0391285643488475,1.8085118178677,0.0216357802  
930929,0.982738491659173,NA,NA  
"Itgb8",3901.38388737871,1.12812268451005,0.470645408949897,2.39696948  
712857,0.0165313002755282,0.0497111802548193,3.38608891032102  
"Sp4",556.919198466891,-0.049398940527701,0.202635547027549,-0.2437822  
05305691,0.807399502723623,0.877322531436982,-0.00646536235679569  
"Atp10a",314.852933685117,-1.18859671675212,0.227776721857625,-5.21825  
367868393,1.80617976125821e-07,7.14338600101677e-06,-14.0840672029893  
"Ube3a",6322.78145736022,1.03547698744349,0.300151159642621,3.44985169  
69796,0.000560894592932292,0.00377454001990441,5.7774197794354  
"Padi3",3.24184857925848,-3.212896414278,1.42366264111351,-2.256782134  
68118,0.024021691605589,0.06627634681276,-8.71955092246461  
"Padi1",88.9843591658604,-2.02737999967939,0.534389679401337,-3.793823  
26760243,0.000148345279473456,0.00135160572858572,-13.3938088559961  
"Padi4",159.720724092012,-2.66398977124203,0.479400922623199,-5.556914  
15165649,2.74585723794086e-08,1.73264480341006e-06,-35.3401194193382  
"Kdm5c",2576.98601843876,-0.0890644184195833,0.137103690616206,-0.6496  
13573633848,0.515941863026941,0.649579326590757,-0.0384250901359653  
"Gpr143",5.05299157828243,0.423707119189845,0.866874306245755,0.488775  
726927273,0.62500048443801,0.742162500975133,0.126343978385525  
"Sbds",3560.73295221698,0.0164241386896188,0.116476842629442,0.1410077  
60159419,0.887863811878621,0.93047936597739,0.00118344752726533  
"Rabgef1",1562.12953737681,-0.244234322567751,0.132732870696897,-1.840  
04400180174,0.0657617775158096,0.142977602364324,-0.475052191387554  
"Mettl7b",6722.27440251969,2.2954958343359,0.77765503465477,2.95181762  
097761,0.00315909459191591,0.0140501884929691,9.79056397041374  
"Itga7",1442.95731182831,-0.884031930429574,0.282931652060105,-3.12454  
23549917,0.00178081881972868,0.00914951392544661,-4.14969408240028  
"Rdh5",703.157726441891,0.941222744693144,0.216198142179438,4.35351911  
540459,1.33969407929613e-05,0.000213409764363693,7.95549367679437  
"Cd63",48354.5545048113,1.19914994563341,0.250862910838484,4.780100580  
13507,1.75207518559039e-06,4.25429165238375e-05,12.0694408343625  
"Gdf11",599.211287883612,0.0180429701802847,0.238062735790812,0.075790  
8209378021,0.939585518951289,0.962511041050371,0.000689417229454858  
"Ormdl2",1454.24962137249,0.289057703389556,0.175581150951557,1.646291  
1982466,0.099703820739765,0.196883238483283,0.469760514881677  
"Dnajc14",3337.95962341384,-0.357193197513843,0.1505326153015,-2.37286  
249759512,0.0176508334943386,0.0522160448297094,-1.05456485856751  
"Mmp19",556.95457244349,-2.67895691333145,0.535542418349462,-5.0023244  
12673,5.66431658366294e-07,1.74475268164708e-05,-29.3514895158619  
"Dgka",1936.04970294128,-0.248581495899038,0.189299178712062,-1.313167  
3237587,0.18912657209603,0.31841722672726,-0.284474854838263  
"Cdk2",1420.42043317866,-0.376808778832779,0.127186471711095,-2.962648

25781709,0.0030500488641425,0.0136994265323637,-1.61666087680727  
"Pmel",22.3060969065736,-0.276629809383995,0.359748438148574,-0.768953  
468728469,0.441920934137128,0.583509700922065,-0.149018874413236  
"Rps26",11454.6695248325,-0.128874393731984,0.167335741054615,-0.77015  
4618013864,0.441208180361339,0.582916187876771,-0.0695550391392735  
"Pa2g4",4228.30610894031,-0.0416144673642084,0.0759814861227837,-0.547  
692200925904,0.58390326819109,0.707842944739485,-0.0143791733897115  
"Esys1",2813.48183792615,-1.40393001364965,0.16034443900753,-8.7557137  
7678849,2.02815815010289e-18,5.64928965867231e-15,-46.0590781413729  
"Smarcc2",7415.31773362246,-0.208641430949687,0.191202209503631,-1.091  
2082631855,0.275181252736756,0.41855714688051,-0.181714553167184  
"Cdh9",4.28441048597629,-1.4771907496792,1.75297449903191,-0.842676690  
673473,0.39940928691875,0.543718653657879,-0.900086811288514  
"Chmp6",2109.80805877723,0.343751531916557,0.225436969813897,1.5248232  
4527486,0.127303190345837,0.236428590490624,0.495727198428692  
"Baiap2",3668.60916442816,0.812245022734791,0.209271971433256,3.881289  
10513869,0.000103904233275245,0.00102010309184327,5.59462316835575  
"Rnf41",1380.34822114445,-0.16834886600946,0.106409531984249,-1.582084  
45117849,0.113630292701855,0.217333272222541,-0.256954794514837  
"Nabp2",1668.2962715155,-0.0364995857445815,0.214103698737061,-0.17047  
6203633485,0.864635647175563,0.914852681572238,-0.00324817954464472  
"Aatk",449.067837901811,-1.97835387149702,0.395741727068611,-4.9991035  
4703138,5.75974674427213e-07,1.76577896257576e-05,-21.6517646167098  
"Tepsin",1623.56931396886,0.179485076658597,0.184377635105394,0.973464  
469028467,0.330322510984405,0.474902545286384,0.133652784053405  
"Fscn2",4.0205705558911,-0.595320066625357,0.756917833027382,-0.786505  
536861649,0.43157137657966,0.573682758423112,-0.330806693281605  
"Cnpy2",3916.39313278591,0.316348141705353,0.206231675680475,1.5339454  
5557341,0.125043072002034,0.233645406602364,0.459954592376434  
"Il23a",41.3769853188594,-0.292030740481283,0.470454464940256,-0.62074  
1776822903,0.534769537199635,0.666641291242151,-0.11841939157772  
"Faap100",1079.2906633315,0.314990142584098,0.220755509637936,1.426873  
30024387,0.153616418085386,0.273086517125169,0.408846691162122  
"Pde6g",44.1002884687995,0.438445664341512,0.363775076835013,1.2052658  
1467912,0.228100702160482,0.364579677901884,0.442396128330378  
"Mip",0.203352729283892,-1.35109207303677,4.77055421753436,-0.28321490  
7834143,0.777012101201405,NA,NA  
"Atp5b",65822.9411972998,0.806980308564514,0.401957251531076,2.0076271  
9291836,0.0446829226847091,0.106662711764243,1.80608943427173  
"Prim1",523.587907651504,0.044928074815199,0.204394254301212,0.2198108  
50206138,0.826018469049188,0.88881525868841,0.00529548676312626  
"Hsd17b6",1.82532944521096,-0.0332791320123673,1.53532859202308,-0.021  
6755762807203,0.982706746499676,0.988843275184532,-0.00037337282151711  
6  
"Tac2",3.07668707898284,-1.78573885984484,1.32360682283489,-1.34914600  
698427,0.177290073292046,0.303894668048203,-2.12694734871788  
"Myo1a",36.7516874641433,-0.800164588150919,0.462519914496295,-1.73001  
110454311,0.0836282912503102,0.172020721890342,-1.40840196489779  
"Nab2",2318.01146207957,-0.455311819898815,0.234940896259584,-1.937984  
5192884,0.0526251112569553,0.120900721018984,-0.961976237294012

"Shmt2",6291.47156808092,1.48559669978801,0.36802255664726,4.036700123  
28052,5.4208286528555e-05,0.000614187169781651,10.9863008173865  
"R3hdm2",4180.83893540152,0.402275623168321,0.140022042044413,2.872944  
98276726,0.0040666492916464,0.0170044022921985,1.63898473684614  
"Inhbc",0.979955805755812,0.0914925638366043,1.50371895453764,0.060844  
1913700133,0.951483295869316,NA,NA  
"Gli1",542.01205997626,-1.52057485904006,0.331377321726811,-4.58865094  
061455,4.46119677143584e-06,9.1083156701001e-05,-14.1470295791005  
"Ddit3",1052.96040157167,-0.0424349803736757,0.182922855556652,-0.2319  
82932064679,0.816551270463734,0.882692059184005,-0.00529498945325167  
"Mbd6",4608.99939957168,0.0613960667259199,0.193284943581124,0.3176453  
66412885,0.750753957553593,0.837952983249182,0.0108544123828422  
"Dctn2",7338.36472069134,0.137554580446995,0.119112649302786,1.1548276  
4636802,0.248161013329449,0.387525503595835,0.13039811310944  
"Ttc4",2126.24978307246,0.268352108206952,0.127873304141078,2.09857804  
183185,0.0358541136964734,0.0901299469421487,0.645790098469761  
"Pip4k2c",6384.50645269406,0.5797860641352,0.18809788101323,3.08236361  
309365,0.00205363813862306,0.010196546072542,2.65872857006854  
"Bsnd",1785.38528904445,1.45370438782663,0.580106656250618,2.505926060  
60118,0.0122131156461584,0.0394910993148916,4.6979073470134  
"Katnal2",73.8746211415956,-1.29164530780747,0.472880503786935,-2.7314  
4123613403,0.00630579852124186,0.0237566830080486,-4.83061317628703  
"Hdhd2",2452.19144206153,0.226144484605096,0.316421524507988,0.7146937  
45808646,0.474798303154089,0.61243829815417,0.110880241756731  
"Agap2",558.57215090766,-1.02247598869838,0.33180665735118,-3.08154151  
233983,0.00205931759799021,0.0102188348150627,-4.68654191562469  
"Pias2",1425.97241954388,0.317935194864818,0.153455671626766,2.0718373  
683711,0.038280610482968,0.0948209855101526,0.748980454290161  
"Sts8sia5",1.04207279396354,1.62976522570097,1.5642488646403,1.04188359  
18898,0.297465652248586,NA,NA  
"Rnf165",134.967467357678,-0.053730731329969,0.492503473469298,-0.1090  
97162201676,0.913125425690858,0.946557337756813,-0.00295109225814372  
"Atp5a1",51837.7934574819,0.719114137899492,0.3881261676982,1.85278447  
512115,0.0639132563061256,0.139897617487064,1.41438563491415  
"Pstpip2",201.524747406903,-0.897222803614244,0.363812827914113,-2.466  
16593691428,0.0136568051105993,0.0431013897776733,-2.82104797229482  
"Crisp1",203.233251601759,-2.75300111016842,0.679703078735495,-4.05029  
960330625,5.11520991138028e-05,0.000588068177193943,-20.4786603514218  
"Avil",104.649415178499,-0.45766776091003,0.381693843587367,-1.1990441  
2554475,0.230510788359734,0.367257668854232,-0.458441943598371  
"Crisp3",3.83025770371221,-3.27122025329109,1.98876098966493,-1.644853  
38876354,NA,NA,NA  
"Atp23",218.960947862672,0.578674514805085,0.162472886698486,3.5616682  
0547097,0.000368505901209315,0.0027164945413154,3.41904802687042  
"Usp33",3393.98876641897,0.130306306024089,0.123359403429897,1.0563143  
335736,0.290824629542187,0.434471074419518,0.1086267127556  
"Clns1a",1661.26540836778,-0.167442958554579,0.183867405497144,-0.9106  
72329888177,0.362468047551201,0.507351183858816,-0.113618728433239  
"Paip1",3892.1946906694,0.208617306529483,0.0956533574796804,2.1809721  
2712894,0.0291854781441601,0.0770142716003293,0.534845650583261

"Nnt",1545.25094084295,1.49267947911811,0.327299340644168,4.5605942137  
8705,5.10090696100736e-06,0.00010097206489921,13.7336463243591  
"Cd163l1",47.6233681570305,-1.77703966450074,0.758659687931684,-2.3423  
4096363475,0.0191631991260883,0.0556100694389745,-5.13456239389169  
"Paox",897.230141835243,-1.26573527458733,0.430630014548219,-2.9392639  
4312118,0.00328992773055492,0.0144899505060673,-5.35950279519777  
"Echs1",8450.43860435844,-0.41197502944031,0.522201356867847,-0.788919  
875488888,0.430158838290998,0.572820450006685,-0.229545467233607  
"Fuom",1415.14391795454,0.422363350756464,0.320167810350415,1.31919367  
626058,0.187104371874874,0.315913884789154,0.486683215079719  
"Prap1",5.0419530430018,-0.376085398184303,1.04666141162241,-0.3593190  
63460399,0.719356414731467,0.81414043269295,-0.0773315844827398  
"Caly",3.83375936431535,-0.991513121097754,0.900732379578499,-1.100785  
47588323,0.270990034472674,0.413461163970684,-0.875696148279887  
"Msx3",0.170239085201213,-1.03638225477751,4.78078633615322,-0.2167807  
09679533,0.828379245940515,NA,NA  
"Zfp511",1113.59497277958,-0.261748529364117,0.115135561495349,-2.2733  
9430115768,0.0230024292632602,0.0641174218406073,-0.719033460340082  
"Adam8",907.137724072775,-1.24757156970318,0.427564690564103,-2.917854  
53110548,0.00352448731657982,0.015305796489843,-5.21425490158393  
"Tubgcp2",808.896397888131,-0.526914144656845,0.127521108977053,-4.131  
97586567147,3.59658191253755e-05,0.000450734837584457,-4.0596792295880  
2  
"Adgra1",496.734109277834,-1.65213785227403,0.646060800744853,-2.55724  
825027189,0.0105503894242266,0.0353749819381806,-5.52103238420427  
"Inpp5a",2063.0320576075,-0.429321188819543,0.172513839647719,-2.48861  
882441568,0.0128240375556963,0.0409302806123698,-1.37206120445509  
"Dpysl4",34.9662611283854,-1.22566920093833,0.507439920378369,-2.41539  
766919484,0.0157180384394889,0.0478087413512404,-3.72670454562528  
"Cyp2e1",31394.4225561674,0.913240943936664,0.685558312670528,1.332112  
71318295,0.18282315334749,0.311013755279343,1.0665906633239  
"Syce1",4.08462307923617,-0.678996034709237,1.324508538794,-0.51263998  
2923389,0.608203179322263,0.728311736237813,-0.215259473845555  
"Urah",111.910010110743,-0.826945245216037,0.660388082186207,-1.252211  
0369988,0.210492975333916,0.344311412169521,-0.881696267121009  
"Odf3",0.738493350834187,-2.11133973920993,3.66695513996185,-0.5757746  
30074121,0.564767523702761,NA,NA  
"Bet1l",1467.41136561341,-0.0620314919569345,0.134400574366886,-0.4615  
41866536978,0.644409891461821,0.757366128012212,-0.0172390780087207  
"Ric8a",2276.58598086652,-0.293701183620314,0.0991043718381436,-2.9635  
5426277242,0.00304108439268097,0.0136734405314807,-1.26065358313862  
"Sirt3",2945.81046300372,1.34308146732437,0.259136164189594,5.18291791  
315442,2.18441194102928e-07,8.2456588118601e-06,15.7218748722235  
"Psm13",4368.57441088562,-0.125738150503456,0.308670583685156,-0.4073  
53849538539,0.683748117570028,0.787368343750319,-0.0300588496983356  
"Cox8b",1743.49936549365,-3.95517994996737,1.57420041171168,-2.5125008  
992132,0.0119878799586833,0.0389501222186982,-12.8364311965679  
"Ifitm5",49.8333255287204,-1.02175290398278,0.406967507221308,-2.51064  
983285547,0.012050916914655,0.039089798369979,-3.31241436091248  
"Ifitm1",815.367679192351,-1.31350717355541,0.440612860811643,-2.98109

131707102,0.00287223131605316,0.013075593322532,-5.69669097746762  
"Ifitm3",6683.17309752018,-1.19310189456331,0.233536905500062,-5.10883  
661838617,3.24148492281602e-07,1.1429018630211e-05,-13.5767299413632  
"Sigirr",3013.9632258673,1.30421664802415,0.284146503889901,4.58994437  
788156,4.43364140449253e-06,9.06154508436011e-05,12.1408038614472  
"Ptdss2",2306.91861963401,0.562217082512238,0.21002297141502,2.6769313  
7909786,0.00742998505247967,0.0269625625448071,2.03146232806884  
"Drd4",2.31199713253182,-4.50443943585093,1.57699685475569,-2.85634015  
20219,0.00428555735795842,0.0176733919977735,-18.1785439226614  
"Cdhr5",6130.83073599355,1.63995759430206,0.578845725053939,2.83315143  
106438,0.00460915455086433,0.0186373487002805,6.53127497138753  
"Irf7",2800.67324681032,-0.704320238710149,0.35147254548878,-2.0039125  
3243031,0.0450794308276678,0.107268579726369,-1.5723382341805  
"Hras",2657.27481531287,0.660899191341809,0.183530768296679,3.60102666  
967241,0.000316963057281128,0.00241223485201695,3.98337268774307  
"Lmntd2",369.83453744522,0.670425337820276,0.250219274164446,2.6793513  
0120978,0.0073764958255409,0.0267983818905155,2.42654669980397  
"Talido1",14373.9869696308,-0.396067408114841,0.434176467886018,-0.9122  
26795807871,0.361649340946936,0.506423787711954,-0.269476911529788  
"Eps8l2",7845.95758342271,0.735618628914092,0.264863670930538,2.777348  
15926119,0.00548044398601078,0.0212884145751726,2.83183178819896  
"Tmem80",1469.07850087184,0.12880093589074,0.133854507215725,0.9622457  
88878513,0.335926153299799,0.480478883292215,0.0944074794400543  
"Pidd1",371.811663317594,0.00907310902893917,0.221082255173218,0.04103  
95172684954,0.967264392160644,0.980031236663284,0.000183012173176718  
"Rplp2",12874.8923347256,-0.479869127659927,0.315128297730364,-1.52277  
383883348,0.127815297234277,0.237233951972768,-0.690391785952762  
"Pnp1a2",14336.4453836762,-2.41395769887611,0.715441946110363,-3.37407  
907378097,0.000740630894005179,0.00466736301593826,-12.9560996930147  
"Cd151",6628.19497845952,-0.699515737911385,0.239156116096731,-2.92493  
350924152,0.00344529829173561,0.0150350103160835,-2.93612901449112  
"Tspan4",2773.68948926541,0.452284245917671,0.106091310887186,4.263160  
12249689,2.01555977631816e-05,0.000290783946044037,3.68291896365822  
"Chid1",1512.80173083518,-0.454839559142262,0.278635990999881,-1.63237  
906743518,0.102599656024828,0.201236102320902,-0.729233540901323  
"Muc2",37.5368343217253,-1.01544908823451,0.44556070000992,-2.27903647  
743596,0.0226648970072553,0.0633940843275661,-2.800999258092  
"Tmem192",872.21969768893,0.0820661309872567,0.338531513935808,0.24241  
7995397669,0.808456291849064,0.877981551658296,0.010679240787768  
"Apool",1582.24726150051,0.519909605119974,0.308347548852669,1.6861155  
7657749,0.0917735403568512,0.18489424554011,0.87759247284421  
"2010106E10Rik",0.377176584997985,-1.46274577043762,4.76608547779842,-  
0.30690716254491,0.758914037090838,NA,NA  
"Zfp711",131.656607868892,0.875981436388901,0.2207348664637,3.96847788  
671826,7.23331679865117e-05,0.000770263303878212,6.27971657965939  
"Chm",1011.2886983265,-0.0591181717751901,0.127518169535819,-0.4636058  
68798047,0.642930148853425,0.756128357702158,-0.0165261380080668  
"Crcp",959.904235063649,-0.0137860572453753,0.104069804304039,-0.13246  
9329961451,0.894613080353635,0.934839264737402,-0.000928913826836012  
"Asl",5088.53439180873,1.7541239554022,0.365341564510391,4.80132600776

749,1.57618424213446e-06,3.92997958480021e-05,17.7943442638025  
"Gusb",2341.39017744603,-0.407799235239187,0.18884279540245,-2.1594640  
8953601,0.0308141804054837,0.0802964097932769,-1.02848205570813  
"Phkg1",558.555578118988,0.0828190564583155,0.305969640180624,0.270677  
366582595,0.786639186029308,0.862066706901947,0.0122922217691276  
"Sumf2",868.540868983262,-0.0974829704751051,0.207544316419732,-0.4696  
971333966,0.638571416205119,0.752681989672797,-0.0276961270233673  
"Tm9sf2",7296.98432220531,0.0608125394066343,0.219828357439393,0.27663  
6463625492,0.782059263002178,0.859027182131512,0.00924075200721919  
"Clybl",3198.0161618623,0.879436298780947,0.45503791903992,1.932665964  
71006,0.0532773605477562,0.122039705822386,1.84981407596015  
"Fgf14",8.22479444619517,-3.43301089421796,1.29804513498012,-2.6447546  
404236,0.00817501708723181,0.0289548561610982,-12.1597841362834  
"Farp1",2635.94873396345,-0.139295342828182,0.212905476496639,-0.65425  
9087743011,0.512944899294538,0.646962911342578,-0.0606584289652254  
"Slc15a1",15.666236570391,0.124448716091615,0.515090712432474,0.241605  
435873453,0.809085909642563,0.878225077448683,0.0161599601993509  
"Dock9",3364.47904002526,-0.119916374169962,0.320133491691473,-0.37458  
2407908545,0.707971058456503,0.806372100212635,-0.025807200512471  
"Tnrc6c",3327.18758593692,0.256699171761704,0.18669242438928,1.3749844  
0336524,0.169136280093895,0.293407746828895,0.314762473382349  
"Tmc6",2407.4639486342,0.435661169417933,0.16813968323937,2.5910669095  
154,0.00956788869355381,0.0326830227307134,1.49035308466823  
"6030468B19Rik",4.62407253902719,-3.70054680919536,1.29348466200158,-2  
.86091278691239,0.00422423238619746,0.0174776768571376,-14.97548688014  
31  
"Tk1",506.963299685833,-0.211716316653925,0.360787719403207,-0.5868168  
6007532,0.55732671212962,0.686422603316488,-0.0796607626287787  
"Cant1",3521.05351227184,-0.109326223480379,0.0756105140837255,-1.4459  
1297659106,0.148201611762581,0.265469455778301,-0.144994503989901  
"Rbfox3",44.5053540691751,-1.61992023573781,0.778515434480531,-2.08078  
114317504,0.0374539429183321,0.0931713420543046,-3.84458114535814  
"Cbx2",403.006569753395,0.179606298785051,0.245865481193469,0.73050636  
4346934,0.465080724166176,0.603906352529865,0.0905819471882353  
"Cbx8",511.572929181477,-0.182275897356122,0.233125332138169,-0.781879  
410891693,0.434285446110115,0.576386742104351,-0.100429720708281  
"Gaa",3876.09038392075,-0.121255635052539,0.128160912385578,-0.9461202  
54572901,0.344087254044844,0.488655425792926,-0.0868308799933328  
"Eif4a3",2988.25957449672,0.345088334920844,0.194659095429799,1.772782  
99870296,0.0762646716410841,0.160151703571121,0.632075446368314  
"Nptx1",7.13089081335542,-4.11299013071332,1.18423350452543,-3.4731242  
7405231,0.000514437092819706,0.00354050170985102,-23.2116056589989  
"Rptor",1561.73204482424,-0.217235966000343,0.145453320471641,-1.49350  
984423005,0.1353037793447,0.247574426582485,-0.303270973156705  
"Pde8a",1954.99526363292,0.285205725515744,0.223206549214351,1.2777659  
3706421,0.201331968184422,0.333127182252195,0.313506955821958  
"Cpeb1",1098.75871638509,0.061015729228376,0.192914757232306,0.3162833  
68383797,0.751787433817722,0.838578454495305,0.0107416444308017  
"Nat1",24.8685947093957,0.14769753596349,0.704280029381134,0.209714218  
49527,0.833890727547183,0.89375155694601,0.0165904865430137



"Tma16",579.818819164162,0.0594590267028949,0.195382749652008,0.304320  
759170377,0.760883531176135,0.845194957606807,0.0100002923557038  
"Dach2",5.37802603088385,-2.43829671064474,1.23496699039079,-1.9743820  
9249072,0.0483383126939261,0.113485902577504,-5.30592055277826  
"Klhl4",114.234403878466,-1.20513516627795,0.37666605950115,-3.1994790  
501539,0.0013767619280805,0.00752305564578233,-5.89284931340389  
"Zfp202",293.553369577941,-0.350915350747432,0.16976520661595,-2.06706  
284369145,0.0387282326946055,0.0956865787173977,-0.823485064535766  
"Copg2",1768.79148792552,0.0148967153387832,0.227596748973957,0.065452  
232538206,0.947813937647926,0.967716193970742,0.000488856907999892  
"Podxl",15723.0658961357,-0.463472354875627,0.370229433589224,-1.25185  
172443598,0.210623898419714,0.344467771463478,-0.493947861169329  
"Mkl n1",4894.66525030265,0.29932983973946,0.196016708021461,1.52706288  
540816,0.126745374834514,0.235786214019464,0.432480659705245  
"Map3k7cl",1035.61378051579,0.603487444124887,0.420846615597657,1.4339  
8431104847,0.151576740053734,0.270323175484104,0.789444308716609  
"Bach1",1742.10059240816,-0.293096979398121,0.16559777515669,-1.769933  
07501137,0.0767382901771478,0.160920970302649,-0.53544184337217  
"Cct8",7292.68139683699,0.123718060196324,0.107841213544735,1.14722429  
514392,0.251288932988275,0.391281873135711,0.116088005618252  
"Usp16",2318.63048655264,0.458832610737648,0.203432727267264,2.2554513  
0766913,0.0241050153421204,0.0664498217362736,1.24403660913832  
"Phf6",797.622905478208,-0.574920985192322,0.144508887201584,-3.978447  
25210797,6.93667958557589e-05,0.000746420411476593,-4.13955847416568  
"Hprt",4589.61069258772,-0.0207404847082422,0.184003222131876,-0.11271  
8051716384,0.910254089258972,0.945059346995571,-0.00117199402659308  
"Ccdc51",618.926025146036,0.402862595022794,0.158118828160242,2.547847  
08254049,0.0108389971313235,0.0360831084286402,1.33828151501025  
"Atrip",817.197636839099,-0.022836950005307,0.130049984881777,-0.17560  
1327643884,0.860607159252532,0.911681431725247,-0.00211161075484472  
"Shisa5",6222.76302313117,-0.494392935741053,0.216410564050603,-2.2845  
1387255499,0.0223413482388911,0.0627140236052259,-1.36905818196939  
"Pfkfb4",907.997553640277,-0.374266594609491,0.189785084764164,-1.9720  
5483810581,0.0486033467206872,0.113951028577994,-0.812901989679482  
"Col7a1",1162.34131067734,-0.382015350118139,0.299044653011164,-1.2774  
5253516998,0.201442527519279,0.333253555198618,-0.419778198458682  
"Uqcrc1",16743.9625313755,0.372654177392904,0.399194958811354,0.933514  
23700971,0.350554523132362,0.495477498516476,0.261690186878711  
"Tmem89",1.14469579297437,2.26121111668969,1.41903091342183,1.59348968  
038832,0.111050381549881,NA,NA  
"Arhgef9",311.91660099468,-1.2821650910996,0.401590730920934,-3.192715  
84819529,0.00140941563802681,0.00766335362806659,-6.24581796350873  
"Cnksr2",14.7583680135485,-0.236540825470069,0.408399499023312,-0.5791  
89803209251,0.562461110346359,0.69047829311423,-0.0876078013032181  
"Rps6ka6",385.744484949688,0.555978951308392,0.280755571648156,1.98029  
534389846,0.0476703516887664,0.112242062218037,1.21598015781709  
"Tmem47",798.91612934225,-1.13468598443429,0.23324253006145,-4.8648331  
1656475,1.14553421267468e-06,3.06387189008653e-05,-11.7930705976802  
"Alox5",42.3279095629962,-0.963778336028355,0.479320523814618,-2.01071  
785609812,0.0443552668714732,0.106180355243706,-2.16138487696988

"March8",6020.39553033454,0.690547035041619,0.170597662378486,4.047810  
65234985,5.16989415904055e-05,0.000592607856043343,5.13143959472041  
"Myo3a",3.23280153065283,1.87243781416152,1.12002774936709,1.671778056  
58797,0.0945680953992103,0.18921382494549,3.11737968898981  
"Wdr73",1313.65515190063,0.171095675138551,0.127471079810126,1.3422313  
154749,0.179521005723153,0.306890555141827,0.202109177485628  
"Nmb",132.454384403706,0.133617819674,0.1982768656978,0.67389515768143  
8,0.500377970907525,0.635594115749506,0.0605549414363688  
"Sec11a",4157.95525099403,0.700969038589897,0.216711571966623,3.234571  
33474099,0.00121825483875577,0.00683751665113992,3.49456245098723  
"Slc28a1",445.98986402352,1.99547980958922,0.815979653821229,2.4455019  
1937311,0.0144650678662925,0.0450831031420991,6.18448632169757  
"A930017K11Rik",254.558122383095,1.55646048611587,0.543390031301839,2.  
86435230029331,0.00417862977694758,0.0173314025507177,6.31181342320308  
"Pigq",5821.25698345075,0.542777498595096,0.142162417335449,3.81800977  
198038,0.00013453259805156,0.00125268223343329,3.62709339565806  
"Rab40c",1442.3824574738,0.00399062658683227,0.166586228862668,0.02395  
53210014863,0.980888247144798,0.987676050548919,4.9485841050553e-05  
"Mettl26",6873.13187294529,1.74583769599242,0.407986277028968,4.279157  
88909847,1.87601751921624e-05,0.000275026989396077,14.3134970756156  
"Mcrip2",3736.80647435108,1.41024901773977,0.463712933043468,3.0412113  
1253324,0.002356283996126,0.0113215439518149,6.31939329224725  
"Rhot2",4517.13623089039,0.68714939205354,0.134064870448045,5.12549924  
344154,2.9675035812162e-07,1.05756066307006e-05,7.87264342179139  
"Rhbd11",485.805596483383,0.235331796337301,0.261623045610806,0.899507  
135496709,0.368382596813137,0.513381736306378,0.156904082942835  
"Jmjd8",2926.71920166165,0.431819783426354,0.154457747507293,2.7957146  
2354754,0.00517851048000513,0.0204228554488552,1.68025423571223  
"Wdr24",1411.97846378362,0.250399897412826,0.133895701072716,1.8701115  
5254968,0.0614683285487097,0.136024227674809,0.499528330363402  
"Fbxl16",142.274495958041,0.13313362867427,0.255485170838618,0.5211011  
98309338,0.602296276224799,0.723839545970854,0.0430268627094132  
"Gng13",1.63627449657215,-1.94950784325254,1.70730974339415,-1.1418594  
960847,0.253512427060595,0.39392979750482,-1.81612751609445  
"Prps2",1863.67208244236,0.687744286651146,0.211843372412417,3.2464753  
5025191,0.00116843565940586,0.00662464625969625,3.45038440946039  
"Sdc3",2924.51812472861,-1.40828997167216,0.245758012614169,-5.7303929  
0435312,1.00198272842766e-08,7.97414662811532e-07,-19.7750542981774  
"Hadha",9790.88871415513,-1.16663970064228,0.493142580408777,-2.365724  
93836412,0.0179948082369211,0.0529748974923613,-3.42751407033982  
"Il6",12.4283209810181,-0.627412254824915,0.748009429901814,-0.8387758  
62634875,0.401595098021055,0.545589549973142,-0.38014176073213  
"Tyms",872.617188286772,0.406803614948795,0.206645204181746,1.96860902  
995362,0.048998004832771,0.114579407319425,0.881334817642485  
"Hspa4l",1768.60567999839,-0.0626415526901568,0.206606622718254,-0.303  
192375278212,0.761743259362759,0.845664505366508,-0.0105007640772085  
"Plk4",249.505089017112,0.129782241783984,0.412701352682239,0.31447011  
4867567,0.753164010887708,0.839656463060073,0.0226810616768815  
"Mfsd8",555.735060733523,-0.68837385820372,0.348463634017162,-1.975453  
93838663,0.0482166568897947,0.113268479040629,-1.49927437908233

"Larp1b",3600.10825718293,1.27408204187744,0.258893849654526,4.9212526  
4303344,8.59920374100377e-07,2.46207451603659e-05,13.5204581940463  
"Jade1",4069.58466997324,0.243314492080369,0.146191618878899,1.6643532  
2316202,0.0960418620961655,0.191318372205868,0.402397489679715  
"D3Ertd751e",883.301272240261,0.235273396362302,0.228037626854853,1.03  
173059467092,0.30219834082024,0.446722005254968,0.189587723579965  
"Crispld1",78.893748638192,-0.493426049049911,0.293436878523302,-1.681  
5406827289,0.0926579412312568,0.186156057509227,-0.82953304037848  
"Gdap1",4.76710364738094,-0.397104211774077,1.05238814159484,-0.377336  
266039908,0.705923724270529,0.804612885314632,-0.0863280750138764  
"Ly96",204.595887281417,-0.0902659011799744,0.202975570104199,-0.44471  
3130420748,0.656527079132892,0.766111974919691,-0.0240492677084351  
"Itih5",1607.00483760748,-0.963293675434724,0.374986032180334,-2.56887  
881885549,0.0102028129086435,0.0343760922918145,-3.24667917357984  
"Atp5c1",14604.8080537987,0.833034331971757,0.336732001500492,2.473879  
31132093,0.0133654839078571,0.0423475119518404,2.63392594491714  
"Taf3",1637.57939279604,0.114821596732384,0.176972303832665,0.64881110  
9115429,0.516460476026772,0.650051408015622,0.0494541014753393  
"4930412013Rik",50.956836274714,-0.952142230721287,0.529488051943513,-  
1.79823175844365,0.0721402887865,0.153490981095502,-1.78442257876919  
"Clec3b",626.371430868941,-3.42170082738043,0.753218644915379,-4.54277  
234170808,5.55192001185278e-06,0.000107712772528463,-31.2608037954515  
"Exosc7",1744.74320135277,0.414513896168479,0.123778535517185,3.348835  
03376828,0.00081152098788248,0.00501046112151127,2.19535982468139  
"Zdhhc3",2834.7751962404,-0.204928030673464,0.151673299806402,-1.35111  
47376304,0.176658681206601,0.303025509471832,-0.244671421970338  
"Tgm4",16.1150143779441,0.28399432654629,0.617063734672211,0.460234997  
762669,0.645347552787942,0.758044543758034,0.0786701573596227  
"St8sia2",85.3141697354231,-1.38523948875249,0.551768844984292,-2.5105  
4314020198,0.0120545592082607,0.039091896889023,-4.49072488694407  
"Slco3a1",6941.89344592189,1.18498948299516,0.366900578738049,3.229729  
11918242,0.00123907554505432,0.00692844708272702,5.89190940703173  
"Pgm1",3369.25332408205,-0.651304966033601,0.560832034446262,-1.161319  
12235838,0.245512145817393,0.384652134925474,-0.622267119506707  
"Slc25a10",12763.7984903356,0.501118069539004,0.501389923119486,0.9994  
57800071467,0.317572972016732,0.462610221022206,0.38629710410088  
"Hgs",2486.88227655681,0.0958312500870423,0.101157516162144,0.94734680  
8451049,0.34346208615206,0.488071114043647,0.0687391958649086  
"Rpl14",19707.6190184622,0.058115364376802,0.188444915896387,0.3083944  
40361319,0.757782211907408,0.842854396336032,0.00993546410629986  
"Rassf3",3139.91904787357,-0.267954139258512,0.174714851840638,-1.5336  
654922898,0.12511196727031,0.233729341557584,-0.389495857362341  
"Ccr1",122.505302299725,-1.53884301311573,0.447118893859281,-3.4416863  
9314992,0.000578100038099785,0.00385416619912237,-8.55381367465255  
"Itgb1",16238.1977077744,-0.726844614906854,0.201140185914076,-3.61362  
206962139,0.000301949097191033,0.00231878830131184,-4.40955586705182  
"Nrp1",4149.45426625297,-0.491645846643525,0.203071658700358,-2.421046  
0966834,0.0154759146749709,0.0472295170343689,-1.50086508392813  
"Pard3",2005.87990382604,0.777231986340397,0.183535306978529,4.2347818  
4734953,2.28773687267144e-05,0.000318844128258383,6.25734564951087

"Homer2",305.856617296588,-2.26243980126343,0.563644704857562,-4.01394  
669685608,5.971183643921e-05,0.000663396801647702,-16.5568449914249  
"Dhtkd1",1126.38387379089,0.823489888272803,0.218593123556024,3.767226  
8682402,0.000165070981939863,0.00146231440520829,5.37552367469109  
"Sec61a2",1225.83216047833,-0.183317294370319,0.216987638593709,-0.844  
828284036793,0.398206720291538,0.542610733733863,-0.112073428804296  
"Nudt5",2238.64872585517,-0.41714776987508,0.275601133712822,-1.513592  
35811327,0.130129260515552,0.240248113013184,-0.59488737874208  
"Zfp282",982.551038526264,-0.150458111013467,0.125041937797296,-1.2032  
6119111631,0.228875262065396,0.365458181946694,-0.1514516490552  
"Pdia4",5911.71085015224,-0.386490205833134,0.158056904912728,-2.44525  
986413903,0.0144747805317081,0.0451061644250032,-1.19763125295459  
"Isu",7518.97267229274,0.88366138010215,0.238259380881803,3.708820936  
37489,0.000208226613933387,0.0017469890354876,5.61112739779493  
"Pramel7",28.8923411112365,0.814586122038688,0.54130318718869,1.504861  
12278281,0.132359785312928,0.243375244627637,1.15113303829049  
"Fam20c",2065.30946361525,0.317168611098468,0.329723160843299,0.961923  
967631751,0.33608779808562,0.480533833473155,0.232439439810178  
"Prkar1b",355.681319335041,-0.603941578347075,0.200744593953539,-3.008  
50730997445,0.00262534486103617,0.0122637695497085,-2.6580108608601  
"Pdgfa",4041.493265417,0.00749321272368076,0.343169732060212,0.0218352  
961337686,0.982579338649583,0.988843275184532,8.40695597417902e-05  
"Dnaaf5",719.993974250584,0.0985426499732361,0.167732161609375,0.58750  
0029974742,0.556867930337719,0.686291062873703,0.037096720686457  
"Get4",2562.49454018033,0.0788246227954494,0.128402885247864,0.6138851  
36952254,0.539291232499587,0.67020568239919,0.0315432985736214  
"Xiap",3404.21313250362,-0.431399784358838,0.164093854125564,-2.628981  
9728942,0.00856409006832118,0.0299789278549598,-1.5130314445101  
"Stag2",3252.37432311415,-0.21873227035753,0.100739706227359,-2.171261  
74523354,0.0299113922918156,0.0784731333296315,-0.55667340131172  
"Cplx2",1978.06609660767,0.563734773619396,0.289619713039256,1.9464654  
7951999,0.0515988507092452,0.119160771186647,1.19922265590465  
"Higd2a",4210.56604944157,0.87796797668061,0.274717329826677,3.1958958  
5860685,0.00139397415898896,0.00759655818149191,4.28453640877795  
"Nop16",1468.09846747901,0.127931050688426,0.187162152276949,0.6835305  
59635385,0.49427164658796,0.630247037464415,0.0590585269320993  
"Arl10",257.094173853015,-0.518222098794009,0.267135108835079,-1.93992  
508530185,0.0523887949511017,0.120485577253666,-1.09667467713107  
"4833439L19Rik",17049.0284278303,1.38161673158969,0.35219639609791,3.9  
2285879951368,8.7504439338099e-05,0.000890016462292256,9.7048497860342  
1  
"Thoc3",1472.5502475383,0.031289143433107,0.186602279001017,0.16767824  
9165095,0.866836408549259,0.916273245901195,0.00273594320888419  
"Faf2",2359.89691082418,-0.135289948932511,0.155552006340176,-0.869740  
944624308,0.384441991037891,0.529161847486556,-0.0861067686162889  
"Tspan17",916.108973557553,-0.577783857717477,0.235833332872018,-2.449  
96689264036,0.0142869350486682,0.0446564058318264,-1.7961899093043  
"Unc5a",470.404864682348,-2.36546354898893,0.497978255314277,-4.750134  
21518993,2.03281684284857e-06,4.81871058438007e-05,-23.5136990103401  
"Hk3",389.856887862687,-1.4364035629138,0.568834002972172,-2.525171764

36105,0.0115641752712411,0.0379593079863063,-4.69882156031556  
"Uimc1",2501.03393606295,0.281593543508402,0.206987332230242,1.3604385  
3734571,0.173691190314642,0.299516302180497,0.339485355276357  
"Smad7",1481.29584959775,-0.166038605884974,0.151189016050982,-1.09821  
870809044,0.272108998989114,0.414753162172851,-0.146125882406388  
"Myo5b",2912.88070890077,0.817864146765613,0.245513558363569,3.3312382  
1029255,0.000864605809106793,0.00526979808251461,4.29032166960931  
"Casp12",1010.84273322953,-0.914229640526732,0.17845803257301,-5.12293  
914342413,3.00809458058913e-07,1.06639687513321e-05,-10.4666859452223  
"Casp1",443.866894740709,-1.06819575373168,0.261739275542854,-4.081144  
30482859,4.48145194543725e-05,0.000533451465397653,-8.05007538096208  
"Snca",117.029226211001,0.618845425034891,0.300578210163286,2.05884992  
361459,0.0395086174620686,0.0970078105119523,1.4437439638684  
"Gria4",315.039476542213,-0.875526229291095,0.313554867378905,-2.79225  
845418975,0.00523415300672678,0.0206131115583031,-3.39864216351873  
"Kbtbd3",321.641114272396,0.42368500858746,0.150606914664343,2.8131843  
0519425,0.00490535266049639,0.0195872550019166,1.66630067778209  
"Aasdhpt",1287.90903559466,0.101276821230014,0.212298902791822,0.4770  
48255540561,0.633327759913602,0.748446855130336,0.0293454733842838  
"Cwf19l2",2357.13007819149,0.604241888256016,0.274510132252042,2.20116  
424592018,0.0277243984417088,0.074040586332891,1.57292736023913  
"Alkbh8",974.044591432884,0.216182740557608,0.123357017666497,1.752496  
49065018,0.0796884727759434,0.165876571173838,0.388374739376647  
"Rp1",22.8361373578782,0.59885761095481,0.44015662039219,1.36055572768  
896,0.173654130548806,0.299505372617481,0.721996463359107  
"Sox17",1523.80677373855,-0.320792275298694,0.237382122660212,-1.35137  
503912995,0.176575325435319,0.302989148582051,-0.38304467484617  
"Lyp1a1",8996.07643322677,1.00223309764396,0.320101669631064,3.1309836  
6153193,0.00174221852969043,0.00900238677426743,4.72078402254266  
"Oprk1",0.488178588788027,-1.78247207366888,3.77462455369514,-0.472224  
998357502,0.636766198250702,NA,NA  
"Rb1cc1",3075.00092635621,0.408718236786593,0.122996037191907,3.323019  
55508439,0.000890486717299435,0.00539382106676122,2.13453149330256  
"Sntg1",73.229247736107,-0.683268490992105,0.512930174810634,-1.332088  
70241326,0.182831042312638,0.311013755279343,-0.798001664154618  
"Adhfe1",7260.45993178328,1.32831473312694,0.520223266837025,2.5533551  
0309475,0.0106690660023798,0.0356757758385187,4.42764940800583  
"Mybl1",159.958405973123,-0.221331041323089,0.282026197995168,-0.78478  
8941227656,0.432577325057149,0.574667349183368,-0.122609413206384  
"Sgk3",1163.67825868449,-0.175570790482397,0.0813716963918239,-2.15763  
955118967,0.0309558671289213,0.0805629334329561,-0.442213067660975  
"Ppp1r42",15.1093073203782,2.69297129638504,0.484606117479552,5.557031  
1625269,2.74401785820722e-08,1.73264480341006e-06,35.7245843187777  
"Cops5",2862.5413721264,0.292918852100693,0.143428043959501,2.04227042  
365162,0.0411247142138286,0.100010195258576,0.674440719991837  
"Stau2",877.374799131277,-0.0549807482438277,0.18960918340837,-0.28996  
8804545786,0.771840103141744,0.852438480943061,-0.00877790933056  
"Rdh10",3234.64072144374,0.265772089705665,0.231284838726773,1.1491115  
9403593,0.250509968227571,0.390255941235313,0.250078911049405  
"Gm5045",0.485947653249792,-1.09283392030318,2.60139201932969,-0.42009

5822614529,0.674415454256636,NA,NA  
"Terf1",849.581920516619,0.2152615262169,0.15797595328337,1.3626221063  
5801,0.173001638124568,0.298512030102021,0.260239355523225  
"Tfap2b",3028.30618084425,1.44884486260952,0.595963893896891,2.4310950  
3351924,0.0150532656394235,0.0462785048340853,4.45241281505801  
"Il17a",0.751411000708648,-2.05552594007546,2.39517984190323,-0.858192  
735307142,0.390786046809755,NA,NA  
"Msc",52.3630092243147,-1.19374876912694,0.423931348837393,-2.81590114  
154268,0.00486406313778385,0.0194662362603673,-4.70226448589313  
"Paqr8",224.763655516464,-1.56877802945927,0.346965283639061,-4.521426  
50413183,6.14242867609919e-06,0.000116256100862452,-14.2126818990291  
"Eya1",44.3634860707754,-0.79759347344439,0.397140019284663,-2.0083432  
4095827,0.0446068298841063,0.106521000499731,-1.78614129322912  
"Tmem14a",281.496476326495,0.172161016763368,0.241934494384049,0.71160  
177965395,0.476711404698777,0.614215222944344,0.0839129816036673  
"Gsta3",2898.61820315018,-0.640017958160098,0.615383395451219,-1.04003  
124375954,0.29832538523428,0.442674913340791,-0.521563183738376  
"Tram1",5192.06908042441,0.182439456980648,0.11296882674041,1.61495398  
549083,0.106320659982596,0.206272659536383,0.287990971587035  
"Gm4956",209.337219013324,1.48170860338796,0.507614927284529,2.9189618  
4242319,0.0035119920989841,0.015261789234993,6.19710252275201  
"Lactb2",20717.2460020765,1.54280295279787,0.474088273295491,3.2542525  
0887036,0.00113691175117726,0.00648931654697136,7.77202116574827  
"Slco5a1",63.0713532705302,-1.84227972544472,0.531652468578285,-3.4651  
9546946003,0.000529846219922815,0.00362362034235533,-10.3541309504349  
"Ube2w",2065.70700302043,-0.182792256184341,0.203399650737145,-0.89868  
5201876598,0.368820361411552,0.513786888720227,-0.121729902147277  
"Tmem70",2467.09345409075,0.169410952782954,0.341820923780714,0.495613  
17343942,0.620167356675727,0.738263820774365,0.051408437625249  
"Pth2r",3.93122165023066,1.74905072240032,0.8942633712265,1.9558563826  
6885,0.0504820747314946,0.117276241286153,3.7486058945609  
"Pikfyve",2099.1279046745,0.243328975350511,0.122695493857534,1.983194  
06605958,0.0473457564720159,0.111639564601689,0.533493855994121  
"Idh1",14453.6517593205,0.421095288825778,0.382788439895064,1.10007316  
036298,0.271300246886708,0.413783808964098,0.371579385302104  
"Akr1cl",0.263212321644214,2.34899760513778,4.74735974378913,0.4948008  
43397411,0.620740708968433,NA,NA  
"Mettl21a",567.482327342433,-0.273437179599514,0.162380434644926,-1.68  
392934898489,0.0921953235579916,0.185475074157421,-0.460696469536556  
"Creb1",2406.87462305729,-0.187481998540162,0.127581889764727,-1.46950  
322562157,0.14169634756263,0.256598438262855,-0.255021059846233  
"Klf7",3541.43897681105,-0.283376296300357,0.236331462978148,-1.199062  
92936781,0.23050347718349,0.367257668854232,-0.283855650630331  
"4933402D24Rik",0.102419796623515,1.37442010063246,4.78471990596623,0.  
287251945284957,0.773919414831981,NA,NA  
"Fastkd2",988.312800391704,0.723093418086642,0.20854475030061,3.467329  
75557682,0.000525656600136335,0.00360128334134162,4.06845981824041  
"Mdh1b",9.76476788042871,0.64250177290804,0.524681232797011,1.22455642  
158753,0.220742395713098,0.356586178203633,0.662534550441262  
"Adam23",231.979121685474,-1.35877340365827,0.314243437050005,-4.32395

157211207,1.53258953232338e-05,0.000236038157197798,-11.3478192925325  
"Eef1b2",12081.3869209629,-0.21853679924166,0.292160844531259,-0.74800  
1668711901,0.454459151013333,0.594700974930064,-0.113572823434465  
"Ndufs1",7366.62939401492,0.668740757956589,0.328818044475299,2.033771  
47085621,0.0419746422495322,0.101618482247067,1.52909570397702  
"Nrp2",2521.55185465661,-0.974698112154193,0.167285224628572,-5.826564  
26661913,5.65800846306572e-09,5.20376646287054e-07,-14.1026272149971  
"Maip1",1272.53240642825,0.468581016724715,0.19363601664565,2.41990630  
070752,0.0155245067743261,0.0473506934602932,1.4292535469721  
"Boll",4.42077315688008,-0.103007850603931,1.23552800767887,-0.0833715  
221053117,0.933556131727469,0.95858009670979,-0.00435745409803466  
"Rftn2",334.899416047764,-1.12474851306436,0.239283119409335,-4.700492  
52049529,2.59534762588001e-06,5.87054385259958e-05,-10.9584002274275  
"Mob4",3285.72977042148,0.19104348602847,0.137075000466922,1.393715012  
78653,0.163403680900073,0.285806849497834,0.239270321714787  
"Hspd1",19781.1486943581,0.309672363000397,0.38876728088904,0.79654944  
8019989,0.425712746579804,0.568655542503614,0.174803979838368  
"Coq10b",1876.14833108774,0.740762350292599,0.185735359099089,3.988267  
79071941,6.65575078686718e-05,0.000722571430079824,5.35770761209847  
"Sf3b1",13762.7097003805,-0.000544529493334727,0.116642026633982,-0.00  
466838162066095,0.996275183910585,0.997451786181699,-1.38934851068297e  
-06  
"Ccdc150",28.9429832101995,1.92717864586069,0.427667253449051,4.506257  
21356587,6.5981100487529e-06,0.000122523761648175,17.3584942413823  
"Slc39a10",1298.95818558353,-0.3489158967924,0.130266392741811,-2.6784  
7976326445,0.00739572010494927,0.026853212403408,-1.26215783568184  
"Cps1",15.1101445740761,0.502660519831403,0.584908830672352,0.85938268  
2346573,0.390129420845426,0.534369051467798,0.315001549715772  
"Slc40a1",2676.47524278059,-0.0750931668122025,0.265123329054372,-0.28  
3238623624865,0.776993922674659,0.855777410851861,-0.0116953830654379  
"Wdr75",1166.67654453939,0.371732005585877,0.243646181333793,1.5257042  
1399959,0.127083544580005,0.236145521035066,0.536523424160777  
"Ikzf2",1133.33642104239,-0.570937723421233,0.284126368096814,-2.00944  
997553585,0.0444894347866017,0.106322536162412,-1.27963016504786  
"Lancl1",1897.57559500598,-0.0142933961368302,0.147253806916864,-0.097  
0663946562677,0.922673667985972,0.952320744184557,-0.00069828078120015  
9  
"Acadl",14883.4372190978,-0.224044836929343,0.51677279136248,-0.433546  
116734678,0.664618070503515,0.772651756259624,-0.0577871770922932  
"Kansl1l",3104.04390942643,0.587643704094387,0.254655319083405,2.30760  
427942179,0.0210211562821002,0.0598001904272528,1.65524330775205  
"Rpe",1724.62382577904,-0.589821392090195,0.326713340482148,-1.8053177  
4802879,0.0710249739238724,0.151797099810113,-1.11193749301718  
"Icos",141.459955638074,-1.38925453424088,0.450950522945519,-3.0807249  
654941,0.00206497294883926,0.0102345812294021,-6.36554062557046  
"Ctla4",94.4627069063059,-1.49979913759256,0.619160629713507,-2.422310  
24651315,0.0154221776903153,0.0470876324155602,-4.58300355650048  
"Cd28",118.440150080531,-1.59360522395246,0.478721994281665,-3.3288740  
5005009,0.000871978275052809,0.00530478390233375,-8.34913082103752  
"Raph1",2449.49582707742,-0.160537045898808,0.203522967588369,-0.78879

0807254241,0.430234283258828,0.572841593544606,-0.0894425812489897  
"Carf",574.584333909471,0.257252917985118,0.192511743831136,1.33629727  
135385,0.181452128039753,0.309369848943608,0.301813701369986  
"Ica1l",34.8466205991135,0.889507583826349,0.296263820740187,3.0024171  
7535404,0.00267844846944021,0.0124343781564632,3.90252791468618  
"Wdr12",956.51314384382,0.135069299592168,0.145506361159538,0.92827075  
4046785,0.353267140644784,0.498155978035148,0.0941219665516392  
"Nop58",2505.27421284335,0.30402080606141,0.290520586710778,1.04646906  
266946,0.295344521318766,0.439724150631742,0.249785828852625  
"Sumo1",4447.87862948326,0.118634915117367,0.167653874545628,0.7076180  
93759474,0.479182453515851,0.616584140345282,0.057367157092153  
"Cdk15",112.954641349601,0.0730767947585749,0.367061461637807,0.199085  
990756181,0.842195479636696,0.898991228193709,0.00778136339474699  
"Als2",1709.79658788975,0.499053772408196,0.139588705838385,3.57517300  
136014,0.000349996381818569,0.00260466773003758,2.96959460125305  
"Stradb",1472.41875162313,0.467921735595122,0.231452047223919,2.021678  
96636676,0.0432095282048824,0.104089372490585,1.05867545262564  
"Trak2",4144.03734980061,0.468630108923368,0.143425685098069,3.2674071  
4958368,0.00108537462753938,0.00626484147062252,2.37726775142844  
"Casp8",2207.66055347939,-0.0301634783173013,0.132695122734856,-0.2273  
14144601775,0.820179475173022,0.88465228782008,-0.00369685419057287  
"Cflar",6355.51189851556,0.557047649551261,0.143646621906153,3.8779028  
8528464,0.000105360756595555,0.00103232363422117,3.83022792115386  
"Ndufb3",7004.12825733066,0.422344880228105,0.383320993114247,1.101804  
72192982,0.270546577104136,0.413008380421072,0.373474253780901  
"Clk1",14398.9000671201,0.316484443730432,0.19836648499278,1.595453202  
39934,0.110610926959604,0.212691504325282,0.48989022638779  
"Ppil3",816.551343488192,-0.188947518321441,0.216662311971457,-0.87208  
2996817338,0.383163101296007,0.527942488097629,-0.120693614262356  
"Nif3l1",805.105585119795,0.491608491251997,0.166043260554893,2.960725  
35319476,0.00306915496352968,0.0137628953396613,2.10692537333994  
"Orc2",952.15716555708,-0.212610687880755,0.160304762441376,-1.3262905  
2713583,0.184743483369111,0.31301081323696,-0.246951043580783  
"Sgo2a",90.6409421519123,-0.765917856559751,0.377449576728526,-2.02919  
251678119,0.042438685479818,0.102561909951102,-1.74421605169747  
"Col5a2",2323.43218349,-0.3325547306107,0.179654915700051,-1.851075041  
92052,0.0641587580770779,0.140305906795297,-0.653114275799701  
"Col3a1",18347.3561666712,-2.21392599638112,0.368975850466634,-6.00019  
213610111,1.97084184248356e-09,2.5281233055753e-07,-33.6309049766962  
"Poglut2",1200.0149057152,0.0907914979560417,0.167796267794784,0.54108  
1748415765,0.5884512377703,0.711984004594807,0.0308418567188404  
"Ercc5",1704.93839980739,0.302910158115233,0.176679681945608,1.7144594  
9403784,0.0864443701305653,0.176398987839431,0.525551206321597  
"Tex30",252.788573414004,0.00525901652803786,0.163349440233971,0.03219  
48855196883,0.974316634830588,0.984077077375299,8.44127600224026e-05  
"Ecrg4",93.7656674434028,-0.910777960984426,0.389644590625913,-2.33745  
8245016,0.0194153696274395,0.0561496406104739,-2.62279916996725  
"Khdrbs2",10.2967121343992,1.48350449275788,0.748160533356951,1.982869  
21939264,0.0473820396671162,0.111684599785956,3.25195526741563  
"Slc9a2",1307.06888554607,1.57380583236953,0.277545244714632,5.6704478



3630755,1.4242473053874e-08,1.04398398347532e-06,21.6751879623607  
"Ptp4a1",143.750846699772,-2.61713617292776,0.720849826398626,-3.63062  
607090162,0.000282734558296406,0.00220246041456785,-16.012110643954  
"Slc9a4",291.817572101955,-0.962230247931804,0.323833079673574,-2.9713  
7725676987,0.00296467354598389,0.0134149929913191,-4.14854247635046  
"Il18rap",249.445201858767,-1.29829911555689,0.440591720574646,-2.9467  
1700562955,0.00321166979674375,0.014228842921361,-5.5209964534624  
"Il1rl1",316.333088053327,-1.33029282707484,0.425487785091258,-3.12651  
237870323,0.00176893057275414,0.0091046636252037,-6.25100410410145  
"Il18r1",676.588020978772,-0.980854191255291,0.337416029863243,-2.9069  
5789305813,0.00364962320774115,0.015687908576838,-4.07531676670183  
"Il1r1",1607.48913349035,-1.20600036712238,0.160601978499018,-7.509249  
75142664,5.94671785854245e-14,7.2468190503663e-11,-28.1575438943644  
"Il1r2",32.5788735410139,-0.992576507540981,0.530302881717748,-1.87171  
622436945,0.0612458737191925,0.135701368838274,-1.98247169367286  
"Map4k4",5889.55986518816,-0.862641571672707,0.219435779592144,-3.9311  
8010780222,8.45299150343609e-05,0.000867911681590294,-6.08112326386873  
"Npas2",546.475925953607,-2.16311405361021,0.278306704822956,-7.772410  
85508975,7.70061977357516e-15,1.25122236954307e-11,-54.3034966991639  
"Pdc13",2420.93213255932,-0.19757080118036,0.176755221380538,-1.117765  
00652848,0.26366737063113,0.405605324654762,-0.178282892235308  
"Chst10",105.591541827941,-1.89753782221499,0.353337662448461,-5.37032  
426451787,7.85951904494767e-08,3.81206224722363e-06,-23.6762250317822  
"Rev1",1067.35698769807,0.580091660421375,0.212037768660568,2.73579402  
427117,0.00622299646019658,0.023528405076772,2.1750808644733  
"Eif5b",14316.379456436,0.563295059757835,0.250758673833281,2.24636321  
107818,0.0246807527491278,0.0677209846752735,1.51659262599429  
"Mrpl30",3053.80595076044,0.27022184743978,0.304479041473795,0.8874891  
55679823,0.374815602086505,0.51989433090152,0.176760135421317  
"Mitd1",658.518884928019,-0.0653326204958998,0.163256301835425,-0.4001  
84371208898,0.689020724965465,0.791523366250907,-0.0152744974112206  
"2010300C02Rik",164.053516069699,-1.22473405121837,0.349328252682561,-  
3.5059690758288,0.000454948074176272,0.00320932617593667,-7.0320484938  
4653  
"Stk17b",1307.22173042414,-1.200148285736,0.191016527952641,-6.2829551  
9031505,3.32196836723301e-10,6.54259992164739e-08,-19.8532683331038  
"Asnsd1",1715.65813371014,0.0690519636304661,0.174829079449189,0.39496  
8410564301,0.692866201298795,0.794957349236431,0.0158451341310591  
"Osgepl1",744.58526991477,0.482562947341765,0.222750432550916,2.166383  
88449128,0.030281864395569,0.0791787303184663,1.22380259133632  
"Ormdl1",674.412374222997,-0.260535979312928,0.310155949539424,-0.8400  
16061919235,0.400899380862356,0.54500721026255,-0.158133942183685  
"Pms1",194.661794821545,0.0298779694836666,0.151946146630861,0.1966352  
56280979,0.844112978687335,0.90015942126699,0.00314266631389976  
"Mstn",0.225873622438741,0.455031861125789,4.78471990595967,0.09510104  
45896777,0.924234568375759,NA,NA  
"Inpp1",930.566899057402,-0.157493567914556,0.180038334450157,-0.87477  
7965456891,0.381694728654934,0.526589104883175,-0.101006093545434  
"Gls",12964.5958541039,0.0123750093035973,0.256938612556704,0.04816329  
15366749,0.961586105328162,0.976714205130679,0.000291569977980912

"Stat1",4920.56059405785,-0.99658534875414,0.333865140180654,-2.984993  
7259544,0.00283584140306588,0.0129431731453601,-4.33234267325925  
"Nabp1",5003.87497605796,-1.11913577183885,0.476409317394762,-2.349105  
55057745,0.0188185713539815,0.0548549116848455,-3.24892226525878  
"Tmeff2",73.9432091473511,-2.00175905280825,0.571148293513917,-3.50479  
739769978,0.000456954882925087,0.00321721533076632,-11.4885738200409  
"Mgat4a",1421.9689146497,-1.03178154834957,0.180888620153576,-5.703960  
52263312,1.17055198169331e-08,9.05691370597466e-07,-14.356793730978  
"Unc50",1551.21659815226,-0.129164047108483,0.275765232534439,-0.46838  
4088600989,0.639509944528187,0.753465949815754,-0.0365626542706027  
"Coa5",4390.78995458781,-0.201717183550888,0.320868950821958,-0.628659  
092860672,0.529572264524629,0.661855010172503,-0.0832504496822632  
"Inpp4a",1229.52762584672,-0.324916639696943,0.161341449216206,-2.0138  
4480724193,0.0440258297373125,0.105541314181887,-0.730624711329645  
"Cnga3",1.82829289201341,-0.34294604385684,1.12043290023606,-0.3060835  
18062157,0.759541056758967,0.844280914696217,-0.0580504776826442  
"Tmem131",1909.13464183853,-0.375693746687858,0.186465217210234,-2.014  
81945163142,0.0439235701575358,0.105379816775149,-0.845380115143887  
"Zap70",242.602382652723,-1.33946890113477,0.413030935225402,-3.243023  
19002761,0.00118268584501403,0.00668599843609267,-6.70771162647006  
"Sema4c",1408.10991171146,-1.59904167730705,0.197114303663627,-8.11225  
59225118,4.96885102285887e-16,9.68826572437022e-13,-44.2337954554443  
"Plekhhb2",6883.09633671339,0.593369336515196,0.26227810721502,2.262367  
00735659,0.0236747375814837,0.065560294470071,1.61680388747726  
"Cfc1",0.612388385130176,-1.21229829385891,3.62846742169171,-0.3341075  
31629345,0.738298416910788,NA,NA  
"Prss39",1.34531693879114,1.12692849614752,1.55334487088146,0.72548505  
9546396,0.468154507304665,0.606356818157632,0.563787290412085  
"Ptpn18",1884.81876309553,-0.112863985389332,0.296243358687756,-0.3809  
84018981139,0.703215106894693,0.802909653582756,-0.0247751213326767  
"Imp4",2350.1616212889,-0.405568110833488,0.165589798563616,-2.4492336  
7472832,0.0143160537588772,0.0447330795177223,-1.26011716115519  
"Dst",9610.6544833926,0.103656328720566,0.199684311308003,0.5191010152  
05353,0.603690300426451,0.724800090992299,0.0333627636347076  
"Prim2",256.531880933415,-0.17182025025936,0.208585632520131,-0.823739  
622827458,0.410087520504628,0.553616733005555,-0.101594332782007  
"Zfp142",1157.92058389936,0.0371746446029876,0.203055940359841,0.18307  
5878189573,0.854738482300788,0.907618501682864,0.00360338071768216  
"Col19a1",69.0647411325136,1.97578184217753,0.538010321273038,3.672386  
50273929,0.000240295883508302,0.00194823172382901,12.3305247706058  
"Rhbdd1",879.264809661641,-0.36127942365664,0.205055901500984,-1.76185  
821043003,0.0780932567586726,0.163323213587965,-0.654647035538419  
"Col9a1",0.743435922580991,1.08327665871538,2.33899443675262,0.4631377  
6625282,0.643265621125088,NA,NA  
"Tmsf20",9.04975882041967,2.57690507040089,0.900389804311911,2.861988  
28336377,0.0042099246975496,0.0174352403892995,10.4345632926789  
"Mff",3388.12489907584,0.0696108146417594,0.164047047436844,0.42433445  
6056324,0.671321914040511,0.777744187757687,0.0174972084427748  
"Fam135a",1568.10985707015,0.589711200186867,0.155425552363552,3.79417  
149380618,0.000148137264885633,0.00135097305460246,3.89618071714282

"Sdhaf4",992.917677366208,0.642495178079657,0.271590106114315,2.365679  
61650718,0.0179970110262284,0.0529748974923613,1.88761042657913  
"Smap1",4210.0537900284,0.56212070756573,0.205810559771082,2.731252993  
97156,0.0063094016744657,0.0237629348751656,2.10212248940906  
"B3gat2",2485.64317424366,1.79202581474356,0.702463071186833,2.5510605  
3008008,0.0107395671890839,0.0358623190705187,5.96398402507979  
"Ogfrl1",1746.64722919628,0.217568094270434,0.227170773198499,0.957729  
250145774,0.338199303210045,0.482844696052534,0.15840267399178  
"Agfg1",2276.97725372113,-0.31062594031527,0.146861089882396,-2.115100  
33436367,0.0344213967419646,0.0873208943110625,-0.75735745281697  
"Nhej1",202.882736491839,0.207375814610381,0.171200452769971,1.2113041  
2481453,0.22577886847316,0.361863846560386,0.21079487200321  
"Sphkap",9.06825674433389,-2.00859426357128,0.81401677859577,-2.467509  
65875203,0.0136056550742402,0.0429886667699782,-6.32068211288035  
"Ccl20",64.4667157486098,-0.389262236160433,0.779923517824954,-0.49910  
3088013047,0.617706762221645,0.736255617912247,-0.119183499312573  
"Wnt10a",171.863378637542,0.226863758632683,0.527315394988172,0.430224  
038192118,0.667032677567118,0.774569897397634,0.0579517515759137  
"Cyp27a1",3008.48570731069,0.149535927475345,0.213719797402973,0.69968  
2150612334,0.484125825969999,0.621714111490683,0.0710706759279979  
"Rnf25",2261.41574091253,0.261337731952778,0.164959026394964,1.5842584  
5292669,0.113134916294479,0.216541140464293,0.399840124407456  
"Bcs1l",759.515896421927,0.211498747086156,0.213286393757879,0.9916185  
6206471,0.321383630963888,0.466696807666186,0.161178006302576  
"Plcd4",119.613111897064,1.48836420286566,0.461931500680695,3.22204526  
141307,0.00127279027117971,0.00707181383926476,7.36984115795887  
"Cnot9",1371.55791037931,0.0386378200486071,0.178080242011534,0.216968  
595797981,0.828232818888673,0.890530688358406,0.00447958056535695  
"Vil1",5009.08112462995,1.3849900300123,0.592168709696019,2.3388436560  
9805,0.0193435264066703,0.0560166460533576,3.99168860376315  
"Ctdsp1",7120.10901652042,-0.0323357572512856,0.138438811713996,-0.233  
574362932909,0.815315432656066,0.882334478877059,-0.0040479216058703  
"Slc11a1",966.069924302281,-1.56522283132213,0.399683320891131,-3.9161  
5749146679,8.9971485347965e-05,0.000908821270936982,-10.9618222623722  
"Pnkd",3586.62349231436,0.678583769811861,0.235807193541372,2.87770597  
504188,0.00400578305631327,0.0167967221574185,2.77308110852056  
"Cxcr2",265.761708219578,0.71543312733004,0.367567553383152,1.94639902  
446523,0.0516068266949697,0.119165076610436,1.52190193552997  
"Ppm1f",1339.6156680905,-0.719213528946441,0.241722911221875,-2.975363  
50737676,0.00292641547688595,0.0132765409462539,-3.10826584414166  
"Igfbp5",12871.665921878,0.110904681946089,0.324285829636417,0.3419966  
94923219,0.732353379531653,0.82482822285745,0.021358037960916  
"Xrcc5",1844.78598859018,0.819607708441469,0.149791938590329,5.4716409  
7183521,4.45887448267845e-08,2.47689842345483e-06,10.5799089043512  
"Tmem169",328.321188284715,1.18863680817974,0.595400717404673,1.996364  
42052162,0.0458942706366249,0.108769477193742,2.63701990957249  
"Pecr",12415.4697790762,2.06665514841504,0.654458127261169,3.157811114  
7672,0.00158958517317889,0.00841078200994357,9.87497599845083  
"Atic",1614.40661579406,-0.689093298567366,0.219850616480887,-3.134370  
55395872,0.00172223221006195,0.00893458103779566,-3.25102229520599

"Fn1",6149.5369629977,-1.33901828336265,0.342133605641962,-3.913729201  
93028,9.08815531790747e-05,0.000916240188151809,-9.36674356247064  
"Bard1",118.414154177913,-0.587566419473664,0.310727318487769,-1.89093  
904692127,0.0586324812984207,0.131253285919243,-1.19312784920391  
"Zfand2b",1239.70242287867,0.382314616009369,0.138586850081213,2.75866  
444605192,0.00580380958447277,0.0222410926254029,1.45501819642422  
"Abcb6",1267.18720465701,1.34086754525382,0.305818087442473,4.38452661  
995033,1.1623826882089e-05,0.000191420081543051,11.4792209111396  
"Ankzf1",2052.56525264981,0.289841073008058,0.143811524280875,2.015423  
13425436,0.0438603324739768,0.105269479488122,0.652499424639604  
"Glb1l",3954.82602265569,1.15667082933124,0.329674062949941,3.50852845  
074099,0.000450593037113473,0.0031866750227198,6.64944291284494  
"Stk16",3781.64820628239,0.194326043363437,0.140168319039545,1.3863763  
5590546,0.165632012349888,0.288450605287435,0.241592242808004  
"Tuba4a",4926.72497890198,1.06452099128106,0.305274646836448,3.4870926  
9607765,0.000488302079169588,0.00339789933606304,6.0513737709306  
"Dnab2",3362.00291427785,-0.0365114467331301,0.148843312403711,-0.245  
301224109413,0.806223203999422,0.876804589613832,-0.00480020109776988  
"Ptprn",42.8510193609226,-0.801384242366085,0.604272143885872,-1.32619  
75592862,0.184774267543733,0.313035769273413,-0.930757964344689  
"Slc23a3",308.691870717638,0.957278867387579,0.304170037530398,3.14718  
331614734,0.00164851572862133,0.00865681650327463,4.54650813434835  
"Speg",1975.94249883977,-0.720149205113956,0.282058345943819,-2.553192  
32871555,0.0106740536799496,0.035686333788007,-2.40024827756739  
"Des",2874.65822287309,-1.21085111928116,0.224622613169385,-5.39060205  
113041,7.02220238743794e-08,3.50871259537519e-06,-15.2086065379795  
"Dnpep",2137.47115844289,-0.593338520617024,0.283709528685705,-2.09135  
915654891,0.0364958805729597,0.0913709141514598,-1.41975707134591  
"Obsl1",991.319747975288,-0.964825141409281,0.299336816460439,-3.22320  
9068694,0.00126762995267697,0.00705372397753869,-4.77993630827343  
"Stk11ip",1847.24981029838,0.09829225168533,0.145837681366602,0.673983  
9166686,0.500321538923844,0.63558156308292,0.0445475082852834  
"Trip12",7139.33395722923,0.041165852271836,0.0930095884834748,0.44259  
7940094639,0.658056574992835,0.76718241266631,0.0109102138092269  
"Slc16a14",490.048340655895,1.99323592437324,0.64757758676623,3.077987  
81969393,0.00208403433032829,0.0103028654596199,9.11971854501334  
"Sp100",2928.80351858627,-0.926777306641144,0.226557009451036,-4.09070  
241916942,4.3006866540081e-05,0.000516665362784042,-7.01395738467407  
"Itm2c",5848.260374861,-0.960581034859791,0.358213800637722,-2.6815857  
824285,0.00732741254317849,0.026679717977011,-3.48100314754759  
"4933407L21Rik",8.43704136983281,-2.24203270135504,1.33518415545319,-1  
.67919360950929,0.093114317027885,0.186841921725811,-3.76099272289161  
"Spata3",0.132379703865316,-0.0614346238760028,4.78471990596043,-0.012  
8397534408383,0.989755640445417,NA,NA  
"2810459M11Rik",41.6598966547369,-0.157068565680342,0.607699788357169,  
-0.258464078299179,0.796048768635389,0.869397798176934,-0.021982451477  
3437  
"Htr2b",32.2890123953117,-1.88583450427129,0.820086607033829,-2.299555  
30074094,0.0214734269566338,0.0608117471024614,-5.28028437387313  
"Psmid1",8430.60357173033,0.362117092255782,0.177385038774037,2.0414184

5760209,0.0412092513620266,0.100120356242196,0.833369850086293  
"Ncl",17367.8020835318,0.735129171041886,0.232202235015331,3.165900496  
14875,0.00154603669963692,0.00824073908406798,3.52763880323404  
"Epha4",445.47567738068,0.0354873503824214,0.291987614233827,0.1215371  
77100953,0.903265569876381,0.940839535899979,0.00216411369755406  
"Nmur1",1.14635837263623,-0.23191010782201,1.79272589647772,-0.1293617  
21319282,0.897071435089192,NA,NA  
"Ptma",71350.1606271057,-0.113953812114063,0.157777888833184,-0.722241  
962779362,0.470145728094689,0.608129201342044,-0.0566769702091456  
"Pde6d",1229.68462999597,0.0414809462705494,0.113194745737393,0.366456  
464037504,0.714024493203799,0.810363769993461,0.00872228291854281  
"Cops7b",930.929606350338,-0.0628513210712863,0.0940410147236816,-0.66  
8339460776351,0.503916929814574,0.638799317178634,-0.0281677580060196  
"Nppc",2.34731496817051,1.63222855038778,1.12714691216901,1.4481063051  
9036,0.147587322460338,0.26467501307899,2.1696439976133  
"Farsb",1853.94442337003,0.242214114888123,0.218407121860642,1.1090028  
2383041,0.267428963800692,0.409563734807471,0.21621551721737  
"Ecel1",3.85835271716793,-2.68903957861271,1.64072285186733,-1.6389358  
9679224,0.101226610744301,0.199232998461033,-4.33817455826731  
"Mrpl44",1493.85754566672,0.16211509598841,0.30204866729482,0.53671846  
1433152,0.591462101802162,0.714562740004867,0.0544843670550733  
"Serpine2",4934.4425167839,-1.18852847009326,0.29976422965389,-3.96487  
756883314,7.34336276069987e-05,0.000776698269304374,-8.51040891787089  
"Chrng",0.113058343341289,2.23400583696369,4.75316341366045,0.47000400  
4184502,0.638352156775581,NA,NA  
"Eif4e2",2718.12282977223,0.110310118402243,0.128099425804356,0.861128  
906000857,0.389167050431655,0.533350611465271,0.0693383220459812  
"Efhd1",3150.71348528704,0.992872265051573,0.389521576830403,2.5489531  
8798699,0.010804680235562,0.0360119068774339,3.30021373015833  
"Snorc",0.500716019844024,0,3.56693976570851,0,1,NA,NA  
"Ngef",1556.4151647116,1.56432020190152,0.390783115568435,4.0030393831  
7819,6.25338874680488e-05,0.000688084502173824,11.3907522686817  
"Ndufa10",9287.88726186263,0.794884741049489,0.339073987698432,2.34428  
11005498,0.0190637973601477,0.0554123316827907,2.29956428883528  
"Rnpepl1",5077.08141836295,0.45580571763689,0.168923885889389,2.698290  
50662114,0.00696965897872094,0.0256695146896677,1.66936619297591  
"Capn10",995.776435956069,0.458544196271271,0.13862216065224,3.3078707  
9146469,0.000940081718092635,0.00560370325263534,2.37724333469809  
"Gpr35",213.112368893313,-1.20302474999813,0.418686290742143,-2.873332  
07845355,0.00406166935037297,0.0169872220063432,-4.90267938219577  
"Agxt",1.69568554714864,-0.0422076275508129,1.15255910930432,-0.036620  
7921225744,0.970787364932118,0.982120689121903,-0.000761471051595087  
"Mterf4",675.204301070489,0.23150297322985,0.19603272367278,1.18094045  
163744,0.237626380139758,0.375762612811882,0.226594574009048  
"Pask",173.990536854622,0.178677022475936,0.289921957750229,0.61629351  
5201315,0.537700818033321,0.66903400732284,0.0718139380353556  
"Ppp1r7",1749.40090363844,-0.621962977142445,0.333450363228189,-1.8652  
3406698711,0.062148602348635,0.137093952776749,-1.23589566683149  
"Sept2",748.307535600169,-0.843411438906071,0.237185550510169,-3.55591  
408115694,0.000376667170342401,0.00275478487897079,-4.97141781536791

"Stk25",6793.65887036766,0.00733095926665399,0.114631437448321,0.06395  
2432507522,0.949008102585916,0.968428323871889,0.00023518308374079  
"Bok",2661.64405125006,-0.810848060945381,0.321849066088974,-2.5193425  
9371511,0.0117574196526621,0.0384512191190215,-2.64203884230846  
"Thap4",2585.53409522101,1.34160686475084,0.286276967389846,4.68639470  
713642,2.78059768141628e-06,6.21031999911279e-05,12.9957607122809  
"Atg4b",1921.52006942784,-0.210951418590065,0.165531101037397,-1.27439  
144226079,0.202524723664198,0.334567211512715,-0.2309743974  
"Dtymk",2167.15863080471,0.0133178978226204,0.090330363942163,0.147435  
449625196,0.882788326491544,0.927053739965106,0.00100874743239662  
"Ing5",1084.43526446457,-0.236892596739948,0.106479460378739,-2.224772  
7016773,0.0260965008535967,0.0707986049316027,-0.6272716931224  
"Pdcd1",127.363726770923,-1.78159516419701,0.564951838217474,-3.153534  
59122864,0.0016130611021567,0.00851650835901745,-8.49063508561712  
"Inpp5d",1481.43999642009,-1.10865086303225,0.332254822086159,-3.33674  
875227172,0.000847645371378115,0.00519239379551696,-5.83212488942517  
"Atg16l1",2130.18252731166,-0.0430676398394753,0.106285577848325,-0.40  
5206808970215,0.685325500417641,0.788665566859083,-0.0102248140296416  
"Spp2",3822.0626924853,2.00594939441832,1.14096312593039,1.75811938951  
364,0.0787271972950071,0.16426141175581,3.62333866034031  
"Iqca",3.84431119995601,1.25453681854345,0.897464574246415,1.397867787  
25708,0.162152773546912,0.284219235762109,1.57821908743779  
"Mlph",839.803594309002,-0.330408341496061,0.186360354230943,-1.772954  
0323078,0.0762363241842508,0.160109419317592,-0.605274322725516  
"Rab17",1592.64693829548,1.53554617066036,0.572947468218956,2.68008195  
486701,0.00736041371132976,0.0267549117344347,5.56026981588352  
"Lrrfip1",4208.1240731242,-0.265860122314014,0.195004325370616,-1.3633  
5500153001,0.172770655509824,0.298208440644914,-0.321680797317418  
"Scly",3827.12996729702,0.770686481271577,0.20215922306633,3.812274649  
56524,0.000137693750168106,0.00127662992904315,5.13549367623568  
"Klhl30",52.2816420387626,-0.86073450425499,0.281801519054174,-3.05439  
980289646,0.00225511330035967,0.0109678971028254,-3.88430779588655  
"Ilkap",3630.7891329852,0.265912162372488,0.140244140730223,1.89606611  
005592,0.0579513032267552,0.130210474882058,0.542089358593607  
"Asb1",636.675324674351,-0.287229887382274,0.151913590358029,-1.890745  
17102343,0.0586583694387991,0.131296164311526,-0.583162757418739  
"Cdh7",0.220934797106265,0,4.78471990595636,0,1,NA,NA  
"Hdac4",1080.69754604335,-0.15076028507889,0.206809405750325,-0.728981  
762371574,0.466012818529989,0.604786870054429,-0.075814206112596  
"Serpnb8",476.681067775957,0.143315248389807,0.158000898679529,0.9070  
53374933593,0.364378572425786,0.50936717845985,0.096678481687093  
"Cln8",1168.60533565905,-0.324458334650866,0.173723123836732,-1.867674  
99619566,0.0618073858825958,0.136579786133905,-0.645946681960406  
"Relch",1995.173571836,-0.0106512255059899,0.108041159019804,-0.098584  
8874875317,0.921467869599741,0.951630324229648,-0.000528073216225052  
"Tnfrsf11a",467.935888507396,-0.753258793437099,0.248695054464877,-3.0  
288450852306,0.00245490530130077,0.0116631928764041,-3.35299390157851  
"Htr4",50.4987685950815,-1.91982155771448,0.625062782087738,-3.0714059  
6549708,0.00213053260431714,0.0104875346425084,-8.74971711279948  
"Serpnb11",0.370843636912122,0.40318925314568,3.12692061325656,0.1289

41314159484,0.897404085543737,NA,NA  
"Gin1",741.609322904377,0.401106377529156,0.16388535822181,2.447481470  
46962,0.0143858522041398,0.0448936213630469,1.24481742092094  
"Pam",6362.20922182882,0.198865138928653,0.238125789316966,0.835126424  
14361,0.403646530236072,0.547499133672552,0.119795245971461  
"Ccdc93",1013.68085365015,-0.0116034610341815,0.113956313655336,-0.101  
823766160746,0.918896561024733,0.950333906903954,-0.000591102063786674  
"Actr3",10353.8638843529,-0.730566011936503,0.201733498854119,-3.62144  
123849655,0.00029296635368031,0.0022694707842903,-4.44783828356506  
"Slc35f5",2158.02394663375,-0.56689400908337,0.202471631793787,-2.7998  
6882142947,0.00511233771752556,0.0202194897788058,-2.21151492360161  
"Gpr39",311.031495208827,-1.23833736602055,0.364534837190482,-3.397034  
35634461,0.000681204137862837,0.00437163075242599,-6.7274153130674  
"Lypd1",57.4328971701152,-1.31320923234364,0.590316027971397,-2.224586  
78084084,0.0261089908701587,0.0708226355017186,-3.47682205928021  
"Tmem163",72.6525775687063,0.8719350188452,0.551175229838189,1.5819561  
0332703,0.113659591858643,0.217333272222541,1.33085472393422  
"Acmsd",3308.30356241521,1.52737787066118,1.00931585292912,1.513280373  
26333,0.130208455935233,0.240348809412589,2.17752770296151  
"Cnt2",4772.3188583718,-0.0372239543815091,0.175686763109964,-0.21187  
6829663088,0.832203127464531,0.892673419561928,-0.00422620217661538  
"Ubxn4",7228.05546272367,0.528719270997724,0.278017475804416,1.9017483  
32431,0.0572040638878121,0.128943911871047,1.0830167964536  
"Lct",17.3183709526539,-0.703166200466634,0.548540724555024,-1.2818851  
3448485,0.199882943438766,0.331361807179863,-0.776678308348289  
"Mcm6",1408.69817875128,-0.257348229636913,0.297805438628023,-0.864148  
857799592,0.387506122401573,0.531859381570172,-0.162483533134283  
"Dars",3085.64225144297,0.017683609539364,0.156183259703553,0.11322346  
3083872,0.90985339442398,0.944789981598698,0.00100429847934781  
"Rgs18",60.3052469151402,-1.4792006539153,0.406250684286537,-3.6411031  
6887981,0.000271472315594081,0.00213692660858029,-9.09469754793145  
"Rgs1",272.500227388108,-0.986984359834957,0.556685567173017,-1.772965  
59860012,0.0762344074737666,0.160109419317592,-1.80805450381434  
"Rgs2",3116.66278796197,-0.777723900893207,0.348984946322164,-2.228531  
37102153,0.0258451017808823,0.0702828165304942,-2.06503423173941  
"Cdc73",1695.61317194677,-0.538495921656307,0.234692093078552,-2.29447  
832942575,0.0217630384308393,0.0614890194644987,-1.50180948024065  
"Cfh",27212.4952584397,-1.18976276511711,0.403992518507796,-2.94501187  
673393,0.00322942266172108,0.0142809391158345,-5.05509920560145  
"F13b",2220.77214054876,1.78873279904243,1.00642246048159,1.7773180441  
4072,0.0755159264734329,0.15905904011872,3.28854916189441  
"Tsn",4978.51953465573,-0.358766695924775,0.190841148081999,-1.8799231  
6924557,0.0601185497218398,0.133781269399273,-0.721676835286304  
"Nifk",1136.79269140798,-0.287174706650113,0.19987083210844,-1.4368014  
7633701,0.150774410803639,0.269163107658795,-0.376898921533998  
"Tfcp2l1",12112.9489816524,0.991501057922562,0.457559133688725,2.16693  
534216951,0.0302397846361779,0.0791111392507979,2.51534060954532  
"Epb41l5",3163.59938252636,0.710994480791648,0.193102775022593,3.68194  
85411769,0.000231458135741431,0.00189957556137266,4.45518015338448  
"Ptgn4",1203.76970740676,-0.435334652243933,0.281799419498386,-1.54483

871194216,0.122385280961593,0.229957425863847,-0.639881467390508  
"Dbi",22038.7906169097,-0.241531615333135,0.551361043815041,-0.4380643  
4647958,0.661339638940148,0.770031274500517,-0.0631180437670541  
"Sctr",139.843823788953,-1.13081260701846,0.692777925840927,-1.6322872  
9559451,0.10261897829536,0.201249995263966,-1.81292712399879  
"3110009E18Rik",91.1313199868124,0.500205946284076,0.217076400961344,2  
.30428523814134,0.0212066370617667,0.0601873376172237,1.40572541314767  
"Steap3",958.446946211458,-0.99105519366482,0.238245916601532,-4.15979  
928555235,3.18527387304189e-05,0.000407926180399811,-7.7346152661303  
"Marco",6.28670127324505,-1.75337378957397,0.811142927223395,-2.161608  
92331996,0.0306483330714046,0.0799332795915258,-4.43000933733094  
"Nek7",4312.67930986385,-0.0210744289372936,0.164123434556634,-0.12840  
597075137,0.897827706298126,0.937244063465086,-0.0013658665603022  
"Atp6v1g3",2746.66618129187,1.11106066620617,0.493298800242215,2.25230  
76594969,0.0243028364658566,0.0668911215995584,3.00507359796468  
"Ptprc",3902.05420514404,-1.21873978761484,0.388068028282368,-3.140531  
29552858,0.00168641688363118,0.00882258019775709,-5.7651765528012  
"Nr5a2",58.0829681557657,-0.557304238787982,0.313724084760636,-1.77641  
521916684,0.0756645044499074,0.159268758260207,-1.02385828150907  
"Cd55",955.819563928164,-0.54871183158632,0.277143361768443,-1.9798844  
4711433,0.047716514416811,0.112337188855226,-1.19962141505232  
"Cd55b",2.4290851871443,-0.271241668586209,1.17493117202528,-0.2308574  
9620436,0.81742551192647,0.883000699808439,-0.0337504071131686  
"Ddx59",321.059343967181,0.0233109047639696,0.24305266800166,0.0959088  
61876021,0.923592956269935,0.953017329665072,0.00112177181527517  
"C4bp",69.7588666894706,-1.0595252440308,0.454505954596303,-2.33115811  
424711,0.0197450238634636,0.0568752364145094,-3.03754788404928  
"Cacna1s",75.7098151684006,-1.16661358584395,0.655357728664528,-1.7801  
172318838,0.0750567770500458,0.158314262107507,-2.15027092035291  
"Pfkfb2",892.47049451512,0.143190368437702,0.118293483526657,1.2104670  
8718688,0.226099712693488,0.362212817196421,0.145413162226884  
"Tmem9",2519.34121696011,0.307243354723884,0.235956318712831,1.3021196  
3129418,0.192875493244746,0.322999773880104,0.347216838400269  
"Pkp1",155.053300874434,-1.88573648042536,0.590503275858229,-3.1934394  
9055093,0.00140588798200791,0.00764630512501821,-9.19019847262163  
"Tnnt2",157.538311873455,-1.61988505203351,0.56273654881237,-2.8785851  
1314433,0.00399463472315822,0.0167716166735872,-6.62219911919802  
"Fcamr",121.376689969383,1.1171088214632,0.662019139801797,1.687426774  
09245,0.091521319173881,0.184499863653053,1.88803294125553  
"Pigr",4736.46364022796,1.02351646319438,0.479282775948478,2.135516890  
14671,0.0327188120407146,0.0840404949505802,2.53469401201195  
"Tnni1",11.1875735546415,-0.980025596901491,0.694443705852418,-1.41123  
836049248,0.158174342669979,0.279052056947091,-1.25086246269776  
"Il24",2.01855924948381,-0.806025759507687,1.26294816340915,-0.6382096  
92891858,0.523337188391356,0.656418687632979,-0.339301742561233  
"Csrp1",5569.71520399625,-1.36508910289472,0.236753373080195,-5.765869  
71131485,8.12378024192897e-09,6.81317024540035e-07,-19.3832252149554  
"Gpr37l1",27.9319823696317,-1.18336088024663,0.398512201115745,-2.9694  
4705063857,0.00298336222163699,0.0134839120531938,-5.09585726211152  
"Srgap2",2300.98423011992,-0.539790093977503,0.141965826964349,-3.8022



5372203872,0.000143385773389655,0.001317500381504,-3.57989815278349  
"Arl8a",3440.84798430198,0.248324776131207,0.134349210897879,1.8483530  
6788637,0.0645512833780999,0.141037754740721,0.486400607752902  
"Eif2d",1446.19208078658,0.382331590736396,0.106899327332992,3.5765574  
9830334,0.000348148766887273,0.00259487945595109,2.27648457507064  
"Ube2t",76.1041626656727,-0.509151248799051,0.32644457647974,-1.559686  
65275299,0.11883394781583,0.224801039537503,-0.759928368990799  
"Rassf5",717.547935176884,-1.11894409873945,0.275877129437186,-4.05595  
092649468,4.99307428165052e-05,0.000578117353584453,-8.34254919855257  
"Rab29",850.564444299394,-0.0113496128995073,0.169575857406609,-0.0669  
294147945435,0.946637895914442,0.96717384691573,-0.000378816257230382  
"Nucks1",7695.907256117,0.432833298099721,0.2517557003171,1.7192591768  
7085,0.085567189753616,0.175048690149617,0.754294742584907  
"Slc45a3",1254.7436430328,0.735350959252108,0.289836000219889,2.537127  
75050105,0.0111766160498326,0.0369684202356855,2.42496041512627  
"Elk4",3414.42109359141,-0.168570047324593,0.0940529244680206,-1.79228  
926987708,0.0730866412063737,0.155301147585209,-0.313943028733742  
"Cdk18",1981.40125738493,0.310351582003952,0.198979424031462,1.5597169  
582463,0.11882678285367,0.224801039537503,0.463212006417094  
"Rbbp5",1308.53824179328,-0.0414691175409543,0.091531414640661,-0.4530  
5885092846,0.650506364830712,0.761913443952017,-0.0112763786650819  
"Nfasc",111.906818631399,-1.60600363743984,0.683392520094531,-2.350045  
67685009,0.0187711074156167,0.0547492972909042,-4.66542570358006  
"Lrrn2",69.8719553718577,-1.53989005462183,0.443038103533463,-3.475750  
82671307,0.000509425362773307,0.00351353934324511,-8.70212102429682  
"Pik3c2b",478.230343870364,-0.841006732610299,0.234467474982488,-3.586  
88015330533,0.000334658039832105,0.0025213147065867,-5.03172209165478  
"Chit1",1.12132588271889,-1.28363812595777,1.65774914883528,-0.7743259  
14665463,0.438738082486388,NA,NA  
"Syt2",179.100966303977,0.168152127209047,0.709260703234429,0.23708084  
5508888,0.812594071874129,0.88066028644332,0.0213693318283144  
"Klhl12",1175.23773964954,0.0559523357827739,0.138898084205057,0.40283  
0147751864,0.687073181193982,0.789937666544033,0.0131936301440893  
"Cyb5r1",1867.66261244908,-0.222720759679503,0.0931801923511734,-2.390  
21571065364,0.0168384796860761,0.0503707697022263,-0.665566298954956  
"Adipor1",5854.98083260741,0.0879605776768431,0.195309259835428,0.4503  
65629110267,0.652446823964113,0.763269225034636,0.023762062696196  
"Ppfia4",662.608030621695,-1.05455357292611,0.29037552320956,-3.631688  
92911492,0.000281572405886095,0.00219516144340947,-6.45544936409417  
"Atp2b4",1878.73368344393,0.140099760960827,0.302050740822664,0.463828  
562642328,0.642770577728004,0.7559862905381,0.0391903915414277  
"Tor1aip1",3710.28772307369,-0.0896090214219726,0.145266694660537,-0.6  
16858679350924,0.537327943565175,0.668761664983645,-0.0360521769675144  
"Lhx4",1.33808274606045,1.59472444967812,1.76029392501733,0.9059421423  
96714,0.364966476982853,0.509933096969665,1.07400823567064  
"Xpr1",2896.75357425012,0.648116818394663,0.156785327420439,4.13378489  
593391,3.56837471663781e-05,0.000447723103121004,4.99784628818119  
"Stx6",2067.0011251021,-0.43527696832055,0.196895032777411,-2.21070568  
505722,0.0270562245993718,0.072780934665807,-1.14055678180838  
"Mr1",770.963725164124,-1.61584522522974,0.395048830786051,-4.09024176

078335,4.30923770974447e-05,0.000517373872318951,-12.2266884354431  
"Glul",34888.7143166233,-0.445523877877787,0.479697202990071,-0.928760  
632959139,0.353013150315564,0.497977890670877,-0.310619069084295  
"Rgs16",532.647570397313,-1.18547345587824,0.413495492503416,-2.866956  
1757519,0.0041444039766589,0.0172297630569073,-4.81434638137676  
"Lamc1",3559.96938328298,-0.767165557506368,0.182944280259032,-4.19343  
833226234,2.74757794649054e-05,0.000364189495585809,-6.07429124833247  
"Lamc2",1747.37324378855,-0.797284473554208,0.292716441213396,-2.72374  
339565358,0.00645466350379593,0.0241978521432442,-2.96708731501003  
"Ncf2",1317.60702386375,-0.905524237092278,0.347235183289457,-2.607812  
45873184,0.00911228635775146,0.0314629643002369,-3.13215777287059  
"Rgl1",5149.42461583885,0.892842596178323,0.207042026580044,4.31237372  
878565,1.61511125352714e-05,0.000243553280906977,7.42860649285514  
"Fam129a",1410.8782407769,-1.07944142706782,0.21411421283383,-5.041428  
18349732,4.62070265317154e-07,1.48916463357915e-05,-11.9976785866675  
"Rnf2",1495.87901179167,-0.12843528952759,0.104042644826928,-1.2344485  
258063,0.217035816329029,0.352354682565698,-0.133973032591997  
"Coq8a",4759.22821904711,-0.157556659663105,0.559793806370629,-0.28145  
4810449956,0.778361583696059,0.856799760566011,-0.0243505454995806  
"Cdc42bpa",2961.1120971979,-0.0255483748297036,0.154759066156662,-0.16  
5084834537843,0.868877209517806,0.917816026877906,-0.00219098557374685  
"Ahctf1",2407.70626739618,0.143131498989493,0.0941915516912177,1.51957  
894757602,0.128616832305105,0.23833596239165,0.205261160423522  
"Tfb2m",1751.46563062284,0.0298581649328354,0.272332635398104,0.109638  
585508446,0.912696008295832,0.946353538447837,0.00164635116135028  
"Kif26b",502.227834408802,-0.446150145778065,0.329717605105624,-1.3531  
28067381,0.176014720399032,0.302385494236688,-0.533619043910036  
"Efcab2",739.23565366353,0.979986527567546,0.174024055350511,5.6313279  
5402167,1.78827309459191e-08,1.26332423182439e-06,13.3099457718876  
"Parp1",2210.65651238355,-0.263776210657083,0.157902408046721,-1.67050  
150735532,0.0948201814468312,0.189601972098892,-0.438614544742436  
"Mixl1",0.517852816592561,-0.798681168239809,2.63868532637244,-0.30268  
1475603536,0.762132616295052,NA,NA  
"Acdb3",2602.3913481574,0.0645332559029303,0.166280497366425,0.3880987  
66391835,0.697942944823012,0.798479817999125,0.0145229244258819  
"Cox20",2297.80898707459,0.876445976205393,0.20063434693773,4.36837455  
591495,1.25174682137419e-05,0.00020170710349714,7.45741052746794  
"Desi2",992.83690971471,-0.102868181089393,0.141000577733534,-0.729558  
578715868,0.465660048958512,0.604449745995145,-0.0517876223092163  
"Sdccag8",742.454613180162,0.96508849221518,0.200876320322348,4.804391  
53139849,1.5522282122318e-06,3.89014725990946e-05,9.79997029850941  
"Capn2",7049.99777014202,-0.599001158597082,0.196900159388745,-3.04215  
679894123,0.00234889503224364,0.0113027530450855,-2.68514785508023  
"Trp53bp2",3615.87005258357,0.960809109646745,0.239761672727655,4.0073  
5071087917,6.14036499525979e-05,0.000677899121608382,7.01055526481373  
"Srp9",4040.97581115213,0.428253442176341,0.226473975144951,1.89096094  
552252,0.058629557786903,0.131253285919243,0.869622720841918  
"Cnih3",1.00644585780926,-1.65026697090985,1.96876465815593,-0.8382246  
01438955,0.401904572633354,NA,NA  
"Nvl",1817.72234624971,0.108072402291709,0.132559302530126,0.815275882

031353,0.414914410849331,0.558277633202695,0.0629952833133798  
"Tmem63a",1823.07163199266,-0.621816730683505,0.132534941649099,-4.691  
71920209415,2.70918793972891e-06,6.07868198490612e-05,-6.0366823656055  
1  
"Pycr2",996.649106839888,-0.493081940520473,0.138771229738215,-3.55320  
00505483,0.000380574930536408,0.00278023604181299,-2.90189542568886  
"Wdr64",0.761566859870984,-0.525980123356306,2.11453365531419,-0.24874  
521246537,0.803557873262815,NA,NA  
"Opn3",107.222400486405,-1.05348667527308,0.431933870625953,-2.4389999  
1854396,0.0147279715767633,0.0456253558633192,-3.25242063425159  
"Fh1",5856.41808548207,0.877211786602318,0.318765156874157,2.751906121  
74914,0.00592495031696305,0.0226171891688538,3.32379500336078  
"Rgs7",129.310571369846,-2.74347518843287,1.15574073657809,-2.37378081  
5718,0.0176069988339796,0.0521179995847782,-8.10489760678831  
"Spta1",4.62497493557629,0.174101263194063,0.624982994489257,0.2785696  
0065984,0.780575144682676,0.858170519933624,0.026629216156745  
"Ifi202b",2.43579839124074,-0.598895918381607,1.07549974773953,-0.5568  
53611207587,0.577627451269881,0.702769252768011,-0.211246564910688  
"Ifi211",968.078278021842,-1.13666532475961,0.349639350699165,-3.25096  
509442271,0.0011501397751221,0.00654565829986303,-5.71623684060938  
"Apcs",27.4187416530533,1.34348175768953,0.724423388007783,1.854553262  
53919,0.0636600475317683,0.139543647538025,2.64582320349159  
"Dusp23",1192.47117814898,0.402669709990351,0.183345850200266,2.196230  
29128023,0.0280754642875178,0.0747505379201133,1.0443637050081  
"Cfap45",77.2930469353887,-1.08314141192204,0.311099552444421,-3.48165  
532033527,0.000498324684552361,0.00345186513418501,-6.14015598481715  
"Tagln2",7226.83870954288,-0.634602777506493,0.259723373264761,-2.4433  
7954466494,0.0145504259554549,0.0452695396967385,-1.96417231068179  
"Slamf9",1078.76532643134,-0.546714768124043,0.408238266701858,-1.3392  
0509838759,0.180503913137554,0.308211340603908,-0.643466640371043  
"Copa",10068.8722378194,-0.0818759800713071,0.0968741523505538,-0.8451  
78802442848,0.398011015693268,0.54245902306636,-0.0500788479672089  
"Dcaf8",9243.81157935066,0.0924582267090613,0.158679446310855,0.582672  
985434639,0.560113462340241,0.688466842649681,0.0345135577004572  
"Vangl2",609.617014957821,-0.583980954552831,0.298882200765448,-1.9538  
8334620542,0.0507150145192779,0.11771920870201,-1.24939985042226  
"Uck2",1021.29400706778,-0.617882231958182,0.145003784981998,-4.261145  
54206217,2.03381725131536e-05,0.000291607969668831,-5.02962329685523  
"Tada1",1004.67068132461,-0.194993773058643,0.129473315595881,-1.50605  
37544838,0.132053374928084,0.242880549414941,-0.275952364647976  
"Dusp27",6.95760800756864,0.408303073017779,0.555803413771549,0.734617  
785535235,0.462572303142832,0.601895504436738,0.207283804711454  
"Pou2f1",1300.82178278856,0.139327984274873,0.401520238070431,0.347001  
149791193,0.728590454972799,0.821808237234105,0.0273428660090741  
"Mpzl1",2079.9545658423,-0.584056342544098,0.189233059175718,-3.086439  
25690465,0.00202569330225405,0.0100915434173577,-2.68435652847021  
"Adcy10",37.8569698752997,-0.671862017937239,0.775798520848929,-0.8660  
2642294554,0.386475671886458,0.530818727137374,-0.425513527004675  
"Mpc2",11209.2045719687,0.82399022639057,0.417715009661566,1.972613402  
27676,0.048539624887455,0.113876261106437,1.79023647299944

"Dcaf6",2171.45735890054,-0.031436877944945,0.191623076195564,-0.16405  
5804598719,0.869687213156731,0.918321253960533,-0.00267867348749954  
"Tbx19",0.349997099048342,-0.292270863735201,3.88789699865886,-0.07517  
45387894846,0.94007584212201,NA,NA  
"Xcl1",92.6053698602858,-1.08151513803374,0.38097170071148,-2.83883326  
770458,0.00452788091924425,0.0183964622136746,-4.32129853699407  
"Dpt",1502.28908539464,-2.15409848821432,0.43393978592565,-4.964049294  
57977,6.90384084336217e-07,2.03956195096781e-05,-23.2646738348008  
"Nme7",827.151392714505,1.03913031087802,0.211867227562407,4.904629766  
63975,9.36037232725381e-07,2.64122343902742e-05,10.9541825733034  
"Atp1b1",58725.9546113048,1.74551685786069,0.568525208273946,3.0702541  
1091289,0.00213876715792853,0.0105174481829232,7.95033996552332  
"Blzf1",1054.2042121108,-0.038459303067727,0.154479151642001,-0.248961  
122966643,0.803390854080187,0.874672783117734,-0.00514990931160253  
"Ccdc181",1361.7768282018,0.921471583514839,0.17008020327189,5.4178650  
1772799,6.0314923218195e-08,3.13605432775564e-06,11.6773902296934  
"F5",134.337499143744,1.25343625858456,0.326154287747003,3.84307766500  
02,0.000121500998142494,0.00115788194613018,8.47468666810865  
"Selp",105.749241657992,-1.45073076333964,0.466124032623971,-3.1123277  
535659,0.00185618296557267,0.00942741741670641,-6.76640135608705  
"Sell",123.659211921977,-1.47756324649002,0.508278162434399,-2.9069973  
0126754,0.00364916345965212,0.015687908576838,-6.13907584426677  
"Sele",44.5731232790272,-2.1892070946041,0.708320498424538,-3.09070131  
313915,0.00199684391035394,0.00997552205075101,-10.0870365422985  
"Scyl3",1336.65301141307,0.613240802097118,0.243134135506842,2.5222324  
3280399,0.011661262701158,0.0382008232774158,2.00216879819239  
"Kifap3",1694.60758046302,-0.11040628518508,0.0950255587777228,-1.1618  
5883677185,0.245292809925318,0.384432055937936,-0.105547107302862  
"Prrx1",992.809143909952,-1.66969957817135,0.299330174875616,-5.578119  
80988948,2.43132180257498e-08,1.58548202363234e-06,-22.2982068553044  
"Astn1",38.6378496844398,0.473400088500272,0.43251856132353,1.09451970  
581711,0.273727109586989,0.416670528196218,0.414442590446653  
"Sec16b",367.237213588168,-0.929723143178496,0.252854970161314,-3.6769  
0278180161,0.000236082961935858,0.00192519681799471,-5.81330506807663  
"Tex35",2.01894396557128,-0.573394079413245,1.11024941458098,-0.516455  
196357525,0.605536523464556,0.726479887676096,-0.183224913064162  
"Ralgps2",953.904398025057,1.05134459899609,0.287356604367787,3.658675  
60729689,0.000253521997139819,0.00202672074630266,6.5197413078099  
"Abl2",1373.26929231877,0.0104124734133397,0.128253307742538,0.0811867  
825993396,0.935293410773421,0.959685105942958,0.000428473936648796  
"Soat1",1707.12242863956,-0.293219263674646,0.35002467452254,-0.837710  
267353633,0.402193445579657,0.546021988714117,-0.177425812861063  
"Axdnd1",38.009867594409,0.761818248526446,0.324815156853637,2.3453900  
8556711,0.0190071818841252,0.055264245806244,2.20594311156875  
"Nphs2",4990.69838722391,-0.545311924748516,0.538181986351402,-1.01324  
819220623,0.310941626684609,0.456141189673276,-0.428044171782126  
"Smyd2",1116.4097166461,-0.0321504029017083,0.133239874994395,-0.24129  
7155998239,0.809324814965617,0.878239940015561,-0.00417426178669526  
"Pttn14",3023.67293060907,-0.766594128108793,0.194379321665897,-3.9438  
0493531318,8.01989002362358e-05,0.000833538463116272,-5.43502259182277

"Cenpf",229.371154406321,-0.883848864115677,0.428703368831852,-2.06167  
930642585,0.0392382779917723,0.0965174553830399,-2.06646639909819  
"Kctd3",1675.18404690318,-0.232283755971478,0.179568879140054,-1.29356  
354555351,0.195816221195186,0.32652250993221,-0.259985262256576  
"Ush2a",1.04072355285707,-1.11839839441349,1.8980429232938,-0.58923767  
2493024,0.555701848896045,NA,NA  
"Esrrg",1541.1489916343,1.20318499364328,0.366320007128098,3.284518918  
51635,0.00102156639462115,0.00597256418660365,6.16100372950481  
"Spata17",53.8427581572468,0.669897996656189,0.269289733724416,2.48764  
773684891,0.0128591032010563,0.0410153434016352,2.13952628629101  
"Slc30a10",3.17230059117734,-2.41218629865144,1.37638972656848,-1.7525  
4599194469,0.0796799687293671,0.165876571173838,-4.33351997782186  
"Eprs",6411.97842218572,0.17041806905425,0.109227766500483,1.560208310  
70913,0.118710662327725,0.224633200122864,0.254482989725875  
"Cr2",118.975725088359,1.11192664051136,0.344683519632125,3.2259350307  
7286,0.00125561855739048,0.00700287489473674,5.51675121237278  
"Bpnt1",5638.22464371478,0.763541977135288,0.404517610892649,1.8875370  
4801722,0.0590881281846018,0.132000495341816,1.54613402409492  
"Iars2",3417.7399551707,0.291088468155276,0.226076171398714,1.28756810  
748491,0.197896347106198,0.328941263316066,0.32365430348213  
"Mark1",622.708422620372,-1.22163388616161,0.269638600337792,-4.530634  
2809642,5.88068624967655e-06,0.000112303252199994,-11.1099145023472  
"Marc1",264.420165319016,-3.37698630113035,1.06301672927897,-3.1767950  
6645291,0.00148912221498492,0.00799234906571188,-16.308380531309  
"Nek2",186.286504535572,0.250068044845325,0.386484201881898,0.64703303  
1693598,0.517610565505281,0.651078692098701,0.107310391048022  
"Lpgat1",4250.7039992134,0.35922894113322,0.155912248717601,2.30404566  
727712,0.0212200801985304,0.0602167259075747,1.00936332029751  
"Ppp2r5a",11525.1293433864,-1.38693775301178,0.510267424965631,-2.7180  
6054071587,0.00656658218185608,0.0245184257720854,-5.14322339324263  
"Pacc1",790.234908362742,0.768445651720529,0.261802937768593,2.9352063  
7419186,0.00333325914931749,0.0146466718190058,3.24556259919465  
"Atf3",737.007098708708,-1.07838560338747,0.245863996267788,-4.3861062  
2033869,1.15397784719027e-05,0.000190680170038271,-9.23627891216008  
"Batf3",501.634645561332,-1.02652128213302,0.379690250049682,-2.703575  
56455217,0.0068597848746435,0.0253847192039854,-3.77103668349103  
"Tatdn3",812.980218152877,0.231689474335819,0.151997059898453,1.524302  
34170718,0.127433202474106,0.236637388746678,0.333916967272325  
"Angel2",2922.55977048649,0.130880488487634,0.130645162964332,1.001801  
25706887,0.316439589987048,0.461683562224443,0.101154329893547  
"Traf5",1396.36169524002,0.0532828165985281,0.203464606024984,0.261877  
569959197,0.793415832879854,0.867348167161437,0.00758293370333256  
"Irf6",1841.64692083533,0.1499241615051,0.270755844101961,0.5537245631  
84836,0.579767362168946,0.704405784370021,0.0525335297327447  
"Lamb3",622.796866026878,-1.40421137828457,0.471097781308424,-2.980721  
69727593,0.00287570002265235,0.0130852739887224,-6.08903658976902  
"Plxna2",888.096703440522,-0.317758273704866,0.259953729281885,-1.2223  
647438437,0.221569725566307,0.357392993803098,-0.326947614094662  
"Usf1",2776.91262306498,-0.103631983985499,0.126792929683908,-0.817332  
514075129,0.413738430627325,0.5571600733577,-0.0606146267729966

"Nmt2",1953.67016477173,-0.110590122427595,0.201868467877534,-0.547832  
574301235,0.583806869495592,0.707770089002366,-0.0382239243563568  
"Acdb7",3.35406070713459,0.491758376860515,0.965078047974157,0.5095529  
60916258,0.610364685810105,0.730026416631421,0.154743850042731  
"Olah",0.407128752309781,0,4.78471990595371,0,1,NA,NA  
"Suv39h2",72.8904328152223,-0.2156072840682,0.243220559044657,-0.88646  
8170762707,0.375365298477251,0.520471667594186,-0.140795831011191  
"Dclre1c",575.693719973369,-0.258615368455686,0.238635438140203,-1.083  
72574698543,0.278486416279527,0.422233914822567,-0.222977089149532  
"Cfap126",231.573503984935,0.348855356045066,0.201244511898111,1.73349  
003535405,0.0830086070930415,0.170908323241829,0.616297635626196  
"Meig1",3.8667903337931,0.440976342378778,0.996512707019082,0.44251953  
7656366,0.65811329542808,0.76718241266631,0.116872259765041  
"Fam107b",4613.69099075963,0.613559761542391,0.141710918261181,4.32965  
765144197,1.49341326120743e-05,0.000230733532226803,5.13810102519696  
"Fcgr2b",3882.87524505502,-0.170253995797338,0.359930228155547,-0.4730  
19442323031,0.63619930829634,0.750839181233704,-0.048788630239001  
"Frm4a",1098.094987123,-0.613100044562391,0.232780719721353,-2.633809  
38634562,0.00844328733956309,0.0296679071088126,-2.1566955193964  
"Dusp12",874.659845570721,0.110686238844727,0.120014572128526,0.922273  
327993799,0.356386022764953,0.501508056195825,0.0763885146881163  
"Sephs1",1891.52448817505,0.220197703055135,0.123648237640479,1.780839  
80214409,0.0749386251032138,0.158099254735172,0.406161764366133  
"Atf6",1933.22878398448,-0.122006484740383,0.138036032525424,-0.883874  
177692781,0.376764138023183,0.522038226000312,-0.079305979770236  
"Phyh",14511.4594292308,1.14622413705378,0.420975698451158,2.722779821  
4266,0.00647351856779712,0.0242405732734604,4.26364140727318  
"Uhm1",5761.31768315705,0.155679600532949,0.24044183761165,0.64747301  
0850945,0.517325856460862,0.650871298644513,0.0668555698416488  
"Ucma",0.325902077166119,-1.56889382950155,4.76196181546753,-0.3294637  
56808289,0.741805184033529,NA,NA  
"Mcm10",260.805524137507,0.486907945643141,0.248738295266887,1.9575109  
8607758,0.0502874214219254,0.116946160865753,1.04492471335859  
"Uap1",2978.23994137746,0.247588617201401,0.139714091953161,1.77210912  
471453,0.0763764445595802,0.160317355584314,0.453235711713018  
"Optn",1539.19500847767,-1.04966480135772,0.333548475255204,-3.1469632  
7289341,0.00164975682807206,0.0086610012476438,-4.98477935966513  
"Ddr2",2824.83110148814,-1.3208783332135,0.24474040746333,-5.39705865  
088608,6.77422487002035e-08,3.4070609385032e-06,-16.6294098221495  
"Hsd17b7",785.023271438774,-0.206128028999946,0.223916254884534,-0.920  
558577161981,0.357280937111488,0.502435175751878,-0.141875582982623  
"Ccgc3",309.703766264702,-1.88547507817737,0.50349001376088,-3.7448112  
7062199,0.000180529431293541,0.00156234480752839,-12.1831244956359  
"Rgs5",8805.14963728918,-1.1596226734351,0.271212604696608,-4.27569608  
99082,1.90541004376146e-05,0.00027849838855518,-9.49278517798868  
"Enkur",75.8116003159668,-0.0775659101912062,0.425952574242185,-0.1820  
9987421535,0.855504347444062,0.908085566250984,-0.00747864667784946  
"Nuf2",124.603088211616,-1.21416802055576,0.437423360804708,-2.7757274  
2873657,0.00550783624866457,0.0213627170063864,-4.66982142499524  
"Lmx1a",20.2157371161072,1.19550390096866,0.452499983502989,2.64199766

752204,0.00824186234615549,0.0291122884103876,4.22801301319898  
"Aldh9a1",11032.4057878013,1.45299138064307,0.343657160190351,4.228025  
91931523,2.35750638972412e-05,0.000326932144998868,11.6613570754369  
"Mgst3",4452.48564276171,0.476986982843745,0.386279907212971,1.2348221  
4305484,0.216896704474324,0.352266232255077,0.497672977035791  
"Fmo3",17.6496727906529,1.30579314247435,0.576758972497735,2.264018775  
15564,0.0235729600394406,0.0653155570341073,3.56288927540411  
"Fmo4",771.917023108626,1.59026185172119,0.373591000979134,4.256692071  
15085,2.07473800448777e-05,0.000295717232962268,12.9226377333569  
"Eef1aknmt",669.82895167075,0.0816652730335808,0.12775288269098,0.6392  
44072723745,0.522664165101269,0.655934181451545,0.0344378232838344  
"Vamp4",1301.07487442669,-0.187709941861483,0.176013961719673,-1.06644  
916134799,0.286220648521249,0.430279892433872,-0.158299429802495  
"Myoc",164.951671921487,-4.00554653066844,1.13489350684519,-3.52944704  
195477,0.000416429039851665,0.00299193069965884,-23.2795810527948  
"Pigc",1078.50446829599,-0.147292395630415,0.102915911978708,-1.431191  
66704648,0.152375291115842,0.2713254270481,-0.192133553571375  
"Tnfsf4",2.40077980423598,-4.21092338844899,1.45701057733634,-2.890111  
74932392,0.00385104902504112,0.0163127859852817,-17.3313440104303  
"Prdx6",7240.60587571668,0.400238285311682,0.310405474959464,1.2894047  
225293,0.197257420477386,0.328307740885025,0.445786953527447  
"Klhl20",1469.26048175492,0.232543356601575,0.124562709387831,1.866877  
79789328,0.0619186549835836,0.136727009604437,0.462707555542692  
"Nsun6",223.062127565188,-0.396884557850492,0.205512128625891,-1.93119  
773759422,0.0534586036909389,0.122339889057034,-0.833835457977616  
"Cenpl",258.463317592782,0.192138232009321,0.198974001257715,0.9656449  
12374553,0.334221893473724,0.47898996537675,0.141428270346221  
"Dars2",849.084896987138,0.480484293553216,0.180678107191136,2.6593387  
6009073,0.00782941959265949,0.0280106464619587,1.71781332501842  
"Mrc1",1996.12176436037,-1.10120341863338,0.307824290815096,-3.5773766  
1221431,0.000347059956753606,0.00259072551178477,-6.55856639587099  
"Serpinc1",162.287398708561,0.545870281227912,0.471054483742231,1.1588  
262081518,0.246527032367323,0.385669501917448,0.520091278216717  
"Stam",1248.83190654375,-0.0886532010646175,0.111549194331919,-0.79474  
5328243487,0.426761659201166,0.569775323959486,-0.0498685926606583  
"Rabgap1l",2159.44075023871,-0.259308439575624,0.12920417742456,-2.006  
9663748065,0.044753243450545,0.106792160176077,-0.580039466759519  
"Trdmt1",382.44784528247,0.0282691011230817,0.167966674245344,0.168301  
844696823,0.866345822705944,0.915953305016836,0.00248174135328153  
"Tnn",131.370941668486,-0.445267260681946,1.43867929208838,-0.30949723  
3421354,0.756943316342921,0.842236690922524,-0.0764498055006946  
"Cubn",7113.74141329976,2.0593440990947,0.82522794153305,2.49548518106  
282,0.0125785009096458,0.0403248291246752,6.61211709972796  
"Rsu1",2250.31936277884,-0.597006126155289,0.164949423083043,-3.619328  
36742768,0.000295368639806035,0.00228083078769825,-3.6317169332476  
"Vim",13730.628078986,-1.11993890586613,0.269776670355801,-4.151355654  
24939,3.30511690880673e-05,0.000419551884686937,-8.70900707265464  
"Pter",13108.3714984955,1.68403394717504,0.56677674691046,2.9712474203  
5523,0.00296592729146418,0.0134169441350724,7.26026926549485  
"4921504E06Rik",0.130737126706725,0,4.78471990596536,0,1,NA,NA

"Ptfla",0.087583724926668,0,4.78471990595887,0,1,NA,NA  
"Pip4k2a",1866.01815630635,-0.904319242089008,0.272258989243188,-3.321  
54043693025,0.000895220093459512,0.00541408231460098,-4.71941774827988  
"Bmi1",2745.17599865952,-0.245327960761197,0.104591284637749,-2.345587  
03061051,0.0189971429084076,0.0552480488011951,-0.710450701347848  
"Dnajc1",3280.71702351651,0.25613671686226,0.145438129579354,1.7611386  
8902933,0.078214932125224,0.163437439350297,0.463946837597581  
"Mllt10",2569.97649375443,0.181004275270845,0.155742988742119,1.162198  
54731666,0.245154824616083,0.384344188693584,0.17307932945247  
"Plxdc2",3056.39153634997,0.588017693349289,0.240193815382728,2.448096  
7272714,0.0143613095464351,0.0448385610146342,1.82561075474272  
"Nek6",1000.55613557612,-0.522674705055412,0.138457604561693,-3.774980  
12268817,0.000160020422897934,0.00143122853470822,-3.42311272337489  
"Psmb7",6326.21442818582,0.278873023831393,0.313799967742181,0.8886967  
89352495,0.374166057064271,0.519296663885932,0.182739901783136  
"Nr5a1",0.580960465210693,-1.53504002134171,2.61899672165099,-0.586117  
58031298,0.557796502994913,NA,NA  
"Ppp6c",2856.08437553978,-0.100648634811893,0.206383170744376,-0.48767  
8498439947,0.625777583997036,0.742584829454945,-0.02995486214408  
"Golga1",1361.4129746999,-0.0857936309830242,0.136667394087125,-0.6277  
54934204213,0.530164492379451,0.662467782133718,-0.0353283890361664  
"Arpc5l",3592.88466379208,0.313461436136496,0.188103404235478,1.666431  
48969323,0.0956275031810885,0.190746297393848,0.519346361668661  
"Orc4",1876.40615476256,0.0498843857101828,0.166860401613346,0.2989588  
01656109,0.764971480253226,0.847825885870919,0.0082349137713462  
"Kif5c",228.56390034463,-0.834944430234317,0.376059814849098,-2.220243  
68801371,0.0264022301740252,0.0715284333817482,-2.20229972511718  
"Lypd6b",281.240500167285,-0.153336225227936,0.272506300607976,-0.5626  
88733749768,0.573646857258781,0.699642597594282,-0.0547694991526564  
"Mmadhc",3029.35906195757,0.189819666362832,0.274262195626704,0.692110  
212014759,0.488868119054869,0.625456075153007,0.0890774673534569  
"Mindy3",1704.38991979086,0.490764416071926,0.104983537014322,4.674679  
76436131,2.9441265493023e-06,6.52324766571549e-05,4.72976812184319  
"Itga8",823.411007784307,-0.464464593918372,0.403467283779656,-1.15118  
279124715,0.24965704332479,0.38924551713642,-0.438243238303501  
"Il2ra",107.739454657086,-0.996170907182687,0.278371001300445,-3.57857  
284892805,0.000345475576060849,0.00258293907517811,-5.93601044897897  
"Spopl",1081.21695074968,0.460477320164453,0.264582220015438,1.7403940  
4513872,0.0817898504444244,0.169160500457647,0.818225515320263  
"Pfkfb3",3795.58005854121,-2.38370063036917,0.637907560291348,-3.73674  
930154532,0.000186414617426792,0.00160260679479171,-15.3417921894132  
"Potegl",2.03364252942864,1.05210875169089,1.37313418786159,0.76620971  
2780775,0.443551530043636,0.584823352230918,0.564398941543134  
"Yme1l1",4177.09523483896,-0.145612994163946,0.145792421250399,-0.9987  
69297574498,0.3179064622737,0.46295766684686,-0.112139429756943  
"Prkcq",486.767608248519,0.121777307962569,0.190417407274738,0.6395282  
3276743,0.522479353130732,0.655806774001739,0.0513765170609713  
"Mastl",105.2509235139,-0.145796854272276,0.228583687837179,-0.6378270  
28042909,0.523586283420712,0.656564801396286,-0.061341676587581  
"Acbd5",3838.87224619213,0.140060879800149,0.223903123184305,0.6255423



22984295,0.531615179959447,0.663914743299168,0.057369151555025  
"Abi2",1153.67375475589,0.254310569504555,0.160255318946829,1.58690876  
019493,0.112533310583049,0.21560500876514,0.390190539980413  
"Pdss1",758.210855164222,1.46544132249631,0.221125129415417,6.62720391  
106364,3.42104913327275e-11,1.09350190164839e-08,26.8634378381914  
"Pkn3",748.972033721106,-0.791361353318331,0.240119251968703,-3.295701  
39349541,0.000981763067075403,0.00578845366853226,-4.07700671567271  
"Apbb1ip",572.379736216067,-1.22480668800259,0.334029151299484,-3.6667  
6585932003,0.000245637518614555,0.00198031064414007,-7.62381113478382  
"Gad2",7.77377335096777,0.210669501666411,0.680334044122063,0.30965597  
486492,0.756822585147728,0.84217137114544,0.0361870703996617  
"Zbtb43",1413.17091726168,0.225958452514343,0.17966607540223,1.2576578  
6339171,0.208515517205038,0.34187988180826,0.242520264022445  
"Odf2",2409.65700447742,0.188829953943154,0.196600084283387,0.96047748  
2150857,0.336814958649218,0.481255903835735,0.138101943540429  
"Slc2a8",875.719263698203,0.0125849431030407,0.168330996212158,0.07476  
30762380751,0.940403220457113,0.963074845972624,0.000473497768545372  
"Lrsam1",760.975075551706,-0.321285235571153,0.252251164563917,-1.2736  
7196154111,0.202779697261858,0.334869021530592,-0.351491125343836  
"Fam129b",5218.85252624242,-0.748075327695226,0.142122833597024,-5.263  
58297792121,1.41274700993695e-07,6.00125080604588e-06,-8.9945156025613  
6  
"Stxbp1",982.100456115626,-0.428621475982356,0.236641226786088,-1.8112  
7135708187,0.070098857195196,0.150262479946343,-0.81239699321912  
"Coq4",926.51556255064,0.444853246836103,0.165925590900709,2.681040606  
34207,0.00733936094269393,0.0266933146167965,1.61185551262454  
"Med27",444.942555885073,-0.165620460866472,0.145152121617066,-1.14101  
3021521,0.253864504250925,0.394347522616677,-0.15411360195707  
"Ttf1",1459.96152723259,0.311357977536155,0.19331606341923,1.610616169  
33993,0.107263407364534,0.20770899958225,0.489335558868981  
"Barhl1",6.81488899786252,0.975064408199664,0.901182427898565,1.081983  
37874095,0.279259913590739,0.422979087640195,0.838977144787588  
"Ddx31",384.532567763541,-0.300256510597727,0.184987437037805,-1.62311  
838796039,0.104564099536191,0.203981071811571,-0.4773262045027  
"Ak8",11.5060384806998,-1.11835433314642,0.731030651028598,-1.52983234  
228666,0.126058233823452,0.234979296662492,-1.61966546222194  
"Spaca9",13.8176846769197,-0.696756653471336,0.623797057288629,-1.1169  
6046868164,0.264011227990922,0.405905292806102,-0.628220474784507  
"Dpm2",1601.72081973771,0.0126759249088885,0.104132253627401,0.1217290  
94179069,0.903113570756599,0.940747323571544,0.000774254296953616  
"St6galnac6",899.369508010792,-1.34533576082166,0.24740290722535,-5.43  
783327330201,5.39324056445216e-08,2.89689819629995e-06,-17.15554670261  
47  
"Tsc1",2387.72341818995,0.365834624255947,0.24795863065209,1.475385725  
81185,0.1401088707611,0.254503704313391,0.500622692184278  
"Eng",6774.65782199668,-0.530567378620026,0.176286682674865,-3.0096849  
6638274,0.0026151878828398,0.0122397823666852,-2.33612200900731  
"Gfi1b",3.83356182372442,-3.55044484068352,1.5605116543274,-2.27517995  
834117,0.0228951366265504,0.0638822801866743,-9.76625570723591  
"Gtf3c5",970.945278018789,-0.318892962295484,0.104726237106132,-3.0450

1499440212,0.00232668709736801,0.0112235885760716,-1.43174572082887  
"Ak1",1601.32917672725,-0.146015694297688,0.148096439113183,-0.9859500  
68563733,0.324157615624964,0.469013445343985,-0.110551963581023  
"Cel",1.98980616468468,3.81736690350092,1.58863964963548,2.40291554121  
593,0.0162649434861734,0.0491375686540764,11.5022280481024  
"Slc25a25",4015.44712227844,0.606901914567266,0.424467062620983,1.4297  
9742837946,0.152775167393517,0.271938124323424,0.790295973700786  
"Ptges2",1526.13117580339,-0.109069181282548,0.376791833341192,-0.2894  
68007614124,0.77223258657553,0.852690514061897,-0.0173811139831726  
"Ralgs",1247.79358863863,-0.603501602088897,0.201365481067715,-2.9970  
4596283785,0.002726096079618,0.012604558065068,-2.63953301332542  
"Lcn2",4005.00303027482,-0.857914405602587,0.59049806580816,-1.4528657  
336556,0.146261036620921,0.2629407069231,-1.14602498749212  
"Kcnj3",2.77863948279055,-0.0386840523793604,1.06414012114692,-0.03635  
24047356348,0.971001364590548,0.982286220130046,-0.000691382527598577  
"Dnm1",604.733752527075,-0.52450365041356,0.304469270018766,-1.7226817  
3527408,0.0849460950506775,0.174161825583397,-0.916711944337523  
"Nr4a2",273.473556083217,-1.99024715439057,0.50698877330773,-3.9256237  
2023678,8.65052932300917e-05,0.000883078642617973,-13.995609647169  
"Gpd2",3392.2334270149,-1.11228311809719,0.576803060761754,-1.92835855  
730075,0.0538105428698682,0.122928876962705,-2.33151150935308  
"Galnt5",7.13633199980767,-3.09559126866199,1.30088733513964,-2.379599  
82009487,0.0173314482473739,0.0515213565981545,-9.18077725069131  
"Gbg1",50.0150932352195,-1.43713450091324,0.366307653375498,-3.923299  
13849781,8.73445895431337e-05,0.000890016462292256,-10.0948216207853  
"Ernm",0.103872140811095,0.4.78471990596623,0,1,NA,NA  
"1700007K13Rik",30.0576133151579,-0.0981126160636567,0.393904780604229  
, -0.249076987370291,0.803301230005445,0.874624044150445,-0.01314327875  
81436  
"Cytip",1354.76950977337,-0.328362716749271,0.377572841230776,-0.86966  
7202966468,0.384482300407326,0.529161847486556,-0.208990044688759  
"Olfm1",1374.42458831897,-0.179055563985707,0.173792704775802,-1.03028  
239428516,0.302877461204572,0.447488424533359,-0.143979404190353  
"Acvr1c",436.010629524444,-3.86427126292406,1.79875496689779,-2.148303  
31759336,0.0316896675209942,0.081958500772562,-9.66663782179464  
"Fcnb",0.725023989220248,-3.34468781683484,4.27030427423073,-0.7832434  
41695348,0.433484168997292,NA,NA  
"Acvr1",818.640717436571,-0.762604482742486,0.146818750604615,-5.19418  
997643012,2.05613097663213e-07,7.91735059471335e-06,-8.95789842256218  
"Col5a1",2686.27043724733,-1.74159907021867,0.314665600891658,-5.53476  
155411828,3.11652040922666e-08,1.89893484184692e-06,-22.9442048418311  
"Upp2",558.253530683196,0.447872466325573,0.188104765937373,2.38097351  
810154,0.017266953205032,0.0514121255189118,1.32923228593022  
"Lamc3",717.017140283671,-0.267604219942902,0.172851797424444,-1.54817  
146208662,0.121581020309581,0.228887393453337,-0.394589146667956  
"Fibcd1",2.04489837267094,-1.00944132940473,1.45245674725638,-0.694988  
908490062,0.487062252520845,0.623856226874441,-0.476290095706369  
"Abl1",3048.82081429582,-0.26757950026047,0.174994333433776,-1.5290752  
2780863,0.126245795682699,0.235194011486839,-0.387279724609849  
"Fubp3",1679.924039349,-0.183065363614417,0.0966009621705337,-1.895067

70430758,0.058083432602308,0.130398476554957,-0.372933493333768  
"Tor1b",2491.40047225975,-0.266311309441,0.0882314425563054,-3.0183265  
933916,0.00254174819200955,0.0119823516073023,-1.17824656207337  
"Tor1a",1171.62409098106,0.237497859114116,0.0914722692574026,2.596391  
9015259,0.00942085440870392,0.0323313009777889,0.815026021856648  
"BC005624",1968.15680063955,-0.328694380617206,0.147396336032053,-2.23  
000374002328,0.0257471945861679,0.0700654291753107,-0.873776742774546  
"Crat",6446.3977601187,-0.66087584439657,0.567820070890564,-1.16388250  
130021,0.244471631936733,0.383620732278136,-0.633185735242483  
"Usp20",3238.97079957828,0.84080170800508,0.206859861021629,4.06459573  
090967,4.81157874257906e-05,0.000562784417053428,6.29139456541908  
"Dolpp1",822.092956787962,-0.0406790883006843,0.191659332332334,-0.212  
246843426061,0.831914463363256,0.892654640167043,-0.00461933478280954  
"Ntmt1",896.011075959716,-0.0151050069884115,0.130790338341622,-0.1154  
90235593378,0.908056559557892,0.943527140861166,-0.000878056298404117  
"Miga2",2042.75440432687,-0.905960712984807,0.45326701414571,-1.998735  
14884445,0.0456370178331302,0.108330968311465,-2.01355586226195  
"Sh3glb2",3056.4867927573,-0.599707733632559,0.336250251310362,-1.7835  
1609045795,0.0745023310994257,0.157459776542534,-1.10861086492577  
"Hspa5",23547.9152379939,-0.394635480294786,0.176419356183864,-2.23691  
713217397,0.0252917566145174,0.0690863926127572,-1.05462286728704  
"Kynu",251.727498431227,1.20698107432579,0.479220677724439,2.518633127  
55429,0.0117811337960958,0.0385027729649695,3.93116755197372  
"Gapvd1",3695.33073954762,0.034734143747353,0.139278693256825,0.249385  
91061667,0.803062282630663,0.874461542875722,0.00465947984813978  
"Psm5",1888.52245824419,0.0938503446185082,0.259060417035219,0.362272  
035583689,0.717148753299636,0.812537997085031,0.0194826370717071  
"Cutal",1565.60096403784,1.64241834503595,0.498024964012617,3.29786348  
821329,0.000974234865746379,0.00575276541863201,8.47171634386292  
"Zeb2",4395.17348201512,-0.486813323959302,0.252875211785886,-1.925112  
86701955,0.0542152395763309,0.123581354386139,-1.01785636446696  
"Phf19",85.0932257379298,-0.953464500159456,0.326812926127479,-2.91746  
263361548,0.00352891928220929,0.015314237294573,-3.98450177442592  
"Hc",18.2194905600864,0.990484939212815,0.777438270591407,1.2740367649  
5028,0.202650386982213,0.334683825629272,1.08415410637092  
"Traf1",1523.09502571345,-0.911168911468239,0.453208638263317,-2.01048  
443154087,0.0443799423284279,0.106200308728484,-2.04323091956237  
"Rab14",10231.4470552097,0.338824618777007,0.157455847481526,2.1518706  
6213442,0.0314075425003402,0.0814232500560607,0.849804135555007  
"Gsn",18304.6556969936,-2.28460261099626,0.478202004295528,-4.77748439  
043426,1.77501824734464e-06,4.3046400232246e-05,-22.9676399593744  
"Stom",1625.6812236951,-2.00428958264487,0.449512890840498,-4.45880334  
799132,8.24184928774308e-06,0.000146356627880159,-17.696803232603  
"Dab2ip",2871.58364256436,-0.471982824009646,0.142575175839333,-3.3104  
1376053795,0.000931581535618011,0.00556494386687499,-2.4501895107132  
"Ttll11",55.6226653338065,-0.415597623930048,0.348234291346433,-1.1934  
4255938483,0.23269609547247,0.369953397710553,-0.413261231093014  
"Mrrf",1072.68719329918,0.0621230954178548,0.290301928109803,0.2139947  
73725229,0.830551132747391,0.891990415109261,0.00710066308783845  
"Grb14",899.272312935502,0.944899146099203,0.218803877934745,4.3184753

1688174,1.57110788783694e-05,0.00024000609213858,7.87558910546989  
"Rbm18",1628.24733730944,-0.0727329962345959,0.108586785116405,-0.6698  
14436044186,0.502976089792317,0.637813982750429,-0.0327086540004527  
"Lhx6",65.8562905664407,-1.56665153439716,0.487276528432465,-3.2151179  
9354869,0.00130390913786951,0.00720011905131115,-7.72932243439667  
"Gca",876.49456844167,0.912914760565278,0.205959137299043,4.4325042944  
7939,9.31448466812183e-06,0.000161722014300124,7.96940959469434  
"Morn5",21.4323611904535,0.188855318028096,0.424041092292188,0.4453703  
22501586,0.656052155556151,0.7656892142228,0.05042038830103  
"Ndufa8",7394.13442399101,0.784684420694118,0.303128220590139,2.588622  
13213429,0.00963607693210822,0.032852636478798,2.68026484256343  
"Ifih1",974.403588028546,-0.810970715384744,0.171334154803937,-4.73326  
941912289,2.20931917771308e-06,5.17134517731689e-05,-8.00411278275989  
"Slc4a10",2.12828399449812,0.521591662955009,1.9028425110344,0.2741118  
40538747,0.783998674778688,0.860390831646905,0.0784309755645302  
"Psm14",2312.70762826627,-0.23532549445554,0.229855877209296,-1.02379  
58555276,0.305931708355619,0.450410901302331,-0.187694437479072  
"Strbp",2782.32066585089,0.6214428625063,0.123710272190987,5.023373172  
65701,5.07717568955184e-07,1.59411870523159e-05,6.86483347008812  
"Wdr5",2515.89961845774,0.364980691480969,0.0654460321547332,5.5768192  
4273194,2.44956165327247e-08,1.59205177051689e-06,4.87266995931282  
"Brd3",5848.43628378819,0.220172831253669,0.209187008434684,1.05251675  
475064,0.292562527576045,0.436482069223179,0.182525034765017  
"Lcn4",1.01697395886539,0.96819323989293,1.83268843497727,0.5282912367  
50747,0.597297212978061,NA,NA  
"Egfl7",5057.37073929418,-0.253977585796737,0.162032971465951,-1.56744  
385725288,0.117010979453581,0.222212120902214,-0.382013491136987  
"Agpat2",9786.65557176608,-3.14507880440223,0.814427056670271,-3.86170  
717026601,0.000112597475295289,0.00108954122744791,-21.4557230860116  
"Notch1",2801.16356155227,-1.18856354322511,0.228898317876594,-5.19253  
943956853,2.07444907140687e-07,7.96212755793131e-06,-13.95470385982  
"Sec16a",3556.04983213719,-0.0396571625942362,0.135437543606062,-0.292  
807751369031,0.769669103073574,0.850978631796345,-0.0063994073341453  
"Inpp5e",1585.49249215802,0.43030961749548,0.231859935920041,1.8559032  
8828468,0.0634673442129801,0.139246796158961,0.848358598744121  
"Pmpca",4441.73694774988,0.130220366338972,0.164671063540296,0.7907908  
2590067,0.429066064311895,0.571678782997034,0.0728163657702906  
"Entr1",5060.271804312,0.19326735935712,0.140846701842567,1.3721823573  
3447,0.170006676233283,0.294412485406923,0.236322202220203  
"Card9",376.895148658626,-0.622171213241934,0.437259563905099,-1.42288  
760407072,0.154768740242242,0.27453428832271,-0.804267732634486  
"Gpsm1",1183.22830220236,-0.286053109003317,0.27459222062996,-1.041737  
84802448,0.297533236473276,0.441802074842429,-0.233674865805718  
"1700019N19Rik",0.705558652691576,-2.71174956349691,2.47805618981787,-  
1.09430511488774,0.273821182762988,NA,NA  
"Nacc2",3270.96230562919,0.263737261421525,0.146672048187459,1.7981426  
2281554,0.0721544093082558,0.153504274161743,0.494250713901899  
"Camsap1",1504.45439998116,0.0561401907428296,0.152858142308251,0.3672  
69874506379,0.713417722968161,0.809958004101153,0.0118328296556511  
"Lhx3",2.50346479342393,0.70151621616171,1.48078588781479,0.4737458817

87775,0.635681130607049,0.750318462653687,0.201515826526472  
"Fcna",18.488032918377,-1.67296323799461,1.08264678568075,-1.545253041  
08549,0.122285069159491,0.229863271552888,-2.45970869438035  
"Tmem141",585.854266805766,-0.0297025888661055,0.236088929546637,-0.12  
5811019276268,0.899881518965676,0.938676966139543,-0.00187969500957331  
"Ccdc183",0.385352917787171,1.61481522965431,3.81543357659935,0.423232  
431448478,0.672125686904567,NA,NA  
"Mamdc4",243.401789722315,-0.487140609239357,0.28523739831021,-1.70784  
270269345,0.0876655331327114,0.178386825821499,-0.839733424459862  
"Traf2",1880.36722577831,-0.14319758413708,0.181798805661944,-0.787670  
653917039,0.430889375235627,0.57330895304314,-0.0796651868049902  
"Lcn12",1.03371941091515,3.38060208437278,1.62095792351461,2.085558196  
99679,0.0370186613236379,NA,NA  
"Abca2",3548.36731383004,0.0881420940569223,0.183735979477271,0.479721  
469402381,0.631425459645092,0.746787189867767,0.0257352897478896  
"Nmi",955.284120918999,-0.185254334930937,0.136413314645657,-1.3580370  
4654599,0.174451929180959,0.300535758541291,-0.222710637564304  
"Neb",42.3435254429911,-0.498980096190314,0.531675181944624,-0.9385055  
25808585,0.347984678552151,0.492817046240772,-0.35308693683116  
"Sapcd2",39.3585145251684,-0.674628481040943,0.58833653700764,-1.14667  
106087308,0.251517595166794,0.391512858898463,-0.632624033202639  
"Uap1l1",3378.74519022394,0.846095089028285,0.323630653165443,2.614384  
88830585,0.00893882760782825,0.0310233643106862,2.9385006572015  
"Dpp7",2953.17049684332,1.1144337534713,0.247286327003672,4.5066533478  
608,6.5858094525077e-06,0.000122473077570503,10.0383950165052  
"Grin1",11.0305928219478,-2.14908489257832,0.818441764555268,-2.625825  
05640595,0.0086439231135727,0.0301825237944915,-7.52285491307314  
"Arl6ip6",849.686443805235,-0.00673402539034785,0.192545752402035,-0.0  
349736377268256,0.972100762055521,0.982990387851807,-0.000115528517127  
241  
"Lrrc26",88.0906481004942,-1.10009298736814,0.600445095884187,-1.83212  
91903437,0.0669321753434988,0.144956520587309,-2.12463317199888  
"Tmem210",0.322228676776401,-0.948735596185645,4.77597479756428,-0.198  
647529854951,0.842538471007386,NA,NA  
"Anapc2",4357.48365618898,-0.19430494021931,0.0771666078562066,-2.5179  
9250501435,0.01180258325546,0.0385375074765853,-0.632680841552486  
"Ssna1",1587.42919721731,0.0811557712738249,0.149341668938269,0.543423  
492256346,0.586838254516998,0.710252780047947,0.0277661765725284  
"Fam166a",9.4558215172073,1.63310563715639,0.791744753036511,2.0626668  
2651585,0.0391442937861975,0.0963681111418282,3.82078117124038  
"Rbms1",8304.01799815732,-0.163133436021475,0.191091163670037,-0.85369  
4293803993,0.393274396650009,0.537881580771407,-0.101161792987301  
"Itgb6",4215.3616181926,0.472708820860638,0.360391968804577,1.31165192  
839512,0.189637603402343,0.31904364758945,0.540035489913754  
"Arrdc1",2594.57689551536,0.0753894497130003,0.1633753165513,0.4614494  
48450361,0.644476181672093,0.75738382711807,0.0209496060465618  
"Zmynd19",672.364444051699,-0.136489543279281,0.103584779010384,-1.317  
66022559742,0.18761741490321,0.316504962431457,-0.157019803343464  
"Dph7",590.109079564542,-0.171469336918397,0.154880685854544,-1.107106  
00209656,0.26824810083041,0.410445065525491,-0.152695704897871

"Pax8",3641.32570928672,0.520155523421388,0.559027875883727,0.93046437  
5500257,0.352130700843251,0.497200695563886,0.363464664382377  
"March7",2917.91391603592,-0.276634647740391,0.164670963866847,-1.6799  
2365651104,0.0929721704157247,0.186671957446792,-0.4643042679933  
"Psd4",808.516165972504,-1.4587145426562,0.393842742298267,-3.70379947  
62678,0.000212394172482439,0.00177204175227326,-9.2418652097358  
"Ly75",231.558109107977,-0.846667257811883,0.276892259201586,-3.057749  
82750775,0.00223005665990464,0.0108704111887052,-3.82838444192783  
"Il1rn",258.384279543384,-1.49750459293617,0.471390404209632,-3.176782  
08882294,0.00148918884786805,0.00799234906571188,-7.2318548466754  
"Il1f5",18.2506990082279,1.06699087766225,0.699713737723534,1.52489628  
277648,0.127284969195465,0.236428590490624,1.53871721118867  
"Il1f6",112.30037850731,-1.0093308438668,0.659567788733283,-1.53029129  
243143,0.125944642666018,0.234869431232412,-1.4622433627602  
"Il1f8",0.24961578387899,-0.923986736915312,4.78284172616633,-0.193187  
813817944,0.846811882131672,NA,NA  
"Hnmt",626.076225545473,-0.0388595776125521,0.43645508211235,-0.089034  
5403345516,0.929054459896007,0.956274289133313,-0.00173743090248372  
"Baz2b",3792.06527096825,0.832733339079355,0.224326721612844,3.7121450  
9396047,0.000205510114750652,0.00172964263644837,5.29605118254893  
"Wdsub1",947.479260262215,-0.361881903796233,0.120029621944759,-3.0149  
3829550493,0.00257031541026508,0.0120819695924177,-1.59808534387688  
"Dapl1",22.082016987871,-0.875648610717779,0.451669034232619,-1.938695  
24884631,0.0525384575374273,0.12074809416459,-1.85116386834384  
"Pkp4",13626.2496061449,1.16957915451038,0.213156160394042,5.486959196  
24509,4.08911539506228e-08,2.29768218942145e-06,15.185359240067  
"Galnt3",1934.5136829252,0.652751736997213,0.454370517532789,1.4366067  
1590583,0.150829774250074,0.269197728115129,0.856612057975829  
"Nup35",627.221678791397,-0.106951517003949,0.106690106296006,-1.00245  
01869669,0.316126213481247,0.461371633463077,-0.0827324972512931  
"Dusp19",347.57527283724,-0.27342481704518,0.261701090899709,-1.044798  
15542673,0.296116267606398,0.440469559489591,-0.224184819158733  
"Nckap1",6642.14176836062,0.0190974692991004,0.15853404292146,0.120462  
892052539,0.904116473391451,0.941409020842224,0.00115305874535147  
"Frzb",1245.58740253203,-0.389405367348703,0.484905793870168,-0.803053  
649330009,0.421943726367355,0.565161693804402,-0.222211604770106  
"Dnajc10",2979.83165720641,-0.221101528766634,0.124177322314491,-1.780  
53065282462,0.0749891574221761,0.158188747313382,-0.40770378023434  
"Itprid2",4508.83684551161,-0.0522235598064087,0.0760998614454525,-0.6  
86250392766377,0.492555225206797,0.628953179092865,-0.0242159843679606  
"Itga4",794.328698802936,-1.17574935855909,0.378533869383755,-3.106061  
18409744,0.00189597481312518,0.00958209354751548,-5.46471744688983  
"Slc25a12",1832.44408790019,0.710047176366974,0.210541989922274,3.3724  
7299994222,0.000744963902150935,0.0046855826335932,3.80817117612551  
"Ube2e3",2059.34358032904,-0.0319820446360519,0.180912320391481,-0.176  
782015546786,0.859679616066957,0.911029575198301,-0.00298008428727451  
"Dync1i2",7530.27247869937,0.159922313726562,0.196069987245368,0.81563  
8925535453,0.414706679442918,0.558036634629263,0.0932875896621847  
"Cwc22",964.129303508573,-0.209269220531477,0.112159287516878,-1.86582  
159324065,0.0620663302053693,0.136943454378668,-0.416066381453736

"Cybrd1",68.9066955696977,-0.749415717041673,0.350375278118846,-2.1388  
943907951,0.0324442224377677,0.0835001912739696,-1.86072904744512  
"Zfp385b",221.514702163624,0.279193563534932,0.369764777762056,0.75505  
7215629645,0.450214652836171,0.590891579227225,0.14689008026138  
"Hat1",1111.76489715549,0.0594336421340358,0.195375435626363,0.3042022  
24519652,0.76097383018173,0.84523772814549,0.00999301545233552  
"Xirp2",52.8210010682174,-1.43996086973532,0.67728128000746,-2.1260898  
7172871,0.0334957770976731,0.0855291594880081,-3.54071677961028  
"Stk39",1682.88718623222,0.586996717934888,0.172919704602965,3.3946201  
7520023,0.00068723871167901,0.00440203035490057,3.18486187044858  
"Cers6",2463.99249802339,0.409221548800883,0.139155331636278,2.9407536  
4550529,0.00327414817522606,0.0144334933575758,1.73436434181936  
"Abcb11",10.5786929073792,2.21754108362463,1.07751980012172,2.05800495  
116111,0.0395896581228397,0.0971211819425174,5.17085294482214  
"Ssrp1",4155.87550767708,0.0438189748415098,0.177245908553228,0.247221  
361548951,0.804736914184593,0.875649330474424,0.00581870308416814  
"Dhrs9",30.6268333006899,-2.5770387272441,0.718778453296487,-3.5853032  
5363148,0.000336686747533217,0.00253170775295127,-15.4077568643994  
"Lrp2",34964.4815468399,2.03131373122158,0.793835321739575,2.558860352  
5102,0.0105015917482864,0.0352548271191614,6.79505485538354  
"P2rx3",31.0721514198191,0.453183769469407,0.453297091797252,0.9997500  
04291014,0.317431506271225,0.462473250338216,0.349480168916112  
"Prg3",1.44023577335418,-1.54645096509672,1.613515476192,-0.9584357807  
00684,0.337843059868168,0.482406736090044,-1.1273127567405  
"Prg2",20.8929804969638,-1.88915089247315,0.781548642440452,-2.4171891  
4202718,0.0156408873457689,0.0476434965580068,-5.75059258686024  
"Slc43a3",2988.19819639722,-0.838559421498577,0.15962800627204,-5.2532  
0989143655,1.49471033252737e-07,6.24065568814102e-06,-10.0496527489722  
"Slc43a1",352.809032449076,-1.87202208920372,0.465080680276203,-4.0251  
5556675448,5.69376624563e-05,0.000639499160468282,-13.7683953297469  
"Timm10",912.629335124102,0.317927426517844,0.313289129644452,1.014805  
16377525,0.31019871177908,0.455337987071332,0.250118372976954  
"Ube2l6",1381.45839698124,-0.903554971654283,0.213962865990311,-4.2229  
5227478959,2.41122892347034e-05,0.000332255417313249,-7.23711982428278  
"Clp1",624.223616661455,-0.00173574503369075,0.16285366811288,-0.01065  
83109475166,0.991496059258412,0.994470947578839,-9.62365471134927e-06  
"Med19",1172.58012702661,0.0493154864341465,0.158178680789755,0.311770  
753099747,0.755214752588964,0.841054217842108,0.00853646892093245  
"Tfpi",743.888336364851,-0.620937992634364,0.269932755972854,-2.300343  
24806734,0.0214287813159778,0.0607117666519813,-1.73963090206947  
"Fastkd1",1151.11543261063,0.771405363316327,0.177810482906549,4.33835  
705694444,1.43551803072607e-05,0.000224581036196255,6.48078778595772  
"Itgav",7229.47568931672,0.842225860932365,0.384003395823825,2.1932771  
1705645,0.0282874192905528,0.0752145235684165,2.17918440157108  
"Phospho2",1020.34163750344,0.295975113811132,0.164205748554253,1.8024  
649953917,0.0714722772810899,0.152435622667544,0.556733012634992  
"Zc3h15",4662.64224148919,0.232751022298272,0.102414686754351,2.272633  
24894546,0.0230482902550033,0.0642268920097262,0.638979126849238  
"Mtx2",2891.70227625376,0.34924022634312,0.189422264044234,1.843712660  
20537,0.06522502699204,0.142124751804153,0.681385169182928

"Hoxd8",4376.53912741206,0.989832076237262,0.237787487584693,4.1626751  
9494571,3.14540639179589e-05,0.000404545737646677,7.73330635257918  
"Atf2",2406.02421458134,-0.000762989022588981,0.104256033926413,-0.007  
31841595976618,0.994160801020032,0.996250456664318,-2.866237309713e-06  
"Chrna1",4.71419905194103,0.214972387230912,0.859237102516912,0.250189  
833052142,0.802440547340972,0.874030362654743,0.0289439174830866  
"Ola1",1692.08498145203,-0.0379730990254316,0.248815880540918,-0.15261  
5254873922,0.878701694281953,0.924405181564126,-0.00298486767469134  
"Sp3",2516.57208776131,-0.500129940475887,0.109205451434188,-4.5797158  
8329806,4.65607980851406e-06,9.38823620541957e-05,-4.63793901231966  
"Itga6",5097.28631764884,-0.124980718397733,0.139700396838321,-0.89463  
3953992101,0.370982795039891,0.516098107609161,-0.0826695460906645  
"Kif18a",128.024531900536,-0.0183650833891582,0.274255375456932,-0.066  
9634400367192,0.946610808467683,0.96717384691573,-0.000612971756376534  
"Arl14ep",1172.74319770575,-0.224085201044909,0.175034201476224,-1.280  
23665749318,0.200461917290584,0.331997491151942,-0.247082587224265  
"Slc12a6",3426.22122069827,0.533024863528591,0.142601807890402,3.73785  
488006052,0.000185597015850076,0.00159682282172788,3.43254119370757  
"Emc4",1994.05517952859,0.0912976249433339,0.260410594565162,0.3505910  
54468365,0.725895168584878,0.819590248252241,0.0181637319478703  
"Katnbl1",789.764424900812,-0.0694752461342741,0.0882517852382843,-0.7  
87238988386325,0.431141977746666,0.573385600034411,-0.0386419122988508  
"Nop10",2638.32290503208,0.194208269346432,0.3421866549498,0.567550681  
878355,0.570340103264026,0.697122074563815,0.0700693221827996  
"Lpcat4",1445.98204237374,-0.399580438229112,0.304936098722789,-1.3103  
7433712419,0.190069230814215,0.319590364126903,-0.455807485638254  
"Ccgc34",1633.86547930019,0.674202765812023,0.234459687476941,2.875559  
43227269,0.004033122104062,0.016896823116674,2.75117180032012  
"Lin7c",3478.29785632458,0.0936713227530399,0.0841865208308837,1.11266  
413944353,0.265852702455229,0.407616733903639,0.0840632606938194  
"Commd9",1552.98221631089,0.583015499539803,0.158067233527988,3.688401  
99532292,0.000225666916235366,0.00186206243451425,3.66487657339498  
"Traf6",1219.03194065472,0.0051847174366989,0.114842686910306,0.045146  
2568160586,0.963990731379284,0.978290286807541,0.000113798513824009  
"B230118H07Rik",1447.49462676933,0.783173160945444,0.247271419508314,3  
.16726115174467,0.00153882060278257,0.00821800167435073,3.760349704189  
43  
"Dnajc24",385.349381324066,-0.295852865732492,0.280885814665812,-1.053  
28517954703,0.29221030928541,0.436190216693227,-0.245462274874457  
"Elp4",355.183298156619,-0.314256802992522,0.21814709376028,-1.4405729  
5275203,0.149705366176734,0.267597655822695,-0.414275539045671  
"Pax6",14.3970747846369,-0.104225471609919,0.776426100493981,-0.134237  
46515426,0.893214801090498,0.93382853574598,-0.00713552990666968  
"Eif3m",4008.99229339667,0.26058025004082,0.205734822936023,1.26658310  
111095,0.205304398052304,0.338093340643905,0.282581891573483  
"Prpg4",73.1094590325114,-0.328506587177729,0.39179248536021,-0.838470  
872854294,0.401766299711799,0.545746085535784,-0.198944067569528  
"Depdc7",783.377856433137,1.21040721611876,0.330663562251884,3.6605400  
6034306,0.000251684198048057,0.00202114435483568,7.50947701900153  
"Tcp11l1",276.8076806618,0.938836463371035,0.192411997403642,4.8793031



4138127,1.06461325171533e-06,2.92776152072573e-05,9.80022028577096  
"Cstf3",1335.65525676516,-0.0386172275419315,0.12888908308211,-0.29961  
5969161097,0.764470101855066,0.847537274462391,-0.00638807950638115  
"Hipk3",4190.60320037556,-0.333961778929993,0.231324160386777,-1.44369  
605998615,0.148824490224611,0.266486554289164,-0.441641572779108  
"Fbxo3",3781.82730151153,0.237760518969751,0.121389126642982,1.9586640  
5455762,0.0501521426877909,0.116662667397584,0.510821031486356  
"Caprin1",10574.5311784149,-0.200572986204697,0.184482309836044,-1.087  
22070090598,0.276939284318294,0.420476729920425,-0.173769643880919  
"Nat10",1562.14066119918,0.119988675839997,0.164595331228717,0.7289919  
76529784,0.466006570460483,0.604786870054429,0.0603398049861126  
"Elf5",167.199670957148,0.407359950067317,0.843484136849602,0.48294915  
3719475,0.629131839489754,0.745204580910712,0.119803132723992  
"Cat",25998.1118461842,1.13929955354359,0.427963376861427,2.6621426391  
644,0.00776449676976436,0.0278343372940074,4.08038410885758  
"Pamr1",1095.31973002516,0.0399274212641117,0.275911670934312,0.144710  
882033031,0.88493914698352,0.928212571299406,0.00297437362381425  
"Trim44",5156.64917564267,-0.1365951364198,0.170152978359555,-0.802778  
404096794,0.422102826541624,0.565297129741644,-0.0779143838811098  
"Api5",3649.10388329872,-0.111167773990278,0.0935909651586198,-1.18780  
454717898,0.234910422506511,0.372896150617271,-0.109662041473754  
"Ttc17",1090.14491558977,-0.0206776974678705,0.126451155074956,-0.1635  
23199575468,0.870106508370901,0.918485014358499,-0.00175821820151089  
"Hsd17b12",4953.40884259416,-1.49468040525049,0.573696991664563,-2.605  
3481663094,0.00917809424158275,0.0316611327503014,-5.16063138888081  
"Ext2",2137.14679953348,-0.259879792032741,0.179863772450694,-1.444870  
12860793,0.148494368208659,0.265944997826071,-0.344201887997026  
"Gatm",18026.8750825288,1.48795387049937,0.641492939692314,2.319517142  
64081,0.0203670127203353,0.0582708751314889,4.22973635435961  
"Sema6d",907.520186650449,-0.94676512345997,0.215757376598216,-4.38810  
083060585,1.14344764905838e-05,0.000189494617453548,-8.11486582904022  
"Myef2",2269.5263040012,0.116443200667305,0.177814931227561,0.65485614  
6575707,0.512560377120324,0.646687086391359,0.0507567456998023  
"Slc12a1",28975.233607059,2.00181787477264,0.640004081749781,3.1278204  
8092512,0.00176107709064945,0.00907454764381448,9.41311165233122  
"Dut",1083.1065875517,0.277700757204174,0.235656646487921,1.1784125817  
9157,0.238632164202754,0.376719660591891,0.271106467804259  
"Fbn1",1628.39264257745,-1.63409963559435,0.31130967046224,-5.24911299  
147245,1.52833315991225e-07,6.34030637275935e-06,-19.5578578818478  
"Cops2",3758.06634900666,-0.0775648563410019,0.181987276313522,-0.4262  
10325865724,0.669954593965851,0.776621562018202,-0.019608558369984  
"Galk2",2205.81125353011,0.482872808361617,0.229218546314121,2.1066044  
4421407,0.0351518811957654,0.0886846337500367,1.16984081143197  
"Fgf7",73.4257486097854,-1.51453789398415,0.450624079547385,-3.3609786  
13272,0.000776668391513757,0.00484281429412704,-8.0728796363177  
"Fam227b",0.346678464072157,3.05774640292831,4.63393282306745,0.659859  
890006826,0.509343745950438,NA,NA  
"Meis2",2503.63504901005,-0.333624558178573,0.241159874225267,-1.38341  
653747478,0.166537182649934,0.289587263650086,-0.413460447391402  
"Cd82",5952.13234934955,0.0139290111411907,0.190639997595649,0.0730644

739659222,0.941754811737815,0.963817152236969,0.000513335297934348  
"Tspan18",1087.19770757328,-1.77884839416374,0.564112991206612,-3.1533  
5477447321,0.00161405516016306,0.00851944978691371,-8.47693039771911  
"Slc28a2",522.671708299594,-2.62625034795367,0.508971133010593,-5.1599  
2003793859,2.47055338975798e-07,9.10602079272232e-06,-30.4817709432912  
"Syt13",225.066357601422,-0.974829201416998,0.373396531906605,-2.61070  
770111176,0.00903550854485906,0.0312643026810403,-3.37805449904276  
"Chst1",1081.43824200558,-1.5023561999545,0.390445481601497,-3.8478001  
9426081,0.000119183192315325,0.00114081192133737,-10.1799882339403  
"Pex16",2202.73212125783,-0.832984205169298,0.522599251845717,-1.59392  
536867851,0.110952751642011,0.213243642337697,-1.28722707383378  
"Mapk8ip1",1449.4820663919,-0.388316372225892,0.344354265274449,-1.127  
66534753506,0.259461277462175,0.400742711340105,-0.355090344029911  
"Duoxa1",40.3562935623838,-4.36294005211698,1.21014304688889,-3.605309  
35853699,0.000311781299873149,0.00238023170905507,-26.3545899889993  
"Duoxa2",1.29500572304148,-3.52149588618111,2.26526281155713,-1.554563  
94207983,0.120049957000213,NA,NA  
"Sord",33641.5880390637,2.05102525825727,0.595726435532101,3.442897840  
22309,0.000575516673507739,0.00384032310063446,11.4082101792432  
"Terb2",0.100532412451372,0.4.78471990596383,0,1,NA,NA  
"Creb3l1",535.13298012838,-1.29176255448112,0.246217798427524,-5.24642  
232499433,1.55081186747944e-07,6.37221589562125e-06,-15.4540830691678  
"Patl2",2.634769017546,-0.0357985970667125,0.822545796880712,-0.043521  
706879385,0.965285661330556,0.97904389433121,-0.000758171383829531  
"Eif3j1",2922.15193163648,0.081060324365436,0.127792667115435,0.634311  
233931867,0.52587772651526,0.658546172870555,0.0338605707348626  
"Frmf5",18.8839454643706,-0.796349585311385,0.462378019970706,-1.72229  
11793295,0.085016784765434,0.174251789063012,-1.39142496821144  
"Mdk",3480.66616976706,-0.0362157421810254,0.369243491184003,-0.098080  
9223336539,0.921868036248935,0.951892335475387,-0.00178555717954954  
"Wdr76",288.111295318127,-0.659060752772643,0.215921044419723,-3.05232  
29199073,0.0022707766854283,0.0110220572099778,-2.9709515045727  
"Harbi1",546.576129714143,0.256291926904241,0.172831301549832,1.482902  
25558676,0.138100382085767,0.251628936539416,0.353631536842728  
"Atg13",1881.49867465435,0.00995632334969941,0.125823965002332,0.07912  
89906458987,0.936930024603118,0.960836919719902,0.000397760921707279  
"Hypk",2072.08239950207,0.185095459365594,0.193589577989733,0.95612305  
8315725,0.3390100665016,0.483577311921004,0.134480009554139  
"Ell3",372.782596625573,1.55093520826878,0.379341049113978,4.088498231  
05428,4.34174857211985e-05,0.000519979357567822,11.7277400228714  
"Arhgap1",3146.66625930985,-0.411367344850665,0.131026282124344,-3.139  
57885533436,0.00169190872366672,0.00883708446130557,-1.94527318817152  
"Pdia3",22949.2983476041,0.109560857192568,0.178876409753171,0.6124947  
23836135,0.540210487757115,0.670935988934851,0.0437237159497237  
"F2",29.1571049302679,1.08420543325515,0.543375541619095,1.99531511857  
258,0.0460085220045735,0.109000505716303,2.4030359115996  
"Lrp4",886.817505221699,0.10562655509745,0.220954014719191,0.478047684  
40931,0.632616266210023,0.747878006339843,0.0306861416903384  
"Map1a",307.964328400875,-1.34839926731635,0.31194054535871,-4.3226162  
4011007,1.54189799090625e-05,0.000237097216298817,-11.2551430323076

"Arfgap2",3769.30662068227,-0.408312910939595,0.157797765800905,-2.58757092578083,0.00966552949053311,0.0329357731573601,-1.39365194615174  
"Paccin3",1718.22917869869,0.0442576143120988,0.137784464403297,0.321209031103508,0.748051988659198,0.836178753102684,0.00791825676285913  
"Adal",608.089630277274,0.282255301651442,0.161653061627646,1.74605602151596,0.0808012177163387,0.16754888259419,0.504243489091004  
"Hao1",2.83134070608883,0.133758650365933,0.966685068571694,0.138368383576634,0.889949282881567,0.931963645610656,0.00942483138586029  
"Tubgcp4",1802.91748873021,0.0620995922343712,0.154726115593406,0.401351717492595,0.68816119180508,0.790862131192705,0.0145705281293999  
"Lamp5",0.105552103896451,0.877046898575489,4.78471990596623,0.183301617610232,0.854561365232847,NA,NA  
"Ubr1",1981.15867670316,-0.0992299033407562,0.124020464542774,-0.800109108658693,0.423647584212278,0.566821696652259,-0.0563338573156822  
"Snap25",8.2041601378393,-0.710889029286131,1.60878732285581,-0.441878810944512,0.658576904462202,0.767631066666907,-0.187991790948273  
"Mkks",1053.66911426989,0.345894090370373,0.186154769216284,1.85809953635137,0.0631548806774738,0.13871734408577,0.68325044646842  
"Jag1",2840.31473389087,-0.555313485723453,0.123244329688508,-4.50579338722498,6.61254052407843e-06,0.000122674895469535,-5.00113816349254  
"Slx4ip",339.425913506761,-0.688863551944543,0.146267802041724,-4.70960486401539,2.48197492129753e-06,5.66006397841629e-05,-6.73673440305641  
"Mtch2",6681.33850164246,0.0311594740070445,0.361127397894378,0.0862838826096434,0.931240750504381,0.957159009853384,0.00136434084037076  
"Cdan1",1217.56941942521,0.119760991059901,0.162133929414054,0.738654712759461,0.46011669199695,0.599618143593097,0.0612532263948401  
"Haus2",614.031101940875,0.0599811780421906,0.138102885049245,0.434322411300838,0.664054331605259,0.772267942171891,0.0155005587890747  
"Lrrc57",719.12211326819,0.112290089064329,0.116962624769131,0.960051035841364,0.337029529801561,0.4814566467925,0.0820772154731005  
"Snap23",2659.3105982427,-0.197688523159547,0.117546088211953,-1.68179584847678,0.092608434041817,0.186075767410073,-0.332433284765105  
"Zfp106",6404.40569862466,0.0294810883028533,0.138922122895862,0.212213056411129,0.831940821168005,0.892654640167043,0.00334774013679552  
"Vps39",1985.58012751773,-0.0732844160373234,0.151642604733431,-0.483270622831549,0.628903596107277,0.74497948462331,-0.0215748293659589  
"Ehd4",3956.04912150905,-0.720288297589878,0.176667416721205,-4.07708626161975,4.56035776512552e-05,0.000540205684716995,-5.41913265156593  
"Itpka",42.7566538480152,-3.14737126298942,0.807283731073131,-3.89871756588676,9.67034893216945e-05,0.000964956312586693,-21.853544902727  
"Ltk",207.748765679937,0.441524257130485,0.407683339720299,1.08300784975271,0.278804938828548,0.422562290119642,0.380337123914116  
"Tyro3",598.050188670296,-1.00840466969592,0.290355401816979,-3.47300123705481,0.000514672983053104,0.00354050170985102,-5.69091847872127  
"Ubox5",416.684746186618,0.171333120186799,0.126492540553782,1.35449188890275,0.175579499392038,0.301864833713601,0.205218687762458  
"Oxt",3.28454661051291,2.76367856019497,1.13366680204168,2.43782260821057,0.0147760230082006,0.0457161054607894,8.52679024677095  
"Ptpra",3731.81084194366,-0.110869636576505,0.130028621602823,-0.852655632351158,0.393850301798794,0.538293367760611,-0.0686672839450112

"Rtf1",4317.5442308123,0.312559016063458,0.202540147245968,1.543195363  
05995,0.12278338203931,0.230438962653044,0.458764514376195  
"Ndufaf1",1193.04019953374,0.341699227031951,0.335524528361448,1.01840  
312152634,0.308486419362665,0.453438990179663,0.270248056229011  
"Nusap1",230.848835210827,-0.0815927973347796,0.353232951743631,-0.230  
988634927803,0.817323631316621,0.882982372804105,-0.0101542270084333  
"4930402H24Rik",6170.63009976634,-0.0836073633964207,0.237960362809628  
, -0.351349957653695,0.725325820103506,0.819137146850748,-0.01667998274  
89419  
"Atrn",3334.54536673879,-0.692207095094962,0.33207717562339,-2.0844765  
792636,0.0371168384399345,0.0925689582888007,-1.64731542589809  
"Chac1",50.6695619168875,-0.609092645981673,0.418917667154712,-1.45396  
743498222,0.145955334934848,0.262506883180487,-0.814647999133483  
"Dll4",902.510262459912,-0.357412320133895,0.194822846166338,-1.834550  
3474923,0.0665723413717933,0.144401770171012,-0.691648522081367  
"Spint1",3977.78563132886,0.413508034393327,0.139422051433749,2.965872  
54412778,0.00301825545324935,0.013600458267013,1.77711354448095  
"Gfra4",122.845821439607,0.0925100292532128,0.168573321864225,0.548782  
145538567,0.583154964594413,0.707324412438034,0.0320330648903652  
"Ppp1r14d",38.0751766728078,1.29305851945262,0.344035171188394,3.75850  
676832266,0.000170930415687109,0.00150058588251565,8.40733674642449  
"Adam33",392.139827849686,-0.96088199785567,0.277240650999398,-3.46587  
700754518,0.00052850498565672,0.00361698498081247,-5.40218859218677  
"Siglec1",304.242532342693,-1.62892659770618,0.397439696623296,-4.0985  
5032485626,4.1574585184551e-05,0.000502555029093847,-12.3730094688755  
"Rad51",130.132367992787,-0.647052999114494,0.376733227809343,-1.71753  
631310152,0.0858812254465854,0.175488590836043,-1.1259894953081  
"Rpusd2",80.9204933400393,-0.0607969783109568,0.218967886900863,-0.277  
652486725063,0.78127913700517,0.858750809703298,-0.00925795061544412  
"Kn11",54.0467627346497,-0.730150946911126,0.425321001682358,-1.716705  
6035865,0.086032975788577,0.175761835910067,-1.26945898608327  
"1700037H04Rik",2484.33606193212,-1.75643871977081,0.622254893625819,-  
2.82269972926402,0.00476211494828915,0.0191328492193987,-6.94908381157  
905  
"Spef1",996.519769135272,-0.180944472274194,0.145093598035853,-1.24708  
791237972,0.212365264596673,0.346646959322388,-0.191701336206641  
"Cdc25b",906.340013141638,-0.236800004198947,0.139125289045258,-1.7020  
6298095751,0.0887435625318136,0.180129292342838,-0.405894244767846  
"Knstrn",265.526025445275,-0.427619784921818,0.354952487435051,-1.2047  
2401253439,0.228309862926181,0.364764479460397,-0.431256005043683  
"Ivd",13238.4028318864,0.747563878932086,0.302442667335366,2.471754020  
41784,0.0134451992803007,0.04255064041021,2.36010429869236  
"Smox",779.769791368192,-0.456519659023058,0.22086746365629,-2.0669393  
8285762,0.0387398661591469,0.0956865787173977,-1.07130429054107  
"Adra1d",46.9916730540754,-1.83064086766957,0.537957532028181,-3.40294  
681025801,0.000666632569130873,0.0042997028888236,-9.97554534045469  
"Prnd",113.991461790617,-1.2183294149484,0.494344377739767,-2.46453579  
692526,0.0137190858945272,0.0432629365633983,-3.82611355059919  
"Rassf2",1762.45004851847,-1.59812047944851,0.315131248377357,-5.07128  
533802154,3.95137798998631e-07,1.32150888591343e-05,-17.9535272390903

"Slc23a2",1487.71590495399,-0.845818561894649,0.256848634174762,-3.293  
06233070777,0.000991025017989873,0.00583247986742123,-4.35115542855834  
"Tmem230",1202.61467768378,0.00481268517875591,0.157272683383155,0.030  
6008969595249,0.97558782681582,0.984729070106894,7.40611194028089e-05  
"Pcna",2850.65562111621,-0.468295722045185,0.21610609286689,-2.1669713  
9739429,0.0302370351419463,0.0791111392507979,-1.18802016147581  
"Fsip1",24.1981917512708,1.10848278695968,0.510388731256026,2.17184024  
46539,0.0298677149540049,0.0784007412726424,2.82211059939389  
"Gpcpd1",1904.60710136841,0.15645520712799,0.130810452721989,1.1960451  
4679346,0.231678941567347,0.368697029275232,0.156107881429194  
"Rasgrp1",561.076413646184,0.0038317899803357,0.39909145443919,0.00960  
128295836402,0.992339402262036,0.995044158668305,1.90369542810793e-05  
"Fam98b",1780.82752730069,-0.180066370425136,0.134448197122671,-1.3392  
9925635851,0.180473270746963,0.308196037130405,-0.211941577837681  
"Chgb",9.33763017481655,0.0218249940742551,0.773024513868265,0.0282332  
496353077,0.977476118413618,0.985665564585681,0.000315112885332461  
"Spred1",2114.75705824752,-0.365750164342616,0.151317173215952,-2.4171  
0941705629,0.0156443136636367,0.0476464898178052,-1.11332386588985  
"Mcm8",164.507190389514,-0.190525922755906,0.178817559976172,-1.065476  
58284396,0.286660317018038,0.430757492647987,-0.160462839176472  
"Tmco5",0.772349650284562,3.01273139185741,2.12397438723875,1.41844054  
709816,0.15606218472495,NA,NA  
"Fermt1",2429.8096773791,0.10224520464868,0.332279267352766,0.30770864  
9604464,0.758304037445848,0.843242393185761,0.017432891837966  
"Crls1",1904.98166075422,-0.235236632479627,0.424170027449739,-0.55458  
0987001729,0.579181296794458,0.703965219429095,-0.0825742513726428  
"Bmp2",508.411508352105,-1.46481106129827,0.310446146480108,-4.7184063  
2556259,2.37699373862633e-06,5.44613677035679e-05,-14.3815427684306  
"Slc27a2",93294.28226768,2.36887361684213,0.701592339904053,3.37642457  
323021,0.000734345036707945,0.00463674207439492,12.7297187234944  
"Hdc",52.2427942938454,-1.25169065605858,0.369172770014138,-3.39052811  
508999,0.000697580989442589,0.00445073106418574,-6.77751301349654  
"Gabpb1",940.070323418287,-0.163743718377229,0.0992356351285391,-1.650  
04958314755,0.098932795248439,0.195677788776026,-0.267112820199541  
"Usp8",4221.72434282453,0.348188809619108,0.151497531009017,2.29831342  
662861,0.0215439568202116,0.0609583616427929,0.974080563917687  
"Usp50",64.2055618777441,0.590079002952424,0.433977449568045,1.3596996  
884049,0.17392497678071,0.299760381620286,0.710910572866001  
"Trpm7",4729.00712412451,0.967161018458043,0.174827886277519,5.5320752  
2581832,3.16464118799459e-08,1.92224840758625e-06,12.72978784343  
"Sppl2a",4972.34783261034,-0.244289328479324,0.152991794547904,-1.5967  
479118812,0.110321911011071,0.212240416467081,-0.378657157530749  
"Stard7",5008.45533352008,0.59302278041697,0.17945761536283,3.30452836  
575359,0.000951363481073771,0.00565194550700073,3.06934089102166  
"Dusp2",264.359965897948,-1.39862986192402,0.440758628418136,-3.173233  
08438373,0.00150751445225824,0.00807736103053892,-6.73956382016425  
"Fahd2a",2199.99607114849,1.57231708234937,0.293209260684271,5.3624400  
4940363,8.21052224295289e-08,3.93338483275419e-06,19.569074479418  
"Mrps5",2704.15444523809,0.523310612784341,0.220161695451431,2.3769376  
0357049,0.0174570408459981,0.0518078207633594,1.54911148663141

"Mal",11073.4318678655,0.328730943549607,0.247225190993101,1.329682231  
12337,0.183622991734956,0.311735402076463,0.383168959154214  
"Prom2",1576.95678942666,-1.41723718504479,0.591122450441692,-2.397535  
71190845,0.0165057719195176,0.0496650526059805,-4.25518911518987  
"Mall",139.111516350466,-1.55483071100151,0.454881556064658,-3.4181001  
4117281,0.000630599005614178,0.00412459557580182,-8.53724473130649  
"Nphp1",1170.14911160014,0.687118765100242,0.127558335139026,5.3867022  
0453529,7.17621869637913e-08,3.53839172465398e-06,8.62460359747363  
"Bub1",88.6619040647329,-1.16600468936332,0.491649593730274,-2.3716173  
1491842,0.0177104233520104,0.0523288126257765,-3.43995653630869  
"Acoxl",10.4442162549795,-0.636395644027219,0.66459205637852,-0.957573  
353336559,0.338277941202592,0.482921606206482,-0.463232990358851  
"Bcl2l11",880.003455636892,-0.614110573070751,0.167367803134369,-3.669  
22766248965,0.000243284354087667,0.0019671799592104,-3.82661771017451  
"Ndufaf5",569.978262419382,0.242218758026037,0.285212411724019,0.84925  
742383335,0.395738066430413,0.54012655561814,0.149195081120538  
"Fbln7",1413.27014333081,-1.03140674271164,0.43127136474225,-2.3915493  
2840965,0.0167774292690483,0.0502266721768623,-3.08515320893885  
"Zc3h8",386.283960413856,0.115451422410832,0.126872646431194,0.9099788  
30412781,0.362833674225143,0.507753605113173,0.0782482381048978  
"Ttl",753.008727497267,-0.621888947073586,0.216794073706918,-2.8685698  
6650988,0.00412332120307539,0.0171897619879333,-2.5270092350623  
"Polr1b",1266.79179425889,0.0627238548253947,0.151935634009283,0.41283  
1757568882,0.679729882233099,0.784419442002853,0.0152300669496029  
"Slc20a1",2973.7918831563,-0.00495157058103183,0.24758682174414,-0.019  
9993301184215,0.984043906947482,0.989729087881048,-5.11201231531977e-0  
5  
"Il1b",392.175002640596,-2.01246238229307,0.523900604800849,-3.8413057  
054173,0.000122381585006442,0.00116409250289429,-13.5958204560565  
"Il1a",13.1716859654522,-0.75660784989088,0.542079789963449,-1.3957499  
6873043,0.162789801250469,0.284989271019361,-0.94977266744036  
"Pdyn",3.79118165003165,-0.115215658720637,1.2803914020269,-0.08998471  
75935787,0.928299359149946,0.955900760744951,-0.00519636194054693  
"Tgm3",7.4310627117744,-1.52071437736006,0.784200466454645,-1.93919086  
051451,0.0524781020853749,0.120648276672638,-3.21612199084073  
"Tgm6",0.247954256230582,-0.0561589643304147,4.78471990595559,-0.01173  
71477190364,0.990635326061519,NA,NA  
"Snrbp",4011.03633922759,-0.527404708183559,0.324895719265814,-1.62330  
457715899,0.10452431158054,0.203946922211882,-0.838518374449639  
"Nop56",3190.1191634092,-0.00118810898136493,0.25125816872393,-0.00472  
863822656591,0.996227106625734,0.997451786181699,-3.03141971921385e-06  
"Idh3b",11349.1558504617,0.168067644355735,0.370895307547099,0.4531403  
90120445,0.65044765290899,0.761890444336146,0.0457064173069534  
"Cpxm1",1883.55701353139,-1.09965073374009,0.420712582625344,-2.613781  
42502422,0.00895463027220411,0.0310575110419134,-3.81789343555324  
"Vps16",2839.26434437087,0.394486676286014,0.211613031522612,1.8641889  
5588602,0.0622951737550087,0.137293014341038,0.783307674294826  
"Lpin3",822.989621536733,0.24461831933443,0.203112206819236,1.20435065  
506493,0.228454075710762,0.364935078503067,0.246584025263774  
"Otor",0.0979576720737022,0.875197899124178,4.78471990596623,0.1829151

79221434,0.854864572537654,NA,NA  
"Pcsk2",12.9536635787751,-0.516320416802662,0.66812882344822,-0.772785  
724372626,0.439649203349482,0.581489980400399,-0.279929071161804  
"Bfsp1",72.2152712048549,-0.721364296128814,0.338622370218129,-2.13029  
132028145,0.0331475696991722,0.0849068988432027,-1.77902857698292  
"Rrbp1",14382.8570373212,-0.184733879620908,0.170857127053468,-1.08121  
845899409,0.279599948844549,0.423329694251515,-0.15879797899258  
"Snx5",5044.78268365309,-0.155808927254388,0.132100153806775,-1.179475  
74445895,0.238208789593091,0.376324337991094,-0.152272673254367  
"Mgme1",726.107043536533,-0.106782500026541,0.185560665488581,-0.57545  
8703736498,0.564981112028024,0.692644567194389,-0.039214623930777  
"Kat14",1711.07610380109,0.490933329853312,0.145972736830651,3.3631850  
7491481,0.000770486903514235,0.00481196465237686,2.61993926964392  
"Polr3f",1009.31797332454,0.199043124648029,0.11247688371671,1.7696358  
4045722,0.0767878242965763,0.160990214853188,0.363534690299085  
"Rbbp9",2055.17451237823,0.229202977841928,0.172534469385248,1.3284474  
6130204,0.184030329147534,0.312231392216994,0.266794724256797  
"Sec23b",3148.41550442813,0.426475070411343,0.164929168696745,2.585807  
43346559,0.00971511905019018,0.033046997774007,1.45420516749147  
"Dtd1",825.779801180154,0.260735712743936,0.199908551481104,1.30427493  
377432,0.192139858622264,0.32207212546569,0.29540828691435  
"Xrn2",2104.07762757878,-0.2329210141158,0.127282059650961,-1.82995949  
904116,0.0672559952743258,0.145480074978789,-0.44900559906548  
"Nkx2-2",2.95792332305356,-0.157151142910593,1.5133111512165,-0.103845  
889712942,0.917291648584775,0.949331351328659,-0.00817144815209777  
"Cd93",2407.43173085569,-1.42584984198222,0.303185801828294,-4.7028912  
0857229,2.56503109843636e-06,5.81782255149808e-05,-13.9048868110246  
"Napb",404.761450697291,0.640721114698052,0.245219819959679,2.61284391  
613779,0.00897922995480346,0.031135875094924,2.22291436556161  
"Gzf1",1458.35009060064,-0.210467815454614,0.230023786106075,-0.914982  
832938663,0.360200642482826,0.505411062689273,-0.143619700415628  
"Cst8",2.25248769806398,1.16433646322638,1.04262880078132,1.1167315370  
0901,0.264109129281994,0.405991785141937,1.04955891462796  
"Cst12",10.105980448891,-0.634975020086856,0.758758276493617,-0.836860  
749672755,0.402670845182102,0.546479859355511,-0.383688625153072  
"Cstdc2",0.922382400264741,-1.65404646978928,2.44516977192571,-0.67645  
4653079825,0.498752027750951,NA,NA  
"Cst3",22046.9380675171,-0.734625532859875,0.256635263060093,-2.8625276  
3590583,0.00420276607311255,0.0174166913695108,-2.97547308587841  
"Acss1",5374.3018517381,1.0005046246366,0.277918106585217,3.5999979883  
636,0.000318219642172377,0.00241896552946472,6.02745536574717  
"Gins1",186.634234881373,-0.545991251048909,0.213774897430107,-2.55404  
754071941,0.0106478717146594,0.0356232331318512,-1.82074827627753  
"Nsfl1c",5925.16030922651,0.17179553588579,0.105353739069159,1.6306543  
7832268,0.102963268086035,0.201746337166266,0.275000695166668  
"Sdcbp2",140.234765504985,-1.96736676113163,0.506165119868261,-3.88680  
824479505,0.000101570925893825,0.00100325730145786,-13.5836902375662  
"Snph",31.1140644440064,-1.07350306190989,0.466157130890941,-2.3028781  
3008064,0.0212857009763966,0.0603590165267278,-3.01380073781174  
"Fam110a",556.565632074926,-0.274025625109893,0.209724538289788,-1.306

59782276529,0.191349336468295,0.321133530939818,-0.311265230240758  
"Angpt4",88.5182058707802,-1.5160336053876,0.410622606041193,-3.692036  
39323139,0.000222465621029351,0.00184032018618171,-9.5477002542764  
"Slc52a3",1170.72788027559,0.638384331848396,0.290074592965464,2.20075  
920928518,0.0277530747111,0.0740867265494289,1.66140728374531  
"Tbc1d20",3725.13238269372,-0.413162709985949,0.240413799649734,-1.718  
54823054208,0.0856966651219581,0.175221641835984,-0.719606971785722  
"Rbck1",4142.23488968524,-0.152981675418177,0.126731795812824,-1.20712  
939035538,0.227382317824395,0.363759471032166,-0.154704619854909  
"Tpx2",272.498174823946,-1.0565824442537,0.388858006252195,-2.71714206  
025231,0.00658483375164377,0.0245677551644757,-3.91603313242058  
"Mylk2",14.4194537294716,-0.905601714192258,0.641194920628953,-1.41236  
570199893,0.157842309888662,0.278693231749447,-1.15703626133226  
"Pdr1",3306.0759154009,-0.0649039060444214,0.127246758035894,-0.51006  
3337143043,0.610007089538085,0.729822558250818,-0.0204417347820907  
"Ccm2l",871.621944153954,-0.179753194487445,0.239729054371515,-0.74981  
8143481582,0.453364239832792,0.593866036161221,-0.0936696616864218  
"Kif3b",1354.10153084676,-0.384475762670008,0.130878942671548,-2.93764  
416812934,0.00330716365589469,0.014555993143645,-1.62623714391987  
"Dnmt3b",249.315063103692,-0.228678082768271,0.227720671651199,-1.0042  
0432238378,0.315280139137274,0.460555300974729,-0.177299226585765  
"Mapre1",5161.67328083255,-0.400667297145571,0.163069747997693,-2.4570  
3020986602,0.0140090905517362,0.0439886736259378,-1.25161375655261  
"Bpifb2",0.148413830377466,-1.23093098304697,4.774987514986,-0.2577872  
67334998,0.796571091654078,NA,NA  
"Bpifa1",0.68029147470362,0.41331334129593,2.67584671468474,0.15446076  
9007325,0.877246441745702,NA,NA  
"Bpifb1",0.339050003714232,-1.6517244729272,4.75955277413097,-0.347033  
545232364,0.72856611753449,NA,NA  
"Cdk5rap1",522.891775526537,0.138574253407505,0.276243099102377,0.5016  
38787929139,0.615921629781394,0.734998624295786,0.0426651628626266  
"Snta1",2604.44228710681,0.548735352912222,0.126596182152026,4.3345331  
8721145,1.46069751987393e-05,0.000226396504312416,4.60565799405484  
"Necab3",45.8550448539657,-1.53951726722723,0.470648698719562,-3.27105  
391221862,0.00107147482009428,0.00621034959637286,-7.82311563194836  
"E2f1",409.718692740185,-0.535913543235636,0.253155805886841,-2.116931  
67122221,0.0342656472689393,0.0870844095998148,-1.30809925893529  
"Fam210b",789.596684743707,-0.79070510290143,0.377743742971367,-2.0932  
3150313933,0.0363284938148821,0.0910102752669371,-1.89514844096793  
"Aurka",130.393916578286,-0.626869591665028,0.341589184610601,-1.83515  
64390999,0.066482513407032,0.144230652695516,-1.21383360920107  
"Cstf1",1361.87501796143,-0.061937376593903,0.111254436313185,-0.55671  
8263526563,0.577719936618581,0.702794068142569,-0.0218447777731321  
"Pkia",1178.00910946929,0.0672885856216768,0.296223471481448,0.2271548  
07433586,0.820303367567757,0.884736976481698,0.00824048855430885  
"Stmn2",117.098739049309,-0.420641066177693,0.383618582292648,-1.09650  
857803547,0.272856271474699,0.41549491395867,-0.369442699071979  
"Rtf2",3332.85848374981,-0.467751094226283,0.265704474260911,-1.760418  
58356879,0.0783368607296687,0.163615752176731,-0.846739203145432  
"Fam209",9.13099480447347,-1.17801301568243,0.647178792044628,-1.82022



808868743,0.0687242772619639,0.148064746746273,-2.25012928506702  
"Tpd52",5771.90045698915,0.34439428628652,0.198640351158759,1.73375794  
131209,0.0829610410748394,0.170900621117509,0.608432105697781  
"Pag1",825.931265312614,-0.678768813519731,0.22899639390088,-2.9641026  
3042628,0.00303567024657429,0.0136570139519394,-2.91429529007642  
"Rae1",1794.5566630666,0.138006951736502,0.0950618927479916,1.45175893  
03882,0.146568647113794,0.263294221616431,0.184167952879669  
"Rbm38",649.527198715159,-0.337335312469539,0.203657517343044,-1.65638  
527303329,0.0976438215458893,0.19369816181725,-0.553720464941282  
"Pck1",58988.0498830491,0.983659823899716,0.740147094639599,1.32900585  
7111,0.18384603751988,0.312053109884488,1.14555240864068  
"Zbp1",561.660966945378,-1.31294338709397,0.475166131397525,-2.7631249  
3744542,0.00572508475468923,0.0219912731573937,-5.01164877954001  
"Ankrd60",4.44623216616325,-0.603238113414486,0.784940856328304,-0.768  
514097019025,0.442181818851659,0.583643559123388,-0.324822506051626  
"Rab22a",3304.39924457911,0.0168078550261694,0.0888142154844431,0.1892  
47351164335,0.84989895726333,0.904351117044336,0.00168982124057864  
"Zdbf2",11.6669647478343,-1.4184776373833,0.54118719119743,-2.62104805  
962753,0.00876599033551247,0.0305522681314343,-4.94809873865834  
"Stx16",6452.79624704147,0.0574771236422381,0.183628366541613,0.313007  
868690118,0.754274683979708,0.840343282568787,0.00999784682841239  
"Gnas",32246.7858203592,0.280014913635585,0.198078942323186,1.41365311  
401306,0.157463778039798,0.278176021040137,0.358279417020414  
"Edn3",466.727381528325,-0.163464061704084,0.495913575990093,-0.329622  
074527255,0.741685540918126,0.831876263309317,-0.0300890866734437  
"Phactr3",8.41409195598093,0.214455142504781,0.616850092509467,0.34766  
1684919808,0.728094274666188,0.821454818160013,0.0421786819070863  
"Fabp9",0.135890711193464,-1.02856587253889,4.78024249005756,-0.215170  
229267282,0.829634600901222,NA,NA  
"Fabp12",2.1740778612296,1.77464176218921,1.23556118780742,1.436304231  
39013,0.150915790529667,0.269280472986238,2.32833317225027  
"Impa1",3879.12432089042,0.688049807348877,0.194241107513199,3.5422461  
0926974,0.000396735134125735,0.00287487747858919,4.02629217250306  
"Fabp5",3518.57507479937,-2.8302058430273,0.658246606808747,-4.2996132  
6614118,1.71096414684595e-05,0.000253884162368359,-23.4302339284099  
"Snx16",510.951923196071,0.336038373483843,0.119431578814664,2.8136475  
8650067,0.00489828952898608,0.0195692834632513,1.32190577511215  
"Chmp4c",906.553430238155,0.0462674891100771,0.188899068617248,0.24493  
2330523161,0.806508827851619,0.876948921651031,0.00607522346708451  
"Ptpn1",3163.67284570139,-0.339531957728286,0.161050674389903,-2.10823  
058651888,0.035011048794611,0.0884141211497636,-0.82361067622291  
"Nfatc2",623.453204005937,-0.443590130359675,0.34856305808946,-1.27262  
519668916,0.203151073109743,0.335311912595765,-0.48470831736175  
"Atp9a",2512.63158983044,-0.512347394681571,0.321907320407002,-1.59159  
907899512,0.111474817168577,0.21407820202432,-0.789739396146215  
"Sall4",1.16238332585273,-0.941160310680961,1.91516311394494,-0.491425  
666998315,0.623125414229042,NA,NA  
"Lrrcc1",1319.0309853562,0.334012880623575,0.205054860323969,1.6288952  
1416788,0.103335203410745,0.202251535444962,0.533833792207487  
"Zfp64",640.235271669366,0.088378003051099,0.12563542421971,0.70344812

0623561,0.48177652694908,0.619308987503505,0.0423464048974473  
"E2f5",1318.85046599616,0.53225596960469,0.150014893100396,3.548020857  
15905,0.000388137484274208,0.00282595394636987,3.12376200533832  
"Car13",359.05539939021,-1.97654788874268,0.389988257328895,-5.0682241  
1085001,4.015444600585e-07,1.33285410705371e-05,-22.1879416660718  
"Car1",7.8854946735959,-1.54611744318134,1.1514956955781,-1.3427036237  
4661,0.179367960861512,0.306707295890264,-1.82729655655118  
"Car3",40530.0399155754,-3.67576044076961,1.16384185737776,-3.15829888  
525528,0.00158692764076399,0.00839899976645392,-17.5688213946351  
"Dok5",16.5067963017196,-1.43463926700143,0.65488639712992,-2.19066890  
576568,0.0284757607936075,0.0756327998847241,-3.70404523959753  
"Car2",9892.04584556951,1.27039102215806,0.465408013781046,2.729628593  
709,0.00634057147985386,0.0238618920506062,4.74551081319681  
"Psm7",6367.6681449478,0.229715878062627,0.123360463190736,1.86215155  
262061,0.062581731120164,0.137737734888922,0.455389646552119  
"Ntsr1",0.255630164157412,1.45079204318902,4.75720974231816,0.30496701  
2550104,0.760391276440168,NA,NA  
"Mrgbp",1425.23306524022,-0.0690756065187204,0.143473295963898,-0.4814  
52705568999,0.630194785287306,0.745919864234317,-0.0202486233310889  
"Col9a3",100.086037407012,-1.33783413782539,0.350773214219775,-3.81395  
751896603,0.00013675898627174,0.00126977462586971,-8.92190329203994  
"Gid8",1570.86217382129,-0.121291637237247,0.149775770790616,-0.809821  
48579165,0.418042782023037,0.56120890690479,-0.0700655769911342  
"Nkain4",51.2846934686531,-2.14705097886648,0.485399391866272,-4.42326  
672600776,9.72195943606321e-06,0.000167602798483077,-18.666275861071  
"Arfgap1",2834.98022283833,0.19647219792935,0.265537463620806,0.739903  
873639154,0.459358323819592,0.599061507446619,0.100670586477688  
"Chrna4",1629.78111553044,1.61291896946104,0.802224146247254,2.0105589  
902849,0.0443720594178519,0.106200308728484,3.61685508325901  
"Srms",53.5981623790531,-0.483762440583704,0.311118892713866,-1.554911  
80996397,0.119967074289261,0.226417385973479,-0.718568704085503  
"Helz2",2451.52974312527,-0.81283793443937,0.208139738631303,-3.905251  
05770035,9.41276125310511e-05,0.000944570349526729,-5.66123770639205  
"Stmn3",12.0145305004698,0.0876959688201435,1.08240186474182,0.0810197  
87268254,NA,NA,NA  
"Zgpat",2495.94310074311,-0.224893097278964,0.183722149882661,-1.22409  
354246398,0.220916941791912,0.356694147984325,-0.231837029853501  
"Zbtb46",1470.2996321605,-0.955956955024745,0.173564337976465,-5.50779  
593417613,3.63354257402915e-08,2.10227932072464e-06,-12.4967362159991  
"Oprl1",4.29995514971442,-0.627333085886937,0.821940565101484,-0.76323  
4122420373,0.445323782210352,0.586502540139127,-0.334731308882489  
"Pcmd2",4072.44784547672,0.292339679404193,0.103019811660676,2.837703  
49306302,0.00454393717889016,0.018438644560666,1.16740196212723  
"Raly",7485.9182017553,0.0119614196804184,0.111706476272144,0.10707901  
7077555,0.914726293393257,0.947780490412462,0.000641519091494829  
"a",3.40916983754705,-4.70617805721224,1.7386376777042,-2.706819320415  
6,0.00679312174838098,0.0252050024452773,-17.3220897880561  
"Ahcy",11064.912111909,1.73049827770378,0.394388628823052,4.3877996251  
261,1.14503190995938e-05,0.000189494617453548,14.8323602052766  
"Itch",3498.23757303538,0.232945702969998,0.134142549046866,1.73655342

488394,0.0824660265706147,0.170168545462361,0.412538893993607  
"Armc1",2220.82446821482,0.354668981598346,0.166628898310128,2.1284962  
2841675,0.0332959623306659,0.0851751080455687,0.873566033092089  
"Mtfr1",2906.68723286228,0.845897368196844,0.244856421228349,3.4546668  
7764735,0.000550973124408048,0.00372930520572292,4.72986333192419  
"Map1lc3a",3878.09697010135,0.224625859555182,0.327084950021531,0.6867  
50825864644,0.492239762327419,0.628660308643597,0.10426328644578  
"Ggt7",223.739586399834,-0.652256052635646,0.328650705679622,-1.984648  
26444488,0.0471836185406883,0.1113380363435,-1.43182226782375  
"Acss2",11124.8727759849,-1.13476179132284,0.684195163537564,-1.658535  
24227746,0.0972094802821947,0.193032940884228,-1.8665633459345  
"Dnalc5b",0.569785479848724,2.0465204039241,2.86534577042541,0.7142315  
68506393,0.475083999290907,NA,NA  
"Gss",12540.3618080138,1.91604402204004,0.475064119132592,4.0332324519  
4458,5.50148105439202e-05,0.000621482488983404,14.1469248409764  
"Procr",371.854770392852,-1.21504986102418,0.248289859312047,-4.893674  
93457367,9.89702606491272e-07,2.75589540336503e-05,-12.7570309238425  
"Mmp24",35.8475812920995,-2.04857144167541,0.587563395256413,-3.486553  
89054898,0.000489286792365853,0.00340232306617311,-11.642639572135  
"Eif6",3425.77519999915,-0.38997075130071,0.293829481557454,-1.3272008  
9636226,0.184442235972644,0.312690610989881,-0.453357003014884  
"Hps3",1751.78059014136,0.497024528967724,0.156893641998495,3.16790739  
660751,0.0015354041862162,0.00820425070508182,2.38725994669208  
"Nfs1",3989.29997976891,1.31758767990824,0.246899732182845,5.336529401  
06262,9.47425154378851e-08,4.36711481325741e-06,16.260887123904  
"Rbm39",20153.8880140854,0.312735103761148,0.2001883510415,1.562204304  
76655,0.118239866836776,0.223955117619019,0.467948542698208  
"Epb4l1",2995.3944990308,-0.152356147504914,0.311941290605399,-0.4884  
12890801438,0.625257412911324,0.742283794261141,-0.0454057331817339  
"Aar2",1168.19050193687,-0.241399866087617,0.287476905876574,-0.839719  
160575839,0.401065868282282,0.545136444738093,-0.14646192357497  
"Tb1l1xr1",2232.29262612452,-0.0668484123210573,0.180051953642634,-0.37  
1272907450578,0.710434274902987,0.807887990905077,-0.0142608958168148  
"Ndr3",2648.80839208191,-0.135189638439384,0.283022810254851,-0.47766  
3402174727,0.632889796660235,0.748110649989163,-0.0392326257674249  
"Dsn1",244.112693872288,0.181537239725941,0.235440441455764,0.77105376  
8857503,0.440675061697583,0.582409161050598,0.0981357736376231  
"Sla2",56.8741846791223,-1.36487710466562,0.499121307233174,-2.7345598  
8531459,0.00624637319705248,0.0235959348425855,-5.1137588891171  
"Rab5if",3304.53512050419,-0.461413883043704,0.406771806509965,-1.1343  
3103194284,0.256655716945347,0.397511571133559,-0.425668719620296  
"Samhd1",5515.42425241129,-0.906048900854241,0.25583307023104,-3.54156  
286376893,0.000397764064113989,0.00288098206615697,-5.30004543888941  
"Rbl1",683.438948558217,-0.398041323615051,0.163731668918312,-2.431058  
85528864,0.0150547688431769,0.0462785048340853,-1.22321190896471  
"Rpn2",7752.22358465393,-0.14915151954114,0.163312240732353,-0.9132905  
09470013,0.361089772430899,0.506106294483983,-0.101573462082324  
"Ghrh",0.908491171975813,0.307647455035478,2.6676134173738,0.115326850  
971663,0.908186056354468,NA,NA  
"Src",2061.28660222425,-0.240900825124745,0.133733457962643,-1.8013504

5331766,0.0716476602442227,0.152726148402958,-0.45267887030998  
"Ctnnbl1",998.681235926425,-0.181939860729685,0.122578236621705,-1.484  
27539622045,0.137735874753175,0.251199521647873,-0.251351327387804  
"Tti1",857.489148088325,-0.237203495919674,0.14329225553166,-1.6553825  
2601003,0.0978469282571288,0.194022109951947,-0.388962297530145  
"Rprd1b",1225.52490870906,-0.00547446606514879,0.152001205431142,-0.03  
60159384895719,0.971269650122392,0.982455677427184,-9.68983137134569e-  
05  
"Ralgapb",2824.01612106098,-0.090002170986684,0.146758158445995,-0.613  
268604210537,0.539698749145066,0.670556694757567,-0.0359690997789495  
"Fam83d",49.2189687217325,-1.09329703981299,0.431811111579031,-2.53188  
723146809,0.0113450471166779,0.0374100674244859,-3.59237228114522  
"Dhx35",739.415028276539,-0.185177919257026,0.161904018913485,-1.14375  
122062892,0.25272682467105,0.393018633548902,-0.17293733558949  
"Ccn5",111.651412208758,-4.58525142807782,0.979052154747391,-4.6833576  
8002152,2.82213423694247e-06,6.29587795788377e-05,-44.353276171681  
"Skil",2576.99595952003,-0.849090750945915,0.13889573403262,-6.1131521  
1989524,9.7682174657982e-10,1.53597342054946e-07,-13.3213264766425  
"Slc2a10",150.583602082988,-1.45439096326652,0.326697454829482,-4.4517  
9765488417,8.51543900251404e-06,0.000150121184151012,-12.8045564966112  
"Zmat3",1030.63951837932,-0.127319823566921,0.123397326259989,-1.03178  
753888612,0.302171658068101,0.446722005254968,-0.102596706171931  
"Pik3ca",5472.78582914565,0.423869971543482,0.175590186326193,2.413973  
01530315,0.0157796309687544,0.0479313358200301,1.2877109528877  
"Zfp639",1461.45804761757,0.128913116906644,0.0987260499766506,1.30576  
597500996,0.191632154170685,0.321488867487121,0.146289620516694  
"Mfn1",3782.44449228946,0.772826867067218,0.227004520867684,3.40445584  
128997,0.000662960184121502,0.00428191464783333,4.21449927649829  
"Gnb4",1003.47515830279,-0.968449536488519,0.165625981093676,-5.847207  
84802944,4.99892734538219e-09,4.7778963421697e-07,-14.094906844492  
"Ocstamp",46.4967645267642,-0.197808603715793,0.386201597513034,-0.512  
190019382604,0.60851802752715,0.728552688340024,-0.0626450613356507  
"Actl6a",1757.53065667276,0.344708954542021,0.139437393750228,2.472141  
40533559,0.0134306380177895,0.0425183601349016,1.08852858717923  
"Ndufb5",5867.00412432112,0.841613856562638,0.327771207021739,2.567686  
96741205,0.0102379561978349,0.0344706734493842,2.83425784174292  
"Pex5l",70.9313722244419,1.08904093468524,0.381370660292167,2.85559705  
576441,0.00429559915481075,0.0176998293154058,4.39340924652055  
"Ccgc39",319.206573926967,0.1659044226422,0.415234424782486,0.39954399  
9101487,0.689492410430089,0.79192524850176,0.0387035565443575  
"Ttc14",4185.90035585828,-0.0135954957829963,0.189730908335075,-0.0716  
56726372626,0.942875094940101,0.964603710314293,-0.000489953455665854  
"Ncoa3",4050.66775709148,-0.099148986227323,0.170351555888377,-0.58202  
5715645888,0.560549359544074,0.688781914065437,-0.0369657743764048  
"Dnajc19",3185.81662102958,1.15941561076518,0.232229395171176,4.992544  
59113833,5.95889501094222e-07,1.80413874104583e-05,12.6641136896875  
"Fxr1",3459.94659033642,-0.213508356463634,0.161173493392021,-1.324711  
35278007,0.185266906291805,0.313679588301286,-0.247538008691569  
"Mecom",2927.15438970641,0.380882576029277,0.255036488243725,1.4934434  
6235386,0.135321143298919,0.247582964440492,0.531715711007119

"Slc2a2",3694.72987931521,2.19581067815968,0.745782317706909,2.9443050  
9550192,0.00323680745699498,0.0143012172663694,9.32650959791405  
"Tnik",200.608543608579,-1.12262034921421,0.302811514968686,-3.7073238  
4245791,0.000209461020738192,0.00175521653955485,-7.12320915375126  
"Plld1",832.879391093843,0.0910977046092835,0.146725423209813,0.6208719  
83984781,0.534683855883202,0.666636878171889,0.0369410112339989  
"Nceh1",5709.00199512363,1.36514707797271,0.438375759396793,3.11410256  
774042,0.00184505338504722,0.00938555984911316,6.37330238217826  
"Ect2",172.390216896141,-0.111508633156351,0.305648194747476,-0.364826  
735680471,0.715240746434157,0.811177528732736,-0.0233352274255369  
"Lrrc34",31.453642454987,1.72568037070714,0.411459301986736,4.19404874  
886696,2.74019052813247e-05,0.000363457380391339,13.6671271226152  
"Lrriq4",5.17078236158579,2.04514995447904,0.884181628416416,2.3130428  
0563027,0.0207202857810823,0.0590217870211165,5.78746480029571  
"Sec62",19136.398447201,1.06621446128482,0.151619598538578,7.032167817  
10138,2.0334900922771e-12,1.20148453997633e-09,21.8997336235107  
"Dcun1d1",2226.03322331965,-0.299296183687095,0.138017906495054,-2.168  
53154266486,0.0301182673780213,0.0789309109323466,-0.759967588331496  
"Mccc1",4376.48081217628,1.01210847008118,0.398379288238931,2.54056498  
407658,0.0110673524703615,0.0367116771805219,3.34467477674816  
"Acad9",4673.47591174963,0.99370231429793,0.145351949504399,6.83652553  
464965,8.11369018812543e-12,3.46090133983301e-09,19.3590469237955  
"Anxa5",9257.36028018898,-0.963867559532544,0.278429839887865,-3.46179  
691056366,0.000536581893233809,0.00365618261225184,-5.40858442566314  
"1810062G17Rik",24.5848656524951,-0.708793323161637,0.523162895761362,  
-1.35482338083271,0.175473835475055,0.30179638259343,-0.84913632823299  
5  
"Exosc9",1084.59096138917,-0.0138458934244015,0.139969219435165,-0.098  
9209876305346,0.921201004914906,0.951510982800244,-0.00068819697484326  
7  
"Ccna2",389.121759316759,-0.505487284318473,0.38517501178423,-1.312357  
41897411,0.189399566920266,0.318716006395577,-0.578001879183256  
"Trpc3",179.595222688625,0.370380308342749,0.499756702426421,0.7411212  
42685646,0.458619930611584,0.59837870764619,0.190201931274918  
"Il21",4.39670429876253,-2.20381700136173,1.72932302345755,-1.27438134  
545592,0.202528300209487,0.334567211512715,-2.41299777584607  
"Adad1",0.398340086055756,2.29058749941777,3.59814418095252,0.63660247  
7339135,0.524383811125015,NA,NA  
"Il2",7.04870600356169,-0.347162085454865,0.642100976734112,-0.5406658  
73490209,0.588737904682733,0.712177251758292,-0.117836688375204  
"Spata5",482.633938123192,0.212563785260593,0.358976812870976,0.592137  
925457022,0.553758232531179,0.683408951066076,0.0809149219427488  
"Slc7a11",82.3908816089374,-0.561856939237684,0.237486439871923,-2.365  
84850714295,0.0179888035930032,0.0529744015976767,-1.65070561174454  
"Rab33b",1628.94961259396,0.0285318453134615,0.179767346559387,0.15871  
5394422512,0.873893108928609,0.921235285353051,0.0023407471138524  
"Cog6",1570.67725171012,-0.0732364866882955,0.173202919724054,-0.42283  
6328654132,0.67241468016221,0.778547591080925,-0.0183329350876352  
"Stoml3",2.35494381944182,0.941457913886462,1.04145905974821,0.9039797  
62885808,0.366006132295921,0.51105611339916,0.631977993251668

"Ufm1",4035.99506114655,0.198726721666749,0.208146984127241,0.95474225  
8217235,0.339708054040378,0.484360339135596,0.14406219662864  
"Trpc4",27.2668599081055,-0.0501124982252275,0.608645756645814,-0.0823  
34424709362,0.934380780380032,0.959022817068478,-0.00209672756297996  
"Postn",1509.16262793697,-2.89659485579754,0.678458148183252,-4.269378  
8313309,1.96018099529196e-05,0.000284160662053552,-23.6535089200546  
"Supt20",3226.08336353045,0.0291100088355493,0.177967556342834,0.16356  
9188866493,0.870070301694456,0.918485014358499,0.00247521502141779  
"Exosc8",985.360515512217,-0.145374296310141,0.236198412812522,-0.6154  
75331011343,0.538240855921883,0.669470541513452,-0.0583340699291529  
"Aadac",3519.4088104662,2.02351370378304,0.673006669296179,3.006677045  
11637,0.00264120200914879,0.012311297340278,8.89787126114555  
"Sucnr1",850.25804407877,0.982120901411365,0.585403681856862,1.6776814  
5614688,0.0934093014434761,0.187221891400586,1.64550505205675  
"Mbnl1",8391.27543131833,-0.551578500617578,0.174570672034121,-3.15962  
867181819,0.00157970329295547,0.00837189478915665,-2.638131044014  
"P2ry1",240.049651232518,-0.157320368387258,0.286254176553718,-0.54958  
2787861037,0.582605567081665,0.706841101795676,-0.0545822055761024  
"Dhx36",2202.22494423783,0.10239566405156,0.0921731586775483,1.1109054  
4710281,0.266609050606823,0.408546311594768,0.0916594788017952  
"Gfm1",3190.79221548889,0.151875528853654,0.434560068976206,0.34949260  
1129832,0.726719524503,0.820283506354029,0.0300873409826288  
"Mfsd1",7336.85587968284,0.795416569776468,0.231498661510655,3.4359445  
7344134,0.000590491764392681,0.00391213334085236,4.40952891802297  
"Il12a",6.97149668224735,-1.04348321084474,0.688018800845152,-1.516649  
26825101,0.129355259226965,0.239317662435465,-1.49214288145056  
"Schip1",1012.09572448129,0.0118675720412083,0.257958923506593,0.04600  
56658629411,0.963305733987405,0.978046740493088,0.000263434206338703  
"Ift80",966.712111989887,-0.0368367864688566,0.165664810663537,-0.2223  
5733902278,0.824035719034086,0.887241065201093,-0.00440710000424604  
"Kpna4",3657.55921566755,-0.308920160385169,0.161792919796574,-1.90935  
524727276,0.0562162797998532,0.127187865344342,-0.637021183062894  
"Ppm1l",971.082232812162,0.176030805412076,0.211047521598887,0.8340813  
67449732,0.404235133992383,0.548100444892579,0.105846745073704  
"Nmd3",940.269440202117,-0.0304021502809146,0.13129783984114,-0.231551  
031743544,0.816886744812433,0.882761056939136,-0.00379116998977883  
"Bche",463.60987169973,-3.56221701518793,0.81919376614952,-4.348442532  
62756,1.37107734008937e-05,0.000217520471741762,-30.0409511880122  
"Ccna1",1.5798140900808,0.670516905451927,1.64095899516947,0.408612833  
974367,0.682823810761519,0.786582693030137,0.16096255937919  
"Sohlh2",1.01638935049753,-1.7834648032824,2.2194830194648,-0.80354964  
9914628,0.421657111617515,NA,NA  
"Smad9",75.1245302249472,-0.275850413858562,0.2386565698672,-1.1558467  
2155499,0.247743858488927,0.387060076347524,-0.261830416421046  
"Dclki",461.053257590901,-1.5445524515575,0.385122650508701,-4.0105468  
9854604,6.05782656438559e-05,0.000671492338558216,-11.2845124926038  
"Nbea",851.832384712828,0.0754413876592786,0.148885497702607,0.5067074  
28348528,0.612360117662097,0.731784602486857,0.0235580117542364  
"Tm4sf1",4408.02252455926,-0.698419395034132,0.222611554344321,-3.1373  
9058644666,0.00170458881674449,0.00888190078805025,-3.29915141810808

"Tm4sf4",82.7858614211477,1.26799501369587,0.532749594809137,2.3800956  
8857607,0.0173081429250381,0.0514719287858587,3.7617845085419  
"Wwtr1",3248.6800175105,-0.314067125301375,0.190450761454888,-1.649072  
56291421,0.0991327698188406,0.19599378887931,-0.511826497473462  
"Ppid",2659.26431617267,-0.150900939316993,0.106786802236869,-1.413104  
76721901,0.15762492174852,0.278385029370711,-0.192964595131901  
"Pfn2",2109.37300689166,0.246297427177046,0.286059723086893,0.86100001  
9573642,0.389238032284456,0.533410398754732,0.154789108684835  
"Tsc22d2",1796.46525562373,-0.0668492187944725,0.104014438206436,-0.64  
2691725756361,0.520424151023009,0.653858502264749,-0.028401847105309  
"Serp1",10069.0795236306,0.0800259531413046,0.190029717303871,0.421123  
36047597,0.673665004133486,0.779532359085739,0.0199313502156033  
"Etfdh",5266.44610691087,-0.271043643522248,0.459247324413172,-0.59019  
10128025,0.555062596698125,0.684542094270717,-0.102726933995969  
"Eif2a",2392.69850735355,0.153237667622543,0.0945832483405923,1.620135  
38666739,0.105203197396529,0.204858877742686,0.242948198852627  
"4930579G24Rik",92.2624703706831,-0.465341490056899,0.298635641678596,  
-1.55822489050962,0.119179946588757,0.225346256651241,-0.6934133308682  
76  
"Mme",5220.36000792241,0.205554825318547,0.221984072943567,0.925989070  
264527,0.354451660315546,0.499573404137091,0.142655200154179  
"Slc33a1",4708.72479339775,1.18471962061787,0.244003320620312,4.855342  
20438493,1.20179021804396e-06,3.17858608063866e-05,12.2695357140193  
"Gmps",2208.73307206054,0.178841203488361,0.13407967269966,1.333842780  
84395,0.18225538715312,0.310312656117172,0.209275491279095  
"Vmn2r1",859.88794661421,0.548893898330134,0.273892181227346,2.0040509  
9506846,0.0450645980754469,0.10724637291286,1.22547508546221  
"Kcnab1",204.981462221287,-0.713546110406439,0.377635018783865,-1.8895  
1255819532,0.0588231816470014,0.131564182111945,-1.44725736893011  
"Ssr3",8386.22527456462,-0.148503386079706,0.193468881806951,-0.767582  
800359007,0.442735083964992,0.584141877598417,-0.0798371110030703  
"Ccnl1",6070.83915168236,-0.325283507864651,0.171707440465219,-1.89440  
543160703,0.058171216033251,0.130509886357121,-0.662376855558176  
"Veph1",1197.46208425364,1.04093356229403,0.567017139938047,1.83580616  
700186,0.066386329068337,0.144062397793482,2.01681789057927  
"Ptx3",60.7842066223652,-1.23244678448237,0.465853283219536,-2.6455685  
2742319,0.00815537665234556,0.0289062959402715,-4.36741656166054  
"Shox2",2.79210651529833,-4.75748900379914,1.89867919330519,-2.5056834  
3539773,0.0122214985789029,0.0395051026676806,-15.3729952197517  
"Serpini1",476.194534343348,-0.12310225422963,0.279569400082895,-0.440  
328069499483,0.659699513655017,0.76866386502005,-0.0323883891742733  
"Pdcd10",1679.68979314025,-0.115511831919692,0.180311174984765,-0.6406  
24919278861,0.521766405294592,0.655122761957238,-0.0488537238024254  
"Wnt2b",13.3420216220798,-2.77234740006696,0.910597772124677,-3.044535  
67198864,0.00233039792071992,0.0112387085476619,-12.4433800591949  
"Ptprn22",597.101694599949,-0.690764402968041,0.460168995045946,-1.5011  
1026689026,0.133327043750558,0.244761387726992,-0.972231190123643  
"Dclre1b",421.836024996243,-0.173453090180782,0.210032735257374,-0.825  
838362616341,0.408895789100095,0.552662769614041,-0.102858945795324  
"Olfml3",3440.47001782958,-1.3525252147703,0.34955419713443,-3.8692861

532146,0.000109154472181857,0.00106149321626027,-9.26219907059518  
"Syt6",3.14167925495401,0.41571394228431,1.2961075514969,0.32074031341  
3185,0.748407194308879,0.836345004550785,0.07429392898464  
"Nras",3797.47048103693,-0.23841114325894,0.100404529944774,-2.3745058  
4540433,0.0175724579704744,0.0520405581266944,-0.704679421550736  
"Sike1",2118.99806276497,-0.332463883094589,0.168456949431003,-1.97358  
366168658,0.0484291030283964,0.113657998416908,-0.722963111624169  
"Sycp1",1.38597590354255,0.207724189814709,2.12786328392396,0.09762102  
26399736,0.922233230585452,0.952088732371109,0.0101986433261794  
"Tshb",1.07127345139979,2.56443088348682,2.80459793877601,0.9143666719  
67959,0.360524208103341,NA,NA  
"Tspan2",624.804883217057,-1.03275971754392,0.252566420693144,-4.08906  
185830092,4.33121348794429e-05,0.000519053476262679,-7.81128188597816  
"Ngf",393.510144365715,-0.614889434828767,0.335844567914546,-1.8308750  
3438562,0.0671191974618486,0.145297003676155,-1.18610655061941  
"Vangl1",1152.60706430316,0.229425313438914,0.219928805101773,1.043179  
92057814,0.296864971325006,0.441181246713627,0.187738618744051  
"Casq2",26.2994057235729,-2.36509746143652,0.568022333432901,-4.163740  
26553289,3.1307624509213e-05,0.000403727554682959,-18.4826933440533  
"Cd2",280.814114785694,-1.64091013627423,0.518603300431508,-3.16409505  
089709,0.00155565980423607,0.0082716811734374,-7.86802873626092  
"Ptgfrn",1650.17902300527,-1.47069744089655,0.261846014521422,-5.61665  
00894984,1.94695135094228e-08,1.32733067974379e-06,-19.9019787488543  
"Gdap2",656.6870563233,-0.0148587777874665,0.16795641766209,-0.0884680  
561439499,0.92950467226861,0.956333813513448,-0.000663418418865256  
"Spag17",11.2800827023483,-0.261543315892285,0.892641714996187,-0.2929  
99208415218,0.769522756748359,0.850913327912409,-0.0422248614023895  
"Tbx15",13.0251497244535,0.624402066383119,0.725455353864895,0.8607036  
43658552,0.389401285806163,0.533596617516941,0.392196380969366  
"Hsd3b6",0.141341260214298,-0.569882494411888,4.78471990596623,-0.1191  
04671874582,0.905192429472853,NA,NA  
"Hao2",7826.0872543974,2.06604604082026,0.799272417784753,2.5849084678  
1185,0.00974048520508608,0.0330986372479555,7.04162862473993  
"Hsd3b1",3.11575179662712,0.613465024062151,1.33191633761084,0.4605882  
56738837,0.645094038384054,0.757941763206525,0.17002104976264  
"Hmgcs2",2001.65059678708,1.90933761031498,0.590167799421251,3.2352453  
1868289,0.0012153825787713,0.00682532532283489,9.52208675713796  
"Reg4",0.194022338728155,0.863911481469598,4.78471990596623,0.18055633  
3170591,0.856715833519269,NA,NA  
"Notch2",2822.64449260811,-0.620794612721622,0.165671796269682,-3.7471  
3515939121,0.00017886571942556,0.00155196078648198,-4.01544613957962  
"Sec22b",2636.08015921802,-0.473459083788886,0.214837326662224,-2.2038  
0271503414,0.0275382215652875,0.0737352710903564,-1.23443756762422  
"Prpf38b",8466.11007559785,0.167626719176565,0.161128249237616,1.04033  
104045812,0.298186127723181,0.442569317069848,0.136642290997619  
"Stxbp3",2279.09669890621,-0.239670363257417,0.123860980837621,-1.9349  
9487600231,0.0529909244691397,0.121512059896423,-0.505163233924062  
"Gpsm2",271.65918621534,-0.660533635958906,0.234416250501504,-2.817780  
91128827,0.00483567936625331,0.0193645669096749,-2.60534964419162  
"Clcc1",1744.33574023537,-0.00266276769520512,0.132320275543499,-0.020



1236559118996,0.983944729276125,0.989723009277618,-2.75068259471672e-05  
"1700013F07Rik",1.97526008502235,-0.560266202555178,1.10368042499495,-0.507634447315436,0.611709728128043,0.731321128152589,-0.17530876037871  
"Syp12",1344.31887375376,1.75491367490346,0.619405769224651,2.83322139072129,0.00460814585852808,0.0186371350237669,6.98911776611515  
"Ampd2",2256.65842584258,-0.0482625882522045,0.170838933352628,-0.282503451087381,0.77755750072358,0.856253029995954,-0.0074898397354358  
"Gstm4",729.469326436633,-0.964968229305289,0.432676210007144,-2.23023176913137,0.0257320602006103,0.0700340186755305,-2.56563260671509  
"Ahcyl1",8460.24393317577,0.240758821819325,0.24563533245455,0.980147356707623,0.327013385839552,0.4718038973258,0.180856065126518  
"Slc6a17",739.85813963991,0.835109283563197,0.308474105504168,2.70722653429305,0.00678479427019724,0.0251809053172351,3.07459620909327  
"Kcnc4",1.8042731952566,-0.820569974488994,1.45585723078341,-0.56363354670941,0.573003551346694,0.6991503907483,-0.293673302888823  
"Slc16a4",2386.49047146457,2.28098881369155,0.727769573602314,3.13421843455355,0.00172312533700058,0.0089355047395844,10.7610725720582  
"Dram2",4889.23185452221,0.0446873071978388,0.307261254976187,0.145437494881358,0.884365462727599,0.927951660474155,0.00334152188651181  
"Dennd2d",1052.99298754397,-0.861346996246427,0.267096718266773,-3.22485054041781,0.00126038449951047,0.00702488188651019,-4.27081412168445  
"Chil6",20.1159604657225,-4.70867305315606,1.37729451255759,-3.41878444314152,0.000629015352464325,0.00412130382311354,-25.858081622408  
"Ddx20",797.816224738503,0.0511478068764637,0.108303891117297,0.472261950598513,0.636739825587389,0.751204279016331,0.0146322446426138  
"Sl00a11",14961.9147284176,-0.420697553696296,0.249718857412493,-1.68468476131691,0.0920494081147136,0.185315370100226,-0.709168268463577  
"Tchhl1",60.949792010707,1.71983580824753,0.697922586231512,2.46422145116971,0.0137311245309477,0.0432760757878048,5.40055156088931  
"Crct1",1.3858135589868,1.22525904640655,1.68325186204157,0.72791189128433,0.466667523480033,0.605337893480938,0.615041415291232  
"Npr1",3065.94934676519,-0.708013775426844,0.176359886071932,-4.0145964663306,5.9547585779766e-05,0.000662361615482035,-5.18244765616036  
"Slc27a3",583.311670460196,-0.411291348559418,0.233636901195591,-1.7603869356883,0.0783422229111682,0.163615752176731,-0.744533819457697  
"Ints3",2274.06926247145,-0.180767862438334,0.101415835452714,-1.78244217612957,0.0746771528628761,0.157701194251095,-0.333887860963273  
"Rab13",1139.35919268488,-0.46332108994754,0.177483317430852,-2.61050501339684,0.00904086467821259,0.0312717366499537,-1.60542637443875  
"Crtc2",2935.97571405688,-0.0879125558102602,0.113739170788841,-0.77293121798357,0.439563088168546,0.581489980400399,-0.0476628064484076  
"Jtb",3086.12825719864,0.419359140403809,0.140960999198623,2.97500119031439,0.00292987410972325,0.0132821867917656,1.81218985503535  
"Creb3l4",52.0880435780992,-0.673018743255566,0.294261239958806,-2.28714710557796,0.0221872381804806,0.0624072086040118,-1.8670041254622  
"Nup210l",64.9184027170769,-1.01320569034934,0.369146326489318,-2.74472646114402,0.00605613536343423,0.0230090661177398,-3.82167706882394  
"Tpm3",8298.98938355633,-0.860672553948133,0.132257551158111,-6.507549

44735983,7.63866120682652e-11,1.93426774299615e-08,-15.2863638465107  
"4933434E20Rik",2897.20342855284,0.3070856690415,0.13158343543259,2.33  
377148143256,0.0196076908580953,0.0565715827687395,0.882026349535711  
"Hax1",3623.55480695803,0.919295624173621,0.176407477124963,5.21120555  
180558,1.87617434921269e-07,7.3017260401096e-06,10.8728768758914  
"Il6ra",1354.07429896603,-0.712179889884156,0.32484955300771,-2.192337  
60148426,0.028355138583994,0.0753843048964704,-1.84109624610395  
"Chrn2",157.710478611467,0.565291185222317,0.313311809770539,1.804244  
74148076,0.0711929482135543,0.152072754630574,1.06466728357611  
"Adar",2656.95018246412,-0.41596435991783,0.195276056647517,-2.1301349  
8459091,0.0331604707681102,0.0849287874736127,-1.02574405553388  
"Pmvk",1587.1241927272,-2.26840347529481,0.565092159174943,-4.01421863  
40132,5.9643043222204e-05,0.000663010294610339,-16.6018099747687  
"Slc50a1",1685.87965421478,-0.406979760136541,0.118582363844888,-3.432  
04290200263,0.000599052784134813,0.00395809257372436,-2.25140920174138  
"Efna1",1817.72850031851,0.195136341016522,0.118684000854243,1.6441671  
9702743,0.100141670731969,0.197587765222823,0.316427707263481  
"Gask1b",576.657225960845,-1.49030512450316,0.242457811482967,-6.14665  
749636138,7.91327459029499e-10,1.30756803357264e-07,-23.6212269870346  
"Tmem144",482.134964320606,1.4433648586393,0.435431363462484,3.3147930  
5294383,0.000917109931525512,0.00550548320347427,7.50839949245167  
"Slc35a3",4790.27133894314,0.861436557676665,0.213401915996967,4.03668  
614525891,5.4211514985856e-05,0.000614187169781651,6.37050496886557  
"Sass6",175.402789405892,-0.596627618880126,0.255273308489401,-2.33721  
11342573,0.0194282085140889,0.0561701081861958,-1.71791199296637  
"Lrrc39",124.724631900545,-3.28958617802832,0.822813310043187,-3.99797  
394849588,6.3886980532158e-05,0.00069858672145787,-23.9036175398305  
"Vcam1",5503.18363712444,-1.52681831318079,0.4584206750459,-3.33060526  
344698,0.00086657392257517,0.00527805586330754,-8.0069367149417  
"Extl2",717.41562352091,-0.255148265544796,0.208221333247737,-1.225370  
43426394,0.220435681350295,0.356330203529104,-0.263286842042384  
"Olfm3",342.782203791781,1.97357257647956,0.789258168724398,2.50054121  
032317,0.0124003704878165,0.0399112617648476,6.35706820244665  
"Col11a1",20.7467563509991,-1.13235830745113,0.701489903489099,-1.6142  
1896711408,0.106479939310486,0.206540574679254,-1.78602165034755  
"Neurog2",27.4815091613363,1.64955133309057,0.905888916912845,1.820920  
09549254,0.0686190039993405,0.147914776267314,3.15248890586796  
"Larp7",2549.31399938325,0.222843215838924,0.205800271067808,1.0828130  
3364028,0.278891419179866,0.422650776555964,0.191914589366733  
"Ndst4",3.37870974495773,0.845367247273033,1.3138215808732,0.643441438  
000418,0.519937702649621,0.653366896609661,0.359802201982592  
"Ndst3",125.746572825658,-0.181083480124394,0.457677649607303,-0.39565  
7249769062,0.692357896948568,0.79446764799336,-0.041664232855047  
"Prss12",61.3549687968341,1.45379496390273,0.311979432539208,4.6599064  
3059467,3.16353159659894e-06,6.92284389118812e-05,13.9245918178546  
"Rnpc3",1305.9898529729,0.0979472380074051,0.108876814770019,0.8996152  
04709098,0.368325062853537,0.513374942849257,0.0653062051706425  
"Cyp2u1",449.255399596448,0.413782395550384,0.289434076889536,1.429625  
70267186,0.152824474565607,0.272001059340959,0.538723707711163  
"Hadh",14771.4613114258,0.16208842822313,0.543979681461359,0.297967798

701033,0.765727740800111,0.848400925680223,0.026647656136521  
"Lef1",145.013044112501,-0.696408315300226,0.30602406433189,-2.2756652  
0567793,0.0228660553817264,0.0638104910192588,-1.91640263303605  
"Trim2",3553.42784365617,0.575227198624557,0.267448991030047,2.1507921  
8062906,0.0314926065670072,0.0815353661988457,1.44193260974328  
"Mcub",277.882304672291,-1.30436925664024,0.410416355208228,-3.1781610  
0671344,0.0014821242154739,0.00796978983819916,-6.3028389749116  
"Tlr2",541.855057175118,-1.22756164721688,0.371890789233178,-3.3008659  
6053659,0.000963869190355975,0.00570711250335888,-6.34163511844183  
"Sfrp2",744.640179148792,-0.817942475524672,0.276023994184429,-2.96330  
207792788,0.00304357722049972,0.0136799604991479,-3.51046453712103  
"Casp6",924.069429297613,-0.145743874941479,0.171477825042776,-0.84992  
8408557331,0.395364890134503,0.53972027080043,-0.0898808730163369  
"Plrg1",1207.61723315609,-0.207007912671872,0.0910310437305992,-2.2740  
364625995,0.0229637943004347,0.064028036789629,-0.568947630317354  
"Pla2g12a",1385.70797563986,-0.198335560205459,0.384557807944171,-0.51  
5749663921145,0.606029262906803,0.726745051278228,-0.0633046546477226  
"Fga",730.340327724513,1.45476427663492,0.688323954046179,2.1134877960  
9278,0.0345590384662683,0.0875789098018326,3.54266388352235  
"Lrat",97.4831544042272,2.31717016341005,0.821764951791846,2.819748102  
371,0.00480613612330429,0.0192660448462556,9.15145748728195  
"Npy2r",4.01353681066133,-0.96295763646337,0.969601594914633,-0.993147  
743891811,0.320637959875611,0.465887607245795,-0.735517500560791  
"Gucy1b1",799.070887669299,-1.15260287458781,0.217138203408022,-5.3081  
5331663199,1.10741476019959e-07,4.89622970393912e-06,-14.0929273267481  
"Snx7",2458.21440435102,0.626837355162507,0.372036214195418,1.68488263  
035934,0.0920112184084604,0.185257614263544,1.05685274097639  
"Asic5",2.4597028870328,1.25510074105632,1.03488177358312,1.2127962566  
3009,0.225207726976738,0.361229044142188,1.27799760729952  
"Gar1",810.058538971635,-0.468759144461203,0.20437138174249,-2.2936633  
3223623,0.0218098445030074,0.0616034112877935,-1.30644956342711  
"Tdo2",5.95249230611705,0.587843431128821,0.615424008036542,0.95518443  
1306614,0.33948443753344,0.484112306225921,0.426444175511454  
"Rrh",2.47484170688894,0.740824428849473,0.979895443949485,0.756023954  
82478,0.449634833482046,0.590445824246468,0.390323643827524  
"Ppa2",5100.82744831482,1.40233437162304,0.372939238587257,3.760222112  
68321,0.000169762560501319,0.00149572092392893,9.12239118149001  
"Ctso",1924.86629367554,-0.593058893266864,0.143934343802195,-4.120343  
18982194,3.78308471440201e-05,0.000466556519680015,-4.54883963226496  
"Ints12",686.851941405185,-0.251662455156926,0.146913162859663,-1.7130  
014102094,0.0867122801549073,0.176742216021366,-0.436146893210573  
"Egf",23544.3758255464,2.77334199243458,0.738299912845326,3.7563894349  
4714,0.000172382377641374,0.00151030072091436,18.0140945243624  
"Gstdc",462.668712036362,-0.331643683837901,0.194475599406817,-1.70532  
285206715,0.0881342278663533,0.179153583709149,-0.57026523819251  
"Pdgc",693.726558500458,-0.332484377662596,0.296503617462107,-1.12135  
015588836,0.262138843931773,0.403758841850202,-0.301542552050373  
"Glr",52.8934624709915,-1.14795978376455,0.353878133997895,-3.2439409  
8837251,0.00117888167191305,0.00666642541733195,-5.75204935116555  
"Pitx2",195.676624713521,1.13900768615476,0.615915896516013,1.84929093

825581,0.0644158135320706,0.140773316772956,2.23314344098558  
"Enpep",5226.36823348285,-0.196698399729668,0.184005929360773,-1.06897  
859440176,0.285079314913115,0.42925913060282,-0.166346756456556  
"Alpk1",833.443733620132,-0.581753584894815,0.312286899285639,-1.86288  
181228731,0.062478896230948,0.137620144454476,-1.15376743122782  
"Aimp1",2161.07276070869,0.110370440780234,0.117165857885471,0.9420017  
29617521,0.346191754384904,0.490912496508863,0.0785273966928934  
"Tbck",1322.38853842445,0.447316646363109,0.144148965053072,3.10315544  
893727,0.0019146904054652,0.00965415917397479,2.07571316009991  
"Dkk2",4190.34684156482,-0.0493590359533857,0.380463045013315,-0.12973  
4113734117,0.896776791784804,0.93639768040594,-0.00324363005996269  
"Papss1",3647.0845424749,0.464753335448957,0.167534879021127,2.7740691  
2616895,0.00553599136240588,0.0214253194887237,1.78613160799383  
"Kcnq5",23.0874380023248,-0.284268607067607,0.833229740849507,-0.34116  
4739004377,0.732979566742991,0.825266497622903,-0.0545934782346947  
"Fubp1",5493.38861502691,-0.320923428816416,0.0832087032567567,-3.8568  
4929887856,0.000114857924819542,0.00110811470466671,-2.18391447600355  
"Dnajb4",2337.04800677784,-0.487434953875938,0.151660351068462,-3.2139  
9067351428,0.0013090392514731,0.00722435531424356,-2.40319922669987  
"Ptgfr",674.767705954933,1.97787474367486,0.591642346060351,3.34302430  
656832,0.000828706407320063,0.00509880641524979,10.4407039353968  
"Ifi44",889.036402541925,-0.49074003444319,0.305614449015698,-1.605748  
79893189,0.108329114542897,0.209336082790626,-0.76742626721018  
"Efna3",57.7575066503424,1.69808626047842,0.372609510868043,4.55728104  
3424,5.18200653010448e-06,0.000102265954781353,15.6019040430786  
"Efna4",483.82286448232,0.522415152594515,0.343211035866902,1.52213972  
745652,0.127974073480337,0.237448896983915,0.751129994893856  
"Adam15",5001.65292723385,0.030018261124901,0.168213464653706,0.178453  
378786879,0.858366931777922,0.910331163220339,0.00282012047616932  
"Zbtb7b",3443.78210025776,-0.349290334835312,0.251069617056651,-1.3912  
0909542988,0.16416202994697,0.286755092898595,-0.436307905079288  
"Cks1b",388.486268954801,-0.954392496003994,0.276302340567121,-3.45416  
001198205,0.000552009747754912,0.00373329381259982,-5.33549724897924  
"Thbs3",932.00676234104,-0.84412807759703,0.307226130838494,-2.7475790  
398857,0.00600370362588377,0.0228590508866755,-3.18946039959139  
"Gba",1776.884447848,0.0089972316656087,0.0860682877420362,0.104535966  
749742,0.916744027283571,0.948913045812766,0.000471797839461505  
"Scamp3",2167.85060538038,-0.0614991074156553,0.123675863041458,-0.497  
260386167993,0.619005442928177,0.73719570768468,-0.0187511932024765  
"Hcn3",95.169286550004,0.416039558754969,0.410168459018098,1.014313874  
23335,0.310433005791783,0.455647602147561,0.327021891933742  
"Ash1l",2767.41357273536,0.0487612860175662,0.173013243144022,0.281835  
570107056,0.77806959502902,0.856623431048889,0.00754614354423086  
"Rit1",1684.08447869604,-0.316910697632865,0.154241248078645,-2.054642  
98026996,0.0399135010798029,0.0977311872477706,-0.736986778657823  
"Arhgef2",4347.81909537285,-0.162121830572886,0.20239458506808,-0.8010  
18616769578,0.423120868318747,0.566349330025327,-0.0921734265151142  
"Khdc4",4586.75645617088,-0.0290356265355816,0.104726993787841,-0.2772  
50644608427,0.781587654398563,0.858896245587735,-0.00441652638355096  
"Lamtor2",5212.80485934513,0.38955638808735,0.251727545157018,1.547531

82789098,0.121735055757518,0.22913613606844,0.573987563770907  
"Lmna",5685.38922594743,-0.26953933158772,0.104077486146968,-2.5897947  
9199856,0.00960331593877736,0.0327695929601472,-0.921353962362113  
"Sema4a",5042.14749104328,0.148244219494221,0.125565340100094,1.180614  
16769985,0.237756032808773,0.375852693992659,0.145065564516149  
"Pmf1",820.102418731633,-0.0926571963845156,0.177670801700773,-0.52151  
0543643325,0.602011162574465,0.723601466855331,-0.0299759464022024  
"Iqgap3",190.015402183096,-0.595322673965687,0.388460829835633,-1.5325  
1660976367,0.125395002016674,0.234123503717429,-0.864352865401735  
"Gpatch4",1402.9085861853,0.406398744073222,0.220057258702077,1.846786  
3612871,0.064778109322059,0.141438250342834,0.794872072859087  
"Naxe",2936.24240988615,0.568169418213495,0.233982546518405,2.42825555  
438941,0.0151716486460355,0.0465486711723683,1.74272152401595  
"Sh2d2a",214.383197183296,-1.49780595852087,0.490250194101431,-3.05518  
687507339,0.00224920328963458,0.0109473204546418,-6.76208548747319  
"Ntrk1",88.3336734525185,0.351019625122853,0.347556630597465,1.0099638  
2810892,0.312512620391504,0.45755839134377,0.274444964558879  
"Pear1",3092.2884932374,-0.305284588058124,0.210816703323655,-1.448104  
36386265,0.147587865309512,0.26467501307899,-0.405800323665944  
"Cd1d1",1223.71425445397,-3.13743842352336,0.699633608593958,-4.484402  
09987713,7.3118666513318e-06,0.000132581880464041,-28.0120232829456  
"DclK2",246.123814886994,0.351489697264785,0.215984206517703,1.6273861  
0814109,0.103655120068387,0.202755570936336,0.560891128853481  
"Lrba",2430.41250962374,0.469756832048566,0.195444947027883,2.40352508  
055145,0.0162378531172572,0.0490709330564602,1.41607652772826  
"Rps3a1",32510.0626369671,-0.274417829345523,0.257532992593544,-1.0655  
6378109824,0.286620879155643,0.430750310500328,-0.2311220180938  
"Sh3d19",3080.82783171101,-0.0184622442420635,0.176529815109403,-0.104  
584283570578,0.916705686200172,0.948913045812766,-0.000968125226597338  
"Gatb",2126.54224745824,0.944685748664707,0.3293156631013,2.8686329091  
3106,0.00412249953378513,0.0171897619879333,3.83867509197746  
"Fbxw7",1546.25670078959,0.509451419340012,0.172037370048313,2.9612834  
6531305,0.00306359831544841,0.0137436174575559,2.18411031680232  
"Fmo5",7933.75431714194,-1.51221340531409,0.537109410472336,-2.8154662  
2686102,0.00487065160859656,0.0194846050604054,-5.95529389926257  
"Chd1l",923.224782162353,-0.28989805292013,0.17908264081828,-1.6187948  
2899908,0.105491415105319,0.205297096688643,-0.458994745572752  
"Acp6",3090.65075166977,0.917215163279151,0.17550518637447,5.226142783  
73583,1.73082719799502e-07,6.91550588248094e-06,10.8981161649792  
"Gpr89",1048.57841005051,0.030589772541211,0.172952137240491,0.1768684  
27469478,0.859611738830458,0.911029575198301,0.0028503524880521  
"Rnf115",1819.19374285671,-0.0683681290830859,0.182554236582103,-0.374  
508586396665,0.708025969619464,0.806372100212635,-0.0147135037072499  
"Polr3c",1794.74454557771,0.312485045276189,0.0907293817289059,3.44414  
388505232,0.000572870747606375,0.00382630759142687,1.73924645672377  
"Nudt17",127.241664920117,-0.324735441884986,0.28657486021486,-1.13316  
095362139,0.25714666810051,0.398019031088651,-0.299164298254026  
"Pias3",1339.51873600649,-0.393511378796865,0.103835586019659,-3.78975  
449440198,0.000150796247903649,0.00136782233847703,-2.59502469328261  
"Pex11b",1396.37836873267,0.231305957912428,0.135902719486626,1.701996

53683303,0.0887560174721538,0.180130349017643,0.39647565085462  
"Polr3gl",1822.23001880247,-0.117895330936585,0.174488815283855,-0.675  
66124937461,0.4992557442634,0.634706168197677,-0.0535944056670395  
"Rprd2",1563.10906620164,-0.035892848947527,0.107761467391557,-0.33307  
6839211073,0.739076281797044,0.82981166316243,-0.00669604484151271  
"Tars2",2110.0578421344,0.303802964512101,0.178125072828647,1.70555980  
518449,0.0880900684628795,0.179082489301348,0.522513375484192  
"Ecm1",6185.84316917148,-0.0721211284572768,0.408712618058197,-0.17645  
9265681412,0.859933147758309,0.911149685631535,-0.0067107329684442  
"Hormad1",0.552162964512389,0.335098517720611,3.11376845705249,0.10761  
8315986738,0.914298467317918,NA,NA  
"Ctsk",1166.32822563283,-1.37821352041307,0.360332900343803,-3.8248339  
7740833,0.000130860241150561,0.00122551055809493,-9.24009161107677  
"Mettl14",838.526062417475,-0.105746808682463,0.123337311747376,-0.857  
378900061138,0.391235516459044,0.535695933983037,-0.0660059488943507  
"Bnpl",106.987949484958,-1.62333313280148,0.501158347899571,-3.239162  
11234456,0.00119881414320127,0.00674977711930073,-8.11381800329511  
"Myoz2",1.657335033859,-2.02858552816542,1.51968257438508,-1.334874507  
58344,0.181917422501183,0.31000051598742,-2.3758414705823  
"Bcar3",1229.44289776044,-0.10650375744032,0.221889737375784,-0.479985  
053386896,0.631238021084868,0.74661200761491,-0.0311214235092238  
"Gclm",9867.6209254319,1.50484374655956,0.292720104954581,5.1408964436  
9681,2.73430734145277e-07,9.90957705272231e-06,17.3388230249728  
"Abca4",274.307308726249,1.09600281623579,0.445986870805376,2.45747775  
995423,0.0139916473746087,0.043944771345058,3.42481330691871  
"Pip5k1a",1468.5041993775,0.0267387979278648,0.137409257343374,0.19459  
2405525101,0.845712048921057,0.90127792211635,0.00277927368788038  
"Abcd3",10272.2409688072,0.862244115532264,0.336932741369024,2.5590986  
2611985,0.010494396360174,0.0352428074803088,2.88463235437387  
"F3",2166.90064641514,-0.559844441372141,0.181967119195008,-3.07662419  
369388,0.00209359067962549,0.0103317719745224,-2.55990632861814  
"Tmem56",680.481804750374,0.368079165452678,0.540225888658582,0.681343  
069964018,0.49565443652985,0.631527818300923,0.169174075114447  
"Rwdd3",332.078886079023,-0.126356474934549,0.39859097586307,-0.317007  
866675729,0.751237633140053,0.838204942544478,-0.0223009887130681  
"Ptbp2",1863.22986985666,-0.123944222811468,0.149738351349178,-0.82773  
8663439938,0.407818517898053,0.551508751601596,-0.0737589060200995  
"Snx27",2976.52373708887,0.580787647012837,0.141666839398736,4.0996725  
0965591,4.13735177538213e-05,0.000500745406060837,4.41364505415282  
"Celf3",49.2289121010191,-0.955074058296876,0.956618180706082,-0.99838  
5852955391,0.318092290969998,0.46319368852375,-0.735034525594463  
"Adh5",7343.22747858023,0.717465781082601,0.24233294915773,2.960661286  
78035,0.00306979340610253,0.0137628953396613,3.07489981472111  
"Riad1",26.7468188186271,-0.656909447655448,0.476998520360361,-1.3771  
7292531467,0.168458790450264,0.292381119476521,-0.807799658553054  
"Mrpl9",2765.92082919109,-0.00706300989092869,0.236318998927493,-0.029  
8876092188244,0.976156687847161,0.984997314063238,-0.00010676703305985  
9  
"Oaz3",5.87890837102351,-0.0783115353228375,0.840415292844168,-0.09318  
19494357514,0.925759014253985,0.954545175035653,-0.0036430767787817

"Them4",829.425821932634,1.18845092726279,0.175246882928376,6.78158097  
538613,1.18867820963877e-11,4.65112049330873e-09,22.8018068854916  
"Them5",2.36840316382187,-1.28069060895163,1.58197968870255,-0.8095493  
37515188,0.418199235777111,0.561303001251608,-0.739591667715367  
"Rap1gds1",2138.1385490586,-0.429636240453547,0.119865623525572,-3.584  
31573471012,0.0003379630602511,0.00253934633864198,-2.56744111659843  
"Rorc",1737.26099331727,0.482064142154617,0.352363729399634,1.36808672  
95166,0.171284930056288,0.296178925703929,0.586571564392551  
"Tspan5",1088.97647787744,0.308831666205199,0.123231741122821,2.506104  
86706828,0.0122069409731103,0.0394776803937144,0.998150066250185  
"Eif4e",3532.32729139146,-0.185545106350348,0.17416389202882,-1.065347  
72615006,0.286718602789412,0.430795971117204,-0.156251372213874  
"Mttp",622.670531352301,0.748637550203939,0.260822224834513,2.87029815  
300033,0.00410084921614568,0.0171143745754299,3.04533518953369  
"Dapp1",917.079798196427,-1.01401434992424,0.237868939210695,-4.262911  
9770281,2.01780017949319e-05,0.000290783946044037,-8.25704789071371  
"Ppp3ca",6368.21141289194,0.382950784278761,0.151124097908447,2.534015  
35280467,0.0112763791087347,0.0372466271153837,1.2599823288792  
"Nfkb1",3757.45124805511,-0.712613738580979,0.210077974114814,-3.39213  
923584161,0.000693491896918257,0.0044318928240289,-3.86160290613452  
"Manba",3592.42321616139,0.519714337980046,0.293464792700392,1.7709597  
5703852,0.0765673940319805,0.160683569996293,0.950203209792737  
"Cisd2",3343.31017838913,0.301650510973251,0.0859180954547233,3.510907  
7939491,0.000446579269183357,0.00315943490222681,1.73671121805135  
"Bdh2",6500.32778609116,2.17353259178181,0.674311717899258,3.223335045  
33067,0.00126707253266191,0.00705263495342333,10.7684498461612  
"Tacr3",5.00532402300934,0.429108515401297,0.860946997630149,0.4984145  
55811758,0.618191879434914,0.736586730947321,0.131190612231432  
"Wls",8221.96744849108,0.336503135312737,0.127956302284498,2.629828537  
59368,0.00854279427713711,0.0299097509096102,1.18098155571798  
"Depdc1a",49.7318642638453,-1.37899619303822,0.458732989379236,-3.0060  
9771907685,0.00264623941703359,0.0123299913150192,-6.06168206432737  
"Lrrc7",16.5554891396364,0.976824275263279,0.649482150923391,1.5040048  
0424981,0.132580129726846,0.243711451816163,1.37905152749253  
"Cth",4028.62687346753,2.02783437386333,0.51587520287901,3.93086227550  
062,8.46417499786679e-05,0.000868602547938983,14.2934438697777  
"Zranb2",4658.52133973195,0.121809437072282,0.0994561084830264,1.22475  
571315029,0.220667275753393,0.35650929594402,0.125633639950439  
"Lrriq3",90.8956110564804,0.913985940409015,0.27228119192393,3.3567722  
1754033,0.000788580502813266,0.00490550454794146,4.8600263966755  
"Adgrl2",1709.18232299415,-0.188351300843989,0.106913114775143,-1.7617  
2307055242,0.0781160979579452,0.163353461817248,-0.341262222874047  
"Dnase2b",1.84350750534439,-2.08637870862759,1.70427675364747,-1.22420  
182295062,0.220876101675977,0.35665774165451,-2.15101193342271  
"Uox",23.8819068988928,-0.330632115178106,0.659345870960586,-0.5014547  
44376295,0.616051120148983,0.735024154978881,-0.101785730278473  
"Rpf1",1207.04402267241,0.319643172368049,0.127677653956085,2.50351696  
216153,0.0122965785996724,0.0396885763178965,1.0313900296967  
"Spata1",272.211760292332,0.532479134013573,0.266914023678856,1.994946  
26274953,0.0460487410750101,0.109069284922321,1.17985233294051

"Ctbs",1230.56325373828,1.01520701861409,0.294136294985507,3.451485028  
95269,0.000557510685297134,0.00375773821588713,5.66885309063295  
"Bcl10",1457.73672852346,-0.319140048914657,0.140801903847994,-2.26658  
90175689,0.0234153436113993,0.0650097580447032,-0.872279293211918  
"Ddah1",6197.68602423612,1.78977395109782,0.568767401899969,3.14675901  
804336,0.00165090964633465,0.00866472039952435,8.4987337749768  
"Ccn1",5511.74589276397,-0.486844016869443,0.317902515163256,-1.531425  
49570402,0.125664266898875,0.23451396209746,-0.706040741515279  
"Col24a1",48.2873891156306,0.385591732054499,0.452131262869339,0.85283  
1387078692,0.393752815452533,0.538212447023555,0.238874815961969  
"Cryz",10503.3367932055,1.74041295308554,0.527884144015673,3.296960086  
4425,0.000977373896637406,0.00576780757767438,8.9726350018364  
"Asph",2939.60357210391,-0.381880717363751,0.286938095158465,-1.330881  
90033761,0.183227873657982,0.311389966057992,-0.445543762342338  
"Trp53inp1",2531.31900882599,-0.320644580485992,0.187077247248693,-1.7  
139688829168,0.0865344408672348,0.176508895075776,-0.556120832277641  
"Ccne2",96.9734030274351,-0.49047006725247,0.29941398866946,-1.6381000  
4145774,0.101400826356398,0.199426398254695,-0.790789814622779  
"Gem",954.42678227716,-0.935175068350021,0.244184242244739,-3.82979286  
358995,0.000128251167966339,0.00120629101447548,-6.28456808065946  
"Cdh17",15.9372457498667,-1.92973110659077,0.801153153503644,-2.408691  
8938677,0.0160098073491295,0.0485322176140124,-5.83845437790426  
"Fam92a",909.752521605428,0.494135881214512,0.14889991076499,3.3185774  
1670787,0.000904772384713028,0.00545493257796371,2.57505820855193  
"Pip4p2",1780.21651262824,0.176853452313834,0.166601161016906,1.061537  
93427579,0.288445502906535,0.432452171941507,0.148253338744481  
"Calb1",8275.86758706061,2.3041179702575,1.04597693571033,2.2028382190  
7865,0.0276061533404743,0.0738563087037004,6.0036877724889  
"Decr1",9223.273201155,0.192625594451308,0.510712816453666,0.377170081  
199212,0.706047212931137,0.804682520325656,0.0418589794398533  
"Nbn",878.723443983522,0.0492078555155121,0.185947381156132,0.26463322  
6935283,0.791292020998258,0.865657399170961,0.0070990235180416  
"Mmp16",30.2966122969455,-0.0533574495104321,0.548837156800045,-0.0972  
190910351785,0.922552407405413,0.952296407411232,-0.00260805559068138  
"Cpne3",2166.0929549428,-0.366214825848833,0.156637442046808,-2.337977  
56822022,0.019388411828916,0.0560966395370536,-1.05494749364532  
"Rmdn1",646.739428377879,0.0127647699972271,0.356835059319955,0.035772  
1856746751,0.971464011483228,0.982550331771967,0.000224707287346224  
"Tmem68",902.374623301595,-0.232669590480038,0.113511090578796,-2.0497  
5204884077,0.0403886330367701,0.0986221123294857,-0.538969748269097  
"Tgs1",1491.87138023282,0.162818590337537,0.271734193708113,0.59918329  
789747,0.549050659285946,0.678802216394482,0.0630800705896153  
"Rps20",12829.780805658,0.193118383458641,0.219253442625627,0.88079977  
7399113,0.378426200263776,0.523301705868305,0.125062906200862  
"Atp6v0d2",1649.57641025033,0.533478555477341,0.39731443665569,1.34271  
122883876,0.179365497332022,0.306707295890264,0.630497723000793  
"Cyp7a1",0.893155919996283,2.64026475859727,1.82656873117534,1.4454779  
13606,0.14832369240256,NA,NA  
"Ubxn2b",1138.21100892498,0.490271014478402,0.112853503360348,4.344313  
64450367,1.39711785855756e-05,0.000220753679142263,4.12732842088386



"Nsmaf",2338.35219971382,-0.187196311459399,0.144746598785712,-1.29326  
915471451,0.195917984949346,0.326636072727007,-0.209455573130069  
"Faxc",23.4231729094525,-1.1527071005576,0.472334991042998,-2.44044401  
20183,0.014669219617948,0.0454844580465273,-3.56230826354262  
"Coq3",1067.4595979678,0.407211238821067,0.342151938481938,1.190147396  
58581,0.233988464225754,0.371660726802096,0.403047041956416  
"Pnir",12125.7151673026,0.247407976908405,0.161226762134403,1.5345341  
7803031,0.124898291673061,0.233464374560574,0.359910763420486  
"Sdcbp",8525.95023819218,-0.539158940087446,0.16366867906979,-3.294209  
63834835,0.000986988576507604,0.00581398890173573,-2.77531438216449  
"Tstd3",514.152637332925,0.42880993246792,0.300586819695944,1.42657596  
531238,0.153702156097952,0.273189119379933,0.556419899927083  
"Ccnc",1057.94176709934,-0.161870784384261,0.152755654558686,-1.059671  
30874407,0.289294159936378,0.43316368687141,-0.135427507115458  
"Clca1",2.47484113342608,-0.263648550760893,1.34824038481102,-0.195550  
106443257,0.844962315467299,0.900720312010354,-0.0275672214144456  
"Odf2l",1373.12130021159,0.676468745926491,0.233453361593246,2.8976611  
9155365,0.00375956488075196,0.0160262224873938,2.79620317402389  
"Fhl5",2.52272669649324,-1.54533484570068,1.07322619481698,-1.43989669  
015134,0.149896629658008,0.26781677678657,-2.03590479372892  
"Ndufaf4",2356.86721443746,0.976919726434791,0.20097818557672,4.860824  
68916442,1.16897742248548e-06,3.10951183951186e-05,10.1389220264584  
"Clca3a2",364.607672253815,-1.163814150776,0.527722217819153,-2.205353  
70973301,0.0274292836394478,0.0735445781630849,-3.03739613224055  
"Spaca1",18.3642742586582,-0.956253058466608,0.707589333026731,-1.3514  
2379037317,0.176559717192548,0.302989030612594,-1.14182226160859  
"Lmo4",4647.09698944198,0.436414458017206,0.1907176856413,2.2882747163  
6799,0.0221215279522783,0.0623032719938642,1.21137365013635  
"Gbp3",1767.6089829688,-0.931697956966772,0.332119946474538,-2.8053056  
3387345,0.00502688888682092,0.0199662414983162,-3.64639780685846  
"Gbp2",2235.46040909515,-1.48844217475665,0.542691198045191,-2.7427055  
7569039,0.00609352942839969,0.0231196024119356,-5.60707246009788  
"Gtf2b",1307.51659852336,0.0716802556779026,0.18865194623276,0.3799603  
296404,0.703974862989348,0.80354184981655,0.0156783363746475  
"Pdlim5",3497.90376651976,-0.511488898300694,0.147177620147517,-3.4753  
1708820964,0.000510249830249318,0.00351798132609661,-2.88984472857551  
"Rngtt",703.963872452131,-0.386466208219462,0.177263539039225,-2.18017  
879093537,0.0292442111097098,0.0771122398340087,-0.990317053123853  
"Ube2j1",2229.05839759637,-0.341039678347243,0.125448510719032,-2.7185  
6298964817,0.00655661703893653,0.0244859067276737,-1.26514042190982  
"Rragd",2056.46434899387,0.713123278752255,0.447510905660389,1.5935327  
3793385,0.111040730109662,0.213349640882754,1.10164920903568  
"Gabrr1",0.639795019950342,-1.739405439738,3.50539127350459,-0.4962086  
40925551,0.619747215154295,NA,NA  
"Casp8ap2",633.896109635572,0.0541590554381038,0.217720023647731,0.248  
755509625208,0.803549907614069,0.874797102102687,0.00724449413327379  
"Map3k7",2663.13198208254,-0.187974718841004,0.126973623343034,-1.4804  
2336582905,0.138760298163287,0.25254814651244,-0.258682042654936  
"Epha7",308.761722060214,-0.606663876195908,0.315142220534999,-1.92504  
792016128,0.0542233634797662,0.123582365999822,-1.26844159673643

"Akirin2",2356.98769010842,0.107363308784555,0.0999418013485692,1.07425829168419,0.282706932852754,0.426622495788285,0.0914580510244295  
"Rars2",1153.21903123606,0.483547002208516,0.192383521798882,2.51345332327378,0.0119555597644014,0.0388710195574952,1.57032193820826  
"Slc35a1",1617.17136229089,0.134900113812373,0.137247438415837,0.982897133596383,0.325658068732924,0.470521009570549,0.101703174415987  
"Cfap206",11.4756184633487,-1.28698824165913,0.724333638319258,-1.77678927716992,0.0756029167755038,0.159173487883465,-2.36517622248414  
"Smim8",883.477068653418,0.887119734218039,0.230797156853327,3.84372037469165,0.00012118307830043,0.00115598222147837,5.99941767498328  
"C9orf72",1103.97069177686,-1.02166455432636,0.342251637225672,-2.98512685756037,0.0028346074111948,0.0129405701951478,-4.44157214824815  
"Aldob",107420.739591887,2.14659674576319,0.798149547017882,2.68946684713847,0.00715662553407752,0.0262095951659361,7.81711047950695  
"Rnf20",3170.82202460482,0.140679261942594,0.122210466703581,1.15112285990863,0.24968169467767,0.38924551713642,0.132737212099969  
"Ppp3r2",0.269403261492963,0,4.78471990594841,0,1,NA,NA  
"Smc2",721.896976487902,0.48456885397675,0.333956108589783,1.45099562940462,0.146781077235936,0.263554419739045,0.646170340572009  
"Polr1e",516.187907535924,0.511369666862349,0.1346799302484,3.7969255398276,0.000146501770717346,0.00134044651593,3.38258378213916  
"Exosc3",1049.15360010247,0.0662809921390376,0.202018650234084,0.328093431285854,0.742841020432019,0.832478429265397,0.0121524852426543  
"Stra6l",881.165712315162,0.667672842321574,0.501444942588809,1.33149780886129,0.183025265491976,0.311177045582018,0.779436769589309  
"Tmod1",389.515680280514,0.285744835888083,0.320791990784347,0.890748036412718,0.373064358040684,0.518350235379267,0.187764113251191  
"Xpa",718.479451225491,0.618272519780769,0.10020413133794,6.1701300288272,6.8233855829219e-10,1.1803365705416e-07,9.86286625897201  
"Ncbp1",2153.76949722306,-0.126221078837773,0.130969012157907,-0.963747658763662,0.335172453989076,0.479788011737684,-0.0926981379820982  
"Trmo",258.531097063808,0.0813645614741666,0.141160562687336,0.576397259441259,0.564346696395022,0.692182920444747,0.0299344308110875  
"Hemgn",3.42872024767577,0.398647909211161,1.02699583563108,0.388168963670817,0.69789099936686,0.798467240092421,0.0897202322280171  
"Anp32b",8398.19869561847,-0.110616249638051,0.154062453102759,-0.717996159416407,0.472759654879003,0.610478294069122,-0.0545905063699195  
"Nans",1242.86382350081,-0.45994464975326,0.175662027447826,-2.61834988719955,0.008835615705651,0.0307362774360006,-1.60167061061707  
"Coro2a",834.586233403427,-0.811557753590432,0.279164764887371,-2.90709235428709,0.00364805475908278,0.015687908576838,-3.37191292022847  
"Col15a1",5217.82412186292,-1.24790746508774,0.26837325241094,-4.64989507664092,3.32103937558255e-06,7.16301169746777e-05,-11.9100225377503  
"Nr4a3",319.629334720364,-3.06955037215545,0.627844724961916,-4.88902789195473,1.01335138655186e-06,2.81057259388167e-05,-32.1674674114793  
"Erp44",2922.49819397897,0.758325229552269,0.123757014655927,6.12753330920746,8.92519187262565e-10,1.45019492610379e-07,11.9408906290627  
"Invs",1066.35799203673,0.406149289947172,0.225978260978842,1.79729363429874,0.0722890162703474,0.15375708947739,0.760466320452055  
"Tex10",711.658334795399,-0.40072421788936,0.126537768093842,-3.166834

88199489,0.00154107793686279,0.00822245592804336,-1.92383142370696  
"Tmeff1",238.966592520013,-2.13716895886064,0.443015227099543,-4.82414  
334345312,1.40606272817557e-06,3.5884045908334e-05,-21.8743896943535  
"Cavin4",7.4535219989192,-0.616753749455149,0.86855521043194,-0.710091  
588937026,0.477647341842884,0.6150959560962,-0.299728135155867  
"Brinp1",7.60614665745194,-0.87835430161289,0.800838543091894,-1.09679  
324152122,0.272731785286702,0.415397890269667,-0.771650456393712  
"Fmn2",9.27741579285354,-0.28062154916889,0.784875525634325,-0.3575363  
736079,0.720690301008147,0.815318798320676,-0.0572962074917901  
"Ambp",126.104062065354,1.65911084369771,0.325324151764626,5.099869882  
69499,3.39887052735588e-07,1.18278652441857e-05,18.822699374526  
"Kif12",9729.84800749861,1.17237058394336,0.612747662148766,1.91330078  
654584,0.0557095571075412,0.126275859623673,2.42597050874703  
"Zfp618",2177.32504168509,0.191787035734751,0.499312714238006,0.384102  
047205897,0.700902814205989,0.800973102296822,0.042562896510374  
"Orm3",129.078731104403,-3.45238121830554,1.46848680200355,-2.35097871  
740844,0.0187241047794933,0.0546367247815865,-10.0362413934549  
"Slc44a5",5.92297209131928,-2.41235406407933,1.00388622892321,-2.40301  
539614393,0.0162605028149556,0.049131765672711,-7.26902466452373  
"Tnfsf8",143.16237514094,-1.82319690599848,0.608659226839422,-2.995431  
31131976,0.00274057018131893,0.0126474881409128,-7.96791132959317  
"Tnc",3504.51290166254,-1.71904163932787,0.383336128449143,-4.48442375  
176734,7.31112429280251e-06,0.000132581880464041,-15.3481368954258  
"Txn1",12809.9633809052,0.807587389080301,0.224611032927014,3.59549296  
646848,0.000323777876647918,0.0024564284197981,4.85283045312645  
"Svep1",1541.10370213146,-1.19132147532657,0.23084689586549,-5.1606562  
4733689,2.46085677018239e-07,9.08745933807127e-06,-13.8295925741783  
"Pappa",211.52531977213,1.1758230831017,0.324548162781013,3.6229540571  
9207,0.000291257570069639,0.00225982495074327,7.16366441823831  
"Astn2",230.055608922811,-0.618122028356414,0.350886884221798,-1.76159  
912539135,0.0781370518195676,0.163379757252325,-1.11983807319988  
"Ptgr1",1168.45301199107,-0.583253295078014,0.380743183750639,-1.53188  
112084498,0.125551773095078,0.234348886828244,-0.846268046670073  
"Ugcg",1455.84778241064,-0.624964057739384,0.142762268493044,-4.377655  
69527802,1.199626608875e-05,0.000195898824286807,-5.33588827477743  
"Ptbp3",5995.35518919282,-0.343581998673136,0.228794057921407,-1.50170  
857492794,0.133172388372227,0.244500492324076,-0.483948286292255  
"Hsd12",2778.2299505126,-0.218373709696185,0.422503167935929,-0.516856  
975920476,0.6052560033382,0.726232710959275,-0.0698544254304507  
"Snx30",1093.82253245452,-0.068116614742432,0.11816397617165,-0.576458  
383928136,0.564305391265922,0.692175800132294,-0.0250611453742682  
"Slc46a2",25.5249532484572,-2.0423057717671,0.692707885671356,-2.94829  
294427297,0.00319534111803124,0.0141661575987661,-8.69389026871653  
"Zfp37",170.604218728369,-0.872275614230123,0.243057043103676,-3.58876  
913456918,0.000332242891941451,0.00250699377208762,-5.22377162611559  
"Wdr31",1171.28042994719,0.933440433618482,0.314577472016503,2.9672831  
5487738,0.00300444127780787,0.0135529537335495,4.01486803765706  
"Bspry",1815.97718123669,0.042771388889287,0.390184277360979,0.1096184  
32548262,0.912711991694931,0.946353538447837,0.00235837419777275  
"Alad",3546.75087796134,0.697083967569412,0.198210972278879,3.51687880

622789,0.000436653104232254,0.00310045965998561,4.0264998299306  
"Pole3",1548.38355460987,0.25649078667628,0.120324733634291,2.13165472  
242678,0.0330352415663581,0.0847081983246778,0.63315850767432  
"Kdm4c",1015.6730317432,-0.162267712623067,0.127923219834577,-1.268477  
39474431,0.20462751834748,0.337133488906033,-0.176429841037581  
"Dmac1",1344.33812746517,-0.0235453214543973,0.247836680624777,-0.0950  
033763970749,0.924312145076176,0.953406242643775,-0.00112344590529699  
"Ptprd",7213.75347623082,0.58983523288029,0.110927811789207,5.31728899  
512717,1.05324713586172e-07,4.74277428522677e-06,7.23072423601068  
"Mpdz",1098.33490166482,-1.14966266309343,0.224315947844849,-5.1251936  
1257636,2.97232148611341e-07,1.05756066307006e-05,-13.1716396849791  
"Zdhhc21",1329.36043119126,0.251478064654048,0.0964837447352553,2.6064  
2935599242,0.00914916947845513,0.0315679537233973,0.869010818040532  
"Aco1",8804.59725006126,0.420896973555273,0.349941699492728,1.20276312  
93024,0.229067996589037,0.365616224418226,0.423494355243079  
"Smim27",409.658608071164,0.628759324863237,0.220682610030725,2.849156  
64526397,0.00438352921176755,0.0179634410615897,2.5272456920323  
"Smu1",2689.05529435436,0.0574432410878824,0.109700820314209,0.5236354  
74405311,0.600532103012109,0.722231598322123,0.0186925716634655  
"Dnaja1",17469.1437354966,-0.0284641602910538,0.238364542746558,-0.119  
414406031515,0.904947048597699,0.94200296586183,-0.0017006440842901  
"Aptx",937.556381054642,-0.168870846400565,0.170877817081136,-0.988254  
937271245,0.323027808783889,0.468073440522315,-0.128194937648764  
"Slc44a1",3070.20817863902,-0.544415564423881,0.224284847454945,-2.427  
33992332337,0.0152099973758016,0.0466443109206322,-1.66874493533264  
"B4galt1",4087.35569109578,-0.373042730598212,0.164479022653349,-2.268  
02618705017,0.0233276106262496,0.0648715485999973,-1.02040099307827  
"Fktn",1876.34597122733,0.279286540427933,0.144033419252768,1.93903985  
531168,0.0524964853139122,0.120676311088265,0.590591448605625  
"Spink4",4.92363443206515,4.24901786842124,0.973839894848514,4.3631585  
5501298,1.28197960161871e-05,0.000205728710060589,36.0697095758451  
"Bag1",9933.11330696489,0.215242853358781,0.314206385585526,0.68503653  
4052847,0.493320867223408,0.629542633496221,0.0996061491257727  
"Tal2",35.9973882173093,0.249396462859998,0.507608106231614,0.49131694  
2732594,0.623202298458144,0.740791222053093,0.074828028112276  
"Chmp5",4407.01320860031,-0.0447349653301091,0.28978167431339,-0.15437  
4721714561,0.87731428386889,0.923443851591212,-0.00356292887384504  
"Tmem38b",1694.74431698667,0.43002234722187,0.265021980368179,1.622591  
25308952,0.104676811573051,0.204078439361199,0.683413381860127  
"Nfx1",3173.08259024806,0.138413904413077,0.142046007138426,0.97443009  
6286977,0.329843032084181,0.474471957435559,0.103194868715829  
"Rad23b",5894.38791331841,-0.275420340896331,0.199960739342939,-1.3773  
7208714745,0.168397238188736,0.292326331036678,-0.338735216154702  
"Aqp7",1582.65723088201,-0.75968726192493,0.770560692814008,-0.9858889  
36471221,0.324187616513185,0.469022048436157,-0.575163404321224  
"Nol6",1792.3594908919,-0.261560465344814,0.191299350097816,-1.3672836  
0661482,0.171536428063723,0.296508623615821,-0.317973558740381  
"Elp1",1181.08165334861,-0.0224194205817891,0.0808817155317631,-0.2771  
87747989653,0.781635946876513,0.858900906909279,-0.00341003248377828  
"Ubp2",2769.52991658408,0.0142751662880543,0.18407000308252,0.0775529

203509312,0.938183693645314,0.961736711162456,0.000556939257373321  
"Epb41l4b",1509.32989006185,0.308221496058066,0.175068342301938,1.7605  
7813768797,0.0783098316156907,0.163600674685818,0.557981613328959  
"Aqp3",3827.05767387571,-0.55368240288304,0.670328384133108,-0.8259868  
08837107,0.40881157472853,0.552621192738275,-0.328379352717522  
"Dcaf12",2547.25412982062,-0.0725706342631158,0.071292958902477,-1.017  
92148033001,0.308715272583974,0.453604399762045,-0.0573692509466787  
"Ubap1",2378.63592870099,-0.00593346493416164,0.17359873996388,-0.0341  
791935551848,0.972734257983416,0.983326857669524,-9.9763521666746e-05  
"Kif24",158.99646055363,0.36239137991468,0.219281302152782,1.652632378  
39671,0.0984057042894752,0.194872890292855,0.592657681252559  
"Fam219a",1183.02849512918,-0.327687071463374,0.1384453844958,-2.36690  
499041746,0.0179375369447833,0.0528397182881681,-0.963561254988083  
"1110017D15Rik",15.26512978029,-1.27875428066523,0.714298529031981,-1.  
79022387516071,0.0734179283884228,0.155818304965437,-2.37728689494509  
"Nudt2",714.198586167532,0.129428646645714,0.260789991980539,0.4962945  
30563781,0.619686624599182,0.737826685786202,0.0393523043713808  
"Cntfr",428.959988763453,-0.365316465229413,0.38299232561892,-0.953848  
003714061,0.34016058648424,0.484828297899832,-0.264474681939424  
"Enho",389.779334250404,-2.25797243625349,0.520533914718003,-4.3378008  
0876524,1.43915492177533e-05,0.000224664873216776,-18.9690022619997  
"Dctn3",2666.37000501964,0.25648157701453,0.274409430213226,0.93466750  
3282357,0.349959679126568,0.494959656434776,0.180378112614787  
"1700022I11Rik",0.35099700026186,-1.07747086923113,4.78001494840159,-0  
.225411610813357,0.821659079933927,NA,NA  
"Vcp",18537.8355879862,-0.0377019876123637,0.202257863464652,-0.186405  
54669437,0.852126743029962,0.905988369724028,-0.00372227237050056  
"Fancg",504.70893029057,-0.396871974313109,0.153767371705847,-2.580989  
51624351,0.00985175735137584,0.0333778566180931,-1.34931017228392  
"Pigo",1459.2695491036,0.426033400876985,0.181634371969117,2.345554953  
38417,0.0189987776803782,0.0552480488011951,1.23375960698295  
"Stoml2",2380.1381121832,0.177356560044304,0.209648973052808,0.8459691  
33364801,0.397569963721358,0.542123166140222,0.108588692728724  
"Unc13b",1307.08141442955,-0.124725313878866,0.223413802299251,-0.5582  
70404940348,0.576659750849561,0.702029958920126,-0.044125221681813  
"Atp8b5",72.7019129004496,0.669761804762288,0.341573551558268,1.960812  
83725516,0.0499008599930454,0.116202910324185,1.44160695509777  
"Tesk1",2054.37884962101,0.0597206481487371,0.143725756529506,0.415518  
064338572,0.677762693918052,0.78297292368848,0.0146110843968633  
"Cd72",1972.03571210043,-0.89329490599802,0.460583171425322,-1.9394866  
3654737,0.0524421101898493,0.120593969156938,-1.88960994294252  
"Sit1",47.5700241844378,-1.49425147884445,0.564698855023456,-2.6461032  
5583605,0.00814249577397785,0.0288763882504584,-5.29671958870092  
"Ccgc107",6807.19250279409,1.83206291648598,0.400212640303587,4.577723  
76978459,4.70062842168897e-06,9.4573896198323e-05,16.9761314278018  
"Car9",270.541204924345,1.90870459790756,0.366153843572418,5.212848728  
51556,1.85962535754472e-07,7.26068050717993e-06,22.5857721286312  
"Tpm2",3071.70307876411,-1.47801045667794,0.252714242105661,-5.8485443  
6522012,4.95893385922016e-09,4.76301932941255e-07,-21.5157143212941  
"Tln1",12948.851932713,0.0625901197380529,0.203583543595761,0.30744194

0701911,0.75850700886456,0.84337190116567,0.010662055047871  
"Creb3",2570.66713008592,0.069103284138989,0.0954230957049207,0.724177  
764601966,0.468956607617962,0.607029383948134,0.0344948447405564  
"Gba2",1116.17627202853,-0.285117086131675,0.186610852469708,-1.527869  
80155915,0.126544867319174,0.235571111608674,-0.412205874921621  
"Rgp1",3198.22790918381,-0.231263712620869,0.217971227504083,-1.060982  
7511135,0.28869774012124,0.432680042314775,-0.193742737763628  
"Npr2",1747.69078483651,0.0806796937178672,0.295744237722698,0.2728022  
50820237,0.785005229265436,0.861018238024753,0.0120728764832124  
"Hint2",4866.17114901844,1.34017605741243,0.328271396765183,4.08252461  
414137,4.4549091940749e-05,0.000530940216785284,10.106081537562  
"Spaar",197.911464268689,-1.50270208415415,0.564354463543006,-2.662691  
94491742,0.00775183444514495,0.0278053628465892,-5.38346984084168  
"Reck",561.704317794136,-0.990598179483924,0.229643597892575,-4.313632  
90148118,1.60593525342046e-05,0.000242732756365831,-8.24529296951272  
"Clta",6761.74941017544,-0.0720289019714472,0.334996905924908,-0.21501  
3633551568,0.829756689109473,0.891333586262823,-0.00828595467045781  
"Gne",1440.99775206363,0.207397695324487,0.175954680465889,1.178699508  
16508,0.238517851566546,0.376663950077401,0.202503497165614  
"Glipr2",730.424094237747,-1.55507086310744,0.314080153832116,-4.95119  
11024428,7.37606266198735e-07,2.15297110454236e-05,-16.7109107186571  
"Snapc3",811.690136367886,-0.0684274830190127,0.174031650774419,-0.393  
189875028589,0.694179247317937,0.796135931074945,-0.0156004629838153  
"Psp1",3040.0612563731,0.074657764075504,0.217208047264743,0.34371546  
0894079,0.731060282723199,0.823832860708391,0.0144677495631217  
"Bnc2",331.441558806658,0.946431787131392,0.415463408951549,2.27801478  
238428,0.0227256968771425,0.0635032150631473,2.608995139665  
"Sh3gl2",1546.26087019561,-0.717187778372095,0.400255155150547,-1.7918  
2646155386,0.0731607686593869,0.155407851325932,-1.33519015014802  
"Saxo1",3.52038498022816,-0.12029844996672,1.07408534335946,-0.1120008  
30018273,0.910822748453423,0.945169934243248,-0.0067836949227636  
"Plin2",9541.49596391089,-2.15964926341322,0.653105967613083,-3.306736  
38047762,0.000943896751862055,0.00562128859737518,-11.1895625692877  
"Rps6",25347.4881747271,-0.370953396847608,0.193248381916507,-1.919567  
93205068,0.054912497901464,0.124788331478175,-0.772004589131819  
"Mllt3",788.525615828088,-0.0518055531172354,0.3179551562143,-0.162933  
520984698,0.870570777550058,0.918676680233319,-0.00439420065835833  
"Hacd4",1058.44952022664,-0.459906901604227,0.331110257328952,-1.38898  
415686143,0.164837567743464,0.287580788820871,-0.573159644656342  
"Usp24",4877.63119597245,0.441099287334317,0.15477174832829,2.84999873  
748723,0.00437194026376912,0.0179285511635273,1.7738193829004  
"Plpp3",3657.46655610073,-0.844043876198191,0.282385838100521,-2.98897  
381637721,0.00279916118219265,0.0128418928777393,-3.67584701280459  
"Prkaa2",3266.54414953123,1.29721580001459,0.324165303248262,4.0017108  
1548822,6.28861294996576e-05,0.000690088293617841,9.44203297743778  
"Dab1",260.015843670121,0.667177107626377,0.275711904593602,2.41983424  
186849,0.015527583314291,0.0473506934602932,2.03500614301196  
"Slc35d1",2073.35723371853,0.904750358445026,0.138984775746382,6.50970  
837335455,7.52968403471723e-11,1.93176025406469e-08,16.0704012472177  
"Mier1",3002.65743021427,-0.139462010797946,0.0953575764290447,-1.4625

1630987831,0.143599778255268,0.259284797271773,-0.188249757519337  
"Tctex1d1",0.490784232825913,-2.1731878428611,3.69007208043407,-0.5889  
28290692214,0.5559093787867,NA,NA  
"Sgip1",255.934375861848,-0.247946317415807,0.271245407120128,-0.91410  
3283990342,0.360662577098491,0.505949991241555,-0.168930151755916  
"Pde4b",858.077066330997,-0.590100507823852,0.145688691660088,-4.05042  
080548461,5.11256104969015e-05,0.000588068177193943,-4.38956156911499  
"Ak4",7641.65827473124,2.39930390601358,0.792463583132949,3.0276519414  
66,0.00246461778001703,0.0116979351204411,10.6729265868781  
"Dnajc6",565.629041495069,1.62242904298642,0.463607951742241,3.4995712  
1505212,0.000466007106306391,0.00326606993485335,9.2870562019183  
"Jak1",5979.2849143896,-0.415266887500943,0.0986008175840379,-4.211596  
79682178,2.53571853951337e-05,0.000345502725949906,-3.30988888984284  
"Cachd1",1454.18096361286,0.154951949263563,0.233427384103021,0.663812  
216629976,0.506810505674223,0.641412370501258,0.068811480803512  
"2610528J11Rik",1502.69570429696,1.6032403894834,0.47967883427298,3.34  
232047556013,0.000830810780787165,0.00510691948417028,8.46055428574348  
"St3gal3",1765.36004145344,-0.0536377109939317,0.15117743784388,-0.354  
799709261663,0.722739646202851,0.816973599725387,-0.0108427827308447  
"Artn",140.605928329747,-0.808596590174951,0.370730202010867,-2.181091  
76373833,0.0291766299147761,0.0770013440820662,-2.07318699742907  
"Dph2",442.306980850583,-0.0248168503319717,0.142840409453949,-0.17373  
8302955317,0.862071133871386,0.912858294041004,-0.00226266688841176  
"B4galt2",456.633998845564,-0.496263761230885,0.23037333624091,-2.1541  
7187305011,0.0312266957646114,0.0810837813315213,-1.246749711475  
"Slc6a9",1574.32168081121,0.171940533414757,0.162633544399024,1.057226  
7489473,0.290408114738945,0.434164807635328,0.14345533022958  
"Slc5a9",932.221778048357,1.79641675400398,0.456228323262942,3.9375388  
6465448,8.23216019116667e-05,0.000850612927437031,12.6998641301972  
"Bend5",1470.61538324232,1.79505209509636,0.528467104341302,3.39671491  
441983,0.000681999788996193,0.0043742210150815,9.75077113951645  
"Elavl4",5.69506227315206,-0.0750899617534836,0.724396850459105,-0.103  
658597778129,0.917440283777101,0.949331351328659,-0.00390448149372151  
"Itgb3bp",346.470525708927,0.65035738216158,0.232298132693124,2.799666  
85320165,0.0051155371360575,0.0202194897788058,2.53711458099619  
"Atg4c",684.680762661657,-0.0555210553260783,0.177204281486668,-0.3133  
16669666671,0.754040086704643,0.840195581302428,-0.00966735832020917  
"Cdkn2c",927.624656147514,-1.16626700678478,0.483382235702508,-2.41272  
210818799,0.0158338867739131,0.0480811593704653,-3.53946277455964  
"Eps15",3609.18447826261,-0.0935007442156731,0.135673204520698,-0.6891  
61463724467,0.490721664569815,0.627210161637643,-0.0436156295504632  
"Angptl3",87.6128725269414,1.31542581327559,0.468456473535628,2.808000  
07596767,0.00498502150485036,0.0198525223246675,5.15571177989101  
"Ttc39a",255.456886291532,-1.1315133324404,0.299989742455366,-3.771840  
07419438,0.000162048109875124,0.00144472521552134,-7.39991178186212  
"Dock7",3299.3186665526,-0.110892850474501,0.179011005779533,-0.619475  
042842195,0.535603458125316,0.667339524987374,-0.044851315283491  
"Rnf11",6748.21870387219,-0.25200903692753,0.360829583879069,-0.698415  
673732534,0.484917277102034,0.622361576417552,-0.119511264346629  
"Calr4",5.56600641919233,-0.887197551859725,0.787865178774918,-1.12607

788205498,0.260132555116536,0.401556848995505,-0.809484515089374  
"Osbpl9",9307.62097527938,1.12891009821768,0.192881747425539,5.8528612  
1307815,4.83187325177387e-09,4.67559815385824e-07,16.4546984370064  
"Usp1",1275.30151929775,-0.372592960063918,0.140675010299002,-2.648608  
01696036,0.00808240159779893,0.0287207337987759,-1.32275567529245  
"Tm2d1",1457.02722410608,0.505542364599001,0.3046132028812,1.659620659  
30597,0.0969907895696382,0.19273607980318,0.832341878712148  
"Nfia",5875.44138102367,0.300043891737759,0.185586805122369,1.61673073  
438557,0.105936416622229,0.205813895107634,0.474304265409748  
"Txndc12",2159.73629373716,-0.00372020576541574,0.17664531037753,-0.02  
10603143523303,0.983197542426626,0.989235031850681,-4.02650133148995e-  
05  
"Btf3l4",3052.47229411937,-0.0133677797907819,0.319825117253093,-0.041  
797154349836,0.966660403532195,0.979724739997439,-0.000273820579288901  
"Cyp2j13",6416.87960682339,1.51551855873474,0.61802730603965,2.4521870  
5375052,0.0141990828751154,0.0444316671319212,4.71902599237489  
"Hook1",1779.50372810477,0.654535578915748,0.21236274285081,3.08215824  
550531,0.00205505556658019,0.0102009861092619,3.00122293384454  
"Fggy",2742.54603354874,1.91018492121493,0.321731406431028,5.937203776  
29479,2.89924228228349e-09,3.21189920567974e-07,28.5596202808109  
"Eqtn",13.8879746019359,0.558820919807412,0.553991560966954,1.00871738  
701584,0.313110190767834,0.458266213751031,0.436050763976448  
"If74",822.250228970275,0.520885257092768,0.204358893622395,2.5488749  
1246276,0.0108071055524603,0.0360138342269477,1.73134557141006  
"Plaa",2698.94597413221,0.11730691727018,0.122776257667512,0.955452784  
59176,0.339348771508538,0.483954238361137,0.0851372460821603  
"Caap1",509.521750782948,-0.0188971835840527,0.13722336596832,-0.13771  
1121212515,0.890468729691578,0.932257264364604,-0.00132557067716559  
"Pum1",3075.05022812461,-0.112465848423457,0.0922932018730376,-1.21857  
131555767,0.223006941706216,0.358968822701873,-0.11522348168521  
"Laptm5",4321.54182991463,-1.36641228451674,0.401351995976012,-3.40452  
34562591,0.000662796077156735,0.00428191464783333,-7.45153129361031  
"Cc2d1b",3122.11842170802,0.23066066766068,0.181182975140067,1.2730813  
5591859,0.202989174081716,0.335073054202954,0.252205919143052  
"Pdnp",1608.42749308234,-0.890004999757286,0.279241382483502,-3.187224  
58627661,0.00143645188776411,0.00777566321699741,-4.32253758837041  
"Lrrc38",0.516905301515876,-2.10458901329418,2.33421138351777,-0.90162  
7431069442,0.367254814221981,NA,NA  
"Orc1",22.1012938616955,-0.542338088289164,0.463063492299389,-1.171195  
95327226,0.241520021531933,0.380077270365587,-0.524647401582388  
"Pramef12",36.0338494543021,-0.618470811514147,0.304063424715486,-2.03  
401909352581,0.0419496703858114,0.101601766478765,-1.41425371489789  
"Gpx7",379.470867539398,-1.34902446636993,0.244420984889445,-5.5192661  
4230815,3.40418290706318e-08,1.9992397084915e-06,-17.7029021761375  
"Tnfrsf1b",1558.11010363716,-1.54457267735106,0.321540746472837,-4.803  
66079352104,1.55790670333981e-06,3.89436729509225e-05,-15.682655324128  
8  
"Podn",1710.6482711559,-0.339075574024651,0.311002957253966,-1.0902647  
9046552,0.275596520290234,0.41902533941196,-0.294936033094881  
"Echdc2",8912.83156888748,1.2617629825587,0.260366630090849,4.84610098



505496,1.2591144376761e-06,3.29975985293126e-05,13.020227822047  
"Tnfrsf8",25.9722132896332,-0.938379763297162,0.509956484197165,-1.840  
11732839219,0.065751013770988,0.142970142356053,-1.82526074337267  
"Scp2",31661.4515590137,-0.0641051319231897,0.528007517910737,-0.12140  
9506017729,0.90336668786657,0.940860193366934,-0.00390789517977125  
"Cpt2",4940.06590464102,1.12580446603023,0.451110013060062,2.495631738  
23928,0.0125733057971727,0.0403246250689771,3.61472504569937  
"Czib",2580.03646652872,0.244551649650493,0.140834401735084,1.73644824  
444602,0.0824846081067272,0.170188877128568,0.433063412493737  
"Magoh",1714.20835230489,0.137118992632957,0.11480305230105,1.19438455  
585125,0.232327575321105,0.369491213261853,0.136519552131654  
"Dmrtb1",0.247153390650072,0.4.78471990595868,0,1,NA,NA  
"Lrp8",156.287758576436,-1.0788338115294,0.339626039343304,-3.17653444  
245741,0.00149046090017435,0.00799697485734713,-5.20935614289768  
"Ndc1",734.627800845394,-0.734493693151253,0.307066912128781,-2.391966  
2592732,0.0167583829011374,0.0502004839155597,-2.19740726654661  
"Lrrc42",904.166506879816,0.00193747906100275,0.226324181165092,0.0085  
6063656578283,0.99316968367967,0.995774283559737,8.20458447925537e-06  
"Tmem59",14290.9317780903,0.445177528274681,0.196521698034827,2.265284  
35651817,0.0234952353907313,0.0651650212871237,1.21570523458491  
"Tceanc2",927.83419867412,-0.025850133708287,0.196588763908979,-0.1314  
93444458787,0.895384972112729,0.935495455270281,-0.00172366084207048  
"Cyb5rl",989.954468722896,0.267750506067036,0.162515609223392,1.647537  
16487005,0.0994476837264841,0.196482316730517,0.435679029654241  
"Mrpl37",3396.48811841219,0.35108942579854,0.193510423203287,1.8143179  
0591307,0.0696287963981803,0.149468487523034,0.667305031558462  
"Col9a2",9.67589010580492,-3.61675121039014,0.937043698204069,-3.85974  
658099935,0.000113504673090468,0.00109668687607431,-24.6498289007903  
"Exo5",505.740687118982,-0.19743349629179,0.159208148443597,-1.2400966  
7986143,0.214939636871225,0.349707363127098,-0.207435196775615  
"Dyrk2",2290.11179898224,-0.109535078643531,0.100416572244673,-1.09080  
678811302,0.275357908921345,0.418760510736167,-0.0953454769193147  
"Kcnq4",113.154209648383,-2.66325726285843,0.610445048454112,-4.362812  
45888202,1.2840100856995e-05,0.000205885104037573,-22.6062397706449  
"Ctps",1454.25951669525,-0.0115988681063343,0.193230893100285,-0.06002  
59509244962,0.952134966102878,0.970226019466797,-0.000350589995592648  
"Hivep3",607.670624123707,-0.906427847394733,0.240832842613463,-3.7637  
2191416413,0.000167403035870706,0.00147827191730391,-5.90708286691881  
"Edn2",2.31164687389821,-0.0951274547272369,1.43639926358845,-0.066226  
3321477814,0.947197632767533,0.96734021808618,-0.0031587087496506  
"Ppcs",1372.18777906609,0.555537047531867,0.276923771278869,2.00610097  
48868,0.044845475878568,0.106945158049906,1.24186924727554  
"Ccadc30",339.034979446675,0.867295958211668,0.206424042773759,4.201525  
88117957,2.65121930357342e-05,0.00035460820897817,6.89023015080934  
"Ybx1",31459.077979974,0.225307398411529,0.246995420596871,0.912192614  
207456,0.361667331249642,0.506423787711954,0.15329497107004  
"Tfap2c",19.5920361998569,-2.4093868131469,0.797528288451843,-3.021067  
52579772,0.00251885179737693,0.0119031925218748,-10.675869212577  
"P3h1",1160.6726310668,-0.19405939936862,0.184684966989376,-1.05075904  
407413,0.293369270463494,0.4373510234343,-0.160490839328719

"Tmem269",11.1655678523485,0.546858083414352,0.475604879711422,1.14981596434873,0.250219678526218,0.389897170295228,0.51507044827965  
"Svbp",1219.27164361746,-0.00435284842048703,0.165814626859875,-0.0262512934046856,0.979056903739654,0.986669833155619,-5.84144033668179e-05  
"Ermap",26.818532263854,-0.570563042376716,0.436983974538022,-1.30568413402325,0.191659995674956,0.321488867487121,-0.647470582924354  
"Slc2a1",2195.27368107993,0.654807483025452,0.178905730309004,3.66006992562215,0.000252146430086885,0.00202318975054901,4.06182315504029  
"Rragc",3065.30077364113,-0.375189642221569,0.171589104158317,-2.18655866327852,0.0287747577731248,0.0762283466871084,-0.965746348864747  
"Mycbp",890.749658127898,0.551269361387737,0.211734149645368,2.60359210978038,0.00922524749490266,0.0317966900575591,1.90099345149607  
"Ndufs5",5252.70695074703,0.193527478836313,0.364440606795925,0.531026112972867,0.595400683842065,0.718119666803945,0.06408063628879  
"Macf1",10163.6708934981,-0.216687110583793,0.144142366814755,-1.50328536551831,0.132765472283846,0.243937163455562,-0.305711842820187  
"Ppie",1250.07459928133,-0.295277951746148,0.136380862233811,-2.16509814434172,0.0303801700604684,0.0794144732322045,-0.747961092742261  
"Trit1",1074.86860500883,-0.227850381290298,0.284205866001838,-0.801708931964216,0.422721347854745,0.565969981492263,-0.129695681259448  
"Mycl",727.807269176311,-2.14819662256252,0.44165409055899,-4.86397990754167,1.15048597638674e-06,3.07290076268339e-05,-22.3204148337806  
"Mfsd2a",648.999814291444,1.98442879326208,0.431660207109867,4.59720113315192,4.28204211653628e-06,8.81646957343854e-05,18.52723038143  
"Cap1",7318.93936919882,-0.510424544662089,0.170633030922277,-2.99135836656729,0.00277739342847506,0.0127684694759166,-2.22584734367496  
"Ppt1",3947.60790373443,-0.312933571539826,0.139122191786479,-2.249343311239,0.0244906622642167,0.0672940998911638,-0.844508420443266  
"Epha8",2.96076503252363,-0.437212373652703,1.12496289827783,-0.388646038302256,0.697538005252151,0.798110206349771,-0.0985951449828027  
"Ephb2",876.968877309861,-0.268096263232334,0.255555312756476,-1.0490733310945,0.294144369294884,0.438305457585911,-0.22113631262847  
"Eloa",2002.34110903792,-0.493866046505991,0.182202542043026,-2.71053323937361,0.00671751151655408,0.0249672206537879,-1.82246028117824  
"Pithd1",1014.96681605388,-0.0172295554106359,0.199496748590626,-0.0863650938291308,0.931176194308587,0.957144469219718,-0.00075467069520762  
"Lyp1a2",5172.97663920973,0.140718247701016,0.118551029512408,1.1869846114351,0.235233690503556,0.373202466609375,0.138696717594009  
"Gale",879.263944050371,-1.48940408419703,0.509532293895386,-2.92308083715461,0.00346586523312706,0.015107856095576,-6.24438679376709  
"Hmgcl",3455.80542482511,0.755251201144509,0.21011817904528,3.59441150963788,0.000325125621559479,0.0024632011275109,4.53626038302924  
"Fuca1",6626.84186924346,0.944833277694195,0.156344191372538,6.04328993229331,1.51002943870847e-09,2.13351840550274e-07,14.5129445159179  
"Pnrc2",3827.84692396234,-0.126056892075641,0.0829955754999361,-1.51883870093458,0.128803101773721,0.23863577331661,-0.180616439084955  
"Srsf10",5036.61984064816,-0.1200888266263,0.146046064214521,-0.822266777760654,0.410925080345722,0.554440330536357,-0.0708279200936104  
"Rnf220",2987.5763997956,-0.081913537337126,0.104171864201808,-0.78633072341336,0.431673757595652,0.573740622058625,-0.0455093480029735

"Kif2c",119.296798055546,-0.966283298962753,0.422744645795171,-2.28573  
752163129,0.0222696187528743,0.062620857577667,-2.6772394589264  
"Plk3",952.691477142162,0.127421789638613,0.228380947529407,0.55793528  
7584381,0.576888574137535,0.702204143630637,0.0450475672819635  
"Ptch2",652.84231356631,-1.14775399277017,0.409031377976646,-2.8060292  
0599333,0.00501561460502379,0.0199255202870322,-4.49432222206545  
"Eif2b3",703.276651073777,0.0656971091620312,0.151744408362974,0.43294  
5832210719,0.665054122435963,0.772962880260873,0.0169185988895245  
"Urod",2638.27058877611,0.674401301076488,0.1622008733779,4.1578154730  
7238,3.21305391544247e-05,0.000410538173285041,5.25900942869219  
"Mutyh",165.028419399514,0.125679715304223,0.321713264663552,0.3906575  
48533659,0.696050381509739,0.79739073670252,0.0284552022777459  
"Toe1",839.102387555058,-0.0599223424212274,0.0834181267977687,-0.7183  
37185471662,0.472549407287574,0.610425887325634,-0.0295775717131404  
"Ccdc163",848.995457339884,0.311197317586616,0.218420879301453,1.42475  
993404054,0.15422660763074,0.273855949114857,0.403048153156211  
"Mmachc",620.412838031624,0.144423110359251,0.287584121736038,0.502194  
312702047,0.615530843142772,0.734673137830422,0.0445299182760833  
"Prdx1",35044.7166436291,0.49249132499239,0.355882246245429,1.38386033  
635617,0.16640122377052,0.289476805101269,0.610531697836296  
"Akr1a1",55370.2886453468,1.25221164588046,0.284087644704713,4.4078356  
4234916,1.04408725313377e-05,0.000177022724013933,10.8181474845713  
"Nasp",1972.81453810765,0.33278129959951,0.168957708572492,1.969613002  
04145,0.0488827403693069,0.114405914262483,0.721470690574549  
"Ipp",502.184018375278,0.328344472354157,0.32383656037309,1.0139203306  
0095,0.310620769414055,0.45588879340252,0.257916613786066  
"Pik3r3",1251.3492733238,-0.296376966687273,0.1831176443162,-1.6185057  
8514161,0.105553641090286,0.205377197283544,-0.469137176333323  
"Tspan1",988.299055214363,0.423834044441457,0.539866964446733,0.785071  
271911982,0.432411782213824,0.574486571927306,0.234922121908277  
"Pomgnt1",2495.07672844484,0.0834498236503907,0.121737214999601,0.6854  
91479747291,0.493033835334099,0.629342315887709,0.0386439399899565  
"Lurap1",597.576686375082,-0.293673561828681,0.242014246297062,-1.2134  
5568007682,0.224955649311345,0.360973191529306,-0.299239141326846  
"Rad54l",155.205358622938,-0.703582127999297,0.360439163506491,-1.9520  
1354135488,0.0509365969330853,0.118078916538021,-1.5031343314408  
"Lrrc41",1946.12613136372,-0.0336030925588166,0.0858533618493376,-0.39  
1401010222361,0.695500845713264,0.797229599630642,-0.0076148828905423  
"Nsun4",999.776935770257,0.251230748260317,0.116078750488966,2.1643129  
9615167,0.0304403359827032,0.0795333582650046,0.636010422263662  
"Dmbx1",0.220838897876658,-0.0640482484514447,4.78471990595296,-0.0133  
859974482014,0.989319838260088,NA,NA  
"Mknk1",1498.00894406277,-0.387288506387523,0.159818492412394,-2.42330  
221328936,0.0153801258374768,0.0470034002475114,-1.1841482928083  
"Mob3c",1501.05420274759,0.299689309660479,0.183507568679719,1.6331168  
8894716,0.102444415195819,0.200972050255365,0.48087829977828  
"Atpaf1",1178.96737591578,0.700964393600958,0.258728606176546,2.709265  
1406418,0.0067432427678927,0.0250437614263565,2.58454721421332  
"Cyp4a31",7168.09875928125,2.64220907751274,0.939081106867573,2.813611  
15476614,0.00489884462940453,0.0195692834632513,10.3939065125423

"Cyp4b1",57804.9701420961,2.21954081107583,0.668433871016191,3.3205091  
8919109,0.000898534010655577,0.00542739037786941,11.5777837500341  
"Cyp4a14",1687.31550255692,3.42375124323122,1.22748637739176,2.7892376  
699986,0.00528322780344639,0.0207610521644609,13.2659286198241  
"Pdzk1ip1",17849.50087418,1.57393779800456,0.417599139125751,3.7690159  
0673682,0.000163892444026297,0.00145517981494751,10.281946669733  
"Tal1",220.543116693585,-0.823138243858616,0.191416082144424,-4.300256  
46036135,1.70600563357282e-05,0.000253534282343009,-6.81559413183208  
"Stil",71.2988646814584,-0.795820204331405,0.396771662736239,-2.005738  
51177583,0.0448841540100309,0.106960551807331,-1.77889307261477  
"Cmpk1",5456.90054752305,0.220984841466404,0.25080539746663,0.88110082  
039126,0.378263253260029,0.523177036858622,0.143161796447064  
"Ebna1bp2",2125.88659219192,0.00611252661193472,0.155231964074382,0.03  
9376726619305,0.968590034982883,0.980658846153693,0.000119381564150273  
"Cfap57",5.57094690355381,0.697724153765958,0.657100217283294,1.061823  
04527401,0.288316025747371,0.432394664944291,0.584983464968574  
"Aldh4a1",13184.3842907393,1.1594075342168,0.382630872379437,3.0300940  
6169157,0.00244477586273029,0.0116292363433802,5.16427127298924  
"Tas1r2",3.27356444034218,-0.251851228744096,1.08324015601162,-0.23249  
8054421641,0.816151198167115,0.882553161880229,-0.0314653485552273  
"Mrto4",1009.34726495496,0.182187781732533,0.131593162694041,1.3844775  
6709158,0.166212272390041,0.289202827687044,0.226027083114801  
"Akr7a5",9213.34539542981,1.68516359424898,0.432550209199493,3.8958797  
3467326,9.78429333009895e-05,0.000972345317789344,11.6879569009944  
"Pqlc2",877.5810882736,0.838916624494791,0.191761217279007,4.374798180  
77184,1.21544876706275e-05,0.000197985129993229,7.15370936202269  
"Capzb",9282.77687489945,-0.375904653311846,0.0993955407672562,-3.7819  
0661683769,0.000155631749002541,0.00140032664607824,-2.47008817852507  
"Htr6",1.07433677093861,-3.00945142581752,1.6811242398991,-1.790142188  
41919,0.0734310560649092,NA,NA  
"Pla2g2f",0.0764107020153886,-0.544048378937456,4.78471990596623,-0.11  
3705376621746,0.90947135024012,NA,NA  
"Pla2g2c",13.8446593054809,1.43423693583105,0.758325718405107,1.891320  
44584681,0.0585815810054089,0.131169461006369,2.91331557098188  
"Pla2g2e",9.43573580438282,-4.56328502048739,1.33185773459211,-3.42625  
559920251,0.00061196421451342,0.00402430969800427,-25.1683508102749  
"Vwa5b1",2.46990890468335,3.31557835782826,1.26699559368623,2.61688231  
147027,0.00887369304378031,0.0308302328880307,11.5357574436693  
"Cda",5177.40820011798,2.26389473113492,0.696572379011239,3.2500495272  
9886,0.00115384911441743,0.00655528847112793,11.3816926253268  
"Pink1",10910.7910055684,1.02350410148596,0.191355152139233,5.34871462  
85,8.8581085046774e-08,4.17472072147031e-06,12.6775957805959  
"Ddost",5443.38982322206,-0.0584569792713283,0.130949086644069,-0.4464  
09980928081,0.655301124428106,0.7652858891684,-0.0156375812181708  
"Kif17",39.5234745688771,-0.265736709072763,0.356148635776215,-0.74613  
9904463198,0.455582906020345,0.59569175842172,-0.137660100155532  
"Hp1bp3",7204.59239013627,-0.388152532344008,0.107558309764044,-3.6087  
6377841487,0.000307659590267467,0.00235522053044173,-2.34875790566721  
"Eif4g3",10504.2950557884,0.704966315310109,0.213203705639808,3.306538  
75454256,0.000944562834649367,0.00562182116910664,3.65250070563596

"Hspg2",7317.87415731535,-1.07978508223101,0.187293091648604,-5.765215  
75209449,8.15534443285866e-09,6.81317024540035e-07,-15.3321254914793  
"Alpl",7066.94642010597,1.54137992450937,0.426563969670286,3.613478948  
30589,0.000302115895095535,0.00231915579628848,9.35086152611754  
"Ptpn12",1851.12650459158,-0.263583598209407,0.173914209036269,-1.5155  
9553224567,0.129621657476968,0.239587097326642,-0.376618331169424  
"Zcchc17",1768.81181982047,0.443330002158627,0.245843611271452,1.80330  
088655067,0.0713409734872361,0.152306476371964,0.834285217844069  
"Fabp3",1947.60758127089,1.14884061491352,0.538981718420311,2.13150200  
767593,0.0330478072213179,0.0847292761605861,2.83567650209869  
"Tinagl1",4114.68999185567,-0.215608667555037,0.164118966409489,-1.313  
73400815282,0.188935732196205,0.318123394331744,-0.246940043532449  
"Gnat3",4.31150926641589,-3.33182210559238,1.3628764504506,-2.44469856  
713043,0.0144973251689825,0.0451475556851654,-10.3213822838927  
"Hcrtr1",14.2539663955969,-0.0352300061788018,0.557425864540779,-0.063  
201240595151,0.949606256904458,0.968734515624084,-0.00111906995419825  
"Pef1",2717.57023177566,0.165090543864231,0.187331934517008,0.88127282  
8841907,0.378170168810142,0.523177036858622,0.106951493501509  
"Sema3c",3536.10977574199,0.110254288317325,0.250933721008931,0.439376  
134359401,0.660389016334548,0.769369460877227,0.0289069082971988  
"Adgrb2",100.540369421638,-1.47329561197825,0.548411333485679,-2.68647  
914807676,0.00722094551770491,0.0264005242273036,-5.35450345349886  
"Spocd1",0.366353220158493,-1.38557779097994,4.76874047520826,-0.29055  
4245546238,0.771392257703944,NA,NA  
"Hpca",42.6980088006184,-1.22554812810393,0.539061136614281,-2.2734863  
3552275,0.0229968886496815,0.0641111431071619,-3.36674871919948  
"Tmem54",232.94545995009,-0.819374071504271,0.217396271023888,-3.76903  
461887916,0.000163880159249381,0.00145517981494751,-5.35266420086602  
"Ptp4a2",13432.597917301,-0.283969532838508,0.111202432560605,-2.55362  
698728506,0.0106607396405127,0.0356571529177321,-0.946699193077138  
"Azin2",498.406590690928,0.047496008787179,0.171593383172867,0.2767939  
41053837,0.781938333816651,0.859027182131512,0.00721724241114561  
"Khdrbs1",4090.33381906306,-0.25487070971593,0.122274686671157,-2.0844  
110637664,0.0371227923153543,0.0925719663083231,-0.606533394317988  
"Ak2",8408.35126338612,0.23926954894386,0.349280464845007,0.6850355889  
50087,0.49332146359569,0.629542633496221,0.110724783663932  
"Rnf19b",1711.174102286,-0.674951326965892,0.147139022191612,-4.587167  
40748037,4.49300395761873e-06,9.15449959339731e-05,-6.27615636974159  
"A3galt2",47.8645627159428,-1.44178383250962,0.383568006474835,-3.7588  
7406710552,0.000170679714231559,0.00150009955003354,-9.37480115940811  
"Ccdc28b",868.450892998588,0.216986260733586,0.193193590835878,1.12315  
455080453,0.261371861344808,0.402927621165486,0.197240149345223  
"Phc2",4411.68139772867,-0.341312669321472,0.163314958333701,-2.089904  
51826262,0.0366263776401619,0.0916566477013238,-0.815636856535253  
"Tmem234",5732.49810358598,0.167190768123522,0.15081516045885,1.108580  
64676555,0.267611130810738,0.409755715173708,0.149166619151777  
"Eif3i",3819.00153113349,-0.0598605658275649,0.246735058184334,-0.2426  
10702621933,0.808306989400371,0.877917205844944,-0.00779402455659608  
"Zfp362",1565.09253105854,-0.44381999422356,0.168124823817857,-2.63982  
429331426,0.00829490204103945,0.0292666309865536,-1.5672647793399

"Hdac1",4166.412698309,-0.110479032490742,0.105557892838362,-1.0466202  
9072441,0.295274739760797,0.439687404601803,-0.0907796541560377  
"Stpg1",23.636641519842,0.829652253069601,0.473077430336368,1.75373458  
945125,0.0794759957246827,0.165504962580355,1.49234039114832  
"Nipal3",1760.88080270026,0.365083735068191,0.146499484317666,2.492047  
91927153,0.012700890075958,0.0405903875923665,1.16981006562853  
"Csmd2",1.32781154242331,0.886957951565432,2.25332903172993,0.39362114  
4127583,0.69386076818754,0.79586430131894,0.202516078700724  
"Zbtb8a",606.377906172759,-0.35461957848296,0.232079012399075,-1.52801  
226968843,0.126509491621964,0.235550235642194,-0.512720005822699  
"Srrm1",6444.07539373971,-0.235119176856613,0.17377796364401,-1.352986  
14350357,0.176060057138165,0.302385494236688,-0.281214903875773  
"Yars",2048.14539470453,-0.114160266215803,0.139619152441415,-0.817654  
771709814,0.413554342968434,0.557052354056913,-0.0667947208927243  
"Sfpq",8117.10116778779,0.12140130390732,0.122233314694614,0.993193256  
76987,0.320615783886186,0.465887607245795,0.0927276343564564  
"Syf2",3606.57259704333,0.0701129152909179,0.104894069526029,0.6684163  
90056446,0.503867836116335,0.638778613042673,0.0314244223502005  
"Tmem50a",4209.23068339393,-0.333889091606183,0.140420262045016,-2.377  
78427944497,0.0174170118452609,0.0517126384892487,-0.9889972085434  
"Rhd",1.4163128890566,2.07418906827422,1.49645520368563,1.386068265301  
68,0.165726059514875,0.288562842330865,2.57789010387035  
"Maco1",2757.58402878916,0.108994185757971,0.151180945820145,0.7209518  
71062096,0.47093912701905,0.608910550306196,0.0540702609321956  
"AU040320",2468.97316123083,0.198537195679536,0.100779369883651,1.9700  
1822802371,0.0488362815283065,0.114365444848718,0.430499379270844  
"Stmn1",3143.17787663976,-0.251035902438866,0.271399856292598,-0.92496  
696891476,0.35498308941545,0.500105511374454,-0.173951859297218  
"Ncdn",1508.93566500517,-0.109691427721002,0.0889719642816116,-1.23287  
631791302,0.217621912228661,0.353037154993813,-0.114208737097103  
"Trim63",426.260690743186,1.92349409221952,0.808373763513661,2.3794613  
0742653,0.017337963119539,0.051532866601337,5.70418999226835  
"Slc30a2",1956.94382522377,1.15407913275537,0.585142571274397,1.972304  
16895129,0.0485748940118776,0.113945293965783,2.50670237329928  
"Psm2",2877.21574993515,-0.29153517933496,0.247439211378888,-1.178209  
29718593,0.238713177014214,0.376785357842074,-0.284561540142351  
"Extl1",191.023652599285,-0.594196915367362,0.189363758840436,-3.13785  
974151501,0.0017018629233009,0.00887243937928369,-2.80746485731344  
"Zfp593",444.347781702273,0.164398924241987,0.178089266380844,0.923126  
51729622,0.35594127712748,0.500986371651578,0.113628653425455  
"Cnksr1",682.425887442272,0.399872186851745,0.225119219345829,1.776268  
53901559,0.0756886661270286,0.15928522527197,0.734588725405184  
"Ago3",1178.13047259995,0.0969708304246851,0.207679675094421,0.4669249  
91001636,0.640553544613201,0.754152105118544,0.0273614059157039  
"Sh3bgrl3",6514.61281735376,-0.269931900422485,0.252428887364812,-1.06  
933839165712,0.284917217187193,0.429114467844577,-0.228370909732371  
"Tek2",159.989936718015,-0.235049293113768,0.27861812723762,-0.843625  
271062519,0.398878838146743,0.543242089586847,-0.143427130657401  
"Trappc3",3332.0076971053,0.0699082231985135,0.12550079074348,0.557034  
125318015,0.577504113787288,0.702663039664557,0.0246690613862876

"Gpn2",766.243323192082,0.336323330064638,0.159272853911453,2.11161740  
249606,0.0347192786882968,0.0878821882207466,0.817856992757103  
"Map7d1",4181.70491793766,-0.889844674207708,0.153144531774562,-5.8104  
8937168461,6.22904874921266e-09,5.60381183856537e-07,-12.8090013931967  
"Gpatch3",538.134230447856,0.275483129506735,0.196393366641572,1.40271  
096838778,0.160703045218999,0.282312638587265,0.348414581330223  
"Nudc",5428.92524515645,0.0594281209588038,0.153869444219573,0.3862243  
16726584,0.69933054615737,0.799645026329838,0.0132873770834169  
"Slc9a1",2187.15382779919,-0.214628526601529,0.14202608369637,-1.51119  
090955413,0.130739817805521,0.241078585925104,-0.305337477871954  
"Tmem222",2032.32229297629,-0.178003853034301,0.144280563394753,-1.233  
73411391028,0.217301997626698,0.352668083046892,-0.185520588888949  
"Csfr3r",499.042114811743,-1.06180769021048,0.475732368081329,-2.231943  
33926204,0.0256187080070445,0.0698034612522854,-2.82660818415942  
"Sytl1",503.718492931208,-1.12199800819096,0.44377436185157,-2.5283074  
1169819,0.0114613948069122,0.0376980897343412,-3.67807312097863  
"Mrps15",2072.28609141724,-0.0852185822459899,0.277314303215068,-0.307  
299628104287,0.758615318733614,0.843396138936481,-0.0145143024343137  
"Map3k6",591.046811752362,-0.094359302772956,0.3040696619671,-0.310321  
332823942,0.756316610113802,0.841774546120265,-0.0162527351006087  
"Meaf6",1339.58434184051,-0.252809058292941,0.106556357930741,-2.37253  
846886603,0.0176663233766694,0.0522450871710519,-0.746244159222869  
"Hgf",99.6154093637875,-1.474296542012,0.331895032407864,-4.4420566686  
8867,8.91030845378931e-06,0.000156234886899266,-12.9209560355349  
"Cd164l2",204.783889905313,1.70921506861639,0.319059201683036,5.357046  
77878051,8.45932246624193e-08,4.02362491182574e-06,21.2341382957762  
"Wasf2",3825.26114475827,-0.633168189015773,0.202832995774254,-3.12162  
32181497,0.00179856964411273,0.00920433357504201,-2.9683436712937  
"Gnl2",2170.14522036462,0.356725894357729,0.23145817065001,1.541211067  
88292,0.123265424667376,0.231121189553275,0.52253675457797  
"Rspo1",115.663290263921,-1.59188608213973,0.414634532022946,-3.839251  
09752228,0.000123410168152041,0.00117092528400413,-10.7451689735815  
"Cdca8",238.000560249157,-0.558953258015168,0.31698841713941,-1.763323  
91908611,0.0778458733650938,0.162875720449898,-1.01437038565124  
"Fgr",386.245504383578,-1.18814160927548,0.482313900969194,-2.46341979  
131838,0.0137618682940786,0.0433347719634923,-3.72933878646518  
"Epha10",1.70206954108835,-2.27632364365411,1.99300806795302,-1.142154  
75604776,0.253389698546984,0.393798209968843,-2.12134392325146  
"Fam76a",2014.75558369735,0.237936493701092,0.0904560193577444,2.63041  
083822269,0.00852817368721795,0.029874801696546,0.835333143655062  
"Stx12",2677.36885191721,-0.505493945787174,0.228130091785131,-2.21581  
441462481,0.0267042148409125,0.0720662672620224,-1.32953460932905  
"Ppp1r8",1202.60438095991,-0.575246789618999,0.16409777392344,-3.50551  
245068919,0.000455729185489072,0.00321019062813076,-3.30273627486632  
"Sema3a",90.6026539660211,-1.33032816185451,0.231762625660985,-5.74004  
61271977,9.46507665478427e-09,7.62668681937531e-07,-18.7395906668276  
"Rpa2",601.868270905694,-0.286038001098288,0.194439579330358,-1.471089  
38459645,0.141266945456492,0.256011051446294,-0.389736692210324  
"Smpdl3b",191.322708598524,-1.08041066256013,0.389499906257262,-2.7738  
4062281783,0.00553988111951163,0.0214361186878821,-4.15167027373913

"Eya3",1283.13936520889,-0.289566336251624,0.108314856233362,-2.673375  
99218856,0.00750920336102453,0.0271893123738637,-1.04386675197041  
"Yrdc",1071.55379980475,0.0305837526532193,0.152350122885052,0.2007464  
91529217,0.840896804638289,0.898239455056056,0.00328220528775902  
"Mtf1",1533.84295355796,0.290721304985093,0.11838004221354,2.455830387  
86788,0.0140559481197431,0.0440962048107642,0.90745212017302  
"Sesn2",1845.47545758245,0.409752461479285,0.216315382396659,1.8942363  
5498986,0.0581936445853681,0.130540690534458,0.834284815513925  
"Inpp5b",2298.23149828287,0.580799640322763,0.239699791795411,2.423029  
3901068,0.0153916813929376,0.047031343645118,1.77547024111444  
"Rcc1",996.01512341665,0.2138513908368,0.129350881194846,1.65326582131  
797,0.0982767757609941,0.194695293446214,0.349929209537867  
"Trnau1ap",1820.64514482165,0.302490774261949,0.140212108258763,2.1573  
7982987673,0.0309760815003453,0.0805850942630228,0.761805343853071  
"Taf12",1354.19200955436,0.00738523009615747,0.187953912849838,0.03929  
27712127907,0.968656969903876,0.980658846153693,0.000144238279268594  
"Gmeb1",884.475413267529,-0.125426439941986,0.181544688932505,-0.69088  
4655891077,0.489638029545836,0.626190000710156,-0.0587122969530096  
"Sf3a3",1721.48998989705,-0.179313030841581,0.102485341165015,-1.74964  
564495974,0.0801794782946931,0.16657852613638,-0.321380674523679  
"Epb41",6100.25931489615,0.964421345058256,0.1758556567861,5.484164471  
4979,4.1542814147999e-08,2.32092203512231e-06,12.5119647050095  
"Utp11",2736.99154722597,0.0389636612252866,0.130469015184651,0.298643  
023940526,0.76521243428727,0.847955652132721,0.00642615747829785  
"Ptpru",1683.49885650806,-0.708254787478955,0.273177776773109,-2.59265  
15540362,0.00952392089605286,0.0325784929177612,-2.42513729637427  
"Mecr",1867.62193846925,-0.213999473725975,0.371216611663502,-0.576481  
404662892,0.564289835284861,0.692175800132294,-0.0787336825434267  
"Srsf4",3885.93834418837,0.0636636137163179,0.141580386398232,0.449664  
076613319,0.652952677756218,0.763594501103844,0.0171712472935031  
"Casp9",1173.47154062494,-0.111353115338826,0.190027128065252,-0.58598  
5361524745,0.557885352014555,0.686782595104151,-0.04183954031663  
"Plekhn2",2675.17818184859,0.118854435383053,0.145611746022496,0.81624  
2086436429,0.414361690218528,0.557726372765489,0.0693975369233803  
"Arhgef19",1170.4625977686,0.458238224787819,0.301170070584515,1.52152  
643819641,0.128127781895991,0.237645709614936,0.65847656579841  
"Fbxo42",1312.67979874043,-0.0882197472044014,0.131380212531471,-0.671  
484278374637,0.501912071574977,0.637027425567715,-0.0397820395353096  
"Necap2",3431.37629185566,-0.212171523250959,0.0854203761323243,-2.483  
85142816844,0.0129970020913458,0.0413942415513004,-0.67568429742796  
"Cdk14",472.301410458255,-1.18306653395006,0.234950623326187,-5.035383  
67849991,4.76892653600349e-07,1.51440601952762e-05,-13.1295566534387  
"Padi2",402.242532108071,-1.2692910066062,0.309280932042879,-4.1040066  
6546823,4.06055755735387e-05,0.000493903626034222,-9.6633284016451  
"Kcnab2",376.577488802543,-0.925153790249437,0.343434471275521,-2.6938  
291512014,0.00706363620226801,0.0259344087403786,-3.37883248938988  
"Psmc2",4332.05340537028,0.160062487538273,0.149000831021135,1.0742388  
9142986,0.282715625606751,0.426622495788285,0.136350149022964  
"Xrcc2",176.859862514412,-0.050909461092819,0.244006739526379,-0.20863  
9569512035,0.834729618289984,0.894359715211458,-0.00568389973794315



"Rpl22",10404.1571708748,-0.0816125931320202,0.174511245269958,-0.4676  
63805881223,0.64002502813157,0.753711904240464,-0.0230755586726823  
"Acot7",1021.25545186934,-0.560776042579697,0.247410692620016,-2.26657  
965604163,0.0234159160297441,0.0650097580447032,-1.53272311555734  
"Galntl5",0.45512698397963,3.27980682463686,2.76255742727449,1.1872357  
0857047,0.235134659473074,NA,NA  
"Hes2",24.0807557818413,0.451144722170297,0.447703298213102,1.00768684  
07513,0.313604824320824,0.458749108305756,0.351555347351761  
"Espn",1479.50154541382,1.21079894637993,0.354351023739069,3.416947786  
98175,0.000633274238581778,0.00413710747863871,6.64457210322571  
"Prkag2",2129.93327911785,-0.0976146343065505,0.21329474951755,-0.4576  
51369887653,0.64720293101108,0.759641388686132,-0.0268351233514539  
"Rheb",4226.86808499115,-0.0171321078982385,0.189730087335369,-0.09029  
72645975522,0.928050993808096,0.955739739483284,-0.000775564391750838  
"Hes3",1.09005442187109,-3.02165967929863,1.84485486649391,-1.63788476  
490902,0.101445734653524,NA,NA  
"Nol9",1302.86541403198,0.215633216342066,0.0902237068199603,2.3899840  
0689031,0.0168491064919394,0.0503948271789898,0.644283316120121  
"Smarcd3",1286.2349482607,-0.0868006739123609,0.167620030930881,-0.517  
841891749521,0.604568587376745,0.725586502318834,-0.0278434846509427  
"Tas1r1",8.17104777456371,0.359684257539435,0.609694896196481,0.589941  
394922753,0.555229940577087,0.68466186322869,0.136259256673429  
"Zbtb48",941.027748314489,0.286291819732172,0.211565653849611,1.353205  
56301487,0.175989968554066,0.302385494236688,0.342420076672442  
"Abcf2",1955.99556789522,-0.285430752019317,0.161060315656985,-1.77219  
789278948,0.0763617133007411,0.16030369142311,-0.52253385089628  
"Nub1",2937.11255679026,-0.349458162161268,0.133681552742263,-2.614109  
08979356,0.00894604674598668,0.0310428936560328,-1.21345340781395  
"Vamp3",3567.44729370296,-0.168997294908922,0.15485326649701,-1.091338  
26319502,0.275124067000355,0.418502813104457,-0.147208755428731  
"Per3",2109.94573407519,1.94990234737164,0.18920930300556,10.305531051  
5802,6.65232383778574e-25,2.59414020378293e-21,92.4273832120578  
"Tmub1",559.769279028026,0.304738659786986,0.159473960963238,1.9108991  
7091377,0.0560175396469802,0.12684124817522,0.629230171353144  
"Fastk",5558.54486521957,0.910953057263056,0.26329949189663,3.45976002  
726466,0.000540656983360648,0.00367820302217932,5.10619337065939  
"Ube4b",3537.67511878544,-0.224831628212987,0.192288879606236,-1.16923  
884872277,0.242307413133819,0.381039595232131,-0.216929242718445  
"Pgd",10429.4378068868,-1.7053960298235,0.514226486424718,-3.316429773  
34884,0.000911754988807649,0.00548515852260769,-8.87779594630232  
"Slc4a2",3924.64315569788,0.0033615938679062,0.122828944553854,0.02736  
80921065989,0.978166147521479,0.986106382522817,4.7032184770997e-05  
"Uts2",0.167411724685723,-1.38296167455407,4.76914167930786,-0.2899812  
51879012,0.771830580500136,NA,NA  
"Park7",13869.3351581289,0.885457087810665,0.262815793967124,3.3691167  
2789888,0.000754094860258684,0.00472776256762824,4.74100573510126  
"Tnfrsf9",105.156979177285,-1.66250726038815,0.460745228741725,-3.6083  
0054589689,0.000308209327814907,0.00235757766721658,-10.0583694224982  
"Errfi1",12343.0831619764,1.22807959752454,0.310577440521607,3.9541815  
8982189,7.67970684978281e-05,0.00080504797933906,8.74958656106282

"Cdk5",2347.80731576854,0.226700131161095,0.160042370155021,1.41650071  
128981,0.156628956056401,0.277186237164506,0.290871153949312  
"Abcb1b",295.877913114053,-0.354521985273499,0.367970670768677,-0.9634  
51746121275,0.335320868741776,0.479895775117426,-0.260285196629901  
"Cort",3.065513704554,-3.63800952280378,1.59179486943014,-2.2854763466  
515,0.0222849118221007,0.0626548249037232,-10.0777032466858  
"Car6",1.52481356730311,-2.42770820754154,1.64702774852333,-1.47399350  
722424,0.140483339329373,0.254993869879363,-3.31750155979274  
"Abcb8",2338.17477727636,0.904055630804867,0.249445242394124,3.6242648  
7724491,0.000289784505539387,0.00224929072014609,5.51215406337499  
"Dffa",1074.4644915639,0.049178532424708,0.11194219647367,0.4393207742  
37937,0.660429123484461,0.769369460877227,0.0128938234393235  
"Pex14",2034.08020829065,-0.250403971838146,0.310038482558657,-0.80765  
4487828849,0.419289510368451,0.562263196228615,-0.14417890551912  
"Slc2a5",1739.45249975666,0.504677825550142,0.686476397398332,0.735171  
416617985,0.462235104516136,0.601525733688555,0.256520654038593  
"Casz1",1958.1212723706,0.360588822164954,0.164759571766255,2.18857586  
420849,0.0286276816681558,0.0759742122180077,0.929367678776658  
"Nos3",1224.83994465619,-1.18700534954175,0.320088409897178,-3.7083671  
6619341,0.000208600039978091,0.00174936928150229,-7.53570342189651  
"Masp2",53.2140342095048,1.63366499154573,0.359569264744974,4.54339442  
139031,5.53555363353109e-06,0.000107502215883057,14.9284292187598  
"H6pd",9111.0388296497,-0.209584885618501,0.135186949621164,-1.5503337  
1346733,0.12106143947795,0.228129501009091,-0.30973330972685  
"Slc25a33",475.828861666767,0.326556493562162,0.324047111876538,1.0077  
438791881,0.313577434021968,0.458743458025235,0.254473765166278  
"Klhl7",1526.79388175358,0.00432319307676962,0.163472178923827,0.02644  
6047916105,0.978901566053235,0.986669833155619,5.80164342572718e-05  
"Ctnnbip1",1296.05994908111,0.345681231596696,0.22476541132314,1.53796  
453627697,0.124057286130561,0.232337812407423,0.504543493405368  
"Angptl7",192.089253076173,1.69388629262061,0.412034088293482,4.111034  
35552181,3.93890580557195e-05,0.000482114158173521,12.9367679712505  
"Lzic",546.408508289074,-0.729074073177886,0.269306709450109,-2.707225  
80460979,0.00678480918392967,0.0251809053172351,-2.68420963059655  
"Mtor",5133.14034880881,1.00565390338201,0.284183119480354,3.538753129  
39385,0.000402021633156003,0.00290534388557293,5.87422911887929  
"Nmnat1",776.467262988417,0.409162283125627,0.244683724285463,1.672208  
82517006,0.0944831508533913,0.189082672209732,0.681488808707632  
"Fam126a",1513.46472612632,-0.408443274331467,0.174245254745178,-2.344  
07114804239,0.0190745323571782,0.0554352708153614,-1.18143819443446  
"Rbp7",347.67723649693,-3.89205777920436,1.48629948881013,-2.618622833  
76024,0.00882855002549179,0.0307281450191073,-13.5543880575059  
"Tomm7",3755.71034071376,0.580278978554709,0.247005387193034,2.3492563  
6703309,0.01881095005645,0.0548408947668454,1.68473504668043  
"Rint1",1172.52668095626,0.371712420484817,0.175578587604224,2.1170714  
8096386,0.034253781670527,0.0870656022698391,0.90738473463405  
"Fbxo44",777.305043483487,0.840041043530862,0.167131749142006,5.026220  
61842425,5.00240373018533e-07,1.57571676787001e-05,9.28935464082032  
"Mad2l2",678.839276810404,-0.0625207798362806,0.154070379871327,-0.405  
793637222776,0.684894234183577,0.788408771880469,-0.014863601267799

"Kmt2e",8662.02678651926,0.802263826590179,0.380307063882391,2.1095159  
7480261,0.0349000686014113,0.0882252738999505,1.94778570200232  
"Draxin",7.74882675643157,-0.437281939373125,0.598227661186338,-0.7309  
62420737878,0.464802106983836,0.60365759554858,-0.220717244058693  
"Agtrap",4042.11122284423,0.824455460101259,0.213676981662273,3.858419  
62801755,0.000114122584034516,0.00110211101709014,5.61497685715219  
"Mthfr",2324.90989636926,0.0506048155039746,0.171010233514909,0.295916  
884410095,0.767293556339588,0.849739749379717,0.00823973685631798  
"Orc5",832.505832644668,0.0791799501220491,0.128481431013833,0.6162754  
37604086,0.53771274710977,0.66903400732284,0.0318240362018188  
"Dnajc2",3475.33688212502,0.807152707397425,0.230610343006298,3.500071  
57907649,0.000465133242076447,0.00326262532896583,4.62112931921249  
"Slc26a5",0.320386768280302,-1.9165164075799,4.7523482065286,-0.403277  
774332079,0.686743890229271,NA,NA  
"Clcn6",1445.37985430181,0.231522086794569,0.161222940284266,1.4360368  
7159131,0.150991849657561,0.269378633417799,0.303673011733594  
"Pmpcb",6031.50486446568,1.22315288013064,0.286171435844447,4.27419625  
764293,1.91828014149995e-05,0.000279711746163075,10.0075322549791  
"Nppb",1.53653831768835,-2.31431317024156,2.02012735683629,-1.14562735  
978488,0.251949371656269,0.392041426196663,-2.16709453861766  
"Mfn2",5103.67667832434,-0.296227065260721,0.365119621460251,-0.811315  
108391044,0.417184735898467,0.56049812145886,-0.171494553606598  
"Miip",1627.02919474708,0.222101839702694,0.20721826998293,1.071825566  
92994,0.283798387255066,0.427825959076795,0.188573080296491  
"Trp73",10.7838501884132,-1.10204791932978,0.79658970663782,-1.3834573  
9362013,0.16652466278002,0.289587263650086,-1.36576644195649  
"Dffb",401.673426779766,-0.21048590913579,0.212428084549492,-0.9908572  
5685556,0.321755286219025,0.466993045310299,-0.160272582971921  
"Lrrc47",2382.00248948049,-0.199265031363327,0.137551705170628,-1.4486  
554791607,0.14743381942609,0.26449994437155,-0.265005402345467  
"Wrap73",437.812410119946,-0.0906115229603716,0.177292772444112,-0.511  
084133386967,0.609292145637621,0.729135527146067,-0.0286237864829779  
"Tprgl",5057.61653313716,-0.0234756727258971,0.105074879501865,-0.2234  
18507232078,0.823209801645971,0.886645567723203,-0.00282435729260346  
"Arhgef16",3276.77618220695,0.835219551642892,0.345952799508587,2.4142  
5868739692,0.0157672634247808,0.047901231264627,2.53790988115898  
"Acap3",1064.79162789709,-0.198171489142411,0.149870526646649,-1.32228  
459842302,0.186073399417662,0.314689837960411,-0.229119488011484  
"Ints11",1321.04913753381,0.0223077723425831,0.112064258535344,0.19906  
2329364785,0.842213988284126,0.898991228193709,0.0023753762558744  
"Atad3a",3400.174487709,0.665043198968988,0.189366443042649,3.51193795  
628937,0.000444851837852793,0.00315064334705912,3.83074765802246  
"Ssu72",2406.86568810771,-0.344172872930252,0.290806236423192,-1.18351  
269616309,0.236606017804355,0.374733501352393,-0.337819499762296  
"Pex10",713.868917814295,0.531579837698735,0.201932381995266,2.6324645  
5296703,0.0084767868004668,0.0297427369147925,1.86859366506054  
"Rer1",7616.64076173647,0.535674899845399,0.212703952382376,2.51840595  
271319,0.0117887361526179,0.0385148755870886,1.74453819595452  
"Morn1",194.249044880721,0.454723441012416,0.186366150691261,2.4399465  
2100597,0.0146894363325918,0.0455204433586897,1.40491070103294

"Ski",5160.24731358152,-0.396346454565289,0.127202293102838,-3.1158750  
7502604,0.00183399949422324,0.00933907603509136,-1.85234416308259  
"Prkcz",2535.30859674186,1.7355131627917,0.373274158872717,4.649432920  
92043,3.32848910975859e-06,7.17114703448321e-05,16.5617588738229  
"Gabrd",19.3695322830572,0.186759896207555,0.514018355836936,0.3633331  
26311159,0.71635605048028,0.812017340402564,0.0388896825110312  
"Plch2",770.3258442214,-3.07429733869338,0.649699258403475,-4.73187755  
55446,2.2245259151034e-06,5.20069619816381e-05,-30.3252777199958  
"Pank4",1593.48165718923,0.213623676011172,0.166561734929572,1.2825495  
3697198,0.199649939319576,0.331130870776887,0.23610577384771  
"Prxl2b",658.543827068327,-0.328218457608092,0.33228377850371,-0.98776  
5515024766,0.323267500156955,0.468142433011015,-0.249112126329313  
"Mib2",3327.91640303088,0.0682916172799131,0.130954249640938,0.5214921  
81179007,0.602023950934823,0.723601466855331,0.0220933283023929  
"Mmp23",1278.56231841957,-1.05622267906835,0.221758097426605,-4.762949  
76970537,1.90783344016016e-06,4.58114980495602e-05,-10.5526948554967  
"Cdk11b",6681.51247885749,0.180814507784996,0.169826784491191,1.064699  
58980101,0.287011895769982,0.431037352208512,0.152166352745864  
"Nadk",7067.35806738154,-0.170694866064309,0.255483234700606,-0.668125  
508369822,0.504053480369317,0.638889342796654,-0.0764753987326684  
"Gnb1",11216.3203141144,-0.599518008299872,0.135955282026727,-4.409670  
58699502,1.03527979391307e-05,0.000176068399660679,-5.18261615862501  
"Mrpl20",3203.46541749179,0.945868443505424,0.275951379974792,3.427663  
39342759,0.000608799815289321,0.00400890874654211,5.22047136114479  
"Ccnl2",14839.1559721182,0.370175730958043,0.206602551534657,1.7917287  
4782211,0.0731764272119166,0.155413875443659,0.689142667812509  
"Mxra8",3719.06164209231,-1.3199692755007,0.274977594865355,-4.8002793  
6875014,1.58444446096696e-06,3.9455297701065e-05,-13.3849401875703  
"Dvl1",6486.35578797868,0.554199842658735,0.221076922452723,2.50681905  
877015,0.0121823055741639,0.0394045444732992,1.79221253256534  
"Tas1r3",18.4843662582692,-0.997386297216597,0.41177418792995,-2.42216  
808739423,0.0154282124398198,0.0470986826603423,-3.04752405170756  
"Cptp",733.3042258895,0.37850752696342,0.244670892621934,1.54700676859  
135,0.121861613508136,0.229327066902966,0.557392475933617  
"Ttll10",618.513056996786,0.739723064128689,0.26598418529796,2.7810791  
2055012,0.00541785311000163,0.0211147911130945,2.85368993968816  
"Tnfrsf4",161.732057029867,-0.945308001662758,0.386976604159108,-2.442  
80401322166,0.0145736492037564,0.0452984237485801,-2.92523958149676  
"Sdf4",7000.86078964466,-0.408493454471891,0.249586634953816,-1.636680  
00310785,0.101697349390842,0.199854774949045,-0.657741577764794  
"Bst1",526.460618653741,0.110803915369975,0.440955509976972,0.25128139  
4297038,0.801596558973381,0.873450861007208,0.0149921471783808  
"Cd38",929.096145205512,-0.851154093671236,0.132920061454327,-6.403503  
61230992,1.51851260917558e-10,3.36454077883017e-08,-14.6461398100908  
"Prom1",4874.87374920907,0.211196005168816,0.498346605434655,0.4237934  
05765476,0.671716487669719,0.778062619650934,0.0529992721405965  
"Kcnp4",25.4620535419096,-1.33444490871271,0.64497034024092,-2.069001  
97645406,0.0385459012310974,0.095328257509378,-3.13651801388396  
"5730480H06Rik",527.52814248489,0.229763186506089,0.143460144389706,1.  
60158201069381,0.109248071450225,0.210756792038834,0.35775287401739

"Adgra3",2084.54424655443,0.686894246963043,0.295850166743164,2.321763  
93383396,0.0202456502540587,0.0580172969802523,1.95559759882424  
"Sorcs2",528.736131900772,-2.67071658176389,0.637571728250347,-4.18888  
803161487,2.80324660486312e-05,0.000369808540606367,-21.1054049400848  
"Afap1",2714.21779309353,-0.645714680153178,0.225541078718934,-2.86295  
819733068,0.00419705932019557,0.0173967395036508,-2.61609525345254  
"Ablim2",394.486505156322,-0.479268311170507,0.269915278935061,-1.7756  
2497781318,0.0757947502477731,0.159435920964036,-0.87999086621398  
"Htra3",1294.64576203214,-2.8409815830795,0.6149051323143,-4.620194943  
5468,3.83379651451674e-06,8.11716389097534e-05,-26.7590482722336  
"Trmt44",343.640380832275,-0.0203830596145824,0.151457179519807,-0.134  
579685685464,0.892944203944884,0.93382853574598,-0.00139547395874237  
"Acox3",7068.92778833903,1.18885109011822,0.270738938691395,4.39113448  
499311,1.12760766328829e-05,0.000187795454709123,10.2005292338409  
"Rgs12",878.702553288259,-0.49941835433592,0.266452639003615,-1.874323  
16753727,0.0608858962007415,0.135095543015473,-0.999722189811209  
"Hgfac",413.21380336128,1.10524027548287,0.237049437548722,4.662488495  
69915,3.12408556004299e-06,6.85190329018203e-05,10.5974847507724  
"Lrpap1",13604.5643006562,1.15283377973494,0.386464229250572,2.9830284  
2146737,0.0028541148924677,0.0130113472465128,5.00552753568346  
"Htt",2759.90408285511,0.0888716887629262,0.142338536542167,0.62436843  
1219598,0.532385652336318,0.664724895777591,0.0362935992872294  
"Add1",8681.48373028514,-0.145485008102602,0.0776561433833372,-1.87345  
136861148,0.0610060822301894,0.135262291485585,-0.291048503277811  
"Pcdh7",515.008367888294,-1.28629032240728,0.312927420578522,-4.110506  
90294019,3.94791477246876e-05,0.000482610923094645,-9.82249849467277  
"Rnf4",2835.21979789038,-0.898597324687541,0.267284289451819,-3.361953  
39625273,0.000773931844075334,0.00482883939064988,-4.79235354215985  
"Nelfa",917.876318564544,0.0395343399716317,0.0785705096584247,0.50317  
021161632,0.614844606245809,0.734168665109975,0.0122167628850068  
"Nkx1-1",0.0789318165836824,0,4.78471990596069,0,1,NA,NA  
"Man2b2",2037.43013372546,-0.16950503685406,0.135281753941504,-1.25297  
781789076,0.210213779526844,0.34398815734479,-0.180886969293905  
"Ppp2r2c",45.8496813222877,-0.613469008086012,0.570702836023218,-1.074  
93597256463,0.282403395203988,0.426349314726083,-0.522980047962838  
"Crmp1",46.339550203947,-1.4702870860932,0.656795488624328,-2.23857671  
308423,0.0251834708340064,0.0688677860198398,-3.93385125105983  
"Evc",6391.60477797046,1.24868783460089,0.365121896248664,3.4199204359  
699,0.000626394535846145,0.00410673862136118,6.861697096012  
"Stk32b",284.106793535843,1.50311585894508,0.479530924747445,3.1345545  
8526837,0.00172115229027838,0.00893458103779566,7.09143911262466  
"Stx18",1217.59291933139,-0.326467610901436,0.212188479354429,-1.53857  
368644468,0.123908406585421,0.232103574945003,-0.476829308792958  
"Nsg1",204.438467434866,-1.41495988558499,0.216833885983184,-6.5255477  
9050875,6.77534499555482e-11,1.76221515544072e-08,-25.2628481909267  
"Zbtb49",337.220213909401,-0.12063479639785,0.163330029911473,-0.73859  
53242232,0.46015276433829,0.599618143593097,-0.0617001448422969  
"Rab28",1367.18797681939,-0.37556066442295,0.24560011715542,-1.5291550  
7033447,0.126226005849205,0.235194011486839,-0.543565671325455  
"Rnf32",135.37290140963,0.533288801158988,0.289697177124079,1.84084914

617783,0.0656436684449923,0.142816363238168,1.03788434348351  
"Dnajib6",4842.38316384414,0.00569023899216897,0.174474207148861,0.0326  
136400626488,0.973982692420283,0.984025832261292,9.1630658087724e-05  
"Plb1",22.8222329117719,-0.679632464821342,0.993516936576035,-0.684067  
316621259,0.493932658964116,0.629951529597222,-0.31406658923509  
"Fosl2",3821.37077784034,-1.49046629447969,0.153005228176375,-9.741276  
89781664,2.01012445564806e-22,6.53223443937097e-19,-62.4093527291768  
"Rbks",405.766537497156,1.10201969854363,0.260696903356604,4.227206707  
69222,2.36610286184401e-05,0.000327425646559507,8.84288108343235  
"4930548H24Rik",53.1197957590416,0.354209424646882,0.407632035339883,0  
.868944032702293,0.384877743624501,0.529481848951564,0.225226327522361  
"Slc4a1ap",966.73074350121,0.275729794028613,0.107326192402853,2.56908  
204656744,0.0101968312044516,0.034367815872843,0.929384421951708  
"Eif2b4",1651.63499013004,0.45724388959439,0.206593664953288,2.2132522  
29674,0.02688026104216,0.0723910676519386,1.20057264368139  
"Snx17",3396.15723429183,-0.0928950468339337,0.169405348320662,-0.5483  
59586960004,0.58344501993349,0.70750736977817,-0.0321423581024692  
"Ppm1g",3569.66288706854,0.0547456114666375,0.0568263767128013,0.96338  
3812825513,0.335354946605556,0.479895775117426,0.040193479775944  
"Nrpb1",3898.27197105867,-0.151215926869783,0.0764667956440644,-1.9775  
371204733,0.047980948893049,0.112809904921822,-0.329960884732683  
"Krtcap3",758.739259734881,-0.119842947945219,0.238245462250676,-0.503  
023003305403,0.614948099270195,0.734247277377236,-0.0370206151744458  
"Slc30a3",10.5729483444059,-2.142981246383,1.00560420517474,-2.1310384  
6956429,0.0330859730611933,0.084813450231217,-5.28738006693737  
"Ociad1",5376.88889102734,0.0627494570684264,0.204861479238355,0.30630  
1884091239,0.759374804819118,0.844144238561183,0.010631759748785  
"Ociad2",976.634133062306,-1.12501093429971,0.356581632096824,-3.15498  
845996147,0.00160504453797667,0.0084833717542611,-5.36590536038679  
"Cwh43",414.205760943192,2.8203904446123,0.520721105161886,5.416316751  
23957,6.08392821323417e-08,3.14653666582599e-06,35.7321136949333  
"Spata18",0.833385576587899,-1.24233704359448,1.74733706498998,-0.7109  
88777429504,0.477091190236011,NA,NA  
"Sgcb",998.91760860253,-0.684080559732169,0.239821169160029,-2.8524611  
1562275,0.00433821196249968,0.0178301974799365,-2.75469785458231  
"Yipf7",2.35208504694664,-1.59632712893506,1.62951208765154,-0.9796350  
33720857,0.327266305155701,0.472048788280162,-1.19831956908329  
"Cgref1",5793.06064268979,2.15660718235406,0.668373084908226,3.2266517  
4742963,0.00125247798549357,0.00698935768779439,10.7040320951304  
"Khk",17471.1807244426,1.95310955156699,0.532258081875945,3.6694784317  
4733,0.000243045841689954,0.00196635179305839,12.1709493076707  
"Emilin1",4171.6918042613,-1.27676045056926,0.362953064372342,-3.51770  
125643428,0.000435302121432971,0.00309311981184405,-7.37785608394759  
"Agbl5",1078.64861801008,0.418916261805767,0.204892878526242,2.0445623  
3334685,0.0408980261801031,0.0996164540236914,0.966200165301041  
"Mapre3",2096.27808732485,0.414444338631016,0.155362593392163,2.667594  
10732082,0.00763964905443981,0.0274880747856555,1.48951420156107  
"Ppargc1a",2704.47437262207,1.19501002253325,0.275588723964705,4.33620  
797448264,1.44961794501553e-05,0.000225395938532,10.0352782764163  
"Dpysl5",31.6114583459444,-0.394616164286413,0.52169287976936,-0.75641

4702191973,0.449400595869196,0.590220451182647,-0.208064989592218  
"Dhx15",4461.90176583965,-0.234546377792666,0.130237284855858,-1.80091  
575198495,0.0717161598261572,0.152822041998952,-0.440590951532706  
"Pgm2",939.948644250674,0.323155455508736,0.218752634193527,1.47726429  
306833,0.139604805512242,0.253753565570775,0.443172708594225  
"Sepsecs",1973.71143126154,0.656809897648796,0.15463055832127,4.247607  
36027458,2.16065632847802e-05,0.000305304920043773,5.31635037332994  
"Tbc1d1",3406.61493806827,0.192065383153344,0.164841735109806,1.165150  
21529835,0.243958193540969,0.38298686454604,0.184335632411209  
"Slc35f6",1515.87439793544,-0.287158048975767,0.0848299244372208,-3.38  
510320362575,0.000711514975310101,0.00452482680645673,-1.5501296816919  
9  
"Anapc4",2185.62209101764,0.200993208879635,0.192561325504341,1.043788  
04182621,0.296583465392365,0.440961897202114,0.164572597894552  
"Cenpa",506.95511751129,-0.493659373599064,0.307313615438629,-1.606370  
00379714,0.108192637530151,0.209134534208672,-0.772467095162418  
"Klf3",3042.27716600395,-0.526961222691734,0.111465524917747,-4.727571  
35518439,2.27221225269878e-06,5.27423744084772e-05,-5.19061618512833  
"Zcchc4",979.810869483031,0.296325258900492,0.173921309078012,1.703789  
26234724,0.088420464725377,0.179623069516087,0.508759261131204  
"1700001C02Rik",0.163890645083712,0,4.7847199059659,0,1,NA,NA  
"Olfr109",4.69287517654586,-0.304214169435442,0.894831901882607,-0.339  
967952411414,0.733880662275525,0.825975822734252,-0.0581626389672939  
"Fam114a1",1121.95787885814,-1.12400892510634,0.194100843735643,-5.790  
85027902915,7.00309836862256e-09,6.01526044014989e-07,-16.100074549924  
9  
"Pi4k2b",1209.82249210853,0.0226826475791644,0.112008150084139,0.20250  
890280864,0.839518899161722,0.897124821651609,0.00246243439159679  
"Slc34a2",664.791561976782,-0.229448748768421,0.647484314881675,-0.354  
369586250675,0.72306192427283,0.817195768575913,-0.0463203319003466  
"Sel1l3",1990.7163639473,0.796693816236713,0.262165442987314,3.0388971  
4509499,0.00237445906646172,0.0113892258002142,3.56527451902418  
"D5ErtD579e",3499.78250953079,-0.241806978466098,0.242907682410883,-0.  
995468632634998,0.319508392789745,0.464665729102311,-0.185329813714814  
"Rfc1",1810.54723067724,-0.157896642722788,0.12606010295029,-1.2525504  
8209069,0.210369345478034,0.34419581254768,-0.168403805501218  
"Tbc1d14",2473.93749675487,0.334243781278514,0.171266062474117,1.95160  
545206689,0.050985065452585,0.118135092833571,0.713920134798822  
"Cckar",2090.56710939542,1.868808183267,0.777065539489418,2.4049556804  
371,0.0161744272177791,0.0489323478498459,5.63878593673249  
"Klb",170.320870535638,-4.59032486718581,1.3093908052539,-3.5056950520  
5568,0.000455416674209601,0.00321019062813076,-26.3550057572973  
"Tada2b",1057.44598758388,-0.0522442968353305,0.230982735571004,-0.226  
182691559952,0.82105933194719,0.885258507758588,-0.00636730384603869  
"Grpel1",3149.64085637887,0.182094501211008,0.392526527575517,0.463903  
681454944,0.642716755110106,0.755968588474202,0.0509419297302898  
"Lias",2137.01644447048,0.181542688749939,0.275959283113348,0.65786041  
5862042,0.510627828405964,0.644832992115251,0.0796543822474072  
"Ugdh",5404.12954309039,-0.618970219522428,0.401567526908547,-1.541385  
14208942,0.123223077971131,0.231064009836614,-0.906828824241326

"Pds5a",3964.68048045405,-0.0973171168617847,0.0784661388025006,-1.240  
24347759397,0.214885351574814,0.349677398181082,-0.102255402820644  
"Ube2k",3532.3355062608,0.0369130132080788,0.218879765556505,0.1686451  
6057127,0.866075756287717,0.915816752323765,0.00324609296535792  
"Rhoh",226.040435413677,-1.67041755035643,0.452725697075763,-3.6896901  
6149505,0.000224527342873011,0.00185344374739118,-10.508112196492  
"Chrna9",0.409070079979442,-1.15224946028544,3.18367318097848,-0.36192  
4542748229,0.717408419017919,NA,NA  
"Nsun7",186.305692168715,0.736609946406977,0.37269683571336,1.97643198  
391279,0.0481058720777533,0.113076346446297,1.60558284865583  
"Apbb2",2502.56642372131,0.282999439084366,0.130794560671146,2.1636942  
5175031,0.0304878224669989,0.0796424922912037,0.71604730491147  
"Guf1",2328.018991489,0.391843318227463,0.109115731156119,3.5910799852  
2071,0.000329310545010781,0.00249065050683483,2.34918351077896  
"Gnpda2",962.179181369735,0.231940181309231,0.120310966852833,1.927839  
06053173,0.0538751475438329,0.123059855728471,0.485934257922322  
"Gabra4",111.507370115515,0.00764005236338871,0.574869341468196,0.0132  
900675201713,0.989396372460413,0.992978528091061,5.38336306663312e-05  
"Gabbr1",90.4920745923692,0.19634901827344,0.532006302948542,0.3690727  
29374096,0.712073515061503,0.80895003185161,0.0416295515161045  
"Commd8",2205.12001546582,-0.24728141651135,0.163247466818695,-1.51476  
418795511,0.129832132648926,0.239881258636289,-0.353021728110268  
"Tec",744.030611830533,0.232933600135087,0.327452081858311,0.711351715  
381298,0.476866312024628,0.614293033288597,0.113504632803189  
"Slc10a4",20.4260337153018,0.261904480648253,0.676017841827539,0.38742  
2438348999,0.698443494934998,0.798911842323278,0.0587987801303318  
"Slc30a9",6549.34017133796,0.724875748938484,0.153250456211732,4.73000  
711943715,2.24511963640346e-06,5.23628500844433e-05,7.14532727817073  
"Uchl1",1356.33968437811,-1.69924242786455,0.49294336263341,-3.4471352  
2216188,0.000566564930897416,0.003803927744183,-9.46770493892125  
"Fip1l1",2709.46795436639,-0.166331430486387,0.134106999577332,-1.2402  
8895591294,0.214868535854036,0.349677398181082,-0.174771797342451  
"Lnx1",289.293652443836,0.513945430081939,0.330492431221438,1.55508986  
448644,0.119924668509982,0.226381177907602,0.763483961768477  
"Chic2",1475.88342536944,-0.496289699774083,0.227441128429258,-2.18205  
785031728,0.0291052634605157,0.0768337973129077,-1.27353429224057  
"Pdgra",3594.12989338485,-1.26392709539821,0.285688445658142,-4.42414  
495443275,9.68249955179797e-06,0.000167070244478723,-10.992495549037  
"Srd5a3",852.117931646429,0.0191793749721779,0.185186516522722,0.10356  
7880277205,0.917512278375059,0.949355466130168,0.000996790118330657  
"Tmem165",1883.19540791237,-0.304685462307557,0.136008146079216,-2.240  
20009897126,0.0250779352513397,0.0686292075218737,-0.816263647979796  
"Pdcl2",0.100283711116373,0.85015961336909,4.78471990596623,0.17768221  
1305409,0.858972556261423,NA,NA  
"Clock",2602.03103781905,-0.248154171650977,0.159575391842042,-1.55509  
047345229,0.119924523497745,0.226381177907602,-0.368641725389515  
"Epha5",795.36114010709,0.97173861445113,0.383628385880707,2.533020626  
77214,0.0113084298247447,0.0373208809618945,3.19527314476064  
"Ppat",1621.83138875805,0.634532761315283,0.277075679639113,2.29010630  
648548,0.0220151548840744,0.0620843925267114,1.76353193447107



"Paics",7705.30923544124,0.394318249587914,0.228722594833897,1.7240021  
6897799,0.0847074516062496,0.173837058353716,0.689913745922836  
"Thegl",0.251688987505115,0.0331084650725692,4.78471990595309,0.006919  
62449701099,0.994478982506144,NA,NA  
"Rest",2165.49549436541,0.313539354500479,0.233695068371039,1.34166012  
439197,0.179706221832214,0.307123200566775,0.370135185517646  
"Polr2b",1714.809634436,-0.245557082498587,0.207117682733075,-1.185592  
07141696,0.235783434866479,0.373643157755738,-0.24173966699473  
"Cenpc1",697.65764380259,0.0156265184713292,0.213640645666518,0.073143  
9395466037,0.941691576575317,0.963817152236969,0.000575894687271433  
"Stap1",520.791474781058,-0.606385451606327,0.396096095447478,-1.53090  
48954933,0.125792899158364,0.234706341352565,-0.878907296784387  
"Ugt2b34",556.831890609068,-0.576689919623278,0.494350455992418,-1.166  
56091368534,0.243387735710842,0.382214406482764,-0.554645113734022  
"Pigg",1043.54091032587,0.431094442378269,0.197004158473109,2.18825047  
003824,0.0286513625925944,0.0760267103743067,1.11078835314602  
"Dr1",1848.24047191912,-0.160371810993262,0.19615172809075,-0.81759060  
9852112,0.413590991161782,0.557052354056913,-0.0938329132318791  
"Mtf2",1694.90013894303,0.177783482975967,0.145383028885411,1.22286269  
820457,0.221381559496106,0.357240407713861,0.183000772692049  
"Ugt2a2",15.591163217479,2.00001120420232,0.984858324853787,2.03076031  
722557,0.0422793143287627,0.102252799650486,4.56063975700057  
"Sult1b1",82.9045237404373,1.85442139099869,0.598417295317133,3.098876  
66267389,0.00194255869860554,0.009767202047965,8.58360709056749  
"Dipk1a",961.655354431661,-0.0560741336835605,0.137577432791444,-0.407  
582352322013,0.683580322752177,0.787268111814645,-0.0134121708884502  
"Sult1e1",15.7489873057987,-4.12710991567783,1.11664672859997,-3.69598  
531923548,0.000219035629868585,0.00181811694813864,-26.0418735450015  
"Sult1d1",15414.9422254559,1.96741903747312,0.702234233128774,2.801656  
40559471,0.00508409899122552,0.0201442312804136,7.68245128237304  
"Gfi1",65.2227612178844,-1.50442637800074,0.509012492251887,-2.9555784  
99351,0.00312083268118882,0.0139295754550897,-6.42952864601924  
"Glmn",284.18888967473,0.182368115660955,0.209778789543814,0.869335341  
564004,0.384663737651955,0.529262123825969,0.11603562751357  
"Brdt",124.760072276054,-0.108883339945158,0.257733171011212,-0.422465  
371911408,0.672685370967982,0.778687386312288,-0.0272366900253662  
"Cdc7",271.681196583178,-0.882085888684591,0.265628433011479,-3.320751  
01556042,0.000897755882061235,0.00542437068126122,-4.60171275842487  
"Enam",0.0789318165836824,0,4.78471990596069,0,1,NA,NA  
"Tgfb3",2115.75707077431,-0.63372191083701,0.179313135716019,-3.53416  
334116563,0.000409068192678193,0.00294643946096764,-3.6927975757521  
"Zfp326",1768.39743306088,-0.0580835983269365,0.196808221886441,-0.295  
12790558339,0.767896173055276,0.849936453053083,-0.00944402677831893  
"Rufy3",4021.7351239037,1.08113305589824,0.200812665931914,5.383789169  
27879,7.29339261541422e-08,3.56407441642472e-06,13.5623884020382  
"Gbp9",1104.33650423543,-0.960901368122446,0.319086478488905,-3.011413  
62264229,0.00260034373383659,0.0121878610871024,-4.23499483590011  
"Abcg3",141.224503105621,-0.952253193796939,0.344194888702385,-2.76661  
050193666,0.00566423848314385,0.021822035550956,-3.64221135823461  
"Spp1",147211.097291917,-0.166074280313068,0.554905197046017,-0.299284

06004692,0.764723315775433,0.847721599351265,-0.0274359692882371  
"Ibsp",8.74147643562378,-4.88772509620626,2.01601568402378,-2.42444795  
193796,0.015331680867122,0.0468994530196337,-14.9552132769555  
"Dmp1",2.12197930043872,-0.485636584975079,1.07004432817898,-0.4538471  
65193187,0.649938833682262,0.761477429343634,-0.132333418268718  
"Sparcl1",7371.25298780017,-1.64398226394225,0.256296105968107,-6.4143  
8642905808,1.41391148590649e-10,3.16878691404653e-08,-28.387187399495  
"Nudt9",2442.19350219728,0.14696648158305,0.17245770460129,0.852188552  
102247,0.39410944945886,0.538572052533561,0.0909478540540483  
"Hsd17b11",8875.81866381589,0.820265928692792,0.311621568731628,2.6322  
5017456739,0.00848213788196441,0.0297561576866754,2.88300439830061  
"Klhl8",467.795588779031,0.332742884735395,0.154759675919909,2.1500619  
1217146,0.0315503178501972,0.0816522560981078,0.833616033700804  
"Aff1",3553.60529485753,0.0420414682523218,0.122296170147136,0.3437676  
60113486,0.731021023081676,0.823832860708391,0.00814711559437252  
"Gpat3",640.279533996632,-1.68243599664639,0.673001546808386,-2.499899  
15272127,0.0124228664600593,0.0399572831141927,-5.4173502272089  
"Coq2",3719.43440662198,0.285406290206634,0.12965291185399,2.201310299  
36333,0.0277140642447474,0.0740364568469885,0.7429689831051  
"1700016H13Rik",1.8790664133808,-3.98541175467465,1.51690835710126,-2.  
62732533314708,0.00860590109462775,0.0300605266110806,-13.967044380645  
3  
"Slc10a6",150.831051746067,0.108329113660105,0.281992487639224,0.38415  
602687508,0.700862807840936,0.800973102296822,0.024041254071795  
"Plac8",1747.56793101079,-1.05973104914138,0.375603753302657,-2.821406  
97430003,0.0047813502538793,0.0191864102181804,-4.18970292330815  
"Enoph1",627.756607896934,-0.315872138512831,0.111045378494979,-2.8445  
3205341737,0.00444767105941295,0.0181523546702427,-1.26631718677374  
"Hnrnpd1",8074.36220990601,-0.255425991721384,0.0937865526496501,-2.72  
348203985657,0.00645977278246412,0.0242116654104184,-0.950419865076664  
"Cds1",2520.35657161164,-0.232172168642277,0.225872077221128,-1.027892  
29859068,0.304000492656895,0.448739617368775,-0.186042455366428  
"Prkg2",394.622155481857,-0.93597717220206,0.415021004135959,-2.255252  
53631606,0.0241174819997726,0.0664653942094086,-2.53750324005712  
"Bmp3",671.549721467944,-1.60802608433876,0.450015344154076,-3.5732694  
5675924,0.000352551643747329,0.00262168266582206,-9.55800884073309  
"Fgf5",0.350618861579457,-2.43677084655973,4.73945718277076,-0.5141455  
55617228,0.607150229201517,NA,NA  
"Antxr2",815.983089018644,-1.2329146210739,0.187243536729342,-6.584551  
02167857,4.56262029934164e-11,1.30826427347887e-08,-22.3798408867677  
"Crybb1",12.5856076811532,-1.53502693726919,0.850834855819445,-1.80414  
20456274,0.0712090418426855,0.152073811374445,-2.8910532702652  
"Tpst2",1279.7177099165,-0.508017589442871,0.120790219718467,-4.205784  
13241519,2.60178485269487e-05,0.000350778232908731,-4.0414609557063  
"Tfip11",1368.83233542877,-0.0299248959770512,0.0858246019978473,-0.34  
8675033503817,0.727333289730534,0.820786230070954,-0.00590994494074015  
"Srrd",468.255358850225,0.0448336127455301,0.13196405241349,0.33974110  
3168389,0.734051505063428,0.826072737257689,0.00856646821637674  
"Asphd2",29.9104154613239,-3.07848033534427,0.631804171389651,-4.87252  
296636972,1.10182042929417e-06,2.99210233013619e-05,-32.0683732793917

"Crybb3",118.558578755226,-0.534915828509879,0.241423688876884,-2.21567250089805,0.0267139395349759,0.0720725602674638,-1.40687243106876  
"Tesc",817.83668663486,1.38743599082445,0.41853405047196,3.31498951939491,0.000916465606364471,0.00550500505018314,7.21757742612669  
"Nos1",41.7850304056128,1.11215835485443,0.292130112303858,3.80706509877909,0.000140625737792225,0.00129720639021244,7.39311966079865  
"Rfc5",623.502872123265,0.00239255547595892,0.365587932791811,0.0065444049470894,0.994778357606261,0.996772106305919,7.73540599502296e-06  
"Wsb2",4530.87436175469,0.233101101797075,0.135261064695585,1.72334220732098,0.0848266593259268,0.174026747005147,0.407588062816925  
"Dck",400.837815997286,-0.974413515575322,0.255198596497149,-3.81825577785342,0.000134398543016245,0.00125203191195927,-6.51199336180808  
"Alb",331.660394070093,1.2986786990213,0.575485246997638,2.25666723134369,0.0240288758958461,0.0662774115457924,3.52449209582183  
"Afm",1038.97371348935,2.20892955568358,0.635333598347581,3.47680267725289,0.000507431117956078,0.00350226263288765,12.4900521141301  
"Rassf6",1193.20903957344,-0.0204869300474274,0.153515883144457,-0.133451533664106,0.893836291868807,0.934428181805694,-0.00138943398351185  
"Cxc15",238.953551559582,-1.2383074681946,0.706548544935544,-1.75261484447267,0.0796681414753796,0.165869666042387,-2.22468492673971  
"Pbp",55.6924471604013,-0.12741305520013,0.544746562831785,-0.233894188405324,0.815067125072046,0.882212657080868,-0.0159676772813048  
"Pf4",362.034313373989,-1.57552966166593,0.250842534459336,-6.28095097612456,3.36508249802262e-10,6.56123785464451e-08,-26.0584751416706  
"Cxc115",4.21058465552941,-3.85299478070669,1.51129389194047,-2.54946757957152,0.0107887541760502,0.0359809069545836,-12.8103092954211  
"Mthfd2l",736.960542833417,0.460948081511495,0.132918559485526,3.46789856356884,0.000524545247632853,0.00359697894590595,2.59405952637682  
"Ereg",11.0873774881045,-3.42973686310574,0.843114588924482,-4.06793680024073,4.74312408580991e-05,0.000556112047054249,-25.7043027184655  
"Areg",27.4062460285429,-2.23712326332672,0.706415656298825,-3.16686534815471,0.00154091650056003,0.00822245592804336,-10.7401745154372  
"Cxc13",9.44444525260655,-2.21210552314088,1.17472484576955,-1.8830839673709,0.0596889896002965,0.133053151849386,-4.46183142376631  
"Cxc11",619.620183116624,-0.555557172669938,0.502888482945497,-1.10473234426836,0.269275583955197,0.411532790089232,-0.49326064563746  
"Shroom3",2562.29591620813,0.0511345537314299,0.25690962837621,0.199037124667629,0.842233704247332,0.898991228193709,0.00544490964507966  
"2010109A12Rik",17.5825556505292,0.318553723077617,0.471664324097178,0.675382272524782,0.499432925407756,0.634828199671814,0.144751088396321  
"Ccng2",2057.33978832015,-0.30700207129887,0.12588402593479,-2.43876908939901,0.0147373819032723,0.0456400051381836,-0.947706380950922  
"Tctn2",506.766075276748,-0.0231185797114826,0.1434506136586,-0.161160549417396,0.871966951900603,0.919801537987338,-0.0019326520409993  
"Gtf2h3",1053.8938904871,0.0391569373660589,0.120530193874387,0.324872433266532,0.745277621258268,0.834419928756458,0.00708812973942138  
"Eif2b1",1440.60432660615,0.165654049367336,0.190837545529107,0.868036994020497,0.385374080981271,0.529865582890687,0.10521217472691  
"Ddx55",1415.85979049961,0.198332275525583,0.219515375167781,0.903500610715733,0.366260264269416,0.511191312292418,0.133083212073584

"Tmed2",10158.8482970886,-0.170388575669695,0.174183393267998,-0.978213665912087,0.327968658863993,0.472637279873301,-0.127693805033447  
"Rilpl1",766.055812090313,-0.191390816251459,0.17755118065266,-1.07794730256327,0.281057274034648,0.425008122314842,-0.163762977544745  
"Cdk2ap1",3557.18466831209,-0.24029887415225,0.121851361904261,-1.9720655919378,0.048602122982117,0.113951028577994,-0.521925909844881  
"Rchy1",2267.33233960941,0.228702840563745,0.156975982544611,1.45692886807541,0.145136016368292,0.261394979415201,0.306855789193567  
"Rilpl2",1526.32837308149,0.165010543600993,0.197338865546373,0.836178636905241,0.403054414760887,0.546886219833526,0.0995862566754023  
"Snrnp35",361.897246351091,-0.19985424423955,0.199214420554447,-1.00321173378575,0.315758712741048,0.460966111187852,-0.154773272299225  
"Cdkl2",743.898981285733,0.102591038046395,0.140783610165372,0.728714357629317,0.466176408366444,0.604918648364763,0.0515685440916427  
"Arl6ip4",2467.04969211107,0.333855070713064,0.12706460106415,2.62744358316218,0.0086029106105882,0.0300566581904305,1.17005220861766  
"G3bp2",4785.17342657375,-0.602110473094578,0.232274383584948,-2.59223795496318,0.00953537927063857,0.0326103757462444,-2.06109927281378  
"Pitpnm2",1629.9951011921,-0.697721847270891,0.341615635667067,-2.04241777724389,0.0411101078249708,0.100008095118064,-1.60650744546092  
"Uso1",3654.74177137786,-0.052105706028895,0.160929798751455,-0.323779103889694,0.746105277411833,0.834819275736022,-0.00940716488558162  
"Abcb9",572.399763444846,0.21460321451969,0.180842613896784,1.18668498478005,0.235351899882079,0.37323231751938,0.211503103276336  
"Ppef2",95.6393757540471,-0.642585668108127,0.483438295415503,-1.32919893645546,0.18378234588244,0.311978772419973,-0.748496721849166  
"Naaa",2628.34165911449,-1.05249593064618,0.277269588389726,-3.79592993504505,0.000147091039885878,0.00134394615543339,-6.95925581122917  
"Kntc1",85.1100369485516,0.0440949129108751,0.543364505857376,0.0811516255396507,0.935321369793519,0.959685105942958,0.00181450844300871  
"Sdad1",1236.33415669281,-0.197579757095722,0.168858786259665,-1.17008869643236,0.241965276847315,0.380624362078979,-0.190850648263015  
"Slc15a4",764.583813862949,-0.305831209536796,0.180336706030048,-1.69588996200163,0.0899067210106721,0.181903211192911,-0.521222178937306  
"Cxcl9",1051.05533375171,-1.67644515383845,0.733825127812922,-2.28452950205575,0.0223404307830407,0.0627140236052259,-4.6423619525332  
"Ajm1",110.240570754725,-0.483694406082896,0.403389741336561,-1.19907463308378,0.230498926706448,0.367257668854232,-0.484512614983807  
"Rimbp2",2.65269689146716,-0.816360318072543,1.80297355312602,-0.452785520152044,0.65070319122418,0.762051070880455,-0.221839143411849  
"Rsrc2",4577.33804781361,0.0223247610944341,0.144249126471775,0.154765312210069,0.877006338503799,0.923169550728666,0.00178469422417589  
"Piwil1",0.121527413527063,0,4.78471990595379,0,1,NA,NA  
"Scarb2",4951.58476686892,-1.19339001355845,0.263555214531067,-4.52804553945858,5.95317537070721e-06,0.000113465311219989,-10.8407708695482  
"Zcchc8",2729.5577831987,0.291317354412063,0.167131533427951,1.74304243153281,0.0813262032730643,0.168386780441564,0.518979443473146  
"Stx2",1242.67688095487,-0.181591328245275,0.143830368286339,-1.26253815803184,0.206755204744758,0.339746182543081,-0.196038091866747  
"Ran",6794.55715338106,-0.540299371687428,0.283521315032238,-1.9056746

1083479,0.0566924353066263,0.128054256000972,-1.11047796312422  
"B3gnt4",2.99088790164142,-0.517516073411167,1.20407459783469,-0.42980  
3995817058,0.667338225972701,0.774740144686855,-0.132084386947114  
"Nipsnap2",3060.81592708558,-0.132213086996422,0.285491504667791,-0.46  
3106904530382,0.643287741168927,0.756356251194976,-0.0369195502373607  
"Diablo",2517.06112011484,0.172437125918022,0.136220715678303,1.265865  
65823987,0.205561183240739,0.338459039928047,0.18681013948275  
"Vps33a",1526.70883284692,-0.0796890369944424,0.176025287344945,-0.452  
713574262095,0.65075500374729,0.762051070880455,-0.0216548346542627  
"Mmp17",210.440836243054,-1.6781506554472,0.344769469236382,-4.8674572  
5821975,1.13043269761115e-06,3.03597475730333e-05,-17.4567824968  
"Il31",0.0721532113593249,-0.544048378937457,4.78471990596623,-0.11370  
5376621746,0.90947135024012,NA,NA  
"Bcl7a",5111.54105001347,0.849463544228457,0.261742500089839,3.2454169  
4198265,0.00117278771083339,0.00663966747556022,4.25979922515557  
"Sfswap",4256.9493070113,0.353959248773741,0.208345530433333,1.6989049  
2989002,0.0893370979906852,0.181070138942035,0.604870629861902  
"Psm9",1468.80407996749,0.132660564200462,0.174852821811752,0.7586984  
46075327,0.448032966677682,0.588756190336407,0.0702760210922897  
"Wdr66",611.249450204857,-0.272242394244251,0.416789661838879,-0.65318  
8932381661,0.513634484450681,0.647463094731714,-0.118341994733867  
"Hpd",636.54373132374,2.33187928808496,0.81794610693653,2.850896004406  
2,0.00435962256484004,0.0178917955734058,9.38211348656518  
"Psph",823.668688706351,-0.647282381117307,0.390070830503542,-1.659397  
03894734,0.0970358125767082,0.192786251642618,-1.06553891397138  
"Cct6a",6949.43930851285,0.145188722633003,0.173148316620007,0.8385222  
88100758,0.401737435423215,0.545744897643826,0.0879268178755804  
"Rhof",263.047720446643,-0.186314288643717,0.36407540440449,-0.5117464  
30518885,0.608828486282786,0.728814945084833,-0.0589378100204948  
"Tmem116",1449.15514284986,1.98859131366051,0.562589328953184,3.534712  
10938306,0.000408219654383814,0.00294250159747712,11.5904948785707  
"Mapkapk5",1966.40420184515,0.487022995854731,0.204768763611734,2.3784  
0472963046,0.0173877294261391,0.0516335589934299,1.44333329018835  
"Aldh2",26952.3028345915,0.0311411226807299,0.508690223756029,0.061218  
2448697213,0.951185399678966,0.969888762835502,0.000952105307581141  
"Acad10",2104.84369261833,1.24516555094435,0.308368617123986,4.0379126  
8565993,5.39289172654861e-05,0.000612765751073688,9.21114681649124  
"Brap",4349.5909889892,0.996577331167983,0.158330576779673,6.294282200  
17654,3.08825551995204e-10,6.23655985775684e-08,16.5334690799433  
"Fam168a",2046.04939829152,-0.276159270793154,0.135790689736652,-2.033  
71285121777,0.0419805556723829,0.101618482247067,-0.631446415608856  
"Vps29",4084.81180827448,0.478451431698333,0.145443055729899,3.2896134  
4560073,0.0010032510478521,0.00588666534186588,2.45687948700096  
"Fam216a",583.090672638003,0.0443228450013631,0.131683861699981,0.3365  
85246127922,0.736429579780128,0.827704291313188,0.00838142004880477  
"Gpn3",727.646480425923,0.332768543423945,0.149350454575415,2.22810532  
696379,0.0258734921538578,0.0703155716575755,0.883421284456578  
"Arpc3",6861.78134931427,0.0126176423680766,0.154615222031208,0.081606  
7279942838,0.93495945097726,0.959465230271295,0.000522107966407172  
"Anapc7",2649.54250884626,0.340262571332105,0.144515899842579,2.354499

20529681,0.0185476833633398,0.0542192998828184,0.991769559636491  
"Atp2a2",11524.3690470365,0.14012898205182,0.190447091317347,0.7357895  
62773207,0.461858773999338,0.601156366851741,0.0713116670616652  
"P2rx7",934.606583980529,-1.15915353358517,0.337077005087631,-3.438838  
94804339,0.000584214679372359,0.00388639297796051,-6.43361949521796  
"If1t81",992.275569356167,0.27341428525425,0.163043644751233,1.67693923  
716816,0.0935543644257572,0.187454834813834,0.457754938355481  
"P2rx4",3290.9531844457,-0.0687216025988742,0.21295136964606,-0.322710  
310401358,0.746914643022943,0.835437225198562,-0.0123561488328315  
"Camkk2",1889.43296542743,-0.0459833900780516,0.219385981490576,-0.209  
600402749648,0.833979565275415,0.89375155694601,-0.00516519662508551  
"Anapc5",12504.1107346268,0.0564352150438855,0.158487932926809,0.35608  
5248899975,0.72177672385739,0.816263706384281,0.0114573535753249  
"Rnf34",1053.09516702742,-0.0524135376463546,0.157775502536486,-0.3322  
03268591928,0.739735775806624,0.830394570563789,-0.00974128160820097  
"Kdm2b",1122.89764820388,-0.314694145172799,0.191930380412613,-1.63962  
653799919,0.101082841768357,0.199041935851286,-0.507991796196546  
"Morn3",2.43892572707901,-0.0560338731215999,1.30347934949712,-0.04298  
79254651926,0.965711159039829,0.979271696430132,-0.00117369394011747  
"Ncor2",4250.3243989688,-0.256210570773381,0.194223478257722,-1.319153  
44669817,0.187117818139081,0.315913884789154,-0.295227756144253  
"Dhx37",908.028283177413,-0.0150587443552449,0.226075689799327,-0.0666  
093040282731,0.946892738654668,0.967309892988783,-0.000500497945221077  
"Aacs",6270.70972551785,-0.711839096017175,0.627096642076993,-1.135134  
60008255,0.256318926350001,0.397171877473188,-0.657302363179324  
"Anxa3",3445.77758233646,-0.706199846611935,0.267056372080864,-2.64438  
49330736,0.00818395270913951,0.0289664321535938,-2.50108982803519  
"Mrpl1",1110.4357472273,0.232712487201769,0.26135531407255,0.890406564  
0585,0.37324761904765,0.518462851644006,0.152865784238517  
"Mfsd7a",539.976804648968,-0.0368336926674267,0.190729038088055,-0.193  
120528665495,0.846864575730043,0.902205523854463,-0.00379066328584409  
"Pde6b",0.216813168483108,-1.39575995508774,4.76764712241052,-0.292756  
556693745,0.769708236753709,NA,NA  
"Pxmp2",1264.94258450799,1.09947059731587,0.43733528298153,2.514022170  
40492,0.0119362929968192,0.038847244341843,3.57121038647645  
"Pgam5",1159.42684484452,0.0647194136265362,0.128915197953123,0.502030  
906007452,0.615645781074949,0.734751291440922,0.01994802580718  
"Ankle2",1634.97522010872,-0.212923611821379,0.110495142473887,-1.9269  
9522399094,0.0539802251424393,0.123215456547329,-0.445823882295232  
"Golga3",1792.70030250659,-0.299699499958479,0.136891228553826,-2.1893  
2581089836,0.0285731676449324,0.0758398615220381,-0.772964345041059  
"P2rx2",23.1811315186316,-1.05300791228865,0.640902557066387,-1.643007  
81870586,0.100381315574707,0.197920405609832,-1.70575732502914  
"Ddx51",809.421767270801,0.235575360152459,0.359973744057376,0.6544237  
29623211,0.512838850427334,0.646943486948844,0.102592205865763  
"Ep400",3588.07231098105,-0.188543427271349,0.189220385302234,-0.99642  
2383191939,0.319044961984563,0.464095692985303,-0.144738098301489  
"Pus1",1513.63209589999,0.48286929696709,0.129792031526732,3.720330834  
54462,0.000198961974516003,0.00169109005192373,3.08185628847124  
"Gpc2",472.575427527466,-1.813849635698,0.37066243387343,-4.8935351142

6349,9.9040633472922e-07,2.75589540336503e-05,-19.0439393773481  
"Ulk1",3285.94594458902,0.0436713987550525,0.171938330272846,0.2539945  
49590839,0.799499768854713,0.872022897947082,0.0059803437155608  
"Prkab1",2765.22921087215,0.117218070987776,0.111012558541073,1.055899  
19310262,0.291014272824811,0.43463778564061,0.0976710517247835  
"Cit",633.638588386009,0.620001977671019,0.339562908652416,1.825882515  
05899,0.0678679604869945,0.146576151260015,1.19053411023126  
"Ankrd7",1.65554876459847,1.83288850772328,1.04742374201719,1.74990162  
452628,0.080135290333108,0.166504464078745,3.28588000388077  
"Rab35",2162.82050898608,-0.307883166515095,0.0840186942557909,-3.6644  
6026378081,0.000247860715356454,0.00199619505494429,-1.91395951714278  
"Chek2",473.83388258369,0.0395361302689877,0.346886413270248,0.1139742  
83098215,0.909258179692371,0.944413356295671,0.00226112392236418  
"Pla2g1b",2.79157189861427,1.46428452233493,0.963416134945508,1.519887  
89602091,0.128539153050061,0.238259949250889,2.10035943605997  
"Sirt4",1004.05220445622,0.501956426528109,0.151847075618602,3.3056706  
8534717,0.000947493754099166,0.00563410589125512,2.59959057757539  
"1700123K08Rik",2.16716047944131,-0.88091641117776,1.54991804409012,-0  
.568363220582351,0.569788359011512,0.696797128951736,-0.31824072052584  
9  
"Pxn",6561.31802704316,0.142011250848758,0.152888202141307,0.928856830  
414579,0.352963287840164,0.497943577621555,0.0990199727606391  
"Ccr9",62.8054892639893,-1.08156168628628,0.508057668246531,-2.1288167  
7392863,0.0332694225787447,0.0851295539947983,-2.66451484035501  
"St7",447.275234073525,0.395510748774624,0.196029457166945,2.017608753  
75885,0.0436320244784626,0.104873916824589,0.891875331457264  
"Triap1",863.110872583618,-0.49960269345938,0.277076085018742,-1.80312  
455846049,0.0713686550613489,0.152310882701077,-0.940168118984107  
"Gatc",760.631040028373,-0.0283751516995175,0.21039380320236,-0.134866  
860466541,0.892717141631633,0.933808949974977,-0.00194322720509746  
"Srsf9",2523.03622667659,-0.0885733609786631,0.142100182332065,-0.6233  
16307727752,0.533076683375721,0.665254043296199,-0.0361012877077689  
"Cyp2w1",0.271943130842482,-0.383314022047795,4.77572921836925,-0.0802  
629304386491,0.936028140285264,NA,NA  
"Cabp1",290.45636022906,-0.616307621926421,0.391623135421474,-1.573726  
28474346,0.115550742417959,0.219943244534619,-0.933327477365286  
"Acads",7260.2925301835,0.367666870761453,0.481385444775897,0.76376815  
0349073,0.44500541999126,0.58620535095352,0.196365405725425  
"Uncx",54.077896322939,2.4854239204898,0.760660356332257,3.26745557304  
18,0.00108518897173506,0.00626484147062252,12.6080634220953  
"Ints1",2260.74913435861,0.0745695081168955,0.152449114268705,0.489143  
597026482,0.624740037863445,0.74207622651608,0.0222443310916808  
"Sspl3",2623.3444889396,-0.153871379231415,0.0814532477346478,-1.88907  
604682242,0.0588816395341215,0.131629695899599,-0.31201463306504  
"Psmg3",825.212111669885,0.178559690391364,0.222587506661883,0.8021999  
66517447,0.42243729575449,0.565628512060229,0.101746481980149  
"Tes",1670.98954947081,-0.456257638629873,0.243010110215531,-1.8775253  
3516078,0.0604461283098431,0.13430085620139,-0.916016050953234  
"Tfec",864.867214940178,1.28441777925634,0.584481774951513,2.197532642  
25029,0.0279824278537891,0.0745507491397438,3.33470201259246

"Mad1l1",587.044639895942,-0.121403371552588,0.159539702574492,-0.7609  
60247471334,0.446680811411578,0.587796616110073,-0.0645106293773993  
"Hnf1a",1129.49299462617,1.95647782366576,0.677635376278645,2.88721323  
02332,0.0038867072899792,0.0164418056423236,8.03707015672239  
"Mrm2",503.470793013698,0.235362027137087,0.232239066290757,1.01344718  
13731,0.310846612873073,0.456117343302165,0.184760408305265  
"2210016L21Rik",2151.96294678333,0.288948654435133,0.146985331063605,1  
.96583327291412,0.0493178729686174,0.115161663130791,0.624538930095691  
"Snx8",3253.34089476832,0.874056369708088,0.215840201125798,4.04955316  
548591,5.13155193048448e-05,0.000589271394818223,6.50002832131675  
"Oasl2",1982.08635044951,-0.880974368886049,0.330767482471329,-2.66342  
496034934,0.00773496615768575,0.0277644274931069,-3.1574118422867  
"Foxp2",220.521842286281,-0.853093119020919,0.361235656471934,-2.36159  
721150672,0.0181964005088567,0.0534338828499583,-2.49897439551546  
"4930519G04Rik",5.82908390087451,0.114656859825191,0.579566055281242,0  
.197832255323429,0.843176308794124,0.899603374493452,0.012130845717710  
4  
"Tmem168",1853.72887177966,-0.213387487465201,0.109649038597837,-1.946  
09538025999,0.0516432834297925,0.119202342055509,-0.453860862507939  
"Lfng",1062.4357219392,-1.15323119884164,0.236241128809039,-4.88158520  
34547,1.05236435401677e-06,2.91463070662202e-05,-12.0434036902087  
"Tmem106b",9006.08278568588,0.695957816996153,0.198528213199799,3.5055  
8646440715,0.000455602491343019,0.00321019062813076,3.99578958014241  
"Mmab",973.51297506044,-0.771563290166715,0.355979171629164,-2.1674394  
2246846,0.0302013640394029,0.0790636675671695,-1.95784326270424  
"Radil",94.2724372069822,-2.31171242437703,0.565490126755356,-4.087980  
16977072,4.35145339215055e-05,0.000520261834844208,-17.4792699220735  
"Ube3b",3899.83658800676,0.234978163355352,0.129900355875749,1.8089108  
5148458,0.0704648542857913,0.150864579868712,0.444431275421525  
"Wipi2",5218.1447861357,0.346263644168126,0.165686103026877,2.08987741  
181864,0.0366288131546166,0.0916566477013238,0.827468229712045  
"Actb",84657.3317931993,-0.802846350083558,0.16187725523867,-4.9595994  
7492221,7.0638669137308e-07,2.07426622114342e-05,-8.65734749985132  
"Fscn1",1716.88005790248,-1.55563235645861,0.287203171583839,-5.416487  
38723801,6.07812761484703e-08,3.14653666582599e-06,-19.7086301773147  
"Spdye4b",0.0874363708740191,-0.193076388122813,4.78471990596623,-0.04  
03527044251972,0.967811935912226,NA,NA  
"Zfp12",1237.23256941014,-0.0618756849498317,0.12068401794831,-0.51270  
8194521114,0.608155456683543,0.728311736237813,-0.0196162079088397  
"Ung",203.370767009376,-0.412184473532799,0.211601824035269,-1.9479249  
5486286,0.0514239433279446,0.118827215810413,-0.877987885568523  
"Usp30",1067.48187313348,0.0766714261845962,0.1337168614973,0.57338637  
2713693,0.566383115090435,0.693801532472899,0.0280287223327343  
"Rbm19",584.134473916894,0.164403045125159,0.13154863002559,1.24975110  
035869,0.211390484062039,0.345325899063672,0.174804278799998  
"Lhx5",9.7527434573823,0.471980540538192,0.76488887009406,0.6170576654  
88257,0.537196690781037,0.668683674466845,0.18994581408842  
"Sdsl",453.233580967578,0.454161534752911,0.300115595921311,1.51328868  
251149,0.130206346199391,0.240348809412589,0.647481767636112  
"Sds",1.88040416398935,3.09514310619918,1.69239302129627,1.82885598513



548,0.0674211854268801,0.145788873622414,5.95999448807921  
"Plbd2",2758.77553453224,0.177063364848487,0.111475113025796,1.5883667  
6673755,0.112203427813352,0.215096100236431,0.272088026884306  
"Ddx54",2790.61110185223,-0.199190286167104,0.0930300199515989,-2.1411  
3988442373,0.0322627591467468,0.0831319251808206,-0.495451271953914  
"Rita1",339.966800324721,0.346363938921454,0.213383798329991,1.6231969  
8886329,0.104547301341971,0.203968709382205,0.550645470048638  
"Iqcd",135.148318794958,1.32981808262805,0.322768448195062,4.120037414  
01758,3.78810881775849e-05,0.000466880820029425,10.1989553894448  
"Rasal1",231.9614642791,-1.46943264841107,0.802917961346458,-1.8301155  
5246179,0.0672326618147097,0.145461877503685,-2.83283285457928  
"Dtx1",59.6748737317514,-0.76173404860045,0.451629755410002,-1.6866338  
8422874,0.0916737723270204,0.184749892799198,-1.28638012610673  
"Oas1b",476.015947364021,-0.451077777971304,0.295338017660379,-1.52732  
71675102,0.126679677166672,0.235709547227385,-0.651877289992801  
"Ankrd61",11.4766137515406,0.305233085816811,0.462115537277152,0.66051  
2493510358,0.508925003737846,0.643288397429534,0.13465728034451  
"Rph3a",12.2032993197869,2.20275352830613,1.11281503124935,1.979442644  
50948,0.0477661912146964,0.112426991345262,4.81401041625345  
"Aimp2",940.870817593205,0.139882717177575,0.124446562115874,1.1240384  
2098368,0.260996726960462,0.402476604102743,0.127309822193035  
"Eif2ak1",2527.2679675342,0.292877418128002,0.136365347641653,2.147740  
78014041,0.0317343538246463,0.0820523048498811,0.73231021920275  
"Rpl6",29209.388644183,0.380318221756555,0.163007532026815,2.333132813  
11437,0.0196411757556137,0.0566514267578337,1.09183204355356  
"Erp29",6542.51015228025,0.326467276475958,0.186936781071513,1.7464047  
1824038,0.0807406506693975,0.167485977892604,0.583349895975228  
"Ccz1",2316.60720775328,0.278745513430152,0.134431610878244,2.07351166  
596236,0.0381246865603007,0.0945143214943094,0.657561754894995  
"Ocm",0.102112886877019,0,4.78471990595847,0,1,NA,NA  
"Arpc1a",4447.91708464104,-0.342775080932335,0.211334814052313,-1.6219  
5274105423,0.104813467458839,0.204304007648951,-0.544376928821421  
"Arpc1b",8975.92732249058,-1.13517705125141,0.173756505100226,-6.53314  
850339914,6.44012288984377e-11,1.72013035761882e-08,-20.2950139286532  
"Pdap1",5967.92197745464,0.438183009529084,0.19417150840429,2.25668025  
721225,0.024028061364427,0.0662774115457924,1.18918756022759  
"Ptcd1",868.903130549355,0.285841324875807,0.117090332505635,2.4412034  
6026048,0.0146384049538569,0.0454345144524518,0.883673663018645  
"Cpsf4",1133.83047510113,-0.0456198927754782,0.0954611709437133,-0.477  
889515962224,0.632728843751422,0.747965744844503,-0.0132479300801319  
"Zkscan14",442.493304921066,-0.00579003378932632,0.162477786692828,-0.  
0356358484884624,0.971572723505215,0.982603261106138,-0.00010161416890  
6889  
"Phf14",2627.18086079841,0.501678139595202,0.21630879229592,2.31926836  
755154,0.0203804894775632,0.0583008779098485,1.42583856815193  
"Cyp3a25",2.51471282539855,0.2421943768084,1.69883891558115,0.14256465  
0825384,0.886634016798741,0.929540276349169,0.017695966426719  
"Ndufa4",17313.6115421483,0.634358521690886,0.506804603186033,1.251682  
63607509,0.210685529699786,0.344495679070232,0.676019212740827  
"Gm5578",1.07420713757917,-1.73976542959392,2.26860747493495,-0.766886

933423248,0.443148743156701,NA,NA  
"Rnf6",2703.37485138332,0.316599977214468,0.110436942680216,2.86679411  
37344,0.0041465267028325,0.0172349131638943,1.28565492343597  
"Cdk8",2654.33252204256,0.321318571798302,0.119722033270037,2.68387165  
688672,0.00727750374865891,0.0265624799871493,1.16582590292365  
"Wasf3",719.977835591412,0.415694552111467,0.317984790978994,1.3072780  
9601097,0.191118280539894,0.320966772951494,0.472402635283462  
"Glcci1",993.514589917135,0.0657601100223127,0.32624778729916,0.201564  
922682564,0.840256869969325,0.89775756004222,0.00709257145010143  
"Usp12",2631.14881015545,-0.152081694193595,0.0905656476921378,-1.6792  
4260543656,0.0931047716304051,0.186841921725811,-0.255115879800256  
"Rasl11a",1127.56240164417,-0.764872698363881,0.354749115881723,-2.156  
09472757332,0.0310762691237004,0.0807900127165214,-1.92434469502609  
"Polr1d",4606.29164588495,-0.0659600410236408,0.276911167723915,-0.238  
199280895034,0.811726534833266,0.880013565536782,-0.00843087763754369  
"Pan3",4211.44055473411,0.300914454984385,0.18821226110027,1.598803676  
36661,0.109864231927888,0.211589568760367,0.467352309481171  
"Flt1",4459.94550671542,-0.0444400775739699,0.225385940828386,-0.19717  
3246080187,0.843691966158434,0.899907328017349,-0.00468680566922663  
"Pomp",5355.38156683065,-0.270579756438054,0.249429198779277,-1.084795  
83690398,0.278012089788975,0.421645902824007,-0.233669812224525  
"Slc46a3",967.505287727224,0.731760397702608,0.188355840196188,3.88498  
916168683,0.000102334453568371,0.00100773594731116,5.04918267408278  
"Mtus2",79.3903090996999,-1.83775200091776,0.544879882959811,-3.372765  
37158063,0.000744173367409369,0.00468363212322397,-9.85711617983914  
"N4bp2l2",2355.70976386028,0.203615205083697,0.0891030476338267,2.2851  
654403614,0.0223031288074526,0.0626599269455372,0.564020869828776  
"C8b",1.10340272805288,2.24102943654224,1.68361791144718,1.33107958837  
045,0.183162824453591,NA,NA  
"Hsph1",5763.26801540009,0.495392360530872,0.22989034483984,2.15490720  
532871,0.0311690964370578,0.0809665657247206,1.24527717839745  
"Wdr95",11.913501485657,-0.910422053577806,0.619190173553272,-1.470343  
1877048,0.141468829799158,0.256281635549938,-1.23951987010165  
"Medag",271.444514638645,-1.7421810529605,0.315266051526639,-5.5260661  
4167365,3.27490710949564e-08,1.95871591475294e-06,-22.8978713762694  
"Tex26",4.62759011658255,-0.654453442502916,0.796557584793554,-0.82160  
2172895677,0.411303352218245,0.554835530756285,-0.385527757306403  
"Col1a2",23632.679289204,-1.3887775374315,0.36455287409227,-3.80953665  
744519,0.000139227463868081,0.00128717737814123,-9.24273605685086  
"Gngt1",0.495202687383534,1.69934662421739,3.06405797020011,0.55460655  
1424484,0.57916380690145,NA,NA  
"Tfpi2",491.424847124761,0.628690976249618,0.352523961277989,1.7833992  
7297553,0.0745213315127877,0.157474468606951,1.16213020105279  
"Tspan12",2122.02457080916,-1.13674132406132,0.466530730072535,-2.4365  
8402498928,0.0148267243513222,0.0458220750359931,-3.50456135747245  
"Ing3",1075.04294909498,0.0137354419541789,0.125947580836744,0.1090568  
14453492,0.913157427592863,0.946557337756813,0.000754401725229286  
"Wnt16",106.993532530799,-0.354160721076405,0.451806911014414,-0.78387  
6280867925,0.433112708720868,0.57522182376129,-0.195850713052133  
"Fam3c",2120.67103658179,-0.996414691036515,0.209769639762056,-4.75004

243782256,2.03373964548435e-06,4.81871058438007e-05,-9.90477961265902  
"Auts2",1302.06061316833,0.392328368986079,0.191382316335162,2.0499718  
9133716,0.0403671738472377,0.0985820585763329,0.908972257225242  
"Limk1",521.195226838786,-0.815937170425557,0.225383468742927,-3.62021  
746748524,0.000294355513564586,0.00227571126228481,-4.96535516123876  
"Elm",3921.35541978277,-1.51949866411997,0.353530626298373,-4.29806797  
795658,1.72293327791855e-05,0.000255271679732948,-12.5710892541747  
"Pot1a",592.356414588263,-0.142235898789289,0.144844271277732,-0.98199  
1883659368,0.326103846754642,0.470990578075704,-0.107091853127072  
"Hyal5",0.508774917275483,-2.44477546303939,4.54667309538006,-0.537706  
452993851,0.590779723525297,NA,NA  
"Hyal6",1.19635814697524,-0.655602605503425,2.35886035026529,-0.277931  
928199858,0.781064613938983,NA,NA  
"Hyal4",0.353421772999755,1.62409248149331,4.72772323675802,0.34352528  
6942772,0.731203320726435,NA,NA  
"Bcl7b",1729.25462157853,0.190790477361157,0.230045095757149,0.8293612  
02998949,0.406900048169303,0.550800967731538,0.113783959758916  
"Lmod2",0.63666969227087,-0.0721943441908471,3.11301838608549,-0.02319  
11075480762,0.981497831850048,NA,NA  
"Wasl",5007.87221955907,0.365726557824347,0.0967422319601533,3.7804229  
9018887,0.000156562141295828,0.00140610254766746,2.40170200361749  
"Asb15",251.122395179223,0.0370113300905363,0.488500087260021,0.075765  
2476545737,0.939605864978601,0.962511041050371,0.00141419336143104  
"Cul1",3223.19090917486,0.0779768773488573,0.128861403732375,0.6051220  
54318167,0.545097901366811,0.675028191860914,0.030644976993493  
"Ezh2",983.620931160761,-0.335389095627635,0.239433841886652,-1.400758  
94445368,0.16128616952691,0.283005555564767,-0.423357882471483  
"Aass",10680.7306096457,2.23932424726376,0.823986513405589,2.717670994  
40558,0.00657431748192938,0.0245426081299366,8.30194657643279  
"Fezf1",1.2047805377649,-2.66181918488046,1.84498237360348,-1.44273420  
871854,0.14909535875036,NA,NA  
"Ssc4d",144.901041352007,-0.127297895001395,0.325989570688065,-0.39049  
6833173859,0.696169196576586,0.797419964553361,-0.0288169091509785  
"Slc13a1",8009.47278092766,1.76073131449792,0.665604057880173,2.645313  
37159441,0.00816152943354246,0.0289123366452055,6.239128349829  
"Rbm28",3287.63666414289,-0.0723798114724828,0.152033053157024,-0.4760  
79444367448,0.634017780747162,0.748944546771366,-0.0209243039139018  
"Lrwd1",971.743373510739,-0.125428061676697,0.177310674896231,-0.70739  
1485313008,0.479323226810262,0.616724579407845,-0.0606234889029658  
"Cux1",6985.83027809665,0.631235304303598,0.122436681468607,5.15560612  
009441,2.52811815493607e-07,9.28309751128879e-06,7.31432248892536  
"Fscn3",0.783867247402907,0.180646067215266,2.37259971254653,0.0761384  
511091328,0.939308949348298,NA,NA  
"Gcc1",1046.38505268503,-0.198433136585648,0.132711873276886,-1.495217  
6597767,0.1348576461009,0.247013093816378,-0.277471819528986  
"Ephb4",2647.02658948201,-0.28337737227821,0.0954273198905784,-2.96956  
23077662,0.00298224326670108,0.013481979878075,-1.22033668693544  
"Epo",0.946300746917918,-0.0749428933948144,1.94877603825847,-0.038456  
3910493211,0.969323800645105,NA,NA  
"Actl6b",0.284694131055269,-2.13860194741628,4.74578785920475,-0.45063

1593923511,0.652255092040634,NA,NA  
"Gnb2",14705.6235841494,0.0191746966815296,0.140897981133709,0.1360892  
22338347,0.891750747588622,0.932998286997368,0.00132980191815117  
"Gigyf1",5837.66173980481,0.0353217069101849,0.155171054945584,0.22763  
0771232248,0.819933295895312,0.884533551143454,0.00433379095797526  
"Pop7",477.790613865538,-0.0705961292158516,0.242788887804023,-0.29077  
1665270101,0.771225957291646,0.852168407303214,-0.0112933411898643  
"Tfr2",116.298487318087,-2.4472351389775,0.844164304105265,-2.89900334  
221232,0.00374350903806475,0.0159822507607153,-10.1224411952211  
"Pcolce",6326.49084710153,0.0944313677102036,0.249592960832702,0.37834  
1470028474,0.705176942292021,0.804213269037301,0.0205757248372757  
"Gm20605",5081.63924165977,-0.139767517998137,0.143326000723794,-0.975  
172106193666,0.329474896006128,0.474278443877998,-0.104261074922641  
"Agfg2",1565.3099798709,0.0785010472366743,0.204907702024664,0.3831044  
24387256,0.70164233925788,0.801536344671323,0.017366391203266  
"Tsc22d4",3143.42433432684,-0.090671172640707,0.128992701830519,-0.702  
917074795737,0.482107429551916,0.61965264742276,-0.0433948790409548  
"Ppp1r35",1387.03081236632,0.321666495202098,0.207118496398338,1.55305  
538035318,0.120409904622355,0.227077311183545,0.476859237685734  
"Mepce",3251.74984082493,0.290285631700835,0.184193702905364,1.5759802  
1605537,0.115030362684982,0.219222169057939,0.440557676461701  
"Cyp3a13",61.9987575279216,0.102196848130209,0.448085568437314,0.22807  
4402142917,0.819588399808713,0.884451454032746,0.0125485110336655  
"Zkscan1",2368.73845231241,0.367135575490377,0.201197085044119,1.82475  
593724368,0.0680378678672468,0.146861767704592,0.704262770477817  
"Mcm7",1618.97442702059,-0.2377505321033,0.151684534912969,-1.56740126  
631705,0.117020928168219,0.222212120902214,-0.357606008827669  
"Tpk1",2558.51995857858,1.55594647679005,0.367952565907623,4.228660487  
66916,2.35086792312173e-05,0.000326475945619853,12.4898224290306  
"Nobox",4.50377752722681,0.851833083716501,0.745586266219257,1.1425010  
3886168,0.25324581446939,0.393637347777755,0.794185476258827  
"Asns",650.702425333868,-2.00458358308838,0.492240490612541,-4.0723662  
9516985,4.65379156527628e-05,0.000547944613162784,-15.0530923610752  
"Dlx6",22.8702879307437,0.777036675257768,0.595887550417466,1.30399884  
12468,0.192233977457933,0.322174496516656,0.88011988791934  
"Dlx5",3.19219405491388,-3.96664502335026,1.69672932357074,-2.33781839  
462909,0.0193966709695371,0.0561122092824976,-11.4255316868089  
"Dync1i1",19.0886599590407,-0.492258236416652,0.591884261937526,-0.831  
679887559859,0.405589656056653,0.549446752851568,-0.294785601350552  
"Pon3",762.501427469386,-2.58134268297766,0.595073491099982,-4.3378552  
7600314,1.43879841350679e-05,0.000224664873216776,-21.6856036000355  
"Cald1",12978.4344451868,-0.34810341416285,0.306429279573677,-1.135999  
1925287,0.255956902242915,0.396775932575319,-0.321781072954562  
"Akr1b8",1081.33877570829,-1.63653060908222,0.397494071611166,-4.11711  
953954144,3.83637112523381e-05,0.000471636596467899,-12.5346818262481  
"Exoc4",2019.10186856783,0.0413474515463412,0.117050897381504,0.353243  
353714561,0.723906008592643,0.817960092462874,0.00830842845679148  
"Plxna4",542.377611440068,-0.305816862934498,0.220597642965745,-1.3863  
1065510517,0.165652064684697,0.288459762188285,-0.380191424684751  
"1700012A03Rik",0.121527413527064,0,4.78471990595379,0,1,NA,NA

"Calu",6353.79323970805,-0.838435757502815,0.219403782073311,-3.821428  
00629873,0.000132681149222843,0.0012389928388635,-5.61203323410161  
"Ccdc136",313.067475602891,0.283873188534077,0.398445742630192,0.71245  
1303056204,0.476185356298767,0.613780794414845,0.138563450362449  
"Irf5",1582.49433339151,-0.809102233790468,0.313347401694617,-2.582125  
23676519,0.00981939446587209,0.0332913499035948,-2.75293610796669  
"Ahcyl2",7015.40105848257,0.438644948924161,0.222738025498003,1.969331  
22641915,0.0489150675874106,0.114440363309255,0.950851285736308  
"Klhdcl0",3964.32276723431,0.395739260384946,0.113732068174836,3.47957  
499354177,0.00050220978946832,0.00347360286450986,2.24089846745915  
"Hibadh",14471.9978404184,1.02598202968508,0.435276871558004,2.3570791  
2991734,0.0184193214055209,0.0539168186105461,2.99618847042761  
"Gars",3159.81045563577,-0.242672984638391,0.236179229829668,-1.027495  
02914971,0.304187424907963,0.448947574813069,-0.194344455402115  
"Adcyap1r1",278.55197478619,-1.12435900757051,0.416186886092751,-2.701  
57240687286,0.00690124518867657,0.0254956481392192,-4.1255514805417  
"Nt5c3",1711.18068890016,0.558139545335645,0.161470888415632,3.4565954  
9416099,0.00054704534162586,0.00370872394680842,3.12394466008582  
"Fkbp9",4930.26328914173,-0.836956038787247,0.229785045578441,-3.64234  
337652551,0.000270167359577378,0.00213209003980534,-5.14782578668564  
"Tmem209",885.565243081351,-0.321876091181202,0.119459545055281,-2.694  
43593672026,0.00705078793391711,0.0259047038129858,-1.17591980948846  
"Ssmem1",2.0378436794154,0.562854435963412,1.11212101018367,0.50610898  
5271716,0.612780143156761,0.732107060739616,0.175514064545534  
"Avl9",1399.96141889361,-0.0778420576213038,0.145241626751365,-0.53594  
8676439429,0.591994021762807,0.714972279742851,-0.0261169060317113  
"Cep41",192.565720490451,-0.539206720813021,0.176230698953427,-3.05966  
397463768,0.00221585450923012,0.0108255402708516,-2.44036717196209  
"Sspo",168.451884251199,-0.838032260201062,0.507865971489263,-1.650105  
16011463,0.0989214295508535,0.195675158099071,-1.3670814824545  
"Herc6",954.076531871662,-0.279528923221517,0.251190764651871,-1.11281  
528844789,0.265787767898303,0.407616733903639,-0.250857061196677  
"Abcg2",9452.5451263965,1.62051937665169,0.388730559057253,4.168747063  
7291,3.06278645175562e-05,0.00039707977804615,12.6908922517031  
"Herc3",1904.56139696309,0.481033848615056,0.266177486057185,1.8071920  
947954,0.0707323330869478,0.151337543128422,0.908308581891205  
"Tmem176b",42290.4177287123,0.522473118828766,0.403695042081225,1.2942  
2723681517,0.19558694139513,0.326271903883953,0.585182528712552  
"Aoc1",2636.13122307128,-1.10907315911051,0.580802696773165,-1.9095523  
5792175,0.0561908742669646,0.127145139428719,-2.28738133578728  
"Doxl1",1.67672214375798,-3.53489658088358,1.55878618773858,-2.2677238  
2812286,0.0233460445924272,0.0648896903012324,-9.66817730076099  
"Igf2bp3",35.167403325455,-0.545543907852373,0.580109312276893,-0.9404  
15704949034,0.347004369566909,0.491776018385059,-0.387189921526206  
"Malsu1",866.185937560595,0.607422363115232,0.230297281423738,2.637557  
6791877,0.00835054231473367,0.0294156892672905,2.14190919700929  
"Gpnmbl",1010.52292024703,-1.28959921250829,0.350345352520994,-3.680937  
11884194,0.000232378313325613,0.001903744468622807,-8.07796234824089  
"Tra2a",6038.07047701294,-0.08999630570692,0.129688129022822,-0.693944  
051664765,0.48771729620289,0.624475429561593,-0.0423741570599328

"Npy",110.464872407165,-0.00379275874996845,0.653620681217194,-0.00580  
269085565874,0.995370148537298,0.996955214269288,-1.15657542926226e-05  
"Gsdme",237.247533083253,0.476703198863051,0.20487535248066,2.32679623  
532582,0.0199761128831752,0.057393110326336,1.3623371852393  
"Osbpl3",6034.16929710835,0.37498909411703,0.153839409905636,2.4375359  
6264472,0.014787743221755,0.0457378517350538,1.15677725410305  
"Luc7l2",11719.6771867622,0.0624437843126762,0.187105478961315,0.33373  
5733765373,0.738578982392475,0.829396590375423,0.0116805371042695  
"Zc3hav1",2177.93742101017,-0.737429178312016,0.163068682895179,-4.522  
19988056221,6.12002258062737e-06,0.000115965209209983,-6.6827456934386  
"4921507P07Rik",52.1533745498433,-0.381173491568015,0.32363544664419,-  
1.17778659760679,0.238881693027585,0.3769595103672,-0.371879527712353  
"Tmem213",2553.86704697717,1.54487870546415,0.576760648801338,2.678543  
8789467,0.00739430431895848,0.026853212403408,5.58839760872158  
"Svopl",608.988789341264,1.42412770710883,0.320833914705316,4.43883156  
310607,9.04485645646091e-06,0.000158125452649099,12.4641392024741  
"Npvf",0.997636755383997,-2.31108202400547,2.41833073485488,-0.9556517  
60404953,0.339248201725003,NA,NA  
"Nfe2l3",337.545521431581,-2.09895404703211,0.508099482228895,-4.13099  
032855646,3.61203779974476e-05,0.000451747998841715,-16.1669543888582  
"Trim24",2821.23363666658,0.291652657835993,0.142120909038797,2.052144  
6127,0.0401556103775339,0.0981546976999415,0.676987210832335  
"Cbx3",5304.64555474768,-0.0756757119032507,0.0756398885015983,-1.0004  
7360463324,0.317081365224788,0.462288796503808,-0.0583887671709505  
"Ptn",1150.42312882122,-1.07890159903354,0.4988331622869,-2.1628505893  
3795,0.0305526731474216,0.0797584711512152,-2.72827492336251  
"Mtpn",5316.19367530862,-0.385381937782751,0.233684481360371,-1.649155  
0296335,0.0991158782383717,0.195980265073702,-0.628072865373529  
"Slc13a4",156.016995107464,1.23671071556502,0.49008865347357,2.5234428  
6446885,0.0116211943651381,0.0381079797732025,4.04074397123602  
"Hoxa1",70.2267233731325,-0.0216021720950445,0.214702692901275,-0.1006  
14350957291,0.919856604103296,0.950822460202834,-0.0010893526353743  
"Slc23a4",23.6154465064892,-0.220268823039505,0.493434632899973,-0.446  
399195259075,0.655308914019674,0.7652858891684,-0.0589231885233691  
"Stra8",2.72929365161118,-0.948572467330841,1.26074335295185,-0.752391  
408695426,0.451815711621875,0.5924346163553,-0.496591691566107  
"Tcaf2",360.895173364027,-1.14032636824328,0.19991652209584,-5.7040126  
3631731,1.17019396288858e-08,9.05691370597466e-07,-15.8671479258877  
"Epha1",814.249940264688,0.303727735939718,0.245779438280268,1.2357735  
783958,0.216542738781886,0.351868486146964,0.317242949587851  
"Zyx",3501.3725442276,-0.773993196050023,0.160021697943054,-4.83680154  
628443,1.31945043721908e-06,3.42109635969382e-05,-7.95894447483264  
"Fam131b",11.6327580295314,-2.10778063793342,0.681391631933751,-3.0933  
4682017103,0.00197912694367738,0.00991750633457249,-9.72414852376583  
"Clcn1",8.38408723292289,-0.47111709729679,0.540534937333999,-0.871575  
664693223,0.383439911287651,0.528164999763265,-0.300735971134088  
"Casp2",1147.71367221296,-0.34573998779505,0.196041288383406,-1.763608  
01668918,0.077797997074899,0.162793018562608,-0.627613401770017  
"Gstk1",1630.78327118361,0.624160633765615,0.394733520501662,1.5812202  
4441293,0.113827688071814,0.217589437453355,0.951935660960868

"Kel",14.3125908166587,-1.0818102552216,0.831790168483602,-1.300580718  
80531,0.193402010364199,0.323647020064466,-1.22039209759223  
"Llcf1",20.1118298841326,2.04276139682464,0.458535625869101,4.4549676  
8752226,8.39058309076259e-06,0.00014837254732704,18.0085437188137  
"Trpv6",427.847292228935,-0.243649039851006,0.464060517825957,-0.52503  
7210647566,0.599557323593371,0.721348185574697,-0.0795838991656948  
"Ephb6",496.805711951049,-0.322759019661044,0.385268332963098,-0.83775  
1229587715,0.402170434800478,0.546021988714117,-0.195300201985168  
"Ccdc184",59.3461190917117,-2.99256674909105,0.537698760325088,-5.5655  
0799425644,2.61389798915676e-08,1.68760870836352e-06,-39.7777897466714  
"2210010C04Rik",0.877516630454103,2.41604698609079,3.43160425221797,0.  
70405758022045,0.481396915867123,NA,NA  
"Mad2l1",467.427939489217,-0.353144734319126,0.181259395383336,-1.9482  
8374867012,0.0513810206096336,0.118770599889683,-0.752396531910409  
"Ssbp1",2411.50601660748,0.408224538653278,0.14013379753729,2.91310551  
649504,0.00357853659726644,0.0154607371091294,1.70207243890198  
"Prdm5",377.92427358382,0.441248448968957,0.312276327384949,1.41300639  
937725,0.157653842504761,0.278410888611343,0.564205523866767  
"Clec5a",179.243808653602,-0.863236622839158,0.491244187512717,-1.7572  
454693254,0.0788759780837559,0.164501424823732,-1.55800057422526  
"Agk",855.539106245667,-0.1050783470003,0.106510635874652,-0.986552621  
129424,0.323862006606726,0.468759661852717,-0.0796141952325651  
"Qrfprl",0.221314475300897,1.56465187791422,4.7308669841675,0.33073258  
7314448,0.740846485107455,NA,NA  
"Mrps33",2470.67013219115,0.542933329282497,0.267114955008688,2.032583  
04749294,0.0420946656527989,0.101844123451827,1.24022903026137  
"Hpgds",857.447516882047,-0.990260496000811,0.434981729003794,-2.27655  
65309346,0.0228127211777513,0.063707023420767,-2.72664312549158  
"Smarcad1",1216.55300987562,0.148779901322121,0.120738359634248,1.2322  
5047758491,0.217855532648947,0.353188694939162,0.154843101607111  
"Mkrn1",4442.61681274356,0.460047062228473,0.173208350552255,2.6560328  
1112986,0.00790659210847648,0.0282452449308553,1.64090973500666  
"Rab19",230.767376480502,-0.22493993732908,0.193378599395236,-1.163210  
08649637,0.244744275164555,0.383880932922411,-0.215362634749652  
"Slc37a3",1723.66651253173,0.234447619062486,0.113470866351057,2.06614  
81365371,0.0388144942135226,0.0958082443354487,0.549874979019417  
"Tbxas1",689.411922646351,-0.311576423170247,0.364626759965965,-0.8545  
07834804363,0.392823670183439,0.537342214202097,-0.193526384429168  
"Gfpt1",2227.64674708839,-0.588674225011138,0.171673321615757,-3.42903  
731034413,0.000605726252433193,0.00399215263776492,-3.25149774605629  
"Nfu1",1873.56651991622,0.00354654470266274,0.241822377151158,0.014665  
9078636295,0.988298718016177,0.992279228099683,2.74883152682519e-05  
"Anxa4",5021.63960332026,-0.158261079598282,0.116883773208161,-1.35400  
385574849,0.175735147594522,0.302101846822939,-0.189437100166921  
"Pcyox1",4679.73922114298,-0.515145131647161,0.300120804208339,-1.7164  
5925381953,0.086078019499767,0.175798598953227,-0.895536674821505  
"Tgfa",500.911141289832,-1.33725150455646,0.276631071554678,-4.8340611  
0904698,1.3377549133986e-06,3.44293125023463e-05,-13.742401818931  
"Add2",62.8056379590614,-1.50401793057699,0.286890078278853,-5.2424884  
8060582,1.58425285489685e-07,6.47584112469157e-06,-17.969152035654

"Dusp11",8155.73747932398,0.539164595734936,0.189366795822027,2.847197  
12024731,0.00441060422798581,0.0180376590288519,2.16490411736301  
"Nat8",4495.69550245511,2.31384603403284,0.802706830661765,2.882554309  
55442,0.00394465129845898,0.0166369913513635,9.47780644599083  
"Cct7",7126.92892531395,0.0321054504832112,0.134847803089163,0.2380865  
66838488,0.811813953318285,0.880059405192923,0.00410198074489882  
"Pradc1",368.582422662147,0.370702650739018,0.168536317731998,2.199541  
65207584,0.0278394308390782,0.0742562547880091,0.963913363978376  
"Zfp638",3133.02458951561,0.297112720253826,0.162533190807403,1.828012  
5971679,0.0675476610785744,0.1460137800122,0.571661000477088  
"Reg3g",49.6492572990801,-3.06170328260984,1.00341892410467,-3.0512712  
1789309,0.00227874634240316,0.0110469905977565,-13.7948018359604  
"Fbxl14",1674.78187352123,0.0868760595280814,0.120560741598707,0.72059  
9909855007,0.471155709330174,0.609093179960848,0.0430717618707842  
"Prickle2",321.185940157078,-0.937831466650905,0.134625719981369,-6.96  
621319299677,3.25585643031981e-12,1.67059707048357e-09,-18.95365341958  
66  
"Adamts9",1331.44232239915,-0.261303916367595,0.242274522363267,-1.078  
54475913813,0.280790718394901,0.424637976209088,-0.223811584596742  
"Lrig1",1062.2571922926,-0.211309772235443,0.272794068712029,-0.774612  
781110388,0.438568502617395,0.580648378083383,-0.114870085542625  
"1700003E16Rik",71.9004131480886,0.608443455333832,0.219026881586399,2  
.77793963429015,0.00547047802485031,0.0212623484391234,2.3430046747539  
6  
"Kbtbd8",143.951112740514,0.405957675503725,0.229867676117614,1.766049  
41747448,0.0773875585265771,0.162038511184622,0.738810999697573  
"Wdr54",156.287816808545,0.0453697643653657,0.236431513953343,0.191893  
896066321,0.847825318825956,0.902791705035749,0.00463966736491159  
"Ino80b",1176.48793758561,0.342925188214094,0.114988589623082,2.982254  
0596259,0.00286134442024372,0.0130382083444525,1.48825112367594  
"Wbp1",3141.96316002408,0.179945253368473,0.146023061518012,1.23230708  
559193,0.217834393988943,0.353188694939162,0.187278529582604  
"Mogs",1662.32585829021,-0.305299501435292,0.125524284082522,-2.432194  
7236487,0.0150076366062761,0.0462054158454398,-0.938691634372702  
"Mrpl53",1704.89056431752,0.0261814142868006,0.286536860942357,0.09137  
18891199395,0.927197097525462,0.955393000028413,0.00119472351304783  
"M1ap",12.1658432086878,-2.13936497960064,0.883878914660284,-2.4204276  
6731561,0.0155022630916468,0.0473025235932598,-6.52761252351801  
"Pole4",1802.02790359453,0.071775883072946,0.193584581228463,0.3707727  
26926213,0.710806816519932,0.807944418794408,0.0153070691975836  
"Tacr1",10.7890624287993,-2.27968216480962,0.895704536736601,-2.545127  
40676227,0.0109237873039367,0.0363095814613293,-7.55868201684186  
"Mrpl19",1365.58497076283,0.470367754468441,0.161368724928247,2.914863  
17858427,0.00355844509265847,0.0154012347206781,1.96298932268794  
"Bmp10",1.51654787900059,-4.43626249632237,1.80656687249243,-2.4556314  
874754,0.0140637292810528,0.0441072210908745,-13.8461598012569  
"Arhgap25",670.799839499429,-1.22009762352315,0.254338066065288,-4.797  
14909529098,1.60939809405213e-06,3.98247320908244e-05,-12.360836389911  
5  
"Gkn3",18.4228405517841,-0.205437532877511,0.54366336803585,-0.3778763



56870828,0.70552244697253,0.804366546080598,-0.0447237941746507  
"Gkn1",0.0910336030428901,0,4.78471990596623,0,1,NA,NA  
"Aplf",373.32362984466,-0.450256952601134,0.173575721089741,-2.5940088  
2666272,0.00948640514427342,0.0324739565506512,-1.54317323948514  
"Gp9",6.29570554397786,0.265618672998817,0.60869326038704,0.4363752488  
89601,0.662564493844256,0.771126514712308,0.0690350440602944  
"Rab43",2951.59647478464,-0.16573417253517,0.251062157414345,-0.660132  
033604919,0.509169103425173,0.643449295390759,-0.0730741937827836  
"Isy1",1708.45325649918,-0.921964668257914,0.157966361364876,-5.836462  
01819086,5.33209103484368e-09,4.9983226441049e-07,-13.3767791632313  
"Cnbp",14080.181400974,-0.173243232011321,0.145971431173119,-1.1868297  
1468477,0.235294795467692,0.373202466609375,-0.170754454506856  
"Cpg1",5676.2060857048,-0.101178078967099,0.0852134845757118,-1.18734  
821690342,0.235090296515394,0.373036775227565,-0.099769505180581  
"Tmf1",2480.58121330425,0.421288707923573,0.106235733998004,3.96560264  
67656,7.32107375047995e-05,0.000776698269304374,3.01662035628794  
"Hmcsc",1229.9836476763,0.264308030469824,0.13570796143064,1.947623615  
32423,0.0514600159429148,0.118882392281393,0.562875819751618  
"Uba3",2277.28882795894,-0.100047833124355,0.160289174203918,-0.624170  
868814105,0.532515376043582,0.664724895777591,-0.0408577356356672  
"Rpn1",10040.3734939207,0.168955123315305,0.115364533373982,1.46453262  
86511,0.143048474662302,0.258590687832891,0.228513295012123  
"Frm4b",2515.16295956815,0.326899447592975,0.195230644299754,1.674426  
92598534,0.0940467246571952,0.188325258022593,0.545786321101762  
"Foxp1",3455.66490485151,0.257061575161477,0.28255736861995,0.90976772  
7583964,0.362945017646395,0.507872969288748,0.174165366889177  
"Gm20696",19.7809907888114,-0.23854796317112,0.628379899335754,-0.3796  
23796724375,0.70422469371741,0.80365361648451,-0.052143466427108  
"Prok2",4.10349549887496,-0.956511807454034,2.12590181672831,-0.449932  
259301642,0.652759286016712,0.763578694975694,-0.258008622876467  
"Gxylt2",1374.11640670903,-1.02567001322782,0.452641941641749,-2.26596  
326780429,0.0234536323373603,0.0650774047692971,-2.80231291716387  
"Cntn3",21.6172632546281,0.307209102873207,0.599700582146604,0.5122708  
09832407,0.608461491538007,0.728552688340024,0.0972916886871777  
"Chl1",77.1543648696666,-1.43289249206756,0.389692503378564,-3.6769824  
4037193,0.00023600927982228,0.00192519681799471,-8.95948567835756  
"Ruvbl1",1034.1190386212,-0.354012392274048,0.139504596614608,-2.53763  
962525217,0.0111602839794104,0.0369382476711158,-1.16771261685742  
"Sec61a1",6484.41308205509,-0.178919335661792,0.100101866791526,-1.787  
37261747988,0.0738772842820179,0.156571661840303,-0.331759652089652  
"Abtb1",2355.23010162549,0.310048492726545,0.140036764682572,2.2140506  
7040321,0.0268252934863364,0.0723029544369073,0.814463374064458  
"Plxna1",2303.75821476129,-0.822659914176267,0.14206132916033,-5.79087  
862290672,7.00191652606518e-09,6.01526044014989e-07,-11.7836127913483  
"Chchd6",974.081520939509,-0.0292339228823427,0.406157239969773,-0.071  
9768602044823,0.942620322959827,0.964484207444937,-0.001057151874597  
"Klf15",2664.77954226608,1.64759139873091,0.402087055957361,4.09759870  
237064,4.17458182475691e-05,0.000503999977827308,12.5100532996398  
"Aldh1l1",13399.5455002929,1.25649788900713,0.372712922215114,3.371221  
69400376,0.000748356089991437,0.00470168049780502,6.73462171656583

"Slc41a3",342.695708759958,-0.550591935372894,0.273531781120646,-2.012  
8993169172,0.0441252224587481,0.105720519476612,-1.23715600445652  
"Nup210",1533.76065015392,-0.158092592595337,0.344156147605462,-0.4593  
62977227923,0.645973530045444,0.758518030040715,-0.0436950076999227  
"Cntn6",17.1634858526048,-1.15244833405237,0.501221577618676,-2.299279  
17215317,0.0214890917463776,0.0608296037849695,-3.22648505848122  
"Wnt7a",58.0304124179455,-0.911564009042265,0.847082124751951,-1.07612  
235272843,0.281872540032285,0.425778647780406,-0.778325869967329  
"Xpc",1692.28056854163,0.169050925190358,0.0995178529688339,1.69869948  
101975,0.0893758212865996,0.181076217700908,0.288880517111563  
"Tmem43",2460.99606170488,-1.00046436938078,0.214826040195672,-4.65709  
077200099,3.20709065263683e-06,6.99461449050479e-05,-9.57222795690453  
"Slc6a6",12784.6265324621,0.616470979460321,0.194026237045035,3.177255  
76112282,0.00148675858399866,0.00798590051537354,2.97760274772476  
"Grip2",422.294369451132,-0.0366751900000739,0.361660960672825,-0.1014  
07655202387,0.919226859830043,0.950561510035433,-0.00185952036622751  
"Sumf1",2522.02295201765,0.0773790001809531,0.240597121121699,0.321612  
327779322,0.747746403440426,0.835944176232897,0.013865809455847  
"Itpr1",8441.55117351603,0.570185352055292,0.17373361459705,3.28195181  
673825,0.00103091219347429,0.00601818142166518,2.9153406877195  
"Bhlhe40",3910.68210987825,0.131301393516903,0.246866373882865,0.53187  
233016678,0.5948144225709,0.717545728595398,0.0435813747332488  
"Edem1",3737.39456540132,0.285423984129226,0.153893141467064,1.8546894  
384524,0.0636405878251242,0.139516998135178,0.562162183820397  
"Arl8b",3987.08093167853,-0.0415717584993565,0.174876745278321,-0.2377  
20335160595,0.812098010553112,0.880220524196152,-0.00530384165068137  
"Usp18",511.082613434479,-0.994348808326776,0.210704501744145,-4.71916  
261919356,2.36817454282981e-06,5.43231379248184e-05,-9.76506244034419  
"Slc6a13",3139.17700700762,1.91960956969578,0.563717797544758,3.405266  
92266332,0.000660994113763219,0.00427606610157772,10.4709362195169  
"Slc6a12",67.3718505501826,0.57140571655077,0.679852569996737,0.840484  
748852994,0.400636649178034,0.544780904224375,0.347055590450739  
"Ret",67.3885648365398,-1.45699172215106,0.30110130512526,-4.838875479  
28409,1.30575819669716e-06,3.39010297193093e-05,-14.9954537548367  
"A2m",23.5512537025639,1.50455734543776,0.693891202119446,2.1682899867  
3306,0.0301366298144975,0.0789578081326353,3.81983284356201  
"Klrg1",46.6429809421954,-1.71608231260179,0.450771190088064,-3.806991  
99579842,0.000140667296201519,0.00129720639021244,-11.4077296901714  
"Mfap5",691.132599852387,-1.89433022767858,0.417870174178475,-4.533298  
48535565,5.80696649477466e-06,0.000111004149720702,-17.2496630242854  
"Gdf3",21.5038236545251,-2.39030655493426,0.653105518096669,-3.6599086  
8045378,0.000252305148093168,0.00202363051317178,-14.8267419298182  
"Mlf2",7373.78585069024,-0.297518579159026,0.304094883973241,-0.978374  
168192869,0.327889299431954,0.472624052659439,-0.222976793049935  
"Ptms",36077.6099360388,0.464453540850832,0.166051970795242,2.79703720  
845053,0.00515735934913397,0.0203517896355827,1.8088544567177  
"Plxnd1",4919.4666752035,-0.708844819527664,0.157673055365095,-4.49566  
235579264,6.93537153541043e-06,0.000127091987027662,-6.35876293145098  
"Lag3",343.251011170904,-1.59857168589473,0.365847549683673,-4.3695022  
3467924,1.24530065851101e-05,0.000201163430006141,-13.6060716905464

"Lrrc23",66.2639391779123,-0.582152542039764,0.374778258856736,-1.5533  
25275099,0.12034544489754,0.226977702129255,-0.863276039115491  
"Tmcc1",2377.56561533265,-0.053518827974516,0.269254966106646,-0.19876  
6354241795,0.842445516232372,0.89912212547838,-0.00569099991759223  
"Cops7a",2845.23945350239,-0.0890710612140592,0.208753730857015,-0.426  
680092606672,0.669612352284794,0.776320632881409,-0.0225518714760875  
"Mug2",2.48558288568834,1.0244533884309,1.31517895416598,0.77894600212  
8324,0.436011523895009,0.578165988364042,0.56129214594866  
"Rasgef1a",155.892498115369,-0.358031488664253,0.2990110703791,-1.1973  
8539516388,0.231156373531959,0.368075702011118,-0.35784053256343  
"Tuba8",191.558213924835,-3.00819201144246,0.776372009882398,-3.874678  
5988564,0.000106765516928146,0.00104242065551577,-20.6548772195825  
"Bms1",2167.85240881204,0.0735559332112662,0.112762750583361,0.6523070  
14778688,0.514203135684992,0.647901830040152,0.0319244585991426  
"Clec4e",27.0288013168851,-1.65904790222453,1.07302326778568,-1.546143  
45469711,0.122069926090625,0.229608278884335,-2.4410908270093  
"Clec4d",137.159343425927,-1.06895301260579,0.42518908024451,-2.514065  
06486732,0.0119348412845603,0.038847244341843,-3.47208566613113  
"Zfp248",170.523657159584,-0.543146141970482,0.215029814802696,-2.5259  
1084854375,0.0115398761265152,0.0379165835689419,-1.77737334898348  
"Clec4b1",164.89248293536,-0.924109324571218,0.355323121135953,-2.6007  
5764734049,0.00930181410733218,0.0320040182574136,-3.18068616725926  
"Clec4a2",426.855900510388,-1.18798674709918,0.41533159835496,-2.86033  
316945916,0.00423196150731687,0.0174967738485293,-4.8062840368988  
"Klrrk1",328.073603630314,-1.17641551716852,0.304580129078648,-3.862417  
16006612,0.000112270641183528,0.0010869180545166,-8.02834071429418  
"Klrb1f",21.7180461783906,-1.04836141067486,0.511903822522772,-2.04796  
558366825,0.040563371791876,0.0989744241268925,-2.424748611497  
"Clec2e",21.0210238211081,-0.379387457998929,0.513885838663328,-0.7382  
71867903106,0.460349258091281,0.59977775838176,-0.193941387051031  
"Cd69",124.102394075871,-1.02242933662896,0.504918435405158,-2.0249396  
0397492,0.0428735662827006,0.103382240338869,-2.32022147758051  
"Clec2d",5277.14314181273,-0.17714140934545,0.302046758168229,-0.58647  
015587828,0.557559611226611,0.686666075018725,-0.0665887254322714  
"Clec12b",40.3324103190192,0.288885849402551,0.353131358919606,0.81806  
908988878,0.413317737561734,0.556859400703336,0.169126051969039  
"Clec1b",24.8498025859579,-0.563711421128334,0.398391752388307,-1.4149  
67598473,0.157077996345929,0.277746147887271,-0.722141230521474  
"Tmem52b",4992.16504007704,1.73317980089802,0.635944427591863,2.725363  
6099322,0.00642307077017791,0.0240886774142968,6.45785110333884  
"Gabarapl1",20604.5388603581,1.08891674756313,0.31242154847311,3.48540  
858620337,0.000491386088983015,0.00341205340562352,6.18552733537598  
"Olr1",49.8888609081409,-2.00814128624407,0.582186650679983,-3.4493083  
6854229,0.000562024484391396,0.0037787425505736,-11.2021430245058  
"Klrd1",193.536343956013,-1.15528523390131,0.347503380606553,-3.324529  
4819429,0.000885678686671503,0.00536803327097326,-6.03901520328492  
"Rad52",796.968539121582,-0.0664596877715088,0.201241475037486,-0.3302  
48462744218,0.741212231031303,0.831491633430087,-0.0122640748424554  
"Klrc1",47.0486901405719,-0.894027197997019,0.365964568364912,-2.44293  
375719795,0.0145684110581115,0.0452984237485801,-2.76655200412503

"Adipor2",7503.57168781239,-1.84529380244352,0.599244365862552,-3.0793  
677964538,0.00207440414245816,0.0102656680126013,-8.44950834069276  
"Wnt5b",237.684547597,0.613057554164368,0.370812872924283,1.6532801284  
1008,0.098273865309422,0.194695293446214,1.00315805518268  
"Erc1",1182.14638964028,0.341598165200791,0.24189185031338,1.412193774  
85532,0.157892912967558,0.278732097513939,0.436393084756307  
"Klra5",6.22928389308405,-0.128707093000626,0.762901296418752,-0.16870  
7398460074,0.866026799072267,0.915814650629735,-0.0113186666653266  
"Ccdc77",570.331270002793,0.0165383515882789,0.185913056914386,0.08895  
74506641287,0.929115725452378,0.956286867339024,0.000739220332325367  
"Klra13-  
ps",27.5984818733762,-1.01271058621237,0.514141696003497,-1.9697110623  
0894,0.0488714944351831,0.114405914262483,-2.19555908600061  
"Kdm5a",5371.18955729097,0.752953877215732,0.299845268844233,2.5111414  
3010502,0.0120341472756818,0.0390548940714453,2.44166910653911  
"Klra2",328.462418289488,-1.27443184423843,0.510974845994655,-2.494118  
55442246,0.0126270362184815,0.0404258080326176,-4.08874297205392  
"Magohb",345.537494933776,-0.23508885728956,0.142590355490877,-1.64870  
096915217,0.0992089115200353,0.196104557666023,-0.382984974619278  
"Ybx3",5544.1614776562,-0.735346939636095,0.18659019552498,-3.94097309  
114855,8.11517303722029e-05,0.000840752624228062,-5.20714837174132  
"Etv6",2691.81036245704,0.170288658510257,0.151759213117558,1.12209766  
387195,0.261820917066163,0.403364747231041,0.154607465003326  
"Bcl2l14",279.867454853694,-1.21467248935109,0.327046622146652,-3.7140  
6523442523,0.000203956181570125,0.00172153144080273,-7.73083287431165  
"Lrp6",5306.6200420905,0.548791284088662,0.113585111075738,4.831542434  
48979,1.35479334415942e-06,3.47643328492193e-05,5.63439545030337  
"Dusp16",1489.34051734622,-0.579125597157941,0.195693774517911,-2.9593  
4604248197,0.00308292703543084,0.0137932334412186,-2.48072916767855  
"Ddx47",3042.387951992,0.0371336977416399,0.0938024696039718,0.3958712  
16380721,0.692200036096131,0.794426764600763,0.00854574404299641  
"Gprc5d",3.6996650270617,1.11992722535885,0.790334071130459,1.41703017  
276853,0.156474106055481,0.277004913734317,1.43767301563497  
"Gsg1",5.04070170269502,-0.951601902896544,0.738954127721476,-1.287768  
57344414,0.197826534944993,0.328861947170047,-1.05829287206846  
"Fam234b",1430.79671932382,0.45258757165844,0.246832903433911,1.833578  
77074772,0.066716545895942,0.144634112950753,0.875099832274915  
"Emp1",3773.84310978949,-1.32139714046824,0.225429107236251,-5.8616970  
8370185,4.58160259363445e-09,4.53462372440023e-07,-19.3007938034633  
"Grin2b",10.9761660903484,-2.1742325695723,1.62604627310855,-1.3371283  
4962302,0.181180744776237,0.309015234573747,-2.5533419803224  
"Atf7ip",2610.07767872549,-0.452067545273205,0.174064592048112,-2.5971  
2523928043,0.0094007640985057,0.0322704398578634,-1.55222077008834  
"Plbd1",2289.39311144113,-1.71623226020896,0.294279714056449,-5.831976  
10379542,5.47747648803591e-09,5.06767814185337e-07,-24.8771519948959  
"Wbp11",2102.31367351266,-0.0989804792122371,0.102702052256161,-0.9637  
63401391028,0.335164559472308,0.479788011737684,-0.0726923442901549  
"Art4",1221.01394569502,-1.27418393066015,0.406644190172579,-3.1334123  
5766675,0.00172786510670386,0.00895561588021094,-6.00838179616308  
"Mgp",29215.5137789105,-1.5063901427201,0.425913687937663,-3.536843697

16846,0.000404939237364446,0.00292064084352835,-8.79122089732162  
"Erp27",17.0269267557212,-0.580619553691017,0.671308112411933,-0.86490  
7697308942,0.387089452471049,0.531413598981819,-0.367076190896233  
"Arhgdib",1607.62770091916,-1.56165616583056,0.42904030416086,-3.63988  
219914428,0.000272762798642563,0.00214275948748295,-9.59740908217536  
"Rerg",508.892974913567,-1.02109116468682,0.468259047282276,-2.1806117  
1612834,0.0292121478154636,0.0770637881350167,-2.61718100637096  
"Ptpro",1618.56518737906,-0.516690159905696,0.45023348287385,-1.147604  
91958006,0.251131697962456,0.3910995085361,-0.485065236445492  
"Strap",4921.77181212282,0.0681913173461419,0.166013261429039,0.410758  
253642825,0.68124980698669,0.785512048292518,0.016462712580869  
"Dera",1847.29644671412,1.10820193590804,0.228204094786525,4.856187777  
63264,1.19667227518971e-06,3.17020598120229e-05,11.4800067022926  
"Lmo3",3.94396818468213,-4.3767451913116,1.97355753781114,-2.217693230  
35082,0.0265757561485259,0.0718190011620177,-11.5266232620272  
"Pik3c2g",111.986373056779,2.23069008070828,0.961026027517604,2.321154  
70011806,0.0202784960578757,0.0580897180761463,6.34802332710986  
"Plcz1",1.17475240967519,-1.70147846644247,1.7790389597161,-0.95640315  
078541,0.338868593502183,NA,NA  
"Plekha5",2034.36631948686,-0.116392837948057,0.188657645655926,-0.616  
95266864686,0.537265945495854,0.668727188335663,-0.046834044478366  
"Aebp2",3440.23185932002,-0.141643262506846,0.121305577496694,-1.16765  
663566217,0.24294529521441,0.381765583985378,-0.1363951690396  
"Slco1c1",9.6037448082628,-0.436555989181716,0.53596893804621,-0.81451  
7331495203,0.415348647569008,0.558684432397304,-0.254150012772299  
"Slco1b2",11.4013691499961,0.952392552207329,0.650836896164272,1.46333  
521934648,0.143375675131227,0.258990079091037,1.28664950209317  
"Slco1a4",130.876518020304,-0.0732140620233716,0.371560905384487,-0.19  
7044578593678,0.843792652900935,0.899917269871446,-0.00772060164726149  
"Recql",791.390781490926,-0.185466882449726,0.100356853404948,-1.84807  
39098241,0.0645916514937922,0.141105959511171,-0.363189444054882  
"Gys2",624.416285536203,0.0838486711834584,0.750856884231111,0.1116706  
43160342,0.911084557067771,0.945280083387515,0.00471850103315697  
"Golt1b",1133.34843362395,-0.562481655497198,0.157422511025038,-3.5730  
7002559332,0.000352820361636464,0.00262225187696904,-3.34323449775527  
"Ldhd",43878.9137991235,0.834842427384018,0.244900035902488,3.40891100  
447379,0.000652227535004217,0.00423752590333112,4.56139176257133  
"Kcnj8",446.408099028814,-0.571705502243779,0.358549063925484,-1.59449  
72662447,0.110824702552622,0.213060545293929,-0.883958986560139  
"Abcc9",811.123484546399,-0.608127614455424,0.432718876713745,-1.40536  
419181388,0.15991300904358,0.281203449705242,-0.771517427108838  
"Rad18",134.822993552507,-0.881264389620498,0.249729327074993,-3.52887  
824566899,0.000417325086026498,0.00299705507452842,-5.12025636244038  
"Sspn",730.559610062723,-1.68640040396564,0.388831332410471,-4.3371000  
8273043,1.44374895346937e-05,0.000225021719382461,-14.1646058983792  
"Bhlhe41",533.260530556119,-0.056396243233358,0.186040383648179,-0.303  
139792164742,0.76178333020091,0.845664505366508,-0.00945384684130622  
"Srgap3",928.347918536354,0.193743155640416,0.22484351607111,0.8616799  
76482586,0.388863647249434,0.533047201495323,0.121892595891629  
"Rassf8",1755.95636027763,-0.0400073321833684,0.158911538652515,-0.251

758509939612,0.801227728766539,0.873097762001341,-0.00542930485196975  
"Lrmp",681.953423019776,-1.10967367811261,0.403021986422624,-2.7533824  
8407361,0.00589829415431207,0.0225323157172368,-4.20877559296635  
"Thumpd3",1286.07843663246,-0.0237640780519637,0.129894486726426,-0.18  
2949089302103,0.854837965150243,0.907625280140461,-0.00230330172145195  
"Kras",2805.01447369012,0.0195263481751562,0.157911663609165,0.1236536  
15754973,0.901589538967684,0.939775885413669,0.00121285669903715  
"Bcat1",1382.52853681,1.62705235410015,0.468302053477471,3.47436519233  
291,0.000512063594253015,0.0035279915055637,9.18800783950145  
"Mtmr14",1281.73674088459,0.311260014503806,0.123232116717308,2.525802  
71113763,0.0115434285680066,0.0379167402660027,1.01855562060762  
"Cpne9",6.83655541309183,-0.0917132843686834,1.11530693594936,-0.08223  
14301225212,0.934462680449475,0.959053301443094,-0.00383440635134532  
"Ogg1",531.443803281239,-0.121605790138836,0.156334320503851,-0.777857  
285251963,0.436653152200487,0.578583972925933,-0.0665392331265513  
"Camk1",3609.91771718411,-0.236215269099492,0.155338534061744,-1.52064  
824434098,0.128348133110062,0.237967754985774,-0.33911538771286  
"Etnk1",8039.62807844335,0.103398129172345,0.13905350260973,0.74358521  
8867474,0.457127448242311,0.597110670987377,0.0533175352600304  
"Ttl13",463.626499405508,-0.230794012898923,0.335295493119401,-0.68833  
0197199328,0.491244869746501,0.627673163192482,-0.107489008560676  
"Cidec",6712.01139129208,-3.6981749904684,1.60321982613458,-2.30671735  
103528,0.0210705823273824,0.059905834677647,-10.4102937072042  
"C2cd5",1849.97245954802,0.0903620372020309,0.153325807095841,0.589346  
561505769,0.555628816349912,0.684937134803729,0.034195544798205  
"Il17rc",1634.38075929461,-0.432778936086876,0.216830720901207,-1.9959  
2997840956,0.0459415450665999,0.108868284602402,-0.959737720596907  
"Cmas",2242.30925261271,-0.00378590815282132,0.148942064278502,-0.0254  
186630966935,0.979721024918548,0.98690848025738,-4.9890580341842e-05  
"St8sia1",2532.09150963493,1.89661359892379,0.651141256276749,2.912752  
92517741,0.00358257940732467,0.0154713473497268,7.90653738322274  
"Creld1",2421.79477379296,-0.409336666609007,0.282894348966498,-1.4469  
5950309521,0.147908266094772,0.265090116032343,-0.543470336532708  
"Emc3",3420.39810661107,-0.0912631023647639,0.204725066749766,-0.44578  
3722597654,0.655753480838678,0.765529958651212,-0.0243843080147778  
"Itrp2",4497.83572783605,0.65335092686598,0.183276499687606,3.56483743  
403881,0.000364081779845184,0.00268998353293725,3.86667465762199  
"Med21",2195.83856117141,0.885285418934596,0.166514948584299,5.3165522  
1624993,1.0575188495925e-07,4.75103744916003e-06,10.8510740067693  
"Smco2",0.504347048388131,2.53068533297104,4.66855537053199,0.54207032  
6282253,0.587770059718515,NA,NA  
"Sec13",2958.24428064941,-0.0655444467564621,0.146452511787231,-0.4475  
47440167405,0.65447984291844,0.764684083007176,-0.0175850830775086  
"Ccdc91",2002.26819530788,0.235685977845199,0.254073556514025,0.927628  
916125278,0.353600092869331,0.498553374124391,0.164047958268441  
"Atp2b2",165.463984826387,1.23101958922261,0.452067197376587,2.7230898  
3347254,0.00646744690326407,0.0242271430777796,4.5797396003626  
"Far2",5.63000469099731,-0.167517168129647,0.94380855450538,-0.1774906  
22785717,0.859123030233129,0.910835780734357,-0.0156448740298328  
"Ergic2",3414.44450737488,0.584846464412602,0.196164079132804,2.981414

67590841,0.00286919987947483,0.0130648433559085,2.53696475492834  
"Tmtc1",830.550455759104,-0.533195470112506,0.179576496403142,-2.96918  
294315925,0.00298592771045703,0.0134923797215507,-2.29574252820564  
"Slc6a11",0.10500178835157,-0.544048378937457,4.78471990596623,-0.1137  
05376621746,0.90947135024012,NA,NA  
"Caprin2",917.828330145481,0.609726788011425,0.2772992809836,2.1988040  
7135814,0.0278918568901906,0.0743655716730393,1.58453492326381  
"Slc6a1",5.13015553761901,-3.28287956593514,1.32653652390151,-2.474775  
10553556,0.0133320098091497,0.0422678906111872,-10.3861365864481  
"Dennd5b",1863.99401829286,0.694833680796209,0.206606543305238,3.36307  
684006731,0.000770789059197769,0.00481231030299011,3.70803413300186  
"Atg7",944.679508376997,-0.0651188799406058,0.16620532092703,-0.391797  
805132816,0.695207616927646,0.796940332462534,-0.0147803882606171  
"Vgll4",1621.91185698981,-0.937149991820619,0.223182938187692,-4.19902  
166102186,2.68070678917901e-05,0.000357268769483338,-7.43818029331755  
"Tamm41",501.133053883564,0.272990225250541,0.118190581256251,2.309746  
02501248,0.0209022191005254,0.0594878803126616,0.770373687303298  
"Timp4",284.839708180507,-3.63744468804624,1.17905477588685,-3.0850514  
8567865,0.0020351691989794,0.0101228900616583,-16.7066236835405  
"Cand2",343.258388133205,-0.382098611530815,0.252364452163069,-1.51407  
461810001,0.130006915370875,0.240067699204596,-0.545191410798129  
"Efcab12",138.085234484464,1.0412338812049,0.317335576144314,3.2811760  
1517006,0.00103375211040349,0.00603119574607334,5.3215485203091  
"Mbd4",514.725327252165,0.192062113317007,0.220005047338759,0.87298957  
746762,0.382668758671775,0.5274477206689,0.122863195277923  
"Ift122",1628.17375039422,0.924529625896094,0.21320032209956,4.3364363  
4677231,1.44811336909459e-05,0.000225341695695181,7.76410055945464  
"Rho",74.6814070649869,0.645596231974993,0.50111885597801,1.2883095981  
5913,0.197638213319727,0.328660970857828,0.718373354729966  
"Klrb1c",44.0329145577076,-0.605901708255266,0.304323040307081,-1.9909  
8204212167,0.0464828615504152,0.109950604696105,-1.33766378067916  
"Necap1",1464.80349283871,-0.106014738680503,0.230368920520959,-0.4601  
95491825721,0.64537590657418,0.758044543758034,-0.0293674746107122  
"Pianp",168.224874561783,-1.74093718644737,0.463505041073807,-3.756026  
43374518,0.000172632467708311,0.00151076654191052,-11.3076274725789  
"Ing4",3229.51706950209,-0.18570450602899,0.127960469077582,-1.4512646  
551522,0.146706179295197,0.263444196343503,-0.247713786974393  
"Mrpl51",4064.8137100276,0.807364690428326,0.234851672267824,3.4377642  
8173614,0.000586538042247182,0.00389520393315244,4.47926676525311  
"Cd27",169.66188215557,-1.40070623406219,0.494453196922788,-2.83283886  
681173,0.00461366360757019,0.0186404832747525,-5.57819988095655  
"Vamp1",1141.70241438675,0.234511894015861,0.183142900614024,1.2804858  
5683427,0.200374315685786,0.331908793411048,0.258642010933739  
"Ltbr",3513.88626297391,0.0269153593324206,0.0817424536139222,0.329270  
264623381,0.741951417503761,0.831876263309317,0.00495435248186943  
"Scnn1a",3050.57373883053,1.44953219867124,0.465609168203266,3.1131951  
3802707,0.00185073605093137,0.0094071041504327,6.76393776925851  
"Tnfrsf1a",4047.4092603625,-0.944335863918164,0.1392512704916,-6.78152  
422297024,1.18914534313449e-11,4.65112049330873e-09,-18.1181767880808  
"Cd9",7420.60628504957,-0.302998567449486,0.193269044779885,-1.5677552

9053073,0.116938252682283,0.222141665120729,-0.45584315555847  
"Akap3",5.78316683032388,0.4201728649666,0.906808544206858,0.463353447  
263893,0.643111041255922,0.756249869272539,0.117389341459397  
"Dyrk4",7.48934578754865,-1.19780640267536,1.05902084234384,-1.1310508  
2995757,0.258033697971083,0.398980257180029,-1.10059644058064  
"Rad51ap1",109.20055290251,-0.922410280163671,0.433990418444528,-2.125  
41623262029,0.0335518969831495,0.0856500245322661,-2.26681013556306  
"D6Wsu163e",613.575195101533,0.249018737914906,0.13444914650802,1.8521  
4071180475,0.0640056197246347,0.140033839025014,0.489538759713049  
"Prmt8",1.64637905634584,-4.56346839511205,3.25508018236971,-1.4019526  
8301803,0.160929376820654,0.282532053777157,-5.76805643584068  
"Tspan11",100.447762846237,-2.08004680542584,0.520605005566653,-3.9954  
4142523526,6.45738217775364e-05,0.000704961017367528,-15.0956652306876  
"Tspan9",2901.14201133792,-0.360364495119884,0.198661987973118,-1.8139  
5796345624,0.0696841977842766,0.149554484138451,-0.684726598829091  
"Tead4",103.500093375509,-0.583857324180911,0.235554944614844,-2.47864  
601244341,0.0131882119786999,0.0418732709918077,-1.85264210066839  
"Fkbp4",13628.1697417388,0.384643956460344,0.143447787783645,2.6814213  
1993338,0.0073310151602939,0.0266828698143383,1.39384719039163  
"Pzp",1189.33011687131,2.43072944288988,1.1110228156532,2.18767388315  
095,0.0286933657797569,0.0761070937251667,6.26062030354736  
"Klrb1a",14.7449066057894,-1.87539506241766,0.662449472563192,-2.83100  
091416974,0.00464025884189086,0.0187204152491595,-7.46058528772631  
"Clec2j",0.121821870984685,0,4.78471990596557,0,1,NA,NA  
"Clec2h",1403.88648856492,1.8338844844156,1.08287741767477,1.693529160  
81069,NA,NA,NA  
"Clec2i",184.966545946502,-1.21675184363411,0.43434209046202,-2.801367  
56338723,0.00508865230156545,0.020154937716932,-4.75057149029959  
"Ceacam12",9.20547217062443,-0.448244091352071,0.465974995246661,-0.96  
1948808250528,0.336075319325516,0.480533833473155,-0.328499106930071  
"Psg28",0.239436804505814,-1.10798154977452,4.77879592743038,-0.231853  
70679143,0.816651641409327,NA,NA  
"Strn4",3587.53028180748,-0.268548610130664,0.161074708005848,-1.66723  
015335787,0.0954686490903504,0.19060492729507,-0.44513340306777  
"Slc8a2",74.6875447886671,-1.40268756513385,0.329525635743315,-4.25668  
722850587,2.07478292487631e-05,0.000295717232962268,-11.3983890374345  
"Sult2a8",12.4183107983566,1.23658364285821,0.529843885328349,2.333864  
13828648,0.0196028370732035,0.0565659489793285,3.55189865597217  
"Mzf1",118.289422357575,0.64251433141217,0.222244651275457,2.891022698  
29575,0.0038399038536355,0.0162726462373799,2.64604731943321  
"Slc27a5",13.9945487672631,0.647702483151966,0.526571165934938,1.23003  
788481649,0.218682918423004,0.354201656704747,0.672243202434733  
"2900092C05Rik",0.0968692525312441,0,4.78471990596623,0,1,NA,NA  
"Zfp606",811.887881809459,-0.0307433378244207,0.105159592225401,-0.292  
34934420937,0.770019534597347,0.851190157182055,-0.00495335810272824  
"Zik1",93.8673120538023,-0.481001269148072,0.221665615012509,-2.169940  
83237009,0.0300113285215076,0.0787247253480902,-1.22260806427973  
"Mark4",1694.29708773532,0.146599058083243,0.169443029222641,0.8651819  
95127212,0.386938906002496,0.531277002412613,0.0927197601702603  
"Ckm",8.39199190400363,-2.0468308627549,1.42897559074927,-1.4323763652



8254,0.152036138790989,0.270919451119238,-2.67302546455759  
"Ercc2",1944.54351034706,0.115021158582028,0.169529230256548,0.6784739  
03337888,0.497471264852943,0.633180672504908,0.0525646090818124  
"Rtn2",274.70400246085,-0.831841611419482,0.249661990589003,-3.3318712  
6104778,0.000862641518946296,0.00526355995442522,-4.36462941627381  
"Ppm1n",4.17500077063101,-2.27479805297532,1.02560751829688,-2.2180005  
629764,0.0265547940313157,0.0717922038300879,-5.99177118926175  
"Vasp",3344.85067021427,-1.06484545188312,0.174079784077509,-6.1169966  
2615047,9.53553845237047e-10,1.52072264455194e-07,-16.7169129183797  
"Gipr",54.2057571408185,-4.2881962806102,1.06289456470745,-4.034451226  
86321,5.4730056345331e-05,0.000619342216263067,-31.6762737788397  
"Qpctl",717.741254382041,-0.0945401855346929,0.135783332735292,-0.6962  
57660128274,0.486267483549855,0.623192020129819,-0.0447081094402891  
"Dmpk",2467.56082547333,-1.04451813696234,0.237146676409785,-4.4045236  
1709439,1.06016591311689e-05,0.000179281135940616,-9.01059356683652  
"Dmwd",2597.58264767131,0.106411520934172,0.164369789054948,0.64739099  
2870347,0.517378923873797,0.650871298644513,0.0456977204811424  
"Nova2",384.825904423949,-0.734126391284747,0.322170570352543,-2.27868  
855457968,0.0226855855956485,0.0634337513185078,-2.02454381247083  
"Pglyrp1",126.46646276208,-1.57987023295516,0.484715779652405,-3.25937  
44608193,0.00111658184532973,0.00640397398956772,-7.97966630967454  
"Pdcd5",2402.28706770346,0.294419118327417,0.129053486525552,2.2813728  
3427149,0.0225263941364315,0.0631153373864265,0.813418629959207  
"Uri1",1675.05188734944,0.0938568100478772,0.129432600538128,0.7251404  
17929168,0.468365890895072,0.606548760671633,0.0469256040560183  
"Pop4",1198.27931773376,0.00875894804733542,0.13761640490928,0.0636475  
57521282,0.949250863055475,0.96857466784529,0.000279670607340033  
"Zfp939",108.922640184495,-0.114918754566954,0.223851514584861,-0.5133  
70458002369,0.607692206415658,0.728035799735331,-0.03647579379013  
"Lilra6",41.4997273592306,-0.829111051712515,0.50675899435244,-1.63610  
525112039,0.101817561394001,0.200024061668537,-1.33430301726753  
"Ttyh1",111.094107283192,-0.211021398167841,0.37273232551839,-0.566147  
295849256,0.571293654245471,0.697652795512507,-0.0759748205879352  
"Tmem238",1057.45055570882,0.807196823536377,0.243467606471721,3.31541  
774790534,0.000915062655030506,0.00550166254942486,4.19960691000849  
"Rpl28",17680.7085264747,0.367664996031702,0.209979941898563,1.7509529  
3725395,0.0799540170419039,0.166201852090095,0.659794046933744  
"Sbk2",9.52695414416286,-1.69077808347923,0.913657765684085,-1.8505595  
2784825,0.0642329467115773,0.140436644425021,-3.31899538489352  
"U2af2",8705.4738791232,-0.104292858095578,0.100462054581786,-1.038131  
84520006,0.299208677377313,0.443580504220108,-0.0847771585514113  
"Zfp583",113.157932070872,-0.993937865397282,0.245359517661788,-4.0509  
4481302071,5.10112386954089e-05,0.000588068177193943,-7.39357346450286  
"Zfp273",325.870788833083,0.253030285633963,0.220003305323799,1.150120  
38233496,0.250094292528569,0.389808065496281,0.238380034710286  
"Cyfip1",3027.50616249447,-0.591203953286961,0.1117929229714,-5.288384  
43054406,1.23401416914861e-07,5.34684628223548e-06,-7.17662694733198  
"Oca2",0.250033303070452,-0.994214896319586,4.78149651183207,-0.207929  
650028887,0.8352838977209,NA,NA  
"Herc2",3010.8276456365,-0.364103209499768,0.186416425143565,-1.953171

28959726,0.0507993018554224,0.117844710003215,-0.778593765794406  
"Nipa2",1996.88712715869,0.00543856674021222,0.183587604821898,0.02962  
38231632701,0.976367065512544,0.98508443949892,8.17303247014194e-05  
"4933421I07Rik",0.146752147186871,1.29557472313525,4.78471990596623,0.  
270773367845369,0.786565344309565,NA,NA  
"Psd3",1066.41234887929,-0.791772437178952,0.130920378854834,-6.047740  
19220398,1.46891579064844e-09,2.10595000632818e-07,-12.1721781510507  
"Siglecg",361.405657279235,-1.46350815015395,0.508881319663661,-2.8759  
3215471387,0.00402836287462493,0.0168805113538442,-5.97344827519697  
"Zfp719",403.538766115788,-0.495765034390986,0.150315005021832,-3.2981  
739535516,0.000973158255753855,0.00575027176367368,-2.55740797636101  
"Csrp3",0.115675247240766,0,4.78471990596623,0,1,NA,NA  
"Zdhhc13",716.306453648142,-0.403859146246378,0.126688576071191,-3.187  
81028858858,0.00143354557050856,0.00776855795824788,-1.9618147508503  
"Siglece",439.470710113159,-1.03927187337671,0.471332129577163,-2.2049  
6717316736,0.0274563981452952,0.0735624528215277,-2.71210522252404  
"Cyp2b10",12.6538942757505,-1.95945072253088,1.08662285610329,-1.80324  
821213278,0.0713492418705852,0.152306494196701,-3.68741267966948  
"Lypd5",0.252479961219923,-0.219867064805833,4.04080678974426,-0.05441  
16747585817,0.956607177522949,NA,NA  
"Zfp108",113.169080927892,-0.138451142777588,0.211603339798443,-0.6542  
95640652298,0.51292135390582,0.646962911342578,-0.0602908082841481  
"Tdrd12",12.7161455717797,1.6159921744279,0.638965954136217,2.52907398  
89459,0.0114363915542347,0.0376539619257799,5.29935077080932  
"Slc7a9",2567.23481092466,2.00009185613778,0.697555213463202,2.8672882  
3401345,0.00414005767951291,0.01721536460549,8.12427912110039  
"Faap24",234.188779504918,0.152898218204258,0.149964442284179,1.019563  
1436052,0.307935692125232,0.452800160260767,0.121141930754128  
"Rhpn2",1026.11154020514,-0.077983774431885,0.320195990856875,-0.24355  
0127605261,0.807579257627188,0.87746895320228,-0.010193548104132  
"Slc7a10",169.691266470343,-2.92765207766971,1.64812694169621,-1.77635  
10829188,0.0756750684266637,0.159273800106119,-5.3784790554996  
"Gas2",7582.66233308089,1.76300488044144,0.614731348933482,2.867927401  
94581,0.00413170327658845,0.0171986715608152,7.16295331230539  
"Kctd15",1483.4946557588,-0.813983851806052,0.217308546889823,-3.74575  
166718476,0.000179854440246401,0.00155788621764741,-5.26193785850715  
"Prmt3",846.624915082959,-0.0164288994739338,0.103708007769861,-0.1584  
14955867162,0.874129829505395,0.921435011931459,-0.00134426231117726  
"Asb7",801.526706177684,0.160940187430454,0.132623881473768,1.21350834  
888878,0.224935524311319,0.360973191529306,0.163990259088305  
"Cers3",277.75101879863,-2.40013270588459,0.760712037901402,-3.1551133  
4946915,0.00160435761633003,0.00848204034794007,-11.4481631836152  
"Snrpa1",1227.51928828447,0.0168105142724131,0.113080232564519,0.14866  
0061013065,0.881821877659677,0.926338180626496,0.00128627171554427  
"Pcsk6",1064.29701266342,-0.885098097665477,0.364211438197561,-2.43017  
655361326,0.0150914693889833,0.0463610320066797,-2.71839824700725  
"Tarsl2",363.722196766026,-0.1199065256662,0.24257175236783,-0.4943136  
39142848,0.621084694176443,0.739220447262379,-0.0362308476033329  
"Tjp1",4069.80121145954,-1.11008337100168,0.213431381116953,-5.2011253  
696259,1.98085420997624e-07,7.64805849230034e-06,-13.0779573936213

"Fam189a1",11.5338741836733,-1.27860590828266,1.07742438016172,-1.18672449948714,0.235336308045067,0.37323231751938,-1.26013544612785  
"Apba2",28.3424667730564,-1.62345001607607,0.507881803953131,-3.19651147853663,0.00139100291824829,0.00758651046153988,-7.92468219952609  
"Mphosph10",937.765402218239,0.0436816420614463,0.0961199770361684,0.454449152073867,0.649505581912884,0.761147830971077,0.011921929276845  
"Mtmr10",1749.90580898643,0.757780713714523,0.175473239930467,4.31849730485858,1.57095140162543e-05,0.00024000609213858,6.31598574080914  
"Trpm1",37.6413081238996,0.388649010866866,0.479801780966259,0.810019942160651,0.417928714322354,0.561094406930885,0.224587089856768  
"Chrna7",15.0588159657059,0.497752984440824,0.541542669958188,0.919138993201136,0.358022875987907,0.503079420294913,0.341959898127047  
"Crtc3",1515.20851726725,-0.301805462322424,0.188240922140408,-1.60329358192003,0.108869852800594,0.210151904752598,-0.470793781326973  
"Blm",137.900727571966,-0.943115487388312,0.39401812411876,-2.39358402484057,0.0166846592307949,0.0500565449579996,-2.82425553738172  
"Furin",7039.22916451439,0.443330465867511,0.160334851489636,2.76502869930414,0.00569177879154052,0.0218952539815427,1.6941808932968  
"Hddc3",666.758001663974,-0.277511013406224,0.234690440563733,-1.18245554756996,0.237024993748494,0.375153285827432,-0.272077507145452  
"Unc45a",4380.78157362078,0.0101242451694349,0.116112980083319,0.0871930525094616,0.930518061619992,0.956679177759194,0.000448374280180391  
"Vps33b",692.970979184424,-0.172135021628031,0.142277411431731,-1.20985488768627,0.226334580318505,0.362469950476403,-0.174684978776454  
"Iqgap1",8692.54605478365,-0.241094441808117,0.190776808951864,-1.26375130778578,0.206319303055505,0.339334776126212,-0.260567186302804  
"Cib1",5583.68285119216,1.23783569274496,0.255355323106887,4.84750299184806,1.25025147653229e-06,3.28094256923642e-05,12.780399418723  
"Sema4b",2028.95162456426,-0.125761702967284,0.202695346954625,-0.620446916304583,0.534963592350002,0.666797936689915,-0.0509672218146592  
"Idh2",11486.7094780518,1.28968913317633,0.245721502920652,5.24858068116568,1.5327551037421e-07,6.34515053349542e-06,15.4347670566072  
"Mesp2",3.42988771260589,-1.41593470051272,0.898105315934193,-1.57657980126739,0.114892243435376,0.219044584189201,-2.15006850861896  
"Mesp1",1.04301602627917,0.442843738203621,2.08231064238041,0.212669391968041,0.831584842285062,NA,NA  
"Pex11a",2691.03336936791,0.504344225204569,0.475092684921406,1.06157017611838,0.288430858986868,0.432452171941507,0.422783464415453  
"Plin1",7729.49998473901,-4.02977204057614,1.64255918765555,-2.45334966974791,0.0141532683800661,0.0443309922690005,-12.5570567867381  
"Rhcg",4134.07355750583,2.14557357180511,0.629184074337612,3.41008881075687,0.000649417285259418,0.00422500441374312,11.7292820832056  
"Nr2f2",10322.4525835048,-0.164107797207823,0.220174762994237,-0.745352441742466,0.45605868622343,0.596153946365275,-0.0848857995337793  
"Pgpep1l",40.2707890440425,0.485591730868242,0.40695062990976,1.19324481934313,0.232773506350592,0.370046296520493,0.482739926113414  
"Synm",442.954158701158,-1.64329217026401,0.407794586208118,-4.02970570439441,5.58467267469311e-05,0.000629058046280567,-12.1131782481639  
"Ttc23",666.197304624915,0.165699429197393,0.16374300988655,1.01194810888232,0.311562865005963,0.456673563614532,0.129872966737484

"Lrrc28",1005.65443019476,0.777698719516579,0.275757624534282,2.820225  
62687073,0.00479898934818966,0.0192413519043804,3.07244933130113  
"Mef2a",4069.55473690851,-0.191351632778803,0.120224340399284,-1.59162  
139832328,0.111469799074939,0.21407820202432,-0.294952066685623  
"Rab38",283.209743836549,1.34559625245624,0.405974354527461,3.31448584  
732024,0.000918118274789667,0.00550814465287659,6.99915582511467  
"Ctsc",3557.69893077936,-1.28725918090788,0.254576087903165,-5.0564811  
1537296,4.27063137856423e-07,1.39851241308359e-05,-14.3883605481742  
"Nox4",4883.41881254169,2.18854992459858,0.502165422998827,4.358225047  
69248,1.31121516957375e-05,0.000209386350338649,18.5399274209094  
"Cd22",219.46521915766,-1.75674148276816,0.600839493257118,-2.92381160  
440197,0.00345773950842471,0.0150758061125369,-7.36894036808558  
"Tyrobp",1847.82334023856,-1.29293250868426,0.368658818065818,-3.50712  
486810345,0.000452976534532294,0.00320004944576473,-7.42736588974901  
"Sipa1l3",2107.29811666517,-0.0173989213688857,0.148068823394632,-0.11  
7505636703239,0.906459377546746,0.942925053407193,-0.00102250809769088  
"Dpf1",15.9507556546791,-0.454303804217374,0.814920797052508,-0.557482  
157604209,0.577198046301113,0.702407057119226,-0.160479270527267  
"2200002D01Rik",1279.97926792673,0.0840008752059418,0.272665245723785,  
0.308073274916145,0.758026576412487,0.843078100900728,0.01433858642053  
66  
"Yif1b",1377.36860417231,0.427519764137819,0.188761899736965,2.2648625  
8473536,0.0235211134152152,0.0652254922678961,1.16708829929185  
"Rasgrp4",406.353526715992,-1.16635663726646,0.419373145933643,-2.7811  
9056638646,0.00541599345341052,0.0211117633655734,-4.49971629962715  
"Fam98c",1711.07778933679,0.463362545395907,0.136404780886629,3.396967  
04458639,0.000681371723080448,0.00437163075242599,2.51727224658952  
"Psmc8",5432.77533455222,-0.137397935893116,0.175463866196899,-0.78305  
5445381176,0.433594553470034,0.575744116287028,-0.0758562956651424  
"Ryr1",76.1727060222683,-1.70283568388253,0.492471112558751,-3.4577371  
9606626,0.000544732481286319,0.00369700513956261,-9.53627524322475  
"Nfkbib",1006.6520952858,0.112372920617087,0.0896275756081079,1.253776  
19392977,0.209923364386911,0.343667989825021,0.120023182921034  
"Fbxo17",114.422635164529,-0.331024684187525,0.174634957909542,-1.8955  
2360048663,0.0580230681151619,0.130292961201132,-0.674618314809764  
"Lrfrn1",139.182496889924,-0.144661794059611,0.2238332531104,-0.6462926  
84618493,0.518089824574088,0.65146146403213,-0.0619929361264371  
"Pak4",2237.0689397767,0.397475585358133,0.101172973015601,3.928673572  
70248,8.54156890553802e-05,0.000875623083702315,2.79845660156026  
"Psmc4",5199.91931007055,0.252412606888739,0.122590099734901,2.0589966  
6803907,0.0394945576777541,0.0969972963297994,0.588896829437298  
"Zfp626",709.825151931888,-0.129001839324343,0.14874719726969,-0.86725  
5596691697,0.385801980054807,0.530107436237116,-0.081874317593826  
"Mfge8",5522.4398178602,-0.572787645938856,0.197285142979238,-2.903349  
11838311,0.00369194820262402,0.0158140610840868,-2.37526776753825  
"Hapln3",16.0469501511711,-0.655709133455106,0.614207089581881,-1.0675  
701153197,0.285714470092732,0.429883535602137,-0.55357650464822  
"Acan",0.110907021323848,-0.186186710250895,4.78471990596567,-0.038912  
77105244,0.968959934454095,NA,NA  
"Aen",1670.20424888772,0.160926722080477,0.175716642484809,0.915830850

196159,0.359755620008003,0.50485929746049,0.109989473031126  
"Det1",407.085569327399,-0.164852940880089,0.147740461610124,-1.115827  
98025313,0.264495774425995,0.406425928738124,-0.148425936108865  
"Mrps11",1104.82118829726,0.577641660915268,0.217986193766616,2.649900  
21126619,0.00805155481529524,0.0286215525594579,2.05270466760896  
"Mrpl46",1167.6342194251,0.557833200994393,0.299422208614572,1.8630321  
4973762,0.0624577431253967,0.137589094504461,1.10645301222255  
"Ccdc90b",1098.997365362,-0.0414315220861877,0.208844767175861,-0.1983  
84295888533,0.842744403334078,0.899290191342374,-0.0043979354826574  
"Tmem126b",1850.84109163051,0.380707891917625,0.186537512921493,2.0409  
1866539386,0.0412589121953537,0.100183293255181,0.875915143567552  
"Tmem126a",1217.89354259938,0.444786117479513,0.238888084985668,1.8619  
0164112286,0.0626169556945941,0.137799706787042,0.881545646130671  
"Syt12",4831.5116422655,-0.569200433022209,0.245731406095298,-2.316351  
99613624,0.0205390574950692,0.0586168827632991,-1.61466937996443  
"Ccdc83",1.04434075302753,0.917570190803262,1.78877313783318,0.5129606  
27256933,0.607978862579912,NA,NA  
"Eed",1349.69064971044,-0.0559074954888463,0.108703307895801,-0.514312  
734093032,0.607033360067171,0.72746997262383,-0.0177887897880456  
"Me3",1507.35515921464,1.25594514158192,0.207078822543009,6.0650583490  
7898,1.31905755746176e-09,1.99371970972011e-07,19.3768391457048  
"Zfand6",5064.02410043405,-0.155632249679288,0.159518446526902,-0.9756  
37947007224,0.329243912769792,0.474028765207942,-0.1161774936595  
"Fah",12604.3087197573,1.61142351713124,0.41399860414989,3.89234045955  
337,9.92817866811706e-05,0.000985138054305071,11.1554479426318  
"Sh3gl3",35.0920656886122,-1.53758037673297,0.52343680616507,-2.937470  
88210698,0.00330901244352243,0.0145608496104266,-6.50307148340792  
"Ddias",51.240982123573,-0.299348206532653,0.336550007934974,-0.889461  
296909228,0.373755214625784,0.518940338586736,-0.19636235250698  
"Rab30",249.639794181768,-0.883222696263713,0.297476635159645,-2.96904  
896678598,0.00298722990029977,0.0134951363753579,-3.80264989575745  
"Ndufc2",6699.78200952519,0.44219898593451,0.353763501150105,1.2499847  
6241019,0.211305113650407,0.345292248236308,0.470218537399169  
"Anapc15",1198.6569901448,0.278128754537267,0.18018387563964,1.5435829  
2910467,0.122689403175854,0.230329095236163,0.40836147135562  
"Tmc5",57.051683050955,-0.441129555658423,0.366643873261439,-1.2031553  
9909178,0.228916190648852,0.365463676841997,-0.444035886607208  
"Art2b",76.5047067112163,-1.86274304980191,0.75717856550084,-2.4601106  
458551,0.0138894187765679,0.043679981823471,-5.83199769605095  
"Coq7",1947.77057398213,0.206878837923399,0.40139109195527,0.515404656  
629631,0.60627027914057,0.726787484894267,0.0660194151660981  
"Gm45837",2139.66759226346,-1.10236235347075,0.312231471233822,-3.5305  
9334190312,0.000414628687142569,0.00298098456559949,-6.41079007656816  
"Arl6ip1",19920.3706695861,1.06411058387395,0.265057256900819,4.014644  
21806843,5.95355318450108e-05,0.000662361615482035,7.78896907474478  
"Smg1",5498.85729521746,-0.0532954967795145,0.184925404434071,-0.28819  
9974160474,0.773193668564249,0.853273219584609,-0.00845668845111145  
"Xylt1",691.339678809142,1.06987801921752,0.274436308805298,3.89845652  
667105,9.68077760528396e-05,0.000965502822239523,7.42801494464255  
"Nucb2",1316.92623511631,0.249784798154754,0.167665391466099,1.4897814

9855845,0.136281697369155,0.248896640624183,0.347380106660767  
"Pik3c2a",2786.98451470215,0.330978334495491,0.158930750485782,2.08253  
175350796,0.037293925598822,0.0928680665805658,0.786594978275811  
"Ipo5",3715.51828091914,-0.264119030134894,0.147896166279661,-1.785840  
95030201,0.0741250141824205,0.15693247852973,-0.489132501374084  
"1110004F10Rik",3157.05318291024,-0.195140989147857,0.165575648310909,  
-1.17856092449919,0.238573059037271,0.376706060797423,-0.1905142109745  
97  
"Calcb",6.25536971220257,0.207172228199525,0.822707652888123,0.2518175  
53261168,0.801182088905563,0.873096823691072,0.0281150986545096  
"Calca",105.278086141567,-0.479317820643322,0.328365380042856,-1.45970  
875669282,0.144370134245606,0.260352282419611,-0.645027401531224  
"Cyp2r1",43.9617502983612,-0.318610750969625,0.377152305687605,-0.8447  
80069390667,0.39823364446259,0.542610733733863,-0.194786855423167  
"Pde3b",2273.85339029243,-2.23084643718683,0.612423073241771,-3.642655  
76307923,0.000269839592314081,0.00213095681285539,-13.7223473396742  
"Mylpf",55.548484975679,-0.223336286048999,0.290450607507013,-0.768930  
345733935,0.44193466162691,0.583509700922065,-0.120309962388962  
"Qprt",2322.7486425463,1.76709909253641,0.543619061880278,3.2506201795  
5062,0.00115153587137284,0.00655017325822581,8.88544035922104  
"Kif22",229.51766587383,-0.574810944813784,0.554604216267407,-1.036434  
5022156,0.299999481118589,0.444448741193697,-0.466126006696596  
"Maz",7420.5223252937,0.0205328418349,0.14756434883414,0.1391450034993  
12,0.889335566450144,0.93147103967796,0.00145763012565433  
"Pagr1a",303.822736049649,-0.129290919598187,0.549154414621768,-0.2354  
3636572099,0.813870063436636,0.881651119333714,-0.016285336522801  
"Mvp",7036.12320945181,-0.552486812653968,0.146807492024744,-3.7633420  
8175731,0.000167657613948113,0.00147984977671359,-3.59990169466144  
"Cdipt",3899.47493622232,0.0309525443172973,0.131941819631271,0.234592  
371120835,0.814525131300544,0.881968734941856,0.00388759844627302  
"Sez6l2",103.50272784819,0.451706783119802,0.445652235381209,1.0135858  
1256395,0.310780430252047,0.4560545517464,0.354654349075578  
"Kctd13",592.825596196871,0.0125528023752838,0.10494171054318,0.119616  
902662537,0.904786629476253,0.941985577839354,0.0007502221839778  
"Stard10",14259.7196131396,1.79906931452847,0.415006114763553,4.335042  
9078701,1.45731693692435e-05,0.000226232210478909,15.101295365131  
"Ino80e",1667.72102976193,-0.285913239533161,0.0857560931912033,-3.334  
02827593467,0.000855979556682138,0.0052303006569064,-1.50198416586461  
"Fchsd2",1182.67139845862,-0.264198788135575,0.222137996634068,-1.1893  
4532650348,0.234303805809639,0.372084672232965,-0.261195861666238  
"Klk10",5.15112265039442,-2.29659785101966,1.00637707379765,-2.2820450  
8112775,0.0224866788381176,0.0630312340404855,-6.34808329846379  
"Aldoa",55671.3292833176,-0.751035545743773,0.497334291361345,-1.51012  
218298476,0.131012250122338,0.241466759890854,-1.06723912646593  
"Ppp4c",3965.93224252093,-0.108347839264432,0.113841660819545,-0.95174  
1554756291,0.341228069180037,0.485781607248274,-0.0782267199796407  
"Tbx6",193.247811982927,-0.601037772222532,0.283143283027209,-2.122733  
64141495,0.0337761782691936,0.0861323468339965,-1.47366663222147  
"Plekhhb1",638.370382523984,0.409746403552022,0.209441727455773,1.95637  
425516625,0.0504210826419336,0.117176432580741,0.878526819114806

"Gdpd3",347.417556784821,0.260530979638321,0.215960152219956,1.2063844  
9714079,0.227669270804298,0.364128901824476,0.263200731288386  
"Rab6a",5336.26119020365,0.10459222924538,0.0911050234510833,1.1480401  
9891986,0.250951969293032,0.390850826525723,0.0982570057126754  
"Mrpl48",2365.92668910061,0.213494550534171,0.191878263144684,1.112656  
25941792,0.26585608806301,0.407616733903639,0.191595971219285  
"Coro1a",4580.68035179866,-1.16069514412998,0.415059590720222,-2.79645  
422026248,0.00516667301131692,0.0203824217255232,-4.51868187186575  
"Dnajib13",28.4954066378238,-1.82158267741127,0.530116642673108,-3.4361  
9220899377,0.000589952266392423,0.00391121216310453,-10.0986866630029  
"Sult1a1",1753.02957612141,-1.09410085540745,0.417039945872278,-2.6234  
9174518291,0.0087033554098079,0.0303628598640964,-3.82337387768566  
"Klk7",1.46249748982339,1.2768185381821,1.41128727058858,0.90471909213  
0404,0.36561422393135,0.510605264192508,0.85822438795598  
"Sgf29",605.867403546599,-0.20149461785476,0.203735785555605,-0.988999  
636491287,0.322663319520235,0.46778863885832,-0.153083261332987  
"Nupr1",4999.06932745628,-0.930614090499367,0.308610650851013,-3.01549  
569962391,0.00256559577045359,0.0120656021061997,-4.11089158996742  
"Ppme1",1688.88937652255,-0.270990353591768,0.1735007480758,-1.5618973  
2088865,0.1183121797351,0.224053115819249,-0.405366917719555  
"Cln3",1480.8892870509,-0.120619979715017,0.181717835475601,-0.6637762  
2977582,0.506833541507482,0.641412370501258,-0.053565246891874  
"Nfatc2ip",437.738588349236,-0.292476667505139,0.119957128920175,-2.43  
817662308144,0.0147615595328444,0.0456931080761074,-0.902526782027408  
"Cd19",184.41534231174,-1.58878069767284,0.722164448558639,-2.20002618  
634007,0.0278050371810091,0.0741848132122762,-4.13272971515872  
"Lipt2",155.800584566478,0.186197512059467,0.164198714232792,1.1339766  
7533186,0.256804332076041,0.397678569360546,0.171694814012964  
"Pol d3",1753.1879718208,-0.0148577220296716,0.114455638877227,-0.12981  
2057976531,0.896715122755394,0.936383433134355,-0.000976601569548343  
"Rabep2",1711.5083357011,0.0440942278937662,0.13287389807032,0.3318501  
86787103,0.740002385973033,0.830564501594646,0.00818607960551749  
"Pgm2l1",635.274504486074,-0.166305926799419,0.209954572001971,-0.7921  
0433577916,0.428299842182602,0.571046931268898,-0.0931785301569506  
"Atp2a1",12.4931189077099,-1.94276845291901,1.00716961459153,-1.928938  
70582754,0.0537384719908993,0.122793006782908,-4.07448126536657  
"Syt3",396.292624724197,0.394069827921744,0.13963632151882,2.822115504  
30045,0.00477079912402927,0.0191558981302147,1.5586031576104  
"Chrdl2",8.05248411546646,1.19071976269136,0.667977093885839,1.7825757  
403814,0.0746553918013319,0.157672316869841,2.19954082046794  
"Sh2b1",3738.57910185245,0.0313777327204412,0.123697235607592,0.253665  
593788866,0.79975391696075,0.872162120833555,0.00429184483708243  
"Gm9755",4.04629294778113,-1.52647037058418,1.64022031288867,-0.930649  
595416749,0.352034850854469,0.497106868401129,-1.06692684566657  
"Slco2b1",2901.94854606042,-0.824943046775051,0.129616949104084,-6.364  
46894080658,1.95966569875087e-10,4.15321323850483e-08,-14.021390686363  
1  
"Eif3c",7654.45895542174,-0.026949538253997,0.210439714108821,-0.12806  
2986438297,0.898099127350362,0.937427022755747,-0.00174138124247852  
"Myh14",2178.55539396309,0.69822658015078,0.269435617932974,2.59144127

085853,0.00955748530797232,0.0326659206108804,2.38892843004551  
"Spns1",3183.82941996686,0.389422846464675,0.12193671785965,3.19364710  
89283,0.00140487737521999,0.00764294058650652,1.89803638330532  
"Lat",567.36275915365,-0.790637013717469,0.441427774038201,-1.79109032  
149175,0.073278802045235,0.155590774504845,-1.47100068801751  
"Rps3",26401.9281711702,-0.568578836756629,0.22665935947959,-2.5085169  
130544,0.0121239164019203,0.0392612725468597,-1.84078346638287  
"Il21r",614.380925507771,-1.52670189164197,0.468024177775713,-3.262015  
00721101,0.00110623287000111,0.00636075744596924,-7.72145941596693  
"Dgat2",14101.7123171095,-2.16545912491005,0.928291653520707,-2.332735  
74818558,0.0196620187379614,0.0566863878977927,-6.21534662182999  
"Il4ra",1790.02706667926,-0.88868905936711,0.196194830575021,-4.529625  
25445998,5.90883965129118e-06,0.000112730484854085,-8.07863738350624  
"Nsmce1",1197.17242964143,0.176233147937984,0.198404884082257,0.888250  
048647589,0.374406262486995,0.519511336889512,0.115409210501879  
"Psmal",4813.54082775062,-0.489807133032099,0.257458208889924,-1.90247  
238627189,0.0571094255600118,0.128800013052572,-1.00385695858259  
"Kdm8",199.956454935553,0.16745920290914,0.143354462473309,1.168147820  
58368,0.242747143787079,0.381577217797522,0.161337236566366  
"Thap12",2245.58376313627,-0.596178055513756,0.213310547870986,-2.7948  
8314789917,0.00519184775738499,0.0204671750047498,-2.31849645162688  
"Copb1",4243.83685792242,0.441332075921999,0.15818193219144,2.79002835  
410985,0.0052703425799763,0.0207221495511954,1.71084679637248  
"Zkscan2",58.6726223914823,-0.966737706923266,0.465039643810012,-2.078  
82858975829,0.0376331081162822,0.0935573558652647,-2.29037621960859  
"Far1",8436.61049974985,0.3943784102653,0.148499317358208,2.6557590787  
7061,0.00791301242788794,0.0282475130572975,1.4066491390624  
"Acer3",1512.97552252518,-0.0212078871900798,0.119934456511089,-0.1768  
28976484493,0.859642727756942,0.911029575198301,-0.00197614918310142  
"Myo7a",2141.30007849233,0.0698593548261821,0.253295541901441,0.275801  
754352885,0.78270033617858,0.859489251791505,0.0105778910951543  
"Aqp8",31.5758342288368,-0.605071500137829,0.784210327372827,-0.771567  
880475219,0.440370403999271,0.582164359426251,-0.327345174048096  
"Lcmt1",1584.85904371701,0.393248650573764,0.17193645398326,2.28717436  
857254,0.0221856474603889,0.0624072086040118,1.09090104891011  
"Arhgap17",1893.58775783288,-0.22868461025753,0.131665292836562,-1.736  
86326389294,0.0824113090722396,0.170091638011065,-0.405096021221628  
"Disp1",293.12278425091,-0.672127054349306,0.205394580735639,-3.272369  
95222572,0.00106649923795898,0.00619071215889378,-3.41756789403299  
"Slc5a11",1208.68183133858,2.19078140295458,0.845614633526089,2.590756  
25716095,0.00957652929082978,0.0327068082173059,7.49284925716709  
"Parva",6260.66527676669,-0.179855333707668,0.102312649566644,-1.75789  
92868376,0.0787646472078164,0.164321965681361,-0.324805705817715  
"Dkk3",2713.65449032861,-1.11217217456772,0.323872055852285,-3.4339862  
1298459,0.000594774447242317,0.00393382366768341,-6.15936896897499  
"Pak1",2646.52968369354,0.0283583713613262,0.254794412464862,0.1112990  
31587818,0.911379223316629,0.945417753576699,0.00159170949767218  
"Trat1",52.2301806449733,-0.905142963508255,0.252670355306943,-3.58230  
771634721,0.000340572284099584,0.00255599630306916,-5.40308182985687  
"Rbbp6",6189.11389251939,0.305201999947451,0.179885995552368,1.6966412



4775406,0.089764506541328,0.181672031196057,0.520537955854183  
"BC017158",1743.00510505864,0.152987656802886,0.118065642100679,1.2957  
8473534602,0.195049658495263,0.325633893427573,0.171649329072106  
"Slc5a2",12636.4909244196,1.85954441576113,1.00782322770034,1.84510970  
242693,0.0650215821093196,0.141795191585674,3.63238120474095  
"Tgfb1i1",1748.35751566419,-1.06815823733626,0.215432370183089,-4.9582  
0677472221,7.11468186140432e-07,2.08604611930318e-05,-11.5122409670658  
"Cox6a2",25.0459162156957,0.677709459521161,0.561099877867815,1.207823  
21695821,0.227115269075451,0.363391885477855,0.686027294530094  
"Itgam",1053.49581928453,-1.51526598047878,0.384968599440865,-3.936076  
81945898,8.28244704487836e-05,0.000854450542227716,-10.7054328493591  
"Lyve1",136.317313143934,-2.02090237798791,0.516487130762407,-3.912783  
60605961,9.12382877111953e-05,0.000919361309453688,-14.1298086175984  
"Rnf141",1617.37098033815,-0.61173930782158,0.200227527602034,-3.05522  
080379205,0.00224894884316193,0.0109473204546418,-2.76179532602624  
"Itgax",1620.43647636386,-1.45723589070641,0.47268306984325,-3.0829026  
5439305,0.002049921991463,0.0101806874654981,-6.68472390358655  
"Adm",387.715086298036,-0.216182270627292,0.207517375873095,-1.0417550  
3240507,0.297525267212873,0.441802074842429,-0.176597846653092  
"Dkk1",29.0778465433534,-1.56945241428654,0.403815864720415,-3.886554  
61907907,0.000101677057225853,0.00100379709457705,-10.835445126214  
"Pycard",1430.1580453704,-0.134190721191773,0.203827409124996,-0.65835  
4643116133,0.510310273313983,0.644640732690381,-0.0589180626584433  
"Fus",18521.0279134392,-0.104518939022162,0.182499465208795,-0.5727081  
93432696,0.566842288859108,0.694064992977574,-0.0381692371676368  
"Tead2",737.434544397312,-0.981747967775612,0.345883675612606,-2.83837  
612757181,0.00453437155427973,0.0184189951177805,-3.92146738238364  
"Cd37",809.571677976489,-1.33057906064859,0.44241667946927,-3.00752463  
095373,0.00263384779663488,0.0122876278810099,-5.85343335541246  
"Prss8",8451.33506733223,1.91574904320612,0.425103500032566,4.50654733  
037804,6.58909931128615e-06,0.000122473077570503,17.2563381073959  
"Kat8",783.464285566528,-0.389802835411753,0.163505703740667,-2.384032  
0337082,0.0171241116923322,0.0510763239677365,-1.15944289136993  
"Bckdk",3560.7994696497,0.504427035111579,0.243633907126088,2.07043034  
798323,0.0384120623476798,0.0950334210956809,1.18718246922875  
"Gm21974",0.77877798716069,-2.12925847848195,3.00194438888195,-0.70929  
3112280131,0.478142601780606,NA,NA  
"Stx4a",5045.1636606769,-0.169801003301708,0.161433024134704,-1.051835  
60929901,0.29287497842052,0.436847944403557,-0.140624113501793  
"Stx1b",210.741155296375,-2.61574762919728,0.567523937128272,-4.609052  
51403708,4.04508161510556e-06,8.43740065777616e-05,-24.5363697925117  
"Fbxl19",2537.7959953229,-0.0179130830289105,0.169551615541923,-0.1056  
49733691162,0.915860263748601,0.948401052768082,-0.00094899599421782  
"Bcl7c",1825.75635867479,0.0252724571776451,0.187166752758263,0.135026  
423257372,0.892590982902907,0.933727076808889,0.00173295999728183  
"Phkg2",2626.99680527404,0.479695656246205,0.223962855400042,2.1418536  
3635132,0.0322052617313184,0.0829947387308018,1.19395196482401  
"Rnf40",3870.09239374595,0.070331253387369,0.112715114036688,0.6239735  
81435377,0.53264493512656,0.66484290026872,0.0287095345757917  
"Prr14",2550.77240701079,0.234924198865241,0.195476893577199,1.2018003

4870701,0.22944089033882,0.366121489469377,0.236049500394607  
"9130019022Rik",209.288997624769,-0.0635105000119308,0.173558039043503  
, -0.365932343796599,0.714415560865204,0.810574911557037,-0.01333793637  
2086  
"Nucb1",7913.81789075872,-0.229346620476304,0.181871957883821,-1.26103  
343882628,0.20729679979805,0.340358215204035,-0.247179843506967  
"Hsd17b14",225.201665450479,-0.0164847937147839,0.413475814220814,-0.0  
398688221845554,0.968197707623757,0.980477693900995,-0.000325004027088  
057  
"Bcat2",4347.50229438306,0.1231122575007,0.300662695263578,0.409469679  
611474,0.682195013409892,0.786209627720872,0.0296124153826958  
"Fgf21",3.67946027100879,-3.99689536922251,1.5775537883704,-2.53360322  
715289,0.0112896482642756,0.0372841398809021,-13.1465372761307  
"Itgal",834.303432362099,-1.50963886942776,0.47719641866794,-3.1635586  
7389326,0.0015585293272736,0.00828467961373519,-7.23622339798097  
"Abcc6",462.883332382409,2.02435236123128,0.672782918845471,3.00892353  
911894,0.00262175088044056,0.012249915808011,8.91167727618988  
"Nomo1",2759.40188262464,-0.143991573630854,0.174729796125268,-0.82408  
1392091956,0.409893312411768,0.553513680875572,-0.0851665247212889  
"Ush1c",3946.56858412576,1.94770392213759,0.662016413338403,2.94207799  
51901,0.00326017803087044,0.0143849176840715,8.2613322719932  
"Sergef",703.755942225635,0.798928978647254,0.181293872112706,4.406817  
33660903,1.04900579305802e-05,0.000177702128175893,6.89907277754981  
"Lamtor1",3338.39534077815,-0.336903310295231,0.318971444994344,-1.056  
21777617493,0.290868731196495,0.434486977772869,-0.280838996392079  
"Rgs10",772.020094833019,-0.939917567030049,0.308294108605436,-3.04876  
914866052,0.00229780978718397,0.0111255761684909,-4.22822731670473  
"Tial1",4445.94183982297,-0.00638711298408078,0.148059793901641,-0.043  
1387402060269,0.965590937810552,0.979228745789391,-0.00013406557340621  
6  
"Bag3",2101.41676531892,-0.424285306535304,0.21113683422118,-2.0095276  
5111007,0.0444812052735084,0.106322536162412,-0.950941327848792  
"Fgfr2",1405.47629035495,-0.126410505499271,0.16233142055634,-0.778718  
655119504,0.43614546447543,0.578304268367354,-0.0692293621964293  
"Ate1",2138.82038833159,0.00840592266176975,0.140715947163992,0.059736  
8161262731,0.952365249051226,0.970244861929682,0.000253916061326205  
"Ldhc",0.437352914812939,3.40102936315834,4.68366244651603,0.726147411  
773496,0.467748406460144,NA,NA  
"Tacc2",5737.70675412737,0.790691292998286,0.20494346649711,3.85809465  
660343,0.000114274393637123,0.00110303075600823,5.38436548110424  
"Ptpn5",13.990764057177,-1.86054879726484,1.00379646075999,-1.85351201  
164446,0.0638090061147187,0.139791910249976,-3.66081640413338  
"Fam24b",1.66094648996878,-0.934277647914555,1.50257651544279,-0.62178  
3741668048,0.534084078399386,0.666297994793731,-0.379333793262146  
"Acadsb",5384.51415182313,-0.298139548789032,0.352600436062846,-0.8455  
45037090914,0.397806598187162,0.54225622563292,-0.182466367354422  
"Cpxm2",670.30503086732,-2.45339619768675,0.572209646778624,-4.2875827  
2688807,1.80627996019486e-05,0.000266204434345271,-20.1945076243844  
"Chp2",57.8998274498009,-2.88257429982333,0.568383644389353,-5.0715292  
8884899,3.94631513936072e-07,1.32150888591343e-05,-32.3832757768293

"Ern2",28.8636305929552,-1.99799990583791,0.583745136626268,-3.4227264  
2712755,0.000619964389761354,0.00407005578167235,-10.9971884326764  
"Plk1",194.438965578775,-0.438324944591252,0.349368910844658,-1.254619  
2033273,0.209617028908419,0.34328177638639,-0.468658636589975  
"Dctn5",3676.47401098206,0.205825664561393,0.0790644597589435,2.603264  
03530647,0.00923408081058431,0.0318215107184116,0.709607191633156  
"Ndufab1",7557.15654629801,0.81243225354006,0.363338088731084,2.236022  
80833641,0.0253502771520045,0.0692171550076717,2.16960564829218  
"Ubfd1",2505.69644113664,-0.0350596017053708,0.0872065136236543,-0.402  
029621969213,0.687662226121855,0.790381872490211,-0.00824738800907585  
"Ears2",608.691218429399,0.146536175000564,0.208635714764906,0.7023542  
21403002,0.482458286787411,0.620062729930851,0.0700347123978168  
"Gga2",3226.61115082307,-0.00359130353635888,0.271973455742402,-0.0132  
04610451986,0.989464551353022,0.992978528091061,-2.53051810369112e-05  
"Scnn1b",1880.09752547591,1.21392467795494,0.328428465203057,3.6961615  
8941767,0.000218883687332566,0.00181762952964666,7.66013431000867  
"Mettl9",3637.28817900357,0.272997334386037,0.185927199335726,1.468302  
29983236,0.142022126512367,0.257021294109721,0.370893179616348  
"Mfsd13b",29.1801051759441,1.16923317275653,0.472235120075779,2.475955  
56334079,0.0132880115623202,0.0421421030322249,3.7026200022893  
"Cdr2",2418.97708217033,0.604406243891255,0.232534651895923,2.59920936  
06839,0.00934387659557069,0.0321147375040432,2.07821475146973  
"Mrpl17",2624.54914127249,0.0107068242800178,0.366033113083568,0.02925  
0971830992,0.976664428962715,0.98525471005355,0.00015905075640312  
"Polr3e",5956.55204707097,1.59432040414839,0.423190134238982,3.7673855  
6775535,0.000164966116453933,0.00146204969937218,10.4075895544116  
"Arfp2",2898.42611906641,0.0132352950433108,0.130581411713623,0.10135  
6654592899,0.919267343839178,0.950561510035433,0.000671061300187312  
"Dnhd1",588.675840572257,0.38820617484168,0.228846167006135,1.69636301  
940453,0.08981715258472,0.181740851089339,0.661958882544443  
"Uqcrc2",13873.7916407628,0.217573348333182,0.414169094530281,0.525324  
924545462,0.599357333537579,0.721152069689338,0.0711258696065772  
"Pdzd9",4.57180905367802,0.0710743336454207,0.801747288220884,0.088649  
2972157574,0.92936062876535,0.956303244594089,0.00317561649192843  
"Rrp8",843.088330016055,0.385909537778,0.333415461753327,1.15744343633  
203,0.247091236357057,0.386350034201275,0.36700440687321  
"Vwa3a",110.823259224536,-1.73226007358726,0.73380211292729,-2.3606637  
853316,0.0182422609122716,0.0535109979340261,-5.07182897111763  
"Ilk",6110.74208162419,-0.332073958531196,0.140232273170017,-2.3680280  
6532695,0.0178831792780221,0.0527194178353304,-0.977217758286162  
"Tpp1",7812.24582836356,0.30030162714678,0.142775317980216,2.103316115  
10325,0.0354381456788001,0.0892845282911544,0.725506827644899  
"Hpx",85.3961224282055,0.0114326232547756,0.334837312594964,0.03414381  
4995329,0.972762469523751,0.983326857669524,0.000192224740592775  
"Cnga4",10.3817268739861,0.462722645398836,0.579574791145885,0.7983829  
73979909,0.424648280558885,0.567650508458571,0.26201639794925  
"Cckbr",1.74154780006492,2.09958346745293,1.10317454541839,1.903219645  
67868,0.0570118907229175,0.12861481491559,4.30610559135528  
"Crym",605.454248820066,1.21721497669517,0.591931766001034,2.056343393  
96653,0.0397494283562048,0.0974395717990045,2.83431291038081

"Anks4b",1569.98990831214,1.44687679530602,0.579677482641017,2.49600310281854,0.0125601502875632,0.0403057620649945,4.6462987944741  
"Zp2",0.330971878098449,0.433072734184038,3.90222404385468,0.110981001940688,0.911631411911495,NA,NA  
"Tmem159",1613.19231259228,-0.0606687207238001,0.167120205748088,-0.363024449690124,0.716586620231021,0.812137056571986,-0.0126243213812411  
"Trim30a",1493.84558747028,-0.92802282523459,0.245641786959101,-3.77795177572578,0.000158123487473524,0.00141728516627766,-6.08691293239353  
"Lyrml",267.627496946785,0.666781969220186,0.242201930311513,2.75300022738296,0.0059051855230071,0.0225539586536696,2.52833366163309  
"Rexo5",384.374341199677,-0.0826577574544225,0.336508006822317,-0.245633850543317,0.805965682933222,0.876643918656252,-0.0108822567286721  
"Eri2",532.723413496962,-0.0402495217270029,0.164821373376712,-0.244200863652614,0.807075258213452,0.87716574050423,-0.00527507489609827  
"Chst15",1584.66922074238,-0.767759682231731,0.138268346208523,-5.55267856515671,2.81325098393258e-08,1.75735172875028e-06,-10.174122963144  
"Oat",7626.06077171353,0.202459914066158,0.176048959625662,1.15002050848045,0.250135424494028,0.389828191734038,0.190727194194071  
"Acsm3",19280.3548019459,1.77923931764267,0.630420749849397,2.82230449754028,0.00476798827872135,0.0191485551922778,7.03783096290926  
"Thumpd1",1763.16206634144,-0.457802549912719,0.20955287815597,-2.18466362257252,0.0289135192931638,0.076503704597382,-1.17674305096546  
"Acsm2",115980.612752769,2.16030530341336,0.899428531398059,2.40186432606871,0.0163117570144785,0.0492332257381273,6.50508230275898  
"Lhpp",422.37694443425,-0.870296583688521,0.218977214352163,-3.97437051276438,7.05656399905925e-05,0.000755567736703225,-6.25572763202762  
"Gp2",200.402933774158,1.44967487189669,0.608667308166039,2.3817196232613,0.0172320119031002,0.0513431797198421,4.30440821991602  
"Fam53b",1659.1943070899,-0.700325514685197,0.231416818577048,-3.02625158789845,0.00247606184042112,0.011740820468028,-3.11272531611251  
"Eef1akmt2",597.333151651469,-0.221804127373445,0.161102307586832,-1.37679050471636,0.168577027366543,0.292560291908577,-0.272616016625011  
"Umod",63880.7818143256,2.13305759558903,0.607022764799707,3.51396639348913,0.000441468661480534,0.00313009307692634,12.3006873192556  
"Abraxas2",1566.02120786217,0.0415639166397843,0.0820017115199383,0.50686645277737,0.612248525593673,0.73173191136267,0.0129821183384514  
"Trim21",710.8713603482,-0.562633526072638,0.222346988787077,-2.53043015847372,0.0113922762937589,0.0375404095277525,-1.84675303067744  
"Zranb1",4029.57443980333,0.386547859987257,0.191607808154481,2.01739095974424,0.0436547299412377,0.104902628098873,0.871558238616285  
"Pdilt",168.38427249381,1.75360161625686,0.528214888664144,3.31986404376393,0.000900612964893219,0.00543594278428342,9.14454546778471  
"Ctbp2",2257.52145265725,0.155549575677343,0.191918892456558,0.810496422141204,0.417654920543275,0.560907347617129,0.0899386935489942  
"Acsm5",2338.74338449175,2.09544241855957,0.565261774655464,3.70703010978723,0.000209704018802206,0.00175636123651435,13.2945576616893  
"Rrm1",1166.8721338726,-0.39383547995577,0.179361102152766,-2.1957686211157,0.0281085087030595,0.0747963798883041,-1.02120980406365  
"Uros",1337.21163295004,0.25425205044729,0.231622610019137,1.09769961760764,0.272335676805142,0.414941081999427,0.223644868235506

"Knop1",4444.6917621738,0.706656437384142,0.249956520458536,2.82711743  
66158,0.00469690994430571,0.018922597200762,2.80358765578209  
"Mmp21",0.215137371833175,1.59126336803356,4.75777103092869,0.33445564  
2713632,0.738035757496647,NA,NA  
"Vps35l",2115.18033393058,0.370455114233651,0.172830401309566,2.143460  
36013715,0.032076150796241,0.0827057376653143,0.92334688792445  
"Bccip",3757.35398256694,0.308930184026875,0.147243627742643,2.0980886  
491525,0.0358973150773462,0.0902198826215645,0.74313324073672  
"Dhx32",1384.25968578935,-0.633285294790776,0.303352048546356,-2.08762  
491575527,0.0368316826491006,0.0920225715392315,-1.51084227325261  
"Stim1",1910.39841042504,-1.15512983816908,0.20919106273774,-5.5218890  
4751276,3.35374253384602e-08,1.99474571569132e-06,-15.1610721681054  
"Pgap2",1200.20411493348,-0.622182573906064,0.140719176140745,-4.42144  
83837211,9.80414863099098e-06,0.000168275783456921,-5.40670830374388  
"D7Ert443e",32.366343716499,-0.224716377034794,0.551866109950941,-0.4  
07193652559623,0.683865763188047,0.787457311205371,-0.0536951058861487  
"Art1",0.166770394071505,-0.542540875129236,4.78471990596014,-0.113390  
31036141,0.909721121378941,NA,NA  
"Mki67",1092.66373600583,-0.668508608569072,0.436916607253044,-1.53005  
9964468,0.126001886869159,0.234941645804233,-0.968279976278325  
"Atp6ap2",4702.67539527056,0.221331742690313,0.280064472806224,0.79028  
8537751991,0.429359279305206,0.571990108492273,0.123643343918983  
"Usp9x",7128.77299462169,-0.320170045179108,0.151653711514477,-2.11119  
162189805,0.0347558446701953,0.0879176776569108,-0.778446842815135  
"Cask",1285.40710137243,-0.272087252560884,0.192054413356748,-1.416719  
60464388,0.156564922893274,0.27711536552043,-0.349175387750135  
"Swap70",2298.80449618018,-0.607344593092023,0.183766489033442,-3.3049  
8012062198,0.000949831367605642,0.00564456324461287,-3.14426088995051  
"Wee1",586.838826211314,0.436223963153645,0.184716268008832,2.36158930  
589041,0.0181967884974727,0.0534338828499583,1.27783531519085  
"Tmem9b",2475.88275868832,-0.0456892145309184,0.20688084400815,-0.2208  
47970482557,0.825210810592806,0.888212000272621,-0.00541621996096035  
"BC051019",3.57193615263202,-1.41032625581477,1.24757694290412,-1.1304  
5232507408,0.258285676472238,0.399338206316366,-1.29460417202918  
"Akip1",834.857011218886,0.445424878594468,0.198528974413843,2.2436265  
5330078,0.0248564393205205,0.0681167749643722,1.19664808649274  
"St5",2605.39595155632,-0.250607050821152,0.255646246141013,-0.9802884  
04794018,0.32694377669326,0.471749408566948,-0.188282918851411  
"Trim66",12.7038546382824,-1.661947092355,0.831402343564515,-1.9989684  
9608295,0.0456117626353245,0.108291569422451,-3.69438868069896  
"Stk33",7.89083937677454,-1.63981671262402,0.903609785108909,-1.814739  
87958904,0.0695638933853083,0.149362051891503,-3.117918049475  
"Tub",34.9698531765272,-0.836872476904669,0.451824902270235,-1.8522052  
9612185,0.0639963485708015,0.140029267695375,-1.64521080192361  
"Eif3f",5154.38823062012,-0.228675396626386,0.184024505895664,-1.24263  
556917815,0.214002156469686,0.348705837108971,-0.240915609866697  
"Ndufb11",7439.46162538284,0.646495641247849,0.326866164449111,1.97786  
039536222,0.0479444578993539,0.112751301425836,1.41102248181793  
"Rbm10",2980.87269928872,0.261444892608225,0.146746440868987,1.7816097  
6893224,0.0748128902670732,0.157902331070296,0.482569386516021

"Cdk16",5435.50307594919,-0.0352767576410432,0.15516270767435,-0.22735  
3325871839,0.820149010517941,0.88465228782008,-0.00432354080465287  
"Usp11",1022.41788211773,-0.614389227099613,0.178390372745439,-3.44407  
165949667,0.000573023805875806,0.00382630759142687,-3.41960136152372  
"Glr3",3801.47580735169,-0.383147340428908,0.354807966977446,-1.07987  
242702829,0.280198993228106,0.424072030579958,-0.328683694938624  
"Mrgprf",132.020667374767,-0.928217290437087,0.261466073927481,-3.5500  
4867933472,0.000385159923547382,0.00280913468248173,-5.45316406767969  
"LT01",1116.522196965,-0.13851037519431,0.104634014620149,-1.323760496  
97741,0.185582599444914,0.314070691728827,-0.1604140160926  
"Fgf15",0.693865130813784,0,4.28809205650332,0,1,NA,NA  
"Fgf3",0.738994073664182,-2.51013608827861,2.25122312170634,-1.1150099  
0909156,0.264846175446164,NA,NA  
"Ano1",2123.09304619582,-1.62678094968146,0.292441639630411,-5.5627541  
677628,2.65549851931461e-08,1.7031878332104e-06,-21.6085457790921  
"Fadd",655.198968677032,-0.233791396659996,0.205739092619476,-1.136348  
92466647,0.255810562570354,0.396612146071626,-0.216209450835727  
"Cttn",7548.81780875697,-0.236065543174104,0.0996843308417241,-2.36813  
089059024,0.0178782096772117,0.0527127373788407,-0.694716851854568  
"Zfp300",61.1101312958488,-0.620248162245654,0.228703215123728,-2.7120  
2204966861,0.00668741442258115,0.0248838180174594,-2.29090988724319  
"Slc6a14",14.3143663921846,2.09470637406322,0.680601910412147,3.077726  
26261767,0.00208586422647197,0.010306752365993,9.58318955505657  
"Nadsyn1",1075.35812381402,0.852305328667216,0.237512783651405,3.58846  
086330299,0.000332635913826636,0.00250801819326827,5.10382795480451  
"Dock11",486.593380350563,-1.12346974722289,0.33272182098772,-3.376603  
74630001,0.000733866902140941,0.00463620638581795,-6.0373678285595  
"Cul4b",1224.78532835239,-0.0206187724375546,0.230698211893566,-0.0893  
755190745353,0.928783478544973,0.956146793277185,-0.000924624690227363  
"Tnni2",214.790368842606,-2.06420176590738,0.419355342939615,-4.922321  
36936099,8.55236178356561e-07,2.45587555310696e-05,-21.9103501817011  
"Syt8",1068.61755117467,-3.05974531070948,0.832285532216722,-3.6763168  
3150866,0.000236625614479252,0.00192720393948055,-19.1285640540734  
"Smarca1",146.590597547278,-0.833944633651618,0.25507989465531,-3.2693  
4678555724,0.00107796098598812,0.0062312728445883,-4.23491650489175  
"Sash3",517.903188289722,-1.38451250289929,0.392107983573855,-3.530946  
9862873,0.000414074730260233,0.00297809999653782,-8.05297511495761  
"Elf4",896.242475723102,-1.30554380301774,0.234655960705074,-5.5636507  
1270706,2.64188487096469e-08,1.70004855491979e-06,-17.3439584815553  
"Rab33a",17.3612499088108,-0.273451410301047,0.407691848985095,-0.6707  
3062898308,0.502392147029794,0.63732219146304,-0.123184379336822  
"Slc25a14",282.659514748677,-0.0200203852669815,0.178535505795926,-0.1  
12136715762666,0.910715006035462,0.945169934243248,-0.0011289603974528  
8  
"Rbm2",455.859267320245,0.131484209899589,0.209115800991028,0.6287626  
72531044,0.529504440868896,0.661855010172503,0.0542646858714267  
"Enox2",633.639144559809,-0.291275097097288,0.211311569594083,-1.37841  
528344524,0.168075107339727,0.291845083525691,-0.358714647550908  
"Igsf1",10.2249267113897,-0.986209385931256,0.693699839626184,-1.42166  
58698706,0.155123272648791,0.275088091869588,-1.27286485082311

"Stk26",398.162527420231,-0.810469405982644,0.260003313978977,-3.11715  
029158504,0.00182608453233283,0.00931092997160711,-3.79021391374667  
"Gpc4",4680.33438958269,1.01731958835063,0.250737250563521,4.057313327  
25492,4.96404655078904e-05,0.000575782151381824,7.58898151740659  
"3830403N18Rik",9.05122246206231,-2.22160917399529,0.800548909698797,-  
2.77510736331046,0.00551834872623955,0.0213825046630005,-8.54249211881  
543  
"Slc9a9",346.403317001713,-1.23384671747987,0.283275627634353,-4.35564  
022144713,1.32678548768471e-05,0.000211526275052137,-10.4397761395893  
"Vgll1",3.29392779645023,-0.225438919641133,1.07940025081212,-0.208855  
722862318,0.834560869870043,0.894228050817502,-0.0252028191143123  
"Cd40lg",25.6709753417945,-2.02760105238904,0.677832576333433,-2.99130  
068866982,0.00277791812067074,0.0127684694759166,-8.84191495822455  
"Arhgef6",1236.59049708148,-0.87153571083101,0.206883801384135,-4.2126  
8221581434,2.52355988277863e-05,0.000344568421529536,-6.94894410927034  
"RbmX",3217.79449449136,0.195124875102529,0.145462197247177,1.34141294  
986052,0.179786415391327,0.307201430838673,0.230296449950155  
"Fgf13",21.9758705110992,-0.485766766587036,0.393597824753793,-1.23417  
035368754,0.217139432023238,0.352492269218975,-0.506521923215334  
"F9",5.89361832073395,-0.793279192572644,0.636091810884792,-1.24711429  
859348,0.212355590810881,0.346646959322388,-0.840438391346144  
"Mcf2",6.77303823907837,0.0748532892990661,0.610103140312649,0.1226895  
65670335,0.902352926827283,0.940206133024014,0.00461516468295214  
"Cacna1f",11.062140212688,-0.762594107364166,0.64838753369661,-1.17613  
937303273,0.239539186496501,0.377783309739447,-0.742335415430154  
"Ccdc22",1769.43967743369,0.440784888387143,0.156998033230972,2.807582  
2309103,0.00499149343122959,0.019870823860434,1.72721680204182  
"Syp",692.461420345567,-0.294570432086916,0.152031749251264,-1.9375586  
5822525,0.0526770903953465,0.120977374384978,-0.62217745051521  
"Prickle3",787.212278688109,-0.429120595946685,0.181886275419783,-2.35  
927969252381,0.0183104494102587,0.0536625796785246,-1.2551946335986  
"Plp2",3006.10278743507,-0.464200053102238,0.179889340340241,-2.580475  
59807743,0.00986643289613589,0.0334074657364515,-1.5778047834944  
"Magix",353.996087081889,0.9466305262461,0.286650128254174,3.302390032  
09766,0.000958646688427158,0.00568309307721275,4.89432560253439  
"Gpkow",1663.58051043897,-0.135511850939054,0.122923015825488,-1.10241  
235157651,0.270282444147521,0.412715725271232,-0.119927478496097  
"PraF2",788.078574342997,-0.777979035922406,0.176227093415114,-4.41463  
920697952,1.01178591717088e-05,0.000172747826733781,-6.7401596057675  
"Ccdc120",754.632192230703,-0.227074797765803,0.266640127884644,-0.851  
615244739314,0.394427675580439,0.538742614253408,-0.140449701416668  
"Gripap1",3002.69037624224,0.295686709421849,0.147985530437305,1.99807  
851854218,0.0457081482407203,0.108447003455532,0.656866154095536  
"Otud5",5095.48946364476,-0.0421610661092595,0.174238892097773,-0.2419  
72762806602,0.808801268301511,0.878121647011892,-0.00547967986784957  
"Pim2",472.130916175714,0.0581429778001297,0.198267501405399,0.2932552  
10198288,0.769327086414307,0.850807928113535,0.0093940956447292  
"Slc35a2",1368.5951713115,-0.0054240155527919,0.154495898178058,-0.035  
1078288599008,0.971993758734667,0.982933162585371,-9.33698414506512e-0

"Pqbp1",1443.85153442291,-0.111377316558901,0.110226350672109,-1.01044  
183972139,0.312283650895196,0.457374760062674,-0.0871251487074149  
"Timm17b",1582.26746499427,0.558909272568183,0.180427685941808,3.09769  
129748992,0.00195034474741786,0.00980351170022,2.58496355729263  
"Eras",0.163104059883235,0.4033283383319,4.78471990596623,0.0842950781  
359167,0.932821825554686,NA,NA  
"Hdac6",3788.08159791087,0.688128165380845,0.238906212674023,2.8803276  
3015571,0.00397262111143098,0.0167151848145622,2.81543351989653  
"Gata1",2.18761699429034,-0.669019297905822,1.31521970046494,-0.508674  
936719179,0.610980093076054,0.730717650419977,-0.209890183289156  
"Glod5",964.149640438143,2.09513828079679,0.689888737605588,3.03692199  
421668,0.00239007298572299,0.0114406469888881,9.36648903532461  
"Was",382.603973946214,-1.1073538475413,0.39748205001287,-2.7859216472  
9311,0.00533757716878815,0.0209072208777343,-4.28286893845845  
"Wdr13",3747.05150056654,-0.0834548997156315,0.155772090901845,-0.5357  
50012935359,0.592131333506917,0.715061113632966,-0.0279897106773239  
"Rbm3",8367.4019944936,0.0067892450166736,0.204434505116936,0.03320987  
82091123,0.973507220797044,0.983749354293898,0.000111235911130205  
"Ebp",2482.52952405719,0.982692107275704,0.190778557417494,5.150956798  
17524,2.59160887806102e-07,9.44508222512782e-06,11.3697637495429  
"Porcn",389.98726438044,0.0503350642325888,0.205717181745005,0.2446808  
95419718,0.806703521720975,0.877006148119073,0.00660603806933093  
"Slc38a5",0.568340198278774,-0.211842184148549,1.99760906363564,-0.106  
047868927365,0.91554437237708,NA,NA  
"Ftsj1",807.90732888511,0.205908923455943,0.169721654973631,1.21321538  
779441,0.225047482440382,0.361051289463199,0.209766679574843  
"Otc",3.43534500120076,2.23466352158494,1.00226008486513,2.22962438126  
591,0.025772389840216,0.0701144212508066,5.93890162399654  
"Rpgr",431.617356058373,0.319685733705059,0.149806416066844,2.13399226  
881186,0.0328434136831294,0.0843050131639887,0.790683184023066  
"Dynlt3",4593.93094681539,0.013860003467745,0.236944431634361,0.058494  
7422994643,0.953354550362935,0.970983442487281,0.000408119761316209  
"3830417A13Rik",2.74111205853951,-3.99169455697013,2.16510737607163,-1  
.84364738723152,0.0652345452201339,0.142124751804153,-7.78799595770347  
"Aff2",10.409510373296,-0.423187322666331,0.57146201566165,-0.74053447  
3102918,0.458975751646112,0.598649428034514,-0.217128576673463  
"F8",242.281497646669,-0.236320522856379,0.283770548483634,-0.83278734  
9212911,0.404964670768567,0.548714464951044,-0.14183415970793  
"Vbp1",1610.23129158156,0.00753725427081616,0.221493347604978,0.034029  
2579994703,0.972853819697094,0.983343897172314,0.000126598552873519  
"Fundc2",2748.20592754524,0.0820669692861726,0.261181428014093,0.31421  
4413751289,0.753358196091657,0.839720296103966,0.0143359853458336  
"Mtcp1",378.846790999096,-0.0565476528011361,0.2312715834881,-0.244507  
569621262,0.80683774014842,0.877024383612742,-0.0074202103448148  
"Brcc3",1363.13498519423,0.261620696406587,0.111039564580643,2.3561034  
0687696,0.0184677759630658,0.0540424276944105,0.763405488316827  
"Rab39b",47.8760511289025,0.172987601251363,0.297811539070322,0.580862  
654923911,0.561333023501243,0.689516725650283,0.064310618707425  
"Asb12",1.81582278093592,-4.6090211409563,1.86985949937196,-2.46490238  
571634,0.013705058259201,0.0432326849923801,-14.4776658080517



"Msn",11659.5020346944,-0.775613768490715,0.227785642286372,-3.4050160  
5239726,0.000661601646229549,0.004278576748983,-4.23030209260171  
"Heph",685.740291482537,-0.908945694685679,0.273374072081832,-3.324915  
51873871,0.00088445330599935,0.00536394107632203,-4.75201926423114  
"Gpr165",2.85768724945636,-2.37734040712942,1.54072586950906,-1.543000  
25343699,0.122830714427279,0.230505608267862,-3.48869970501362  
"Ophn1",905.982327524567,-1.38702381544159,0.407426849356132,-3.404350  
54202623,0.000663215829134098,0.00428191464783333,-7.56393328928618  
"Stard8",2610.81585932611,0.443988808614862,0.194295934034983,2.285116  
3140394,0.0223060084587637,0.0626599269455372,1.22986372224147  
"Efnb1",2334.88536687087,-0.986930509023832,0.144380504455763,-6.83562  
169798501,8.16501495703758e-12,3.46090133983301e-09,-19.2271203959271  
"Awat2",40.0610778910906,0.315127377450006,0.300670285407674,1.0480828  
7597402,0.294600425102415,0.438850873912972,0.25953752736099  
"Igbp1",2864.33349390632,0.378464703495533,0.212300288944936,1.7826857  
6729867,0.0746374694702013,0.157651541515544,0.699163625872053  
"Magee2",3.04525397874006,-2.60158049064432,1.25900266674027,-2.066382  
03347112,0.0387924210286092,0.0957799955952669,-6.10253107730939  
"Pbdc1",876.782043084177,0.144805669952511,0.134447741255226,1.0770405  
556879,0.28146214782971,0.425452634466881,0.123751165124797  
"Magee1",325.18084368577,-0.731339917380522,0.213353068913555,-3.42783  
87515337,0.000608406718668436,0.00400767371641796,-4.03666309178847  
"Atrx",6886.50087606761,0.456214088077094,0.273018835109963,1.67099858  
840635,0.0947219566302714,0.189443913260543,0.758986165608058  
"Fgf16",9.34590168522448,-0.104369200192967,0.561619723166324,-0.18583  
6066448219,0.852573320215344,0.90617957840098,-0.0102822221564391  
"Cox7b",9353.93207062866,0.971123219189559,0.327282002361982,2.9672368  
5439773,0.00300489378347186,0.0135529537335495,4.17694737974504  
"Magt1",6810.75923440154,0.772746930659978,0.160489738590762,4.8149304  
5876552,1.4725116033216e-06,3.72870535604734e-05,7.87959565284765  
"Pkg2",0.117622969735108,-0.976778180958925,4.78226736430637,-0.204250  
015013662,0.838158128732496,NA,NA  
"Itm2a",166.148818658456,-1.99119932366673,0.589193366814106,-3.379534  
52265351,0.000726086877784487,0.00459799998150111,-10.7169012952739  
"2610002M06Rik",879.231070988922,-0.178710657338188,0.157596271945563,  
-1.13397769586781,0.256803903983352,0.397678569360546,-0.1647911013118  
96  
"Hmgn5",3029.3215444208,0.875768513950806,0.232544538357622,3.76602486  
618711,0.000165867279815609,0.00146803459911245,5.7133655876334  
"Sh3bgrl",5912.61974894167,-0.988839520232875,0.234368282928643,-4.219  
16953896847,2.4520383892645e-05,0.000336452107768327,-7.90780377595705  
"Tnmd",4.79248130614867,-0.367304119400922,1.02864864381813,-0.3570744  
21483284,0.721036092623336,0.815615346868353,-0.074861142846205  
"SrpX2",363.857912064188,-0.536642753162168,0.304501873970642,-1.76236  
272757358,0.0780080318422218,0.163162476384857,-0.972938026963486  
"Sytl4",307.900651985022,-0.343190132979176,0.15562898028459,-2.205181  
4022787,0.0274413676913841,0.073546637422214,-0.895669809882664  
"Cstf2",1229.70799493653,-0.31881241743381,0.15631654675325,-2.0395308  
3698212,0.0413970768183197,0.100480543234607,-0.73256435762798  
"Nox1",4.00476454893547,-1.43884588296765,0.953464378309078,-1.5090714

6160968,0.131280521656399,0.241778370761922,-2.04277812691869  
"Xkrx",91.5320888296348,-0.480280549222717,0.39651818935483,-1.2112446  
8464908,0.22580164170922,0.361863846560386,-0.488199055850586  
"Cenpi",96.2943100382589,-0.398970695864122,0.332626650181136,-1.19945  
499149529,0.230351075766842,0.367123203801038,-0.399791690614114  
"Btk",316.098682603274,-1.00238742060984,0.442388994223772,-2.26585071  
893269,0.023460524803421,0.0650782212948342,-2.73868815587514  
"Gla",440.981012543885,-0.436447867024396,0.148447668446837,-2.9400789  
6244392,0.00328128614088424,0.0144551552586898,-1.84910049504215  
"Serpina7",21.415727610702,2.00268997798074,0.615215185621411,3.255267  
46541194,0.00113285623145923,0.00646995629788872,10.0947309152862  
"Col4a6",473.966354834586,-1.2353470446884,0.263374787639336,-4.690452  
93120495,2.72600935241923e-06,6.10939429350232e-05,-11.9866932290253  
"Col4a5",2738.16205966216,0.0920003617700278,0.201018669572337,0.45767  
0732602879,0.647189017906803,0.759641388686132,0.0252917103466668  
"Acsl4",2166.97673550504,-0.425007086676951,0.167165276040336,-2.54243  
642426312,0.0110082625654565,0.0365467569387485,-1.40641765208977  
"Chrdl1",320.043012091701,-0.917025112392775,0.709490223250746,-1.2925  
1268353092,0.196179656381172,0.326960504326873,-1.02515695132558  
"Pak3",202.557413117449,-0.760091954939643,0.302437901057045,-2.513216  
60507185,0.0119635854953677,0.0388841456890613,-2.4681467879243  
"Dcx",8.02151556746095,-0.0439923508141702,1.05860672440215,-0.0415568  
405150788,0.966851979776666,0.979820926114828,-0.000896803976506628  
"Glt28d2",197.965692022667,0.509500934304979,0.220523963988235,2.31041  
073763829,0.02086542518587,0.0593918336166561,1.43862609589621  
"Il13ra2",1.45690344407661,-0.878538049872125,2.05821011164,-0.4268456  
58226846,0.669491748220631,0.776320632881409,-0.222436747890025  
"Lrch2",111.974795652362,-1.17558176868645,0.31516329196612,-3.7300719  
9332347,0.000191425065650899,0.00163845738808658,-7.54018157817966  
"Cdkl5",440.164884954621,0.397397503838339,0.13171755078254,3.01704291  
855855,0.00255253669217788,0.0120215846434986,1.75691484024163  
"Rs1",0.717786344179441,-3.09647403642828,2.21750127895659,-1.39637981  
985078,0.162600148732861,NA,NA  
"Phka2",1205.85080843373,-0.597406212265773,0.345812115912086,-1.72754  
563757867,0.0840697163382241,0.172710075773121,-1.04912951487443  
"Slc7a3",108.415768386077,-0.70318843210355,0.235521317496722,-2.98566  
787744527,0.00282959776117215,0.0129334511204862,-3.05741985545104  
"Adgrg2",719.258419120553,-1.6188279923038,0.293497043024619,-5.515653  
49899627,3.47486298071504e-08,2.02247398202931e-06,-21.2247598503457  
"Pdha1",19597.4018860193,-0.500053224462386,0.536751425428013,-0.93162  
9057274765,0.351528260997358,0.496601799226669,-0.350020646767845  
"Nlgn3",139.618269934137,-1.28893415760613,0.33818183749771,-3.8113642  
2684099,0.000138201957604038,0.00128003966800037,-8.5854154006123  
"Map3k15",947.545305638564,1.76196113633741,0.441305685913924,3.992609  
18809253,6.53502250272123e-05,0.000711569972138382,12.7707591576339  
"Il2rg",1200.30946925549,-1.35487021698515,0.346629297973631,-3.908700  
80776675,9.27937987891345e-05,0.000932625509685848,-9.45361618013112  
"Rps6ka3",3000.46605110953,-0.677918766135519,0.175921652804974,-3.853  
52658599142,0.000116428614565463,0.00112049493542002,-4.60576978236162  
"Zmym3",2472.58608663269,-0.124323472584377,0.178523692810751,-0.69639

7607661911,0.486179860844955,0.62312068144054,-0.0588068759350506  
"Nono",8754.84898530795,-0.235425764587088,0.110694661004086,-2.126803  
24824698,0.033436434309929,0.0854111877603819,-0.579212872223292  
"Itgb1bp2",12.559394291975,0.0643618068263458,0.549164014481805,0.1171  
99607274118,0.906701878125136,0.943048212742681,0.00377403930509554  
"Taf1",2069.73667479147,-0.27838885971071,0.159438395184932,-1.7460590  
9315512,0.0808006840254683,0.16754888259419,-0.497336167374971  
"Rps4x",22519.5003864195,-0.667510440662574,0.261946850062229,-2.54826  
672091685,0.0108259664714542,0.0360581985412392,-2.21788422102396  
"Dmrtc1a",15.4140822676095,-0.115694187626338,0.687092797774197,-0.168  
382186512685,0.866282621122149,0.915936150243461,-0.0101589471555466  
"Cdx4",4.49936158041728,-2.77757019575294,1.64665295116856,-1.68679756  
944644,0.0916422829939133,0.184724618403321,-4.69100806160348  
"Chic1",658.872287396236,0.654712078440173,0.247457943841573,2.6457509  
0326998,0.00815098141892198,0.0288978722602396,2.32029129821116  
"Flna",19915.3680478651,-1.33480298961018,0.187215522304817,-7.1297666  
6238658,1.0053921908213e-12,8.16797372359737e-10,-27.9315935716758  
"Tsx",15.5266440812506,0.703549629593321,0.542336758064056,1.297256029  
82312,0.194543107983145,0.325010840498275,0.790717136415195  
"Zcchc13",6.58718922779573,0.017015046198192,0.59250529699043,0.028717  
1208166714,0.977090201561746,0.985429304818234,0.000249744981660882  
"Abcb7",1926.18357383701,0.465356923524655,0.170612774066749,2.7275620  
2500167,0.0063804261062877,0.0239779863672454,1.73606942919583  
"Mtm1",626.896658772769,0.161604946670077,0.167156386851441,0.96678894  
3659703,0.333649552691862,0.478380688167213,0.119159156083647  
"Gabre",351.71763915943,0.172112185531369,0.243485739251391,0.70686762  
2147137,0.479648746534042,0.617021261458122,0.0831046779415346  
"Gpm6b",1195.35597817658,-0.907182160097255,0.205402928641126,-4.41659  
798182457,1.00266461584987e-05,0.000171490830524918,-7.86615905521538  
"Gabra3",696.754688774011,-1.38049421172584,0.301580429850769,-4.57753  
247586041,4.70492764962423e-06,9.4573896198323e-05,-12.7918375306282  
"Gabraq",6.23553388716812,-1.28444529319525,0.859774356223412,-1.493933  
01149062,0.135193129095298,0.24739517889255,-1.79407247672317  
"Cetn2",2397.31550693375,0.666048155397275,0.17569302677451,3.79097661  
202058,0.000150056085496897,0.00136337071529287,4.39444930828981  
"Nsdl",2204.24187950282,-0.407615705857082,0.397571747430205,-1.02526  
326000728,0.305238986397732,0.449916416661541,-0.325559996106071  
"Zfp185",869.571943284418,-0.229635416289388,0.138730584122817,-1.6552  
6165510911,0.0978714334752192,0.194050967042894,-0.376518136665229  
"Hccs",869.774692342928,-0.262515042566078,0.214411924848157,-1.224349  
07830797,0.220820570107366,0.356597604435433,-0.270691675085234  
"Rbbp7",4810.77059884634,-0.403793235962989,0.188635868631729,-2.14059  
626566202,0.0323066102040178,0.0832229205651921,-1.00392385907422  
"Amelx",0.118013966992314,0.4.78471990596623,0,1,NA,NA  
"Arhgap6",476.067707886589,0.207050300216815,0.221088064920764,0.93650  
6004026133,0.349012722730084,0.49398817470247,0.14602091979652  
"Syap1",2946.04472436053,-0.480809164265747,0.293580623779259,-1.63774  
147651946,0.101475634461232,0.199553395937983,-0.774907354780205  
"Msl3",1522.30453988678,0.31526457972093,0.0969583748286803,3.25154562  
747142,0.00114779350988844,0.00653612086910186,1.58591054491478

"Ctps2",1591.07773533384,0.252268948060244,0.120733160208454,2.08947523302366,0.036664965139616,0.0917353381614567,0.602632072861863  
"Xlr4c",88.6563689576948,-1.19625131387817,0.496884613522331,-2.40750323379536,0.0160620199547901,0.0486602338530914,-3.61613988538948  
"Grpr",0.802980540204741,-0.875234030546609,2.60331058171526,-0.336200389109907,0.736719759501976,NA,NA  
"Zfp275",728.086248434569,-0.877461032761459,0.16972795460851,-5.16980856091377,2.34333921522157e-07,8.76975585765647e-06,-10.2173331531242  
"Ap1s2",942.293132183917,-0.837661860973065,0.231992684726395,-3.61072532076163,0.000305341904731848,0.00233839609523235,-5.07479848745395  
"Zrsr2",2103.33165949594,0.502482301871366,0.303894367234189,1.65347685264643,0.0982338532311113,0.194650779502054,0.822336506809912  
"Haus7",670.462673141344,0.529113912446983,0.232221001688594,2.27849293819049,0.0226972247676132,0.0634571965183428,1.45897323693645  
"Trex2",4.22792534721652,-1.50662260701908,1.22508424610105,-1.22981142873565,0.218767727479919,0.354250739174774,-1.56349808324653  
"Car5b",3768.79260914014,-1.05987224654726,0.566974885160064,-1.86934602270443,0.0615746890246231,0.136228672030194,-2.11277095050697  
"Zfp92",5.73870590314144,-2.08777221283794,0.821639006979279,-2.54098478176389,0.0110540730820391,0.036686351821889,-6.90081888176367  
"Bgn",21702.6205205937,-1.51235949030279,0.425183353426291,-3.55695837599384,0.000375173573809289,0.00275108474694754,-8.91650857591106  
"Atp2b3",1.27392464675057,-1.30393807085489,1.45612337453127,-0.895485982617804,0.370527355673966,NA,NA  
"Bmx",122.546242001995,-0.251308798063164,0.260868966259442,-0.963352604438312,0.335370602639119,0.479895775117426,-0.184507485109088  
"Abcd1",1079.51727623578,-0.717487294647437,0.161210806504567,-4.45061537873461,8.56245754731601e-06,0.000150813728326619,-6.31350438733665  
"Pir",207.571010991051,-1.76098861413075,0.391200000388011,-4.50150463288373,6.74740941228373e-06,0.000124466403709279,-15.8338846206049  
"Vegfd",646.733027460607,-0.886207512115865,0.24364079224045,-3.63735277646471,0.000275454543595517,0.00216042344771737,-5.43905521324868  
"Piga",1030.59251246605,0.846862151566103,0.22471966502871,3.76852711781103,0.000164213647710972,0.00145736809425058,5.53096099889312  
"Asb11",72.6403438901648,1.21660760201779,0.540623615472393,2.25037820620309,0.0244249472564331,0.0671665624176732,3.28554583954267  
"Dusp9",210.516439893285,2.46598832818048,0.41695529544289,5.91427511565983,3.33340323609332e-09,3.57113715919492e-07,36.608118470607  
"Asb9",819.423029287802,1.91939757386296,0.686997990025549,2.79389110554978,0.00520780120595006,0.0205176213201888,7.45968336427479  
"Plxnb3",56.694391088631,-0.6651982053318,0.371675197597789,-1.78972987606143,0.0734973470804103,0.155917422165619,-1.23622347387835  
"Hcfc1",2943.68391894706,-0.307219365554832,0.137333604760259,-2.23702979391781,0.0252843928342478,0.0690850264466397,-0.821018336854006  
"Renbp",2794.44807080714,0.942973132798514,0.355802278957789,2.65027288628015,0.00804267806006851,0.028600426192817,3.35164114583506  
"Naa10",1999.23615666025,0.190925677285993,0.14598122946777,1.3078782661448,0.19091460230278,0.320762853571702,0.217092652854795  
"Arhgap4",1752.61351791536,-0.631803953265158,0.326318594945483,-1.93615675922701,0.0528485046218589,0.121299604840142,-1.33278520854645

"Avpr2",640.917158928732,1.84395816227652,0.682380208625788,2.70224449  
503009,0.00688730963147985,0.0254709345821743,6.76772714252595  
"L1cam",2606.30954352796,-0.025429860536515,0.218464031081317,-0.11640  
2963044518,0.907333187189388,0.943127331475567,-0.00148901947884162  
"Irak1",5678.57162986928,0.0161929321319754,0.131224864217867,0.123398  
353113103,0.90179166113302,0.939872450757517,0.00100414159215962  
"Mecp2",2998.08855482768,0.0294979662072836,0.160043290631211,0.184312  
42003925,0.853768371058934,0.906934115985132,0.00288152272228085  
"Opn1mw",0.480199823535145,-1.32081674326388,2.9737678606628,-0.444155  
968169448,0.65692982432936,NA,NA  
"Tktl1",5.20703032750787,-0.271685443022347,0.795597364902016,-0.34148  
6102151441,0.732737665657455,0.825165704342674,-0.0522100793187388  
"Plxna3",581.667624417154,-0.501188778769355,0.179338279258322,-2.7946  
558918826,0.00519549845229447,0.0204732879593447,-1.94893986030476  
"Fam3a",1341.80958196445,0.256405442591407,0.0884574552206192,2.898630  
10361211,0.00374796773870718,0.0159929690089283,1.06039190995812  
"G6pdx",3085.27272598534,-1.90532438408673,0.51749560442117,-3.6818175  
223302,0.000231577141726475,0.00189957556137266,-11.9390003875856  
"Mpp1",4875.74311089946,0.61523221905817,0.253280548628423,2.429054352  
53439,0.0151382627139776,0.0464754914812055,1.88804319555968  
"Dkc1",1774.98257681602,0.0283916972915629,0.147961287771582,0.1918859  
83956784,0.847831516612452,0.902791705035749,0.0029034321249125  
"Tceal6",2.58150053884819,-3.57834307878717,2.07683615551929,-1.722978  
03525692,0.0848924971637416,0.174125174594849,-6.25487515563955  
"Nxf7",1.43125132871094,2.17842423455348,1.56217627826202,1.3944804212  
3457,0.163172577770687,0.285467826054092,2.73092914960213  
"Morf4l2",6009.73375576131,-0.605684798515481,0.129062371183906,-4.692  
96196063544,2.69277575498798e-06,6.05579488705372e-05,-5.8823561417916  
3  
"Plp1",714.811320163581,0.162845662800398,0.203672853005558,0.79954525  
3072849,0.42397431777576,0.567112015095244,0.0923658054580639  
"Zcchc18",142.9110739454,-0.519114602294844,0.346747275779336,-1.49709  
785355372,0.134367798199917,0.246359649262375,-0.72726025809119  
"Psmc10",1385.60208404496,-0.268404572483572,0.266486875774727,-1.0071  
9621445998,0.31384049187714,0.45899054235077,-0.20901353162112  
"Vsig1",101.960578436206,-1.39921757332178,0.547643973637817,-2.554976  
6649074,0.0106194916992844,0.0355465835455189,-4.66906483383985  
"Tsc22d3",5009.2546900496,0.324557127439794,0.2228121502334,1.45664016  
571724,0.145215734283357,0.261490246311129,0.435347395149279  
"Prps1",1030.45586675138,-0.280457632794823,0.323249887125754,-0.86761  
8656540214,0.385603129660558,0.530031006141808,-0.178040050504449  
"Rbm41",117.396602891773,-0.434622929971967,0.335504128666193,-1.29543  
243387145,0.195171095435723,0.32578084229139,-0.487442822674647  
"Morc4",494.901938296848,-0.574674563614841,0.405373697541991,-1.41764  
146785896,0.156295466868757,0.276738922358066,-0.738273341234652  
"Rnf128",6260.86451608509,0.868572425454899,0.228736767966026,3.797257  
5776882,0.00014630574206469,0.00133991045503866,5.74573904460034  
"Atp11a",40874.9774645197,1.14226889719112,0.364708537189339,3.1320048  
2224552,0.00173617023628631,0.00898642083013287,5.38241746271984  
"Mcf2l",971.466062070826,0.147242164105584,0.315205029065228,0.4671313

92358319,0.640405875568294,0.754023777888321,0.0415710827692476  
"F7",36.0646816866669,-1.39535655251318,0.461393082077591,-3.024225127  
58551,0.00249270871263037,0.0118025338705359,-6.19460313875971  
"F10",98.6998165758815,-1.66506617792781,0.496441429425053,-3.35400327  
054933,0.000796514213428315,0.00494757379210745,-8.8395998418924  
"Proz",204.962244001725,1.97258429449499,0.758975392195539,2.599009552  
58742,0.00934931715048223,0.0321277733169021,6.78181268220808  
"Cul4a",3903.26489852911,0.235544557979996,0.125302359456997,1.8798094  
3855118,0.0601340536483063,0.13380049960455,0.473775595232609  
"Lamp1",35012.5165659,0.351621424054643,0.290021211022274,1.2123989925  
2623,0.225359686388819,0.361443050523088,0.357827818698134  
"Adprhl1",38.7872572789095,-3.01831550166819,1.72309229757274,-1.75168  
533102956,0.0798279306082827,0.166078210734133,-5.41877111291403  
"Atp4b",8.84246098541648,-3.06162897378808,1.74997118556151,-1.7495310  
7745354,0.0801992616937522,0.166601875613124,-5.4868931334507  
"Grk1",56.5794050178139,0.185780091996362,0.26065836681897,0.712734044  
426005,0.476010345605132,0.613595776716175,0.0907385103575113  
"Gas6",16054.181759349,0.427336878063846,0.258657668239857,1.652133033  
48722,0.0985074342055929,0.195014514381222,0.69855959929633  
"1700029H14Rik",3.90226174520944,0.39119511129865,1.39520242047275,0.2  
803859178843,0.779181439834651,0.857300145384565,0.0602312134809781  
"Rasa3",1749.29271079983,-1.57969339117412,0.254651136547938,-6.203362  
8146668,5.52692201885164e-10,9.97814125218234e-08,-25.4651059695123  
"Coprs",603.946442903097,1.03023409004372,0.291898268075605,3.52942858  
083994,0.00041645809410576,0.00299193069965884,5.9875519654799  
"Myom2",1725.75722842413,-0.507296491331058,0.548761372206331,-0.92443  
9140625804,0.355257724100469,0.500379256477071,-0.351246487574521  
"Angpt2",534.700102232489,-0.309242153391329,0.307762047416595,-1.0048  
0925438064,0.314988706830992,0.460255531009493,-0.2399636980359  
"Agpat5",1189.68079857994,0.0287491443915407,0.208655468522771,0.13778  
284650327,0.890412041555592,0.932247972198407,0.00201693748253864  
"Nek3",331.343035456749,0.0485788795326245,0.20891736237656,0.23252677  
0298125,0.816128897250225,0.882553161880229,0.00606926313021716  
"Vps36",2469.60335935127,0.294031255175211,0.180492344649807,1.6290511  
1430456,0.103302198791891,0.202207235422578,0.469997843941012  
"Thsd1",341.190761930741,-0.500567543703713,0.185012918706283,-2.70558  
157345969,0.0068184899543482,0.0252750793022588,-1.8410555778849  
"Tpte",2.21797752975227,-1.34351426183314,1.74638967794891,-0.76930955  
2614321,0.441709567690216,0.583420481697862,-0.723948783540375  
"Slc25a15",4403.04959720868,1.37236909342726,0.404409783712254,3.39351  
110853374,0.000690027598411117,0.0044140938693635,7.44229268758727  
"Erln2",4609.46927854778,0.2684619369692,0.179202049025799,1.49809635  
787452,0.1341082172412,0.246010162740513,0.376486304052816  
"Plpbp",5647.47836987805,0.915259103170007,0.160727802450934,5.6944666  
026241,1.23758206992999e-08,9.35285860445541e-07,12.7060054408549  
"Adgra2",2068.46725801538,-0.990448093775788,0.279175639459218,-3.5477  
5973897419,0.000388522457695417,0.00282770096310013,-5.81223791003289  
"Brf2",361.071288850109,-0.0852621594585583,0.173245138192865,-0.49214  
7487357714,0.622615084058032,0.740499506463554,-0.0256153371479189  
"Rab11fip1",1251.2025404163,-0.850519350752255,0.239002117000797,-3.55

862684994301,0.000372798732671552,0.00273995300565272,-5.0179064065621  
5  
"Adrb3",2416.41260819572,-3.64694801366593,1.53721856339681,-2.3724329  
7765494,0.0176713688528612,0.0522450871710519,-10.7650954936674  
"Eif4ebp1",1697.09462273048,-1.50257464780786,0.465352235243247,-3.228  
89745446789,0.00124268445632253,0.00694663461278,-7.46704165463017  
"Chrna6",0.407003317994645,-1.33195359927032,4.75681738672066,-0.28000  
9403553868,0.779470290373038,NA,NA  
"Chrn3",0.592152097833988,-1.49407366301003,2.0070363435855,-0.744417  
841652493,0.456623728424507,NA,NA  
"Ggn",58.9845276200838,-0.0581104085810482,0.437136893639428,-0.132934  
120698997,0.894245481952107,0.934655502926947,-0.00392694240171248  
"Cd209a",701.956993322855,-1.68702340434246,0.462261660131704,-3.64949  
886577616,0.000262752399957351,0.00208622378014661,-10.4129826721951  
"Cd209d",14.1314120229634,-2.04210818033256,0.72748427192281,-2.807082  
24101542,0.00499924766870892,0.0198848084546076,-8.00056986266357  
"Tnfsf13b",1168.75515970487,-1.16959708840668,0.462573155950682,-2.528  
45863051201,0.011456458703743,0.0376980897343412,-3.83410984853666  
"Col4a1",17683.0119855687,-1.12793714784165,0.191183180307367,-5.89977  
186292359,3.64004531854901e-09,3.81578514091767e-07,-16.6697258129726  
"Col4a2",12165.5134381412,-0.936709422316997,0.19208995268195,-4.87641  
02923589,1.08033784464507e-06,2.95019990124503e-05,-9.7708651930757  
"Rab20",1500.29470649343,0.311212570352449,0.230963483949942,1.3474535  
6724832,0.177834198283752,0.304666654787504,0.369887665679557  
"Naxd",3095.88488567051,0.300054865585843,0.160136020727151,1.87374997  
969441,0.0609648936550973,0.135186341008426,0.600440136143186  
"Ptprn7",707.648519343856,-1.1557671042712,0.427589626923406,-2.7029820  
9193516,0.00687204487063017,0.025420438415395,-4.24421000196861  
"Ankrd10",4651.9886083172,0.332877050436683,0.216935405488313,1.534452  
38543423,0.124918398523182,0.23347957576735,0.484223155095277  
"Arhgef7",3130.20081863501,0.137498158499569,0.12650540125634,1.086895  
55650635,0.277082970316513,0.42059663333837,0.119084545385037  
"Tex29",2.34461524097061,-0.755362850176825,1.18602944313011,-0.636883  
725401716,0.524200584308164,0.657078945216366,-0.317215465548614  
"Leptol1",1772.11415817159,-0.274402511817617,0.146816794044091,-1.86  
901310305966,0.0616209914198993,0.136284719907577,-0.546886690188656  
"Dctn6",1893.32290644513,-0.0688034818100033,0.101240343844723,-0.6796  
05374666944,0.496754365592818,0.632474638913985,-0.0315199177864286  
"Gpm6a",3312.73176239619,1.90738068069323,0.590998076397394,3.22738898  
292231,0.00124925507119532,0.00697536522856995,9.47085193608978  
"Spata4",0.357315357168995,-0.834499504116438,4.75553396496656,-0.1754  
79664379246,0.86070274832574,NA,NA  
"Asb5",20.7479270926893,0.541346519478691,0.408701552372624,1.32455214  
89606,0.185319735766893,0.313714551830429,0.627567741680766  
"Vegfc",313.699359392988,-0.206797821993288,0.237278963982803,-0.87153  
8793503314,0.38346003367775,0.528164999763265,-0.132008675088238  
"Aga",1265.73098406426,0.402343898637858,0.205279621608842,1.959979736  
3448,0.049998158797766,0.116377737823147,0.865407131553018  
"Dlcl1",3986.50365510217,-1.61627232660329,0.414389426772062,-3.9003705  
7459077,9.60455610411249e-05,0.000960357102143514,-11.2301920449787

"Eri1",727.884363014326,-0.459331756393592,0.176919165241535,-2.596280  
37339256,0.00942391315418067,0.0323313009777889,-1.57629772126078  
"Tnks",2040.27605925471,-0.207252863375018,0.186205296623512,-1.113034  
20006393,0.265693741462631,0.407592177107662,-0.186006993158476  
"Dusp4",307.27985726254,-1.71728075807564,0.543202914632895,-3.1613982  
7643635,0.00157013649525242,0.00833679296210848,-8.22075465880373  
"Saraf",7499.6515429661,0.0260722861791672,0.232010785932215,0.1123753  
19424954,0.910525823603708,0.945135887384215,0.00147116956779435  
"Mrps31",1088.65087694853,0.120439793207063,0.292797941644217,0.411340  
983241647,0.680822522084051,0.785257263795684,0.029115584157912  
"Smim19",1184.79330040357,0.149249596523448,0.289420350477263,0.515684  
526942665,0.606074763210461,0.726745051278228,0.0476374188997741  
"Dkk4",0.0925025812792845,0.894916885650085,4.78471990596623,0.1870364  
20780699,0.851632077140017,NA,NA  
"Polb",1724.08457807416,-0.100715857952243,0.158094323648648,-0.637061  
822510943,0.524084574997971,0.656975764646421,-0.0423115526676123  
"Ikbkb",5287.4594144174,-0.0869691373419906,0.156040564764173,-0.55734  
9542238767,0.577288632817947,0.702444693128079,-0.0307165086886935  
"Plat",4981.41214309416,-0.907655809090962,0.428791551960568,-2.116776  
33325768,0.0342788348608015,0.0870952204998575,-2.21536388438124  
"Ap3m2",649.908947047802,-0.55344672332597,0.165080406927943,-3.352588  
79975712,0.000800595544153508,0.00496659622014161,-2.9360462343003  
"Kat6a",2447.36735869635,-0.356475845510857,0.135795459894515,-2.62509  
398906093,0.0086625051533079,0.0302419920285045,-1.24713924956541  
"Ank1",56.512418134263,-0.731376482196362,0.563451395524573,-1.2980294  
0946743,0.1942772292247,0.324655331109621,-0.822792091045757  
"Gpat4",4790.80545379526,-0.53514104434851,0.297228852544049,-1.800434  
37831865,0.0717920765609922,0.152939357830681,-1.00484171867874  
"Gins4",841.525900490231,-0.40669525403603,0.190856809139497,-2.130892  
03298362,0.0330980378915443,0.084813450231217,-1.00343966291706  
"Sfrp1",5179.00220707673,-0.0951531257046666,0.280439434617096,-0.3393  
00091068098,0.734383674050168,0.826236908055152,-0.0181622323058936  
"Ido2",352.973548367368,2.04745150016044,0.713824334749744,2.868284815  
30858,0.00412703828817064,0.0171986715608152,8.31863806366019  
"Ido1",13.156263620963,0.103668050680343,0.590629805451632,0.175521197  
412434,0.860670116190784,0.911682834002711,0.00958547131978195  
"Adam18",0.198109811992685,-0.551446265386195,4.78471990596623,-0.1152  
51524900878,0.908245759765151,NA,NA  
"Adam3",2.0995018017944,-2.69990959055501,2.20250874749519,-1.22583376  
507607,0.220261238061805,0.356107265317502,-2.78771952353703  
"Adam5",31.0606596282167,-0.807028347002692,0.423199636404844,-1.90696  
843186951,0.0565246755188979,0.127737380999939,-1.66068585061182  
"Adam9",3483.67258832974,-0.16793725843569,0.161507952157729,-1.039807  
98587355,0.298429118182137,0.442761447748844,-0.136822539568501  
"Tm2d2",2790.57682746508,0.775591085438904,0.250764145039685,3.0929106  
1254456,0.00198203825738374,0.00992527796041369,3.57754607853889  
"Plekha2",2234.5983831184,-0.83138687515754,0.191353604500684,-4.34476  
72560282,1.39423407178092e-05,0.000220476690442696,-7.00004352071635  
"Slit2",1312.13161795559,0.781391298679417,0.35253845942503,2.21647107  
652828,0.0266592566187265,0.0719648602453177,2.05629162844127



"Tenm3",313.533332936049,-1.01649065965607,0.324309084631538,-3.134326  
81298754,0.00172248897943758,0.00893458103779566,-4.79562608471292  
"Dctd",175.637532502653,-1.47126509972225,0.306566991326177,-4.7991634  
4991255,1.59329727767346e-06,3.9625140714384e-05,-14.9128118686528  
"Wwc2",4828.88896310526,0.679230110624086,0.145741816462805,4.66050257  
303766,3.15438217311058e-06,6.91057793385506e-05,6.50693764966856  
"Fgfr1",4025.69429012114,-0.323198070960906,0.143863230931585,-2.24656  
480233372,0.0246678537393445,0.0676951178338832,-0.87028876673029  
"Rwdd4a",1380.85539807678,0.319025269164285,0.169840195304664,1.878384  
96412471,0.0603285209270925,0.134095474354361,0.640986603666297  
"Plpp5",1005.45006149105,-0.358738045742577,0.151426073201712,-2.36906  
391453939,0.0178331713944405,0.0526117681720081,-1.05641734131182  
"Star",119.049019088961,-0.142561332253033,0.24720266856249,-0.5766981  
92952538,0.564143353365786,0.69210766399837,-0.0524645307231885  
"Ash2l",1799.77670790143,-0.0335416539123903,0.0756938693008523,-0.443  
122464503379,0.657677157173834,0.76708675064757,-0.0088937499945917  
"Kcnu1",28.4216090130384,-0.38770721620433,0.378325151950517,-1.024798  
94399154,0.305458064797721,0.450005390814202,-0.309582551473773  
"Tti2",796.29615422324,0.0390930909159515,0.118267143133269,0.33054904  
2449597,0.740985142502206,0.831284712802533,0.00722373580877118  
"Mak16",1270.04457940112,0.0896995314378465,0.186100550410287,0.481994  
981960506,0.629809510995831,0.745690177641287,0.0263218858663069  
"Wrn",705.586143168753,-0.208117594628404,0.201353327100475,-1.0335940  
1915695,0.301325996566548,0.446041169226735,-0.168022496216534  
"Gsr",5038.29437823957,0.583178197271913,0.206909427086172,2.818519221  
11329,0.00482457223385006,0.0193240569875942,2.30145705223963  
"Gtf2e2",780.951403594072,-0.0869415676447824,0.214438201821478,-0.405  
43880197784,0.685154994059219,0.78861582492129,-0.0206465349035483  
"Rbpm",6025.35235753147,-0.111974330273197,0.182016552948685,-0.61518  
7621450924,0.538430821660515,0.669664104148544,-0.0448993582706963  
"Frg1",1605.94021716217,0.101812074335359,0.122233967801374,0.83292783  
6399778,0.404885429355843,0.54864522215444,0.0611181213475587  
"Asah1",4152.64441059848,-0.455576089117649,0.19134063306225,-2.380968  
86075126,0.01726717151124,0.0514121255189118,-1.35209572341247  
"Pcm1",1673.91526569634,-0.178288106182674,0.126028368583404,-1.414666  
46110463,0.157166312370621,0.277826723354703,-0.228343857128953  
"Fgl1",80.379615736217,0.432745095174856,0.421707272051278,1.026174135  
12906,0.304809510752202,0.449525439879467,0.346006893279105  
"Pdgrl",207.769709386954,-2.32941247103919,0.436931230261729,-5.33130  
229588724,9.75109414661756e-08,4.47357255695881e-06,-28.6921263623005  
"Slc7a2",1878.45461152825,-1.64192123953992,0.395502795307701,-4.15147  
821714511,3.30334709935019e-05,0.000419551884686937,-12.7681104862021  
"Vps37a",2651.91772962993,0.273966851059904,0.195225999687732,1.403331  
78725231,0.160517923504408,0.282139950643554,0.346664517243094  
"Cnot7",3189.16323260141,0.179008258215668,0.100874215243683,1.7745690  
2919378,0.0759690748111714,0.159737411912889,0.32834124117917  
"Fgf20",2.80973310204484,-0.965557718705443,1.16963229852044,-0.825522  
448317177,0.409075043415088,0.552785722954286,-0.572367971657764  
"Msmo1",1908.30612762765,-0.861005653463571,0.269333020379282,-3.19680  
688335607,0.00138957924488599,0.00758086628897231,-4.20353963648535

"Klhl2",2104.51881718992,-0.193059945939608,0.266983252206435,-0.72311  
6316638213,0.469608425606199,0.607698276793034,-0.096158675345238  
"Galnt7",870.129183206858,-0.0256975317647505,0.138135474558261,-0.186  
031371354302,0.852420159939101,0.906143729064039,-0.00253268048246651  
"Sap30",2198.05541401369,1.71662189380191,0.396547228137424,4.32892168  
195161,1.498412038741e-05,0.000231139540596298,14.3723978508746  
"Scrg1",1.26722959665138,2.33663757995395,1.77804958595086,1.314157714  
39488,0.188793135237629,NA,NA  
"Hpgd",1006.77986810085,-0.94968356953427,0.187885062861173,-5.0545985  
6718884,4.3129697015883e-07,1.40861445965777e-05,-10.6082683223929  
"Ednra",445.136291107325,-1.38293719852212,0.265552329248279,-5.207776  
57057995,1.91116852858382e-07,7.40834273763962e-06,-16.3365040817896  
"Tmem184c",1128.04328120136,-0.386974570873979,0.182106498106969,-2.12  
499045831232,0.0335874090821916,0.0857182332833209,-0.950676449745607  
"Nr3c2",672.257585280477,0.331227265883838,0.220259517044888,1.5038045  
5894823,0.132631696994668,0.243783260558261,0.467519245200417  
"Iqcm",0.58610431808208,2.44676019385114,2.94334291324521,0.8312861484  
26872,0.405811997721974,NA,NA  
"Sin3b",4708.49382751711,0.217758467439576,0.139299093448938,1.5632439  
6697814,0.117995222249601,0.223561446256216,0.326217204200405  
"Sorbs2",2162.68472455391,-0.452511842351684,0.240833769676385,-1.8789  
3850168827,0.0602528909035124,0.134019035687507,-0.909446278311096  
"Irf2",1789.12876244019,0.0888891013312169,0.245485320806581,0.3620953  
83296881,0.717280753500683,0.812640333048014,0.0184415251497812  
"Casp3",1142.64194456973,-0.712845437848971,0.216294043144142,-3.29572  
385576018,0.000981684579537874,0.00578845366853226,-3.67250134867002  
"Cenpu",64.4299948758171,-0.138449661026186,0.373173000108864,-0.37100  
6640313732,0.710632585873663,0.807944418794408,-0.0295260531947201  
"Cfap97",860.651969553247,0.00440029886286448,0.112100502777384,0.0392  
531590300079,0.968688551488365,0.980658846153693,8.59406583116961e-05  
"Slc25a4",11506.7320639359,0.635770350985301,0.191926509013909,3.31257  
184977624,0.000924423777790923,0.00553265814823505,3.30415376323652  
"Ufsp2",1546.87096227203,0.461478346819841,0.112027277549262,4.1193391  
1914366,3.79960603376838e-05,0.000468002011664029,3.53817200446022  
"Anxa10",0.635487422916337,-2.03453069699547,2.56551302738638,-0.79303  
0740938452,0.427759912637714,NA,NA  
"Pdlim3",429.755915271479,-1.1079290920945,0.261898268421989,-4.230379  
60033141,2.33297286567593e-05,0.000324221703028862,-8.90119429238821  
"Lrp2bp",19.6895807680598,0.0768949396200186,0.485683444325668,0.15832  
3164024627,0.87420215608564,0.921461435796184,0.00628957176815092  
"Tlr3",956.0242359854,-0.588010977313419,0.165046936895495,-3.56268942  
867893,0.0003670748538373,0.00270901797884923,-3.47583230731968  
"Cbr4",1200.76433212292,0.00743985121723567,0.394711058361347,0.018848  
8542685437,0.984961680662857,0.990294583074532,7.25595405671896e-05  
"Sh3rf1",1536.10505005865,0.167650812600658,0.213197994597023,0.786362  
052408344,0.431655408462155,0.573740622058625,0.0931430801507655  
"Nek1",895.226224539136,0.0884488446075951,0.139612677431533,0.6335301  
79599706,0.526387479169184,0.658888301267302,0.0369009690765546  
"F11",2.25999564434558,-3.06222470397352,1.65925115875185,-1.845546219  
94481,0.0649581214908859,0.141704346926526,-5.9836252139826

"Mfap3l",3139.1526658371,1.21673947773865,0.322225813415825,3.77604595  
001355,0.000159337609360009,0.00142708530422667,7.97222448262895  
"Triml1",11.5063698760412,0.410349122544032,0.581035799723535,0.706237  
245173675,0.480040611959841,0.617443884952371,0.197856841964791  
"N4bp1",1839.44258720618,-0.255076271505421,0.121057426308754,-2.10706  
834998172,0.0351116553257744,0.0885993342231072,-0.618210742611919  
"Cbln1",3.13507617675997,2.40387479812191,1.99837439932355,1.202915128  
88456,0.229009165206185,0.365552247498174,2.41912993662376  
"Heatr3",936.177512751111,0.130539851323819,0.153992034201784,0.847705  
220600992,0.396602158204367,0.541068351572121,0.0801788383637289  
"Adcy7",2583.64748408578,-1.21699267936749,0.454742998477162,-2.676220  
81800697,0.00744575701592243,0.0270047191771681,-4.39546557439206  
"Brd7",2607.95954188045,0.223207177572154,0.144932745546752,1.54007416  
840215,0.123542275531724,0.231510367797332,0.326581256367854  
"Nkd1",849.366746901969,-1.75415822135703,0.323383009567974,-5.4243982  
1962358,5.81501126975739e-08,3.05609406301158e-06,-22.2749552332896  
"Snx20",601.842806221557,-1.38806256409493,0.38081813077268,-3.6449487  
3518377,0.000267445107643454,0.00211805227816088,-8.54665981214096  
"Sall1",1996.48416001037,0.937828025273211,0.50755531770312,1.84773559  
169321,0.0646406024715493,0.14118544494122,1.83596814422288  
"Rbl2",2081.50511918494,-0.0610163180827928,0.132580187403746,-0.46022  
1993026604,0.645356886353638,0.758044543758034,-0.0169023212662514  
"Aktip",4589.82351623003,0.628283740406012,0.158470314351772,3.9646778  
1979248,7.34951434437671e-05,0.000776698269304374,4.49879971902151  
"Eif2ak3",1596.47410276793,-0.27514829885955,0.203925172796677,-1.3492  
6107986622,0.177253122051121,0.303858042355615,-0.327755182266312  
"Gins3",192.685648025833,-0.788255890802397,0.169508563403325,-4.65024  
22944075,3.31545291011056e-06,7.15888159926198e-05,-7.52356486567616  
"Setd6",1297.81354793903,0.528115330032403,0.163707274638635,3.2259735  
0177722,0.00125544979727241,0.00700287489473674,2.62020962631946  
"Got2",8278.35117126876,1.16449155136269,0.241485947882778,4.822191773  
77541,1.41989333608749e-06,3.61424024373809e-05,11.9104705910837  
"Cdh11",2369.38741226088,-1.89930520277088,0.436671199798826,-4.349508  
74627384,1.36442842212778e-05,0.000216995313006913,-16.0218450713493  
"Smad1",1524.29526226931,-0.503276891281208,0.146277122632997,-3.44057  
14456382,0.00058048715828753,0.00386423305301818,-2.7962024071701  
"1700011L22Rik",2.52538351917862,0.638682360012125,0.951813311770917,0  
.671016418990621,0.502210069915062,0.637174124362563,0.287862001911269  
"Lsm6",1864.80167803291,0.403386107736832,0.178626951212959,2.25826004  
977219,0.0239294514160753,0.0660592444726938,1.0960820615318  
"Slc10a7",590.498231988735,-0.280790701116063,0.193583144334047,-1.450  
49147787129,0.146921513972543,0.263705777315835,-0.374271899955982  
"Pou4f2",0.14728986473751,0.4.7847199059615,0,1,NA,NA  
"Tnpo2",3711.13028976586,-0.376501912393986,0.161537324134649,-2.33074  
25352679,0.0197669398565798,0.0569215467912558,-1.07908510231149  
"Vps35",4994.55101845266,-0.0804644380071742,0.175473152154672,-0.4585  
56975919874,0.646552338650283,0.759060543051736,-0.0221819323935517  
"Orc6",602.729771671588,-0.439361041033262,0.164677997243802,-2.668000  
87678258,0.00763040589690192,0.0274598844920254,-1.57951572135662  
"Mylk3",114.810857724521,1.05487891758675,0.524920547272137,2.00959730

585639,0.0444738266373905,0.106322536162412,2.3642769220578  
"Gpt2",2317.67402776224,-0.055949446911996,0.4053293727341,-0.13803452  
3712397,0.89021313272295,0.93218988516821,-0.00392869997904771  
"Dnaja2",5464.03426947984,0.187363509896552,0.168008790170109,1.115200  
63745978,0.264764452973896,0.406550425585528,0.16863602298213  
"Itfg1",5001.01609600631,0.510265848987684,0.220699262451947,2.3120414  
7815757,0.0207753976511865,0.0591609014046527,1.44277383283572  
"Rfx1",1733.04128105021,0.028012753105968,0.183926608553571,0.15230397  
2363024,0.878947191980227,0.924555139904302,0.00219739282225306  
"Tocr",10277.9530971806,-0.0294363459532799,0.355822100007782,-0.08272  
77056502003,0.934068054454004,0.958802786298719,-0.00123838325927748  
"Tbc1d9",1391.38376279113,-1.31592461762045,0.199825290559839,-6.58537  
572463272,4.53736483492575e-11,1.30826427347887e-08,-23.886636639668  
"Ucp1",4119.60964951187,-3.43217462821199,1.59100225111472,-2.15724058  
580512,0.0309869236717286,0.0805899743565913,-8.64352345763214  
"Zfp330",1740.92769586797,-0.267375586870269,0.0806944217418853,-3.313  
43333403535,0.000921580741342027,0.00552212086499288,-1.39008387878959  
"Il15",530.451996082919,1.02445765594383,0.250578915247148,4.088363360  
23484,4.34427312277148e-05,0.000519979357567822,7.7466634255861  
"Gab1",1534.85793054889,0.133955305931849,0.0708984952546865,1.8893956  
1341388,0.0588388382406484,0.131564182111945,0.271696251706464  
"Smarca5",3251.63188635116,-0.194443958717979,0.0975143698929202,-1.99  
400312929773,0.0461517125380675,0.109240636651976,-0.430538232299938  
"Hp",4328.86280402555,-3.80476946367397,0.954251718928808,-3.987175907  
78354,6.68644504940392e-05,0.000725096249017116,-27.5054628238394  
"Txnl4b",652.237728953341,0.126028235173832,0.224532918815799,0.561290  
682179313,0.574599392577715,0.700352500873931,0.0448876653136545  
"Ces1f",16290.783114813,1.86587670277332,0.579759380805093,3.218363970  
55316,0.00128924106611667,0.00714339934843502,9.22035383873265  
"Pmfbp1",5.7355624677888,-0.894295126345535,0.714007841950888,-1.25250  
042618866,0.21038757311692,0.344196752864046,-0.953803159819494  
"Zfp821",1365.1463422462,0.274341009998069,0.249436087042861,1.0998449  
0716826,0.271399702279082,0.413903120456594,0.242002608340259  
"Ist1",6847.79257150427,0.196829741458147,0.100344074753975,1.96154822  
236129,0.049815105499104,0.116043797716845,0.423929455009496  
"Dhodh",886.880541035789,-0.0754217976865044,0.123262978475756,-0.6118  
77131472521,0.540619052939359,0.671229641760802,-0.0300664442861295  
"Ap1g1",4776.69286038935,0.547483532398803,0.112519786486519,4.8656645  
1549742,1.14072875973908e-06,3.05542200598079e-05,5.69164304347356  
"Phlpp2",933.752543474169,0.00721587605284825,0.169430369258831,0.0425  
890357461531,0.966029135768239,0.979458345928641,0.000149769608642403  
"Irx3",1973.99096206833,1.09998562326765,0.277565363411282,3.962978700  
76011,7.40203878222175e-05,0.000780556799219901,7.87095047982035  
"Irx5",207.683144033955,0.380506886466297,0.433255416193009,0.87825073  
2119612,0.379807666103377,0.524579575949823,0.245487117002993  
"Irx6",1.91129202427765,1.04277126217388,1.36061057352099,0.7663994992  
15559,0.443438630696929,0.584753579151138,0.559514304425358  
"Mmp2",1932.67719311164,-1.6296355102266,0.346888443701014,-4.69786624  
437451,2.62893495039217e-06,5.92589290898804e-05,-15.8622105669009  
"Gnao1",436.75926011808,-1.2501702116452,0.347111212873721,-3.60164167

931969,0.000316214012963301,0.00240841438467127,-7.53700951930342  
"St3gal2",975.163632071296,-0.613596038200688,0.173899461091582,-3.528  
45278731223,0.000417996503374891,0.00300047013692073,-3.56437097368111  
"Il34",2144.28535528479,-0.0822326804603064,0.376614873071649,-0.21834  
6874592662,0.827158854758068,0.88967030836677,-0.00961335599583311  
"Amfr",7484.50577974569,0.307806255066956,0.119860560846692,2.56803616  
546277,0.0102276484956018,0.0344478649796586,1.03678635077795  
"Cog4",2864.45819223174,-0.121979742505512,0.199702277319816,-0.610807  
969456283,0.541326716807717,0.671766059337886,-0.048529045911184  
"Nudt21",2367.014200288,-0.0392042150667945,0.184096551260413,-0.21295  
4641455169,0.83136234200559,0.892330627692681,-0.00446608757857304  
"Bbs2",1214.15719277327,0.707025999580967,0.203880795329804,3.46784010  
939951,0.00052465935594197,0.00359697894590595,3.9789026208657  
"Cenpn",99.6582998518575,-0.677626356585232,0.23491321365069,-2.884581  
69744698,0.00391934049862008,0.0165481379476168,-2.77927209704644  
"Cdl2",101.196767319451,0.152122255034133,0.221963768694861,0.6853472  
34499602,0.493124832081153,0.629415290384807,0.0704271278405811  
"Mt3",26.7698339327954,1.52995588752953,0.580449647063294,2.6358115562  
1358,0.00839363312186429,0.0295360149088811,5.38872635080117  
"Mt2",5178.54515654448,0.215833862213212,0.274648079530991,0.785856076  
553622,0.431951809638699,0.573992802040165,0.119817669843121  
"Mt1",6373.16813588582,0.508354687544819,0.195809451995247,2.596170319  
4857,0.00942693233618019,0.0323313009777889,1.7445306674649  
"Slc12a3",27841.2307244557,2.07390828654646,1.0643861461707,1.94845479  
153189,0.0513605692079298,0.118770599889683,4.41858889757005  
"Nudt7",1465.83089165909,-1.16416708367616,0.596721480317503,-1.950938  
79150576,0.0510643274085457,0.118290632744662,-2.48504350565188  
"Herpud1",7414.86495460557,1.08158116870023,0.203588548363172,5.312583  
52886751,1.08081857901948e-07,4.82238001229332e-06,13.2409794625591  
"Cntnap4",0.265138276062047,-1.44228574196135,3.99054174850896,-0.3614  
26050109675,0.717780977099895,NA,NA  
"Fam192a",2156.86781558942,0.0816221387524394,0.106170567953925,0.7687  
83103692741,0.442022080927329,0.583556539638503,0.0439628212990354  
"Plp",1655.1248923821,0.658742566592313,0.310726162622759,2.120009982  
52621,0.0340052034556373,0.0866031161152059,1.61156064801143  
"Arl2bp",2908.96029763209,-0.0911632354277243,0.0973261353169902,-0.93  
6677852570706,0.348924291962276,0.493961072001776,-0.0642972992660492  
"Cx3cl1",6803.09708465085,-0.740235648871235,0.432363005899479,-1.7120  
6980886643,0.0868838043935594,0.177054809580437,-1.28156697034815  
"Ccl22",349.113692957667,-1.63703667871804,0.515213362253279,-3.177395  
61636848,0.00148604172971044,0.0079842495579758,-7.90735286764095  
"Ccl17",357.16542544186,-1.52111122308125,0.63677555707333,-2.38877137  
507036,0.016904818426846,0.0505072248983518,-4.54148881701463  
"Ciapin1",2451.53287556042,0.459959801764666,0.11131787863969,4.131949  
03986131,3.59700178111301e-05,0.000450734837584457,3.54382070135073  
"Coq9",4534.94431565026,0.453725503946001,0.363351783999452,1.24872237  
849446,0.211766632880423,0.345872491866517,0.481713603609198  
"Polr2c",2270.58713322084,0.332874472406955,0.130528605170235,2.550203  
24451351,0.0107660135451871,0.0359198720232817,1.1072951481664  
"Adgrg1",12625.3516815096,0.21531410428955,0.207350506141107,1.0384064

5627855,0.299080865040491,0.443458456772585,0.175082912145818  
"Drc7",2.61715308837803,-0.444664670231466,1.63444942177881,-0.2720577  
73282166,0.785577597328548,0.861339031249622,-0.0663738002581615  
"Katnb1",836.420916925498,0.224918354121709,0.128162395310935,1.754948  
11544395,0.0792681829757041,0.165142753676705,0.405065586462641  
"Kifc3",3726.11956042347,0.634659370420672,0.235265532197716,2.6976300  
5439874,0.00698350002727251,0.0256980564619502,2.32370368470849  
"Cngb1",32.5753947814255,-0.127854968832261,0.522918098234089,-0.24450  
2856688326,0.806841389785257,0.877024383612742,-0.0167771908358689  
"Mmp15",917.728557544383,-1.47092076059663,0.328956781938902,-4.471471  
1517023,7.76833403358139e-06,0.000139344045066026,-13.0596649041213  
"Tmem38a",573.643319417714,0.548702744377163,0.119287622810594,4.59982  
965079618,4.2283657311624e-06,8.73556217361482e-05,5.12791420811823  
"Usb1",770.513775769152,-0.313044059800805,0.122869207031016,-2.547782  
86085774,0.0108409925800976,0.036083590530342,-1.03990640683205  
"Cfap20",1438.3844226349,0.0574301413502886,0.115950795621596,0.495297  
518593241,0.620390122254434,0.73848391964084,0.0174102891515721  
"Tpm4",10444.0328608008,-1.06210706587682,0.206708306734106,-5.1381924  
7352763,2.77393687138751e-07,1.00159668737618e-05,-12.2262649847479  
"B3gnt3",534.292419534358,-1.18155790381849,0.204902624543503,-5.76643  
616181519,8.09653580117856e-09,6.81317024540035e-07,-16.7772220184448  
"Jak3",2380.86285836619,-0.822159896924653,0.199599822215964,-4.119041  
2285793,3.80452078546865e-05,0.000468294357674069,-6.30301772502925  
"Pgl's",3145.46775546197,0.0598261412446436,0.267541653581722,0.2236143  
06197631,0.823057430803787,0.886628385956477,0.00719884012300955  
"Slc27a1",8912.24487065031,-1.02253334437249,0.547846476314749,-1.8664  
5965353444,0.0619770838075212,0.136800259945805,-2.0340574542516  
"1700018B08Rik",0.216724841653744,1.27584478035588,4.78429427823541,0.  
266673558555944,0.789720514083426,NA,NA  
"Map1lc3b",7289.59555346787,-0.212921122434176,0.200844646186708,-1.06  
012844492873,0.289086168664326,0.433054503829519,-0.178191916714442  
"Mvb12a",2615.02140684526,0.39728742256113,0.124882344495983,3.1812937  
542497,0.00146618878484812,0.0079059040174139,1.92292891250092  
"Mthfsd",1539.32935652998,-0.57754841861982,0.199734780022283,-2.89157  
661252281,0.00383314122448037,0.0162511195105709,-2.37926469951174  
"Cox4i1",45573.7246749315,0.556069580473585,0.387038257281446,1.436730  
27152255,0.15079464999709,0.269174593577154,0.72978297218967  
"Emc8",2031.90042876311,0.0226167533763477,0.214916763596374,0.1052349  
43044383,0.916189384110091,0.948641103041716,0.00119246235688483  
"Babam1",3232.87383685291,0.262748593023151,0.120570071619307,2.179219  
01757482,0.0293154018180137,0.0772421222496799,0.67284931534619  
"Gins2",205.28909410651,-0.928506055384624,0.398550311843672,-2.329708  
51556835,0.0198215621690042,0.0570367206569132,-2.65929704975222  
"Gse1",2248.08887193747,-0.292135626888398,0.175460019577547,-1.664969  
76115567,0.095918788849146,0.191145447231997,-0.483402850585949  
"Zdhc7",1638.94844517125,-0.0397311330237628,0.177387132652012,-0.223  
979791711866,0.822773027666767,0.886370986985283,-0.0047923571399393  
"6430548M08Rik",699.592552339154,-0.540965555447792,0.245333790214393,  
-2.20501853811108,0.0274527937002733,0.0735624528215277,-1.41171482238  
678

"Crispld2",3747.77006271157,-1.04454183129071,0.242395857779198,-4.309  
23960855055,1.63816809992992e-05,0.000246078594856961,-8.6799959453105  
7  
"Usp10",2843.14606522935,0.88615865592613,0.0810401897846512,10.934804  
7960022,7.85749009412352e-28,5.10684472850735e-24,47.5259829416797  
"Cotl1",6491.85200343364,-0.0860570349559447,0.296948696890212,-0.2898  
0438660676,0.771965891792296,0.852502886167092,-0.0137328684127663  
"Klhl36",651.536187461666,0.643124868746716,0.155741821546041,4.129429  
47733916,3.63664527196994e-05,0.000454242854022229,4.95005402792921  
"Dnaaf1",13.9765345161575,0.657261287544902,0.445161238625761,1.476456  
68696113,0.139821334552708,0.254076083980307,0.900527830113925  
"Taf1c",854.361571219137,0.0623231233271493,0.182350348603257,0.341776  
825789057,0.732518850852484,0.824966935477487,0.0119917150393684  
"Mast3",2455.92958714449,0.296705926609542,0.269016724871787,1.1029274  
3602076,0.270058678551184,0.412406337279996,0.262806135181945  
"Pik3r2",2478.30711474981,0.181585543911436,0.0862388309338571,2.10561  
230880678,0.0352380425834584,0.0888638926510553,0.439554933536659  
"Mbtps1",3881.70451244904,-0.253710259764449,0.0956041100112287,-2.653  
75892035029,0.00796006749935754,0.0283791179562028,-0.903741744443151  
"Necab2",4.69393816703683,-1.21601639021547,0.79633533365394,-1.527015  
49061731,0.126757159470306,0.235786214019464,-1.75693666595529  
"Hsbp1",6702.83192808875,0.244549314092686,0.176930287202073,1.3821789  
2459184,0.166916769578703,0.290168732780833,0.302579078189132  
"Rab3a",497.118438601329,0.256020565651725,0.177005942905102,1.4463953  
0995287,0.148066356577786,0.265300295952368,0.339711871406247  
"Cdh13",946.750484767892,-1.17253425180916,0.308256101459559,-3.803766  
5637674,0.000142512483783646,0.00131071151359128,-7.78232692288402  
"Pde4c",5499.28943262276,1.64664966097089,0.546396993542903,3.01365066  
138783,0.00258124840656808,0.0121238823926065,7.26597010099053  
"Mphosph6",767.812095424696,-0.279649981021564,0.123742926848058,-2.25  
992699659466,0.0238257820843318,0.0658476398412902,-0.760763078282896  
"Hsd17b2",430.178728628654,0.994979908749918,0.449789167849322,2.21210  
286923413,0.0269595579250686,0.0725778239020283,2.60992767913402  
"Bco1",105.539104576398,1.23463995402142,0.38302073344507,3.2234285149  
9572,0.00126665909538071,0.00705234695651999,6.11689378773558  
"1700030J22Rik",83.1698275616551,0.504563579153233,0.245155700307953,2  
.05813521170188,0.0395771557428646,0.0971027284100131,1.17663510436051  
"Lsm4",3627.23800893125,0.559171731446419,0.273801288560295,2.04225383  
447486,0.0411263588872327,0.100010195258576,1.2874834871542  
"Comp",42.3861117597043,-0.697695141534837,0.338032938888586,-2.063985  
66905574,0.0390190751814036,0.0961934413815915,-1.6335792883659  
"Ntpcr",864.477656234127,-0.241077509662849,0.158448863562756,-1.52148  
462439029,0.128138266896171,0.237645709614936,-0.346422192796182  
"Map3k21",829.783436516967,0.0717421750263809,0.472132313953178,0.1519  
53536977127,0.8792235821164,0.924555139904302,0.00562764180512505  
"Mau2",3758.11723052097,0.174055872122648,0.202288220462634,0.86043503  
5340077,0.389549280009431,0.533724394745548,0.109285450453128  
"Pbx4",111.193335929598,0.315740687123896,0.272306404096572,1.15950518  
377056,0.246250324777017,0.385313284046406,0.301121435736452  
"Lpar2",609.923203498891,0.626163350068633,0.230075295857482,2.7215583

825936,0.00649749068927291,0.0243023352118633,2.32756365615458  
"Atp13a1",3898.83440875759,0.149097489280633,0.126562930017982,1.17805  
023366201,0.238776580409892,0.376854926730781,0.145503490622553  
"Ints10",920.816207233915,-0.0854834294048687,0.251928914278368,-0.339  
315674223936,0.734371936016567,0.826236908055152,-0.0163165412765788  
"Dctn1",4772.03153269491,-0.214645316670232,0.124082503073805,-1.72985  
966073363,0.0836553520208297,0.172058233512884,-0.377759077795997  
"Pgr",128.155285635259,-0.41826912122298,0.524183184115452,-0.79794456  
1935538,0.42490266207014,0.567909819198452,-0.236653591114802  
"Cdh5",2958.12758268635,-1.72636032564556,0.438578824168283,-3.9362600  
9855677,8.27612730593833e-05,0.000854450542227716,-12.1968253614172  
"Bean1",35.157403882903,-1.77339872335434,0.579798642301671,-3.0586458  
7111544,0.00222339804849943,0.0108488025900005,-8.02232480761423  
"Cmtm3",2412.05414022883,-1.1731470326694,0.235851209948599,-4.9740980  
0409787,6.55521414098927e-07,1.9543358611775e-05,-12.7202866813633  
"Ces2g",329.612839147933,-0.506932737730593,0.385420963857359,-1.31527  
027657531,0.188419083866116,0.317500241744148,-0.58159211808572  
"Nae1",1800.51774298397,0.292202511407044,0.154587255256874,1.89021087  
748468,0.0587297624858123,0.131425790077857,0.592970331850357  
"Ciao2b",1015.56650006588,0.20956649697923,0.198312669658153,1.0567478  
9886333,0.29062665824746,0.434291736856911,0.174786582529363  
"Rrad",963.044684649946,-0.705361555660261,0.345798301146153,-2.039806  
30709385,0.0413696213913892,0.100438908963928,-1.62106588240438  
"Cdh16",24739.7155501467,1.34303607111623,0.57234490746098,2.346550224  
53885,0.0189481123085684,0.055166536328575,3.89131101412925  
"Car7",223.365801719832,-0.188852873230969,0.190496006104016,-0.991374  
449750144,0.321502771576208,0.466800285962685,-0.143878272684848  
"Ces2d-  
ps",6.48611421409088,1.01635505972375,0.657665528203936,1.545398103043  
93,0.122249998879864,0.229857226922597,1.49434370917764  
"Cbfb",1834.2491842611,-0.512751549136309,0.154362638916952,-3.3217335  
0192706,0.000894600939003352,0.00541201647802897,-2.67611879955842  
"Ces2e",394.171788471038,0.858227460770789,0.317069897904601,2.7067453  
1528379,0.00679463613097964,0.0252058248253122,3.15886079390226  
"Tradd",919.990418971837,-0.0350090395073865,0.156064349592482,-0.2243  
24386695634,0.822504901851469,0.886180061684254,-0.00423032145962511  
"D230025D16Rik",1154.60791557808,-0.151129184664065,0.207730703701795,  
-0.727524540045927,0.466904687891026,0.605469827505788,-0.075829151214  
835  
"Hsd11b2",6360.99039558508,1.71233476510888,0.609898836354243,2.807571  
78574828,0.0049916553117451,0.019870823860434,6.70978850440704  
"Tsnaxip1",9.63363088816805,-0.36894973949813,0.889340180617797,-0.414  
857832288464,0.678245980338266,0.783299184068916,-0.0901124896099429  
"Ctrl",67.1057812015624,-0.50395604635007,0.445049822073584,-1.1323587  
1885541,0.257483652798359,0.39844573510019,-0.463732271868976  
"Psm10",2661.60812116711,-0.608756512583635,0.207996044172137,-2.9267  
6966529148,0.00342502436798125,0.0149619073969528,-2.5581457247297  
"Dpep3",20.976097362629,-0.809300741852142,0.702881833650345,-1.151403  
69704694,0.249566193583574,0.389189925817206,-0.763727247412317  
"Dus2",753.29638359519,-0.527160278818437,0.217572040081589,-2.4229229



0232124,0.0153961938068059,0.0470377603956598,-1.61142595846162  
"Nfatc3",1677.84576150089,-0.215952399032428,0.122094293826525,-1.7687  
3457607494,0.076938179304224,0.161218766262629,-0.394111625132959  
"Pla2g15",1503.45745468369,-0.935916952946725,0.138570810682175,-6.754  
06998298752,1.43754354090294e-11,5.19059702972695e-09,-17.853942176374  
6  
"Slc7a6",1010.29624882618,-1.43520019243076,0.328668565388895,-4.36670  
96387285,1.26132224328979e-05,0.000202914695541784,-12.2031123929249  
"Smpd3",68.6348875589075,-1.68005622740192,0.391950432912107,-4.286399  
72386168,1.81592114865919e-05,0.00026742319151478,-13.8212818859439  
"Zfp90",819.368715553566,-0.104381736404505,0.280735419443757,-0.37181  
5343469392,0.710030338979968,0.807543923291356,-0.0223124135902757  
"Has3",116.012192763364,-0.220423892713567,0.226388506446045,-0.973653  
195446561,0.330228764075705,0.474837790704137,-0.164167753509528  
"Vps4a",2325.41667996698,0.0157226941079717,0.128379086831416,0.122470  
836146532,0.902526141482671,0.94028611844131,0.000968063079261903  
"Cog8",2097.293844865,0.274236640535327,0.123060334692647,2.2284730593  
3513,0.0258489859151237,0.0702835765406612,0.728157824822169  
"Nip7",1077.55935283305,-0.309171167411892,0.145295465588699,-2.127878  
98203988,0.0333471186341597,0.0852276994532503,-0.761311982754819  
"Mtmr2",2043.66676598135,-0.00420190498290016,0.182970004288557,-0.022  
9649936296304,0.981678196616964,0.988267321232836,-4.95910917864717e-0  
5  
"Tmed6",319.217811540579,1.22721543124297,0.643993314149513,1.90563380  
749332,0.0566977326934243,0.128054256000972,2.52229738514245  
"Terf2",1865.97486289036,0.0541910881134205,0.101885920462579,0.531880  
046500872,0.59480907788969,0.717545728595398,0.0179870301069535  
"Cep57",1379.06196109456,0.355274485460072,0.142276950694734,2.4970628  
3221054,0.0125226765885518,0.0402251116528057,1.1415906468876  
"Cyb5b",16464.2279621314,-0.42988013027868,0.387411245182663,-1.109622  
23121839,0.267161847351053,0.409200447733765,-0.38411945520924  
"Maml2",1527.02239603371,-0.0355280267085045,0.227577605975823,-0.1561  
13895987986,0.875943245245694,0.922498725062145,-0.0028660205161169  
"Mre11a",563.479091413038,-0.421743981635083,0.158476783756721,-2.6612  
3511367133,0.00778545720608417,0.0278763732154262,-1.50983324260097  
"Wwp2",3167.86291602975,0.353555490501671,0.147149520255842,2.40269550  
241795,0.0162747326432695,0.0491519109477181,1.06520596604573  
"Ankrd49",695.992339359364,0.175167108443333,0.218335487016863,0.80228  
4185849294,0.422388588062592,0.565602135158603,0.0998214972914708  
"Gpr83",5.03808645243978,-0.880932933335543,1.00448343653124,-0.877000  
955214999,0.380486119241305,0.525330573075128,-0.567080800251303  
"Izumo1r",59.4673933985351,-1.34189413935987,0.651001323947462,-2.0612  
771280142,0.0392766089642186,0.0965962817336446,-3.13629515101255  
"Panx1",392.347033710156,-1.22819345892636,0.358410781353108,-3.426775  
98673109,0.000610792723497463,0.00401796104006529,-6.77591961980012  
"Med17",1172.95462750638,0.0131094765384365,0.0950405230232117,0.13793  
5652303121,0.89029127324842,0.932221644691354,0.000920084368333762  
"Heph1l",73.9381745340836,-3.89638775197134,1.96839371354014,-1.979475  
81582331,0.0477624598848899,0.112426991345262,-8.51536542001426  
"Vstm5",490.776371201829,1.08616243465241,0.338746799040435,3.20641386

938317,0.00134400532854688,0.00739013420643179,5.33046095645889  
"4931406C07Rik",22448.5833119665,1.35879857465082,0.476619656141499,2.  
85090754680798,0.00435946431566866,0.0178917955734058,5.46700787553483  
"Taf1d",3291.28976076243,0.338734497417398,0.264496495262371,1.2806766  
9509717,0.200307248779366,0.331825890968571,0.373673223937052  
"Kars",2890.36325676048,-0.1252286426643,0.15349419400557,-0.815852635  
180167,0.414584424770115,0.557910629730671,-0.0730779873110534  
"Adat1",610.332612673661,0.216532745887312,0.296940465873588,0.7292126  
56315738,0.465871590507504,0.604684081461543,0.108926610893871  
"Gabarapl2",4329.28380600423,0.449136274331968,0.233764668083695,1.921  
31804183156,0.0546916239564474,0.124402389629353,0.936105044021424  
"Tmem231",611.01180808393,0.447775097897515,0.200483486942358,2.233476  
20657784,0.0255175576700141,0.0695683602203607,1.19352007919557  
"Chst5",5.33530470008527,-1.70937471702205,0.875389879286773,-1.952701  
0278149,0.0508550318428879,0.117931899485327,-3.6540413495759  
"Tmem170",944.626560448452,0.307670524850718,0.129756727485421,2.37113  
351124924,0.0177336239301875,0.0523735533763701,0.907429145967196  
"Cfdp1",3576.52808268516,0.160376210984696,0.0904004709289881,1.774063  
88856841,0.0760525831153928,0.159809598618809,0.294093434198445  
"Bcar1",4305.34319549666,0.279578702812836,0.17794151721163,1.57118308  
978071,0.116140126817388,0.22084066634342,0.422251574234707  
"Ctrb1",3.08384837992003,1.9626405714453,1.16884630277421,1.6791263032  
5051,0.0931274309287008,0.186849006817021,3.29224013768709  
"Ldhd",28175.5302739435,1.59229956025223,0.516238803393679,3.084424397  
74903,0.00203946437042361,0.0101390811561753,7.31081716622412  
"Wdr59",923.285598885727,0.0759740255404404,0.130022757798279,0.584313  
29120329,0.559009551569548,0.687686419683884,0.0284463716846446  
"Aars",5147.58014274159,0.143689225207872,0.114041430550908,1.25997389  
294174,0.207678780318436,0.340765872140779,0.1546900190491  
"Cdh15",1.38206462817117,-1.54889640402143,1.43544237570237,-1.0790376  
7524178,0.280570932825107,0.424388906329339,-1.3275668713296  
"Bmper",89.9970758529944,-3.27715052571784,0.744411737108265,-4.402335  
91486376,1.07091577289908e-05,0.000180629028892615,-28.2459740319051  
"Tbx20",0.806691348952345,-1.31408783681861,3.53636372854992,-0.371592  
951881523,0.71019593751512,NA,NA  
"Glb1l3",4.13465753938315,-2.3888648649916,1.1379356170165,-2.09929703  
339004,0.0357907247852738,0.0900216140174495,-5.75168303056492  
"Afg3l1",3435.73141570665,0.421722095926164,0.173856038669235,2.425697  
14088849,0.0152790148549502,0.0467676972750109,1.29155029476783  
"Acad8",2758.27910579948,0.386222568885279,0.156172389878723,2.4730528  
1801223,0.0133964342306256,0.0424307463659418,1.22041775476869  
"Dbnnd1",19.5764635899536,0.161582666869702,0.360577797879896,0.448121  
508921975,0.654065505795651,0.764383195397004,0.0434150086553305  
"Ccsap",33.8637596461823,-0.768615587778157,0.400423119793849,-1.91950  
851432821,0.0549200097959263,0.124790857825541,-1.5995782593198  
"Acta1",23.2683613276855,-3.7761593245199,0.914570815825663,-4.1288867  
512253,3.64523880942672e-05,0.000454601090549151,-29.0616629509288  
"Abcb10",1595.85557853464,0.295577022313847,0.139595594576093,2.117380  
73261853,0.0342275480758381,0.08704580959819,0.721598318329812  
"Urb2",496.637825118246,-0.15431766199398,0.176379154810311,-0.8749200

67283132,0.381617399416273,0.526519675475409,-0.0989896225307049  
"Cog2",1579.58630651821,0.167688059453944,0.122834880851059,1.36515017  
796347,0.172205853758823,0.29748114969341,0.203305744191367  
"Agt",2335.22981909789,1.65126584908262,0.302724515688494,5.4546816115  
2098,4.90606705927638e-08,2.67202501457461e-06,21.1901562305116  
"Capn9",5.1775134714164,-3.60559143740653,1.61411396067461,-2.23378988  
426542,0.0254969014526118,0.0695395977791335,-9.61199815456466  
"Arv1",208.051538120941,0.0563045232881034,0.14835174095907,0.37953395  
7094834,0.70429139303835,0.80365361648451,0.012307432772593  
"2310022B05Rik",3506.11347808593,-0.7429074207327,0.260772909034807,-2  
.84886732859793,0.00438751723564669,0.01797222921442,-2.98569108830761  
"2810004N23Rik",1416.75979793053,0.288337897561768,0.14381690594399,2.  
00489570867324,0.0449741975871808,0.107135846616353,0.644048152181346  
"Gnpat",3809.8749310908,-0.603598366522116,0.362263982719878,-1.666183  
76464119,0.0956768186384057,0.19078611268272,-0.999922446662231  
"Sprtn",1591.24009959937,-0.311965318203414,0.182503949711958,-1.70936  
200940189,0.0873839135329385,0.177906603953768,-0.538607049740926  
"Egln1",3580.46235869887,-0.145602157213204,0.301886788939107,-0.48230  
7151382411,0.629587767813018,0.74550640027836,-0.04275348458382  
"Vps26b",1644.43030529954,-0.376817545030664,0.219205315944016,-1.7190  
1645454119,0.085611375813457,0.175102339831195,-0.656561116467926  
"Jam3",1352.47569023853,-0.201751900919369,0.126792242773341,-1.591200  
66422383,0.111564423455437,0.214123745303092,-0.31094026816808  
"Spata19",0.091991025955798,0,4.78471990596463,0,1,NA,NA  
"Snx19",2525.67739246696,0.375144863806379,0.0885643585944452,4.235844  
64179599,2.27694171705832e-05,0.000317750641796379,3.02150812891993  
"Adamts8",83.168435974087,-0.592146615044273,0.322623102183153,-1.8354  
1293551914,0.0664445285182669,0.144172648236053,-1.14683625664959  
"Stt14",4969.24237320787,0.239900505395066,0.296280048292917,0.80970860  
7708503,0.418107669669464,0.561218734903979,0.138577218922762  
"Aplp2",20193.2368607981,-0.430466889142122,0.288034678336024,-1.49449  
674472855,0.135045832122806,0.247195234203011,-0.601610551508814  
"Trpc6",62.4454723286836,-0.232955419948009,0.328495244477174,-0.70915  
9185298943,0.478225698275104,0.615596795733016,-0.113021369543898  
"1700128F08Rik",21.0745833169617,0.28396470477601,0.40888995664057,0.6  
94477084027832,0.48738306712294,0.624170446158495,0.133841594591365  
"Birc3",2184.69186953402,-0.83703314408339,0.280094518180853,-2.988395  
30855413,0.00280446561643668,0.0128582046395005,-3.64425245184471  
"Dcun1d5",2278.04545056378,-0.0576130645296988,0.0926768346588363,-0.6  
21655505842265,0.53416841466414,0.66636057256055,-0.0233865460417907  
"Pdgfd",799.604390836972,-0.458145278948082,0.158055808211206,-2.89862  
982027129,0.00374797112532346,0.0159929690089283,-1.89470840584386  
"Sesn3",2180.23558745689,-0.570412403779274,0.182986947120511,-3.11723  
001424585,0.00182559075702285,0.00931084713063865,-2.66757650149015  
"Usp2",5755.42058676978,2.58459010977525,0.435902978392276,5.929278389  
67261,3.04268850741832e-09,3.33294047851924e-07,38.5471990339309  
"Thy1",2064.71352020785,-1.48374167789735,0.348875434035337,-4.2529267  
8459861,2.10994576578777e-05,0.000299633813119665,-12.0375212323242  
"Nectin1",1738.59389797419,-0.349200525734332,0.261243109356204,-1.336  
68798612483,0.181324505093183,0.309179291675284,-0.409903428412342

"Trim29",318.034019527826,-3.08294502561564,0.780780548112024,-3.94854  
230560737,7.86285218147827e-05,0.000819400811515036,-21.9102966957326  
"Oaf",1776.55298529015,0.0482332654682234,0.212394769643805,0.22709252  
939285,0.820351792991238,0.884740265487204,0.00590670175436355  
"Pou2f3",22.2292521470425,-2.73626038013184,0.69215756599818,-3.953233  
35978535,7.71021747866204e-05,0.000807378197631324,-19.4868757680219  
"Grik4",29.2490559943705,-0.7986295629898,0.599626588762557,-1.3318781  
6877488,0.182900225934416,0.311073696146945,-0.932580049670874  
"Sc5d",2834.48525158309,-1.5962570396414,0.577357582306161,-2.76476327  
420073,0.00569641184647032,0.0219070292273133,-6.09921470313633  
"Ubash3b",1238.03383000088,0.20174199956488,0.40660188496115,0.4961659  
23048183,0.619777351298159,0.737889649851103,0.0613216982167086  
"Crtam",31.2202411039462,-0.303440594340735,0.59246505475004,-0.512166  
231422301,0.608534674443822,0.728552688340024,-0.0960982196280672  
"Jhy",0.255546039209667,-0.466787283766769,4.78471990596179,-0.0975579  
120493865,0.922283346338399,NA,NA  
"Clmp",865.212285158007,-0.76860669736934,0.293509804617037,-2.6186746  
9256162,0.00882720814411359,0.0307281450191073,-2.67673144407218  
"Rexo2",3315.62694212191,-0.213631209748143,0.204127673330147,-1.04655  
682526017,0.295304023451513,0.439697430260222,-0.17553402436903  
"Nxpe2",59.1373512676419,-0.895795175091506,0.29318762234073,-3.055364  
91595287,0.00224786837620443,0.0109462881116968,-4.04429562516528  
"Cul5",1687.54993569998,0.00295611190622372,0.12643377542659,0.0233807  
137076287,0.981346589032964,0.98808619920146,3.54300029770982e-05  
"Barx2",39.763941686466,0.169521217551819,0.450210836140251,0.37653739  
9688464,0.70651741682396,0.805124289493487,0.0367451846000708  
"Kcnj5",61.1364781521368,-0.117695986352498,0.574273274407886,-0.20494  
7699288027,0.837612987472796,0.896267041474293,-0.0128896963960748  
"Ets1",3182.50704283677,-1.22519995641648,0.17752962749346,-6.90138301  
823235,5.14986708963086e-12,2.44907581740543e-09,-24.2927196455167  
"Kirrel3",167.487269118862,-0.919451603516361,0.461004323583134,-1.994  
45331959138,0.0461025365264882,0.109170179401684,-2.03644493404739  
"St3gal4",1200.65910718021,-1.09398488626866,0.153758430317751,-7.1149  
5873109444,1.11946327485969e-12,8.73091797328572e-10,-22.8194093159315  
"Dcps",816.701504141871,-0.219909021440196,0.209735268795663,-1.048507  
59103584,0.294404806726202,0.438592979947089,-0.181245375695009  
"Tirap",743.378282444264,-0.214978780040168,0.195819943269468,-1.09783  
90477028,0.272274777408985,0.414880713497999,-0.189130642484314  
"Srpr",4647.76639300674,0.0327781613403901,0.138928716434346,0.2359351  
05294666,0.813483027008682,0.881280812346665,0.00414246997702857  
"Rpusd4",755.711485741413,-0.04407280893221,0.0932257042167487,-0.4727  
53832245034,0.636388815515639,0.750971925493187,-0.0126218800053957  
"Abhd12",2687.28902445796,-0.80343871517728,0.228305465055052,-3.51913  
921545218,0.000432949455351382,0.00308089360600046,-4.645912966711  
"Acat1",20974.4896064915,1.28295197253041,0.38059518248549,3.370909647  
7576,0.000749204253548739,0.00470466490682554,6.87559714662956  
"Rdx",11019.1539373858,0.831642002854925,0.309076314031346,2.690733534  
40659,0.00712951154308849,0.0261319254363876,3.03100037726803  
"Fdx1",3137.53197521824,0.952741622855748,0.375007591641886,2.54059289  
48915,0.0110664691327283,0.0367116771805219,3.14848750793296

"Pou2af1",172.450588540785,-2.05112044670644,0.902271126913435,-2.2732  
8613930392,NA,NA,NA  
"Btg4",0.399383866395143,-1.46337485789666,4.76251468280563,-0.3072693  
64056757,0.758638352407435,NA,NA  
"4833427G06Rik",0.587769145515544,-1.60379334043389,2.35583556125647,-  
0.680774739463783,0.496014036111927,NA,NA  
"Ppp2r1b",2418.04605676358,-0.998453965195622,0.428091518948337,-2.332  
33764511022,0.0196829356058851,0.0567299155127194,-2.86501732180188  
"Alg9",1008.87294312243,-0.326176311531272,0.352193328516013,-0.926128  
592229827,0.35437915657067,0.499507322693192,-0.226409748487017  
"Cryab",6639.54554373761,0.0760880208296933,0.329950948051924,0.230604  
037596883,0.81762243060162,0.883107669311625,0.00945836110737468  
"2310030G06Rik",1690.43041101096,1.34896406906908,0.342477342243556,3.  
93884179383098,8.18758940853349e-05,0.000847804664299448,9.54103440675  
156  
"Dixdc1",709.024318072197,-0.349084132345518,0.397238584124022,-0.8787  
77002781104,0.379522197805267,0.524371018481228,-0.225353284464367  
"Tex12",0.329417671968437,0,4.78471990595562,0,1,NA,NA  
"Bco2",637.966489772057,1.39760934849901,0.296868619458763,4.707837935  
33675,2.50358016780704e-06,5.70266426540908e-05,13.657427350785  
"Pts",3725.428632869,0.33940822236969,0.174398300192477,1.946167032563  
38,0.0516346786261265,0.119202342055509,0.721898506687815  
"Plet1",2615.4406977511,-1.17200846495616,0.437018060728756,-2.6818307  
3029467,0.00732204980620841,0.026670152647385,-4.24760505338953  
"Cadm1",2130.69368034475,0.152845374259362,0.217039939401279,0.7042269  
48648238,0.481291451106918,0.618818692460186,0.0733570602964104  
"Bud13",577.92174801835,0.0130112440358787,0.164448329342415,0.0791205  
607737528,0.936936729645835,0.960836919719902,0.000519806783939545  
"Zpr1",1597.21346744407,-0.100070514842113,0.102301588484901,-0.978191  
212122606,0.327979762004956,0.472637279873301,-0.0749955492122714  
"Apoa5",8.28118798830356,1.52330831103965,0.739264748732851,2.06057209  
362505,0.0393438813723529,0.09673732648148,3.55807644828881  
"Apoa4",510.8918264003,2.21189457970693,0.982720321579147,2.2507874632  
6585,0.0243990019531643,0.0671179091538936,5.97500049010294  
"Apoc3",407.8811023042,1.53344124077266,0.457580426288916,3.3511950089  
5008,0.000804636181020812,0.00498321423858778,8.12981501302003  
"Apoa1",106.353890665303,1.38866656380336,0.61720106794281,2.249941932  
91324,0.0244526316091251,0.0672231981751915,3.74903433643983  
"Tagln",11431.2646263799,-1.56142900337514,0.28432522049849,-5.4917006  
6812074,3.98081673967513e-08,2.26182406888254e-06,-20.297544876994  
"Bace1",1802.05819167943,0.00423861914744281,0.161281400082898,0.02628  
08925596142,0.979033295176193,0.986669833155619,5.68814681052778e-05  
"Dscaml1",47.1780060594494,-1.18366298259664,0.493992322747053,-2.3961  
1615017493,0.016569838652212,0.0497886753029481,-3.55095074431778  
"Il10ra",1738.40558170102,-1.07883324676569,0.381976094727277,-2.82434  
754859713,0.00473769806959585,0.019050451012782,-4.27289654455799  
"Tmprss4",120.407651403869,-1.0029981908683,0.365053005121798,-2.74754  
125235501,0.00600439549702131,0.0228590508866755,-3.78973652877758  
"Mpzl2",926.083541259925,-1.48922206697697,0.498872892854294,-2.985173  
35439175,0.00283417654933955,0.0129405701951478,-6.47422603361505

"Cd3e",278.896255395836,-1.57728803541531,0.49475126233937,-3.18804246  
796117,0.00143239497274477,0.00776663992730184,-7.66233538625356  
"Cd3d",349.781093658353,-1.314984013545,0.51263574102213,-2.5651430603  
0066,0.0103133272707468,0.03470047543141,-4.41966375606723  
"Arcn1",6498.7886113311,0.0649526274037632,0.105163503055315,0.6176346  
88049511,0.536816173400471,0.66829534854823,0.026177536856295  
"Ddx6",9700.99931970751,-0.285618050199625,0.158220800602693,-1.805186  
48061224,0.0710455057800737,0.151824339291964,-0.538398904200609  
"Treh",2870.61399430282,2.02248365959884,0.833267551993594,2.427171986  
66868,0.0152170402036354,0.0466512342595098,6.19902546171894  
"Pate4",0.226700398769636,0.922820795098962,4.7498124416823,0.19428573  
3685121,0.845952155671611,NA,NA  
"Ddx25",5.53000438998649,-1.04118214480835,0.790607769935355,-1.316938  
92268916,0.187859098338393,0.316775637758539,-1.19690293212046  
"Pus3",561.6956282008,0.242887917670632,0.112886554628757,2.1516106897  
7082,0.0314280294897314,0.0814438754639531,0.609124312482764  
"Pdzd3",3641.78401793966,1.85949918495728,0.719007231962192,2.58620372  
966577,0.0097039554537965,0.0330205451026395,6.34205502573596  
"Pate6",0.767637256814793,-1.6675313986699,2.82668050197336,-0.5899256  
73420029,0.555240481100858,NA,NA  
"Nlrx1",858.854313315641,0.109677752422691,0.224807770609204,0.4878734  
93542844,0.625639450528658,0.742564703306792,0.0326450641891097  
"Acrv1",0.126850756555144,-0.0644028076075004,4.78471990596623,-0.0134  
600998330528,0.989260718437602,NA,NA  
"Trappc4",1897.15146297583,-0.693291498481595,0.37836659376484,-1.8323  
2745677459,0.0669026487871643,0.144924769031455,-1.33912061141412  
"Chek1",120.926006525712,-0.578238518659821,0.245402094292708,-2.35629  
007293685,0.0184584974773171,0.0540233839406679,-1.68749560988075  
"Slc37a4",6384.59105648955,1.56224006859405,0.43007974328434,3.6324428  
0389462,0.000280750817711567,0.00218963177749605,9.56719237347476  
"Hyou1",5098.348673882,-0.422975348001382,0.183959960792267,-2.2992793  
9851551,0.0214890789007556,0.0608296037849695,-1.18419507418051  
"Stt3a",4383.76490339433,0.426607086737667,0.146835290199646,2.9053443  
9069536,0.00366849210089325,0.015744719124635,1.77095278127676  
"Fez1",48.5348451165496,-1.66849609044226,0.471686034302532,-3.5373022  
92423,0.000404236706479478,0.00291702712914021,-9.7393291743338  
"Hinfp",928.933366937475,-0.345981556767895,0.213111531575223,-1.62347  
646892009,0.104487589609679,0.203946922211882,-0.550074521651027  
"C2cd2l",2352.08998739617,0.844359901389816,0.215087473625967,3.925658  
18527461,8.64929070555263e-05,0.000883078642617973,5.93762013702893  
"Tmem218",363.663391047847,-0.269307240588666,0.191578305147666,-1.405  
7293198261,0.159804517110375,0.281128749063708,-0.341735411990173  
"Slc37a2",408.808314303463,-0.839303627540764,0.28451549306374,-2.9499  
3997867362,0.00317835668564484,0.014103686539987,-3.57654054435684  
"Dpagt1",1164.76271287826,-0.147419406062073,0.0942013908583846,-1.564  
93874154886,0.117597273609273,0.222986542164932,-0.22122402631297  
"Robo4",1613.57821800399,-0.487364493942978,0.267637063933618,-1.82099  
028729391,0.0686083333037126,0.147913012246328,-0.931417360072045  
"Hmbs",1544.66741450007,0.173949519767637,0.25850436616053,0.672907472  
903632,0.501006157695584,0.636143400804148,0.078682806860964

"Vps11",2538.94098736589,0.0869060302579304,0.107813385477887,0.806078  
297910005,0.420197704078856,0.563209928791471,0.04989299922286  
"Robo3",734.661802052646,1.14517205910812,0.594770291235638,1.92540225  
358099,0.0541790538877629,0.12356804219249,2.39451277721566  
"Abcg4",41.9435024393071,-1.02910220476723,0.379798735965824,-2.709598  
81462016,0.00673646354647899,0.0250281185650243,-3.79507715470184  
"Mcam",2546.7808062878,-1.78434173543961,0.35368181227984,-5.045048044  
56215,4.53407423236402e-07,1.46852789672149e-05,-19.8573414134236  
"Pin1",1427.23786631783,-0.386616083615138,0.27905003318468,-1.3854722  
7249125,0.165908105195104,0.288790057808662,-0.480198555111021  
"Olfm2",161.870991488041,-1.66395617355514,0.315122484398286,-5.280347  
34408877,1.28939214593587e-07,5.54979427405244e-06,-20.1367811218566  
"Icam5",17.5989933512173,-0.397606411083139,0.501442449704523,-0.79292  
5312401114,0.427821338743717,0.570849861403586,-0.222909701994402  
"Tyk2",2105.1448943559,-0.377287167036267,0.14674409699815,-2.57105515  
488656,0.0101389178123097,0.0341962669960931,-1.27358519716081  
"Pde4a",1251.76441653622,-0.46313539368916,0.219364072635211,-2.111263  
65464287,0.0347496561971054,0.0879134288998521,-1.12606865187662  
"Ilf3",1906.70133111881,-0.290759510145244,0.130371657140018,-2.230235  
59356134,0.0257318064372399,0.0700340186755305,-0.77306387639125  
"Bmp5",32.6477285940595,-1.67410928533216,0.732666550587997,-2.2849538  
9067321,0.0223155315760418,0.0626686208655714,-4.637105970057  
"Tmed1",953.048894790334,0.355660692545936,0.145488517986836,2.4445962  
9850733,0.0145014361472666,0.0451531462790487,1.10172846156919  
"Scg3",4.13870443648813,0.363085641272433,1.08072572084856,0.335964652  
518259,0.736897521925503,0.827985240736671,0.0685360274752392  
"Yipf2",1550.60893502415,0.244097020849824,0.111835001282932,2.1826531  
7699851,0.0290613605240434,0.0767594699942832,0.626616217208078  
"Lysmd2",161.778349675466,-1.46488722721874,0.29336743944066,-4.993353  
14788757,5.93399093875596e-07,1.79939277331048e-05,-16.0045905441971  
"Carm1",1885.6964904788,-0.0767320473074241,0.187549933548806,-0.40912  
8629669474,0.682445266976022,0.786285990397594,-0.0184490465648536  
"Tmod2",117.810182075525,-1.37362211212786,0.431298497174675,-3.184852  
53513774,0.001448277884919,0.00782939529637445,-6.66188867436409  
"Smarca4",7356.66543693777,-0.0662429999900433,0.224631047215427,-0.29  
4896902325859,0.768072638362669,0.849936453053083,-0.010770694030711  
"Bcl2l10",14.9413754889472,-2.52565762730315,1.09810507238102,-2.30001  
453488122,0.0214473965968577,0.0607468534058006,-7.07446802495506  
"Gnb5",844.997588178836,-0.546678579003424,0.274677872425897,-1.990253  
43459695,0.0465630247406526,0.110113505930048,-1.20610610148454  
"Ldlr",1800.55700156817,-0.989974462914206,0.214673677743291,-4.611531  
66667237,3.99712749917205e-06,8.38923487393506e-05,-9.29187669173685  
"Kank2",3831.43782864858,-0.894186792239853,0.149944997380744,-5.96343  
19774558,2.46994302452767e-09,2.95453675412518e-07,-13.4438782539236  
"Dock6",4348.23535360521,-0.310256624162691,0.240307807201689,-1.29108  
008506064,0.196675908916863,0.327643974017842,-0.346192936958732  
"Polr2m",5825.52104838418,-0.556436407152358,0.289206064571444,-1.9240  
13619759,0.0543528763114956,0.123831376708811,-1.16230356658864  
"Rab27a",813.314241969694,0.403028155548443,0.185575123667831,2.171778  
99484977,0.0298723367842677,0.0784023182958205,1.02607009939213

"Aqp9",135.530139844723,-1.20584997478167,0.422898256856747,-2.8513949  
9922351,0.00435278597466717,0.0178750254705267,-4.85276326906485  
"Lipc",16.1363514826591,-1.22608297477769,0.715201121070735,-1.7143191  
4556021,0.0864701288125516,0.176414625048355,-2.12715370493563  
"Sltm",6664.49858257081,0.493210386375592,0.229979149419499,2.14458740  
116453,0.0319858505168221,0.0825165537677953,1.2304397452883  
"Rsl24d1",1821.61843439856,-0.0338984939854591,0.165163564292172,-0.20  
524196199528,0.837383086277821,0.896217774522174,-0.00371432048184251  
"Nedd4",16162.4117106797,-0.940243706548785,0.196211324207106,-4.79199  
511214925,1.65130927141304e-06,4.04291786585898e-05,-9.51146658768973  
"Rnf111",1891.64679179155,-0.11743599499631,0.10994328730789,-1.068150  
66087151,0.285452556666975,0.429654308441239,-0.0992069136949801  
"Ccnb2",192.815907534906,-0.352719909035257,0.383507460577711,-0.91972  
1114431319,0.357718515882216,0.502869186926565,-0.242468556995748  
"Myo1e",2378.17308142158,-0.379986586040459,0.234980428798388,-1.61709  
88706744,0.105856940618451,0.205679982877783,-0.600923630434125  
"Mns1",127.581623610569,-0.666823184081388,0.325674123492536,-2.047516  
63082827,0.0406073856570465,0.0990368448677633,-1.54187079461442  
"Fam81a",1056.5417476198,0.907739527758958,0.357410176121624,2.5397696  
7754287,0.0110925491285492,0.0367702351085434,2.99832410625232  
"Gcnt3",62.9334715850551,-3.63832191007418,1.13602872525063,-3.2026671  
7663455,0.00136161244005158,0.00746799419300304,-17.8173311218718  
"Tcf12",2363.28122667393,-0.501853187451268,0.122458460971736,-4.09815  
037253406,4.16464704697143e-05,0.000503112070147763,-3.81142320290899  
"Anxa2",13266.0134608994,-1.33386939312341,0.258317042501353,-5.163691  
02172741,2.42127245692644e-07,9.02676297612844e-06,-15.4933154765237  
"Cgnl1",12201.4854630613,0.560883991008953,0.229122880078809,2.4479615  
0788621,0.0143667002931143,0.0448482104250948,1.74124841683651  
"Ice2",802.221783227064,0.29554850217152,0.155408827347844,1.901748486  
33282,0.0572040437580384,0.128943911871047,0.605394979105719  
"Rora",3188.24673126595,0.566387228462465,0.107810886973454,5.25352535  
687724,1.49215121477764e-07,6.24065568814102e-06,6.78782543201112  
"Rp9",2924.41772810946,0.518739537260674,0.17239474858223,3.0090216873  
0066,0.00262090406376533,0.012249915808011,2.28361397699332  
"Itga11",57.9209904244001,-1.53305762005505,0.327479491771824,-4.68138  
512051689,2.84943060275961e-06,6.34950833058364e-05,-14.8163090835189  
"Fem1b",1767.52129515362,-0.253669687671251,0.121854310537072,-2.08174  
570561521,0.0373657034257694,0.0930184034661418,-0.602454833462188  
"Cln6",1382.80938700832,0.351361035062646,0.18802953347959,1.868648124  
36917,0.0616717856973418,0.136350660792241,0.700095760021128  
"Calml4",6577.30546701327,2.02873661765725,0.602706366769643,3.3660447  
7654812,0.00076254329266185,0.0047699933013541,10.8444297710878  
"Anp32a",12377.0986934726,-0.230883186315236,0.223658917899529,-1.0323  
0038168633,0.30193142233898,0.446722005254968,-0.186050009831915  
"Irak1bp1",567.94135028746,0.272871020023869,0.205397237793792,1.32850  
384433026,0.184011714420147,0.312231392216994,0.317624793667151  
"Glce",636.292545137194,-0.65732050826144,0.283155772731401,-2.3214095  
2635625,0.0202647518810805,0.0580635021568418,-1.87087746408525  
"Phip",4998.38162048188,0.423514077154452,0.314259256169616,1.34765824  
344047,0.177768328200298,0.304580567948102,0.503481850987571



"Kif23",701.59514333937,0.481868369732584,0.267121879395626,1.80392699  
700538,0.0712427521122628,0.152129140366323,0.907370433234755  
"Ankk1",5.78407745425451,-1.23553057030131,1.02025838491992,-1.2109977  
1250425,0.225896281397512,0.361946396145015,-1.25561925343548  
"Lca5",167.599021985181,-0.84575149368401,0.242652114199728,-3.4854486  
9049799,0.000491312437744648,0.00341205340562352,-4.80424145815078  
"Drd2",1.46068008793563,2.18200521989334,3.27661018623176,0.6659337229  
25624,0.505453464309382,0.640372426712432,0.972531411445824  
"Sh3bgrl2",2118.33315562676,-0.346874840831494,0.203837101608296,-1.70  
17257314523,0.0888067944674655,0.180163862087883,-0.594504799694115  
"Elov14",73.7679861821854,-2.46834130781768,0.597878383938142,-4.12850  
066857921,3.65136378343892e-05,0.000454915597760333,-18.9948703818613  
"Bckdhh",2345.85184935357,0.751458607106415,0.336866757116135,2.230729  
48348937,0.0256990534167992,0.0699734874348206,1.99860851284724  
"Zw10",1133.17023582568,0.175183639308415,0.132137034852619,1.32577244  
149461,0.184915083931825,0.313186787539992,0.203380409763446  
"Tent5a",2444.03308865072,-0.56244139495574,0.172056377069924,-3.26893  
663887369,0.00107952472508203,0.00623846268217232,-2.85552705017521  
"Usp28",706.619239100101,-0.0651416138220607,0.178909171553441,-0.3641  
04384679924,0.715780062734737,0.811600352593737,-0.0135981318722262  
"Tmprss5",29.145954787849,-1.1511785465919,0.522102728331273,-2.204888  
96940121,0.0274618867416812,0.0735624528215277,-3.00413917498357  
"Htr3a",40.1768629582066,1.21277985692257,0.906433279464628,1.33796925  
201034,0.180906460284385,0.308682433064229,1.42555269016319  
"Nnmt",602.739055264136,-2.54496950800871,0.529004535439107,-4.8108651  
9588386,1.50278351059216e-06,3.79550166962771e-05,-25.9055216943754  
"Paqr5",3355.44250472112,0.568140160099981,0.239253558610965,2.3746361  
9516647,0.0175662543305705,0.0520368925763389,1.67931001429399  
"Idh3a",6753.22272687925,-0.598269215172171,0.506620088698737,-1.18090  
3064284,0.237641233900058,0.375762612811882,-0.585584522148097  
"Tle3",5078.01109194529,-0.0557685555784819,0.12079375485051,-0.461684  
096561937,0.644307877364233,0.757337532725332,-0.0155006604923637  
"Acsbg1",473.844418814727,-1.80398887472909,0.292484913462774,-6.16780  
145468491,6.92460138705164e-10,1.18434980565555e-07,-28.7716412565025  
"Dnaja4",1379.38038496976,0.443917226141934,0.167750075938746,2.646301  
19335405,0.00813773234889045,0.028864745377236,1.57374618993602  
"Imp3",1940.24205130986,0.300197120253078,0.167695970995476,1.79012720  
74162,0.0734334638335912,0.155825765895617,0.558071484217871  
"Thsd4",861.118743338942,-0.649943988265488,0.241346086756309,-2.69299  
575974375,0.00708131696097599,0.0259923791613535,-2.37226429038135  
"Ptgn9",1725.2417948066,-0.426124183009759,0.12656517409543,-3.3668359  
8829852,0.000760358951786334,0.00475938325583626,-2.27875752744317  
"Crabp1",4.2208320667243,-0.107497629781519,1.28634152184964,-0.083568  
4986883945,0.933399513702563,0.958469755538897,-0.00455975608831309  
"Nr2e3",5.38616489156916,2.62218513489904,1.15847096908418,2.263487998  
2983,0.0236056236195714,0.0653781888259095,7.15218454140147  
"Ireb2",4220.51971254664,0.209358992487714,0.116338521930113,1.7995672  
3718289,0.0719289982313981,0.15312497079548,0.392862335399099  
"Pkm",25960.2292314466,-1.60662458595885,0.493007398974936,-3.25882449  
086841,0.00111874855061901,0.00641192217518209,-8.11280537464897

"Man2c1",4109.00973388706,0.0801054009171186,0.146311917165653,0.54749  
7445655258,0.584037024873843,0.707961076219471,0.0276656950216842  
"Celf6",3.66000660355344,-0.525315713228482,0.944912700438257,-0.55594  
1001729405,0.578251187578318,0.703264823814998,-0.184922558155945  
"Neil1",784.681628240594,-0.051399085433063,0.174474812283553,-0.29459  
3155082639,0.768304691699799,0.849989526276341,-0.00835395768660948  
"Commd4",2567.48492922727,0.0744429980066035,0.135187158149867,0.55066  
619511357,0.581862522271544,0.706159309053315,0.0258997922308704  
"1700017B05Rik",1304.96103025956,-0.34995075095966,0.162215118727439,-  
2.15732512299092,0.0309803408367677,0.0805850942630228,-0.881330522614  
882  
"Psm4",7719.13432875858,0.696155992412919,0.136497587262282,5.1001340  
4907475,3.39413014310951e-07,1.18278652441857e-05,7.89792617698702  
"Chrna3",2.42254554390399,-0.0785595123745368,1.75920578591162,-0.0446  
56238061329,0.964381315842794,0.978482952401665,-0.00170881979420161  
"Fam219b",1287.03050532417,-0.441707730365902,0.169926239782742,-2.599  
40860770323,0.00933845413106838,0.0321074199695947,-1.51888629247038  
"Mpi",1406.85906932534,0.319761546245616,0.0906490546435617,3.52746697  
142006,0.000419556101648035,0.00300975160777534,1.85650283419696  
"Ube2q2",1938.41632442437,-0.0435590623284504,0.209737595114927,-0.207  
683616781159,0.835476010679805,0.894913544813209,-0.00483628268745556  
"Ulk3",1312.08148876616,-0.0903730570041553,0.130781225022645,-0.69102  
4701661165,0.489550017933754,0.62612722474937,-0.042312818391014  
"Fbxo22",3048.44264141443,0.568265068964509,0.139926898141126,4.061156  
76480854,4.88301681291196e-05,0.000569491712762559,4.24537554200805  
"Cyp1a2",3.53268455876917,2.82031630455403,1.27188059353015,2.21743795  
675516,0.0265931783610034,0.0718561241245626,7.42614506553145  
"Nrg4",351.572312840516,-2.4938848181148,1.02783491398832,-2.426347640  
24289,0.0152516528130943,0.0467330534674629,-7.63952629552467  
"Csk",3644.85966895112,-0.478942030135602,0.133302196838295,-3.5929042  
5435819,0.000327012769888367,0.00247615339311976,-2.87415457859468  
"Tmem266",12.1161880961632,-0.708027755784771,0.582109099845678,-1.216  
31452930812,0.223865128841208,0.359919295794712,-0.723516182271383  
"EtfA",12899.2869999935,0.356219831754113,0.535179420342223,0.66560823  
943179,0.505661538540286,0.640469577657431,0.158715048582936  
"Cyp1a1",123.467479384863,-1.11246965464322,0.553169720991658,-2.01108  
197435122,0.0443167988180478,0.106114324371153,-2.49553446375448  
"Clk3",4945.11685241491,0.196154793067475,0.163510823886656,1.19964408  
719173,0.230277596570983,0.367078381195377,0.196582387172281  
"Isl2",1.81082726137536,0.452930009900215,2.01411280173145,0.224878174  
40555,0.822074048756174,0.885911667642064,0.0548670497015733  
"Rcn2",2056.83571878441,-0.486141735817284,0.165349090845944,-2.940093  
18908334,0.00328113548066725,0.0144551552586898,-2.05963871581974  
"Pstpip1",938.859542496779,-1.09235065851875,0.350123669654365,-3.1198  
9949036321,0.00180912758805049,0.00925108043844964,-5.11549444277207  
"Cyp11a1",7.02437660907392,-0.61382170797214,0.789005555859096,-0.7779  
68803152203,0.436587404847384,0.578575492402249,-0.335874794905567  
"Tspan3",8392.2118529222,0.697717285446335,0.174518841684816,3.9979481  
7975256,6.3893934273585e-05,0.00069858672145787,5.06992862920959  
"Stra6",1035.92052171033,-2.06156500691958,0.641074883250242,-3.215794

38031868,0.00130084000632293,0.0071892796041056,-10.1741620374992  
"Tmem30a",8926.00700453762,0.379708279417363,0.104422693090916,3.63626  
208229248,0.000276622896218366,0.00216776444928953,2.32915293183878  
"Hmg20a",2347.28729716701,-0.103282893558916,0.12804475035567,-0.80661  
5603310776,0.419887981314091,0.562872180107401,-0.0593569588430749  
"Cox7a2",8837.97334878912,0.661139643911721,0.437916610034996,1.509738  
67800741,0.131110117796461,0.241559289207569,0.939241643261859  
"Col12a1",1670.20017613708,-1.79380142326062,0.357529302965482,-5.0172  
1511602591,5.24258567278244e-07,1.63828482480969e-05,-19.7663922706096  
"Stoml1",1759.67201704884,-0.158303688868056,0.187193117613066,-0.8456  
70454590505,0.397736609712145,0.542209017230218,-0.0968982754585769  
"Loxl1",2364.39532912822,-1.38407581409465,0.327327678585023,-4.228410  
56423261,2.35348034352015e-05,0.000326606119131359,-11.109638349387  
"Nptn",4969.88490048009,0.280320093943887,0.221758674445032,1.26407724  
363166,0.206202303565945,0.339250486306313,0.303030659952029  
"Hcn4",29.8713998752989,-1.65158763436518,0.744167854219411,-2.2193751  
3828462,0.0264612136123473,0.0716385369360662,-4.35378670340619  
"Neo1",1997.11910489877,-0.264136649668422,0.128336086295632,-2.058163  
5087419,0.0395744402418854,0.0971027284100131,-0.615962917635903  
"Mto1",786.191055057233,0.193287029040493,0.20694722528063,0.933991885  
024727,0.350308078994232,0.495306507749544,0.135799311023285  
"Impg1",0.616810550281104,1.11885979253143,2.63717983823622,0.42426374  
4288192,0.671373477114436,NA,NA  
"Cgas",271.441324619714,-0.792671534720797,0.315397180155095,-2.513248  
64201704,0.0119624990303624,0.0388841456890613,-2.57393817890825  
"Ooep",6.72124953599769,-2.29060903920176,0.896142687250797,-2.5560762  
4967507,0.0105859919118819,0.0354587992265716,-7.64922281308964  
"Gsta4",6913.29187553164,-2.27402691580699,0.685926181003367,-3.315264  
78910684,0.000915563546107882,0.00550236700945189,-11.8307999339225  
"Elavl5",4491.26107275705,-1.59447009133989,0.458900532648441,-3.47454  
399788503,0.00051172243632954,0.00352688726177214,-9.00451407600725  
"Gcll",8433.28332699322,1.29312666639571,0.303821847683729,4.256200389  
321,2.07930357540536e-05,0.000296145077525594,10.5062159198777  
"Lrrc1",1767.12482307865,0.272040440526228,0.202381507680749,1.3441961  
355252,0.178884970996701,0.306063457747778,0.322085767192638  
"Tmed3",2422.60862895975,-0.305583997307903,0.26034944181152,-1.173745  
54437928,0.240496961756739,0.378817175930462,-0.296630867693266  
"Mlip",11.5997173663077,-1.19368700266256,0.585784409332537,-2.0377582  
3262808,0.0415741173008905,0.100784799096452,-2.73923442218172  
"Rasgrf1",7.50491898481644,-1.15962085658633,0.902880003906308,-1.2843  
5766831609,0.199016837447308,0.33036185054892,-1.2843574551702  
"Tinag",3074.92740205599,1.91609797746433,0.568527570003974,3.37028154  
58025,0.000750914186194565,0.00471388435364509,10.2650024910742  
"Fam83b",21.3916235145274,-1.91539737433339,0.699010204485924,-2.74015  
652710254,0.00614099306023748,0.0232795456314746,-7.20223923202752  
"Ctsh",8063.20622503968,0.15652924082746,0.19170858658257,0.8164957220  
63247,0.414216669263481,0.557646662797719,0.0914177315039157  
"Hcrtr2",1.58999202386541,-2.76128227319328,1.86041802581974,-1.484226  
78928657,0.137748765041535,0.251199534304139,-3.81473271752573  
"Adamts7",462.423246861437,-0.91419450336711,0.316005864982379,-2.8929

6688660537,0.00381621528218104,0.01620395591724,-3.7687667250628  
"Tpm1",13844.872316118,-0.891162051092021,0.241882838780239,-3.6842715  
0758588,0.000229357663872107,0.00188533546803471,-5.59083836230277  
"Zic1",5.82183910208689,0.870156140313366,0.895713113536716,0.97146745  
6669872,0.331315551173728,0.476154685397313,0.645666740216714  
"Plscr1",2147.8566542371,0.0516553067949143,0.414992375874073,0.124472  
905522941,0.900940851784832,0.939378270034268,0.00323036985328054  
"Lactb",2458.20077301182,0.937994698786301,0.141374082726983,6.6348419  
7876441,3.2485036062477e-11,1.05565538857696e-08,17.2276974088535  
"Plscr2",8802.062267091,1.40386708771361,0.481353478141261,2.916499311  
76278,0.00353983504110021,0.0153459361383661,5.86381887776957  
"Car12",6604.23663981929,1.56304307154595,0.551894547942074,2.83214080  
909893,0.00462374822495172,0.0186692571733503,6.22228238452354  
"Plod2",2681.89009905313,0.192622516150182,0.282758625741774,0.6812259  
5957901,0.495728524361505,0.631580944066951,0.0885156645737918  
"Aph1b",620.264202769946,0.0464223824764286,0.239867591551966,0.193533  
366371303,0.846541277394047,0.901940400842908,0.00479110719436554  
"Usp3",2152.71246984423,0.322081201577295,0.114096953172901,2.82287293  
937831,0.00475954302828723,0.0191264571239786,1.27437312236097  
"Plscr4",1117.9565255522,0.0844621271071133,0.0957903445176329,0.88173  
9464790898,0.377917714191838,0.523058907526772,0.0547366263804545  
"Dapk2",692.815994919949,-0.704271261091815,0.163824150236882,-4.29894  
652329021,1.71611869669989e-05,0.000254455379074179,-5.82882014711342  
"Ciao2a",2776.10468494324,0.378990868060122,0.222343780304564,1.704526  
51088771,0.088282767575533,0.179380721361791,0.651199087110596  
"Snx1",3684.17675769461,0.10763225177534,0.0828149517778137,1.29967173  
155048,0.193713502983354,0.323957962189676,0.1213167796449  
"Ppib",10250.4318941057,0.313434034288736,0.194207549797933,1.61391271  
665214,0.106546359937292,0.206648853681222,0.49420218800875  
"Csnk1g1",1056.72474078635,0.277138167171691,0.256844438812506,1.07901  
174910779,0.28058249007547,0.424388906329339,0.237536512166278  
"Trip4",2326.11694145728,0.0879994772765115,0.157737494182432,0.557885  
604387344,0.576922502231529,0.702204143630637,0.0311105532627834  
"Rbpm5",3518.04083803947,1.11997364898398,0.301425533020976,3.7155898  
4323348,0.000202730212998398,0.001711924509763,7.13438568905462  
"Spg21",2857.93349838455,-0.211729991241229,0.223693051699752,-0.94652  
0196458405,0.343883326060752,0.488491701262753,-0.151690309589566  
"Parp16",647.375294544176,0.189959567242789,0.127053215039859,1.495118  
14544162,0.134883611032016,0.24702146318548,0.265616673304101  
"Dpp8",2770.52262976207,-0.431128695231107,0.205441586458675,-2.098546  
36864299,0.0358569083203532,0.0901299469421487,-1.03751241011947  
"Igdcc3",62.4340959261678,-1.04555205884889,0.467714905127186,-2.23544  
737913489,0.0253879925783486,0.0693104283523719,-2.79074563180316  
"Dis3l",1125.44258251187,0.0903347340299668,0.189571953171971,0.476519  
50891712,0.633704312062595,0.748710336096254,0.0261431524679171  
"Tipin",528.186354929979,-0.326189686330261,0.210679442422849,-1.54827  
487000641,0.121556132136476,0.22886263657754,-0.481010172168974  
"Snapc5",1728.81218199117,0.193551911608471,0.181341474833674,1.067333  
94434999,0.28582106521148,0.429958470493484,0.163370714640169  
"Rpl4",30420.7161015776,-0.205847862588938,0.229966142669085,-0.895122

47411632,0.370721621313838,0.515830312736545,-0.136266636756486  
"Zwilch",224.833457865567,-0.889426469750365,0.366686496569814,-2.4255  
7737487076,0.0152840572974314,0.0467757886023101,-2.72377032421667  
"Lctl",424.133050052191,-2.11771155244776,0.60095219558527,-3.52392680  
81637,0.000425201684592602,0.00304018424869327,-12.2739113040732  
"Smad3",2387.65883910008,-0.584907045607289,0.145330016627619,-4.02468  
161209948,5.70524509093223e-05,0.000640419509401247,-4.30104793141688  
"2300009A05Rik",670.414505330411,0.894237447161912,0.293116057547378,3  
.05079651604339,0.00228235195547854,0.0110589707822864,4.0281045142300  
6  
"Pias1",2560.32733165916,0.0572554846137127,0.102199284606918,0.560233  
712338892,0.575320034913104,0.700967946056096,0.0203424797093249  
"U2surp",5521.14975340284,0.462703030352547,0.231022581721062,2.002847  
63032913,0.04519364564807,0.107514116989516,1.03188935234506  
"Atr",1097.74147854193,0.55349463473816,0.272539293721905,2.0308801244  
0121,0.042267156456956,0.102236076987685,1.26222827482745  
"Xrn1",1776.23398573632,-0.0521871464814788,0.154709611239689,-0.33732  
3234563791,0.73587324640945,0.827406525488233,-0.0098873317999228  
"Tfdp2",1579.35844734442,0.504462321987507,0.166750789611437,3.0252469  
7581945,0.00248430172541599,0.0117655853879429,2.24111245745768  
"Atp1b3",5514.52892695207,-0.527390092954372,0.177437493150741,-2.9722  
5847586975,0.00295617695965031,0.0133910058387729,-2.27472418382591  
"Rasa2",1580.62000700459,0.472359084168964,0.182588191282673,2.5870188  
0362944,0.00968103089563817,0.032971308367363,1.61174471585277  
"Ube2cbp",74.9262417483219,-0.231366569969301,0.303168228262438,-0.763  
162325073912,0.445366594294425,0.586502540139127,-0.123452176427108  
"Rwdd2a",40.6946269294454,-0.82034034365661,0.417933086810084,-1.96285  
091931328,0.0496634991665296,0.115733107057367,-1.76903814320093  
"Me1",33343.2241654925,-1.47699219029246,0.789912257700333,-1.86981804  
104727,0.0615090901834768,0.136098983249822,-2.94567310915789  
"Tbx18",127.9447444494328,-3.18826651379956,0.958583799527721,-3.326017  
52227647,0.000880963903329332,0.00534805466457168,-16.6778935454245  
"Nt5e",3468.5209360899,0.500774180569241,0.33462830340821,1.4965087396  
0399,0.134521132152433,0.246535673908087,0.701208332355233  
"Snx14",1513.98831313502,0.12416236304305,0.169026538175778,0.73457318  
8228753,0.462599471877381,0.601895504436738,0.0630336843249953  
"Syncrip",4447.58209521253,-0.489547379560558,0.15116054732364,-3.2385  
9226648883,0.00120121160824508,0.00675937198775254,-2.44618272902622  
"Zfp949",882.620903977103,0.158440382892913,0.102820463377185,1.540942  
12074976,0.123330873257183,0.231177212725298,0.232047143736288  
"Crtap",2536.17910431679,0.14958648052566,0.169407468351317,0.88299814  
6312225,0.377237273054875,0.522547055273086,0.0970876454094923  
"Cmtm6",7835.58068325433,0.567895888745712,0.136718649986108,4.1537558  
2485211,3.27062177566868e-05,0.000416801198575085,4.41987758937666  
"Dync1li1",2623.86092184789,0.206662652060514,0.127538887023183,1.6203  
8933288597,0.105148669845293,0.204773148685929,0.327736484324628  
"Cmtm7",1075.06619341319,-0.761992192024934,0.31887022533819,-2.389662  
41271594,0.0168638657655302,0.0504235017169617,-2.27629768166865  
"Stt3b",6089.62686553876,-0.470338147958348,0.286509350485232,-1.64161  
535098866,0.100669744270893,0.198348693794854,-0.760879528840193

"Tgfbr2",5401.0184251806,-1.21990750708125,0.229601946754107,-5.313140  
95689141,1.0775162428247e-07,4.81867240885228e-06,-14.9353423721366  
"Zcwpw2",41.1276675389103,0.281026118872324,0.287120795769102,0.978773  
126201282,0.327692090916143,0.472420504860408,0.210737493128768  
"Eomes",70.5604879176593,-1.24304211774954,0.52703020742278,-2.3585785  
0317179,0.0183450791715088,0.0537479118987345,-3.63397205233222  
"Slc25a36",5653.01354239223,0.338778534783181,0.158588784853722,2.1362  
0739383091,0.0326625130571137,0.0839622517584184,0.839285864862141  
"Clstn2",189.775909314934,-0.752174700632455,0.337339593550458,-2.2297  
2551996019,0.0257656705922266,0.0701059231380456,-1.99909080096216  
"Rbp2",1.80512612738153,2.14085930821118,1.28335493215225,1.6681739825  
6369,0.0952811940853151,0.190328114155873,3.55169796567093  
"Nmnat3",821.49787567334,0.307171670415958,0.183010935265079,1.6784334  
2241293,0.093262517494715,0.18700458310489,0.515010827653148  
"Copb2",5199.87104539264,0.189003555818567,0.143293217191778,1.3189986  
206089,0.187169573620057,0.315940814340219,0.217769968708701  
"Mrps22",816.049134746048,-0.0404462933626951,0.295271393058111,-0.136  
980060763065,0.891046555740723,0.932561768321665,-0.00282395576040192  
"Pik3cb",1210.02630933457,-0.558836872206622,0.323133766602443,-1.7294  
2889281568,0.0837323626514486,0.172180300250785,-0.983113142959389  
"Faim",665.467287839343,-0.237776267334772,0.117456489453666,-2.024377  
43917564,0.0429313312602769,0.103508729678852,-0.539300191469247  
"Armc8",1681.04808053243,0.0376702067077997,0.0642835510619004,0.58600  
0712243261,0.557875036211368,0.686782595104151,0.0141541090026174  
"Dbr1",662.389262539116,-0.0355989927404107,0.123409083441611,-0.28846  
3310379044,0.772992111469462,0.853169927663183,-0.00565299685804089  
"Mras",774.462280779019,0.215122644656637,0.152012116103288,1.41516775  
222356,0.157019317093694,0.277717946724677,0.275604217108623  
"Clndn18",23.9587530785208,1.3285658659655,0.98721512093264,1.345771390  
44465,0.178376254713156,0.305353837962872,1.57605649660863  
"Nck1",1409.13735829647,-0.806335629602426,0.295045665599337,-2.732918  
06529165,0.00627759465638255,0.0236705744749849,-3.01853564097308  
"Cdc25a",772.69896797904,-0.442216243420416,0.134037399002989,-3.29920  
04224922,0.00096960657665457,0.00573585832269745,-2.28228593719956  
"Nme6",525.146989725332,0.262980480032176,0.125863363715841,2.08941245  
703476,0.0366706108357864,0.0917370979391868,0.62821524561907  
"Map4",6801.46709617757,-0.158520655633238,0.167701340243759,-0.945255  
746929771,0.344528325059243,0.489051636721398,-0.113387795674646  
"Dhx30",3466.85782635405,0.672967628866753,0.231391641113307,2.9083489  
1713835,0.00363342694388484,0.0156322426263145,2.79848182022092  
"Smarcc1",2384.94375476213,-0.0397459772696844,0.148941741963216,-0.26  
6855864217704,0.789580139888337,0.864369894061783,-0.00579315439480048  
"Cspg5",254.736542696691,-0.77023569132255,0.46497779136145,-1.6564999  
5684161,0.0976206137923122,0.193671828217593,-1.26441133131496  
"Ngp",1.14066404264284,1.47076785152593,2.3707317629165,0.620385601834  
842,0.535003949409786,NA,NA  
"Scap",2957.41965573859,0.0413555156207363,0.140389430039085,0.2945771  
3169163,0.768316933643171,0.849989526276341,0.00672156371446473  
"Ptgs2",64.3576651875284,-0.386236740813968,0.41462204943723,-0.931539  
317164175,0.35157465647228,0.496616477601309,-0.27034147280026

"Kif9",234.50344815129,0.331034509021631,0.262992473232069,1.258722369  
32622,0.208130628755951,0.341354022868744,0.35580752616423  
"Nradd",553.074819210889,-0.939235521551657,0.159480051335302,-5.88936  
054188335,3.87692807259649e-09,3.99053761831314e-07,-13.8388555512589  
"Pth1r",16941.7223097963,1.42275916408865,0.271745334895208,5.23563418  
167712,1.64419322828522e-07,6.6479685193027e-06,16.9609954596411  
"Prss44",0.819588041308358,1.20509834952674,2.66227406908707,0.4526575  
0942764,0.650795380545834,NA,NA  
"Tdgf1",2.6767164462349,0.217458625597938,1.43574532888952,0.151460444  
427239,0.879612511586482,0.924764625844561,0.0170087509046018  
"Lrrc2",12.0290833265373,-0.633265036015712,0.549909302773877,-1.15158  
087492132,0.249493344090556,0.389107440655707,-0.597738725922945  
"Ltf",43.4145108118872,1.06017186538982,0.713856435718395,1.4851331617  
1607,0.137508553089902,0.250855330103566,1.46608928193136  
"Lrrfip2",2761.24863399742,0.399879293234396,0.1429093763039,2.7981319  
6010347,0.00513991087765109,0.02029114846982,1.55855774646641  
"Mlh1",718.874685646305,-0.0355780067908356,0.114658568495874,-0.31029  
5229197074,0.756336458789667,0.841774546120265,-0.00612806477778294  
"Dclk3",1017.28611294219,1.22396357901679,0.500759829608552,2.44421278  
754242,0.0145168616182781,0.0451795319765662,3.79075121971398  
"Trib1",1864.73356319421,-0.41481307503895,0.136836384417727,-3.031453  
05105862,0.00243379766049015,0.0115829834967607,-1.84932719982984  
"Stac",111.653896361981,-1.48671017031652,0.347224700678333,-4.2816947  
2797329,1.85475315065903e-05,0.000272297698950739,-12.2038308230224  
"Arpp21",6.64214736352347,-0.23324263085301,0.80445758099913,-0.289937  
76224139,0.771863851730933,0.852438480943061,-0.0372381739253401  
"Pdcd6ip",7575.18354980897,-0.233545015448663,0.0923133946288925,-2.52  
991471484212,0.0114090254917831,0.0375765505133085,-0.766348793681833  
"Fbxl2",320.181181351768,0.99971793629299,0.358111444241013,2.79163917  
369859,0.00524417997180847,0.0206384215803105,3.87950623846387  
"Myd88",1691.13581541557,-0.601613191009013,0.0993356425504269,-6.0563  
6784101546,1.39229426166063e-09,2.0411243243503e-07,-9.26760746724023  
"Scn5a",55.1713295406138,-1.38915221859418,0.396668962974257,-3.502044  
14325286,0.000461703116105963,0.0032440675163366,-7.96113041543927  
"Wdr48",2340.85976336782,-0.0288378397735525,0.140432511896189,-0.2053  
50167024501,0.837298551480184,0.896217774522174,-0.00315981526993339  
"Gorasp1",1284.4445723389,0.270393826533357,0.178118440626497,1.518056  
33140678,0.129000198463985,0.238774052558455,0.387268194622312  
"Ttc21a",16.3019797119918,-2.13545432133844,0.652422368153578,-3.27311  
635157757,0.00106368681665939,0.00617622559595735,-10.8631585043726  
"Csrrp1",642.421061609715,-0.539703065396875,0.133053103868328,-4.0562  
9819753003,4.98565997669341e-05,0.000577945292660929,-4.02404297159161  
"Mobp",0.126704868686727,-0.545572912234532,4.78471990596623,-0.114024  
002022404,0.909218766666244,NA,NA  
"Rpsa",37638.1814974369,-0.115774225816367,0.201276046954897,-0.575201  
210317441,0.565155224334148,0.692695283132211,-0.0425082532741461  
"Slc25a38",1602.07980143711,0.473984663756834,0.165685912441111,2.8607  
4209191019,0.00422650725001032,0.0174816373272595,1.91802835220236  
"Hhatl",264.862274337565,1.56693541094793,0.676126420601683,2.31751838  
591594,0.0204755102812576,0.0584868882894755,4.44845548691346

"Nktr",6301.00131792055,-0.328488959152263,0.20229680972292,-1.6237970  
3170892,0.104419133782946,0.203901533173698,-0.522336233746717  
"Ss18l2",1125.80139600386,1.01147200308429,0.303254162497787,3.3353936  
3401706,0.000851787326474445,0.00521121722359546,5.31724947109047  
"Pccb",11800.4189864993,0.770389147431027,0.39386093032596,1.955992808  
91723,0.0504660012259035,0.117252870817763,1.6512693455898  
"Vipr1",124.559974873682,-0.646866643675128,0.299134453319643,-2.16246  
118257703,0.0305826460247975,0.0798153436208676,-1.6353044374776  
"Lyzl4",3.39642261126466,-0.829128992058428,1.46350187581561,-0.566537  
703681695,0.57102830983443,0.697525998317987,-0.298665108143316  
"Amotl2",5344.48660238436,-0.289613609930275,0.190776681479841,-1.5180  
7656828792,0.128995097382807,0.238774052558455,-0.414795490317571  
"Cck",415.96419479433,-1.30434052922785,0.592171914709148,-2.202638282  
6151,0.0276202534192845,0.0738838936986157,-3.39814675764261  
"Cep63",2149.76123423869,0.251792832976379,0.144903659144094,1.7376568  
2981127,0.0822712997406622,0.169892586564651,0.446325177148898  
"Trak1",5088.54459397665,0.10017167314748,0.216810488899864,0.46202410  
9884025,0.644064030886734,0.757096549962594,0.027874219620404  
"Ephb1",290.084198398459,-0.560356231539166,0.263789343094036,-2.12425  
65183515,0.0336486994973203,0.0858521778066935,-1.37574645579519  
"Abhd5",2344.15119021776,-0.389016613111398,0.452727519430874,-0.85927  
3175177053,0.390189820079552,0.534414239386844,-0.243751590005064  
"Ryk",3347.95959797907,-0.0936477983692468,0.0882783418331321,-1.06082  
416620675,0.288769817533546,0.432692534200459,-0.0784513721457181  
"Slco2a1",2874.70616390572,-0.21995790519553,0.315364138665934,-0.6974  
7278852315,0.485506963047594,0.622757312967028,-0.104171707983785  
"Rab6b",1562.71939060198,-0.119648369903548,0.175710778458027,-0.68093  
9273922397,0.495909915960123,0.63177076389353,-0.0549459612987736  
"1110059G10Rik",789.317003024728,0.159247524346669,0.130380114175753,1  
.22140960953602,0.221930970601789,0.357798087050907,0.163672448410981  
"Srprb",1990.13222934588,-0.113948647240423,0.135420822748721,-0.84144  
1108741894,0.400100863831794,0.544242126621481,-0.0693219181623642  
"Trf",13836.981295885,-2.74076616567912,0.62528456203158,-4.3832301836  
6908,1.16932447806291e-05,0.000192076568435304,-23.454425683945  
"Topbp1",1477.62840672899,-0.114814866669547,0.196727636962972,-0.5836  
23472746524,0.559473664336792,0.688067207470593,-0.042925691893615  
"Bfsp2",12.4898988751315,-1.85708447127478,0.984811197693418,-1.885726  
39671885,0.0593318338631964,0.132438705971906,-3.75434759096957  
"Uba5",3775.23982945939,0.331755582850806,0.168020489899687,1.97449479  
553876,0.0483255086438823,0.11346950476137,0.721973518909581  
"Nphp3",941.798243168006,0.379662986410382,0.289867791863828,1.3097798  
2744884,0.190270329280055,0.319861983585881,0.4327648072338  
"Dnajc13",3869.87196446988,0.818564597735455,0.191550738461873,4.27335  
65232294,1.92552203489149e-05,0.000280177825644136,6.69592885906962  
"Acpp",382.633926633905,-0.247784297559514,0.301053128988974,-0.823058  
369768978,0.410474801115533,0.553947790154393,-0.146362427730887  
"Gnai2",12403.0974121224,-0.574921378256531,0.141041041867551,-4.07627  
007461011,4.57638629627195e-05,0.000540945058729681,-4.32466947468359  
"Mrpl3",1536.21087854095,-0.191177155337741,0.2073973297212,-0.9217917  
87747397,0.35663719187067,0.501710820136675,-0.131860883324455



"Cpne4",254.259048660106,1.69276048347616,0.691947184689573,2.44637238  
351592,0.014430187255954,0.0450031655656737,5.24928825459256  
"Nudt16",601.602298250458,-0.000737561654491029,0.138201983675815,-0.0  
0533683840762484,0.995741839244444,0.997173825453938,-2.08742908491759  
e-06  
"Aste1",509.608041041996,0.426825952448753,0.115802290812411,3.6858161  
3933849,0.000227970894678465,0.00187551751242224,2.67998494592302  
"Atp2c1",3444.00940432224,-0.177083463731897,0.127990158392527,-1.3835  
7093979685,0.16648987164823,0.289582472559963,-0.219462218218642  
"Pik3r4",1377.37109216524,0.358865505986917,0.122326612637643,2.933666  
6670396,0.00334983750663827,0.0146973743709345,1.51444344676135  
"Col6a4",218.043102939127,-2.94361875750032,1.06539442346704,-2.762938  
01869274,0.00572836432111828,0.0219995366423408,-11.2350094638011  
"Manf",4482.06464152463,-0.690019073066709,0.288639283117549,-2.390593  
08079593,0.0168211846659972,0.0503267544295861,-2.06261774135468  
"Mapkapk3",1947.72964343508,-0.487217607549208,0.122415556410918,-3.98  
00301680102,6.89065231961571e-05,0.000742711683730168,-3.5105015882637  
9  
"Cish",1579.08951140811,0.237562846138196,0.239799203778965,0.99067404  
0590933,0.321844770912766,0.467055009263894,0.180858551188639  
"Hemk1",893.116601655207,0.237815479923212,0.24556269181786,0.96845118  
5164583,0.332819086998199,0.477541140502678,0.175770601882334  
"Rbm5",8588.78842338206,0.0366222855670128,0.158242926220295,0.2314307  
90884326,0.8169801466965,0.882813062529836,0.00456466788636773  
"Rbm6",3930.11594294646,0.0870636177199009,0.141730033965968,0.6142919  
41401825,0.539022426782276,0.67001525420125,0.0348650435683427  
"Mon1a",1283.95914216435,0.255533586845573,0.153321924602503,1.6666473  
9898133,0.0955845379955976,0.190716039260532,0.423411401183807  
"Mst1r",280.390165295184,-2.2360441930398,0.636554430579326,-3.5127305  
4686743,0.000443527026876326,0.00314354415486536,-12.8849909051481  
"Traip",84.0807480125358,-0.863761467419578,0.292470836951041,-2.95332  
511242538,0.00314370682564283,0.0139977153885325,-3.68727777045779  
"Bsn",55.7242212561557,-0.675945201178697,0.338332540528762,-1.9978722  
7123438,0.045730509540704,0.10848685667656,-1.50135962987305  
"Apeh",6173.02005705699,1.39705934144308,0.281481485535888,4.963237062  
58456,6.93278762055758e-07,2.04192587652012e-05,15.0868885974827  
"Mst1",30.5157184246779,-1.82928513607838,0.812130175321067,-2.2524531  
0624641,0.0242936529511841,0.0668752852240841,-4.94808057612659  
"Amigo3",79.4362878701948,-0.409525515487017,0.248159124466069,-1.6502  
5370865625,0.0988910559344379,0.195634923763156,-0.668142922242935  
"Ip6k1",7282.97424810104,-0.0649060106333077,0.120374137843979,-0.5392  
02288762677,0.589747281267408,0.713153838386996,-0.0219420039137116  
"Cdhr4",23.9997145275935,-0.845894212328044,0.51184688511755,-1.652631  
35700001,0.0984059122896428,0.194872890292855,-1.38338197387953  
"Uba7",3190.21338194051,-0.715612225873984,0.266135502798171,-2.688901  
77503557,0.007168750976681,0.0262441431737375,-2.60505208236158  
"Nckipsd",1137.7821124041,-0.0216397305060837,0.239793522627822,-0.090  
2431820048377,0.928093970016233,0.955739739483284,-0.00097962285360860  
3  
"Ip6k2",4535.33848995113,0.403283140469998,0.174182062925117,2.3152966

1377001,0.0205967049533434,0.0587470089497204,1.14311212653574  
"Prkar2a",3423.421312885,0.453369342646552,0.0882416190824202,5.137817  
58948793,2.77947478633614e-07,1.00174120857638e-05,5.21881872587212  
"Slc25a20",3712.75236925395,-0.169474305598048,0.459640820447493,-0.36  
8710301737459,0.712343669286279,0.809209791642034,-0.0358772145054673  
"Qars",4070.2571655782,0.322819151010223,0.110902225802498,2.910844653  
24547,0.00360453182002473,0.0155420525048302,1.34428540163096  
"Nicn1",1388.1032884071,-0.0498625063871342,0.236004063044541,-0.21127  
8169298822,0.832670216805049,0.892938284416723,-0.00564632106874173  
"Amt",2414.69198193427,0.797079368050624,0.190542146195825,4.183218169  
65075,2.87411331113987e-05,0.000377370110037745,6.28280605142557  
"Klhdc8b",3012.74571571593,-0.535071790555384,0.187540853056089,-2.853  
09457558752,0.0043295734115949,0.0178070294681291,-2.15535584633683  
"1700102P08Rik",63.4673623473256,0.223253134082816,0.349553218845452,0  
.63868138539878,0.523030224662506,0.656160296002415,0.0940677451561191  
"Usp4",4943.98605813155,0.231534403242601,0.107300534431081,2.15781220  
91397,0.0309424352536362,0.0805387268155652,0.58323912836562  
"Nt5m",816.482058507288,0.342880869932963,0.139328330325028,2.46095585  
250383,0.0138567415625888,0.043598313214032,1.07415552512756  
"Srek1",7629.83789977752,0.68516324007271,0.235584518182266,2.90835427  
285003,0.00363336471165553,0.0156322426263145,2.84919628965807  
"Oas1d",0.115678569700437,-0.0595056820677523,4.78471990596051,-0.0124  
366072073778,0.99007727891101,NA,NA  
"Eml4",1684.46265643372,-0.430789453896304,0.211265441428244,-2.039090  
9700327,0.0414409492650428,0.100574511920563,-0.989461520286093  
"Thsd7a",1260.26743482674,-0.39688565114539,0.262737665764817,-1.51057  
767065896,0.130896086601123,0.241298278958938,-0.564260838964596  
"Flcn",2672.56934475968,0.225992702387393,0.154806616317934,1.45983878  
313871,0.144334386872812,0.260311893002136,0.304157878252026  
"Atxn2l",6772.09002141166,-0.273444465992757,0.175512673707891,-1.5579  
7561632418,0.119239028445702,0.225414250206932,-0.407381792208289  
"Chsy1",1027.28374062298,-0.639760099537087,0.193920400492265,-3.29908  
610911004,0.000970001516882135,0.00573645422389077,-3.30174684829953  
"Gpr19",222.195258304881,0.111442723736418,0.128799673759334,0.8652407  
29915609,0.386906674461891,0.531277002412613,0.0704843724964041  
"Fhl3",515.138612017527,-0.696862714627878,0.259430831533171,-2.686121  
4240019,0.00722868137271485,0.0264188996073466,-2.53217306411619  
"Pygm",506.887765313821,-0.747339901912843,0.255349920732312,-2.926728  
54477324,0.00342547720894437,0.0149619073969528,-3.14050746970136  
"Colgalt2",508.132436989772,0.703830969411034,0.208383232985555,3.3775  
7966093089,0.000731267685813254,0.00462630023945063,3.7837937534536  
"Crebl2",1539.22001722467,-0.023479426737481,0.18188913235868,-0.12908  
6473903126,0.897289224719621,0.9368324125078,-0.00153205297761492  
"March3",196.072863269274,-0.139692034694548,0.328684384707101,-0.4250  
03563278587,0.670834077170158,0.777363772534395,-0.0351810006477218  
"Fam189b",674.485676488645,-0.565746545261178,0.271511926215031,-2.083  
68948336037,0.0371884214526469,0.0926763601078359,-1.34570841128593  
"Oas3",217.514864641674,-1.44158448918869,0.529421249537158,-2.7229441  
4032112,0.00647029970222818,0.0242331739519872,-5.3627415262041  
"1700025G04Rik",963.858590391844,-1.15890623624325,0.298092557810668,-

3.88773958248003,0.000101182097880732,0.00100043029638869,-8.004942105  
34419  
"Pon2",1750.4661325983,-0.855401510045626,0.28653029540711,-2.98537894  
162378,0.00283227219646589,0.0129405701951478,-3.71876219694551  
"A930018P22Rik",2.13998045292294,-1.34246725468711,1.38773984745423,-0  
.967376743666925,0.333355731673922,0.478060352875084,-0.99076539200257  
3  
"Prorsd1",889.734273679294,0.1225601257473,0.22354974755719,0.54824542  
2267567,0.583523397120661,0.707558407777279,0.0423978490757422  
"Cd59a",3250.56093096004,0.120733320394506,0.214905955059371,0.5617960  
67313033,0.574254971855819,0.700020221396983,0.0430590626244784  
"6820408C15Rik",48.1029887272419,1.21291904761308,0.443643145277943,2.  
73399704362205,0.00625706062160969,0.0236276808999876,4.54278978018688  
"Malt1",1557.72792536056,-0.191367301812214,0.176611102227719,-1.08355  
193642056,0.278563511252452,0.422285130026459,-0.16497287667799  
"Oas2",1220.33233611024,-0.70716728702052,0.447523085559891,-1.5801805  
7579262,0.114065518784331,0.217915881369478,-1.07747271847239  
"Nlrp3",131.050071736829,-1.44697659328503,0.50814623949884,-2.8475593  
8509377,0.00440558737524169,0.0180273122019858,-5.8108660232347  
"Lmo2",1827.95196154954,-0.679833953202273,0.28338669762673,-2.3989621  
2100165,0.0164416154100191,0.0495025659766141,-2.04339783356129  
"Kank1",3107.72477520624,-0.108065982702315,0.190934941725901,-0.56598  
3270141569,0.571405153383927,0.697724053148785,-0.0388963613804595  
"Exd2",1377.78640851556,-0.073548751619601,0.155115963258001,-0.474153  
337121526,0.63539056603166,0.750111725386613,-0.0211477017578759  
"Resf1",4258.91713405048,0.267166444928166,0.229913000675454,1.1620327  
8693796,0.245222147181713,0.384373508700805,0.255448663642061  
"Syde1",1891.15509564985,-0.329195584870427,0.121409472537268,-2.71144  
893384967,0.00669898588428907,0.0249122523800047,-1.21552030708555  
"Trib3",122.062721766894,-1.09637542703248,0.216006617321481,-5.075656  
66565092,3.86160027685884e-07,1.30357945468295e-05,-12.3318241995995  
"Mdfl",368.849861767351,-0.826220943235319,0.231295387115807,-3.572146  
22192892,0.00035406761550239,0.0026285112682089,-4.90885759790603  
"Mansc1",345.299267324135,-0.0133713741323314,0.16666780592385,-0.0802  
276963941121,0.936056162617768,0.960085379206798,-0.000544657008898402  
"Sbspon",85.4734490117124,-0.780301823968083,0.73024228675974,-1.06855  
19561329,0.285271607009304,0.429494949749053,-0.659468416040849  
"Abtb2",519.600436755869,0.57897816272999,0.277856970035406,2.08372733  
156996,0.0371849766315921,0.0926763601078359,1.37718169039271  
"Folr2",228.018241219412,0.914397432550729,0.329729001280379,2.7731786  
6793642,0.00555116334240517,0.0214584819290674,3.51278144034012  
"Bmp8a",34.8214186524649,0.745989384414081,0.417740389599113,1.7857727  
0234744,0.0741360683012282,0.15693247852973,1.38152731141945  
"Mier3",1445.89849752963,-0.0955450329360586,0.124206655914023,-0.7692  
42455108006,0.441749391411297,0.583433559150407,-0.051482023689621  
"Snx33",1216.96120703694,-0.526739485397088,0.074684525586529,-7.05285  
976258644,1.75277483525711e-12,1.13918679126144e-09,-10.8471205021392  
"Ablim3",725.190971502769,-2.03009433867811,0.528322914333343,-3.84252  
562893236,0.000121774693385787,0.00115935691974418,-13.7232140275219  
"Inppl1",5970.65713338053,-0.173644105604071,0.157117406905915,-1.1051

8693646753,0.269078596214399,0.411425224983403,-0.154218190253057  
"Pram1",69.8810925018861,-0.82210002095737,0.290893425346828,-2.826121  
00970379,0.00471154612528486,0.0189687644746653,-3.25959503718056  
"Ccdc88a",1967.73159049353,0.0106657050411268,0.287028690502212,0.0371  
590206625864,0.970358212803502,0.981941181421263,0.000194370412968584  
"Tpcn1",5592.98225371731,0.69985880649774,0.156439639084389,4.47366671  
64018,7.68895566722276e-06,0.000138429600738236,6.21834953638072  
"D430042009Rik",1734.27627784362,0.226758665029312,0.208787348977872,1  
.08607473651742,0.277445928449953,0.420954256731232,0.196198650322536  
"Heyl",851.670827749857,-1.46869697794577,0.250635449576376,-5.8598932  
4506234,4.63164826410308e-09,4.56100393199403e-07,-21.4437879075529  
"Gpbp1",2986.94301835396,-0.356708656101866,0.148476644767248,-2.40245  
633689421,0.0162853785876901,0.0491688311710717,-1.07458317459657  
"Gab3",138.964994277602,-0.371052275001425,0.37176149438014,-0.9980922  
73165898,0.318234616584343,0.463296610448278,-0.285483094547174  
"Slc8b1",1976.19410811409,-0.506788145379652,0.149324054791506,-3.3938  
8148873439,0.000689095063349744,0.00441102283164586,-2.74864085664147  
"Bet1",1618.29147953878,-0.0773009188366591,0.178956719597363,-0.43195  
3150519185,0.665775463734094,0.773579226723292,-0.019845247518096  
"Kap",667869.924159994,2.52117809327019,0.943604535389316,2.6718588123  
6782,0.00754323789983755,0.0272720290322701,9.08101543930127  
"Ilvbl",2061.46269147712,0.718247024170663,0.132302099799866,5.4288407  
0061745,5.67212822812044e-08,3.00530315738838e-06,9.13260580047824  
"Gng11",1530.34330190155,-0.693139248158442,0.182832536711886,-3.79111  
541426958,0.000149972238032229,0.0013632441478566,-4.57325513950608  
"Trpa1",0.715634209851955,1.0042717228535,2.19019219458431,0.458531322  
199378,0.646570764708842,NA,NA  
"Chrm1",14.5465324548412,0.0414595167069589,0.557004173199348,0.074433  
045032359,0.940665815588138,0.963293176068147,0.00155048116306992  
"Mctp2",144.056033304579,-1.24863477366238,0.317222703092303,-3.936145  
68405926,8.28007195517871e-05,0.000854450542227716,-8.82166952536855  
"Gtf3c1",3330.90531267233,0.22902349967068,0.151227794730467,1.5144272  
9214473,0.129917501580878,0.239993505052009,0.326849380188669  
"Cntrob",744.919984272811,-0.0736183811314435,0.193990224865461,-0.379  
495313140137,0.704320084033609,0.80365361648451,-0.016092015768719  
"Troap",66.5424809504645,-0.976893621534203,0.659857306590613,-1.48046  
192984006,0.138750013303246,0.25254814651244,-1.34435544861111  
"Alas1",5708.99101940153,0.284668781135138,0.393600289050357,0.7232433  
23377534,0.469530406459148,0.607653250042511,0.141808001592374  
"Pdxk",3978.77459078619,0.0891414716961788,0.24251337996143,0.36757341  
6816655,0.713191339500764,0.809795291031091,0.0188065141636734  
"Lama1",776.4537345881,0.673592449361799,0.472569699877838,1.425382223  
05816,0.154046743899074,0.273626984835942,0.872968720980228  
"Srxn1",2319.33504461051,0.0656697414690127,0.206958588395713,0.317308  
60737922,0.751009446837079,0.83805364594581,0.0116020809983018  
"Cdv3",4883.759305933,-0.0211503552847928,0.114104557945961,-0.1853594  
25298414,0.852947130824998,0.906427978408292,-0.0020778892044893  
"Slc10a3",351.597563131526,-0.346238447424348,0.176696237315937,-1.959  
51228324838,0.0500528228042968,0.116487221179062,-0.744403556390743  
"Alox12b",3.49887759399103,-0.354755445115909,1.02949847767963,-0.3445

90548512015,0.730402212274798,0.823201291036648,-0.0690192775232475  
"Cyp2c38",2.80733728310569,1.16654475559894,1.03126954207456,1.1311734  
7890664,0.257982082188135,0.398936288927702,1.07200044639204  
"Arap1",5204.49429643893,-0.821097227134783,0.209878031188139,-3.91225  
905106158,9.14367507335689e-05,0.000920559224143257,-5.73990415895931  
"Fanca",409.730753010211,0.865876188584088,0.362982276068921,2.3854503  
2545799,0.0170582259393476,0.0508875901721847,2.57869721602096  
"Igdcc4",237.398051181809,-3.13581710153454,0.520127615587359,-6.02893  
791361834,1.65040670288606e-09,2.28224325481365e-07,-47.9558527752074  
"Loxhd1",0.336219051263774,-1.65347479902343,3.83581333134509,-0.43106  
2373528906,0.666423018422428,NA,NA  
"Ank2",297.133215253891,0.201296771973165,0.282858808048084,0.71165106  
4933239,0.476680877196029,0.614215222944344,0.0981140367373569  
"Ppp1r9a",1761.23039885626,0.251240177443231,0.211851013767584,1.18592  
860602905,0.235650495137262,0.373547375204309,0.247398825979754  
"Pwp2",914.968375938089,-0.133465969452974,0.100441154532523,-1.328797  
6434974,0.183914739859822,0.312121994759058,-0.155402590846432  
"Trpc1",1569.23042274127,1.24066567181143,0.289322542188647,4.28817492  
901219,1.80147199158595e-05,0.000265696678456451,10.214593035253  
"2410131K14Rik",797.450303507716,-0.22103276038098,0.231660850179062,-  
0.954122201529233,0.340021789175535,0.484701333919037,-0.1600768726837  
29  
"Prr5l",287.980347514547,-0.889749563518225,0.212615803291796,-4.18477  
624778025,2.85447126353964e-05,0.000375549802270553,-7.01756110259096  
"Abcc10",1661.34936992058,0.7822793145192,0.240072467434378,3.25851324  
343568,0.00111997648757888,0.00641707362762651,3.94956639480981  
"Alpk2",48.3056833049633,0.546244274045785,0.405935477515324,1.3456430  
9921683,0.178417645054402,0.305397879314435,0.647922090454724  
"Zswim6",1180.82138600874,0.353999962623978,0.258615647199748,1.368826  
54416714,0.171053501418392,0.295857462135706,0.431128585047734  
"Abcc4",1644.60977661178,-0.573023245056204,0.232002545648534,-2.46990  
067912569,0.0135150570193395,0.0427231812196955,-1.8067500964391  
"Rnft2",249.36086255129,-0.962132084193973,0.350688399347781,-2.743552  
64098661,0.00607783025638946,0.0230824959756684,-3.6259686152663  
"Rspo4",0.969682059987668,-3.3093454009672,2.96832529893939,-1.1148863  
6442564,0.264899120609913,NA,NA  
"Ugt8a",2245.98954678823,1.76619257137542,0.612825131401365,2.88204983  
913865,0.00395097234823614,0.0166528445408362,7.23286631032146  
"Pkd1",4731.67297766397,-0.582623672922545,0.164638923394775,-3.538796  
66429496,0.000401955341569891,0.00290534388557293,-3.40322344826613  
"P2ry2",299.050055059534,-0.688854345988723,0.226337993972007,-3.04347  
641286385,0.00233861773524119,0.0112699872965232,-3.089933374436  
"Rag2",0.345239651971042,-0.465485296666782,4.78471990594864,-0.097285  
7985037043,0.922499433653354,NA,NA  
"Fbxw8",3702.24855589715,0.0778359934283532,0.156259766524733,0.498119  
22262173,0.618400012554892,0.736789700262467,0.0237752200437913  
"Psmf1",1271.09463064752,0.297967997626844,0.13127428041627,2.26981246  
198408,0.0232189641323836,0.0646009364516576,0.816291187553369  
"Smap2",2015.63136312375,-0.359333817659051,0.182593936348496,-1.96793  
948827102,0.0490750005918918,0.114731937834617,-0.778014075635196

"Cyb5r4",2464.6411947255,0.424413439712789,0.170644328354834,2.4871230  
3423453,0.012878085318182,0.0410624542165024,1.35500827831586  
"Arhgef17",3535.76951851628,-0.543933194468603,0.255717343856009,-2.12  
708761269976,0.0334128043138081,0.0853620097629234,-1.33854024680884  
"Ccdc85a",144.272734344711,-1.79394475361438,0.478237422967121,-3.7511  
5929339916,0.000176018821348441,0.00153146585392767,-11.6275066093278  
"Acsl3",1200.21307043728,-0.51357788061317,0.260000348561231,-1.975296  
89269713,0.0482344656665715,0.113283017533945,-1.11850381047467  
"Rims3",55.5221000655275,-0.705027074061864,0.294675583575546,-2.39255  
341588597,0.016731592417503,0.0501529639200561,-2.1099187779223  
"Rangrf",457.714587372916,0.776537631784374,0.18430680686278,4.2132878  
5953369,2.51679970277937e-05,0.000343886199052503,6.19304274397995  
"1700031F05Rik",1.75029690476247,-0.0409722814930489,1.28749106072497,  
-0.0318233522102887,0.974612923695024,0.984305541603935,-0.00064813725  
8232409  
"Nfyc",3263.28472568178,0.776929495960492,0.137573953792268,5.64735892  
619344,1.62931436768914e-08,1.18538699780608e-06,10.6015457973892  
"Fbxo21",2347.99480469679,-0.672795438579632,0.411149866528234,-1.6363  
7518421383,0.101761089573942,0.199933265267303,-1.08304701774378  
"Styk1",324.069395228214,-1.31197576425889,0.368675716445668,-3.558617  
25016065,0.000372812356344069,0.00273995300565272,-7.7404136506785  
"Tex43",0.291913614356984,1.1431185991579,4.75616617243151,0.240344545  
946237,0.810063164186048,NA,NA  
"Slc16a1",2329.49278649085,-1.29116582294777,0.491285188650732,-2.6281  
3911914145,0.0085853396457381,0.0300084645805516,-4.52718345868866  
"Atg12",2122.98799737482,-0.185953317732985,0.302409053825562,-0.61490  
6582262079,0.538616415624511,0.669812533151446,-0.0745221694405636  
"Sgpp2",1227.55176650403,0.672686648980631,0.456214179001149,1.4744974  
6181374,0.140347700600041,0.25481883474249,0.91969882670124  
"Cspg4",1895.37105636124,-0.921337831055713,0.274928500050695,-3.35119  
069461996,0.000804648717706852,0.00498321423858778,-4.88463850574794  
"Lrig2",1269.29783531183,-0.313878963810862,0.11749932643232,-2.671325  
64365513,0.00755523115128089,0.0272998859302633,-1.13023820921022  
"Adgre4",62.501703794826,-1.18224040286985,0.359733140008562,-3.286437  
28192992,0.00101463365759534,0.00593915552560609,-6.06038694831296  
"Odf4",11.5830797469335,2.98471010687893,0.811410745593779,3.678420729  
68205,0.00023468260595261,0.00191778769944006,18.6740865061388  
"Itgbl1",146.177769956381,-2.19159373758362,0.469647703374734,-4.66646  
3227299,3.06428454936789e-06,6.75112092017798e-05,-21.0463500441723  
"Hspa13",1300.99610154455,-0.459021785312287,0.196200606217081,-2.3395  
5334880268,0.0193068139546275,0.0559472887398753,-1.32351830912506  
"Camkv",1.68568254715628,-2.25625994168664,1.50627644778698,-1.4979056  
1022284,0.134157775877202,0.246054775096763,-3.16373018304043  
"Nup93",934.178611174908,-0.0295441819567012,0.125561998603084,-0.2352  
95569403079,0.813979333708263,0.881720502702429,-0.0037190264568308  
"Rbm11",129.671912299402,0.277609506889045,0.443557321651196,0.6258706  
44758177,0.531399790357985,0.6637136065851,0.113793396647113  
"Ucp3",528.106508013464,-3.51719102574486,1.2998353405271,-2.705874287  
36826,0.00681248297171983,0.0252624178361722,-12.9377671831928  
"Rasgrp2",1902.81762739469,-0.619435700625897,0.200718902321067,-3.086

08553286654,0.00202810472750351,0.0100968921544931,-2.84663386482279  
"Lipi",0.353797169457995,-1.82943708587333,3.19040436359351,-0.5734185  
63097983,0.566361324434837,NA,NA  
"Ap4b1",1138.27309437703,0.18545597441355,0.162158126345504,1.14367363  
876915,0.252759009758431,0.393037337289249,0.173188185182789  
"Pebp1",17446.2066590993,0.799380326971142,0.274567894026983,2.9114122  
385066,0.00359798967359786,0.0155241430971036,3.32970591764214  
"Ift57",992.34377109163,0.623512601985244,0.233693708593797,2.66807611  
440249,0.00762869734646639,0.0274588039249403,2.24157047521021  
"Fkbp1a",7925.05942964014,-0.520118504090733,0.207642215195364,-2.5048  
7842080364,0.0122493491349521,0.0395688882427593,-1.679833036468  
"Inha",328.79585880022,-0.00816421009981045,0.240868289321525,-0.03389  
49146141541,0.972960948409808,0.983401201186793,-0.000136653385824761  
"Fam207a",1807.64338816902,0.035774759901948,0.160822929292805,0.22244  
813012213,0.823965047814298,0.887213966328871,0.00428113335738968  
"Guca2b",10790.1827431226,2.13100620706772,0.771081553131272,2.7636586  
537623,0.00571572980039384,0.0219596649552865,8.13734931844521  
"5730522E02Rik",5.41555993088899,0.674872375464959,0.771705834741923,0  
.87452024473892,0.381835000126595,0.526743278741858,0.432621528028473  
"Slc16a8",13.300101759475,1.15683956121503,0.804571754293898,1.4378326  
7936156,0.150481534634692,0.268738684952118,1.52010546489155  
"Chpf",1478.904310425,-0.889507763552143,0.24428784527632,-3.641228087  
07899,0.000271340608630006,0.00213675249881577,-5.46911013244964  
"Foxj3",1969.71792370711,-0.152027739603381,0.138068127297136,-1.10110  
66969584,0.270850222691284,0.413291410395574,-0.134332066558416  
"Nlrp4f",7.75252535013933,3.4910065122059,1.32717579472738,2.630402487  
80531,0.00852838319394384,0.029874801696546,12.2560158763399  
"Mycbp2",7110.78128134074,-0.263211019019313,0.106756323673971,-2.4655  
3093962984,0.0136810359261957,0.0431708753016611,-0.827164104092721  
"Sox10",48.773098875789,-1.3256247094838,0.385578331536189,-3.43801661  
312852,0.000585991745749985,0.00389290189391251,-7.35536180828492  
"Asic4",6.91200097026395,0.0249089054006573,0.725782063544618,0.034320  
0895307411,0.972621905176315,0.983313383134283,0.000419152285619326  
"Ogfod1",886.308277185645,-0.478271046183663,0.19644034043834,-2.43468  
854267123,0.0149046126660949,0.0459898936166354,-1.47275610749864  
"Trim33",1533.98760331967,-0.0852334225177013,0.11413870386313,-0.7467  
53026211945,0.455212655075461,0.595447225859475,-0.044188629989795  
"Nfatc1",808.836784986167,-0.711328322711439,0.191947233984421,-3.7058  
5346788157,0.00021068008373316,0.00176075451034255,-4.5112533722665  
"Polr2f",2869.75630787661,0.688905557933712,0.139547804206967,4.936699  
37587824,7.94558047527842e-07,2.30540071587766e-05,7.35590686824613  
"Gmppa",1974.97729684999,-0.0484031173443937,0.123788964071005,-0.3910  
13186899517,0.695787488566634,0.797323799710386,-0.0109630354826287  
"Cdo1",12577.4779876314,-1.5229181790485,0.639188499124573,-2.38258069  
588905,0.01719176359557,0.0512467522682194,-4.52474682131153  
"Klra9",19.5832179074585,-2.78878972665188,0.610488687015896,-4.568126  
79082333,4.92102337170116e-06,9.83095427268742e-05,-25.7332489241054  
"Klrc3",1.45228626529532,-3.5678574545682,1.71296251848797,-2.08285786  
528332,0.0372641812243889,0.0928177063762308,-8.48121766263942  
"1700088E04Rik",295.316179637771,1.04649850667985,0.288341921513343,3.

62936648679933,0.000284117634052742,0.00221058484786926,6.398813195020  
37

"Cip2a",227.167574150193,-0.156375346444834,0.297282465572631,-0.52601  
6043844433,0.59887705973674,0.720885597650757,-0.0511777143079849

"Afap1l1",1876.01327546777,0.794580211201806,0.160031499264662,4.96514  
88291547,6.86484049636179e-07,2.03111775414358e-05,8.58491412791829

"Calhm2",321.91232330083,-1.1696607197275,0.27749310830308,-4.21509826  
633242,2.49669454504296e-05,0.000341819314658468,-9.33532921455606

"Gm7879",0.124297893645588,-0.542933062309523,4.78471990596623,-0.1134  
72276952413,0.909656140889958,NA,NA

"Micall1",3839.53565451756,-0.193914911356495,0.178484248306907,-1.086  
45392070147,0.277278216887546,0.420794728586034,-0.167854714490717

"Dhrs7c",0.101658679199014,-0.544048378937456,4.78471990596623,-0.1137  
05376621746,0.90947135024012,NA,NA

"Eif3l",4430.77847946,-0.195040954424543,0.21728366041429,-0.897632864  
121776,0.369381312219686,0.514332416315035,-0.129679902154837

"1700028P14Rik",0.645412776555757,-0.733518792818315,2.11865479196721,  
-0.346219117715364,0.729178048300999,NA,NA

"Npat",655.286123773094,-0.253115495328702,0.138106581610759,-1.832754  
76357879,0.066839049168703,0.144834836295139,-0.489059950789897

"Ankrd54",1475.16956968441,0.338020665917247,0.127545522612439,2.65019  
625145416,0.00804450271088395,0.0286016983692223,1.20142319527657

"Pygb",3437.45611264127,-1.27125812354183,0.346512769519897,-3.6687194  
1055214,0.000243768437832974,0.0019681147001521,-7.92080154748748

"Lmo7",3632.88692852059,0.433102927706619,0.177296337529748,2.44281937  
089619,0.0145730290826674,0.0452984237485801,1.34022966563391

"Resp18",0.22558165094264,0.00101168431383369,4.77171825507405,0.00021  
2016774619479,0.999830835090167,NA,NA

"Cntnap3",17.1156586523661,-1.04012313242601,0.528899413067993,-1.9665  
8023572489,0.0492316238693376,0.115017576314095,-2.24944343261856

"Pfkml",2086.68260682723,0.231747447581272,0.263742546728088,0.87868813  
9082078,0.379570391437736,0.524400445848011,0.149592902533094

"Gas7",1430.59731987326,-1.32951768847334,0.253749198745307,-5.2394951  
1977691,1.6101650428219e-07,6.55427933297315e-06,-15.8683152992054

"Entpd6",1363.60521840728,-0.559048198682206,0.317968978953312,-1.7581  
8471513315,0.0787160850947951,0.164255803422337,-1.00982569450362

"Senp1",1182.06684230299,-0.431489898952124,0.150586462064612,-2.86539  
635128013,0.00416487590846625,0.0172855967488205,-1.75093495697713

"Vsx1",0.113734556814598,0,4.78471990596623,0,1,NA,NA

"Clec1a",308.819748911541,-0.0568970717710036,0.213980216193807,-0.265  
898748879993,0.790317188671428,0.86497920542888,-0.00825290958113572

"Tbc1d4",1787.06792002569,-0.941877427039245,0.166008774386549,-5.6736  
6050692055,1.39778010905372e-08,1.02844968174828e-06,-12.9860955163431

"Triobp",2373.96560188277,-0.0391454121448772,0.123869073416778,-0.316  
022482974148,0.75198544303391,0.8386553891366,-0.00688784653060014

"Apmal",4718.69835089908,-0.313364500369875,0.467083325406777,-0.67089  
6354728505,0.502286558730565,0.637229704088006,-0.141209904755449

"Nol12",1103.5602027772,0.0913276581652282,0.182993144985776,0.4990769  
36309974,0.617725184810055,0.736255617912247,0.0279625118314027

"Cdc14b",1368.08710401128,0.40264043338729,0.196747280310025,2.0464853



8344636,0.0407086390915062,0.0992536385845264,0.930130283358216  
"Lss",1431.47134295014,-1.29464430587131,0.526279442143488,-2.45999406  
816717,0.0138939312153196,0.043687126404822,-4.05314527242186  
"Slc7a6os",1774.62240099618,0.124172693157788,0.129012631100161,0.9624  
84774544162,0.335806147658413,0.480377715850604,0.0910412551013512  
"Rnf125",79.2942124633007,-2.51268247159717,0.596978085760308,-4.20900  
286213527,2.56500140008801e-05,0.000347549668512272,-20.012518281484  
"3830406C13Rik",1459.3195415371,0.0728798909748646,0.145669829384946,0  
.500308754960322,0.616857690403701,0.735671371184253,0.022372068875619  
5  
"Slc35d2",660.201734095644,0.559202419751772,0.133319819664924,4.19444  
326550417,2.73542603828546e-05,0.000363072409084342,4.4293910709531  
"Hsd17b3",0.195819844963184,-0.00681195359704331,4.78471990596399,-0.0  
0142368910425717,0.998864060828067,NA,NA  
"Atg9a",2423.42884859491,0.379558974771941,0.128929846670479,2.9439186  
0824921,0.00324085216872831,0.014312601491702,1.61184080018877  
"Ybey",296.219780652344,0.290668885318857,0.124397539226364,2.33661282  
310361,0.0194593250960266,0.0562350556873169,0.83660753118557  
"Gga1",3726.43637052721,0.0602867339103998,0.116783672790246,0.5162257  
05785777,0.605696778555168,0.726519153348486,0.0192610346882454  
"Slc22a15",625.204687172449,-0.753875598039435,0.176919303836952,-4.26  
112686230217,2.03398727433383e-05,0.000291607969668831,-6.136622927015  
04  
"Phldb2",7766.85802684325,0.890824147414816,0.255936918618997,3.480639  
49594138,0.000500218268419192,0.00346351413268373,5.04693887218167  
"Podxl2",465.912150640642,-0.398742588460267,0.359225985989226,-1.1100  
0485491667,0.26699693442829,0.409012117181238,-0.356480059691684  
"Abhd10",680.740422091073,0.219538153536549,0.152664652895359,1.438041  
80845338,0.15042219196426,0.268657314181473,0.288543086613351  
"Cnppd1",4401.62443246838,0.467789151437069,0.137488063493944,3.402398  
28498039,0.000667972143475782,0.00430691827165701,2.54829667520363  
"Atp1a1",85091.7373473408,1.41901798273428,0.387097132686955,3.6657930  
6047672,0.00024657326005555,0.00198664686965418,8.82814658227777  
"Dis3",752.580800963488,0.0600032894125388,0.232496267898503,0.2580828  
0689793,0.796343000325003,0.869670427934183,0.00837891679090503  
"Card10",3744.05044304881,0.0437741963777137,0.239404722470071,0.18284  
600205907,0.854918852588759,0.907661736334093,0.00424099765535805  
"Mgll",10225.074030125,-1.5696248109018,0.675043836952378,-2.325219082  
04983,0.0200602485070886,0.0575875626312151,-4.48041343996636  
"Tmprss7",11.3140837578225,0.630064353496879,0.58051918284933,1.085346  
3108736,0.27776830186045,0.421341710726238,0.544571620797973  
"Kbtbd12",9.05362380927426,-2.29043979962633,1.06445422239969,-2.15175  
040074789,0.0314170182129997,0.0814369876518304,-5.74425287310909  
"Tmed7",5682.19763080373,-0.435967786008094,0.225486375821979,-1.93345  
511195004,0.0531801576896598,0.121859997018802,-0.917660945294413  
"Mzt1",1951.81658752305,0.106822848122628,0.0941163984517813,1.1350078  
188272,0.256372042367196,0.397198417328216,0.0986316007058157  
"BC016579",22.1408626889094,-0.849502980174909,0.474007390914869,-1.79  
217243540297,0.0731053486428234,0.155323971650623,-1.58198030183742  
"Tie1",3450.9207859395,-0.678055353988996,0.192625217595461,-3.5200757

3283059,0.00043142359448098,0.00307340052801979,-3.92253033311668  
"Lpcat2",666.300531061858,-1.1777672172362,0.351501300238812,-3.350676  
70144041,0.000806143589478451,0.00498759665537849,-6.24310978119739  
"Myh2",0.639290963518614,-2.1265557365812,2.87123215351831,-0.74064221  
3126302,0.458910405776468,NA,NA  
"Tpsg1",0.132294999522605,-0.470076037063128,4.78471990596623,-0.09824  
52570477477,0.92173754633477,NA,NA  
"Mamdc2",107.599326217883,-1.37944791744613,0.324945849332433,-4.24516  
244869741,2.1843511123318e-05,0.000307512476449426,-11.1555882700594  
"S100b",84.3709660338109,-1.43205231429783,0.514614315231465,-2.782768  
12733768,0.00538973100676595,0.0210430466900125,-5.52941905400152  
"Ttc28",2274.96764737035,-0.661943008025694,0.209029068797033,-3.16675  
097791514,0.00154152261442358,0.00822245592804336,-3.17791314498129  
"AA467197",150.647434418898,-1.42534633289657,0.39744464917206,-3.5862  
7631763514,0.000335433529359876,0.00252423116767999,-8.5261634203169  
"Slitrk5",4.27152993270479,-1.55843266712988,1.34193191612166,-1.16133  
512319606,0.245505641218948,0.384652134925474,-1.48895134736318  
"Eefsec",1163.85859403813,0.655849195922747,0.128663873600532,5.097384  
196274,3.44378952146271e-07,1.19478662080925e-05,7.43402299536281  
"Gm9758",4.65928813721771,3.75442887587005,1.09888713178853,3.41657370  
194099,0.000634144958315167,0.00414084340161726,20.600009822077  
"Rac2",1665.46517495567,-1.38579280153528,0.502021888694529,-2.7604230  
6668925,0.00577265524077365,0.0221391093400088,-5.28043816832855  
"Ttf2",526.451338028716,0.0354669387277995,0.243676590925592,0.1455492  
24047662,0.884277254320871,0.927951660474155,0.00265206295563602  
"Wnt6",48.5694594610836,-1.63488430790286,0.410657173229773,-3.9811414  
8364847,6.8585108305128e-05,0.000740460931192351,-11.7846346799615  
"Scaf11",4062.70758682001,0.266632950300088,0.0810192195168287,3.29098  
394047977,0.00099837612708794,0.00586688900722141,1.37007495541557  
"Trim45",184.906552023145,-0.399786896916391,0.22582672384325,-1.77032  
589461773,0.0766728667796648,0.160835670410963,-0.73055942773686  
"Arid2",3057.84185557273,0.390060038552902,0.205199629118332,1.9008808  
1654361,0.0573176253263783,0.129110334867574,0.79848719734081  
"Hsf4",178.599549107822,-0.248027332121879,0.263176172920924,-0.942438  
403025198,0.345968233493259,0.490702598141526,-0.176574884404718  
"Szt2",2137.49823347138,0.159948412108156,0.181837414482345,0.87962322  
0355926,0.379063455452426,0.523922822315971,0.103392395611297  
"Gm5134",7.67298865253724,-0.298624033915902,0.687994062157171,-0.4340  
50307032566,0.664251909928615,0.77244490605285,-0.0771031105323133  
"Shf",424.648259775714,0.657498601007528,0.14351394357934,4.5814266168  
7807,4.61814658165897e-06,9.34072842833886e-05,6.10062787521241  
"Ttll4",2288.71477649154,0.680624012633054,0.209164831774921,3.2540078  
8869452,0.00113789119901286,0.00649001998870535,3.42863643166796  
"DuoX1",58.1824143619674,-2.25426655111355,0.898182310792975,-2.509809  
56096021,0.0120796287024207,0.0391470797400074,-7.30479172240284  
"Slc35a4",2916.71305384151,-0.338239470181441,0.206663930863763,-1.636  
66426341428,0.101700639914064,0.199854774949045,-0.544621120225998  
"Stk36",387.431338112182,0.103520875611708,0.245883331092839,0.4210162  
40310415,0.673743222931732,0.779576604398725,0.0257771453978784  
"Ptprm",856.647608197875,-0.989263328831712,0.262342226303996,-3.77088

866999771,0.000162667235875399,0.0014489199475096,-6.4667519223296  
"Rpgr1l",500.639678306894,0.261965817201899,0.294354829608754,0.8899  
66091434936,0.373484093715975,0.518669750235761,0.17197739385523  
"Wdr3",1010.74331906071,-0.134988317730018,0.190045678284059,-0.710294  
066925596,0.477521798268783,0.614974902420392,-0.0656277862320806  
"Kctd17",2211.37480147909,-0.529676599619272,0.285442149808318,-1.8556  
3554637941,0.0635055234588438,0.139314884833544,-1.04400240302886  
"Noc4l",726.587277191961,-0.166908868502729,0.13960854969721,-1.195549  
04670759,0.231872585484877,0.368975081350211,-0.166412509474707  
"Ptprf",6691.32964708481,-0.166002133225656,0.208513208517484,-0.79612  
2866296678,0.425960624649155,0.568862681810383,-0.093644493662199  
"Lpp",5348.88706367471,-0.190892475936435,0.103502617263999,-1.8443251  
0966881,0.0651357742368005,0.142012448403124,-0.372591677210297  
"Mif",5284.33259897489,1.07993258683954,0.24172246058595,4.46765511248  
61,7.90816669807769e-06,0.000141461866311118,9.57196128787029  
"Dpyd",1773.41100158028,0.496627010370453,0.35565827801714,1.396360048  
58158,0.162606099463356,0.284732261098924,0.623865817773491  
"Fbxl8",332.013533893463,-0.081016307734513,0.169220432904533,-0.47876  
1969485204,0.632107974665067,0.747477804124188,-0.0235798504556554  
"Galnt9",29.7222365143887,-0.822365507381484,0.579903848194804,-1.4181  
0665671808,0.156159628094377,0.276573751347458,-1.05696809868342  
"Gstt2",7041.04578116427,1.76686405966297,0.300367324586946,5.88234443  
307938,4.04495470595479e-09,4.12924224380663e-07,25.9729047459031  
"Fem1c",1727.25516584978,-0.256600827307991,0.18761053545459,-1.367731  
43728967,0.17139615577595,0.296323570463898,-0.312104427455142  
"Ctdp1",857.67178151338,-0.123766060319866,0.169236858272012,-0.731318  
588536658,0.464584579024524,0.603455474107,-0.0625121355951074  
"Kdm4a",3147.25082386419,-0.033284552294657,0.164252625746717,-0.20264  
243657196,0.839414518486999,0.897124821651609,-0.00361338005156647  
"Tnxb",2246.00702167402,-0.59868622002363,0.240214941821755,-2.4922938  
4102122,0.0126920987617942,0.0405755929918778,-1.9185430063159  
"Dnm2",4773.48962990711,-0.0576975094027204,0.136273372733183,-0.42339  
5328415988,0.672006852706769,0.778306481382631,-0.0144610093514997  
"Plppr5",8.71615871796973,-1.30626976935129,0.585495776188444,-2.23104  
900577602,0.0256778830527911,0.0699451472147696,-3.47473500399858  
"Chst2",659.439870527364,-0.455154435174935,0.198599944776094,-2.29181  
551731087,0.0219162908758081,0.061859270338232,-1.26664623137602  
"Map2k4",1961.76950408874,0.0542551639698108,0.126971628360941,0.42730  
1474118142,0.669159759263854,0.776161629156848,0.0137479599019273  
"Rtp4",907.159809734066,-1.24467624914423,0.221136341576429,-5.6285468  
0633328,1.81734189685302e-08,1.27557867205757e-06,-16.8928837418123  
"Pus7l",232.040610471817,-0.240904594865295,0.189888777104011,-1.26866  
157410314,0.204561793014366,0.337126687532254,-0.261934720874172  
"Prrg3",197.484935346536,-1.69658860191852,0.37236700428665,-4.5562270  
0826756,5.20806498550383e-06,0.000102558077974414,-15.5833042505495  
"Usp37",992.138103873232,-0.0701423870241037,0.103122983080093,-0.6801  
81904451176,0.49638928871279,0.632092368816744,-0.0321756977016567  
"Ipo13",2109.2354905115,0.348088251916427,0.224459076502306,1.55078715  
167418,0.120952700660808,0.227946622606267,0.514698531654674  
"Trim69",17.1884946917227,-1.07007864990427,0.493762024124865,-2.16719

512157878,0.0302199792160684,0.0790911617120673,-2.71495448323241  
"Fntb",552.243389012328,-0.48069537072294,0.147816156530506,-3.2519812  
583798,0.00114603578319427,0.00652992568694386,-2.41855132392894  
"Palmd",861.157274062913,-2.432525624383,0.578034122326548,-4.20827340  
536964,2.57329398584988e-05,0.000348431153722924,-19.3679390489729  
"Atp6v0b",10830.9988013151,0.595481496644414,0.180316691136449,3.30242  
027452578,0.000958543323069717,0.00568309307721275,3.07879394764475  
"Trappc8",2269.01639314073,-0.0549187340999556,0.141670358633772,-0.38  
7651549904836,0.698273914863598,0.798811593053886,-0.0123364042727423  
"Rtp1",13.467212016635,-0.617812445660679,0.671967759728353,-0.9194078  
6848231,0.357882275217344,0.502990600604612,-0.424550701456948  
"Frrs1",3922.86152136825,1.00153515954793,0.265516459668391,3.77202664  
120623,0.00016192696177011,0.0014443055354957,6.55016680911898  
"Arhgap44",486.419755896418,0.170124617993678,0.257182572769984,0.6614  
93569184535,0.508295837370023,0.642762321618828,0.0751917233801834  
"Clasp2",1881.11912699563,-0.247097159796129,0.095504487602215,-2.5872  
832366298,0.00967360390033797,0.0329575273193762,-0.843227853821976  
"Spg11",1101.19096180811,-0.255504731631638,0.142862857566731,-1.78846  
157765179,0.0737015692527005,0.156284197638842,-0.474237004960777  
"Agl",2128.72510417758,-0.19694798301201,0.345291978821658,-0.57038099  
6639753,0.56841931570854,0.695299344328008,-0.0715734208920212  
"Nudt15",143.084645798311,-1.11145591808446,0.382089589514516,-2.90888  
825182775,0.0036271648536917,0.015615860669339,-4.6230655154674  
"Syce1l",4.98102794362967,0.0206475664805202,0.817436312562514,0.02525  
89298557019,0.979848432697305,0.98698583151997,0.000270474753426642  
"Ctdspl2",676.819018986405,-0.293768327717341,0.152913093739642,-1.921  
1456686471,0.054713345499455,0.124422767733657,-0.612233786670388  
"Gucd1",4150.215126636,0.404093554447295,0.243231007591173,1.661357071  
40803,0.0966417541223689,0.192218802598995,0.666399150008444  
"Cacul1",2846.84216625639,0.216373614726597,0.105021547241009,2.060278  
29917656,0.0393719432793016,0.0967819150352776,0.505296248796889  
"Snap91",56.5163757839664,-0.655378102565372,0.414672592087414,-1.5804  
7123217446,0.113998989952023,0.217819506296288,-0.998854237073698  
"Antxr1",920.128890427078,-1.56969670848187,0.288214746945963,-5.44627  
478335162,5.14356569760477e-08,2.78581233255272e-06,-20.0779451488293  
"Eri3",2551.65829822655,0.0223397212321434,0.152146608290902,0.1468302  
28311302,0.883266024521086,0.927455487431317,0.0016824150763371  
"Upb1",3711.57794621947,2.21193004155676,0.634483688346783,3.486188978  
8218,0.000489954751221922,0.00340575320475046,12.5688260941362  
"Mcee",2102.25123267466,1.05370876026388,0.247204342289426,4.262501016  
38668,2.02151579023147e-05,0.000290844253564796,8.58005818363251  
"Terf2ip",1420.98769274491,0.0959051483811403,0.147637769578406,0.6495  
97651434365,0.515952150523698,0.649579326590757,0.0413763884213289  
"Gtpbp6",1590.37950838289,-0.144119598672053,0.172626596778441,-0.8348  
63232906254,0.403794718181673,0.547627378078758,-0.0867830849660853  
"Armcx2",934.088668711787,-0.707157585804864,0.238274214294146,-2.9678  
3094175641,0.00299909234197242,0.0135416393905845,-3.04218199237101  
"Trmt13",538.3662703168,0.0797891135257116,0.224717612542483,0.3550639  
07198762,0.722541715113899,0.816797214824374,0.0161464778405163  
"Specc1l",2322.16951841716,-0.494288707016228,0.102911269210081,-4.803

05714631889,1.56261264309902e-06,3.90112948977525e-05,-5.0178505697328  
1  
"Lpar6",1801.30647162905,-0.535465177884463,0.191154760929167,-2.80121  
287736527,0.0050910922882997,0.0201596501700381,-2.09049470894581  
"Tagap",386.305841999035,-1.05448447080016,0.359615558275723,-2.932254  
86643621,0.00336510461969363,0.0147577170208696,-4.44569508262883  
"Adamt5",950.324278401837,-0.0689770423677536,0.248598894408318,-0.2  
7746319038113,0.781424466452173,0.858793869499128,-0.0105001234936624  
"Zbtb1",1405.68757797033,-0.262484602570949,0.123011606740758,-2.13381  
980388343,0.0328575341467827,0.0843234613130906,-0.64914939633508  
"Fan1",171.832078869353,-0.234430277424471,0.255730498179327,-0.916708  
328077789,0.359295500888629,0.50439510953463,-0.160442996585533  
"Armcx1",767.194490668025,-0.296869520867391,0.143249795601829,-2.0723  
9053724416,0.0382290351299453,0.0947368742963489,-0.699618142511976  
"Crlf2",976.389026130961,-0.79241736985799,0.220584869160734,-3.592346  
89520149,0.000327713200046472,0.00248049377892318,-4.75394765230339  
"Cysltr2",72.7346393639567,0.0663847886242282,0.358145338339904,0.1853  
57120469413,0.8529489384906,0.906427978408292,0.00652188739939357  
"Tomm6",3989.85886221167,0.203625991397316,0.304097854717516,0.6696068  
00042932,0.503108478062145,0.637940372325921,0.0915320131239312  
"Fam160b1",1450.73315415322,-0.19235032478066,0.0984210226422203,-1.95  
436218418387,0.050658399569868,0.1176017948343,-0.411716441456615  
"Catsper2",209.392239804311,0.296074128367187,0.275196736926019,1.0758  
6351376972,0.281988301798396,0.425920513476267,0.252700020058633  
"Fndc3a",2987.27741638346,-0.14950144530183,0.0908337749479232,-1.6458  
7946925626,0.0997885766548989,0.197010699434712,-0.242864685249048  
"Cryzl2",8422.92198920668,1.86687003308422,0.424206798233233,4.4008489  
2759733,1.0782818109812e-05,0.00018155732945174,16.081104752788  
"Prss35",63.3045756579364,0.0745390654640255,0.992493456800853,0.07510  
28280874421,0.940132897693661,0.962848578591817,0.00282198333525729  
"Strc",3.74968212271689,-0.721428120700018,1.07280704489952,-0.6724677  
32319551,0.501285975672406,0.636457247747644,-0.325968661535037  
"Larp4b",8175.44920271645,0.937003286524966,0.161155603108847,5.814276  
81352226,6.08965728199145e-09,5.54841764879763e-07,13.49714149225  
"Crygs",5.79687603465926,0.0236169632910384,0.767717161854095,0.030762  
5834936419,0.975458880334107,0.984649888628827,0.000365334206258881  
"Cdc14a",1649.21933229275,-0.298258534663069,0.314604932771584,-0.9480  
41507281823,0.343108323946572,0.48771058542759,-0.214159503737766  
"Asprv1",47.3030414654786,-0.175543979543125,0.386367440736299,-0.4543  
44649768085,0.649580784039593,0.761149406682932,-0.0479104478703209  
"Otud7a",3.2109291998443,-1.05566207559316,1.53434402846036,-0.6880217  
57840364,0.491439079895277,0.627839023705813,-0.491380585593242  
"Idi2",2.41089270901206,-0.232443879183931,1.00941317460762,-0.2302762  
48647426,0.817877115545692,0.883194948987035,-0.028871696744988  
"Ppip5k1",3069.78752150118,-0.130526960645227,0.293065589834913,-0.445  
384805219726,0.65604169110251,0.7656892142228,-0.0348479466090888  
"Ttc7b",1486.9939871816,-0.11066037318645,0.358732384175557,-0.3084761  
17763304,0.757720070046376,0.842854396336032,-0.0189186143384587  
"Acsm1",4311.2878036069,2.41387103735613,0.944989428123836,2.554389462  
4817,0.0106374199112044,0.0355943733359641,8.05163027859662

"Casp4",991.433227859133,-0.781784187164095,0.337145576841022,-2.31883  
269681079,0.0204041095711481,0.0583513242033214,-2.22126247978311  
"Idua",876.303419758097,-0.483382457965898,0.15807538831966,-3.0579235  
8383078,0.00222876402864911,0.0108695450301652,-2.18575417452681  
"Arhgef5",3339.32063876893,0.42093545126759,0.14557305512966,2.8915753  
0487127,0.00383315717658815,0.0162511195105709,1.73408294038337  
"Gtf2a2",2440.48114019552,0.276850012874059,0.148037412905208,1.870135  
44374309,0.0614650116254882,0.136024227674809,0.552294254594138  
"Angptl1",41.8147824017612,-2.15790878103862,0.918909693162781,-2.3483  
3607382174,0.0188574978354974,0.0549427234639161,-6.26109470375893  
"Znrf1",4251.99956921712,-0.0358950155373484,0.199908254919124,-0.1795  
57445248423,0.857500015371466,0.909560183859909,-0.0034026360780399  
"Dph5",702.826689327081,0.283838084006891,0.187251675883389,1.51581064  
718294,0.129567239029783,0.239550732657189,0.40560179989622  
"Fam20b",3730.32691424889,0.0864371014945206,0.236344725839624,0.36572  
4689592498,0.714570520956763,0.810653169117063,0.0181444419682323  
"Rbfox2",2045.55153674264,-1.15661698325527,0.236004614399594,-4.90082  
359702058,9.54357207577045e-07,2.67741824940104e-05,-12.1769474249874  
"Adgrb3",25.0442408602344,-0.731186846284964,0.589352722334447,-1.2406  
6084464445,0.21473106466484,0.349513840790971,-0.76863247216815  
"Apol6",1143.24828568485,-4.14959793963422,1.39469425262268,-2.9752742  
8096231,0.00292726687495875,0.0132765409462539,-17.9335524480187  
"Myo6",13463.6141966011,1.36994293985568,0.356779174353674,3.839750294  
6673,0.00012315951192943,0.00116911595111978,9.24917991397816  
"Tmem35a",425.410392653885,0.0430985323986975,0.486084553146761,0.0886  
646821415966,0.929348401518562,0.956303244594089,0.00192565168385555  
"Fa2h",399.800746028466,-0.36513864411589,0.444810160399449,-0.8208864  
73879077,0.411710936293793,0.555242335307695,-0.214829547776146  
"Igf2bp2",416.498806264288,-0.0761881397488318,0.186708973210596,-0.40  
8058265431606,0.683230899050062,0.786972027583835,-0.0182518268887422  
"Ndn",352.746445019282,-1.82099921724913,0.317550660927512,-5.73451559  
486696,9.7791427298114e-09,7.84665534756636e-07,-25.5996220745654  
"Reep4",1237.75556239653,-0.940715359828315,0.284548962644585,-3.30598  
766231776,0.000946422548707269,0.00563117084366626,-4.8723767815277  
"Myo5c",638.365908352251,0.12014225646463,0.266165952630574,0.45138100  
9769428,0.651714967730238,0.762779184873292,0.0325329243679357  
"Spata2l",483.517104722258,0.725073265412517,0.250213120781949,2.89782  
271667676,0.00375762928505916,0.0160214860704316,2.99732568555547  
"Lgi3",25.7239776799635,-1.57062829150341,0.834234191563111,-1.8827186  
7466918,0.0597385032767742,0.133133082282609,-3.16702436161309  
"Rfwd3",1865.51648044055,-0.0820333238593634,0.135606737315501,-0.6049  
35458837162,0.545221881559797,0.675095970448525,-0.0322309273797795  
"Caskin1",81.2436771844822,-0.350261501800337,0.36123824227657,-0.9696  
13570238146,0.332239146191726,0.476989829353233,-0.259284618002704  
"Pank1",7490.00445774969,1.68800651469078,0.424583349140952,3.97567760  
984052,7.01791442602861e-05,0.000752454088464517,12.1404307857216  
"Cplx1",4.84749338343022,0.404517504888799,0.923444974335557,0.4380526  
3565364,0.661348127970087,0.770031274500517,0.10571019260934  
"Map3k13",923.418260900064,0.325916898993743,0.282105806847297,1.15530  
021390223,0.247967508402313,0.387316388594753,0.309136538932085

"Pcgf3",1949.45091834588,0.0119565037676939,0.113796303234815,0.105069  
351356889,0.916320778735618,0.948726770591923,0.000629323817956323  
"Pdpr",406.152481247047,-0.905216047646674,0.459487356263649,-1.970056  
48862135,0.0488318968965893,0.114365444848718,-1.96283092084627  
"Pik3c3",1231.84844667112,-0.151536017083349,0.150978448342423,-1.0036  
9303531098,0.315526595115772,0.460771351898851,-0.117418189253961  
"Hacd3",3137.72355542467,0.106867002787929,0.1449597567634,0.737218419  
608385,0.460989533769118,0.600265388635653,0.0545431449964588  
"AW554918",449.12411674634,0.0710152572690323,0.152398506338999,0.4659  
83945479518,0.641226992251892,0.754762686080735,0.0199802777189182  
"Clec18a",147.385897722169,-0.114318003446222,0.553889764627714,-0.206  
391254626376,0.836485301577206,0.895748594582182,-0.0125858968090341  
"Nat8f2",1376.547122213751,1.41338712582764,0.56922406050416,2.48300664  
693583,0.0130278656638848,0.0414654464111045,4.49866255461506  
"Piwil2",29.9292506492086,-0.809750735920008,0.50361331020159,-1.60788  
191955426,0.107861042409442,0.208596965373865,-1.26916385574986  
"Vps8",2192.63061520589,1.43479656659972,0.268554326169201,5.342667858  
18129,9.15884915491337e-08,4.26203438717186e-06,17.7423556674547  
"Ddx19b",889.081622212153,-0.114852954758004,0.149022211592486,-0.7707  
10309091904,0.440878660023135,0.582596758971309,-0.0620504570521495  
"Zfp7",1348.79166900069,0.525604533965509,0.210019376250971,2.50264781  
920606,0.0123268137662538,0.0397429311221036,1.69524454320547  
"Cep350",1995.56921975878,0.301072706705528,0.155073343563482,1.941485  
87879179,0.0521993706151058,0.120191701494253,0.637872898141887  
"Gabrb3",313.364280360667,1.41141917646878,0.496325700736537,2.8437358  
2583829,0.00445879995519825,0.0181773578262783,5.65637319533843  
"Qsox1",1814.91731172491,-0.666375645798793,0.214524563770544,-3.10629  
064609846,0.00189450404955498,0.0095796265451823,-3.09739174806377  
"Ucp2",9877.98204017836,-0.488942046439388,0.243287051228027,-2.009733  
12788898,0.0444594417674933,0.106322536162412,-1.0958550572467  
"1300017J02Rik",9.15732337257568,0.108352622723624,1.05241678876444,0.  
102955999828578,0.917997892358643,0.949731665874555,0.0055883722520874  
6  
"Arhgap39",971.790303835368,0.286661852757651,0.240746200919715,1.1907  
2222806643,0.233762648780315,0.371346270646781,0.283973052758273  
"Acbd6",1929.5648298934,0.0584570511818966,0.242184650307311,0.2413738  
9016075,0.809265347209998,0.87822551595972,0.00759075720240049  
"Fcsk",1076.91224461219,0.413491745847416,0.189119473186256,2.18640491  
579724,0.0287859942895261,0.0762283466871084,1.06433680171274  
"Stard9",1689.99824732737,-0.505138200578037,0.245608023704077,-2.0566  
8443953873,0.0397165899080317,0.0973713152303285,-1.17657982639823  
"Smyd5",864.983237901318,-0.276504841391119,0.213020428098629,-1.29802  
030659284,0.194280357133401,0.324655331109621,-0.311065507533496  
"Lrrc24",50.8601663872247,-1.12545011423162,0.52745704334583,-2.133728  
4778539,0.0328650135159484,0.084327152721932,-2.78329594629391  
"Ccar2",2587.12163111214,0.0705240264328775,0.0715909129873377,0.98509  
7458463075,0.324576201662124,0.469444906164831,0.0533305743678213  
"Foxn3",4701.12239786542,0.352505780706442,0.220792620027922,1.5965469  
3468406,0.110366735678824,0.212284760014374,0.546322870135184  
"Akr1c14",4636.98026454782,1.96869228586328,0.676014867732126,2.912202

6449918,0.00358889721900029,0.0154902300360012,8.20461521635483  
"Adra2a",142.133405755845,-0.138603854731103,0.410159840727339,-0.3379  
26439812625,0.735418622326166,0.82703842992938,-0.0263214425010582  
"Sfxn5",1282.71942041567,0.259846492957708,0.386794649810307,0.6717944  
34295155,0.501714572465942,0.636877000907614,0.117237211532456  
"Vav3",825.815305114326,-0.0445025060013817,0.201982384606711,-0.22032  
8649392048,0.825615209343878,0.888500129803893,-0.00526110785628901  
"BC034090",4184.34621622075,1.36646102189924,0.410134110849102,3.33174  
194916451,0.000863042423545873,0.00526355995442522,7.1697494937716  
"Emx1",1185.08212104458,2.08571531945395,0.811499898742476,2.570197880  
10576,0.0101640439079023,0.034275082690467,7.03581990976201  
"Lrrc14",1030.89517819915,-0.0535142693870175,0.118734178622471,-0.450  
706527874946,0.652201076898132,0.763134120245071,-0.0144660566627609  
"Egr3",168.649584835988,-1.65173479442597,0.31567982882531,-5.23231021  
941537,1.67404491889098e-07,6.70236711058241e-06,-19.6771988522744  
"Sf3b3",3200.19563462963,-0.426189282082075,0.121553546154368,-3.50618  
550890182,0.000454578276392287,0.00320814928903259,-2.44720487809635  
"Spr",5078.68691477676,1.0094980326221,0.348479293068942,2.89686662220  
811,0.00376909960227597,0.0160558635928748,4.17092400570703  
"Fndc3c1",1.33700849301298,0.67234609126234,1.46168938364309,0.4599787  
74414162,0.645531455888429,0.758135906933658,0.186167665824901  
"Fkbp1",507.125130165151,0.239360572666647,0.264956965009557,0.9033941  
51793719,0.366316742725878,0.511233544461325,0.160593891976557  
"St18",7.49049938511059,-0.609865417327772,0.754710435340528,-0.808078  
686566192,0.419045286206771,0.562017703451704,-0.351417827069342  
"Gadd45gip1",1650.48032906484,0.689420417652754,0.185659957158941,3.71  
335008476033,0.000204533644211932,0.00172491219500184,4.38649196200993  
"Mnd1",166.317565233744,-1.07080243029665,0.428818545768916,-2.4970991  
596844,0.0125213937487594,0.0402251116528057,-3.44077069736139  
"Rbm4b",1320.18703024286,0.377663229108615,0.126553407112881,2.9842201  
6225729,0.00284302124634185,0.0129729062160481,1.64090603106426  
"Recql4",179.657494762976,-1.69894139851148,0.485498526044357,-3.49937  
49875077,0.000466350227211429,0.00326694747661703,-9.72456935160745  
"Mtss2",1502.54941155074,-1.13298943223734,0.212955752357111,-5.320304  
42801753,1.03593757834283e-07,4.69737462849499e-06,-13.9000885480665  
"Calm4",0.247490694217328,-0.064973835720255,4.78471990595238,-0.01357  
94439376535,0.989165504321392,NA,NA  
"Tmem131l",1159.19192323076,-0.46463666548624,0.325180172951161,-1.428  
85914989665,0.15304472060107,0.272318485333059,-0.604391473642054  
"Nrxn2",394.926012063304,0.0802589608256899,0.510979170465272,0.157068  
948138551,0.875190509583112,0.922100125725339,0.00650911930958848  
"Exoc6b",1128.69525468915,-0.0556237234234503,0.184124712906465,-0.302  
098086375331,0.762577291188252,0.846115505390862,-0.00929469067079727  
"Clcnka",1364.23900896595,1.9050078224954,0.604728730682765,3.15018573  
756957,0.00163166693172275,0.00859147767613561,9.06209275056402  
"Rpap2",682.682493203148,0.203831389065595,0.197647725269904,1.0312862  
8871011,0.302406586230507,0.446928190580036,0.164157106273698  
"Npbwr1",0.797662443327109,1.03664520406992,1.4085611793244,0.73596036  
8130502,0.461754817003593,NA,NA  
"Tlrl3",275.495798237581,-1.06464916172272,0.408009305660555,-2.609374



70531239,0.00907078570402403,0.0313529834527673,-3.68629007221716  
"Asb13",2745.75919988198,0.325819263867312,0.192034369022589,1.6966716  
1938593,0.0897587611608812,0.181672031196057,0.555701776595851  
"Dysf",2533.35133317022,-0.0525343102335242,0.188436511746069,-0.27879  
0504805765,0.780405601740964,0.85803250382008,-0.00804370144398058  
"Tubgcp5",640.544925469783,-0.0587766168762312,0.173650338039327,-0.33  
847683534552,0.735003880743948,0.826648853340777,-0.0111896147249001  
"Atp7a",184.761723266534,-0.141467142551925,0.378132839816922,-0.37412  
0223518322,0.708314873246223,0.806418509783654,-0.0304369992486276  
"Atp6v1h",5389.80507887467,0.559496165800321,0.200830741127824,2.78590  
898314823,0.00533778569747468,0.0209072208777343,2.16394132283306  
"Lpcat2b",0.0965030460389225,0.886496493659922,4.78471990596623,0.1852  
76570224,0.853012114121315,NA,NA  
"Tasor2",1194.1864986408,-0.3873872162228,0.195428525239151,-1.9822449  
959582,0.0474518268749857,0.111808546272927,-0.848752714919197  
"Ephx4",29.8746941704641,-0.551220069968621,0.409834786722674,-1.34498  
11675982,0.178631316289573,0.30570994514299,-0.653261112552392  
"Tmem87a",2756.03106962057,0.150484790139621,0.0985656457939239,1.5267  
468591871,0.126823970346356,0.235865487773106,0.21737431678262  
"Alg3",536.717785329107,0.287490054708652,0.124156865290424,2.31553892  
759909,0.0205834567409184,0.0587178111974291,0.815037804030881  
"Tcea1",4239.50891353662,-0.0307779474640467,0.105377280449312,-0.2920  
7384488207,0.770230163962008,0.851274060036913,-0.00495590072789858  
"Ppp1r16a",3093.71946519741,0.572137030411279,0.155138159196705,3.6879  
1942210586,0.000226095219709667,0.00186480735782533,3.595650965062  
"Tpsb2",6.39671631892438,-4.02157748251486,1.55608902083935,-2.5844135  
0633374,0.009754476739106,0.033140405551331,-13.7015226448848  
"Dnah8",43.509404163001,-0.983090734568151,0.466092766126444,-2.109216  
88988722,0.0349258646885278,0.0882786123464013,-2.38621427656683  
"Fgb",122.742888324446,0.321783538445387,0.490208791867581,0.656421393  
870696,0.511553028935828,0.645750418114125,0.140729520473142  
"Foxh1",2.28145060646723,1.07679333444006,1.16536762874989,0.923994547  
192935,0.355489154803422,0.500492998798261,0.745315071253888  
"Mrpl15",1736.21421585236,0.151916028953481,0.273560722477787,0.555328  
36577377,0.57867008018223,0.703554855857899,0.0534151083230573  
"Pla2g4c",49.5291604299593,-0.784543078778304,0.324853614107776,-2.415  
06649366695,0.0157323373621554,0.047835303886146,-2.38500416304668  
"B3galt2",1502.07088149752,-4.00501817809212,0.817783123737372,-4.8974  
0869166959,9.71087327124965e-07,2.72043975636244e-05,-42.1012794405038  
"Gm28042",372.476039483269,-0.459372762541239,0.277282461159997,-1.656  
69606587981,0.0975809388034209,0.193612816199155,-0.754241799210281  
"Kcnk10",11.6452596152044,-0.642072634304262,0.728684219616469,-0.8811  
39754394855,0.378242182418554,0.523177036858622,-0.415957362353613  
"Ston1",239.184468402469,-1.44304581340159,0.343997623939819,-4.194929  
59536849,2.72956358011363e-05,0.00036254108096087,-11.4323468482896  
"Engase",697.787624729102,-0.371405422030563,0.182234939800024,-2.0380  
5824743666,0.0415441080560012,0.100758537102215,-0.852385971507127  
"Fgg",435.244145474519,1.16983012387288,0.670954408029925,1.7435314678  
2025,0.0812408225229091,0.168227862951538,2.08514719971044  
"Cdk10",2499.82578572945,0.174932526092803,0.141360581609152,1.2374915

5600162,0.215904647258435,0.351072371966055,0.183112876363688  
"Klf9",13106.572861154,1.23488779704403,0.186447590648002,6.6232435224  
9419,3.51401386547972e-11,1.10510068305038e-08,22.6240635654389  
"Ppargc1b",757.065442091034,0.510572873488746,0.430005082698532,1.1873  
6474063191,0.235083781572916,0.373036775227565,0.503464816357742  
"Best4-  
ps",0.363706797611643,-0.591314394033538,3.15189705730233,-0.187605871  
41118,0.851185623253044,NA,NA  
"Lgals3bp",4804.93915048653,-1.23671609464243,0.245351548601698,-5.040  
58809365865,4.64103426784156e-07,1.49078889875411e-05,-13.744392752032  
9  
"Rbm46",10.8054072198623,0.368896289872999,0.658803558193472,0.5599488  
4254202,0.575514332269072,0.701117054081997,0.130987851136475  
"Zfp267",733.474417637415,-0.0304086665681711,0.166742327062768,-0.182  
369210648741,0.855292986943279,0.907910641301179,-0.0029377605350221  
"Pxxk",2330.5485021749,-0.0957220428409474,0.11617587390223,-0.82394080  
3075036,0.409973194556942,0.553513680875572,-0.056616602780421  
"Cfhr2",35.0410730881196,-1.35308559871217,0.516246494062396,-2.621006  
85287876,0.00876704996386167,0.0305522681314343,-4.71999062081464  
"Map9",640.116473419186,0.803485189781606,0.199210794397569,4.03334162  
795453,5.49892455724977e-05,0.000621482488983404,5.932454818327  
"Mapkbp1",1500.22644730537,0.00760187925281763,0.198041892150919,0.038  
3852081509328,0.969380554476441,0.981104700294921,0.000145014185875523  
"Ccp110",1071.3187850534,-0.00388379646893092,0.150497998468824,-0.025  
8062998076048,0.979411837003793,0.9868009506976,-5.16037353617723e-05  
"Zdhhc15",228.282231010555,-0.712226546277723,0.226186205874874,-3.148  
85049476326,0.00163914029816771,0.00861686641511838,-3.38594906381035  
"Usp36",2252.73706077,-0.122690277503803,0.194193234040496,-0.63179481  
0514449,0.527520965096687,0.660052863855175,-0.0509698784277938  
"Gucy1a1",3260.4773477617,-1.39921874033168,0.358977985933401,-3.89778  
4251849,9.70768429743127e-05,0.000967196566763314,-9.71212952330464  
"Chmp2a",5975.9442646736,0.223955565784269,0.145419445311272,1.5400661  
5349749,0.123544228994319,0.231510367797332,0.327676246077512  
"Gde1",5137.7103172781,0.168592977173372,0.316891173389167,0.532021688  
613987,0.594710974067297,0.717509719223078,0.0559676058734769  
"Par1",2417.29397596483,-0.146465690680779,0.277791515242386,-0.527250  
41134889,0.598019705396499,0.720120319652973,-0.0480901011316587  
"Rbm34",1436.62853836909,0.760438503084231,0.139702701696164,5.4432626  
8462644,5.23134133849445e-08,2.82550397279681e-06,9.71598877363638  
"Vhl",1209.82234510666,-0.120338067310732,0.128169793621861,-0.9388956  
9383068,0.347784300327998,0.492632933555417,-0.0851982612658101  
"Ndufb7",6306.13175095214,0.715739951196373,0.25049202545353,2.8573362  
76077,0.0042721296751665,0.0176329348870441,2.89014849322828  
"Brk1",5604.62405118357,0.128147059504844,0.151232468638114,0.84735150  
2351581,0.396799227845538,0.541299331458217,0.0786544687151256  
"Mga",2493.26099751386,0.0714480443439622,0.252497978248522,0.28296481  
7538615,0.7772038067789,0.855911879388591,0.0111164478047398  
"Zswim5",343.864600737537,0.975003937557458,0.34730637343473,2.8073309  
6808744,0.00499538885269705,0.0198775697652831,3.82022467516576  
"Trim36",230.571567375755,-0.31467194125084,0.236112796761666,-1.33271

870718838,0.182624131831221,0.310743112177777,-0.367785013544236  
"Aspm",111.110790651033,-0.857549104762774,0.431669450892139,-1.986587  
42931764,0.046968135400023,0.110923534887312,-1.88567689503511  
"Ppp3r1",3162.17747527371,-0.397456419236196,0.202106211104069,-1.9665  
7201708431,0.049232572157013,0.115017576314095,-0.859567203276822  
"Tnks1bp1",3719.58107648588,-0.642365859762947,0.214691895034975,-2.99  
203591108225,0.00277123662227216,0.0127497809488113,-2.80215481122982  
"Jcad",1471.16784131433,-1.23306022473414,0.258333592391833,-4.7731315  
6727939,1.81383212707062e-06,4.39330420045005e-05,-12.371100699485  
"Zfp446",544.068607670388,0.13875637469717,0.157162955612175,0.8828821  
91650648,0.377299926347916,0.522549565232802,0.0900578044203046  
"Fancd2os",109.149837890472,2.77284629516815,0.912618834950044,3.03833  
998267188,0.00237885405167333,0.01139841097336,12.4064943861355  
"Zbtb41",1524.26440685112,0.155416132185713,0.170692336713065,0.910504  
450161513,0.36255653589629,0.507438614378426,0.105431123059647  
"Slc16a2",5462.91187975727,1.35786977938101,0.291088981805269,4.664792  
77559666,3.08928198803529e-06,6.79084782443203e-05,13.0319510756612  
"Cdkl4",18.3640124884433,0.202367713066069,0.416456627782988,0.4859274  
6414765,0.627018595302441,0.743559699015144,0.0599628124591939  
"Rnf225",29.195619525211,-0.891194536161307,0.411608874864469,-2.16514  
898143232,0.0303762779371672,0.0794144732322045,-2.25746228315145  
"Rfc3",505.592844379612,0.0545711612981507,0.197241194811539,0.2766722  
30414608,0.782031796707141,0.859027182131512,0.00829234518443994  
"Zfp944",833.979753913698,0.463142010656257,0.126027392604746,3.674931  
30726577,0.000237913417085605,0.00193526733681065,2.89348425198069  
"Gria2",33.5196647175895,0.588451782177636,0.504396076156268,1.1666462  
3298007,0.24335326440283,0.382191055120933,0.565993314606118  
"Coil",530.030546014612,0.147797229069327,0.136222087051987,1.08497257  
873404,0.277933800417246,0.421559956478838,0.127666251226418  
"Tesk2",600.193798869973,0.725175193183612,0.221743488750915,3.2703336  
5114141,0.0010742070106908,0.00621879106129726,3.68402033470116  
"Dnah17",28.9610627553682,0.457976357243148,0.485900433107595,0.942531  
280151662,0.345920704153107,0.490670878042869,0.326070778717276  
"Ttc37",912.200364341912,0.105071793772617,0.114571719900296,0.9170831  
49873756,0.359099070040664,0.504191954176775,0.0719529775534504  
"Kcnk1",2192.09645412683,0.496084555800458,0.232802271432943,2.1309266  
1315958,0.0330951885100688,0.084813450231217,1.22398998884474  
"Pqlc1",1787.97765737823,0.0916672337709694,0.180465510333626,0.507948  
7687232,0.611489272037386,0.731102393069962,0.0287103386252912  
"Scaper",838.03493662737,0.326680934576672,0.319942810392977,1.0210604  
0193689,0.307225822355604,0.451892658742423,0.259486131769282  
"Rxfp1",101.246163978134,-2.16613293360387,1.2861758004932,-1.68416551  
825438,0.0921496851535932,0.185456876626582,-3.64978863471992  
"Pds5b",1706.28703617398,-0.100609930993419,0.0887764061983031,-1.1332  
9583052374,0.257090042121029,0.397962975649082,-0.0927016185662729  
"Cpsf1",3561.37570974735,0.39840557989552,0.235565907941282,1.69127011  
364831,0.090785225305169,0.183224337335699,0.676111794882978  
"Fancd2",82.7170206946308,-1.05876524118914,0.330823818365147,-3.20039  
000342027,0.00137241743069439,0.00751084002638148,-5.17885273390554  
"Cct2",7863.39214845608,0.110602495045351,0.0950307192964966,1.1638604

4285606,0.244480572563801,0.383620732278136,0.105968349030653  
"Cd226",182.046768783473,-1.591860578071,0.501821963255806,-3.17216203  
081878,0.00151308560655932,0.00810053354110201,-7.66612252586023  
"Ccdc182",1.3452241905428,1.47508811467189,1.82834790407877,0.80678743  
4372416,0.419788959836591,0.562778131112064,0.847983626863906  
"Rpap1",948.893877403114,-0.100787105846812,0.152290576107798,-0.66180  
7896605966,0.508094344703779,0.642674248007414,-0.0445597226942764  
"Ccdc17",314.891993897163,0.463406426578418,0.16813381097673,2.7561763  
0913365,0.00584814643914613,0.0223802079039198,1.76074899621582  
"Fgd5",1577.38675117422,-0.470416322241132,0.159252830350651,-2.953896  
14869227,0.00313789582027894,0.0139750325956598,-2.0089048729562  
"Galnt17",275.109618947544,-2.10909077137391,0.339978304865138,-6.2036  
0399823317,5.51845431371453e-10,9.97814125218234e-08,-33.9991420439114  
"Lyl1",563.639196547823,-0.810801769838895,0.285984831965059,-2.835121  
58413338,0.00458082483082827,0.0185591455059297,-3.23249848976484  
"Gbp1l1",4412.61459980539,-0.0898109645639363,0.122817966536711,-0.73  
1252658682405,0.464624841128483,0.603467569432664,-0.0453601931627205  
"Phka1",1021.51408780242,0.0594962302838342,0.126499521797552,0.470327  
709056885,0.638120903650408,0.752370526252533,0.0169282455566878  
"Myrfl",4.57948813024606,-0.309280839422922,0.696710782309988,-0.44391  
5678177798,0.657103548919816,0.766568421796476,-0.0822165336173464  
"Ypel4",138.028223552509,-0.784383572152031,0.321083619791054,-2.44292  
615320106,0.0145687180080166,0.0452984237485801,-2.42726166318173  
"4930590J08Rik",16.5525201402829,0.0364110729789408,0.478051822920787,  
0.0761655352687027,0.939287401884432,0.962488215363814,0.0013921211811  
5808  
"Poglut1",1438.81750046645,-0.360859781434217,0.0885856319639856,-4.07  
357009747274,4.62979081184953e-05,0.000546108053535645,-2.711029007123  
77  
"Farp2",472.884505711648,0.484196857797569,0.204807221863846,2.3641591  
0235558,0.0180710499621372,0.0531527126507394,1.42091738688487  
"Zfp551",33.1482833814726,-0.335600021108016,0.464759431851432,-0.7220  
94051477575,0.470236655197139,0.608203933866257,-0.166875444481029  
"Zdhhc5",3584.64112652597,0.0807268048973882,0.176467443224091,0.45746  
0047148049,0.64734041284221,0.759735899250053,0.0221824672192717  
"Ccdc174",1325.95623079442,0.144801806056278,0.1939530539145,0.7465817  
27556145,0.455316081565501,0.595502613252223,0.0750579440382128  
"Hdlbp",11682.2754054912,-0.0231042141993617,0.183374347829598,-0.1259  
94799560686,0.899736041119896,0.938633136958573,-0.00146320309115256  
"Fstl5",0.385409917755174,-2.58557631080884,4.73743584408327,-0.545775  
477685475,0.585220281695948,NA,NA  
"Ctnnd1",6124.14100293748,-0.485670903714104,0.158717110614218,-3.0599  
7823318866,0.0022135307827334,0.0108168980455478,-2.19846012431328  
"Meak7",625.465394164096,0.159351168881618,0.148069945497791,1.0761884  
7529052,0.281842972897557,0.425766970291823,0.136064083125743  
"Ano7",14.0157688665274,-2.08657241766931,0.790902951566761,-2.6382154  
8969549,0.00833436026079929,0.0293771536893514,-7.36046347664042  
"Ccs",5285.28975872221,1.39603797554447,0.259081784992729,5.3884065048  
558,7.10851258291796e-08,3.52676280767772e-06,17.5274384904506  
"Golim4",2474.03368175819,-0.729688346290371,0.139300079272004,-5.2382

4788976285,1.62108228940697e-07,6.57128118063559e-06,-8.70722636813701  
"Kctd7",210.429817660754,-0.441770085555647,0.201164191370233,-2.19606  
721527585,0.0280871327577827,0.074763537817235,-1.1456975731703  
"Tmed8",1082.65468699788,-0.0135507742859174,0.14507270851431,-0.09340  
67780541974,0.925580405953564,0.954461960825185,-0.000631567564452016  
"Atp2c2",40.074873164875,-0.844462577003303,0.463764888124845,-1.82088  
510498875,0.0686243238339379,0.147914776267314,-1.61386848170151  
"Scn11a",3.15446280932001,-1.64349048425609,1.23523338003637,-1.330510  
09697268,0.183350261845349,0.311516504484194,-1.91680781366059  
"Vav1",965.597993979901,-1.05412517055232,0.505200459240988,-2.0865483  
2209779,0.036928982829849,0.0921829864570985,-2.51301300164905  
"Ptgdr2",1.15738598702307,0.372664983140435,1.61024796545439,0.2314332  
89242054,0.816978205971024,NA,NA  
"Tpst1",775.482581880307,-1.70856142681439,0.283668461313225,-6.023092  
65860826,1.71115413821253e-09,2.34958333710337e-07,-26.0792383913067  
"Srsf2",15665.9484384756,0.4032109294188,0.138767384746145,2.905660650  
42167,0.00366478666825054,0.015739209351883,1.67397060305019  
"Mks1",606.551553012843,0.0737958372917037,0.170525864360232,0.4327545  
12452209,0.66519312260745,0.773078351588488,0.0189931944082324  
"Pomt2",1110.79278255238,0.135820223448901,0.0873079215270635,1.555646  
0521947,0.119792281468488,0.226262705034639,0.201836803385996  
"Tspan8",3432.78921208785,-0.140744074752649,0.357698419300857,-0.3934  
71335511468,0.693971391175144,0.795944363831351,-0.0321214558343171  
"Sik3",2521.70361585679,0.380347903103522,0.116481528762375,3.26530658  
675884,0.00109345653106394,0.00630387255968936,1.92706731690089  
"Tmem63c",6.09428987740665,-0.372053490931365,0.721511517007686,-0.515  
658422854256,0.606092998196495,0.726745051278228,-0.118751865421869  
"Zbbx",1.07288486811133,-1.41282640425551,2.2239836328085,-0.635268346  
139469,0.525253414530061,NA,NA  
"Exoc3",2010.95142363598,0.251860089658394,0.163894506156844,1.5367207  
5754247,0.124361705702152,0.232751443442174,0.367157649532152  
"Ino80",1154.19481255683,-0.0241000908455793,0.121286689008827,-0.1987  
03510191668,0.842494678043389,0.89912212547838,-0.00256271708867513  
"Tspoap1",500.785479240396,0.311929742853262,0.377738284378151,0.82578  
2706581554,0.408927365741192,0.552662769614041,0.18497660940288  
"Cipc",2174.67319196726,0.358546177520965,0.124140710992232,2.88822397  
306393,0.00387423897762486,0.0164003281775357,1.47378754574207  
"Lrrc58",6247.51610240654,-0.296950297307462,0.283086921296811,-1.0489  
7215295975,0.294190935122749,0.438341345944014,-0.244911938354464  
"Mab21l4",143.16453176633,0.392503419132101,0.491047282590039,0.799318  
992382636,0.424105468944557,0.567238882801549,0.222539529477107  
"Ogt",16614.7534492396,0.151556054754911,0.14410357184274,1.0517161567  
6747,0.29292979602874,0.436896287230809,0.125497421987309  
"Scx",566.051876782414,-0.280708254105425,0.557189602325602,-0.5037930  
58832762,0.614406805885958,0.733795019999878,-0.0868863777729846  
"Zfc3h1",3256.38608315314,-0.0255335182698611,0.142613536603107,-0.179  
039934623604,0.85790634498346,0.909892184208415,-0.00241110881949597  
"Emid1",624.199353014499,-0.719991726453578,0.16744912556355,-4.299764  
02701685,1.70980067023888e-05,0.000253884162368359,-5.96054686936929  
"Ccnd3",6056.11496520335,0.150442895888751,0.0717992607763727,2.095326

52929844,0.0361419757146738,0.0906542310099544,0.361168661653054  
"Irf2bpl",3442.50499318188,-0.135937609235633,0.159309856298785,-0.853  
290639975735,0.393498149389338,0.538038353211312,-0.0842575874870268  
"Faah",3576.05403327878,0.737037285910181,0.320997485575035,2.29608429  
670361,0.0216710619894536,0.0612913209559567,2.05789435711865  
"Zbed5",146.40229699527,-0.280120017525194,0.205288265159905,-1.364520  
36022128,0.172403850680829,0.297691310713319,-0.339420920865315  
"Rhbdd3",890.415652591349,0.312895848350741,0.182408748972347,1.715355  
48658456,0.0862800712918949,0.176137454721952,0.543340698195311  
"Rnf43",411.648505980548,-0.189336722428363,0.325949453181241,-0.58087  
7558101267,0.561322978470663,0.689516725650283,-0.0703886386961968  
"Nsf",2022.68274637753,-0.184617860383796,0.13125788546091,-1.40652776  
582155,0.159567465646026,0.28079841562872,-0.234486513600657  
"Hsd1l1",1263.29539582101,0.020409458449361,0.0879680318723117,0.232009  
947420285,0.816530287666896,0.882692059184005,0.00254666942895498  
"Chmp7",2553.1635662742,-0.04955244540432,0.128489305860742,-0.3856542  
38478224,0.699752758218382,0.799940154769115,-0.0110610156293988  
"Lsm3",1249.54953958789,0.116892835935935,0.117305299224467,0.99648384  
77779,0.319015111221206,0.46408689387384,0.0897366982611854  
"R3hcc1",1215.28844475247,0.0815011930539029,0.106146465756786,0.76781  
8245033677,0.442595173517258,0.584085018896853,0.0438239027209141  
"Gas2l1",1731.14875396705,-0.579183319801152,0.14147692281377,-4.09383  
600011959,4.24294473916296e-05,0.000510357412240589,-4.39044081425918  
"Chchd4",1600.99938414486,0.362038049891663,0.214049658815532,1.691374  
10400484,0.0907653749563555,0.183203238188304,0.614436189455503  
"Loxl2",2002.26044503912,-1.25741885058331,0.351211930919637,-3.580228  
17530942,0.000343294301295751,0.00257345339741044,-7.4973681297757  
"Polq",78.9448584339098,0.17716912748517,0.302186851296595,0.586289994  
832632,0.557680653396821,0.686771766559162,0.0665718771323028  
"Rasl10a",84.4384861521936,-1.00213074821514,0.319589149126807,-3.1356  
8452168416,0.00171453531439318,0.00891229260464894,-4.73038158511243  
"Efcab14",1783.25110326067,-0.187692064462379,0.154243205108786,-1.216  
85791169862,0.223658281523061,0.359720298039813,-0.191901715818193  
"Mrps17",2824.79524453528,0.328217510441772,0.199810355956911,1.642645  
14153887,0.100456375164316,0.198008330262216,0.531530592555733  
"Ankmy1",19.3029306246152,-0.113787908964137,0.434091764938032,-0.2621  
28697558639,0.793222222652995,0.867233761202653,-0.0162087141548128  
"Vps18",1499.55938736245,0.049999114570474,0.0665452993275579,0.751354  
567125198,0.452439297538191,0.592918982052535,0.026134412846976  
"Atm",286.315741024275,0.0935221590282924,0.51559075476879,0.181388355  
325012,0.856062758378243,0.908458449473496,0.0089787003236432  
"Sept14",1.18322765973356,-1.12939644789199,2.17646002185373,-0.518914  
400701953,0.603820435007756,NA,NA  
"Gpc1",989.890914956861,-0.40338984882132,0.310899437255327,-1.2974930  
1697846,0.194461606251699,0.324930362387148,-0.453468435208452  
"Slc38a8",2.51300348992079,1.58222769546295,1.26280140734266,1.2529505  
3225548,0.210223710012837,0.34398815734479,1.6884711975349  
"Rhov",643.438227359675,0.177162195007573,0.387814738785175,0.45682171  
7406953,0.647799194646999,0.759961344919123,0.0486288450190825  
"Foxj1",384.936548941283,-1.21461818805422,0.562589413060838,-2.158978

0395012,0.0308518706935978,0.0803673713805972,-3.06223101768055  
"Usp54",931.532740060334,0.0971462696662839,0.169509393553337,0.573102  
573431817,0.566575244906037,0.693868734701206,0.0355042880439614  
"Golgb1",5980.93701274404,0.389626321503355,0.278654789660419,1.398240  
17372237,0.162040956571457,0.284080419357564,0.490343912911111  
"Hdac11",1865.84070026027,0.489857288022944,0.237784902122363,2.060085  
74829897,0.0393903440782523,0.096802738698987,1.14385595256756  
"Plekhn1",2319.2091119107,-0.283713355121638,0.156077462982451,-1.8177  
727245191,0.0690988770987616,0.148707495107247,-0.54069354204645  
"Slc25a37",2777.51275370829,0.0130454353393385,0.157224476332901,0.082  
9733107949211,0.933872761319218,0.958753743692193,0.000549487062986958  
"Senp6",4135.04116225987,0.357290195611526,0.153579275092027,2.3264219  
4330865,0.0199960521308268,0.0574273120550488,1.02086214818652  
"Agpat1",4854.2753653216,0.193666895128576,0.136863951489149,1.4150321  
7626981,0.157059062199982,0.277737855502924,0.248102316558942  
"Arhgap27",2639.20701846476,0.190286347288384,0.182378971525314,1.0433  
5683931616,0.296783055293951,0.441124867519549,0.155735540926378  
"Flvcr2",410.922696444688,1.45627019989111,0.273410861987737,5.3263070  
431943,1.00229647612291e-07,4.57676269120482e-06,17.9041411258055  
"Exosc4",1345.52431124244,0.593429791182111,0.157868563542695,3.759011  
78717966,0.000170585801952151,0.00150009955003354,3.85861331564366  
"Ints14",1158.1103652653,-0.0952488242179724,0.101545814353531,-0.9379  
88678552171,0.348250228306649,0.493150043686763,-0.0673353755258041  
"Zdhhc14",523.431417679477,-0.430548810670452,0.160584426424663,-2.681  
13677183036,0.00733725205444152,0.0266906232383397,-1.56006905904095  
"Batf",178.065583725796,-1.35603418341715,0.45821882135262,-2.95935941  
569196,0.00308279323717796,0.0137932334412186,-5.8086770256412  
"Setd5",3462.97148073929,-0.417320224579466,0.188770210885808,-2.21073  
135756528,0.0270544457065662,0.072780934665807,-1.0935047038358  
"Jdp2",518.730522404047,-0.638130309352319,0.158006070591221,-4.038644  
25565795,5.37610269853918e-05,0.000611322731377981,-4.72209124645997  
"Thoc5",1153.28513403473,-0.199391376762923,0.130537352701799,-1.52746  
606726747,0.12664515882114,0.235667809381044,-0.288186747908645  
"Igsf9b",378.482631331458,0.0199258304105115,0.308377774645757,0.06461  
50016271467,0.948480540100063,0.968143313311226,0.000645101782740502  
"Dnajc17",494.487035184574,0.213735815869538,0.122299299119536,1.74764  
546819382,0.0805254369199426,0.167101422846428,0.382406360113614  
"Evpl",1886.36123781051,-0.19971226884095,0.247740481002863,-0.8061349  
84611745,0.420165021429551,0.563204838982084,-0.114657186569219  
"Nipsnap1",4586.4708089867,1.3658597972267,0.26905850822061,5.07644157  
495584,3.84568975734362e-07,1.30179268903969e-05,15.3648070283394  
"Nek9",4592.88804130397,-0.338781914078966,0.0991000128486487,-3.41858  
597532549,0.000629474277380355,0.00412130382311354,-1.86044991604967  
"Traf3ip1",980.359374057227,0.467172581565209,0.107608847196972,4.3413  
9565411452,1.41580512499468e-05,0.000222803618459615,3.9285569272137  
"Fhod3",1073.69378560094,0.270165132979172,0.401843589780484,0.6723141  
53690385,0.501383721111109,0.636539900652692,0.122035799263065  
"Med13",2902.0277108455,0.0186349954446415,0.123971527972137,0.1503167  
36023693,0.880514729570424,0.925363887089103,0.00144548356387823  
"Fam53c",2108.20307616081,-0.0747038221710677,0.120839901396671,-0.618

204924926608,0.536440264043023,0.668157622653313,-0.0301229097089715  
"Ccdc15",101.09637207014,0.586085706656439,0.309379591485039,1.8943903  
3080106,0.058173218911157,0.130509886357121,1.19345001537618  
"Sdr42e1",634.493740042883,-1.47830513870111,0.452561814387019,-3.2665  
2645385786,0.00108875634975453,0.00628089588939682,-7.49536576562609  
"Tmem132d",0.817848690604366,-2.64895026734815,3.06726098680135,-0.863  
620760915612,0.387796255541769,NA,NA  
"Kif4",105.536123669997,-0.749352201138462,0.505028508809953,-1.483781  
9807524,0.137866768989256,0.251344203997431,-1.03480439530468  
"Iqsec1",3187.18012590127,-0.163725560310295,0.241950604275774,-0.6766  
90024397218,0.498602647074624,0.634123958819452,-0.0745787650527434  
"Trim59",298.893673737442,-1.15138206917166,0.299359037370718,-3.84615  
77084303,0.000119984550544844,0.00114791892371118,-7.79463163689852  
"Slc26a2",1233.99698344653,-0.284701650001837,0.282221077958012,-1.008  
78946413844,0.313075614982073,0.458250006825348,-0.22216419299971  
"Exosc1",747.566346605171,-0.158454137225808,0.0982471335307369,-1.612  
81180968232,0.106785399594826,0.207030100556818,-0.249548007776677  
"Tmem132c",26.1111066476303,-0.45741377924422,0.663976986626395,-0.688  
900049937419,0.490886168012282,0.627338172897914,-0.213278109250678  
"Kctd9",1103.28831537059,0.155511246587836,0.185294026253451,0.8392674  
59033582,0.401319239529437,0.54536677811158,0.0942859592444684  
"Brip1",117.784717254822,0.38940301491191,0.255226892339252,1.52571310  
704324,0.127081328844185,0.236145521035066,0.56202811649158  
"Plcg2",1319.71471819111,-0.216461477785419,0.337832806451502,-0.64073  
5516657093,0.521694534537898,0.655074705977585,-0.0915645027731331  
"Zbed4",782.450061201857,0.295410848691386,0.170445482378197,1.7331691  
3167523,0.0830656118058653,0.171007633723024,0.52170946726962  
"Fam151b",201.006930588748,0.540481455171836,0.19086650448832,2.831725  
01440613,0.00462976456013928,0.0186858102656998,2.15111124752114  
"Ina",3.18166167395387,-0.230106166896931,1.13305324363938,-0.20308504  
3168692,0.83906856195986,0.89708607891064,-0.0249903255279537  
"Wbp2",7160.29511441266,0.397466747901727,0.207388264272348,1.91653442  
539913,0.0552971056778988,0.12547224095283,0.82501009576266  
"Cbl",3166.23448510013,-0.107874175003423,0.292024493098426,-0.3694011  
20634989,0.711828762815978,0.80874727151427,-0.0228983224211364  
"Ube2f",1937.50587663991,-0.277703446516899,0.202374032109397,-1.37222  
865810561,0.169992266652953,0.294412485406923,-0.339568410637554  
"Gtf2h5",2977.64967453969,0.414667363533128,0.231061981005108,1.794615  
28776541,0.0727150157042552,0.154578867880677,0.774205049890733  
"Smc4",3573.88319542263,0.452551511360543,0.27161775467091,1.666133761  
79643,0.0956867753418201,0.190786455221884,0.749697065376894  
"Ramp1",319.325767825006,-1.14152586528158,0.335223264702644,-3.405270  
41371712,0.000660985663139816,0.00427606610157772,-6.22670605366198  
"Mtmr3",3125.0718370801,-0.254290894940203,0.130742896475399,-1.944969  
10956881,0.0517786962604423,0.119448771851172,-0.54033450574688  
"Skint2",2.34850389571903,0.239189775284747,1.09518840144004,0.2184005  
73791908,0.827117018507786,0.88967030836677,0.0279623192081829  
"Cpne2",732.606359664649,-0.647515510478379,0.215407849917838,-3.00599  
774207559,0.00264710963404813,0.0123299913150192,-2.84629731108458  
"Csta1",0.656731174526656,1.24732419564233,3.09858403130954,0.40254651



2548565,0.687281864665994,NA,NA  
"Tkfc",10793.3571316676,1.61071968926816,0.496180145119312,3.246239707  
71914,0.00116940330056043,0.00662804209194821,8.08008806661481  
"Tulp4",3476.10265000064,-0.0647374270249396,0.137055159782445,-0.4723  
45784921201,0.636679995080614,0.751179144625548,-0.0185220973777779  
"Wdr5b",431.129445410975,-0.260171399912605,0.115082216398565,-2.26074  
373656093,0.0237751304477213,0.0657449288710353,-0.708179457856683  
"AI661453",1045.46604550037,0.490897662106799,0.225448657777948,2.1774  
2552537306,0.0294488329045711,0.0775517752530155,1.25513180497154  
"Barhl2",0.132823448656454,-0.537132324054662,4.78471990596623,-0.1122  
59930489326,0.910617311757158,NA,NA  
"Ssu2",105.098424583127,-0.471847422751982,0.357792171525581,-1.318775  
14463238,0.187244296121056,0.316039584986873,-0.543515291755998  
"Cmip",2798.55436894272,0.578713227089276,0.170236119259941,3.39947379  
912727,0.000675156481621723,0.00434175497317294,3.14789708053613  
"Fbxo15",2.92802026092371,1.40981197063801,0.820532622101709,1.7181668  
7437353,0.0857661817574956,0.175327009006883,2.45462704209282  
"Lif",359.747924612122,-1.33650114294551,0.492980350820698,-2.71106371  
830144,0.00670677366785918,0.0249320634844458,-4.93382843955517  
"Spata6",1144.06493292251,-0.085645465191998,0.107483071963966,-0.7968  
27478290823,0.425551234104173,0.56854857904366,-0.0483612979186451  
"Kcnh5",3.31172693353819,1.7248044824499,0.971186763134867,1.775976102  
55977,0.0757368560920041,0.159369438817386,3.16765562007195  
"Pja1",2988.15637060338,-0.247022430780317,0.168054438400331,-1.469895  
30970834,0.141590110077913,0.256453689391468,-0.336149897143699  
"Tbc1d10a",2218.78019447037,0.479267972248813,0.150300426248973,3.1887  
3328712259,0.00142897655333046,0.00775241648214728,2.32912285407177  
"Neurl1b",1470.78713044577,0.0182508085090934,0.236728586547698,0.0770  
959214315929,0.938547237571455,0.961881421191497,0.000709301223409429  
"Pkd1l2",16.2708365173358,-2.76806168265112,0.866132361494651,-3.19588  
760991955,0.00139401401032814,0.00759655818149191,-13.5083071092196  
"Parp14",3060.36830567037,-0.642511436818838,0.273608530286285,-2.3482  
8729991188,0.018859967593804,0.0549427234639161,-1.86422382146976  
"Gcsh",3223.23759513916,0.528638415673601,0.340503318164756,1.55252059  
957258,0.120537707658709,0.227274366495457,0.783229264335872  
"Myo15b",4019.26449063907,1.80180803462599,0.596659984354179,3.0198238  
2240072,0.00252921759766795,0.0119360135940151,7.97875750396802  
"Zfp707",1343.67770252141,0.472496864763785,0.193901250906809,2.436791  
21487912,0.0148182323806299,0.0458030905132406,1.45689858657149  
"Zxdc",915.30538821444,-0.21357080468389,0.119201828108825,-1.79167390  
359913,0.0731852171589388,0.155413875443659,-0.397596983804977  
"Cops8",2162.99036620567,-0.337205008417336,0.153462709492631,-2.19730  
910220589,0.0279983780316143,0.0745781932869421,-0.875352885518845  
"Tmem30b",1427.5372395838,-0.25667717602964,0.360344324104462,-0.71231  
0861750192,0.476272299486811,0.613852280234918,-0.125258709779989  
"Gm9761",1.74738065009195,1.14921316180068,1.33668726731064,0.85974721  
9791251,0.389928399325143,0.534131230156079,0.720687341955143  
"Gbp8",635.073222886199,-1.10207370207918,0.544882269844312,-2.0225904  
9903399,0.0431153845604467,0.103901096052353,-2.49544293145509  
"Trmt5",378.22305424334,-0.383924740392381,0.19812718552887,-1.9377691

1213649,0.0526513977528526,0.120946860672139,-0.811004156477142  
"Cyb561a3",1622.81516108459,-0.401107364887131,0.130358076755273,-3.07  
69659607678,0.00209119179437728,0.0103225462295616,-1.83443437873759  
"Dhrs11",807.478211884298,0.720566611993751,0.208531128731375,3.455439  
08181674,0.000549397325548808,0.00372247008705943,4.03039410628625  
"Gu1o",8.68156720836084,1.20362232970276,0.78833915447485,1.5267823789  
6803,0.126815134708522,0.235865487773106,1.73862475630058  
"Slc24a1",3.6238312231445,-2.59424109794246,1.37808811614976,-1.882492  
9026966,0.0597691226185664,0.133170877935871,-5.23030701496233  
"Polr3b",1019.52489577913,-0.256535198366287,0.108833003249157,-2.3571  
4526575168,0.018416041120174,0.0539168186105461,-0.749163027582318  
"Uroc1",1774.47269663904,2.45246919224102,1.02523604114767,2.392102007  
54909,0.0167521857030941,0.0501896307373893,7.337657431865  
"Eda2r",69.0174915716146,-1.43271773382906,0.28383558916734,-5.0477029  
2559886,4.47153722109757e-07,1.4506827410476e-05,-15.9617523405496  
"Ifit1",1407.60046438679,-0.272058066477385,0.310390758191588,-0.87650  
1826479826,0.380757283889166,0.525630524020883,-0.174975978820733  
"Six4",320.323360348006,-0.336963233438988,0.290744620682792,-1.158966  
35558606,0.246469899285121,0.385625910468728,-0.321088060956273  
"Pkd2",8420.88569045214,0.474292081579892,0.202475293851357,2.34246891  
34077,0.019156629768879,0.0555992806242338,1.37050729224617  
"Scara3",327.915093337702,-1.17306942534243,0.270513069239282,-4.33646  
118703713,1.44794980481233e-05,0.000225341695695181,-9.8513111169938  
"Dynlrb2",22.6970282013154,0.946202539531497,0.524898445841955,1.80263  
924770011,0.0714448889822653,0.152393878719638,1.78007835003491  
"Caskin2",3170.77664012612,0.348245245464497,0.17286584639978,2.014540  
48163525,0.0439528191523787,0.105411078454253,0.783512638538794  
"Rasd2",165.627496940132,-0.0211928245350368,0.213598439610079,-0.0992  
180681362842,0.920965129344194,0.951413483731752,-0.00105554089349147  
"Sec22a",1078.98651836533,0.10271287149234,0.154729510910358,0.6638221  
1698353,0.506804168376183,0.641412370501258,0.0456130098302077  
"Diaph2",910.469236349393,-0.0449254164789995,0.16490061105315,-0.2724  
39357210868,0.785284214064042,0.861162632498352,-0.00671508756033068  
"Snx2",3954.7131374237,-0.190738117966027,0.105212274477331,-1.8128884  
5729804,0.0698490268831932,0.149825778456381,-0.362074762157105  
"Uaca",2981.94094886747,-0.194872427338532,0.159374492247162,-1.222732  
85135439,0.221430614741946,0.357259460231522,-0.200580821809529  
"Gbx2",8.30819218050911,-2.82060352656092,1.12615666358746,-2.50462801  
292288,0.0122580237888961,0.0395903508093251,-9.10820788607945  
"Poglut3",994.949380945631,-0.657163574289192,0.157857265172289,-4.163  
02394173589,3.14060422716466e-05,0.000404545737646677,-5.1342519258954  
5  
"Edil3",70.034395301243,-0.595058731665088,0.367809168414164,-1.617846  
38004193,0.105695708238982,0.205489572165088,-0.941597128720041  
"4930556J24Rik",3.45859733140394,2.82363061589696,0.93525617235541,3.0  
1909861635636,0.0025352799118849,0.0119562114133015,12.498813210006  
"Pcnx4",472.3028115623,-0.346790951430919,0.131727976740889,-2.6326294  
5359786,0.00847267278378165,0.0297365367523305,-1.21910155715252  
"Mad2l1bp",553.122039154944,0.141882986305261,0.214602361891268,0.6611  
43638191403,0.508520202208313,0.642920950762397,0.0626744681967893

"Hmgxb4",1054.3759945081,-0.249209945414097,0.137332049999284,-1.81465  
24821802,0.0695773317434927,0.149374456544222,-0.473822618635387  
"Gjc1",531.169287614669,-0.721987230210212,0.142694734618322,-5.059662  
72786009,4.19998710693439e-07,1.37864223250853e-05,-8.0803556999393  
"Zfp395",1597.49863252734,-0.830421490515704,0.227290544971187,-3.6535  
6812629832,0.000258621128193489,0.0020593263236369,-5.13646947041096  
"Ice1",2218.99749595668,-0.0315953616123886,0.130898802206319,-0.24137  
2427247951,0.809266480933854,0.87822551595972,-0.00410271667613573  
"Hsd17b13",6.60647303333655,1.74116461822744,0.699529777262957,2.48905  
003735521,0.0128084937485859,0.0408940578205219,5.56610370817457  
"Fbxo16",85.5982667383877,0.105490782039023,0.35910298336991,0.2937619  
20463794,0.768939834907463,0.850514442726844,0.0170804224398324  
"Scn10a",2.91274089055543,-0.176775286229507,4.77347756374775,-0.03703  
28097008415,0.97045884531684,0.981941181421263,-0.0032215296836522  
"Zfp418",113.269425308559,-0.0450364927151777,0.191559643936193,-0.235  
104282873793,0.814127794604797,0.881747956198947,-0.00566779882194409  
"Morc2a",2649.36172006093,0.206052744021703,0.222762573764919,0.924988  
163582411,0.35497206440331,0.500105511374454,0.142781401336001  
"Rsrc1",1620.99332184586,0.393588860768637,0.229478356299939,1.7151458  
9486687,0.0863184816675219,0.17619741996999,0.683329382572347  
"Hdx",71.7838410206572,-0.787355647843612,0.277752536922465,-2.8347379  
1659157,0.00458632936279453,0.0185758724378412,-3.13831435829445  
"Zswim2",0.0860324900549444,0.00784021510142923,4.78471990596623,0.001  
63859437031058,0.998692591435574,NA,NA  
"Tex16",0.133378345269972,0,4.78471990595892,0,1,NA,NA  
"Zfyve9",1295.55169697833,-0.237843259657592,0.20632884255024,-1.15273  
87868697,0.249017616146252,0.388570747549445,-0.224828481573991  
"Washc4",2232.57371880585,0.30490444352452,0.188641361841787,1.6163180  
7864196,0.106025560063781,0.205877461884435,0.481893585845649  
"Ccp1",5175.1209865579,0.436920136136987,0.135487879473812,3.22479130  
852023,0.0012606452826392,0.00702488188651019,2.16637974659899  
"Atp5h",15769.6678755225,0.684369072910546,0.280888886059237,2.4364405  
5310262,0.0148326072622106,0.0458329915053221,2.10973951823195  
"Inpp5j",1523.59158322051,1.72371700609785,0.556570467174521,3.0970328  
2469954,0.00195468228206729,0.00981772157025967,7.96971969268599  
"Pttn13",3543.85670471283,-0.134044779546146,0.249181613748396,-0.5379  
4008927759,0.590618410412971,0.713853072541044,-0.0451835620939688  
"Daam1",1460.7454209829,-0.222578669932127,0.148292360008497,-1.500944  
95710617,0.1333697988253,0.244816827103718,-0.313222718707652  
"Tent4a",1109.18954119296,0.0359778965715185,0.150608500457233,0.23888  
3572057971,0.811195864425916,0.879780674411865,0.00460814383768967  
"Pla2g3",47.9829388053842,-0.127582672773385,0.326273404020837,-0.3910  
29949732701,0.69577509814359,0.797323799710386,-0.028896762136855  
"Exp5",168.177358173121,1.03242220233864,0.376947267708556,2.73890353  
049828,0.00616444586111936,0.0233564790427002,3.878687209644  
"Hid1",516.824573732609,-1.12691685314295,0.265811094437982,-4.2395403  
2289604,2.23977960151387e-05,0.000313730047918947,-9.09081308104459  
"Slc41a2",920.452627391753,0.654536389870351,0.319972143517926,2.04560  
429128007,0.0407953189243446,0.0994159640528522,1.51095966864932  
"Myo5a",3202.25305560506,0.230910364929348,0.188774733325764,1.2232058

8598513,0.221251943011415,0.357116753711637,0.237766673124367  
"Ppp1r18",1806.88512928259,-1.10905558502994,0.261156828746166,-4.2467  
0337112992,2.1693886600978e-05,0.000305847723026659,-8.97494716528656  
"2700049A03Rik",297.493841652581,-0.00887267656154214,0.17152122620540  
8,-0.0517293209583083,0.958744373763993,0.974843439698078,-0.000226061  
562990422  
"Mon2",3116.96227104359,0.0679527959249044,0.139335080645733,0.4876933  
7635565,0.62576704409966,0.742584829454945,0.0202239865253969  
"Pof1b",197.142269569201,-1.89607052969594,0.535277399151489,-3.542220  
41263381,0.000396773786792671,0.00287487747858919,-11.0953216623133  
"Tut4",962.392614924971,-0.397755835001608,0.184329505697403,-2.157852  
23042136,0.0309393225239392,0.0805387268155652,-1.00195376263631  
"Chst11",1346.91840638982,0.193640069474559,0.251292597637,0.770576098  
521924,0.440958232889314,0.582625440460517,0.104606450703811  
"Ppm1h",3388.78666779016,0.0514862264787013,0.17138584164607,0.3004112  
00739824,0.76386352107259,0.846961099452566,0.00855188862187484  
"Pik3ip1",1166.11308121497,0.096236916753596,0.208803350226224,0.46089  
7378558964,0.644872232609107,0.757726816404264,0.0266992348206797  
"Ssh3",2905.54346522693,-0.234703448890999,0.151422007152009,-1.549995  
62682712,0.12114256564789,0.228217331031619,-0.346764229492369  
"Mtrr",549.526694130737,-0.222613916882501,0.144088623107643,-1.544979  
13909688,0.122351309332528,0.229943820486864,-0.327224706282512  
"Rxylt1",1054.99056036835,-0.201425478165733,0.22054306360491,-0.91331  
5861643124,0.361076442502755,0.506106294483983,-0.137172475559244  
"Gpatch8",2185.00245156396,-0.122059414068461,0.174514945023069,-0.699  
420981121851,0.484288979561231,0.621828113343429,-0.057989398606958  
"Prss55",0.244662202050615,-0.54897222239719,4.08143125059311,-0.1345  
0483140196,0.893003390900573,NA,NA  
"Ly6d",2799.3148991997,-3.35865293341196,0.929228258147837,-3.61445414  
941052,0.000300981073189065,0.00231471540289721,-20.3818796467812  
"Zyg11b",1487.58111653667,-0.086515836688645,0.159145712949727,-0.5436  
26561376334,0.586698477931174,0.710171773199778,-0.0296099070381338  
"Setmar",222.736354615479,0.559323888119525,0.139322998392226,4.014584  
05700472,5.95507186347321e-05,0.000662361615482035,4.09408245096927  
"Tiparp",1208.67705584694,-0.151207383681285,0.232763191810893,-0.6496  
1896468636,0.515938379836609,0.649579326590757,-0.0652354492430992  
"Cd300ld",304.972476184369,-1.23631805992546,0.450690532507066,-2.7431  
6403552603,0.00608502798705617,0.0230963355444075,-4.65854697294063  
"Zyg11a",3.85258019680537,-1.66535498600608,1.21599514280853,-1.369540  
820829,0.170830283823707,0.295497593505556,-2.03022524716543  
"Ankrd12",6766.1787389136,0.551114697538965,0.269620979576412,2.044034  
92044571,0.0409500974826221,0.0997183715144455,1.27054277274383  
"Lrrn1",304.854190995015,-0.499387243841412,0.334062415759595,-1.49489  
203299299,0.134942621861486,0.247052698690635,-0.698220077808914  
"Cd300a",497.895860150125,-0.851765369445201,0.285215063366756,-2.9863  
9685923573,0.00282286043643299,0.0129111266219963,-3.70489470607932  
"Ythdc2",577.685644080139,0.0350469005891299,0.293979655663633,0.11921  
5394378276,0.905104710677152,0.942116786717014,0.00208970771008509  
"Cacna1a",362.977702476113,-0.516348806171789,0.376455059674408,-1.371  
60809212758,0.170185473348447,0.294617451775549,-0.631018277704299

"Tmem109",3990.17184869017,-0.878899895235408,0.308388555555774,-2.849  
97571862375,0.00437225668184288,0.0179285511635273,-3.53437358563695  
"Bmp2k",1464.35398774195,-0.0618376321722633,0.162929316425988,-0.3795  
36559341998,0.704289461029132,0.80365361648451,-0.0135168980453346  
"Itga2b",417.304304187959,0.96687382990619,0.284219940706856,3.4018507  
9027732,0.000669311696348966,0.00431412874559079,5.26545940684084  
"Xpot",3208.55752799315,0.784526583561059,0.176493270213955,4.44507930  
874652,8.78594495154247e-06,0.000154471014125496,6.88461624280543  
"Pbx2",3314.42554326107,-0.199867125847331,0.104613221922031,-1.910534  
0814022,0.056064482558272,0.126921213516434,-0.412563472877254  
"Tdg",1538.88808279538,-0.156996547724336,0.120035342974273,-1.3079193  
497034,0.190900665723186,0.320762853571702,-0.178513427418496  
"Dbn1",1993.69457712371,-0.352700945109358,0.273106167995525,-1.291442  
61990867,0.196550239936124,0.327494152988767,-0.393714801858285  
"Gpr142",1.69825305527279,-0.295773614968764,1.70254791809545,-0.17372  
4105985593,0.862082291750818,0.912858294041004,-0.0269670468292057  
"Rnps1",2856.46545585665,-0.286200247951864,0.0964590740624638,-2.9670  
6401894891,0.00300658349492934,0.0135543040425739,-1.23096190288634  
"Ppp1r1c",2.23344122092813,-1.59597358793335,1.25767946687039,-1.26898  
278136382,0.204447205324836,0.336966323704451,-1.73605583380636  
"Sema3f",1854.5369185412,-0.814543091669183,0.25949577848591,-3.138945  
44420657,0.0016955701217894,0.00884909695788267,-3.85070348236091  
"Fam171a2",907.744671895598,0.146667886259376,0.362254651918794,0.4048  
75094032621,0.685569326583334,0.788813332333403,0.0347933734746171  
"Prr7",86.3253292695463,-0.998805907681232,0.303700162223622,-3.288789  
5099173,0.00100619242596444,0.00589859889400323,-5.12691110771332  
"Fras1",1537.95761698818,0.836457963731368,0.376984146004798,2.2188146  
9710592,0.0264993337185397,0.071711867986688,2.2041495623793  
"Neurod1",0.414174839119458,1.45961045624537,3.12076350495903,0.467709  
409548653,0.63999241120397,NA,NA  
"Dnaic2",34.9755848837743,-1.43126867888672,0.477427082809401,-2.99787  
911164251,0.00271865489312887,0.0125761169884287,-6.26316839203529  
"Gns",9728.07188421827,0.119984779297687,0.0912763845567695,1.31452160  
249689,0.188670733239954,0.317841883248024,0.137526703093926  
"Grn",12131.2510764245,-0.138341147321824,0.198040382171771,-0.6985501  
93676322,0.484833179175523,0.622294603881532,-0.0656209692862518  
"Ppp1r21",2453.08087122288,0.744734764527662,0.207649625722851,3.58649  
702321956,0.000335149888491024,0.00252404500803321,4.4549233042317  
"Ttyh2",1826.93769114422,0.481417444179205,0.152378275849704,3.1593574  
7070694,0.00158117418800802,0.00837189478915665,2.3025594782919  
"Tmx4",1455.65842768476,0.030518127568391,0.123979407882166,0.24615480  
9816452,0.805562395922428,0.876400825560512,0.00402630934420243  
"Cnot6l",2753.57055583488,-0.12892232955813,0.133561632835398,-0.9652  
63977527869,0.334412609559209,0.479106759883857,-0.0948650820422128  
"Mrps10",1429.64851293683,0.307817466116242,0.207639439089144,1.482461  
46043618,0.13821755094872,0.251724809303021,0.424609204266796  
"Adgrb1",38.9446082891433,-3.23625185854965,0.597984907460179,-5.41192  
899381856,6.23494139391797e-08,3.19918124470033e-06,-40.9470508867031  
"Dgkh",2448.6969976305,0.926777578387367,0.250620141019119,3.697937343  
01931,0.000217358521556035,0.0018072735408527,5.85346777900603

"Pabpc5",0.267502283911741,-2.05091740934146,4.74801900672581,-0.43195  
2232380754,0.665776131051136,NA,NA  
"Nostrin",487.175297117415,-1.05012690681159,0.246535627189683,-4.2595  
3408350032,2.04853461523538e-05,0.000293477795208371,-8.54142622858362  
"Mfrp",58.1608323699372,-0.241765245961803,0.482047009104819,-0.501538  
732520653,0.615992025829185,0.734998624295786,-0.0744362920228053  
"Nagk",2794.55516300379,0.154266677637221,0.18242229475866,0.845656929  
386356,0.397744157013222,0.542209017230218,0.0944272059018794  
"Sirt6",541.33536902405,-0.533099852200555,0.163461365788112,-3.261320  
18798613,0.00110894741075123,0.00637260731353596,-2.69521775549758  
"Mast4",1256.87257262551,-0.126142157483357,0.222761159480431,-0.56626  
6389426109,0.571212704940285,0.697652795512507,-0.0454154311675566  
"Pcdh11x",6.24349355313225,-0.850973325175422,1.07551018795878,-0.7912  
27581758657,0.428811198997772,0.571455181331321,-0.476178481247222  
"Tmub2",2433.08233338844,0.171068089083236,0.0812815146324194,2.104637  
07347063,0.0353229118993257,0.089040224461933,0.413756750561429  
"Tle6",158.083600697444,-0.661904989871099,0.382998529909926,-1.728218  
09531949,0.0839491307130258,0.172553252228819,-1.16299975311677  
"Map4k5",1651.51351001369,-0.466203387892215,0.156129813827787,-2.9859  
9848717198,0.00282654041463992,0.0129249261267939,-2.02733092164044  
"Glis1",507.142613621856,1.69079972412415,0.612494830579048,2.76051264  
387926,0.00577107240509559,0.0221373932234023,6.44277053614096  
"Dusp5",317.86945001827,-1.1397940374895,0.301589174721935,-3.77929359  
878514,0.000157273896796968,0.00141054574045413,-7.48135571112168  
"Asb16",16.6311626917754,-1.86067403605594,0.617426638355952,-3.013595  
33338315,0.00258171913499345,0.0121238823926065,-8.21036935428055  
"Tle2",1903.65229545565,0.763833719207978,0.252371137894566,3.02662866  
118664,0.00247297552379679,0.0117323558436366,3.39555007970476  
"BC030867",42.5040111271224,-1.02991590371342,0.670046845212313,-1.537  
08044605013,0.124273610742011,0.232653563345917,-1.50182829839798  
"Dsg1c",0.278375941021959,-0.931779969723793,4.78266383184478,-0.19482  
447491284,0.845530361204747,NA,NA  
"Vax2",0.844790771797237,-2.3693293040558,2.31499597775028,-1.02347016  
013321,0.30608560157046,NA,NA  
"B3galt1",128.602214318292,-1.69686786088923,0.506356016765198,-3.3511  
3596897592,0.000804807756555181,0.00498321423858778,-8.99625068360451  
"Gna11",4599.61350497924,0.022009988599311,0.143080459758479,0.1538294  
51180574,0.877744211533575,0.923746782343696,0.00174577264819352  
"Cd207",8.16789495702596,-0.202084765850843,0.616920568857388,-0.32757  
0154169327,0.743236691400526,0.832756522751837,-0.0369843351038934  
"Dio1",688.786754374156,2.41326721416594,0.801999851132905,3.009061922  
83821,0.00262055698620965,0.012249915808011,10.6237723262643  
"Gpsm3",1349.1519926669,-0.704483810706506,0.371192250965066,-1.897894  
71325145,0.0577099529420954,0.129829083011997,-1.43822937068322  
"Rab24",4059.86642977066,0.482633388615446,0.153271950743474,3.1488696  
1557117,0.00163903305688606,0.00861686641511838,2.2944554354042  
"Gna15",207.663220551987,-1.41394066359054,0.275175008687027,-5.138332  
40284805,2.77187252008223e-07,1.00159668737618e-05,-16.2763376510417  
"G6pc3",2697.46057634463,0.532102132552859,0.105325319336234,5.0519868  
9077041,4.37237716648288e-07,1.42087683320139e-05,5.93913845728232

"Ccdc122",228.302496166248,-0.769459097684288,0.352692671417039,-2.1816702189835,0.0291338803777691,0.0768989305003035,-1.9738651920165  
"Cpne7",891.589884392787,-0.125161792967942,0.368920924266271,-0.339264554367227,0.734410442351192,0.826236908055152,-0.0238900986475365  
"Unc13a",84.2794921100854,0.337196924458418,0.342581324224812,0.984282856695187,0.324976456187731,0.469884385817454,0.254674249788491  
"Zfp661",344.46219395436,0.186088918639725,0.167060421000416,1.1139018896598,0.265321278667617,0.407180975321621,0.167200434792857  
"Sos2",3412.43329829777,0.701447603641693,0.220338009314235,3.18350703913878,0.00145502575475232,0.00785657495601239,3.3994988394577  
"Colgalt1",3812.29067682973,-0.704729811023381,0.148214729705528,-4.75478930079038,1.98653486609948e-06,4.74093718717351e-05,-7.01677670609397  
"Scn7a",1525.13316954954,-1.47052906394797,0.290831514617044,-5.05629201114711,4.27486613087402e-07,1.39851241308359e-05,-16.4368626632982  
"Grip1",236.765080631497,0.935500147983202,0.368606288827341,2.53793865253721,0.0111507529127841,0.0369255061639715,3.08607722903149  
"Celf5",23.2029306418701,-1.13942119256663,0.432176328210684,-2.63647293521169,0.00837728827236609,0.0294891436603347,-4.01501616525843  
"Cpsf7",4475.26780006267,-0.07202723760682,0.158086155690359,-0.455620147711724,0.648663152417099,0.760485487693379,-0.0197209316127421  
"Nrip3",67.4464784173874,0.186139535863147,0.57973958069978,0.321074396263346,0.748154012740077,0.836199881937863,0.0332980550680782  
"Nup54",941.431029050656,-0.189792638404296,0.136490221071614,-1.39052187705605,0.164370460805585,0.287012776889152,-0.236904588969839  
"Nxn1",31.3362484450759,-1.37690959479205,0.801483234259162,-1.71795183721438,0.0858054005299994,0.175370408756177,-2.39699984315275  
"Tet3",2754.9672774544,-0.342357844231205,0.116585741867935,-2.93653270756744,0.00331903817728268,0.0145885045943773,-1.44732511874665  
"Tesp1",119.399525730186,-0.930379299472722,0.570792839949067,-1.62997717272652,0.103106321606463,0.201945460440263,-1.48838136996755  
"Gnat1",9.11170833582668,0.606819949759685,0.697825978111433,0.869586356475231,0.384526496459418,0.529185321002664,0.386190280267154  
"Larp6",167.878154901528,-1.07122253769983,0.322958260905,-3.3169070662507,0.00091019887060078,0.00548256335464134,-5.5769800528863  
"Art3",681.644077709838,-2.08728764360622,0.601014315581513,-3.47294164130958,0.000514787278050449,0.00354050170985102,-11.7795803394952  
"Plvap",6043.8060496418,-0.077938254271533,0.291605675215597,-0.267272762143294,0.789259156819714,0.864112248844448,-0.0113830847516221  
"Ttc21b",599.167857587346,-0.0415081148041724,0.132225790956458,-0.313918445894122,0.753582980248908,0.839812582812826,-0.00724634255545459  
"Tmem127",4710.22322203844,0.098641135383071,0.109200906607784,0.903299601141222,0.366366908176435,0.511266960751798,0.0661747271779498  
"Acot11",1863.74849787918,-0.905608633055427,0.514538574709259,-1.76004031100514,0.078400971976745,0.163685849834305,-1.63897615325465  
"Mfsd12",1638.35953721453,-1.10566134864082,0.220526305595206,-5.01373904422246,5.33823743820989e-07,1.65998066661989e-05,-12.1690409399371  
"Cycl10",1197.7433242624,-0.903972487268238,0.5524225852955,-1.63637858286458,0.101760378712319,0.199933265267303,-1.45518927495286  
"Fam214a",2323.61827896334,0.187310275192227,0.268277428036784,0.69819

6179093175,0.485054515682303,0.622441990314558,0.088804708656367  
"Ano8",2220.93665686277,-0.15982158532267,0.196870615577596,-0.8118102  
58497807,0.416900514754278,0.560254065523393,-0.0925950183491857  
"Ankrd27",1877.25448204876,-0.337763900969915,0.150525519901997,-2.243  
89791970041,0.0248389700370466,0.0680784703095776,-0.90760344087668  
"Myl12b",9046.48060092248,-0.170924539092071,0.162636916346619,-1.0509  
5782022692,0.293277962659845,0.437340877750839,-0.141361832028773  
"Fam151a",3993.02612958012,2.16720826669812,1.02805014486057,2.1080764  
1780163,0.0350243799075992,0.0884330660935182,5.25658386756257  
"Gipc3",73.8132645438754,-0.876331545756194,0.348445607113512,-2.51497  
372291657,0.0119041255890206,0.0387878744543323,-2.8477687003164  
"Nudt19",23789.790317039,2.23876929538382,0.550063049651816,4.07002305  
790389,4.70084849072854e-05,0.000551819047996538,16.7958973411475  
"Mrpl34",2378.09073058824,0.383897739921432,0.343879770049324,1.116371  
98043481,0.264262942080309,0.406196203758917,0.34586075859408  
"Tbxa2r",305.772157758631,0.0518840945048665,0.284133224309475,0.18260  
481374876,0.855108107029431,0.907813234828479,0.0050180537361552  
"Lrr1",15.7545957979128,-0.982480002329637,0.75672298235056,-1.2983350  
9123487,0.194172213021172,0.32458588901636,-1.10549150608773  
"Cactin",1513.43561065833,-0.180023656136261,0.106473709184269,-1.6907  
8035803846,0.0908787599595858,0.183394127684952,-0.305341316583261  
"Sncb",0.529844454077075,-1.26306284411672,3.72862186598923,-0.3387479  
04591184,0.734799649319712,NA,NA  
"Rps29",10207.6780652788,-0.0229183315959395,0.174877334815435,-0.1310  
53756166443,0.895732782793072,0.935808701650288,-0.00152049842024957  
"Cog3",2207.644778275,0.0778384242251705,0.132404289299153,0.587884460  
822134,0.556609847276013,0.686059725784671,0.029328785883438  
"Filip1",204.808840563418,-1.01651849151608,0.328487978882519,-3.09453  
787311843,0.00197119766114448,0.00988539403214896,-4.69295783112181  
"Pip5k1c",3709.49038299962,-0.156855276763982,0.1823103372456,-0.86037  
5111657402,0.389582300622313,0.533732131642346,-0.0984833410430888  
"Cobll1",3693.17109347781,1.07551407170329,0.232419605323885,4.6274670  
7707608,3.70165053400138e-06,7.87922476044029e-05,10.1622054498087  
"Ncaph",190.069201625048,-0.89007833388959,0.239667742944947,-3.713801  
12714645,0.000204169261959085,0.00172258427939344,-5.6643958800522  
"Sidt2",5964.10385144058,-0.0414208196924186,0.111375387453232,-0.3719  
02811200648,0.709965211993624,0.807542976516841,-0.00885407314611394  
"Pygo1",319.204445000913,-1.15000111024605,0.279029900196499,-4.121426  
08887504,3.76534277062725e-05,0.000465546311615029,-8.82315234318572  
"Ushbp1",2982.81161835968,-0.34644361713463,0.341091421124229,-1.01569  
138265853,0.309776372872913,0.454957797399522,-0.272841884534401  
"Mdga2",501.088036394291,0.649502738538694,0.353644798442648,1.8365963  
2885574,0.0662695096861043,0.143856924945409,1.25934427439052  
"Tjp3",1362.71557696424,-0.189994009839616,0.212375415330979,-0.894613  
953048743,0.370993490422095,0.516098107609161,-0.125673133862153  
"Cdhr2",867.396098467745,2.08969390787465,0.653408250886427,3.19814435  
315092,0.00138315024449864,0.0075542474698136,10.2095032092614  
"Ttc22",345.380432369702,0.190913282748449,0.218342785312975,0.8743741  
29077781,0.381914541572143,0.526743278741858,0.122383429973205  
"Ly6g6f",1.34458572026801,1.14648378212331,1.68489676825845,0.68044749



3117542,0.496221157728173,0.632001674114596,0.526079258198671  
"Dhcr24",7519.6579066999,0.509547102560708,0.369346098981805,1.3795924  
8511194,0.167712152551865,0.291344578622262,0.628398247478425  
"Rnf44",4843.53980126959,-0.188758332149547,0.149612582636805,-1.26164  
744183163,0.207075676904524,0.340148403393801,-0.203551941018418  
"Rtkn",2414.1567077561,0.747451279204736,0.357561597478624,2.090412629  
53139,0.0365807493597757,0.0915712497827386,1.78688537408721  
"Dhx8",1155.71224696199,-0.0317094460259342,0.11339840701244,-0.279628  
672583167,0.779762406759557,0.857497366018682,-0.00487492054645977  
"Mrpl54",1898.00277456732,1.02453001272139,0.19185817077351,5.34003847  
003654,9.29268602682445e-08,4.30377178505993e-06,12.6591120578069  
"Arl4d",1329.61487627844,0.695388409261962,0.314097626717967,2.2139244  
3021024,0.0268339778540871,0.0723063709506621,1.82667619979075  
"Synrg",2389.82951503363,0.215183464995848,0.131131382125072,1.6409761  
0738677,0.100802374953901,0.198549823906573,0.347890380433997  
"Tmem106a",3455.76628852272,1.16141927932062,0.223882171967821,5.18763  
628703564,2.12980050931397e-07,8.11071295519607e-06,13.6145340015183  
"Zfr2",471.685960650751,-0.821111626837147,0.224184919096221,-3.662653  
26921801,0.00024961630806976,0.00200784602918489,-5.09967203495196  
"Cog7",1425.78513003123,0.247580216033251,0.171135371916442,1.44669224  
871953,0.147983136374751,0.265175553077373,0.328628869762931  
"Cebpa",6627.7797402165,-2.13502031514261,0.609882336052355,-3.5007085  
6119915,0.000464022992197335,0.00325801955414607,-12.226483699826  
"Atcay",11.2585745369611,-1.37378186586203,0.955935716670551,-1.437106  
95385126,0.150687605639365,0.269057411607724,-1.80354272849473  
"Rubcnl",169.32150934795,-0.840672144106536,0.39029926820944,-2.153916  
78278889,0.0312466985717772,0.0811249172772986,-2.11157097199315  
"Lbx2",28.086646590784,-0.5228042366215,0.373296388319385,-1.400507084  
93381,0.16136152327756,0.283112299187065,-0.659732753272707  
"Dop1a",1137.66174990643,0.173121464680661,0.14969146129712,1.15652197  
647423,0.247467715776243,0.386814616178065,0.164432451398159  
"Dapk3",1646.65737115983,0.14875601303602,0.132321430716225,1.12420196  
963438,0.260927354078262,0.40240145138163,0.135413350388825  
"Parm1",1920.19343391228,-2.35005806472887,0.540425243311249,-4.348534  
96170865,1.37049973027095e-05,0.000217520471741762,-19.8185510064411  
"Hrh2",82.9140911551608,-1.70615230797802,0.428963124994997,-3.9773868  
8610569,6.96767492450817e-05,0.000748929027993717,-12.27895010702  
"Otoa",28.3548869747214,1.08970693281354,0.593048300815632,1.837467422  
66159,0.0661409214493233,0.143641756117053,2.11450316622026  
"Vat1",4916.48687460233,-0.879863083748296,0.192358041986892,-4.574090  
4547586,4.78293184351395e-06,9.58454317418653e-05,-8.14117404498842  
"Eef2",52614.175982765,-0.192849843089319,0.247045469469484,-0.7806248  
92670377,0.435023146709162,0.577061585576321,-0.106030055612159  
"Htr2a",31.3015779227501,-0.37595520212071,0.480402594391226,-0.782583  
621550017,0.433871662519645,0.575955179453161,-0.207424047341551  
"Foxn2",892.11495224165,-0.569210370599293,0.126797067899582,-4.489144  
58376973,7.15097508297843e-06,0.00013055216495123,-5.09086823917405  
"Dpp4",3333.47636294212,-0.0180913489701454,0.400523757103354,-0.04516  
92281651024,0.96397242157294,0.978290286807541,-0.00039708405540127  
"Igsf6",354.020044292342,-0.997729921130417,0.426466240058919,-2.33952

849583726,0.0193080985706545,0.0559472887398753,-2.87679988277598  
"Rundc1",1617.03982977334,0.304232918752872,0.109021317631846,2.790581  
92802471,0.00526133827649215,0.0206950925388428,1.17977226540778  
"Zbtb7a",5151.68524701654,0.228487387005191,0.189450425521462,1.206053  
70178652,0.227796784823183,0.364237436612871,0.230760682416858  
"Ep gn",3.68903256368484,-0.210874635572842,0.84951964892137,-0.2482280  
84942577,0.803957937582293,0.87519244413933,-0.0281120098992596  
"Baz1a",2261.82242768582,0.00556731883737368,0.276486295583273,0.02013  
59666873503,0.983934908688359,0.989723009277618,5.75113144596816e-05  
"Ncapd3",974.179475717459,0.270690511628721,0.177179724717273,1.527773  
63245521,0.126568751042381,0.23557948911278,0.391339137472842  
"Map2k2",5447.58189295781,0.657531432280989,0.170548505821289,3.855392  
51202815,0.000115544090720117,0.00111363256592232,4.47129791996431  
"C8a",600.80236769364,2.52258626890448,0.812491472452723,3.10475414749  
816,0.00190437243531349,0.00961456596161118,11.7160914917182  
"Nek11",32.3815912475547,0.269374549711914,0.43580048097807,0.61811439  
2869313,0.536499935391336,0.668157622653313,0.108620215178354  
"Tbr1",2.93680645582274,1.65556542627188,1.21314377292276,1.3646902067  
3717,0.172350438969238,0.297660520728266,2.00621688881043  
"Creb3l3",19.3360886700843,0.882300299044002,0.471996716822747,1.86929  
329717211,0.0615820201605586,0.13622943375205,1.75879047572147  
"Ccl5",697.097497144646,-1.18839643334067,0.562158269445221,-2.1139890  
63104,0.0345162014529968,0.0875044722312485,-2.89501140387897  
"Zc3h12b",136.649821362598,-0.185460305590208,0.243791624650803,-0.760  
73288348545,0.446816629593506,0.587935662290065,-0.0985049703424338  
"Kri1",2050.6920076501,0.171040991824436,0.208988663838499,0.818422342  
546828,0.413116068274128,0.556664623304004,0.10019450163221  
"Anapc13",5226.76070085978,0.816628869129687,0.243591689483156,3.35244  
962938753,0.000800998154920181,0.00496751336661377,4.33208213599776  
"Rrp12",638.831549382876,-0.184683367438229,0.0814861159151021,-2.2664  
3969177087,0.0234244757095272,0.0650150074568486,-0.504764972862107  
"Dhx57",1651.84514587404,0.10819887306518,0.303792528044002,0.35616041  
5668645,0.721720434463115,0.816247391598714,0.0219684604991163  
"Zc4h2",248.71436124578,-0.585732994385376,0.255618540626359,-2.291433  
91926938,0.0219383296762331,0.0619125129580536,-1.6295285030346  
"Eef2k",1107.21315954396,-1.41265248106784,0.318359978173179,-4.437280  
36788405,9.11026000055982e-06,0.000159025827655251,-12.3556857194393  
"Xkr6",400.590194139547,0.295676551772919,0.186192043042563,1.58801926  
731814,0.112281982350131,0.215225530069096,0.454179533042286  
"Oma1",733.780188344795,0.0216928219375452,0.142646572385068,0.1520739  
09487193,0.87912864205633,0.924555139904302,0.00170164107182382  
"Mtmr9",852.522755285429,-0.414711234246416,0.191299529548763,-2.16786  
332525039,0.0301690869853547,0.0790088724422334,-1.05261803239423  
"1700020L24Rik",10.5623705415211,-3.23863183209893,0.977593177367743,-  
3.3128625557916,0.000923463494026545,0.00553000344180884,-16.833005420  
9172  
"Becn1",6203.32649701323,0.180083187123645,0.0922404906454789,1.952322  
51978998,0.0508999254240182,0.118007936494353,0.384838382869199  
"Secisbp2l",4449.42077555134,0.215330184953944,0.129739866979419,1.659  
70715067947,0.0969733801539782,0.192721125903809,0.354543535066086

"Fam167a",138.871465201344,-1.35756780587885,0.431054373710065,-3.1494  
1197370144,0.00163599386569452,0.00860856703294952,-6.45523139399129  
"Eva1a",1370.97488388462,1.32676671562147,0.3431902933805,3.8659797238  
218,0.000110644130660954,0.00107267062523678,9.07190517450637  
"Egln3",674.174050618311,-0.571805427456563,0.29978377737121,-1.907392  
82982788,0.0564697371888705,0.127677043950106,-1.17691926301918  
"Dcbl2",1189.91495863348,-0.124741342173824,0.129766259768563,-0.9612  
77164004718,0.336412826808753,0.480857510235105,-0.0913336509634409  
"Shc4",74.4526614930278,-0.847790800480693,0.397876382440477,-2.130789  
45596256,0.0331064913991052,0.0848239644283512,-2.09165011357663  
"Wnk4",6327.46453230518,1.82077076181143,0.482644692063208,3.772486866  
12092,0.000161628477017866,0.0014429633905194,11.9097641896883  
"Neil2",251.386460615029,0.591592217103132,0.246524760568973,2.3997273  
7723282,0.0164072863621878,0.0494297387963438,1.7790379113415  
"Gcfc2",557.006278659266,0.146394224678095,0.24011681271054,0.60967919  
332901,0.542074340115025,0.672522619213716,0.0580774485291812  
"Wdr78",307.906976253007,0.260611362213349,0.213160112213292,1.2226084  
8667867,0.221477606162704,0.357273960863772,0.268234868493954  
"Gm6781",1.59234364225293,-2.56603662506559,1.57875450217702,-1.625355  
06408828,0.104086924827667,0.203414017318022,-4.08644381688008  
"Brinp3",2.40603790460316,-2.13634149514546,1.24202044060927,-1.720053  
41079368,0.0854227333372312,0.17489997423179,-3.72479908140318  
"Arhgap5",4812.34802676895,0.0328619918785876,0.215901515986809,0.1522  
0824980495,0.879022687376097,0.924555139904302,0.00257777965649376  
"Secisbp2",2064.44362774259,0.440452217209565,0.153367244546225,2.8718  
7931499163,0.00408038762684619,0.0170508782572326,1.79332479558425  
"Nubpl",520.643636085292,0.10045638643362,0.32429369327892,0.309769781  
268052,0.756736033060249,0.842162615387458,0.0172566143916977  
"Gpr33",24.8339885248074,-1.2154743923433,0.631769095766033,-1.9239218  
8932495,0.0543643750450007,0.123831376708811,-2.53892484955779  
"Eif2s3x",4927.069335679,-0.215924663113067,0.275292811069282,-0.78434  
5447577729,0.432837438872478,0.574939919023151,-0.11951208398331  
"Elmod2",1676.86259477054,-0.783613672880056,0.369643978606103,-2.1199  
1461577434,0.0340132465877904,0.0866122870535115,-1.91696477778028  
"Ap2b1",6181.06976081623,-0.240834060737459,0.121705829380656,-1.97882  
10800011,0.0478361542426515,0.112537323289481,-0.526094864899427  
"Mitf",1211.01007172231,0.198357294766659,0.213286917027338,0.93000216  
5773885,0.352369963138191,0.497382473828456,0.138531938022797  
"Ints6",1254.31190396143,0.0116164856234838,0.372272261736543,0.031204  
2739077476,0.975106631490147,0.984521038460692,0.000181217308623404  
"Zc3h12c",596.616898369772,0.365738066718962,0.248223302571366,1.47342  
357840803,0.140636856388897,0.255177501011606,0.499523549650003  
"Kcne3",59.0962208947064,0.144814761103972,0.362566796753581,0.3994153  
97109282,0.68958715068,0.791987410258504,0.0337722190748587  
"Tanc1",4342.53249647195,0.354053651020665,0.145879856926481,2.4270221  
9813047,0.0152233243691444,0.0466558281278807,1.08515936704645  
"1110059E24Rik",719.751867646937,-0.355023489381637,0.196520381156199,  
-1.80654793814723,0.0708327932234734,0.151452769193035,-0.670100253056  
863  
"Plekhh3",1205.34022099625,-0.453767270494185,0.200862264685884,-2.259

09665612804,0.0238773731099892,0.0659621735475445,-1.23364520289628  
"Ccdc186",1674.13791226006,0.154867817316604,0.107408859327845,1.44185  
329111354,0.149343765407285,0.267122716990299,0.204432814986851  
"Ppp1r32",22.685661590476,-0.113369607914169,0.337951050085761,-0.3354  
61623467066,0.737276889241324,0.828268309888646,-0.021360889672704  
"Heatr5a",1690.72090848818,-0.274089594255055,0.22629047796472,-1.2112  
290217434,0.22580764289159,0.361863846560386,-0.278608578570059  
"Slc24a5",13.2745092749981,-0.083814505379072,0.721780803896641,-0.116  
121826635714,0.907555990677563,0.943208075594644,-0.00490049733455501  
"Fam124a",567.557796477028,0.239612316326732,0.277887389510218,0.86226  
4087438632,0.38854221020387,0.532793868384208,0.15086486669304  
"Ubd",921.138247650638,-1.77613823889848,0.729037826153128,-2.43627720  
700107,0.0148393075979049,0.0458391665944153,-5.4751528416779  
"Nkx6-1",51.5779169189518,-0.525778962492405,0.473564122206988,-1.1102  
5928240103,0.266887313544192,0.408876313309079,-0.470226514415336  
"Ano4",55.8073476821643,-0.0319029190125121,0.397224065455692,-0.08031  
46681858596,0.935986992375232,0.960064936468634,-0.00130018287590362  
"Tubg1",875.977578159432,-0.108480319723369,0.26512909250682,-0.409160  
37805462,0.682421969363295,0.786285990397594,-0.0260824328318553  
"Arl6ip5",3846.73905013337,-0.371008600531465,0.10901801899887,-3.4031  
860415232,0.000666049116000859,0.0042973612388434,-2.02190564560563  
"Chrnb4",13.8602015965562,0.0571281476084877,0.637885454342943,0.08955  
86303458398,0.928637960445306,0.956091596063947,0.0025651428754368  
"B020004J07Rik",0.21312868678269,0.886940425949497,4.78471990596623,0.  
185369351473122,0.852939345785746,NA,NA  
"Lars2",15161.9315562501,0.795719824815144,0.348227749973721,2.2850557  
5697282,0.02230955859409,0.0626608720062758,2.20415829902943  
"Epn1",10692.4409679511,0.39814661084021,0.131594588152016,3.025554594  
84608,0.00248177595580087,0.0117564790053949,1.76910505607883  
"Sppl2b",2055.02941104991,0.294029024368309,0.138148299303229,2.128357  
9012647,0.033307420802007,0.0851932429224102,0.724144430250646  
"Slfn8",728.05617312451,-1.06797122470363,0.37048508195238,-2.88262949  
502754,0.00394371000596344,0.0166369913513635,-4.37454541432339  
"Xrra1",8.1693732577751,-1.06449580107718,0.639806803703978,-1.6637769  
3221545,0.0961570154819603,0.191449963021266,-1.75974866007603  
"Leprot",4044.42623570124,-0.451186044444467,0.163033942066042,-2.7674  
3626956957,0.00564990908780218,0.0217797404891196,-1.72658750981167  
"Lsm7",1712.02294349288,0.150060087289298,0.169757208266396,0.88396886  
8372362,0.376713018545492,0.522006284954872,0.097550408937991  
"Rims4",126.576589389012,-4.96515502519443,1.33188844432098,-3.7279060  
767929,0.000193077303182014,0.00164753665533607,-31.8190670972837  
"Spcs2",5023.1043111212,-0.366861446276382,0.178126786997951,-2.059552  
36974325,0.0394413536254815,0.0968914593662138,-0.856314745155947  
"Ccdc106",361.020128438808,0.315699949839769,0.29314033976222,1.076958  
39506718,0.28149885311775,0.425452634466881,0.269797699463866  
"Pdk3",1184.78940372693,0.984111777143996,0.293047583826681,3.35819788  
818336,0.000784524271940665,0.00488243033970606,5.23755325855159  
"Abraxas1",460.283266799016,0.0976059225742569,0.240341191055697,0.406  
114000457115,0.684658839207714,0.788230871922059,0.0232267199035759  
"Trim13",316.81072185864,0.412560110130711,0.173587836685748,2.3766648

5168303,0.0174699531308041,0.0518315890697245,1.22107705008312  
"Scal",1306.01783717689,0.17582717050158,0.182970711804353,0.960958006  
708684,0.336573282720691,0.481051595549629,0.128666938238328  
"Lcat",198.255883329023,-0.348398936064901,0.352625591385914,-0.988013  
7590003,0.323145909793957,0.468111873190333,-0.264451503899532  
"Kcnk15",0.0837058623428614,-0.544048378937457,4.78471990596623,-0.113  
705376621746,0.90947135024012,NA,NA  
"Neu3",264.847065078996,-0.699105721195879,0.183899105782686,-3.801572  
16219426,0.000143780849028441,0.00131988653218293,-4.63521739875372  
"Oaz1",14650.6993088412,0.149806881294995,0.345636320263549,0.43342343  
5305545,0.664707178146422,0.772651756259624,0.0386392156930987  
"Eogt",1977.70388587862,0.0535385772134835,0.175300314661409,0.3054106  
16728742,0.760053436846161,0.844657846202704,0.00903857798682529  
"Pcyt1b",51.8195243779054,-0.879057695471528,0.371759107451565,-2.3645  
8953621212,0.0180500636716485,0.0530989953937542,-2.58055937104403  
"Hectd1",4835.97223328791,0.195766043994543,0.155976069881156,1.255103  
06897529,0.209441346529607,0.343024920198014,0.209460305701843  
"Tut7",4002.94614656224,-0.245592688505807,0.14952103814466,-1.6425293  
1596287,0.100480355823799,0.198035578474925,-0.397690346494663  
"Abi3bp",1147.66406240557,-0.97073720611171,0.342456944300537,-2.83462  
55590579,0.00458794255101785,0.0185785470113699,-3.86911363549958  
"Amh",32.0437729887252,0.357029307591776,0.500731021931579,0.713016154  
290839,0.475835760945625,0.61341128376316,0.174487231830446  
"Helq",531.907630751547,0.481292481383584,0.178863695970717,2.69083381  
494241,0.00712736893916832,0.0261318991304821,1.75411786630562  
"Pkig",2291.11584438084,0.201133802661912,0.215230306820448,0.93450502  
2239754,0.350043446554185,0.495006318604112,0.141434223070848  
"Impg2",89.0281765893249,0.943441485989588,0.353517133136537,2.6687291  
7196126,0.00761388164255144,0.0274257277418193,3.39287383889828  
"Hpse",148.44664528441,-1.64138317983388,0.344323252665091,-4.76698325  
520986,1.87004845228168e-06,4.50707104111103e-05,-16.4257777178112  
"Tpbq",254.140314944878,-1.06050052342734,0.282613512305822,-3.7524763  
5817126,0.000175096349134945,0.00152616388709573,-6.87734372608703  
"Raver2",242.822018688246,-1.0462258295889,0.200527921389373,-5.217357  
3751727,1.81493876118296e-07,7.14902544758491e-06,-12.396242848796  
"Arx",1.64481835122102,-0.5426230680295,1.26150718846659,-0.4301387047  
10101,0.667094746621098,0.774595841449391,-0.138593463486007  
"Plekhj1",2146.36981601935,-0.0682226185322992,0.109904944430489,-0.62  
0742031997002,0.534769369278499,0.666641291242151,-0.0276644882149028  
"Ssc5d",546.885039256507,-1.24260486382194,0.270934236493365,-4.586370  
77360419,4.51017345337968e-06,9.16990218915506e-05,-11.5524959839353  
"Adrb1",186.371385623672,-0.48143459974174,0.431922117091359,-1.114632  
89489273,0.265007768008363,0.40685995752969,-0.432947509777059  
"Vps13c",745.805556621092,-0.913566102738947,0.309896891418724,-2.9479  
6794687612,0.00319870228858277,0.0141746130051788,-3.88841389800297  
"Nat14",353.077733809625,-0.211549266359918,0.204795112181184,-1.03298  
005556284,0.301613232294688,0.446364690951182,-0.17063965099172  
"G2e3",887.127650384401,-0.243725921521238,0.114873071664063,-2.121697  
60928822,0.0338631395226174,0.0863202372090462,-0.597053247603747  
"Wdr38",68.2736418796754,0.018024686913613,0.203372650583817,0.0886288

636248284,0.929376868489762,0.956303244594089,0.000805346882466393  
"Sgcg",3.91954146518909,-1.80912625962099,1.11819933634644,-1.61789244  
620021,0.10568577847693,0.205489572165088,-2.86268901018311  
"Cops4",1802.51701294811,-0.264632158875959,0.19476740820056,-1.358708  
63262429,0.174238935505327,0.300274948248441,-0.318367499680727  
"Klhl35",14.3540753993859,0.00412262209753831,0.646021168876348,0.0063  
8155883453317,0.994908287291494,0.99685106811971,1.30023386536469e-05  
"Mid1",1910.01164885073,-0.00528893410038294,0.293682168373287,-0.0180  
090406226516,0.985631641207476,0.990729196996256,-4.92613668288321e-05  
"Ror1",513.618923234692,-0.52745040795066,0.288160775139406,-1.8304032  
1048377,0.0671896679981415,0.145417265692947,-1.01700243587833  
"Lin54",467.398989354821,0.10635374811322,0.104620243031032,1.01656949  
966819,0.309358269809704,0.454434996306428,0.0838812434679631  
"Gnptab",1608.83755146927,-0.702969235195655,0.226797277170293,-3.0995  
4883042014,0.00193815626747968,0.0097523021685984,-3.25492463830376  
"Gdpd5",927.789115124268,-0.643678676660482,0.168737943270166,-3.81466  
470543551,0.000136367960309661,0.00126725250828176,-4.29391872405561  
"Sec31a",5351.68277476412,0.220334930114323,0.11138302146527,1.9781733  
9856438,0.0479091485897277,0.112681855151087,0.481032326917064  
"Fbxo33",1525.14704478415,0.414823922394691,0.118885511688963,3.489272  
29652662,0.00048433750222151,0.00337512959911186,2.36089633132753  
"Lzts2",4782.02966641113,-0.403936687157206,0.14528608200445,-2.780284  
8117608,0.00543112416058403,0.0211611338396684,-1.55741388378032  
"Nup37",305.384711144587,-0.182231792728722,0.17226728613653,-1.057843  
29001558,0.290126893010857,0.433910727922504,-0.152148323661949  
"Ccl12",201.857721952064,-1.57507463180427,0.598610743834925,-2.631216  
77655458,0.00850797484288937,0.0298187150278683,-5.53263717499871  
"Uvrag",1729.18053597241,0.098581895756413,0.162873750688207,0.6052657  
06351484,0.545002463753487,0.67502713939123,0.0387429198949954  
"Kcnh4",12.5608844974864,-2.06527567066239,1.01027854253235,-2.0442636  
200959,0.0409275111469713,0.0996758196781971,-4.76217906530545  
"Nfkbiz",3379.75020761295,-0.479567918890124,0.297720196679907,-1.6108  
0075936444,0.107223155551256,0.207672304255328,-0.753781930474844  
"Pdzn3",1265.03825447157,-0.077610748010162,0.128819390884996,-0.6024  
77216178187,0.546856524744297,0.676733213979709,-0.0303053016653508  
"Parpbp",44.3417827406599,-0.536519193758244,0.422225679790171,-1.2706  
9294796298,0.203837905364666,0.336217873174881,-0.584803719907633  
"Rmi1",1615.63688894919,0.0583290683271,0.131761720016058,0.4426859965  
0939,0.657992872711426,0.767179634762147,0.0154592038318107  
"Gm49322",287.137829735201,-0.327847841802272,0.203585609926188,-1.610  
36844362986,0.107317445393731,0.207772371193225,-0.51515130301201  
"1810055G02Rik",349.465721789264,-0.560994116425417,0.208609254941271,  
-2.68921010519572,0.00716213247570988,0.0262248373730312,-2.0426066884  
7185  
"Ccl7",182.407079624374,-1.52872662799732,0.549325923412681,-2.7829136  
8173583,0.00538731369328781,0.0210378214283448,-5.9030761231198  
"Hacd2",3985.45769415081,-0.838794269685404,0.548056048298212,-1.53048  
994220568,0.125895501147199,0.234833108329484,-1.21531240456927  
"Shq1",242.491326394445,0.146292521158067,0.180672467794515,0.80971120  
250846,0.418106177989454,0.561218734903979,0.0845050772106512

"Pcsk7",1813.7957344956,0.190760517965305,0.12816970767052,1.488343239  
85262,0.136660397170895,0.24954655649113,0.264796541013736  
"Ccl2",520.355983366816,-1.61366935018611,0.567450375022266,-2.8437188  
8929105,0.00445903695164064,0.0181773578262783,-6.46690665020432  
"Brsk1",364.397959830021,-0.20156951813678,0.322899319410527,-0.624248  
816952471,0.532464191715347,0.664724895777591,-0.0823173658744294  
"Dennd1a",2262.54469273321,0.462112287319191,0.13042973054854,3.542998  
09848348,0.00039560555488001,0.00287281829014914,2.70449448500572  
"Cfap53",44.9138480320293,-0.140215036343966,0.3697843556493,-0.379180  
55267039,0.704553791910523,0.803759675923176,-0.0306306708610812  
"Dcaf8l",0.253795162058599,1.33353138756081,3.97321945166281,0.3356299  
35316742,0.737149947066294,NA,NA  
"Klf16",650.500330204851,-0.172234605444708,0.118726147209259,-1.45068  
807076793,0.146866738726438,0.263659669614961,-0.229605287300997  
"Oser1",1604.7370862571,-0.136314426063188,0.111659782392415,-1.220801  
46622646,0.222161198538719,0.358012281548298,-0.140020540929949  
"Emsy",3300.88861255948,0.165516871654351,0.186760269051383,0.88625312  
2760353,0.375481143387838,0.52053323508865,0.108066192404457  
"Crb2",427.235224466076,-0.366496218053705,0.501537994873435,-0.730744  
672985727,0.464935123391374,0.603790131602838,-0.184907825874562  
"Kank4",386.333160546609,-0.0973295936976902,0.330436209003044,-0.2945  
48814705696,0.768338568090087,0.849989526276341,-0.0158191006815536  
"Tmem98",1149.77104089869,-1.03418388452211,0.232511413280102,-4.44788  
438525489,8.67201819380281e-06,0.000152605605363508,-9.08804984694718  
"Ptprh",35.2560680460304,-1.44766673651762,0.916820984434294,-1.579006  
98292903,0.114334455373895,0.218279957982983,-2.20331522931897  
"Sstr1",0.580052293987603,-2.66329180858297,2.94229653016267,-0.905174  
506131688,0.365372945595085,NA,NA  
"Abca17",23.5294151290656,1.08516708377781,0.671050314310479,1.6171173  
1689277,0.105852959555976,0.205679982877783,1.71611990414299  
"Rabgap1",2167.20246203136,-0.0410284843487918,0.176755284428847,-0.23  
2120270018336,0.816444601592249,0.882692059184005,-0.0051194884502532  
"Haus8",538.95979475753,-0.84597043022866,0.206556548501104,-4.0955875  
5879454,4.21099033833898e-05,0.000507452964257932,-6.4176218071514  
"Myo1d",2449.39437704168,-0.368373878753425,0.205888480719377,-1.78919  
130136043,0.0735840120952131,0.156068864117531,-0.684238983211278  
"Thyn1",973.780350925815,0.250299652863313,0.127057696373356,1.9699684  
4746668,0.0488419868322532,0.114365444848718,0.542738829469981  
"Ccr3",6.34774851003471,-1.82906381143768,0.985158852058817,-1.8566181  
5616359,0.0633654989628282,0.139074054122989,-3.60828330057597  
"Foxa1",533.187319950247,-2.71463605611897,0.739172031678859,-3.672536  
21589726,0.000240155103435785,0.00194823172382901,-16.9415906243291  
"Figl1",135.061908819387,-0.999148606134304,0.362650889079847,-2.7551  
2520779817,0.00586696788927922,0.0224346224563966,-3.79391699792191  
"Prdm8",3.69916104409063,-2.52385523238509,1.06518191181216,-2.3694124  
0214202,0.0178163749604524,0.0525860852223586,-7.43352023934815  
"Tnni3",361.164250197406,-0.882919489533436,0.475895803659088,-1.85527  
899751333,0.0635563957866906,0.139379440450893,-1.73984165974119  
"Stab2",154.364674493719,0.257552539697345,0.442066561254374,0.5826103  
17700877,0.560155658098563,0.68847169828579,0.0961394870835743

"Rcbtb1",1689.4198526942,0.48658096764421,0.238080635265229,2.04376541  
209302,0.0409767276342923,0.099770758668011,1.12151080781105  
"Slc25a21",660.40747996798,1.4690830783155,0.546629322599674,2.6875306  
8592954,0.00719824880236666,0.0263430556363713,5.34239492336659  
"Galm",3388.25956554605,0.984554064275998,0.371400532719937,2.65092259  
579073,0.00802722356479642,0.0285663086450813,3.50060882921523  
"Tab3",748.088465133289,-0.363689324187255,0.243588147225844,-1.493050  
16820075,0.135424055215415,0.247701522381816,-0.507539652237799  
"Mbd3",5403.81536335619,0.126626018181474,0.134381281532705,0.94228911  
0039896,0.346044642046396,0.490775271357334,0.0901284682281183  
"Plk5",72.9657756947528,2.04800483542506,0.378231776525696,5.414682114  
33031,6.13976853371755e-08,3.15865981188456e-06,25.9387241144533  
"Tgfb1",3176.34919295587,-1.27498753016668,0.22319941001378,-5.7123248  
2239968,1.11443111540203e-08,8.69167115524347e-07,-17.7933822628216  
"Tstd2",2121.80667956936,0.0662747769670907,0.168639322557364,0.392997  
172676301,0.694321569612977,0.796145898336474,0.0151088478375549  
"Cdc1",1929.68321166978,0.461074078079467,0.154917543468542,2.9762547  
7241765,0.0029179234242972,0.0132464891564486,1.99369479428362  
"Reep6",1128.81774165362,0.430973570715112,0.528846349879673,0.8149315  
40726659,0.415111497788281,0.558427210147365,0.251098562456582  
"Cox18",535.352968491272,-0.0810580096130819,0.208030303515222,-0.3896  
4520189315,0.696798922439473,0.797732686848972,-0.0183176281513792  
"Slc12a8",70.9674530986601,0.17126536484848,0.22972924226297,0.7455096  
40659647,0.455963685270716,0.596109691257103,0.0886008110649351  
"Fbxl21",94.2080784383527,1.23597529031525,0.289953049742614,4.2626738  
7569265,2.01995212747426e-05,0.000290844253564796,10.0642039853415  
"Ntng2",756.967772735624,-0.860721704758192,0.272215746201425,-3.16191  
005395148,0.00156737969630433,0.00832491673073869,-4.12156781596739  
"Tdrd7",1526.15525644142,0.52486104924571,0.206992074689283,2.53565770  
589808,0.0112236379343903,0.0370912699058885,1.72908841032011  
"Gnptg",2421.19739973385,0.860053660885819,0.143574282987331,5.9903044  
1239752,2.09448626020303e-09,2.65183721437913e-07,13.0236575263138  
"Npffr2",0.207362170746708,0.880352364710176,4.78471990596588,0.183992  
455569343,0.854019373469052,NA,NA  
"Prdm4",1017.47456822081,-0.184211319608003,0.092881119903164,-1.98330  
209411835,0.0473336956400797,0.111624624769022,-0.403904244890136  
"Eif1",18293.3931299339,0.37518408582455,0.164017603102009,2.287462313  
3665,0.0221688527355467,0.0623830786777362,1.04093369476213  
"Ccgc180",26.7805595256031,2.26341232407816,0.721986214347065,3.134979  
97482556,0.00171865843175681,0.00892420828292791,10.681014833712  
"Gc",1087.02247741805,-0.826982722672995,0.626938610625813,-1.31908086  
159743,0.187142080671656,0.315921756617831,-0.952899692316279  
"Leng8",17485.3414080976,-0.0509536761152617,0.203708970507352,-0.2501  
29761042717,0.802487001346046,0.874030362654743,-0.00686041131113227  
"Capn5",1195.44358340879,-1.19167871614769,0.263829804382998,-4.516846  
45309347,6.27673847544281e-06,0.000118359619723582,-10.774900289578  
"Igfbpl1",1.99831484129547,0.351506943123727,1.8314893674726,0.1919240  
97058121,0.84780166159349,0.902791705035749,0.0359463029037895  
"Krt17",37.7572664677984,-1.75117764302971,0.729833708453265,-2.399420  
06342921,0.0164210647468252,0.0494483274800922,-5.26548829578813



"Mpv17l2",910.218704658313,0.0223468143078527,0.290976742762965,0.0767  
993142532937,0.938783196275565,0.962072677440396,0.000864045897020032  
"Wdr20rt",2.15177835041599,-1.51646556259096,1.394479860628,-1.0874775  
6450784,0.276825808496362,0.420369907637233,-1.31419972380055  
"Aldh1b1",129.869087457249,-0.191905135325252,0.337056149051882,-0.569  
356577131345,0.569114178774378,0.696059983549293,-0.0695309609916089  
"Pcdh17",1302.54575734539,1.72717098352628,0.223419209790116,7.7306288  
2618203,1.07016629690912e-14,1.60508480439492e-11,42.9292828757198  
"Ankrd11",11435.1769169219,0.0734205557556578,0.212806340045768,0.3450  
1112955501,0.730086003706389,0.822987622146452,0.0143033608373822  
"Dcaf10",1262.58094990386,-0.164151545941509,0.148801999736019,-1.1031  
5416615852,0.269960221577905,0.41230755236153,-0.145435925915663  
"Utp6",2034.0839942405,-0.0972860433838181,0.183972376853695,-0.528807  
884355299,0.596938727788655,0.719305337063229,-0.0320527687320252  
"L3mbtl1",36.4185827830908,-1.62222732753988,0.596405549117743,-2.7200  
0709909494,0.00652805148061985,0.0243979198330699,-6.02374763343408  
"Iqcg",404.451800647726,1.67747529974619,0.534707751346992,3.137181564  
17301,0.00170580457446793,0.00888586096526203,7.92320888605965  
"Kcnh8",44.599968153305,-2.20006246135615,0.591622421965756,-3.7186935  
1071263,0.000200255851413253,0.00169543623183836,-14.0359919480703  
"Tsen34",3133.38993915496,-0.197278512431847,0.213654081414502,-0.9233  
54757024811,0.355822360988795,0.500889783738324,-0.136392286259281  
"Krt33a",0.45339459023758,-1.49943290713355,2.69681544964572,-0.556001  
30417917,0.578209963215383,NA,NA  
"Chrna5",2.30194063203284,-1.22100363837437,0.969051322744128,-1.25999  
89388764,0.207669745035053,0.340765872140779,-1.31448322451393  
"1600002K03Rik",452.242780121268,0.0477454375542648,0.181711125444462,  
0.262754619110306,0.792739715441601,0.866852053820893,0.00682220034296  
491  
"Mboat7",2216.39541538141,0.0839219760577083,0.111992956186305,0.74935  
0485204626,0.453645986457463,0.594035557014614,0.043707916368417  
"Prpf39",3779.89183067371,0.0912089841552544,0.172659263936402,0.52826  
0008040174,0.597318884714927,0.719543038068185,0.0300204281635555  
"Trmt10b",416.897235106825,-0.128605775064748,0.141593630254963,-0.908  
273732604864,0.36373361691368,0.508647928177791,-0.0869374004070032  
"Ky",37.1494728113855,-0.612836271960478,0.60476801792173,-1.013341072  
60909,0.310897275548908,0.45612303074888,-0.481072000755241  
"Togaram1",1287.79984934981,0.223783736955111,0.1379838071572,1.621811  
5847475,0.10484369718071,0.204342503761444,0.355359120087597  
"Frmpd1",36.985549660724,-0.0192425271060133,0.318372959020598,-0.0604  
40205616735,0.951805037719222,0.970064012620845,-0.000584842307147056  
"Ric8b",1139.9556573868,-0.251752825040507,0.190183720809979,-1.323734  
88103141,0.185591109681334,0.314070691728827,-0.291564308238654  
"Midn",4392.84773998306,-0.292202126020752,0.137252534260561,-2.128937  
92886938,0.0332593962000499,0.0851150685271786,-0.719913335880385  
"Rsf1",2017.05948417085,0.21207144886876,0.174721308952416,1.213769803  
69645,0.224835640243277,0.360958856604645,0.216098960902456  
"Rubcn",2361.89099797601,0.108025027344538,0.149140015843889,0.7243195  
37806757,0.468869584898831,0.60695917981393,0.0539362198359688  
"Cnot3",2789.24432140803,0.166943499753077,0.204505601691822,0.8163272

71096718,0.41431298093285,0.55770432534374,0.097482706786738  
"Grhpr",4960.30351448897,1.37811696827623,0.469162189895731,2.93739989  
700045,0.00330977005499262,0.014560897232005,5.8286294249721  
"Muc20",613.860002361877,-0.607252507552612,0.623621388168063,-0.97375  
1893494967,0.330179744216886,0.47480231969473,-0.452316117444694  
"Cbarp",690.14216736019,-0.676698254593641,0.248098405509894,-2.727539  
71635926,0.00638085756473417,0.0239779863672454,-2.5245034363993  
"AamdC",1400.39463145033,0.287582227907565,0.38208016964621,0.75267509  
4794514,0.451645179472149,0.592250837941217,0.150642766601804  
"Zcchc7",3010.77500843375,0.201470449341836,0.195943764865394,1.028205  
46231843,0.303853189531239,0.448624071594737,0.161492667869934  
"Lrfn5",0.561724898437956,-1.24886476490044,2.12712612553448,-0.587113  
641221741,0.557127386557504,NA,NA  
"Gtf3c4",1056.85446785242,-0.426252472117529,0.160769187404731,-2.6513  
3188142857,0.00801750163473167,0.0285525565066663,-1.51575754272293  
"Zswim4",581.206568062451,-0.380742860163223,0.186217313526817,-2.0446  
1579297992,0.0408927512613542,0.0996160499867421,-0.878157509952227  
"Sbno2",5707.96881630917,-0.61368141956991,0.285287385897925,-2.151099  
03173035,0.0314683839258916,0.081504213775998,-1.53856102900769  
"Ndufa3",4532.01899487772,0.781410375723078,0.309052672757699,2.528405  
17038891,0.0114582035400139,0.0376980897343412,2.56157718500308  
"Tnfsf9",84.10759945619,-0.712949878392281,0.346607720198985,-2.056935  
94471289,0.0396923878387944,0.0973242175654945,-1.66096462528411  
"Kcnc2",252.769164867858,0.732803412956305,0.239900674932758,3.0546117  
1862773,0.00225352065776899,0.0109655966521537,3.307136295179  
"Melk",82.5689283240169,-1.35130433379106,0.533539135788209,-2.5327183  
0152581,0.0113181869539583,0.0373404414937865,-4.44265395831002  
"Thrsp",21999.9880354577,-3.80249897884527,1.21363785343585,-3.1331413  
799267,0.00172946115918844,0.00895882935224659,-17.9292226845124  
"Isg15",1028.88359479423,-1.12138049543037,0.340002327336314,-3.298155  
35151074,0.000973222731568527,0.00575027176367368,-5.78465043843244  
"Caps2",115.337016939055,0.61549405770775,0.360701415902429,1.70638104  
141583,0.0879371580883124,0.178827566583846,1.05947038831109  
"Rnf38",2617.89298432318,-0.271140479150355,0.138001664137942,-1.96476  
238778781,0.049441745344581,0.115326612122101,-0.585659929305085  
"Arhgap45",5092.11506296423,-0.903455496006969,0.40179499506122,-2.248  
5484068046,0.0245412420453911,0.0674140796563871,-2.43653037928086  
"Slc51a",2221.20388948845,2.28093341719548,0.71564456600549,3.18724339  
643485,0.0014363584654034,0.00777566321699741,11.077938253253  
"Alg8",518.592770469817,-0.0904462159980714,0.16500738500658,-0.548134  
351650168,0.58359965484878,0.70756286968297,-0.0312879502113368  
"Dok3",1028.3036156773,-0.255535732953045,0.383643973161652,-0.6660751  
91660506,0.505363040608033,0.640299471426046,-0.113922758515397  
"Usp35",697.701558097154,-0.962611988406038,0.272439429780355,-3.53330  
642771536,0.000410396499153507,0.00295491541377219,-5.60652680873728  
"Abca7",1658.77427900661,-0.368795048206887,0.161740014678041,-2.28017  
197192055,0.0225974909646697,0.0632599913019853,-1.01805954140824  
"Prkx",1901.32511301528,-0.153562545643931,0.135637236975196,-1.132156  
2505141,0.257568749534117,0.398518163651883,-0.141277880096554  
"Supt16",2983.352473689,-0.260923237635781,0.0962734223743031,-2.71023

124763689,0.006723631273455,0.024985203462898,-0.962668846548926  
"Dagla",591.942989995657,-0.806694705890078,0.3100003157061,-2.6022383  
3660503,0.00926174617785113,0.0319112081596998,-2.77890029165915  
"Grin3b",33.6167147537512,1.46774313238526,0.520198354854212,2.8215066  
7853727,0.00477986422480059,0.0191843953592346,5.80295448313685  
"Wdr18",2561.68256435101,0.903806156111493,0.251887501215482,3.5881341  
9383726,0.00033305286672168,0.00251019126221079,5.41144566092004  
"Selenoo",1895.10772773539,0.609047729741927,0.132957538615992,4.58076  
868812215,4.63270010455495e-06,9.35310419996925e-05,5.65026805983624  
"Bbs10",301.889485447256,0.223470305584474,0.146764887276832,1.5226414  
8278844,0.127848425436166,0.237255315053602,0.321488502180137  
"Tmem161b",1246.30046540713,0.421783995371824,0.133352307955904,3.1629  
298497878,0.00156189963226351,0.00830033225126028,2.02096103056855  
"Fbxo45",924.426669131233,-0.512264872499089,0.14338213225893,-3.57272  
46096048,0.000353286235919236,0.00262414286779172,-3.04439063047864  
"Dym",1152.51073894105,0.346343014513156,0.203520744156952,1.701757803  
35228,0.0888007796477117,0.180163862087883,0.593593308684569  
"Xylb",11988.2143980279,2.11821854946461,0.682287577260004,3.104583199  
31773,0.00190547328832488,0.00961624417219306,9.83764560615469  
"Dync1li2",4005.63552878506,-0.502945604002574,0.143732217216113,-3.49  
918489914028,0.000466682837978318,0.00326728257626616,-2.8787583663352  
7  
"Mrps2",1769.56539431398,0.275736711307228,0.250247149646657,1.1018575  
5041191,0.270523605859514,0.413008380421072,0.243830498051374  
"Kiss1r",144.668619805375,0.179680789160405,0.247633092182824,0.725592  
801739717,0.46808843520587,0.606350538775183,0.0898937621688232  
"Krt20",761.455420329683,-3.41327663126427,0.68490958774924,-4.9835433  
6443301,6.24303141592712e-07,1.88140071943968e-05,-37.1395520821757  
"Cd99l2",2140.20000745829,-0.574229056286385,0.261309308800133,-2.1975  
0708049055,0.0279842513567435,0.0745507491397438,-1.49085665163866  
"Ggta1",965.338128289354,-1.57981355338936,0.280822472357636,-5.625666  
42237028,1.84793146904393e-08,1.28682027797923e-06,-21.4275424894579  
"Ugt2a3",37.2256713430772,2.16103277825444,0.688624851532472,3.1381858  
6919316,0.00169997041313396,0.00886494333118106,10.212286130214  
"R3hdm4",4679.01059124565,-0.118846703847926,0.119085468804735,-0.9979  
95011824656,0.318281777462031,0.463296610448278,-0.09143920433073  
"Acta2",8486.12188005702,-1.62261078965238,0.275454967277511,-5.890657  
21228274,3.8466272667953e-09,3.98944353446675e-07,-23.9082676432765  
"Cep19",735.934255796508,0.486739648596699,0.165470138814889,2.9415558  
123222,0.00326567987446394,0.0144026750039127,2.06394224669984  
"Zdhhc17",1747.53095508111,0.0221804689628717,0.11260013276496,0.19698  
4394407161,0.843839749977416,0.899917269871446,0.0023389846223409  
"Twist1",178.005287431022,-2.44567151112416,0.480810746489662,-5.08655  
750517162,3.64621199295061e-07,1.24452665318564e-05,-27.6218303136029  
"Mlc1",0.120701025406302,-0.999956691173236,4.78169649435351,-0.209121  
740025541,0.834353203805696,NA,NA  
"Ugt2b35",4.03641368403791,0.0756845941503143,1.02296461793925,0.07398  
55443903625,0.941021887639446,0.963455406699954,0.00281766741791208  
"Plekhs1",157.64885056555,-1.15008370794771,0.502809978190749,-2.28731  
28176295,0.0221775708727468,0.0623980197513443,-3.19058722410232

"Tk2",1608.40196798917,-0.132044775863801,0.117657690260155,-1.12227917760271,0.261743756654418,0.403277737435626,-0.119913793206368  
"Pim3",7881.05674049434,1.46120126757644,0.401336118723211,3.64084167710852,0.000271748212339361,0.00213802139914187,8.98328195016504  
"Ppp1r26",425.354485141055,-0.174987427644274,0.2012644286074,-0.869440411577232,0.384606287483995,0.52925777354527,-0.111340944679669  
"Krt25",0.825195398248248,1.18105198704686,2.17976296235196,0.541825880816191,0.587938460545641,NA,NA  
"Polr3g",382.371312320293,-0.232394377059984,0.278137312046729,-0.835538300668343,0.403414691465752,0.547298890495354,-0.140078083070362  
"Plppr3",812.135442024287,-0.853330387666327,0.433056236391863,-1.97048400636394,0.0487829262026724,0.114268319930287,-1.85104932229565  
"Ugt2b1",3.22445395467382,0.881744823734616,0.747398974716248,1.17975118184952,0.238099190945747,0.376242647302065,0.861924086395491  
"Lysmd3",985.225549658929,-0.154377860169884,0.11863364452066,-1.30129914488971,0.193156079825156,0.323414104287753,-0.17426508168917  
"Ddx11",432.667961888422,-0.666426014137809,0.220013581024636,-3.02902216778693,0.00245346679505634,0.0116620418259407,-2.96653942193159  
"Alg12",709.314508108626,0.171105720697955,0.149452919253972,1.14488041820841,0.25225869662118,0.392415834268372,0.160057971806167  
"Ids",2380.83541474992,-0.306433676821041,0.184629678310697,-1.6597205802708,0.0969706772028953,0.192721125903809,-0.504546443716972  
"Krt222",38.4939946842846,-1.77183411275118,0.703546927548159,-2.51843060266921,NA,NA,NA  
"Ythdc1",6608.97966896442,0.0697497031359318,0.123030972337364,0.566928000411725,0.570763099592739,0.697376796331572,0.0251398448352801  
"Misp",1063.35580123825,0.705426967792582,0.43519433320031,1.62094704360015,0.105028996444193,0.204634284838564,1.11918166052566  
"Cdhr3",5.96175398426524,-4.137209358324,1.07626505463939,-3.8440431940905,0.000121023689989798,0.00115598222147837,-27.9791396719563  
"Tmprss11b",2.98921318425137,-2.4263452895071,1.29461309633798,-1.87418565158224,0.0609048410824479,0.135099270924411,-4.85692559631173  
"Palm",5266.32857676976,0.47301412913339,0.173297544459438,2.72949123779479,0.00634321347787378,0.0238626232667534,1.76691680871974  
"Syt1",32.9071965364159,-0.685102790740276,0.612935418787615,-1.11774058039493,0.263677805746537,0.405605324654762,-0.618219424540147  
"Zfp983",488.738035548456,-0.502454947320265,0.172996663671011,-2.90441986948249,0.00367934372562035,0.0157843441060826,-2.0845532848459  
"Pawr",1576.89418956697,-0.122240252365973,0.244637668274082,-0.499678783027887,0.617301274328665,0.736020317180965,-0.0374663385667353  
"AI182371",53.1993454608588,-0.183843431638577,0.291672516689385,-0.630307694825975,0.528493289496559,0.660930162183561,-0.0761308702384717  
"Zhx3",2541.30343989364,0.511701964831798,0.172878951658639,2.95988586188438,0.00307753037624412,0.0137785734273267,2.19245898476994  
"Hykk",5832.25576031179,1.78137420533997,0.633351540959902,2.81261525414485,0.00491404095189722,0.0196139141207967,7.00350129802979  
"Cox8a",18750.9925119336,0.493004944716577,0.395382951568878,1.24690491271901,0.212432365192287,0.34672746162056,0.522198834393716  
"Rnf126",2354.69154723428,0.301116708599976,0.192213269724046,1.5665760695517,0.117213815029741,0.222491721714358,0.452537877852595

"Cerk",1753.92990755186,-0.935359833228542,0.191047056792502,-4.895965  
67951552,9.78241395544844e-07,2.73654960263032e-05,-9.82710330255871  
"Rnase1",81.7139718348318,-2.55787380439714,0.736309680894433,-3.47391  
032709221,0.000512932425258133,0.00353148178943611,-14.4418519973016  
"Uba6",1078.99705831629,-0.0645129685179489,0.126042654425674,-0.51183  
4416784609,0.608766900893269,0.728785966330016,-0.0204103026130239  
"Gramd4",1813.99672659231,-0.32254306771409,0.153975279544897,-2.09477  
176250257,0.0361912864132306,0.0907266945585906,-0.774072284873203  
"Dennd5a",3450.02366208896,-0.366572970456611,0.0987505510601736,-3.71  
211063149653,0.000205538105890392,0.00172964263644837,-2.3313456091761  
"Dcdc2a",3748.59541355058,-0.570283368444814,0.575653202155417,-0.9906  
71755684678,0.321845886986854,0.467055009263894,-0.43416142490525  
"Cd276",397.323084254591,-1.60629771797994,0.286808825998532,-5.600586  
77548564,2.13627433951451e-08,1.43251186746293e-06,-21.6144723702279  
"Ptprq",2.36546449250475,-0.391207358479912,1.39525467243437,-0.280384  
195236095,0.779182761329448,0.857300145384565,-0.0602330991451079  
"Bbs9",545.815094979465,0.0909176326013462,0.13362442434849,0.68039681  
401534,0.496253237803593,0.632001674114596,0.0417187590979384  
"Myf6",0.121527413527064,0,4.78471990595379,0,1,NA,NA  
"H2-  
Q4",9177.48614750066,-0.917272154087488,0.251883440000242,-3.641653274  
57258,0.0002708927627588,0.00213449719005771,-5.64078728038489  
"Chst4",2.22407550786999,-4.11773753169202,1.91745842184157,-2.1474976  
9006061,0.0317536808914832,0.0820913908806868,-10.2940231785472  
"Cog5",1446.59563535175,-0.0692434981345262,0.204499773043299,-0.33859  
9388664677,0.734911543200456,0.826648853340777,-0.0131822501448363  
"Pknx2",566.157945970262,-1.16257296628552,0.34893821696831,-3.331744  
44572549,0.000863034681842488,0.00526355995442522,-6.09995953262751  
"Aldh5a1",2284.85094258924,1.01142922020166,0.379216783205489,2.667153  
10343633,0.00764968146998844,0.0275190939671281,3.63393895085911  
"Ibtk",2000.40953776146,-0.25585195184313,0.192325938622284,-1.3303039  
292355,0.18341815310715,0.311576733065859,-0.298351426692114  
"Ttc38",2643.10435700049,0.697064396311923,0.258366463384004,2.6979677  
9033156,0.00697641903895568,0.0256847089164573,2.55255184546403  
"Acss3",1298.05162352817,-1.35596667991841,0.577735128471199,-2.347038  
65680899,0.0189232913740224,0.0551107296804614,-3.93014853831476  
"Fbxw2",2216.80162211883,-0.478629401830276,0.185002265249449,-2.58715  
427719176,0.00967722528379896,0.0329641052731503,-1.63324435216808  
"Ascl3",13.5790231465263,1.35569697106022,0.441649113031896,3.06962457  
538619,0.0021432800007371,0.0105369827166848,6.17230399764654  
"Pip4p1",2294.0612395944,-0.282922566720225,0.127808185113718,-2.21364  
982585812,0.0268528769347298,0.0723472978407298,-0.743033079280234  
"Dock4",1196.02786480325,-0.01483107783303,0.254964916471494,-0.058169  
0925884237,0.953613939562375,0.971185435097736,-0.000433628912070937  
"Tdp2",1614.23470493619,0.55086500387573,0.0931234580476682,5.91542684  
759142,3.31016004734177e-09,3.56582876260054e-07,8.17852698598087  
"Apex1",1277.68612548298,-0.658320822820687,0.211107485186879,-3.11841  
53524349,0.00181826363052254,0.00928076027956245,-3.08081756065656  
"Tmem59l",30.3538758724022,-0.486269827799474,0.530624401861335,-0.916  
410602478377,0.359451576452697,0.504577886081692,-0.332624642372888

"Ints6l",3254.56411139026,0.339857089391138,0.288162850159935,1.179392  
44841072,0.238241940741584,0.376346217336094,0.332123902492884  
"Rusc2",1684.85500837792,-0.267828418197764,0.223591998734708,-1.19784  
437597672,0.230977607770944,0.367851130957924,-0.267849029763999  
"Nme5",159.768136474044,0.914474914310022,0.373364613164997,2.44928116  
394871,0.0143141662074636,0.0447330795177223,2.84131198234443  
"Fnip1",2454.70970137869,0.651742526260514,0.140422884177481,4.6412842  
8979405,3.46250358360131e-06,7.4352307128919e-05,6.19591797285527  
"Fam214b",1740.33231770868,-0.027091082157906,0.135979176278012,-0.199  
229638680247,0.842083115809571,0.898978131409057,-0.00288510733469428  
"Ripor2",254.248076444117,-0.6640821595967,0.25061774181694,-2.6497811  
1598248,0.00805439339764743,0.0286264240735198,-2.35976619382105  
"Mettl25",246.946982555239,-0.00243389704307889,0.190978005555358,-0.0  
127443840247529,0.98983172800443,0.993244765201501,-1.64973306206181e-  
05  
"Tmtc2",356.93237479009,-0.954691146154728,0.318065377652325,-3.001556  
32531088,0.00268603342681811,0.0124547633189297,-4.18694326181868  
"Fam122b",277.189062742516,-0.31831444897523,0.153299851744326,-2.0764  
172003644,0.0378553817875704,0.094014040771118,-0.752594397086118  
"Parp2",1155.16732459264,-0.290090948612863,0.160958998179708,-1.80226  
611679691,0.0715035467570964,0.15248563432898,-0.545569663344903  
"Tmem63b",2507.26612928728,-0.0499085558677719,0.140010903082293,-0.35  
6461923814872,0.721494662189136,0.816039382989951,-0.010146043164691  
"1810046K07Rik",0.370165826670535,-0.0725501076226697,3.64882828723982  
, -0.019883124639321,0.984136607072032,NA,NA  
"Prtg",65.9399295184162,-0.156932074986039,0.367107324857119,-0.427482  
82139867,0.669027694756913,0.776067587400414,-0.039784739416796  
"Zfp57",505.834314859805,-0.475873645591662,0.308258029333509,-1.54375  
101476046,0.122648662439129,0.230296958805676,-0.698766045535201  
"Adamts12",2802.69104151147,0.0985881591586241,0.485926143785389,0.202  
887126818527,0.839223256341316,0.897124821651609,0.0107027573773801  
"5031439G07Rik",3306.3521012568,-0.447981669998638,0.140337961177162,-  
3.19216316270341,0.00141211539801374,0.00767375307426753,-2.1816480939  
611  
"Dnajb5",866.16099138617,-0.602798851090404,0.195241289611854,-3.08745  
579528177,0.00201877794320702,0.0100721935354786,-2.77165511262437  
"Fmnl2",1351.68220612643,-0.747861676403676,0.233273125632474,-3.20594  
871087699,0.00134617980455442,0.00739923133738739,-3.66929294179496  
"Sugp2",1684.1206329831,-0.145689826160788,0.171138693477574,-0.851296  
82364835,0.394604488929193,0.538908617016278,-0.0900668002265653  
"Pttn23",3691.27699979895,0.147056758690441,0.231392361814142,0.635529  
874614269,0.525082888867536,0.657853297321304,0.0615834477878179  
"Smug1",675.31913282226,-0.297941351055571,0.164288767487288,-1.813522  
34612524,0.0697512952428248,0.149665539192759,-0.565895564522141  
"Phf24",170.512179744048,-0.421359658044161,0.425836969849314,-0.98948  
5854629444,0.322425487313939,0.46758290454795,-0.320308599180672  
"Slc2a6",207.417248766388,-1.1722042474971,0.505744906891082,-2.317777  
66127766,0.0204614077662814,0.0584723037706221,-3.32812473377607  
"Galt",2108.94908399637,0.962585484670808,0.197962069641794,4.86247434  
375978,1.15927408699533e-06,3.09213763997742e-05,9.99554814279413

"Sigmar1",1833.99150656248,-0.568856812793393,0.268227853603727,-2.12079694614344,0.0339388938127786,0.0864681238157007,-1.39254978416233  
"Slc17a3",13755.8710398271,2.16124960073171,0.835977323341944,2.58529692180141,0.00972951694732098,0.0330844299684103,7.36703530674413  
"Zranb3",286.988844935156,-0.0918270805776213,0.246041024659912,-0.373218574847623,0.708985772613936,0.807040959450437,-0.0196859682112312  
"Slain2",2429.8092863063,-0.111667229200536,0.0873745483149466,-1.27802925856652,0.201239110017537,0.333055410893401,-0.122772133562954  
"Hyal3",103.783965904896,0.525132503063883,0.285125877856162,1.84175672517805,0.0655107426428573,0.142606727704637,1.02278198298775  
"Arl5a",3849.45245213037,-0.177232293173356,0.199686279610049,-0.887553684306499,0.374780876719356,0.51989433090152,-0.115932906384761  
"Dgkb",185.192496349369,-0.169542775617129,0.321650178024146,-0.527103005689622,0.598122059599747,0.72019909331661,-0.0556486160833889  
"Slf2",1262.32185500767,-0.293162490082139,0.0946636054635768,-3.09688701002348,0.00195564399888825,0.0098200223256047,-1.35538748733605  
"Myrf",448.484293277344,-0.020927661679801,0.427334319206343,-0.0489725742567749,0.960941152278652,0.976364282810274,-0.00050057965604135  
"Vezt",1500.6417354691,0.0939200723666974,0.120257643480261,0.78099046055325,0.434808105362595,0.576923337077909,0.0516603494166526  
"Colec12",3614.99209463047,-1.33023323883513,0.302413254327353,-4.39872664243478,1.08887874479092e-05,0.000182867853281079,-11.4489806439162  
"Rab3gap1",2785.38694429235,0.101752378594976,0.116879128193431,0.870577836845078,0.383984702186424,0.528626260201292,0.0648644550171552  
"Prr5",1341.95193136175,0.669439748244681,0.238323822348116,2.80895019914056,0.00497033345483348,0.0198061642555372,2.6253834085964  
"Mbnl3",172.211485808842,0.188425058850596,0.3407436287498,0.552981898860249,0.580275805055169,0.704803939884488,0.0659177962127607  
"Slc17a2",11.2363335522618,1.04933307727108,0.643694121009896,1.63017346752333,0.103064839860674,0.20188449343012,1.6789954217352  
"Lmo1",310.623263923755,-2.12985815655182,0.64734290598636,-3.29015447123275,0.00100132396536607,0.00588066707129747,-10.939132691877  
"Metap2",8479.12398826817,0.628960144494735,0.257727828282939,2.4404044712015,0.0146708255541394,0.0454844580465273,1.94372874001446  
"Rpp25l",1113.88844447157,0.343609259278502,0.180255214501983,1.90623755450205,0.0566193918943894,0.127936597885827,0.706536391508876  
"Il5",2.29618086237511,-2.43916002536168,1.51000979544494,-1.61532728643191,0.106239837601039,0.206197924899966,-3.85123554946916  
"Rfxank",1100.80482020182,-0.0211557009457107,0.214040527162534,-0.0988396974449885,0.921265548793209,0.951522177686725,-0.0010512751077896  
"Slc9a3",2833.17991970501,2.35662053023785,0.833143316453945,2.8285896120108,0.00467536097584599,0.0188542271576101,9.35818286957078  
"Frmd7",3.84744425952953,-0.305831710611291,1.22099121417136,-0.250478223808391,0.802217542956123,0.874026024376205,-0.0411787496980856  
"Fam110c",394.806731131262,-0.747148797138443,0.362485783704615,-2.06118096412654,0.0392857788970143,0.0966066486232796,-1.74616721715174  
"Acaa1a",8170.6830212424,0.133729457087853,0.23603662047566,0.566562327567486,0.571011575942392,0.697525998317987,0.048171422234233  
"Hoxc9",883.944167322784,0.322398986726791,0.302183024932804,1.06689972674171,0.28601711826192,0.430139743298953,0.271990337865596

"Meox2",114.807518380628,-3.94233066926089,1.25055955604533,-3.1524533  
5594236,0.00161904686047578,0.00853514339801809,-18.7795409896503  
"Tm6sf2",157.491908015586,0.46327042027514,0.278802789252794,1.6616419  
8542177,0.09658457975126,0.192163891427558,0.764121321159677  
"Mgat5",1868.31890640625,-0.369092416709955,0.169645054123203,-2.17567  
449058612,0.0295796089593981,0.0778330925088184,-0.94236254502518  
"Prickle1",539.205292930988,-0.731961959814948,0.15881133572998,-4.609  
00323299007,4.0460404221052e-06,8.43740065777616e-05,-6.86598703927053  
"Surf6",901.174919292281,-0.132660707527278,0.143825512693567,-0.92237  
2568279479,0.35633427336306,0.501501780138079,-0.0915555381577254  
"Pphln1",983.475734112439,-0.376584512467822,0.171978887385996,-2.1897  
1362236227,0.0285450125120001,0.0757960852456731,-0.97147831805674  
"Ccfdc38",1.17055208076051,-1.77660983396541,1.69134737565043,-1.050410  
96793152,0.2935292051427,NA,NA  
"Sostdc1",3207.85396021707,1.86666433185225,0.482856143413363,3.865880  
87842601,0.000110688957738045,0.00107267062523678,12.7635111823443  
"Cd200r3",167.337246221544,-2.93199257684342,0.636048202860968,-4.6097  
0184909762,4.03246853805948e-06,8.43740065777616e-05,-27.5028268367031  
"Gatad2a",3518.79436949012,0.275956556878162,0.0726050505985078,3.8007  
9009109366,0.000144235450408967,0.00132264609837491,1.82907343013129  
"H1f2",4126.24445264929,0.0624806356378605,0.407032655496544,0.1535027  
59039418,0.878001814695877,0.923773558241121,0.00495398364586698  
"Sapcd1",25.6411711351213,0.314617728195539,0.485466965227227,0.648072  
373056897,0.516938141664579,0.650568636556894,0.135256827125234  
"Dipk1b",473.244984869151,-1.78774527714658,0.499816205113623,-3.57680  
535135945,0.00034781897064898,0.00259341273029209,-10.6456309193634  
"Ankmy2",1475.69971372339,0.00579825830288223,0.12631063038413,0.04590  
47531094479,0.963386165739358,0.978046740493088,0.00012870868353381  
"Rorb",37.2422647298412,0.959560642611245,0.351198591686709,2.73224513  
231315,0.0062904319360359,0.0237098089868216,3.59054776109315  
"Slc26a8",54.3437476196228,0.446315064608102,0.329067902249427,1.35630  
08168138,0.175003475718782,0.30122953181074,0.535525742929766  
"Gxylt1",1104.58686875248,-0.310505807257399,0.103186029325675,-3.0091  
8456971904,0.00261949927574226,0.012249915808011,-1.36691990962368  
"Arhgap36",148.521298846557,1.1365321555217,0.495050608830417,2.295789  
83491571,0.0216879009351528,0.0613155240548429,3.17288207331169  
"Ndufa13",10258.6273285256,1.22344614336771,0.258163804574029,4.739030  
49804523,2.14743185243011e-06,5.05683892013071e-05,12.1025542373281  
"Rif1",1316.33536724277,0.00802254623425788,0.120729525060676,0.066450  
5739604783,0.947019106947527,0.967309892988783,0.000266640286265877  
"Sh3bp4",1665.40437271331,-0.126614604869745,0.137338575974016,-0.9219  
15812595144,0.356572490436779,0.501682811558605,-0.0873371348454269  
"Nepro",295.063578602369,-0.315259361379467,0.160325155037584,-1.96637  
490420991,0.0492553201346741,0.115056934465781,-0.681694204530909  
"H1f6",1.85466682411972,0.0616752104778594,1.56003175177468,0.03953458  
66567768,0.968464178897641,0.98063536353065,0.00120603328503055  
"Znrd1as",438.51702648289,0.239081456426644,0.277186089898054,0.862530  
498967594,0.38839565732437,0.532667829113777,0.150587190825048  
"Leap2",1.54393976182988,0.868760160823238,1.29553487638655,0.67058029  
5951852,0.502487938372592,0.637386602247173,0.391271242641464



"Pdzn4",39.1467546744502,1.48061889901343,0.522365315503419,2.8344510  
1554361,0.00459044948635634,0.0185809807110185,5.9011795047581  
"Ska1",43.0754936981417,-0.378632726349065,0.518914519136065,-0.729663  
003030722,0.465596200959487,0.604407105613055,-0.190644338774135  
"Kctd1",1021.54662225696,0.491180844798495,0.167657984065811,2.9296597  
3279084,0.0033933335888767,0.014854786330471,2.0675929326301  
"Agr3",0.0778527997966676,0,4.78471990596551,0,1,NA,NA  
"Ube2r2",8533.03405242548,0.320497983199327,0.12766232580686,2.5105134  
2809003,0.0120555736995433,0.039091896889023,1.03900320562242  
"Armh4",421.481959959249,0.739534491462997,0.2789708256469,2.650938461  
92735,0.00802684649335949,0.0285663086450813,2.62943505517727  
"Gmip",1906.12443234959,-0.672191364656341,0.248757415883193,-2.702196  
28335413,0.00688830844454841,0.0254709345821743,-2.46708837359949  
"Rbm43",931.901845550971,-0.305475033153845,0.157424557939592,-1.94045  
349183107,0.0523246011037192,0.12035213782238,-0.646792475757642  
"Trpm8",0.231468339891574,-0.0623891562215573,4.78471990596593,-0.0130  
392494122312,0.989596479014976,NA,NA  
"Igfbp7",57546.2183722138,-0.135822259746413,0.316438869540436,-0.4292  
21163454628,0.667762282900451,0.775093998808965,-0.0346035686184228  
"Pnpla8",4291.28645408104,-0.06908497371823,0.36500830069122,-0.189269  
596300695,0.849881523257508,0.904351117044336,-0.00694563677590739  
"Fstl4",1.27173421292661,0.104023257794799,1.68488666838686,0.06173902  
36070848,0.950770662884819,NA,NA  
"Edc4",2405.25040045048,-0.0107615123768052,0.101425699744853,-0.10610  
2421811009,0.915501089666898,0.948362433280434,-0.000570559633552743  
"Lrrk2",2696.60354516324,1.20166243648002,0.318398137123788,3.77408752  
241798,0.000160594377574319,0.00143504545093679,7.86675374667101  
"9530068E07Rik",8884.10005252319,0.402815660507055,0.231733153891658,1  
.73827375902967,0.0821625878372153,0.169704040005299,0.714473855181726  
"MacroD1",1371.17392590716,0.513000343840037,0.446509693271198,1.14891  
19980391,0.250592269774349,0.390321782717707,0.48262241090998  
"Snapc4",1351.12421443234,0.177691768830063,0.200076660320497,0.888118  
426934073,0.374477051586615,0.519572586055349,0.116343464466097  
"Naa30",1590.70814915363,-0.154430766623363,0.215337729637826,-0.71715  
610117697,0.473277782769068,0.611042922025645,-0.0760707538144782  
"Noa1",909.92434962514,0.428184520406373,0.171332495958482,2.499143656  
37989,0.0124493833022456,0.0400293660335066,1.37795856462898  
"Ap5m1",1554.18298429644,0.677079415861857,0.115691685555342,5.8524466  
3531135,4.84393695291499e-09,4.67559815385824e-07,9.86893254254788  
"Gramd1c",369.790584456366,-0.111476167346232,0.123927708123546,-0.899  
525772195344,0.368372674595943,0.513381736306378,-0.074325127669415  
"Lrrn3",57.4400032421851,-0.87439863655495,0.374424324861753,-2.335314  
71780793,0.0195269858703271,0.0564032827548108,-2.51409537067135  
"Slc2a13",199.073450344206,0.07662821620262,0.231499081396691,0.331008  
726861044,0.740637893712518,0.831038594211122,0.0141822768534652  
"BC031181",3648.97598996044,0.0254449813281989,0.284938567153324,0.089  
2998851731682,0.928843585325028,0.956158187353751,0.00114074715549799  
"Zdhhc23",686.271418499608,0.698848576938173,0.280533253678633,2.49114  
344832269,0.0127332698666774,0.0406805334852493,2.23771705250375  
"Lzts1",63.8280741530207,-0.658876308822584,0.4183779193596,-1.5748352

8249079,0.115294470083283,0.219627594506204,-0.998739150953709  
"Skp1a",13013.9165061234,0.436140323982556,0.232731794501446,1.8740040  
4365397,0.0609298677766911,0.135124405092686,0.872960767662202  
"Znrd1",1021.57711108203,-0.0751258794827274,0.169765426873273,-0.4425  
27556207351,0.65810749429746,0.76718241266631,-0.0199106629045437  
"Srp72",4778.26103138459,0.314892327656022,0.198485676582109,1.5864738  
1049563,0.112631868506672,0.215768930255756,0.482902250918369  
"Qsox2",919.099614548239,-0.0933506712834928,0.107541638655173,-0.8680  
42113276858,0.385371278594421,0.529865582890687,-0.0592899912526369  
"Slc18a1",3898.931530425,2.11509632221535,0.733525566329377,2.88346639  
74965,0.00393324608051944,0.0165996606229368,8.66845371907592  
"Kidins220",7927.56035521652,0.875012375300717,0.183545493047161,4.767  
27791445081,1.86731649973592e-06,4.50605657324889e-05,8.75668903031267  
"Igsf10",507.674526135276,-1.66275285007074,0.350955709438652,-4.73778  
543945129,2.16066398482669e-06,5.08186084151396e-05,-16.4400497299497  
"Tmem260",1349.85827157175,-0.0258467859229727,0.0871751757695678,-0.2  
96492501389319,0.766853992703965,0.849455695360863,-0.0042171484872276  
4  
"Ubac1",1539.52019875379,0.292382666351164,0.195946361461071,1.4921566  
5027418,0.135658083648592,0.248059768824931,0.407606452723909  
"P2ry12",79.0285930667502,-1.06594112175206,0.427071208687986,-2.49593  
299681045,0.0125626328441064,0.0403070948155975,-3.42297973722815  
"Csgalnact1",539.895387673507,0.519253433203062,0.203175521960268,2.55  
568893434222,0.0105977810657457,0.0354860956929263,1.73358695291323  
"P2ry13",71.567772137677,-1.63776419210442,0.507799642488016,-3.225217  
30042981,0.00125877085624228,0.00701844842865653,-8.12202164754844  
"Rmdn2",216.978229963068,-0.390399992589524,0.234013656838451,-1.66827  
867169749,0.0952604198311962,0.190325613881408,-0.647680972651839  
"Serbp1",13905.7763075734,0.00805355440104437,0.0887843490363948,0.090  
7091676455613,0.927723685938379,0.955560297328395,0.000366093738609546  
"Tmem258",1408.91466187388,0.0483124820740763,0.281024554852747,0.1719  
15518554567,0.863503946183872,0.913989465430385,0.00434504266306497  
"Abt1",816.859732216187,0.00223438767738298,0.212934611505342,0.010493  
3043134086,0.991627708141529,0.994535108962683,1.22441722819756e-05  
"C530008M17Rik",33.0228081777164,-0.871321455500352,0.808612895228136,  
-1.07755077941779,0.281234277898957,0.425209828665777,-0.7451301625534  
69  
"P2ry14",289.177657597335,-0.218342719435729,0.385248340739764,-0.5667  
58364270853,0.570878361713458,0.69743021909079,-0.0786804134973194  
"Gadd45a",3714.68798615072,0.0835685215042693,0.293051456194878,0.2851  
66716416848,0.775516418567943,0.854826113926042,0.0131083248139437  
"Sec24a",1668.90518277722,0.427939110350665,0.154090124088265,2.777200  
11508028,0.00548294099493653,0.0212918509299487,1.64732201969011  
"Glb1l2",4113.71327732864,0.743596751668629,0.291465262719971,2.551236  
27676705,0.0107341527285777,0.0358520582398538,2.47495344665292  
"Ppp1r11",2463.40496669411,0.0575530377923962,0.164243025650315,0.3504  
13891637206,0.726028102471842,0.819664876286572,0.0114449803885961  
"Gng12",7862.03413329784,0.223188885293324,0.269704954559044,0.8275297  
93281806,0.407936842563071,0.551584861117042,0.13278836519593  
"Cep135",433.335597571582,-0.192659748327181,0.13882511254321,-1.38778

744564111,0.16520177881256,0.287971420785887,-0.239840971891806  
"9530077C05Rik",137.78310281299,0.300119228016295,0.307840450900987,0.  
97491810169166,0.329600886210539,0.474359571349341,0.22382581567898  
"Arsi",113.421260075756,-1.81017398598934,0.327471437302983,-5.5277309  
0959543,3.2439910778041e-08,1.94619501646229e-06,-23.8031260531785  
"Pcdh8",131.660469214653,0.430884547408208,0.542907604888242,0.7936609  
16753794,0.427392858742186,0.570422750342607,0.241888901123037  
"Gpi1",19252.6539269298,0.21913622711154,0.304660495294304,0.719280085  
525539,0.471968363574408,0.609836921999589,0.108376822964611  
"Tbcc",1010.81476789982,-0.0814498922251584,0.134489725239407,-0.60562  
1671694014,0.544766008027,0.674788617274026,-0.0320387872512943  
"Siah2",834.868946547648,0.764975366328668,0.175495868421858,4.3589366  
1319602,1.30695958021311e-05,0.000208877851598322,6.48221836316728  
"Exoc1",2138.76049681603,-0.0224509504677444,0.14368959604454,-0.15624  
6179861103,0.875838977432934,0.922438739371649,-0.00181256205003552  
"Npy1r",307.668159296475,-1.1127976577609,0.349669093518278,-3.1824306  
9916254,0.0014604446140467,0.00787890555054906,-5.38990920523141  
"Calm2",10646.1682161844,-0.365541087764568,0.229688548086664,-1.59146  
414050493,0.111505159422575,0.214102370413237,-0.56340884847134  
"Thap11",1094.89246255552,-0.119624646678468,0.177364725026087,-0.6744  
55682553981,0.500021652045851,0.635389870411235,-0.0542517509963844  
"Lum",934.853377667539,-2.14274068927179,0.517920833333372,-4.13719733  
087579,3.51573743493855e-05,0.000441971943948626,-16.5510950955964  
"Lcn8",1.28882851876916,-3.6619413469769,1.92896167854509,-1.898400257  
35446,0.0576433757526507,NA,NA  
"Hif1an",1955.61432040298,-0.212508242511055,0.173165586939142,-1.2271  
9673271884,0.219748657162836,0.355514380796629,-0.219773809696269  
"Arhgap26",1324.60436665865,-0.433045127669235,0.150458872158603,-2.87  
816279263843,0.00399998664068851,0.0167796341480517,-1.77011066537111  
"Wtip",2021.0610963721,0.103176881091771,0.273318292546702,0.377497166  
876018,0.705804169426978,0.804593644497616,0.0224325027198182  
"Elf1",2058.14685509848,-0.528815451762175,0.167381989935211,-3.159333  
0439366,0.00158130673170444,0.00837189478915665,-2.52925822577578  
"Megf11",55.6098359902529,-0.322599570859422,0.549645041248996,-0.5869  
23462688495,0.55725511176961,0.686379430794964,-0.121402186094071  
"March1",346.847729050946,-0.780969327511738,0.413229724008124,-1.8899  
1566225373,0.058769240493972,0.131493541437804,-1.58442865290156  
"Tbc1d24",833.636840515504,-0.0962515573397149,0.233389537628836,-0.41  
240733546842,0.6800408874467,0.784674945167225,-0.0233396291013748  
"Btg1",9027.91858933475,-1.0899094182048,0.198446855657981,-5.49219797  
205171,3.96962045367754e-08,2.26182406888254e-06,-14.1681019630423  
"Prss56",0.69248999686113,-2.20827163447719,2.93123731748519,-0.753358  
188129149,0.451234701152934,NA,NA  
"Rnf39",55.2411460444069,-0.769510438849277,0.300573077717644,-2.56014  
425740468,0.0104628722069818,0.0351551063745875,-2.57630971246192  
"Eea1",2935.07581046084,0.553387045594153,0.128439395114518,4.30854602  
749218,1.64331280808036e-05,0.000246471639476545,4.59768546086627  
"Akp3",0.0886915477092957,-0.544048378937457,4.78471990596623,-0.11370  
5376621746,0.90947135024012,NA,NA  
"Fam13b",1117.3669825136,-0.455433871610224,0.191780401400935,-2.37476

753768023,0.0175600053852962,0.0520262855192988,-1.34626534696856  
"Tmem255a",18.4150079911715,-2.14585720902858,0.6055980444357,-3.54336  
878849749,0.000395049839805505,0.00286985163059901,-12.5607643304664  
"Rnf13",4484.35534850773,0.175440568120474,0.201809774015978,0.8693363  
29104572,0.384663197660223,0.529262123825969,0.111627826714201  
"Phpt1",1435.74202910716,0.0958570571787665,0.229730713913535,0.417258  
343674694,0.67648945419774,0.782058068181402,0.023564184277152  
"Cdh8",0.53454226360782,3.23326752731758,2.45408559216297,1.3175039768  
9588,0.187669748907101,NA,NA  
"Commd2",995.919307695856,-0.0929419717333905,0.192854081070215,-0.481  
928985985791,0.629856394163898,0.745700405210254,-0.0272720892631658  
"Greb1",158.732321075729,-1.71965413562396,0.721530503961604,-2.383342  
25120366,0.0171562356751901,0.051148667155177,-5.11256415122605  
"Card11",466.095143977669,-1.42048769063509,0.543673579163866,-2.61275  
836287594,0.00898147782430507,0.0311381320445057,-4.92812933804183  
"Ppfibp2",1553.56616113985,-0.674445955396259,0.222838244598384,-3.026  
61671299644,0.00247307326481416,0.0117323558436366,-2.99818528563645  
"Sbf1",4089.30224903415,0.0491371341607814,0.171401701298622,0.2866782  
17243439,0.774358717948225,0.854177771133429,0.00774479578309857  
"Cdc42ep3",1226.57959824919,-0.535694865905596,0.184486186412122,-2.90  
371261027052,0.00368766491895873,0.0158069750173322,-2.22168944920519  
"Slc38a7",1086.51875037698,0.0677708313363575,0.165644738130296,0.4091  
33619946617,0.682441604988801,0.786285990397594,0.0162944593157275  
"Rnf113a1",130.256456704989,0.144541840002933,0.177599572636579,0.8138  
63670149188,0.415723055135232,0.559018491657018,0.0840615919819296  
"Adamts2",1909.40125947195,-1.45328103115577,0.380375164220082,-3.8206  
5173507204,0.000133099488762735,0.00124230437141973,-9.72359420836828  
"Cnot1",3544.75848956941,-0.295552323488269,0.187215523764602,-1.57867  
42335528,0.11441079784403,0.218355983660476,-0.449720866868318  
"Akap14",0.459239347958079,-0.0423581076203728,3.13525640273183,-0.013  
5102531274524,0.98922070553667,NA,NA  
"Ermdard",1317.95574573213,0.418383094811925,0.18164857637092,2.3032555  
6726413,0.0212644680231843,0.0603251269483554,1.17482247610784  
"Sh3tc1",2878.17404257732,0.624442559165783,0.191071622275016,3.268107  
27689851,0.00108269319162628,0.00625306630637711,3.16884824336979  
"Iqce",1583.69200601736,0.140513151263429,0.147824477246767,0.95054049  
1537593,0.341837689585748,0.486329899419402,0.101291445562659  
"Stpg4",0.853618365523545,0.210268708557129,2.34062948280169,0.0898342  
561700288,0.928418925747508,NA,NA  
"Lgi4",259.489288960921,-1.40937216105084,0.244423532838304,-5.7661066  
6200949,8.11237285095487e-09,6.81317024540035e-07,-20.0120109020045  
"Ppp6r2",1624.37064754272,-0.0146791034574819,0.134145058461493,-0.109  
427090537932,0.912863747621649,0.946353538447837,-0.000809391972988589  
"Ndr4",320.971959773677,-1.13427174786637,0.409661605782251,-2.768801  
69353549,0.00562628686119884,0.0217015511809407,-4.3446822193824  
"Ttyh3",2929.49076340234,-0.464749668396728,0.193749225540383,-2.39871  
755409861,0.0164525998670858,0.0495203445829637,-1.39674549734469  
"Bicral",1362.19680432698,-0.199955949097042,0.163242716818417,-1.2248  
9966470885,0.220613026780571,0.356498657066764,-0.206239526031663  
"Fxyd1",1638.33289294332,-1.90495656886522,0.394493305446231,-4.828869

19135531,1.37310566584402e-06,3.51349268669641e-05,-19.5378343550184  
"Upf3b",3621.72922171849,0.552032344207954,0.225024770490186,2.4532070  
0919026,0.0141588830872165,0.0443414555789509,1.72004183593227  
"Tex44",0.137986538933697,0,4.78471990596107,0,1,NA,NA  
"Fxyd7",47.7438350096643,-0.866496723093974,0.357190442090665,-2.42586  
760726938,0.0152718403290141,0.046765981375982,-2.65373220045395  
"Spg20",970.190742469448,-0.398884489716947,0.151570484234032,-2.63167  
655452661,0.00849647082189206,0.0297903593032281,-1.40150875648234  
"Fgf1",7012.45428071019,1.21134516517896,0.365644752112127,3.312901821  
18487,0.000923333860261572,0.00553000344180884,6.2960474636119  
"Grifin",0.649303034752547,-0.971279696681938,2.93816472895565,-0.3305  
73601646622,0.740966588979732,NA,NA  
"Fut7",34.0629543855653,-1.46383567649925,0.431112714757097,-3.3954824  
9539339,0.000685077543618444,0.00439107230291664,-7.94596620865526  
"Arhgap21",1620.83691719677,-0.204791192058678,0.197200748063934,-1.03  
84909492954,0.299041546755275,0.443433879278603,-0.166537544249421  
"H2-  
Aa",36602.611824198,-1.1854686273764,0.415589656727052,-2.852497910348  
58,0.00433770976234448,0.0178301974799365,-4.7737182968435  
"Cpz",62.2237519859889,-1.82567260510965,0.459584705979022,-3.97243986  
007008,7.11402004003356e-05,0.000760466900989991,-13.1112101611194  
"Ccdc113",17.1553812174037,-1.18846033285575,0.586657031445981,-2.0258  
179296453,0.0427834458767248,0.103203220054977,-2.69905904785094  
"Chst12",401.698791672496,-2.02598387175803,0.33918066201984,-5.973170  
34436214,2.32686711229761e-09,2.83557843472367e-07,-30.5434283476354  
"Alx1",367.143998376392,-0.858781100369413,0.622126915801291,-1.380395  
34789025,0.167464951772113,0.290992926624423,-1.06012775619373  
"Plxbn2",13393.2070952792,0.628740570525471,0.259891416333507,2.419243  
31090118,0.0155528332592725,0.0474123112709966,1.9169503711421  
"Eepd1",479.174948631538,-1.82477826345029,0.442374628077006,-4.124961  
39614192,3.70796945316277e-05,0.000460121546918555,-14.0216324364346  
"Eipr1",786.143353802013,0.376319282700331,0.249035107216044,1.5111093  
6488913,0.130760589104689,0.241094086653733,0.535339777114147  
"Rfxap",649.165914918104,0.132383936739429,0.190311259228581,0.6956179  
95887591,0.486668093124254,0.623582472217698,0.0625215243834786  
"Etl4",2469.39182462974,-0.715587018484318,0.184148022976397,-3.885933  
75545518,0.000101937303570503,0.00100534827770241,-4.93928304441817  
"Mgat4b",5533.94251604204,0.376712884497432,0.145673457568006,2.586009  
08351178,0.00970943717312864,0.0330334332580112,1.2846795018454  
"Atp13a2",2419.45036275428,-0.495260377835723,0.145075409739098,-3.413  
81340039909,0.000640604340936538,0.00417463350253363,-2.71339725016022  
"Alg5",1582.90524905665,0.352655138739462,0.164050421218856,2.14967530  
177197,0.0315809074055568,0.0817205749958257,0.883206976327046  
"Mag",98.3505172089168,-0.998353795184169,0.478378194932478,-2.0869550  
6141346,0.0368921969218461,0.0921265440038622,-2.38066664162202  
"Clcn7",3379.53238945634,0.480491325202913,0.161917949824984,2.9674988  
2099096,0.0030023343403189,0.0135476776134084,2.06685272237362  
"Nudt1",716.272779389124,0.215012983877951,0.272417122311921,0.7892785  
22778602,0.429949236541778,0.572697787545538,0.11984761857595  
"Ccdc148",496.815788441764,1.17053047416753,0.349346505389419,3.350628

83443684,0.000806282934544722,0.00498759665537849,6.20474924545245  
"Tbc1d9b",3371.84656568284,-0.336217264887336,0.113566331592049,-2.960  
53645630722,0.00307103773010819,0.0137638945726424,-1.4409285009716  
"Man1b1",3378.72567557405,-0.29398412052321,0.0809118937752296,-3.6333  
8573362141,0.000279726355486821,0.00218513801253287,-1.80096915002058  
"Colec11",74.9830331200053,-0.339340010205752,0.352193660594714,-0.963  
504026826443,0.335294644317377,0.479895775117426,-0.249138798014621  
"Olfr11",59.9339755991852,1.20666111972678,0.28038815284828,4.30353817  
545107,1.68091868132893e-05,0.000250953694093043,10.0035128411802  
"Dennd3",1985.90823959706,0.656299527066303,0.230842885203607,2.843057  
20095049,0.00446830502618246,0.0182029068242648,2.62925008975399  
"Tcaf1",2050.56241655147,-0.603392307690181,0.152579247310172,-3.95461  
583621243,7.66577250764128e-05,0.000804019539289885,-4.29970539311235  
"Cenpt",760.300070143485,-0.53090474960244,0.24710474276718,-2.1485008  
4889975,0.0316739890267065,0.0819288190558135,-1.32827296564121  
"Tmtc3",950.151314635691,-0.122955465405871,0.26147996653667,-0.470229  
008495102,0.638191411103223,0.752370526252533,-0.0349840704360215  
"Aaas",802.676939965489,0.277674778968065,0.244027575508084,1.13788279  
209809,0.255169427600266,0.395932953951137,0.257268567828757  
"Cc2d1a",1736.50417949826,0.417602802697234,0.210521329490416,1.983660  
29564831,0.0472937225852175,0.111570841254273,0.915842845029678  
"Tmem184a",1290.76962392763,0.180275331902816,0.343143615492651,0.5253  
64085949829,0.599330114765043,0.721152069689338,0.0589329522592387  
"Nop14",1154.50161254299,0.0375098128724043,0.108361944153915,0.346153  
007545954,0.729227728618876,0.822272521346108,0.0073400478807934  
"Ago2",3110.49724509718,-0.0400098575302051,0.16500645765622,-0.242474  
495231957,0.808412517138708,0.877981551658296,-0.00520647065128126  
"Zcchc12",26.796567067845,0.427843299695657,0.452477287080454,0.945557  
516171156,0.344374321699084,0.488878353121086,0.306182458015043  
"Cab39",4832.46457344413,-0.133959830264643,0.140701750611878,-0.95208  
3607219419,0.341054581950408,0.485641001889218,-0.0967572573538067  
"Cyl d",2317.99287413278,-0.217395303750476,0.128427889667546,-1.692742  
16303978,0.0905045559562723,0.182828204728077,-0.369399913001122  
"Micall2",592.457923594065,-1.06730010452843,0.241408525801819,-4.4211  
3674727719,9.81830107443917e-06,0.00016837047875938,-9.27413752019789  
"Zscan12",390.725348920056,-0.0431626177066367,0.15791122020518,-0.273  
334710798598,0.784595935489994,0.860795158124235,-0.00647002090635381  
"Cysrt1",18.8040532569372,0.150472257983093,0.551592879721696,0.272795  
867232756,0.785010136591602,0.861018238024753,0.0225166073526833  
"Rbm42",3235.22160692664,0.157685655648383,0.132017731135329,1.1944278  
5671526,0.232310645474367,0.369491213261853,0.156996304256171  
"Oxsr1",2634.60937099531,-0.0705260451578035,0.137897477493168,-0.5114  
38254273345,0.609044214017923,0.728938928544685,-0.0222978899720512  
"Psm a8",13.898129975506,-0.372816581459477,0.49262965051615,-0.7567887  
58185506,0.449176428925788,0.58996578047794,-0.196731858856042  
"Olfr701",0.515827883234203,1.00675794881321,2.42265072492316,0.415560  
500924103,0.677731635090907,NA,NA  
"Ttll7",219.12595425823,-1.09442576422169,0.254368810630961,-4.3025155  
5411596,1.6886981188932e-05,0.000251922233528536,-9.06883883445335  
"Cuedc2",2960.25541677987,0.0102898086398108,0.122527610974371,0.08397

95092549634,0.933072723454427,0.958336070475897,0.000437900898971302  
"Pramel5",0.123716792206209,0,4.78471990596188,0,1,NA,NA  
"Cox6b1",20313.3196223679,0.770332314368483,0.328919801155089,2.342006  
50633758,0.0191803805531014,0.0556433655742257,2.22533015475967  
"Tubb4b",8686.41349188599,-0.0678530796051953,0.241542748378635,-0.280  
915407565168,0.778775282781283,0.856964866170182,-0.0104736899209094  
"Kcnk9",0.305082769878068,1.37468936562649,3.88110971207208,0.35420007  
8743087,0.72318894458264,NA,NA  
"Dnajc12",5827.31384440638,2.39141928271244,0.657610723618649,3.636527  
19887705,0.000276338476609966,0.0021664847675678,14.6705187427767  
"Dner",5.1267237722637,-0.652187333422093,1.02687284990205,-0.63511985  
2944115,0.525350249869977,0.65797014208407,-0.27300282996854  
"Kif15",140.71241192193,-0.87948493573833,0.476079279985835,-1.8473497  
4343873,0.0646964679079208,0.141284954481049,-1.72113132866862  
"Wdr44",393.276238274475,-0.509521649480864,0.161773830612109,-3.14959  
25364008,0.00163498320475284,0.00860661515288093,-2.42288966151916  
"Stpg3",18.2372910597766,1.76146834702077,0.642110245079051,2.74324909  
237963,0.00608345191230394,0.023094849179537,6.63746931684531  
"Decr2",2163.96433633799,0.613444527762321,0.215324536845111,2.8489299  
7681722,0.00438665339577442,0.01797222921442,2.46538910313298  
"Anln",197.82950610002,-0.921308963894584,0.323918633275323,-2.8442604  
6929969,0.00445146416667185,0.0181616757316944,-3.69301320873702  
"Tent4b",2374.14727615626,0.20077784308226,0.092080024005949,2.1804712  
2869221,0.0292225492752065,0.0770712490629429,0.514598625736571  
"Rps27l",6112.88497102702,0.970116267206104,0.230577475665715,4.207333  
19421257,2.584020081617e-05,0.000349156088367071,7.72211723237817  
"Klhl13",437.373882331034,-1.33027661480973,0.193100726253549,-6.88902  
957859942,5.61742596977952e-12,2.60782313235145e-09,-26.2925847392311  
"Slitrk2",11.4419751626107,-1.28609205672488,0.570912364734783,-2.2526  
9609867766,0.0242783171079549,0.0668519456250396,-3.47923252351808  
"Mbd5",743.907200867357,0.457948669168483,0.197622809885933,2.31728649  
862235,0.0204881302839135,0.0585143641827662,1.29987951839761  
"Fam135b",25.2727396959824,1.28236363232514,0.511160408692586,2.508730  
35258167,0.0121165937983792,0.039250597421631,4.15202236766832  
"Noxa1",2.36284582984023,-1.63458610871876,1.50702505120857,-1.0846442  
8471703,0.278079233138319,0.421705322778381,-1.41138091734736  
"Cnep1r1",1701.85699133302,0.0180946531591309,0.0880587395341122,0.205  
483899211632,0.837194076275816,0.896212259757652,0.00198277584980319  
"Entpd8",423.490668545347,1.63606501981512,0.599836340805483,2.7275190  
0563102,0.00638125814235492,0.0239779863672454,6.10353541871656  
"Slc6a20a",709.391251977318,1.41013428024887,0.583929956500043,2.41490  
313102092,0.0157393949645003,0.0478463865010645,4.28646933011344  
"Dpp10",248.519802697418,0.229260624126931,0.39126627216918,0.58594527  
6744428,0.5579122897387,0.686782595104151,0.086141811991406  
"Atoh7",21.0690253871444,1.77477086430769,0.408639496210976,4.34312121  
261866,1.40472577577341e-05,0.000221596627637783,14.9340788859996  
"Sun1",2426.50976214834,-0.447125868985015,0.15829299653247,-2.8246724  
6675249,0.00473289692855124,0.0190389982077351,-1.77118444267991  
"Jmjd4",461.225978869927,0.193195352155794,0.133865735489102,1.4432024  
1060881,0.14896346067364,0.26658922039602,0.25541320159179

"Amdhd2",2735.1553556102,1.27600704012098,0.320836155159407,3.97712982  
031901,6.97520887020468e-05,0.000749325744084026,9.18257637352667  
"Topors",1774.74831427302,0.341364727538097,0.127198092954109,2.683725  
20066992,0.00728069224095984,0.0265686007678965,1.23847982799412  
"Ssx2ip",1359.44382971559,0.546640413474418,0.179078387045977,3.052520  
30963442,0.002269283741609,0.0110175533849334,2.46440012560544  
"Igflr1",238.278663231967,0.548462656321,0.696360924236085,0.787612626  
200514,0.430923326963191,0.57330895304314,0.305126516167667  
"Lpar3",506.798680272484,1.55340802238902,0.548201537130523,2.83364404  
72606,0.00460205616291789,0.0186163674407828,6.18833346557252  
"Pnp1a7",1117.98724605594,0.22177126876747,0.2088930222288,1.061649960  
35418,0.28839462394647,0.432447771876357,0.185909461566958  
"Plch1",169.590391410823,0.334055314271521,0.392204251252532,0.8517381  
26766071,0.394359454281196,0.538718941764175,0.206633685433487  
"Psenen",3959.45149384752,0.426679749522424,0.133567802255104,3.194480  
57330089,0.00140082712784264,0.00762516117774309,2.08061923857621  
"Siah1a",1003.02506525712,-0.0981926999311445,0.144046446153622,-0.681  
673880565053,0.495445186939161,0.631384983982991,-0.045152880590621  
"Lin37",700.474865855439,0.164122825643251,0.217468391128998,0.7546973  
8287573,0.450430577188925,0.591055615723108,0.0863031937669057  
"Mrpl41",1224.61939751903,0.308750825826423,0.255183766901574,1.209915  
62110419,0.22631127243685,0.362469950476403,0.313324568972654  
"Mcoln3",434.405655176743,1.68265815681387,0.551297050927762,3.0521805  
8754745,0.00227185376486773,0.011024540743502,7.5848029356754  
"Hspb6",326.370338208753,-0.506772216882406,0.431522599308552,-1.17438  
163770433,0.240242196824435,0.378616420439931,-0.492193226346972  
"Gjd4",0.456791483589828,0.408162662505849,2.67472826204411,0.15259967  
4627851,0.878713981603504,NA,NA  
"Wnt4",2303.22989030309,-1.12979450272629,0.524730084430278,-2.1530964  
8950841,0.0313110961011635,0.0812199226058974,-2.83645610150133  
"Ptcra",9.66529598302485,0.778083122905326,0.556975878541745,1.3969781  
329534,0.162420146945634,0.284534413759746,0.977973510104013  
"Mrpl55",1240.11986746201,0.216115851626083,0.253415543592459,0.852812  
138365273,0.393763491475587,0.538212447023555,0.133884183689779  
"Dchs1",637.088174277296,-0.847550855929841,0.245348801471317,-3.45447  
318612202,0.000551369041057831,0.00373025453245857,-4.73889313979296  
"Syde2",634.927675564232,0.36313241602498,0.177834945572498,2.04196320  
838944,0.0411551809903732,0.1000374783652,0.836007217325917  
"Proser3",526.933315275199,-0.0578573101190709,0.257380139756685,-0.22  
4793218986385,0.822140141551233,0.885933927266825,-0.00700726692418672  
"Smad6",697.832574548263,-0.760177149212788,0.209059972298959,-3.63616  
784625669,0.000276724059610301,0.00216776444928953,-4.66297136981745  
"Abcc12",2.2333942924898,-1.82365364715614,1.31055860078596,-1.3915086  
6360533,0.164071234339589,0.286672012693437,-2.27850301110607  
"2410004B18Rik",941.144696149948,0.0595211449573112,0.140719733009055,  
0.422976534168673,0.67231238186487,0.778475373929642,0.014905161371323  
"Dna2",607.652528673834,0.184912476460342,0.304411545473872,0.60744238  
9126509,0.543557364564679,0.673933708144608,0.0729708139754188  
"Phkb",2834.20336344878,0.132845866041164,0.23095278016043,0.575207910  
244178,0.565150693640297,0.692695283132211,0.0487763634805733



"Acaa2",8268.60527955829,0.040528161424967,0.51702281408107,0.07838756  
8829046,0.937519761740715,0.961159922940607,0.00160550166764779  
"Arhgap33",368.750078673194,-0.378007254245947,0.275419171444289,-1.37  
247981781257,0.169914117470782,0.294412485406923,-0.462217247008315  
"Arhgef26",218.103713278279,-0.0175429346818881,0.231238459210733,-0.0  
758651252986459,0.939526402848817,0.962511041050371,-0.000670311002237  
881  
"C1qa",7472.26699434531,-1.29097005521701,0.411008938139848,-3.1409780  
5526981,0.00168384648829595,0.00881283135234201,-6.10828486093526  
"Gtdc1",474.874767513097,-0.0545741478789663,0.177564451934929,-0.3073  
48386933696,0.758578209310799,0.843396138936481,-0.009294987859852  
"Prodh2",2443.36925703796,2.47845497996629,1.00605252333372,2.46354432  
048291,0.0137570885993865,0.0433296469393389,7.7796674232912  
"Ehmt1",2122.91149736494,-0.203483159967256,0.175444274238715,-1.15981  
647648637,0.246123534329235,0.385238554415303,-0.194101063164904  
"Rap2b",867.655413649055,-1.09405934710992,0.172812925903743,-6.330888  
39499954,2.43753614599355e-10,5.05607231644491e-08,-18.3802963546571  
"C1qc",4831.59835444531,-1.43858282295657,0.402452854311135,-3.5745375  
080491,0.000350847516725542,0.0026100056776477,-8.55727021051071  
"Zfp157",954.683481441884,0.414549027101874,0.228765385019676,1.812114  
30683107,0.0699685361997181,0.15003260957023,0.786359132053898  
"Trpv5",448.326204626088,1.43819778722484,0.673330561159002,2.13594610  
164325,0.0326838072839509,0.083994843076641,3.56241573769717  
"Neto2",51.9781243402913,-1.31161587748136,0.370221152765725,-3.542790  
21520779,0.000395917519939101,0.00287367809100517,-7.67578925903274  
"Fzd8",811.115706510688,-0.0940468641184631,0.145947157685708,-0.64438  
9829920425,0.519322677729112,0.652684902047327,-0.0401261107659732  
"C1qb",6374.81889905472,-1.40370504402652,0.40022257704832,-3.50731099  
274552,0.000452659791220196,0.00319897086234555,-8.06418178121493  
"C1ql2",1.18035068235469,-2.18448575237375,3.35155470673692,-0.6517828  
12311772,0.514541291017338,NA,NA  
"Unc93b1",6024.11740504607,-1.05727410794203,0.286951644091679,-3.6845  
02701801,0.000229149595257937,0.00188441957331896,-6.63348093368894  
"Piwil4",14.7535155907715,-1.69382982529282,0.495614646321424,-3.41763  
472460882,0.000631678219281837,0.00412947725666933,-9.29845575029004  
"Trim67",66.6851519907196,-3.12110753694377,0.885214125250273,-3.52582  
211231813,0.000422170434866302,0.00302072628954978,-18.1094711229099  
"Kirrel2",18.0949553629331,-0.725543215423498,0.697472654555285,-1.040  
24610955696,0.298225574269047,0.442594173169271,-0.591391737917485  
"Zfp280c",617.99181213712,-0.00127384678918021,0.156663829980745,-0.00  
813108417773758,0.993512404959456,0.99595846332689,-5.15873014906294e-  
06  
"Ttc7",2164.47224136672,0.416044754321598,0.192421011381073,2.16215865  
06354,0.0306059495218572,0.0798547843941084,1.05157204194312  
"Stox1",46.0932140235481,0.529538942811961,0.371623544941222,1.4249337  
8048938,0.154176343747258,0.273832241791222,0.685879817122667  
"Muc12",3.20100735668892,0.276465168337857,1.56336563146664,0.17683973  
7789615,0.859634274681831,0.911029575198301,0.0257610016344488  
"Stag3",58.6517244176982,-0.0519357838351611,0.560440624147538,-0.0926  
695560553956,0.92616608365517,0.954712466249458,-0.00240696734503401

"Nfkbid",340.533863534364,-0.852081779354867,0.389902903986488,-2.18536915381476,0.0288617906594685,0.0763771979205098,-2.19161490579203  
"Aifm1",4612.95346171914,1.00664761398956,0.287785638180163,3.49790774951515,0.000468923300299444,0.00327943562024339,5.75810884840055  
"4921524J17Rik",616.393222479499,0.115839854720038,0.17702067452734,0.654386020329775,0.512863138669006,0.646943486948844,0.0504478321298415  
"Try5",0.552698706968563,3.12945375516367,4.27488740797788,0.732055246489866,0.464134848107489,NA,NA  
"Kdm1a",2092.43527560608,-0.184327398861236,0.107879906977392,-1.708635129801,0.0875185571598176,0.178143525159424,-0.317995312071089  
"Elac1",890.510574367175,-0.514812678775415,0.183684482362484,-2.80270098025744,0.00506766303634972,0.0201036203220238,-2.0112986758442  
"Rab8b",1692.5347023949,-1.00114016432287,0.220515133501374,-4.54000661281884,5.62524639521069e-06,0.000108380488353575,-9.14027202537288  
"Tmem71",179.990509409955,-0.58588250938285,0.232573975392106,-2.51912325269878,0.0117647466740063,0.0384622787809818,-1.90885049837059  
"Map11",3423.34285846838,-0.0656574677623897,0.248699696261738,-0.264003007439503,0.791777601343213,0.865994259886126,-0.00944659940709108  
"Slc39a12",4.75716433419747,-2.1761652090293,0.90784788821366,-2.39705928413984,0.0165272494473078,0.0497066650815376,-6.53201285106609  
"Aadacl2fm1",0.268837707829504,-0.550629761653143,4.78471990596552,-0.115080876723134,0.908381017352687,NA,NA  
"Kif1bp",1769.41460513652,-0.00171456199471287,0.136939393262121,-0.0125205899768444,0.990010275572828,0.993321687496475,-1.14887865036793e-05  
"Lrfrn3",320.039509148101,-0.595584379448902,0.20182789286877,-2.95095177868281,0.00316796371429983,0.0140702147090533,-2.53939022882824  
"Cst11",0.125558793514292,-1.03498639904526,4.78089210794988,-0.216483948115925,0.828610536062342,NA,NA  
"Bcorl1",683.341087441146,-0.110282013918996,0.194055631726549,-0.568301022432568,0.56983058488716,0.696803235571382,-0.0398396212495572  
"Clca2",30.3035319155419,-1.33773172273407,0.643817400413456,-2.07781231429127,0.0377266491833556,0.0937659918135204,-3.16634818031677  
"Wnt8b",10.0718141042005,0.706232903552985,0.723011381612463,0.976793618349329,0.32867133605835,0.473387990750906,0.528149179496167  
"Cfap221",5.51063143457245,-3.34586194510308,1.45964581797334,-2.29224233982232,0.0218916630080441,0.0618076520896096,-9.31396992187323  
"Trim17",27.3876715557573,0.371701252282173,0.400125281347059,0.928962176623297,0.352908688359747,0.497902576384829,0.259206184539058  
"Spryd3",1215.24848027178,-0.404381633364735,0.135150655442977,-2.99208044562797,0.00277083237649512,0.0127497809488113,-1.76401021673868  
"Cnpy4",1108.92584356059,-0.595281261740212,0.135394428350273,-4.39664518690669,1.09936834324796e-05,0.000184470602036564,-5.11824045940506  
"Zic4",0.222382911859068,0.183244500456612,4.78471990596545,0.0382978531780194,0.969450202447996,NA,NA  
"Tmem177",582.802582435601,0.0979137221355963,0.28264265649945,0.346422310589155,0.729025360507309,0.822165261160119,0.0191728635349823  
"Anapc10",417.35888923831,0.240206854253756,0.220153421571031,1.09108844432043,0.27523396707161,0.418604671603919,0.209178928691796  
"Taf6",1218.98232908953,-0.152644803660336,0.165182231643482,-0.924099

415182825,0.355434557769604,0.500488409575485,-0.105656281694365  
"Tfb1m",366.752388157548,0.183163776683988,0.114426971718538,1.6007045  
7107372,0.109442368257147,0.211063092693518,0.284929236314089  
"Zdhhc9",2162.01602315195,0.462038790279113,0.211228190451155,2.187391  
69848617,0.0287139416800187,0.0761278324574352,1.18990759990676  
"Pml",2267.93180696361,-0.369038694720532,0.20090527929671,-1.83687903  
081686,0.0662277555211875,0.143782293414109,-0.715733932331569  
"Trim3",2117.25755986857,-0.204758632309055,0.177150297436748,-1.15584  
695748063,0.247743761970457,0.387060076347524,-0.194351848936404  
"Otud4",3043.22742638093,-0.253115349479249,0.0841536665977043,-3.0077  
7565271474,0.00263167336217282,0.0122845025653928,-1.11355991198956  
"Nxt1",516.921818447219,-0.0659734105070594,0.173987440174855,-0.37918  
490231684,0.704550562132398,0.803759675923176,-0.0144122190851731  
"Asap3",823.700718818969,-0.113983138164814,0.195105114554771,-0.58421  
3993697313,0.559076347830142,0.687686419683884,-0.0426778322058582  
"Zfp39",238.554480988487,-0.200767263031412,0.224794477508862,-0.89311  
4747552006,0.371795726132622,0.516992801892302,-0.132451449103772  
"Tns2",5936.55728065416,0.338218793612441,0.165572244808188,2.04272638  
813504,0.0410795310866321,0.0999711304452261,0.778875208699469  
"Xnppep2",281.55447967436,1.49223056474081,0.262569810735727,5.6831764  
4956798,1.3221573235605e-08,9.87717375279031e-07,20.6343691214824  
"Zfp113",1005.83497752303,0.488880620737275,0.16211269681267,3.0156837  
2095001,0.00256400554881481,0.0120610326153899,2.15976481316267  
"Apln",390.959399755703,-0.456631072716411,0.389905277369194,-1.171133  
34755927,0.241545181442164,0.380086187374652,-0.441725375615961  
"Hk1",4099.26563130662,0.137913585567172,0.184118225037695,0.749049071  
806645,0.453827629095458,0.594153703894665,0.0718001892182543  
"Ss18",3046.66513985916,-0.381306145604451,0.0738800207203966,-5.16115  
374476582,2.45432505557187e-07,9.08745933807127e-06,-4.42643631375347  
"Sstr4",3.51111046649254,-4.07660561536512,1.4053546075665,-2.90076653  
494888,0.00372251108881658,0.0159100221853892,-16.8804331637822  
"Frem2",367.880354838496,0.780977918318037,0.368276206123182,2.1206309  
4311559,0.0339528720391827,0.0864811363840606,1.9117003697274  
"Zscan21",1406.67558048884,0.0381542666433758,0.0945296020744447,0.403  
622418862276,0.686490397233744,0.789593544435084,0.00901344821609273  
"Wdr62",188.694813507205,-0.52286327953499,0.308877020693823,-1.692787  
88807434,0.0904958489512062,0.182828204728077,-0.888453644764088  
"Mmaa",1843.84404662333,0.57378390102005,0.302207704343893,1.898640877  
6896,0.0576117099030843,0.129655709976868,1.17216748229581  
"Fxa2",3.60866268131917,0.691898425352165,0.91216000760395,0.75852747  
2794641,0.448135272759983,0.588836279282576,0.366434317048239  
"Zfp146",986.340867193572,-0.934183552676518,0.168782879750786,-5.5348  
2411282396,3.115408283037e-08,1.89893484184692e-06,-12.3071372504742  
"Tspan15",2050.46124731106,-0.840555098184102,0.208200387308731,-4.037  
24079983425,5.40835479605045e-05,0.000613807344664678,-6.2166021494622  
9  
"Apbb1",722.475191648278,0.193842816389259,0.229210002688946,0.8456996  
38389329,0.397720324934756,0.542209017230218,0.118651907308415  
"Clca3b",43.8382449965782,-0.405583271846792,0.695238822245659,-0.5833  
72589201415,0.559642506196811,0.688155007378132,-0.151583164526009

"Pax1",4.43250565718496,-1.02892942723945,0.996453854282777,-1.03259114590916,0.301795273426978,0.446600200461385,-0.829411255844022  
"Inhbb",585.309048516618,-1.58540166903505,0.31150772599285,-5.08944574001172,3.59111593188645e-07,1.23149697732448e-05,-17.9224822905897  
"Smpd1",2964.98649439092,0.484051983765456,0.185390095792116,2.61099160501131,0.00902801099328488,0.0312494511533941,1.67760484048126  
"Azgp1",1510.69867844078,2.03220505276442,0.718376625649962,2.82888526742605,0.0046710441276144,0.0188407154324008,8.07138000928667  
"Paip2",5925.6530089471,0.279399714466724,0.139888844682657,1.99729803402517,0.0457928168058722,0.108595030659316,0.620303584905285  
"Cavin3",1651.77824464317,-1.14934722241857,0.164672690032148,-6.97958612441557,2.96050900415518e-12,1.56010823143291e-09,-23.3070498776831  
"Sh3glb1",8696.98127073707,-1.13692101304202,0.42635803547778,-2.66658751199089,0.00766256541675163,0.0275586731090608,-4.08318130596542  
"Rbmxl1",1306.17007240697,-0.631630680557432,0.129502471808935,-4.87736389687857,1.07512982353297e-06,2.94422490157946e-05,-6.58985334101216  
"Scd1",232890.366069334,-3.94761829629614,1.22334694327979,-3.22690003680606,0.00125139170198079,0.00698529499147478,-19.5957721638932  
"Selenof",11451.537528026,-0.001470818017135,0.287440085668025,-0.00511695511680893,0.995917278330458,0.997247393347871,-4.05416578323263e-06  
"Rnf139",1534.88269454691,0.0752330350588589,0.150670716987156,0.499320880415484,0.617553347528131,0.736185813774976,0.0230418268643018  
"Trmt12",433.255534767191,-0.113999098424969,0.1930212087713,-0.59060400227853,0.554785782602724,0.684373857344547,-0.0432342647366173  
"Prr32",3.2472465166765,-2.99276846414269,2.05579864866917,-1.45576925351131,0.145456418020946,0.261827428166638,-4.01051822825772  
"Slc35b2",2249.39898392312,0.181762498259806,0.138046927844173,1.31667180935008,0.187948656970921,0.3168444504253,0.208907694636485  
"Lrg1",785.381294621374,-2.08051890369154,0.428519973355118,-4.85512702570669,1.20309597266968e-06,3.17858608063866e-05,-21.5468711316037  
"Gm9762",1.80484953226189,-2.86569345512935,2.33981907117777,-1.22475002038807,0.220669421300194,0.35650929594402,-2.9556617976685  
"Rab11fip3",12523.8435947626,1.3714981369542,0.442970788174948,3.09613675114969,0.00196059918262165,0.00983983600070963,6.33812660610063  
"Ttc29",4.48367269189266,2.46383778928379,1.10549029640096,2.22872855357037,0.0258319712142505,0.0702569081790286,6.5429593511176  
"Dcaf15",1350.43987943428,0.334385930441802,0.166493589345245,2.00840123488725,0.0446006717892257,0.10651934083125,0.748833451604636  
"Socs5",1387.80380638596,-0.305701947432798,0.0933712831428129,-3.27404676409151,0.00106019064366148,0.00616287575524763,-1.5557819480667  
"Fer1l6",31.3573679166854,-2.09371243665582,0.855089151008099,-2.44853116682332,0.0143440019603228,0.0447916960638011,-6.50251078626471  
"Zcwpw1",329.121702621531,0.0110914258531478,0.186131401249107,0.0595892244871873,0.952482800732,0.970298309753006,0.000334425554927112  
"Ralgapa2",2139.34717403022,-0.465996398738949,0.348385034766144,-1.33759017247039,0.181030069786974,0.308813632286264,-0.547553837619256  
"Setd7",2774.32344694336,-0.83419280765835,0.142873711220829,-5.83867249286332,5.26183875482198e-09,4.9562962338898e-07,-12.1103414611273  
"Sik2",1361.56061526224,-1.42850730440538,0.547555103417482,-2.6088831

8908831,0.00908382446744876,0.0313805086412365,-4.94487563370218  
"Fam91a1",3730.9339265139,-0.102518820823028,0.13987232958573,-0.73294  
5687875978,0.463591555827447,0.602567039232289,-0.0519315598230594  
"Trim58",0.349667120864793,-1.23983330955007,3.89913701178303,-0.31797  
6338303411,0.750502885434933,NA,NA  
"Psd",205.202334553902,-0.616468375432668,0.280136185422492,-2.2006024  
4806622,0.0277641801429639,0.0741030266320207,-1.60423497667741  
"Tmprss13",356.776763799099,-3.0059179302069,0.677014763143204,-4.4399  
5920598719,8.99759316030137e-06,0.000157623604168514,-26.3177151153417  
"Prmt9",894.816117784007,0.305705278529246,0.0953765806758859,3.205244  
68756236,0.00134947707573982,0.00740977302809772,1.49947077832231  
"Aff3",175.066773495242,-1.57303506680959,0.31812184032685,-4.94475659  
135315,7.62390630475226e-07,2.22198692272137e-05,-16.8543214399788  
"Myom3",112.660470068361,0.777408843046581,0.515225420522912,1.5088712  
8639261,0.131331678916208,0.24184974268117,1.10348415375432  
"Tas2r108",2.14734938374968,2.81524492882498,1.10121654924432,2.556486  
21586452,0.0105735260169854,0.0354292164081769,9.40353312845356  
"Cfap61",13.294798913348,0.135375204345916,0.588658159185555,0.2299725  
26896112,0.818113117955809,0.883303038590307,0.0167982955622439  
"2210407C18Rik",0.0880002295447563,1.38055633636101,4.78471990596623,0  
.288534410267056,0.772937694360212,NA,NA  
"Arhgap10",1840.91394676338,0.653582890244733,0.160831677362411,4.0637  
6965634686,4.82864791117684e-05,0.000563912898686245,4.8891991969677  
"Ddx1",4192.66085272783,0.0451155690480488,0.152690767873714,0.2954701  
82489111,0.767634727004482,0.849837719005984,0.00734074821875552  
"Lrrc20",363.859801333443,-0.67926778515549,0.164431183640684,-4.13101  
560248954,3.61164064939892e-05,0.000451747998841715,-5.23198271822934  
"Ndufc1",2870.7546777024,1.00663689762767,0.339620176784485,2.96400793  
132634,0.00303660460168584,0.0136580660954257,4.32192003139315  
"Il22ra1",19.3744683177794,0.43168711120389,0.599965664025232,0.719519  
694356601,0.471820772082374,0.609686620323555,0.213603181945928  
"Wee2",0.354476896458541,-0.0630224514913308,4.78471990595938,-0.01317  
16072685543,0.989490881793662,NA,NA  
"Mgarp",15.8957155774964,-1.30006041155476,0.669949368284904,-1.940535  
31968089,0.0523146660724161,0.12035213782238,-2.75266126839413  
"Ppp1r14a",433.910447138216,-0.840587093262323,0.220600746309319,-3.81  
044537394122,0.000138716661999894,0.0012830633186309,-5.59705323107624  
"Spaca5",0.087583724926668,0,4.78471990595887,0,1,NA,NA  
"Mycn",267.168911533131,-0.438548007599796,0.435410010343056,-1.007206  
99382696,0.313835312861776,0.45899054235077,-0.341508592814489  
"Nodal",2.39324739529101,-0.189668073737718,0.927702182954448,-0.20444  
9312745696,0.83800239789744,0.89643774368817,-0.0207357337825725  
"E330009J07Rik",909.124926487904,-0.0747232761008584,0.321782566937697  
, -0.232216669821415,0.816369730961062,0.882692059184005,-0.00932388692  
965917  
"Elf2",1922.22342601603,-0.567952276491293,0.125697920436199,-4.518390  
3959618,6.23115148097517e-06,0.00011761373821496,-5.13889166670789  
"Krt80",518.6125497078,-0.394578216223742,0.387178157420974,-1.0191128  
002986,0.30814941792685,0.453011939285058,-0.312441551219701  
"Grhl3",311.460222437361,-2.4315357168778,0.664880225280502,-3.6571033

7655475,0.00025508152465366,0.00203751723379642,-15.0658518461168  
"Cyb561d2",840.688008815962,0.825263934242101,0.236098265721172,3.4954  
2565135452,0.000473306294228259,0.00330653032062436,4.71378865608365  
"Pacrg",109.175787767788,1.24050340555438,0.266315264873524,4.65802591  
580135,3.19256029441022e-06,6.97853594399221e-05,11.8717246718323  
"Rbm17",2912.87532776215,0.162834182316026,0.113738289707394,1.4316566  
8074434,0.152242099616554,0.271113020214045,0.212534349420143  
"Prf1",34.7143504089971,-1.35799589319013,0.474518393298987,-2.8618403  
6776522,0.0042118898575782,0.017439674759622,-5.4985355697765  
"Atg101",1570.51767790057,-0.321875301670351,0.357685721237675,-0.8998  
83004992729,0.368182515262902,0.513249637706161,-0.21468855022265  
"Islr",1138.84384285234,-1.47411925459666,0.252142109980347,-5.8463826  
3997854,5.02377711226914e-09,4.77822468951335e-07,-21.4543708095241  
"Fam193a",1621.86248235548,0.0752014262880559,0.198493439139165,0.3788  
61017342401,0.704791073625596,0.803955792052411,0.0164097781553281  
"Spry1",1823.31862476479,-0.950237965554518,0.255047482508001,-3.72572  
964143924,0.000194751057457327,0.00165819044467378,-6.0834504087593  
"Thap1",461.143411981871,-0.22700953946238,0.12502236874867,-1.8157513  
8700766,0.0694085174792185,0.149159845013755,-0.431939396226028  
"Lipt1",272.894593002002,-0.490564269894378,0.407040578595413,-1.20519  
745620248,0.228127084176684,0.364591957973523,-0.494967807358587  
"Syn1",20.3666855032088,-1.96426245357417,0.435273384200732,-4.5127097  
7016212,6.40045793374389e-06,0.000119881007485243,-17.7353471262465  
"Mospd3",1576.7738486355,0.0571467773291666,0.155221052937525,0.368163  
829890832,0.71275107865153,0.809483056168643,0.0120785107006205  
"Zfyve28",54.6187319903768,-1.12451860595373,0.385439221924615,-2.9174  
9915937113,0.00352850599855055,0.015314237294573,-4.69933215137874  
"Fgf2",475.65453780477,-2.29083798766487,0.469399630189767,-4.88035746  
159139,1.05893726405709e-06,2.92399786079693e-05,-23.9162882383718  
"Hook3",4127.33315608729,0.351306856789028,0.228483301195525,1.5375603  
1600925,0.124156156734423,0.232478319793315,0.512542056843954  
"Mxd4",10559.0534487334,0.0262625121307327,0.174633667790255,0.1503863  
05590715,0.880459844955364,0.925356083276179,0.00203735799145248  
"Matr3",6745.8682136514,-0.216033967831714,0.0723107224945072,-2.98757  
861046298,0.00281196968482833,0.0128794420753542,-0.94020637347447  
"Spre3",518.955929375754,-0.310979673731373,0.252653320122461,-1.2308  
5528256918,0.21837699491839,0.353794320475178,-0.323120180349452  
"Clic4",10622.9389147506,-0.637382200880704,0.147136911514052,-4.33189  
873514393,1.47828934277642e-05,0.0002287594095671,-5.34307283032241  
"Zfp692",1538.41584646838,0.217470746971785,0.199494751947223,1.090107  
60859171,0.275665745094357,0.419081920237683,0.18913188699076  
"H2-  
M10.5",0.664070677813134,1.17862912433647,2.91259072137706,0.404666922  
711069,0.685722359075084,NA,NA  
"Pomk",658.987852960096,-0.407698065805488,0.0906171848730445,-4.49912  
526389643,6.82336446477094e-06,0.00012551128333406,-3.66239856816648  
"Mex3c",1512.45595052636,-0.477225906604725,0.101812828413996,-4.68728  
660266865,2.76851134045946e-06,6.19752400875759e-05,-4.62373472251473  
"Itih2",259.61009922253,1.06198611309962,0.453987576338252,2.339240473  
63878,0.0193229914966426,0.0559789708059203,3.06147145639425

"Aagab",2125.0191997953,0.117657276115149,0.111271518683284,1.05738896  
626405,0.290334105081381,0.434120734729813,0.0981770659879482  
"Dzank1",266.227612027481,0.212987931782633,0.205368985280017,1.037098  
81748808,0.299689806248793,0.444091187280663,0.17288770578904  
"Hgsnat",1954.59395270693,0.140332905051949,0.125661278922295,1.116755  
34624096,0.264098946236888,0.405991785141937,0.126499217506921  
"Kin",1272.65880637517,0.260898532151184,0.195893912957137,1.331835829  
97942,0.18291414126191,0.311073696146945,0.304657850583121  
"Aldh3b3",161.796071695894,1.60893475428001,0.540544927998805,2.976505  
13572771,0.00291554198999164,0.013238760531173,6.95800945240132  
"Rsrp1",28507.0120235277,0.0235783186190471,0.117600790215483,0.200494  
559397466,0.841093812587645,0.898266262684664,0.00252968829163  
"4932438A13Rik",2887.50143763858,0.0136007748422583,0.116261166224216,  
0.116984675829145,0.906872197010695,0.943050351856775,0.00079748962570  
9417  
"Gemin5",804.824187519563,-0.0450795385749999,0.148653403510202,-0.303  
252650195165,0.761697327789675,0.845664505366508,-0.00755679862577664  
"Tmem97",896.233342326001,0.325281765045726,0.267979073118582,1.213832  
71186175,0.224811612049777,0.360950000967273,0.331467268350499  
"Ovol2",164.941154000648,0.553270669583687,0.259458030344685,2.1324091  
1776243,0.0329732284928582,0.0845714297755524,1.3666664015886  
"Galnt6",373.903541540375,-1.98734127270728,0.404051328889394,-4.91853  
665763169,8.7193589818261e-07,2.48393874403066e-05,-21.0719384251379  
"Stag1",1994.27262922371,0.0923179891512167,0.11863689581829,0.7781558  
04856994,0.436477167482265,0.578543018940467,0.0505203153806138  
"Tbcel",4308.60384694745,0.982727028022599,0.206471426927376,4.7596272  
4066543,1.93950823692302e-06,4.64576555325861e-05,9.80463738292364  
"Ldlrap1",1380.25229214348,-0.667201598910085,0.146528107506179,-4.553  
40350916597,5.27848881379411e-06,0.000103541222224706,-6.1219354540524  
"Lsm1",743.522492909049,0.0359026370086075,0.154320754952176,0.2326494  
38630168,0.816033633986174,0.882553161880229,0.00448554090111471  
"Ttc13",1560.15973442484,-0.189707561094775,0.184202372790807,-1.02988  
663077767,0.303063227317641,0.4476611216848,-0.152471525312594  
"Man1c1",885.25351749375,-1.36790072856872,0.210460666905637,-6.499555  
23129668,8.05578223053706e-11,2.01373899911553e-08,-24.2401414122209  
"Tacc3",448.87708019396,-0.0903583289036722,0.277904075720397,-0.32514  
215082827,0.74507348879384,0.834239283593792,-0.0163760923705065  
"Jade3",439.230695760658,0.136279918907929,0.174441608740619,0.7812351  
64544752,0.434664195188267,0.57681089483297,0.0749867722556754  
"Bag4",1552.92627991596,-0.0692741803506205,0.252654438351974,-0.27418  
5487508097,0.783942080217139,0.860390831646905,-0.0104166571903221  
"Traf3ip3",344.068977622581,-0.960431272998921,0.481550290683378,-1.99  
445684403171,0.0461021517125117,0.109170179401684,-2.12720864580507  
"Tap1",2894.40519968644,-1.23060554545153,0.332663418855826,-3.6992511  
8212311,0.000216236515119595,0.00180024746874546,-7.77721924830084  
"Bbs7",456.215757172744,0.528773831107749,0.15789456339625,3.348904609  
0887,0.000811317234714422,0.00501046112151127,2.80050641459071  
"Capn15",2391.28466218463,-0.0897273250996568,0.205683846101394,-0.436  
239047452587,0.662663300169893,0.77118525311471,-0.0233135510000066  
"Larp1",10446.9762375105,0.286474052119297,0.142114856971702,2.0157924

2468886,0.0438216860315754,0.105213056796411,0.645073066822924  
"Hand1",1.49047149848955,0.173424208914893,3.39011351322465,0.05115587  
08103354,0.959201315764919,0.975155495843599,0.0043630648277738  
"Mfsd2b",294.846540289033,0.753523658105308,0.24299318958336,3.1010073  
1381531,0.00192863526874146,0.00971442275120668,3.49193684987869  
"Map4k1",599.998438080666,-1.16827718937382,0.485324845561973,-2.40720  
663707426,0.0160750714557997,0.048692208054246,-3.53080968413509  
"Fam53a",1558.96216806042,0.150823438423374,0.13477140897736,1.1191055  
9938355,0.263095091349423,0.404975770990056,0.13633353483593  
"Slc9a7",39.6929417624434,-0.0453847759355739,0.402658376056124,-0.112  
712856938677,0.91025820784577,0.945059346995571,-0.00256458260464955  
"Taf2",1494.33393298905,-0.0863337925707402,0.132605652722412,-0.65105  
6654058827,0.515009915968411,0.648812001134075,-0.0373490587518096  
"Slc12a9",2222.78516434385,0.209907534782445,0.164978723935129,1.27233  
093926088,0.203255560189333,0.335427584644233,0.229292325375169  
"Hrh4",0.68698123661467,-1.15230856617333,2.09144065242196,-0.55096402  
7996165,0.581658333986564,NA,NA  
"Chst7",737.2554509431,1.17911410661971,0.383393021110118,3.0754709702  
4763,0.00210170386895763,0.010369185738091,5.38727422814273  
"Paqr7",3032.8545146529,1.34652715491312,0.350894695217947,3.837410976  
18125,0.000124338287269835,0.00117801162545541,9.08088127386477  
"Nudt22",892.962480104441,0.556802867389905,0.155987133846558,3.569543  
54926237,0.000357603768845935,0.00265015518242419,3.30358773948142  
"Actr1b",5697.73342856952,0.123870956891391,0.0942720037812398,1.31397  
394690831,0.188854971838936,0.318069814366034,0.141892246039978  
"Letmd1",2758.15367885701,-0.327165790396795,0.340753851721342,-0.9601  
23528300836,0.336993048224252,0.48143980468028,-0.239149709959837  
"Uvssa",1665.41716500841,0.408468722458545,0.211051866778988,1.9353949  
7514273,0.0529418454648021,0.121442365043848,0.861180934954594  
"Dipk2b",43.0166233002925,-1.49419938816082,0.500459755411014,-2.98565  
343567672,0.00282973138167988,0.0129334511204862,-6.49668661883357  
"Sf3b6",2028.71563798318,0.336266991496257,0.254376871006732,1.3219243  
9574177,0.186193327875138,0.314810744615802,0.388651884571366  
"Ccn3",115.662280385208,-0.981412436805608,0.320771525820011,-3.059537  
2650261,0.00221679207217882,0.0108274077713784,-4.44155334023077  
"Letm2",596.002300912673,0.423316486260454,0.162238883690477,2.6092172  
0262861,0.00907496205738312,0.031356301647148,1.46566561261635  
"Srtr",7972.87965443721,0.0678918588753253,0.159531715199682,0.4255696  
66760911,0.670421447224306,0.776977970635967,0.0171320544106727  
"Pafah2",3556.84804361815,1.01444135944855,0.220129648491046,4.6083813  
1711193,4.05815908738213e-06,8.45363097070265e-05,9.51376524133333  
"Kdm6a",1292.1700022868,-0.245933196407992,0.118996445412131,-2.066727  
25018155,0.038759861925799,0.0957117259155557,-0.577061208288994  
"Enpp1",2021.63767536513,-0.0904633957184401,0.231550336262889,-0.3906  
85659016851,0.696029600510514,0.79739073670252,-0.0204818591263429  
"Ctbp1",7330.03943915785,-0.0596978978810575,0.161113830437734,-0.3705  
32422442336,0.710985823317755,0.808043925335135,-0.0127239418331048  
"Hhat",234.317753921432,-0.0476091517615224,0.224812272387664,-0.21177  
2921717662,0.832284194720033,0.892673419561928,-0.00540528012524394  
"Trmt6",1233.77063685393,-0.0197289360190516,0.113922783134319,-0.1731



78142916246,0.862511403479106,0.913137174623208,-0.0017927519156641  
"Spon2",59.3730615944842,-3.01915899712734,0.623575647423996,-4.841688  
42962285,1.28740514665208e-06,3.360351479173e-05,-31.0999941969213  
"Rims2",223.896991805036,0.372466752281392,0.426029643555547,0.8742742  
62168399,0.381968912284935,0.526781005215141,0.238740150786637  
"Muc3",1.10637024828738,-0.171485790319005,1.53767375603072,-0.1115228  
69949781,0.911201731121239,NA,NA  
"Nmur2",2.23252716785896,-4.55818606959635,2.78986969722726,-1.6338347  
5368995,0.102293552786547,0.200736684000814,-7.31935860464728  
"Rcor3",1247.94320659633,0.253125993630864,0.136263229870433,1.8576250  
8250796,0.0632222740598725,0.138849729625974,0.499762599319352  
"Atp11b",2127.64072644523,0.121695730117072,0.12762837670811,0.9535162  
41888699,0.340328570892857,0.484961373621934,0.0880695001898031  
"Icam1",3575.02639948343,-0.70118622449157,0.353064110590491,-1.986002  
55154468,0.0470330405962165,0.111036472399205,-1.54113478474649  
"Htra4",120.221021094692,-0.520997875294611,0.4087128009598,-1.2747285  
4794645,0.20240533866619,0.334420751911989,-0.570677806158015  
"Cnm4",577.297991372707,0.144724659694285,0.133981252013646,1.0801859  
0302131,0.280059404571694,0.423926579484427,0.124201979375212  
"Tbc1d2b",1768.66277759283,-1.18284589030907,0.182275155041383,-6.4893  
4239030286,8.62118412173929e-11,2.10119810007091e-08,-20.9105543262497  
"Serpine1",1304.82566587364,-1.25934291870101,0.307934699131769,-4.089  
64277897802,4.32038054156989e-05,0.000518073676503873,-9.5274242190932  
2  
"Ranbp10",2355.88280311075,0.0968103081609908,0.110193218122195,0.8785  
50511644342,0.379645038636287,0.524429257054929,0.0624857039056889  
"Dmxl1",2827.37729522802,0.63344993477384,0.150441678692239,4.21060134  
585243,2.54691835943713e-05,0.000346061422803521,5.04789555942042  
"Best1",27.3764994581534,0.0556591759270266,0.36139031854724,0.1540140  
20493886,0.87759868073032,0.923643478186321,0.00442095980445815  
"Endod1",1922.59208635439,-0.724326813682492,0.218244670968242,-3.3188  
7514352133,0.00090380831053977,0.00545080557961783,-3.77518546301801  
"Depdc5",726.02787107952,0.0443478279193998,0.213422737955527,0.207793  
360464905,0.835390317048754,0.89489514062099,0.00492476991941681  
"Vgf",14.3331133081695,-0.8626926708817,1.04759225874252,-0.8235004255  
54152,0.410223475280115,0.553723594393333,-0.509928703564692  
"Fer1l5",1.33080173873238,1.18090413916733,1.86294840881097,0.63388987  
7777689,0.526152691932271,0.65870417653793,0.493004737170139  
"Slc30a1",2458.34018120709,0.421462231559534,0.221839950461503,1.89984  
820444987,0.0574530428822385,0.129400419327468,0.861824370603335  
"Adam32",13.023933232457,0.776037353114402,0.788297866701042,0.9844468  
51749137,0.324895851417421,0.469837522134309,0.586194048466354  
"Vnn1",1891.9216670964,2.63509360730928,0.619315837283144,4.2548461522  
7843,NA,NA,NA  
"Cep85",2251.05236411987,0.814202211614308,0.408849698481147,1.9914462  
8121048,NA,NA,NA  
"Tulp1",38.8854699224741,-1.20263396746705,0.522285198009294,-2.302638  
42829726,0.0212991951282146,0.0603884988526871,-3.37574136261117  
"Arid5a",837.805403395974,-0.854056850480785,0.330534241981801,-2.5838  
6799915214,0.00976991784200169,0.033166969280104,-2.90908912692959

"Slc22a20",0.619583298269589,-2.6884766422384,2.61335054765691,-1.02874704070942,0.303598558701306,NA,NA  
"Slc18b1",1152.01267900758,-0.47744674090963,0.317530011490705,-1.50362713328471,0.132677400714905,0.243844279304291,-0.673784995132182  
"Azin1",4201.37596164439,-0.0309660480060211,0.0809287561489913,-0.382633435623452,0.701991575487307,0.801841343810868,-0.00683868189540638  
"Ints7",1587.09397236543,-0.0408031810803618,0.132288128279432,-0.308441744630125,0.757746221648052,0.842854396336032,-0.00697575495557956  
"Fbxo27",41.2598414421737,-1.88664159204277,0.399547532291372,-4.72194529953179,2.33599516381192e-06,5.37113605000057e-05,-18.5492451008932  
"Klf10",2240.34110237351,-0.934953831935238,0.222313305706586,-4.20556848346815,2.60426712427938e-05,0.000350778232908731,-7.43789090314396  
"Tcdc1",135.935912204087,-1.03665780266994,0.324568315642525,-3.19395872211909,0.001403361818568,0.00763682632945543,-5.05347163671776  
"Acp7",0.0852369980448597,0,4.78471990596509,0,1,NA,NA  
"Uggt1",2885.77065109324,-0.0741618986311977,0.124488812967152,-0.595731430508267,0.551354657652612,0.681305096324903,-0.0284592623093295  
"Dtl",128.114605498999,-0.976750775477422,0.319902520755968,-3.05327627043776,0.00226357439613988,0.0110007910209211,-4.40493902174196  
"Thoc2",6931.86977923732,0.399086389540723,0.246675833475051,1.61785767141671,0.105693274265257,0.205489572165088,0.631498335384967  
"Tbx10",81.7041230403846,1.79997799230542,0.841855431545249,2.13810818919528,0.0325079634445235,0.0836311216837734,4.46635659803592  
"Erv3",2.48350683837848,-1.17146084415736,0.993143407234394,-1.17954852806155,0.238179824978498,0.376324337991094,-1.14487325916453  
"Asxl2",1841.01801026042,0.124879032723256,0.160277602168242,0.779142132362151,0.435895993608753,0.578091421805433,0.0684366138198742  
"Ubr5",6203.94223560633,0.000438187999394253,0.10624323571796,0.0041243849213845,0.996709226278067,0.997783872976832,9.72157877672058e-07  
"Slc2a12",290.051785398449,0.510158438013532,0.357187027217041,1.42826698379373,0.153215027077991,0.272498467850344,0.663268355398291  
"Zmat4",12.5037120045705,-0.472951331910071,0.907227928556036,-0.521314784326394,0.602147503559796,0.723705358097078,-0.15293871364451  
"Cib2",925.837140243729,-2.22548166025781,0.694986782807307,-3.2021927831034,0.00136385690476533,0.00747820076746751,-10.895430891956  
"Nenf",2120.55899041509,0.0973888230420071,0.235456305353551,0.413617392389524,0.679154333772307,0.783976745005769,0.0237020945082225  
"Fam168b",5626.17528253526,-0.528875661347342,0.133728778418708,-3.95483805057592,7.65865121839942e-05,0.000803704959399096,-3.76891516052222  
2  
"Arhgef4",212.503383664996,-1.4353823926225,0.29096325469133,-4.93320847041401,8.08897391695966e-07,2.34004174232759e-05,-15.3051332199185  
"Pank2",2530.10656933115,-0.153468507697955,0.160328143675002,-0.957215022766362,0.33845873601806,0.48307359892249,-0.111661577270027  
"Ppfia1",2796.60011404091,0.462256815170403,0.123568641854625,3.74089095932796,0.000183369067889408,0.00158270477454966,2.98091854941553  
"Mavs",2347.74281423893,0.0618096302293133,0.233241849039989,0.265002316195479,0.791007677522709,0.865540585685941,0.00892537319989888  
"Bcdin3d",405.672606503587,0.502018865231962,0.172765250455113,2.90578611097719,0.00366331766239955,0.0157366358917201,2.08426374592155

"Atg14",922.891263312279,0.292223986883793,0.0922801246812538,3.166705  
59227318,0.00154176319996546,0.00822245592804336,1.40293414680316  
"Mrpl47",864.575377632032,0.597124413346927,0.188162012867553,3.173458  
89452853,0.00150634230086118,0.00807329911550064,2.87765783348228  
"Rapgef6",1353.21720111231,-0.469777538997995,0.158709874194907,-2.959  
97675873067,0.00307662251408993,0.0137776724344799,-2.01285861023876  
"Fbxo34",706.102818306431,-0.12339311228721,0.146708450524908,-0.84107  
7060290132,0.400304765363605,0.544428287215633,-0.0750253628110325  
"H2-  
M11",0.146686701365375,-0.548352236011353,4.78471990596623,-0.11460487  
6939106,0.908758313945078,NA,NA  
"Shank2",1043.34440538157,1.0107760451106,0.37573232613965,2.690149275  
93672,0.00714200637021877,0.026165885044443,3.68255916659447  
"Aldh8a1",8303.11877850935,1.99281921921063,0.91986063125653,2.1664360  
3552033,0.0302778827845969,0.0791787303184663,5.05388434393731  
"Dlga5",104.731390828008,-0.351169800522852,0.381430829352435,-0.9206  
64438999442,0.357225647739785,0.502393658369181,-0.241735207394176  
"H2-  
DMb2",934.608242235527,-1.60884046228616,0.621295931655649,-2.58949138  
45627,0.00961178279761082,0.0327927455796703,-5.49828943889513  
"Plekkg2",2933.90808735012,-0.733269785657417,0.296307150124201,-2.474  
69487438982,0.0133350048677692,0.0422705129103827,-2.31982034531707  
"Zdhc18",2155.05523124075,-0.394491983031323,0.12181907361374,-3.2383  
4331791232,0.00120226037841021,0.0067633216555806,-1.97097707519518  
"Rps16",15078.5155305106,-0.146885816168633,0.194606757530191,-0.75478  
271172493,0.450379368717099,0.591028195668731,-0.0772460101705338  
"Vash2",83.2914069158857,-0.824127010900707,0.441551162642116,-1.86643  
605685322,0.0619803824167217,0.136800259945805,-1.63938095417455  
"Mcrs1",2306.8563636749,0.15937645309729,0.130101767802355,1.225013739  
5474,0.220570043814555,0.356488288651874,0.164389462613048  
"Wdhd1",314.348369602957,-0.364997782259026,0.401795369919342,-0.90841  
709383634,0.363657897809799,0.508632576739703,-0.24674922307565  
"Tob1",5557.86661688602,-0.471587057437186,0.475751410282423,-0.991246  
788227564,0.321565089100951,0.466856002032043,-0.359224091643107  
"Ephx3",50.7203018820901,-1.30316500238473,0.378199874056238,-3.445704  
48532446,0.000569572853070614,0.00381502284066329,-7.25707650793987  
"Pkd2l1",1.34553949087394,-0.0936824469310277,1.78853370776542,-0.0523  
794695757082,0.958226332562496,0.974621650094082,-0.00240819484284674  
"Kcnc3",93.2907253491752,-0.528084392791063,0.49477921924298,-1.067313  
20203593,0.285830428481718,0.429958470493484,-0.445738427089863  
"Gch1",230.665593132549,-1.03487982329293,0.247074164051265,-4.1885392  
0751587,2.80755810457546e-05,0.000370126896031186,-8.17727331555051  
"Nr0b2",54.752203903387,2.22685192389942,0.639599113994443,3.481636974  
12309,0.000498358824122003,0.00345186513418501,12.6236685416445  
"Rskr",42.350925592521,0.245688910887041,0.421161690702294,0.583360064  
105904,0.559650936095756,0.688155007378132,0.091824059783399  
"Clba1",752.664184121823,0.963325494617235,0.325948968508305,2.9554488  
2079506,0.00312214492289021,0.0139295754550897,4.11700363251614  
"Kdfl",1028.90440777572,1.09144430146228,0.260949706082423,4.182584904  
37825,2.88213329076252e-05,0.000378168471758329,8.60076748054248

"Nme1",5054.83732594802,0.676040507116095,0.291708176464332,2.31752333  
89413,0.0204752407967168,0.0584868882894755,1.91924701059441  
"Adgrl3",237.851857406727,-0.447568170515964,0.575218689412318,-0.7780  
83498944078,0.43651978986194,0.578543018940467,-0.244928267358094  
"Osbpl5",2299.60296397851,-0.265737001035023,0.146023237208688,-1.8198  
2680369732,0.068785384516042,0.148163657456229,-0.507408280623103  
"Bclaf1",5851.48902850128,0.262228101007401,0.159901757624594,1.639932  
57424375,0.101019187034288,0.198936684051565,0.423437723337304  
"Kcnmb2",21.6202937089271,-0.736051592734068,0.713153133440864,-1.0321  
0875507582,0.302021172897788,0.446722005254968,-0.59312420384738  
"Tnfrsf23",176.751852352983,-0.980174368623841,0.244548817535661,-4.00  
809285647397,6.12110543306762e-05,0.000676200077812762,-7.154313841908  
08  
"Spag1",397.149981201165,0.197758318312616,0.199969300114892,0.9889433  
93805922,0.322690837849823,0.467793751404896,0.150242488608658  
"Atoh8",608.753685764714,-0.646012688824279,0.264206531466627,-2.44510  
491560607,0.0144810009876639,0.0451183376889535,-2.00164868424551  
"Wdtdc1",3324.90249406954,0.477686104467214,0.186531152365509,2.5608918  
3179004,0.0104403856815328,0.0350855980728244,1.60023151313934  
"Kcnk2",495.413843027985,-0.725974853976912,0.35074069785411,-2.069833  
52208211,0.03846793701114,0.0951595833345862,-1.70763803129465  
"Clnd11",62.9802956855536,-1.26218706819935,0.686319704116234,-1.83906  
57599211,0.0659055144271139,0.143242193768796,-2.45270515868499  
"Rgs22",1.16864891056882,-0.552271812181936,1.92219950913342,-0.287312  
430139427,0.773873105841834,NA,NA  
"Cdkn3",44.6321442883208,-0.347886836729277,0.331103305742677,-1.05068  
971132425,0.293401122940957,0.437365068432934,-0.287697903888266  
"Slc25a43",53.1306972215924,-0.274315918450362,0.392538428418321,-0.69  
8825639965187,0.484661002885481,0.622172975632144,-0.13017308838944  
"Zbtb42",543.243087386686,-0.469800382945316,0.224917673173051,-2.0887  
659752013,0.0367287946335757,0.0918243412957377,-1.12182593341933  
"Zfp60",999.328627322598,0.00509639441973246,0.101338191136208,0.05029  
09550939433,0.959890531440116,0.975703554479167,0.000125353332179732  
"Prkci",2197.43543633791,-0.578545923933235,0.153640295802857,-3.76558  
715218561,0.000166158151526707,0.0014692751194865,-3.77384702917424  
"Vps13b",1498.89274876243,0.0595699641126494,0.120673261578773,0.49364  
6755986316,0.621555674006062,0.739607569346831,0.0179684185992305  
"H2-  
DMA",2672.00038107596,-1.13011672020916,0.446180387080946,-2.532869558  
88569,0.0113133043979149,0.0373306497123954,-3.71575662636846  
"Phc3",2780.17955365694,-0.0196737928725514,0.134977085060886,-0.14575  
6539813234,0.884113585609342,0.927895720325706,-0.00147230644555029  
"Kctd8",7.04639194944388,1.73673550353481,0.625085146333379,2.77839829  
2972,0.00546276119505124,0.0212388669553558,6.68977043910264  
"Slc20a2",1865.2757633508,-0.019463438175153,0.10947057913104,-0.17779  
6064747722,0.858883137986945,0.910680484228041,-0.00182106105373067  
"Gdf7",3.35283808378736,-0.260107562938472,1.29396920212352,-0.2010152  
6567372,0.840686637418998,0.898077364474886,-0.0279613191427591  
"Gpr160",683.732378298367,0.721658196506084,0.127095953711764,5.678057  
99815395,1.36232527452616e-08,1.01384038941645e-06,9.96015689051226

"Cdkn1c",3499.41859818322,-0.601306853067751,0.249945022855329,-2.40575645875451,0.0161390197052514,0.0488479674344911,-1.81537095076148  
"Ldah",1605.69025091636,-0.24382666983832,0.268232619952866,-0.909011998172204,0.363343792536726,0.508324253891018,-0.164981839169557  
"Rfx7",1822.84961000447,0.313471758836181,0.162029365596093,1.93466016288432,0.0530320119591513,0.121563386924469,0.660585134157636  
"Inf2",1962.98348996777,-1.05579496759758,0.200964102484743,-5.25364955503799,1.49114485783911e-07,6.24065568814102e-06,-12.6530959243251  
"Esys3",80.2760614688886,-1.71397631626519,0.597660304714606,-2.86781019710461,0.00413323408521419,0.0171986715608152,-6.96375402473682  
"Armc3",28.4715113361809,0.0955085701848893,0.594884558665168,0.160549755063732,0.872448031032209,0.920135116312274,0.00794963236007788  
"Atp8a1",1753.09541931715,-0.810166750590235,0.195349614826953,-4.14726566677854,3.36469559186849e-05,0.000425879091789407,-6.28799182053682  
"Aspg",3055.09378133813,0.314247113086082,0.561665345731129,0.559491724875818,0.575826177208859,0.701409308628621,0.111452034371979  
"Tmem247",0.548761693872035,-0.47052619180003,3.62476210081469,-0.129808847784597,0.896717662628188,NA,NA  
"Ahdc1",2344.51134370267,0.149574187304934,0.271080270564844,0.551770835233672,0.581105371378438,0.705547825589188,0.0521685927939026  
"Ddhd1",2246.93505600342,-0.32098905930739,0.16524747696359,-1.94247479722862,0.0520796480867643,0.119958532592526,-0.680692338672472  
"Lzts3",4630.53536319493,1.0837659112123,0.385296272486968,2.81281182456535,0.00491103813542478,0.0196059421712761,4.26128366497936  
"Tecta",10.3859832878627,-0.426561601658391,0.762135812631893,-0.559692373181285,0.575689285431552,0.701286373069124,-0.151360672799036  
"Cd81",14921.6842413242,-0.00726493177096843,0.138476250171413,-0.0524633773804212,0.958159475745198,0.974604489440235,-0.000186879778550595  
"Spag6",9.61312791472902,-1.03035757609366,0.73973822467722,-1.39286783043183,0.163659761989276,0.286166087280683,-1.28916579241693  
"Fam13a",2796.28394828381,-0.52363668001606,0.568395734338398,-0.921253711774532,0.35691798166319,0.501997172795851,-0.360869868694424  
"Cisd1",7712.31850897678,1.07152243237835,0.458842263414651,2.33527405344967,0.0195291087228294,0.0564032827548108,3.08087121158683  
"Fermt2",4543.90677965857,-0.445314718763918,0.232465374144458,-1.91561741357313,0.0554138114086646,0.125693170642874,-0.923543314345372  
"Ccdc33",57.7803244703773,-1.63516646995802,0.67403896329191,-2.42592277154439,0.0152695192307464,0.046765981375982,-5.00785957843676  
"Tmem33",4216.42051565046,0.434466412782393,0.268916782906365,1.61561657880487,0.106177237197883,0.206117460263274,0.686156749462885  
"Gnpnat1",1708.2237148395,0.587970005429856,0.124444639836195,4.72475155381376,2.30396856993828e-06,5.32260416785031e-05,5.78619093692808  
"Ckap2",150.76536224645,-0.0407340797622842,0.409585407430817,-0.099451980034627,0.92077941318854,0.951272028736828,-0.00203487960648294  
"Avp",0.184661161985439,-1.5136018459531,4.76413058682178,-0.317707883604182,0.750706530585793,NA,NA  
"Mynn",966.739229661581,-0.321930517697255,0.204185002454617,-1.57666093898747,0.114873562739011,0.219044584189201,-0.488845049008  
"Themis2",818.456029514741,-1.24203517685377,0.345487307911319,-3.59502403825665,0.00032436162610356,0.00245990003335947,-7.46169346153561

"Limch1",2308.58611248379,0.532323152167559,0.291350372079087,1.827089  
31644357,0.0676863413131399,0.146248701565115,1.02336287183229  
"Actrt3",5.2981971538578,0.813060927178888,1.00151364492621,0.81183210  
1637307,0.416887979202825,0.560254065523393,0.471058970658678  
"Nek5",87.4798875126535,-0.400256181035874,0.33189669111833,-1.2059661  
6883165,0.22783053528211,0.364237436612871,-0.404238460109419  
"Mrps26",2231.24066294307,0.598155842301123,0.169775239702087,3.523221  
89826229,0.000426334256156678,0.00304604812258809,3.46566125146013  
"Eef1a1",167201.388656036,-0.200419150373812,0.213553648310641,-0.9384  
95558185344,0.347989798576415,0.492817046240772,-0.141820053401093  
"Phyhipl",1465.9123821724,2.31658730831394,0.771693749525153,3.0019516  
287898,0.00268254797040342,0.0124415604964143,10.1622030997167  
"Fam222b",739.447441663784,-0.174061754418124,0.0947090765184179,-1.83  
785716022978,0.066083456170191,0.143564927956143,-0.337848275591125  
"Xkr8",240.12002326574,-0.599130323912864,0.218532289179176,-2.7416100  
667011,0.00611388731897201,0.0231923297558981,-2.25508679826133  
"Ppp1r16b",2120.10460253476,1.33049384046125,0.241982004508067,5.49831  
729498255,3.83432537302209e-08,2.19887282715249e-06,17.3330958936986  
"Ptger2",99.5502518618292,-1.54049918754081,0.283730459808201,-5.42944  
592054786,5.65292788947192e-08,3.00329122585622e-06,-19.588682334679  
"Actr5",728.48108678904,0.169238211518313,0.167415370526216,1.01088813  
402478,0.312069973923371,0.457189897930565,0.132455376616233  
"Slc16a9",3565.87807929027,2.02642316494651,0.573377898274804,3.534184  
29807578,0.000409035757614015,0.00294643946096764,11.8082875516781  
"Slc32a1",0.355826751147007,-0.527903618314056,4.78471990595454,-0.110  
331143450442,0.912146759127146,NA,NA  
"Mrpl23",297.270744256464,-0.148455022808588,0.237798580231759,-0.6242  
88936729155,0.532437848197864,0.664724895777591,-0.0606263612742221  
"Pced1a",1050.12425552215,-0.155775882769723,0.161096716995761,-0.9669  
71181503479,0.333558440394069,0.478285223621382,-0.114892194260377  
"Mbl1",129.884232614111,2.386240553682,0.805204874005786,2.96351975840  
729,0.00304142535567914,0.0136734405314807,10.2424602691381  
"Dzip1l",2091.3152908441,0.220186355418303,0.135629222762299,1.6234433  
1799494,0.104494670985819,0.203946922211882,0.350073296571874  
"Apopt1",1462.12087798692,0.583792005842019,0.264165389974427,2.209948  
87293348,0.0271087108077378,0.0728754506175751,1.52895327790752  
"Vopp1",1149.95225897158,-1.18194420370922,0.2363855932105,-5.00006869  
139739,5.73098929148025e-07,1.75972959378397e-05,-12.9396477489097  
"Phf12",2748.7878077642,-0.0781261341660694,0.170874178955089,-0.45721  
4393911461,0.647516953448321,0.759802178559905,-0.0214610280328344  
"N4bp2",1013.74259241834,0.627876426657634,0.308400050713432,2.0359154  
4555569,0.0417588465724288,0.101169730426096,1.43843706180244  
"Adh4",10.9121686730896,-1.1204573980529,0.631875657190073,-1.77322450  
280097,0.0761915133974022,0.160049787569764,-2.05298085750815  
"Mat1a",13.5807855803741,1.00833904350537,0.779172004420357,1.29411611  
015914,0.195625317656832,0.3262876341893,1.1293155015262  
"Iqch",1.95145992063425,-3.26062889360136,1.46928903447358,-2.21918820  
402112,0.0264739232440535,0.071662807618712,-8.59431147268667  
"Rpl10a",12982.0205055298,-0.19477206173652,0.181754691711604,-1.07162  
054471513,0.283890501705614,0.427907361097486,-0.165331982743008

"Fam76b",1566.28468396969,-0.185140731871396,0.113722382559612,-1.6280  
0609435304,0.103523593533987,0.202579589193666,-0.295599846433984  
"D630003M21Rik",415.476583166221,-0.900544672390389,0.370012042756105,  
-2.43382530385366,0.0149402038085118,0.0460577691670332,-2.77174936178  
207  
"Ctnna1",15370.3299586193,-0.161428779412162,0.0838889904360997,-1.924  
31424639836,0.054315205923147,0.123762753896169,-0.337287487100586  
"Fbxw17",908.536029178778,-0.327736689393185,0.233763204691507,-1.4020  
0289359351,0.160914382620658,0.282531169053362,-0.414248163948088  
"Abhd18",869.295917052143,0.554015389406803,0.231369057840387,2.394509  
42393948,0.0166426157617786,0.0499534670756096,1.66019762128838  
"Tgm2",12373.0646409899,-0.519078315584858,0.15651220975754,-3.3165356  
0057062,0.000911409747710387,0.00548477384594356,-2.70220721132848  
"Smim14",4636.03721749495,-0.288026982825641,0.204005765702532,-1.4118  
5707096937,0.157992050154933,0.278857736618199,-0.367825875671355  
"Tspan14",3906.4899189764,-0.199512994335557,0.168606000528044,-1.1833  
0897898484,0.236686715554335,0.374800420683702,-0.195794392578249  
"Ppm1k",1039.9367533521,-0.0661371057080233,0.132796967473778,-0.49803  
1747005687,0.618461666001467,0.736818132940034,-0.0201992101684665  
"Sh2d4b",202.113262175245,0.276782110211388,0.355285406472743,0.779041  
596330307,0.435955212036308,0.578130634855739,0.151664258552469  
"Vstm2l",4.99600882831468,1.63612580680205,1.29991387018579,1.25864170  
259849,0.208159776998121,0.341354022868744,1.75856552699662  
"Fdxacb1",437.530014118771,-0.0301390257317561,0.114050875643086,-0.26  
4259485618277,0.791579976683213,0.865923832213268,-0.00433876374743802  
"Rtkn2",14.817895729846,0.17625937782589,0.712206952959751,0.247483371  
361935,0.804534159052464,0.875540100057596,0.0234273963768323  
"Nmrk1",2590.32395042903,1.7263724398173,0.297903416068697,5.795074331  
80693,6.82909274914499e-09,5.96319630519015e-07,24.7432140395234  
"Ifi206",221.575713025776,-1.06076073576794,0.479782051880474,-2.21092  
208766535,0.0270412328466085,0.0727642779524112,-2.77975547057537  
"Iars",1626.35933413484,-0.392128778993432,0.137417847754044,-2.853550  
57878129,0.00432336451214583,0.017799189454776,-1.57973092407275  
"Cpe",5794.49357659294,-0.356093348205503,0.440001265162547,-0.8093007  
37064822,0.418342182385361,0.561340298131564,-0.205618257520836  
"Zfp365",24.1208331723111,-0.889311310630606,0.499084946812528,-1.7818  
8365790295,0.0747682060306519,0.157842191553232,-1.6418105536708  
"Nufip2",1805.53081262189,0.0350028787723566,0.167293522153989,0.20923  
0329552972,0.834268436806175,0.893963837153594,0.0039234711147933  
"Aim2",424.29208549963,-0.888340465267321,0.482467028039238,-1.8412459  
5804519,0.065585523269956,0.142705784255954,-1.72957243193266  
"Egr2",471.395904867863,-0.837263724118652,0.424557546683368,-1.972085  
36430299,0.0485998624329481,0.113951028577994,-1.81852550301118  
"Ackr1",39.6188411280771,-2.24139706145019,0.596887061899914,-3.755144  
32213648,0.000173241622356985,0.00151444421523809,-14.5527338571076  
"Jmjd1c",2604.34189859102,-0.181569903350474,0.205825307485766,-0.8821  
55384915582,0.377692784865094,0.522880851980942,-0.117730226257574  
"Stk35",1249.25280450551,0.257858650694494,0.182134900221202,1.4157564  
002359,0.156846838933635,0.277488400828238,0.330568639097652  
"Dusp8",893.798826693255,-0.500587672016222,0.238389878137666,-2.09986

965858987,0.0357403084627767,0.0899180044396414,-1.20584416075168  
"Wdr19",572.784277791626,0.244833288407453,0.133238550591521,1.8375559  
2747369,0.0661278681490718,0.143629405499677,0.47510361607475  
"Pcdh18",665.401469709592,-1.45445581054307,0.368010875561305,-3.95220  
877188663,7.74331383915868e-05,0.000809539588396332,-10.3543361931104  
"H2az1",7135.52463357878,-0.238667944562395,0.249415506727983,-0.95690  
9005752762,0.338613185257936,0.483223295481171,-0.173577568928974  
"Rcor1",1583.21778738842,0.0839247340598431,0.119974966444421,0.699518  
712503427,0.484227922898834,0.62180427032939,0.0398751516504329  
"Sirpa",5753.35264573949,-0.415763836027635,0.310534293912726,-1.33886  
609040508,0.180614270532493,0.308345770671793,-0.489160078529691  
"Ankrd9",445.763220176309,0.0673592919045729,0.429770238121637,0.15673  
3263333857,0.875455070703271,0.922183844871549,0.00545682186598709  
"Bri3bp",1304.34826678274,0.223620909978519,0.103741214071267,2.155564  
80594971,0.0311176631597651,0.0808652800598561,0.562400040554236  
"Ankrd13b",1320.34427387824,0.224094382473763,0.251030448658569,0.8926  
98012019085,0.372018915267696,0.51725042834118,0.147729321652818  
"Tmem156",28.696242631916,-1.02683225463189,0.410266675935981,-2.50284  
099309132,0.0123200880756147,0.0397381434736702,-3.31198968803019  
"Ndufv1",12760.6044766217,0.847657428463783,0.312285562075565,2.714366  
37297588,0.00664026834757369,0.0247367123119969,3.13588052320779  
"Ddx60",446.385899281764,-0.754348578950158,0.277357221215193,-2.71977  
262984216,0.00653268183166851,0.0244105462540959,-2.80070015548543  
"Bank1",102.119563232579,-1.38615532033568,0.574266033373186,-2.413786  
01515665,0.0157877313481345,0.0479484713124495,-4.21062471106842  
"Ssh2",3136.59186638991,-0.19333101490656,0.235616810311057,-0.8205315  
00495776,0.411913179271578,0.555389196420526,-0.113695293428365  
"Bicd2",2941.07752961338,-0.84491832475656,0.23330720768765,-3.6214840  
215641,0.000292917899891129,0.0022694707842903,-5.1440390189744  
"Smarce1",3416.13034654105,-0.00982681769402411,0.189427747074433,-0.0  
518763372620528,0.958627229011562,0.974775160952669,-0.000251059849753  
131  
"Scarb1",1690.54983786572,-1.27318767220287,0.385896921415221,-3.29929  
471200144,0.000969280928795833,0.0057356720939791,-6.57098567314149  
"Chchd5",550.724650998111,0.109133628596698,0.141129838558311,0.773285  
293255732,0.439353557528566,0.581293049107144,0.0592050220895924  
"Inpp4b",484.487926848031,-0.611492423469946,0.256997782326757,-2.3793  
6848300298,0.0173423302703894,0.0515379904910916,-1.81334168531384  
"Crp",7.53380485443732,-0.401878047452411,0.846080178431992,-0.4749881  
3670023,0.634795429048273,0.749472235630487,-0.115896004996195  
"Ccr7",198.403832516258,-1.48276429942271,0.416596003262941,-3.5592379  
3749609,0.000371932455895816,0.00273864766807274,-8.74874089877563  
"Fgd3",998.347613055482,-0.688033725367644,0.328078446303189,-2.097162  
22787707,0.0359792169291419,0.0903558438542515,-1.6540327894625  
"Ano10",1385.70581704916,-0.165682427061045,0.248058621666453,-0.66791  
6422126325,0.504186944059407,0.638933903241278,-0.0742181502951178  
"A4gnt",232.876951262201,1.79961738929085,0.682334531826878,2.63744146  
800333,0.00835340401441109,0.0294156892672905,6.34585960492316  
"Wdr20",1293.51911506045,0.111504052723248,0.130994063617188,0.8512145  
48539419,0.394650182570326,0.538933272149897,0.0689277371779333



"Nsrp1",3205.76990120686,0.424085126628375,0.254213117002472,1.6682267  
6826802,0.0952707189665461,0.190326688361651,0.703562853063214  
"Card19",1140.40467180892,0.13814563999837,0.15514563566543,0.89042556  
3090152,0.37323742120415,0.518462851644006,0.0907460611650502  
"Rflna",145.549086922202,-0.274674133033252,0.416981267413265,-0.65872  
0557729578,0.51007522930516,0.644469078602386,-0.120672157027103  
"Zc3h7a",6251.45834317878,-0.139359425884657,0.182471304969269,-0.7637  
33376643126,0.445026146480548,0.58620535095352,-0.0744297960510507  
"Ninj1",4178.50867022042,0.896980786344686,0.243932325380537,3.6771706  
4536398,0.000235835280788571,0.00192519681799471,5.60857604705643  
"1110032A03Rik",1909.7149937883,0.58899192818408,0.27845448490177,2.11  
521796243238,0.0344113746963869,0.0873068293858363,1.43615467994179  
"Snn",2693.00472834611,0.383636927264344,0.20834231364206,1.8413778773  
8811,0.0655662024251035,0.142679666839807,0.746999891089709  
"Itprid1",15.6732597271714,-2.15257239175958,0.933915682892866,-2.3048  
8943615535,0.0211727663968647,0.0601199483775878,-6.05177123852832  
"Muc5ac",3.77482962479787,-2.34149960348022,1.37791978547594,-1.699300  
37158981,0.0892626026100745,0.18093795879938,-4.00303024048453  
"6430571L13Rik",126.595984086963,0.538362568597041,0.365068773015221,1  
.47468808178396,0.140296421744776,0.254749453453124,0.736197220143084  
"Ccdc92",353.463362798369,0.267504009653077,0.285418623214939,0.937233  
900997514,0.348638255046881,0.493627819105664,0.18885072814617  
"Neurod6",0.220934797106264,0,4.78471990595636,0,1,NA,NA  
"Wnk2",160.253679882934,0.472998174961026,0.220511331777227,2.14500620  
511818,0.0319523508688773,0.0824846997539215,1.18019783002235  
"Sh3rf3",30.2539023885391,-1.24457748250473,0.309843625965402,-4.01679  
227264046,5.89956835404356e-05,0.000658441807482206,-9.1173196342511  
"Rmi2",78.3263545247428,-0.605945889569956,0.396433603170082,-1.528492  
75319879,0.126390241434595,0.235373154488228,-0.876551103220389  
"Rara",1578.66991575316,-0.0170919623958407,0.216927071096781,-0.07879  
12836762326,0.937198637112843,0.961004418954837,-0.000679854540730171  
"Dhx38",1655.43814772482,-0.444295132516442,0.0822797268733239,-5.3998  
129235464,6.67104258173933e-08,3.36974062846511e-06,-5.59841847180274  
"Slc9b2",51.83793493052,-1.04886207475817,0.461034411956502,-2.2750190  
6052324,0.0229047864464812,0.0638909193324021,-2.88497698475372  
"Igsf9",1162.39474593972,-0.823695252258049,0.332958104417663,-2.47387  
056007745,0.013365811290985,0.0423475119518404,-2.60439721672972  
"Slc24a2",0.558696808128979,-0.539814244391325,2.57312247817178,-0.209  
789564612901,0.833831918064125,NA,NA  
"Parp11",834.455276098799,-0.631137210418874,0.14121424310657,-4.46935  
943949065,7.84541954691003e-06,0.000140597417578724,-5.5979408787628  
"Arap2",1181.98542539798,0.714833958405648,0.211447331844658,3.3806714  
5217423,0.000723089470696756,0.00458349924558087,3.84958998722702  
"Acd",1109.88934992422,0.247675667218508,0.184552744874326,1.342031880  
30158,0.179585659031263,0.306966001559706,0.292509490900638  
"Cramp1l",2124.17719816335,0.1025849276064,0.158679826636115,0.6464900  
40864793,0.517962044808334,0.65135272168158,0.0439785655550261  
"Hpf1",1387.04714482863,0.266136246620652,0.169724938828496,1.56804443  
977191,0.116870761522768,0.222078365478114,0.400461853516471  
"Acer2",3039.19344298186,-1.53225282589355,0.404372410986732,-3.789212

08337289,0.000151125853363188,0.00136862605149811,-10.103595341084  
"Dnajc22",2252.39049660783,1.77406495622838,0.630970672097754,2.811644  
08217301,0.00492890099357754,0.0196531107510787,6.97122309745486  
"Ccdc138",866.145502694916,0.581957808390532,0.274085771404915,2.12326  
895120283,0.0337313209369316,0.0860292080612547,1.42758231674579  
"Dnah10",46.4815870852649,-0.236965134219436,0.435880630249298,-0.5436  
46855984186,0.586684509589786,0.710171773199778,-0.0811009390196107  
"Wipf2",2434.61043919344,-0.109710696599941,0.198701799387206,-0.55213  
7408610729,0.580854213766355,0.705374654958669,-0.0382919066398269  
"Fam120a",9667.48772472052,0.10229585831828,0.0736818332576163,1.38834  
572642376,0.165031794480867,0.287778071785476,0.127416210325031  
"Prm2",0.305058504246225,-2.03044571567107,4.74850910443877,-0.4275964  
66809566,0.668944938738351,NA,NA  
"Rapgef11",557.066310654643,-2.01994362834953,0.59905127844033,-3.3719  
0437788328,0.000746503615872261,0.00469223968480895,-10.8306251808019  
"Mindy4",496.634419013425,0.567163992145928,0.236319465887626,2.399988  
46483355,0.0163955885056127,0.049409557070517,1.70580889442204  
"Atp6v0a2",3369.77720539156,-0.10504313613115,0.116109833766678,-0.904  
687679962003,0.365630869763863,0.510605264192508,-0.0706056330788293  
"Dennd4c",1397.07676313173,-0.388279966292701,0.158753547430286,-2.445  
80340142136,0.0144529786883016,0.045059797558573,-1.20357658630771  
"Phf2",2144.87352025954,-0.620181748572059,0.202170775365609,-3.067613  
24652641,0.00215775683829726,0.0105947979937346,-2.82020961728234  
"Kcnj9",34.3095598856848,-0.74430932559389,0.532562964274104,-1.397598  
73578216,0.162233598216282,0.284309787706369,-0.936111016110281  
"Tigar",490.397160454314,-0.229219942957101,0.21633858411686,-1.059542  
58641761,0.289352745176052,0.43321813909565,-0.191745666697977  
"Igsf8",1537.54819778771,-0.181840884790977,0.151103624561731,-1.20341  
84177805,0.228814444187477,0.365393243290407,-0.183073970829602  
"Socs1",242.582754889455,-0.918827065866402,0.362700621609127,-2.53329  
333098469,0.0112996350808213,0.0373044843897483,-3.02169303571824  
"Gcc2",1596.68977347388,0.173644092167539,0.124888313310278,1.39039504  
630133,0.16440894989614,0.287012776889152,0.216747512589827  
"Ptprd1",1642.58960618863,0.922706115523204,0.220512056666686,4.184379  
43698433,2.85946154675484e-05,0.000375952671872056,7.2765040665657  
"Cct8l1",4.52341327234767,-1.46054345746048,0.870397735408036,-1.67801  
844840024,0.0933434975921245,0.187109233684717,-2.44796240394018  
"Sult6b1",2.5024041309472,-1.72132736394179,1.33652855101025,-1.287909  
16036974,0.197777586374785,0.328808610090003,-1.91459701875734  
"Mrm3",531.466174980746,0.9637682586906,0.2362122434804,4.080094429019  
6,4.50174095832175e-05,0.000535539629074786,7.25932965277413  
"Haus6",546.006449251206,-0.166891819890386,0.170574874459427,-0.97840  
7988980128,0.327872578527219,0.472624052659439,-0.125077912413446  
"Dexi",706.990281646305,0.278938627238589,0.147388372337219,1.89254160  
83732,0.0584188553191972,0.130910336859408,0.56714991128521  
"Kmt2c",3802.14207405618,0.0224262775981166,0.177414449603057,0.126406  
150391317,0.899410433898256,0.938343658844678,0.0014271863967602  
"Dbil5",12.5044703666675,0.577470229345819,0.446584399253,1.2930819578  
8243,0.195982714496713,0.326688122361024,0.64604442492573  
"Nod1",1454.77014620682,-0.630264944431568,0.160815676181761,-3.919176

03678895,8.88522027190912e-05,0.000900904965479376,-4.4194876127651  
"Smim3",561.822628303176,-0.377308089939977,0.198778858083515,-1.89812  
98794938,0.0576789749818115,0.129789342665362,-0.770403725288235  
"Dlec1",1760.77582676152,1.29864004120426,0.420453023376881,3.08866857  
651348,0.00201055591698188,0.0100363080566597,5.97575182962478  
"Clnd22",54.8667780539272,-3.56079820012192,1.02980819052976,-3.457729  
53921658,0.000544747962148086,0.00369700513956261,-19.9412967694683  
"Mturn",3321.41191968884,1.22618266456076,0.251561580817659,4.87428430  
277492,1.09203628158416e-06,2.97797530326264e-05,12.7788855879169  
"Csf3",12.322520262083,-0.995970191667351,0.679072600130295,-1.4666623  
1486332,0.142467939240158,0.257660688183341,-1.35064685140904  
"Rnf144b",871.149903613015,-2.24462999647643,0.494162468742487,-4.5422  
9153053331,5.56460146501473e-06,0.000107851490422323,-20.5041459046032  
"Cdkn2aip",731.080257330455,-0.341720587012108,0.129790366091186,-2.63  
28655762634,0.00846678499586197,0.0297290426524971,-1.2013634356908  
"Cntln",593.823674817939,-0.42584063892021,0.171462027031235,-2.483585  
70287189,0.0130067032251102,0.0414116099743955,-1.35595920881162  
"Npy6r",114.998491748359,0.13102333411332,0.554661363842691,0.2362222  
10437741,0.813260245707378,0.88113737890656,0.0165799192812658  
"Galnt11",12052.3165046824,1.94041252726377,0.478208254213845,4.057672  
59382365,4.95641860181573e-05,0.0005752395827274,14.4768821924021  
"Fkbp14",783.739934002782,0.0339028739485302,0.154260297004919,0.21977  
705609791,0.82604478934725,0.88881525868841,0.0039959918372831  
"Kcna6",90.1903718299424,-0.768470751194922,0.437589037772513,-1.75614  
717202862,0.0790632822996869,0.16480392113313,-1.38555189488461  
"Tmem237",951.378213400214,0.763104458922925,0.216467843803453,3.52525  
550915453,0.000423074508940109,0.00302608465712188,4.42637649199671  
"Kdm1b",1447.4968027887,0.448282931801283,0.14891037546471,3.010421069  
73616,0.00260885744262285,0.0122189532587702,1.97458185880966  
"Opa1",3721.08250926974,0.115007892198536,0.260981065651209,0.44067523  
4088589,0.659448128365956,0.768416877241344,0.030295710668003  
"Cnbd2",303.432708902386,0.108305401884881,0.328241637130162,0.3299563  
17643922,0.741432968803938,0.831691406382418,0.0199600154552035  
"Hspb2",176.903354028492,-0.277111755265104,0.351427458952422,-0.78853  
1881063456,0.430385657975751,0.572848628521483,-0.154388317137583  
"Hsd3b5",2.26684180167208,0.31280997605495,1.49099091283233,0.20980005  
5360986,0.833823729853016,0.89375155694601,0.0351371447357317  
"Atp13a4",4.31974455916284,-0.0348209947047919,1.04760930252137,-0.033  
2385314076396,0.973484371466894,0.983749354293898,-0.00057051189976721  
5  
"Sbno1",6692.08289876059,0.819893137282395,0.313090042188733,2.6187135  
5457596,0.00882620268278462,0.0307281450191073,2.85534038260948  
"Trappc11",2206.71762856231,0.264513297984858,0.108324819774365,2.4418  
5310934119,0.0146120906966051,0.0453745093808577,0.81808799740653  
"AW551984",7.21252187860876,-4.16779193750617,1.42933516212846,-2.9158  
9547919594,0.00354669294669982,0.01535977282463,-17.4047130574322  
"Ano2",3.4805393514348,0.0879435445889339,0.702679878440634,0.12515449  
3941246,0.900401242472554,0.939025643224746,0.00553274746345921  
"Phf20",2558.65246744864,0.180417120666229,0.316793089713404,0.5695109  
09563867,0.569009469239607,0.695975574382652,0.065390509949341

"Cdon",756.291780321688,-0.888773982083031,0.160957546184027,-5.521791  
3241972,3.35560875344524e-08,1.99474571569132e-06,-11.6651531613565  
"Fam210a",2802.3704482392,0.386223349569706,0.312241462597195,1.236938  
06183566,0.21611007813787,0.351365780706656,0.40396161776865  
"Tbc1d32",696.040074963568,0.401879979846583,0.162258578502074,2.47678  
725868689,0.0132570895805279,0.0420782569821151,1.27324585069469  
"Mphosph9",601.610625679797,-0.0514461373846656,0.138228631816034,-0.3  
72181484463613,0.709757730746611,0.807448289520825,-0.0110031076446485  
"Cc dc50",5740.21245859755,-0.0855279684392448,0.0803379453114568,-1.06  
460238816996,0.287055898658279,0.431044297820934,-0.071975584165736  
"Camk4",24.5232268361024,-1.39619907767822,0.531238860404858,-2.628194  
55002628,0.0085839407053011,0.0300084645805516,-4.89545901631015  
"Rbm24",147.127623922257,-1.56345068536197,0.551895687755887,-2.832873  
53035727,0.00461316335386531,0.0186404832747525,-6.22631656437705  
"Crygn",11.5214289241168,-0.851000777944596,1.25447676635899,-0.678371  
095237221,0.497536431269551,0.63322228047609,-0.388850989047956  
"Tmem181a",1717.26297079445,-0.448406392426412,0.101647255906696,-4.41  
139692780307,1.02705842754771e-05,0.000175048821855991,-3.878915122723  
38  
"Stox2",1287.71302189737,-0.0397550521402373,0.282625259867468,-0.1406  
63478412651,0.888135798168491,0.930645719183114,-0.00285745846020274  
"Snrk",5794.47180487707,-0.350913118881832,0.342695009519764,-1.023980  
82590577,0.305844331479312,0.450404288155863,-0.279891700960818  
"Notch3",1752.87308511721,-1.35973258529395,0.257493075175339,-5.28065  
690453246,1.28721535628992e-07,5.54979427405244e-06,-16.4551434043002  
"Cd84",986.794214281976,-1.23742822345851,0.435807745437225,-2.8393901  
5865139,0.00451998535974533,0.0183758704220839,-4.94565025004218  
"Cl dn16",553.261664289843,1.24243372286973,0.54986505952393,2.25952477  
130557,0.0238507612097299,0.0659073330594265,3.37880542734442  
"Ormdl3",3504.51979151471,-1.94644135604205,0.522408249793023,-3.72590  
087697357,0.000194618878826486,0.00165778894685837,-12.4616441208415  
"Prdm1",203.571598024299,-1.03234288673266,0.355942415818238,-2.900308  
70403437,0.00372795310386023,0.0159255425315413,-4.27372509564442  
"Gstp2",465.498769093682,-0.207063252866043,0.317045795557227,-0.65310  
2030582416,0.51369050328011,0.647484480765116,-0.0900022074200296  
"Spon1",3849.44515289976,-1.32218597668661,0.451357248476359,-2.929355  
80662522,0.00339665365794288,0.0148659827211157,-5.56465729952334  
"Atg5",1651.97784439017,0.312526648330445,0.139528522394958,2.23987642  
788753,0.0250989463494706,0.0686559001012877,0.837148945813681  
"Plekhg6",395.531575054685,-0.380188838532237,0.42230525142583,-0.9002  
7021271605,0.367976468943071,0.512999084187902,-0.253768909401953  
"P3h2",3942.51216826048,0.918137186287695,0.295055702836474,3.11174187  
606381,0.00185987043029277,0.00943876982036659,4.28120908387807  
"Pde4dip",3887.54413228389,0.714141702893051,0.178213195803732,4.00723  
245925931,6.14343905981132e-05,0.000677899121608382,5.21074355433686  
"Ttc39b",1268.91123777118,-0.575187417918005,0.171898428286364,-3.3460  
8887150385,0.000819601221359478,0.00505075367069124,-3.04171634470882  
"Enpp6",3420.91108173775,2.48334578966016,0.650090548470129,3.81999983  
772147,0.000133451761860854,0.0012444009817135,16.6113508149843  
"Fam126b",2243.30809864538,0.147930966735605,0.385350358063848,0.38388

6932086604,0.701062252357958,0.801108351197061,0.0328050337780511  
"Mylip",1896.64287294119,-0.758991473233228,0.179011481859823,-4.23990  
386173981,2.23615536601759e-05,0.000313447572441488,-6.12345094677478  
"Slc43a2",5114.36783572384,0.389207635852626,0.211860750459242,1.83709  
17454458,0.066196352550671,0.143746127857555,0.754948595245325  
"Slamf7",593.228871148664,-1.2956176608793,0.463109651341065,-2.797647  
72150068,0.00514762222325657,0.0203174773500115,-5.04808116003821  
"Spag4",60.9263607694816,-0.941760768301304,0.518600613400226,-1.81596  
539604265,0.0693756804756711,0.14912845196601,-1.79212106485085  
"Chpf2",3020.29310966559,-0.360674047594215,0.125046914754232,-2.88430  
984725281,0.00392272581078082,0.0165588456069722,-1.479064701044  
"Btbd10",655.916610939846,-0.397963299169903,0.166080577006333,-2.3962  
0614489272,0.0165657705951553,0.0497841237768709,-1.19391343522421  
"Scarf1",1272.97117003913,0.169692183458499,0.211899808038163,0.800813  
29487537,0.423239741167724,0.566469554728739,0.0964414882883912  
"Cer1",0.115127663772937,0.87947850337457,4.78471990596623,0.183809819  
730078,0.854162652365074,NA,NA  
"Hand2",2.59680805481168,-0.44634427969311,2.17428579661066,-0.2052831  
69484382,0.837350892850831,0.896217774522174,-0.0489067656140863  
"Rilp",721.141452850529,0.699765457795814,0.375543232907271,1.86334194  
435771,0.0624141724111466,0.137509749323647,1.3883769762384  
"Iqca1l",0.938199495798466,-1.8268124820516,2.6043234085545,-0.7014537  
73387364,0.483019873646879,NA,NA  
"Kcna7",1.63352904382893,0.0882916494848912,1.45005841813118,0.0608883  
396564675,0.951448135822282,0.969930765084564,0.00269559581830449  
"Hoxa13",19.0788958926362,-7.79121089671383,3.79397546965028,-2.053574  
39947602,0.0400169020383046,0.0979597684799577,-18.1005287696747  
"Asb10",26.8580447101141,-0.959623830328153,0.400578517547913,-2.39559  
484168637,0.0165934207745624,0.0498518518123909,-2.87762363029254  
"Prkab2",1558.6451348368,-0.754273075392032,0.214384575310602,-3.51831  
783746212,0.000434291866217666,0.00308862728392595,-4.35971989627994  
"Fbxo8",2058.75593030736,0.737209383353089,0.243424204808661,3.0284966  
2765688,0.00245773820320313,0.0116709643171102,3.2810618295869  
"Pgap3",700.673472510605,0.378921329454423,0.154082756855477,2.4592065  
7955151,0.0139244469003759,0.0437689610935886,1.18558056102887  
"Hoxa11",438.760635393171,-1.15528724127658,0.271000495204273,-4.26304  
476088045,2.01660103402317e-05,0.000290783946044037,-9.40742315871959  
"Mfsd14b",2239.65117888557,-0.201842387916571,0.13072896222824,-1.5439  
7605913963,0.12259413255067,0.230216738560431,-0.296452792350694  
"Tapbpl",1080.76328195319,-0.639647188151187,0.214445759494917,-2.9827  
924303924,0.00285631636253035,0.0130183395130006,-2.77696186168098  
"Bend3",506.03451447228,-0.0301076495746544,0.167239128533279,-0.18002  
7544024562,0.857130944458181,0.909267636291926,-0.00286371313857385  
"Cep44",679.183845473977,0.322710016147904,0.155056876009528,2.0812364  
111352,0.0374122723085117,0.0931033165885592,0.766128252410182  
"Pnmt",0.0904006337861851,-0.0578135967474291,4.78471990596623,-0.0120  
829636600753,0.990359424431597,NA,NA  
"Tlcd2",517.914273787712,-1.4338690627805,0.526716908781553,-2.7222764  
997187,0.00648338717240637,0.0242635476175776,-5.33224381259895  
"Serpinf2",9436.5533839703,2.04425939210184,0.823652897657431,2.481942

81585843,0.0130668242968599,0.0415690879654389,6.50155943410879  
"Primpol",604.78105824111,-0.222255868757561,0.15904403321626,-1.39744  
864527768,0.162278699508158,0.284337714145405,-0.279507338737925  
"Hoxa9",2884.43419309721,0.421225955733158,0.163525289989535,2.5759071  
0134265,0.0099977503532062,0.0337676440200367,1.42721977647092  
"Gask1a",27.5348094600182,-1.56451967180845,0.479694326203726,-3.26149  
296821994,0.00110827181292553,0.00637060253786024,-7.91030724672275  
"F11r",5964.39196340034,-0.0608798404788998,0.112607382961222,-0.54063  
8090309447,0.588757058215812,0.712177251758292,-0.0206643498567673  
"Hoxa7",3429.30029086706,0.99701546384908,0.17954090927897,5.553138100  
13028,2.80586226808749e-08,1.75735172875028e-06,13.2121523962689  
"Hrc",68.2187054484032,-0.129144443440901,0.344831163626084,-0.3745150  
0056688,0.708021198462886,0.806372100212635,-0.0277931731176846  
"Pdss2",641.237804782919,0.309694049917206,0.25468860036154,1.21597138  
418282,0.223995823044397,0.360084966420947,0.316326227755979  
"Cep250",2923.32890113569,-0.16183746132991,0.18178130526245,-0.890286  
60618458,0.373312011134908,0.518472654256602,-0.106305848384653  
"Aox4",6.11743934162624,-0.827907184793878,0.874880171227172,-0.946309  
234134994,0.343990884873791,0.488608892931389,-0.59294126373778  
"Mical2",843.049360389549,-1.36011941254526,0.247733696534235,-5.49024  
792175297,4.01369949652969e-08,2.26182406888254e-06,-17.6806532698788  
"Fam50b",2.39084529705107,-4.15160486791209,1.68686790183021,-2.461132  
17484766,0.0138499331863483,0.0435839246719529,-13.0072557802422  
"Sobp",166.917279410045,-0.4302995104153,0.32679627487392,-1.316720977  
25506,0.187932169429601,0.3168444504253,-0.49456229741945  
"Usp38",1229.88063745037,-0.0236887169023033,0.137944608013082,-0.1717  
2629828385,0.863652709896156,0.914097304177355,-0.00212767917938914  
"Ncapd2",778.253554994094,-0.0302890050857201,0.199791328992856,-0.151  
603201392204,0.8794999082509,0.924763448232804,-0.00236912437361688  
"Hoxa5",2128.73961596755,0.304006734757454,0.282610554191145,1.0757090  
6411315,0.282057392404391,0.425991869643751,0.259419592548788  
"Bcl9",1553.03778028372,-0.417866897848993,0.188480945343517,-2.217024  
62860322,0.0266214085858445,0.0719147974548591,-1.09993984865288  
"Gfra3",0.097334754584379,1.42101320893202,4.78471990596623,0.29698984  
2009374,0.766474264357238,NA,NA  
"Gdf5",31.3207459848072,-1.39072557752242,0.52377217517631,-2.65521087  
876476,0.00792588435415417,0.0282779310406767,-4.95887347722338  
"Trpm4",1195.65263111248,0.0908067744846352,0.249018684911454,0.364658  
477402707,0.715366357484215,0.811272799291992,0.0189923192865141  
"Sema7a",1253.11727300596,-0.648458423420478,0.177977612324766,-3.6434  
8310414007,0.000268973316071421,0.00212669980403916,-3.9900839234038  
"Slc22a23",2176.28911973542,0.489210276557752,0.386548624691754,1.2655  
8535022046,0.205661573701576,0.338595741284583,0.529789479796943  
"Ovca2",1353.85097186491,0.250671778529076,0.100909873644247,2.4841154  
7330649,0.0129873686373043,0.0413703175445449,0.798437649047719  
"Iffo1",1883.54964511599,0.165668692826649,0.181283530226105,0.9138651  
07437061,0.360787730138828,0.505973439875808,0.112865292835532  
"Fau",15883.2684488095,-0.110866908010535,0.235374964440704,-0.4710225  
16239038,0.637624655813963,0.751975173232967,-0.0316028305245867  
"Asic3",31.7874447773765,-0.0188396075751826,0.680842875232299,-0.0276

710064253145,0.977924548366188,0.985964778119031,-0.000266291202813549  
"Nop2",1429.19083992708,0.131968132204798,0.122826671711207,1.07442569  
570789,0.282631930950093,0.426562225378505,0.112436456029372  
"Ostm1",1498.85024617888,-0.182539329280957,0.277585790842193,-0.65759  
6084897336,0.510797710968921,0.645005748881032,-0.080042774719202  
"Bphl",6631.27784651938,1.87136414644779,0.414921729073366,4.510161833  
71996,6.47781885315957e-06,0.000121097326940465,16.8776760063085  
"Smg6",2543.63305759946,0.115775697111144,0.159820670361563,0.72441003  
3127905,0.468814042058251,0.606949482192152,0.057807930533376  
"Snx25",730.155580678966,0.702623371472261,0.233210870637449,3.0128242  
716634,0.0025882874715481,0.0121437558691238,3.09922964765982  
"Ccdc155",7.40512941303651,-2.56051991285824,1.14433626216608,-2.23755  
900910761,0.0252498271740384,0.0690008591786127,-6.84589904375439  
"Atg9b",114.181827202149,-2.20170995456737,0.544550543980521,-4.043169  
1399543,5.2733550748221e-05,0.000601301361596591,-16.3287932256321  
"Galnt18",1287.63576715267,0.526519936325062,0.182668956378553,2.88237  
228023536,0.00394693107881243,0.0166404899589003,2.15658164179281  
"Pdzk1",29545.7107949054,2.01842239008036,0.738892528959094,2.73168601  
788921,0.00630111591072269,0.0237454886021011,7.54963186135385  
"Wdr36",1228.36182409711,0.0308297907881455,0.135368229908373,0.227747  
609679268,0.819842457718291,0.884533435181012,0.00378266009784193  
"Snx10",1464.07040486309,-1.77119735598499,0.395360158615485,-4.479959  
1395035,7.46573298433032e-06,0.000135034194553314,-15.7813374788374  
"Afg1l",1178.17140428484,0.302364569740762,0.340094266591224,0.8890610  
61720834,0.373970264133216,0.519164984697006,0.198210121835177  
"Cd160",35.2246397093497,-1.10832369313999,0.658120312011403,-1.684074  
58774923,0.0921672548216014,0.185456876626582,-1.86745104885281  
"Spats2l",704.301564432486,0.00619142996491041,0.213786040926604,0.028  
9608710562914,0.976895797867732,0.985334462293851,9.14730519733231e-05  
"Edem2",2036.06153672515,0.0829723699311068,0.0848249889829685,0.97815  
9513203902,0.327995437171281,0.472637279873301,0.062181737170482  
"Kcnh2",395.451563314738,-1.42675461714077,0.276803716728689,-5.154391  
11151536,2.54456365100649e-07,9.30842440287515e-06,-16.5283682946894  
"1700066M21Rik",427.361085765755,0.0426498583669091,0.0960276894391301  
,0.444141253590653,0.656940462126323,0.766456745484625,0.0113438819530  
64  
"Trpc4ap",4916.95332995678,-0.104758638758495,0.0944679447300955,-1.10  
893318424362,0.267459007014688,0.409563734807471,-0.0935141342717277  
"C87499",0.425166218019242,0,4.78471990595279,0,1,NA,NA  
"Satb2",413.090229150263,1.48765013319057,0.480312954074208,3.09725174  
091542,0.00195323924122189,0.00981553059931555,6.87858090585448  
"Sesn1",1385.99282541262,-0.46541031878214,0.131972529846294,-3.526569  
65297396,0.000420980416304626,0.00301663952852172,-2.70106082074107  
"Tsr1",1006.58302130706,-0.338485258961427,0.116030066200854,-2.917220  
25199477,0.00353166291134997,0.0153227332989546,-1.41433280292468  
"Mlxip",2482.22849117791,-0.490236735024404,0.156969694115121,-3.12312  
983590874,0.00178938792541217,0.00918183079951073,-2.29946945617763  
"Txlng",1735.23401486376,-0.213251947036921,0.359335847382109,-0.59346  
1377679233,0.552872423127014,0.682574970311563,-0.0814372743845281  
"Zfp384",3137.65415778356,-0.0736708616821724,0.141813164077556,-0.519

492405104809,0.60341740781462,0.724784859087627,-0.0237132074765098  
"Tcte2",120.553832573039,0.540576881543869,0.316665251121715,1.7070925  
2003179,0.0878048571940326,0.178595775669648,0.931214095779719  
"Plcl1",759.090502715952,0.339707813948733,0.217516875295986,1.5617538  
3397943,0.118345991299551,0.224073619961025,0.508128364765419  
"Sgsm2",1637.60552309485,0.209792725275935,0.175901176114872,1.1926738  
0644988,0.232997147885963,0.370281065244153,0.208427588472399  
"Arl5c",199.253879182923,-1.26455649240156,0.397160176000012,-3.183996  
20308739,0.00145256917692955,0.00784707079166669,-6.13008297587356  
"Ankrd35",149.967199259381,-2.25750817099814,0.528188173412428,-4.2740  
604289059,1.91944977108521e-05,0.000279711746163075,-18.470369652181  
"Camp",0.853483320595862,1.84040262611233,2.25509661219129,0.816108106  
483296,0.414438307904568,NA,NA  
"Fbxo25",947.519050078803,0.183111227322039,0.126855288802427,1.443465  
45619575,0.148889396673934,0.266530063932094,0.24212215871654  
"Lasp1",9092.28976331761,-0.38313860140113,0.092578296932054,-4.138535  
85665252,3.4952925201967e-05,0.000439969099798549,-2.96120394480737  
"Focad",431.847367524039,-0.318309823284914,0.211220337100915,-1.50700  
36704507,0.131809716383166,0.242546795964418,-0.450905158769573  
"Ncoa6",1694.55761886913,0.292616689011601,0.151263019422546,1.9344892  
7655074,0.0530529992613408,0.12159719990568,0.616555459586938  
"Pcp4l1",1116.82158418967,-0.474311822454531,0.183926782853365,-2.5788  
078011057,0.0099141930891062,0.0335427619037641,-1.61025741775062  
"Sbf2",2697.14901359,0.228042905410445,0.219820107950975,1.03740693941  
113,0.299546245620984,0.443912191009953,0.185200143642556  
"Gmds",653.502732280562,-0.0924869459147217,0.231151561896235,-0.40011  
3869687973,0.689072649077613,0.79153637985833,-0.0216215461953316  
"Rbm8a",3620.33317561466,0.32084570832699,0.18408520841666,1.742919548  
43425,0.081347668854054,0.168413341188824,0.571533355232785  
"Trp53inp2",9164.177772661,-0.0240715231014101,0.234253599843872,-0.10  
275839140766,0.918154729232439,0.949818596698541,-0.00123930463734781  
"Ttk",53.5499472727778,-0.622759628147005,0.422143226616294,-1.4752330  
2254251,0.140149906213918,0.254554529236979,-0.852084761704331  
"Pigu",1248.89128009902,0.0912092273887789,0.143608115166987,0.6351258  
58192076,0.525346333552185,0.65797014208407,0.0381797927072975  
"Setd1b",2038.47469779213,-0.14125020650464,0.176562096650636,-0.80000  
299715591,0.423709060667377,0.566864228413099,-0.0801786259429605  
"Ras",2703.99024707614,-0.845083864249892,0.168450229101095,-5.016816  
354359,5.25347398181993e-07,1.6389157711604e-05,-9.31188661158285  
"Mpp6",3604.50390630726,1.21278592350621,0.239201301468896,5.070147679  
20866,3.97507135740985e-07,1.32488788592782e-05,13.6215234962741  
"Gpr162",469.102458748163,0.314575327269015,0.395108521461064,0.796174  
494302864,0.425930620173245,0.568862681810383,0.177457040269978  
"Txnip",34459.4537177032,-0.0201813700153066,0.211245220550281,-0.0955  
352739471946,0.92388967382102,0.953104226982415,-0.000969331667061563  
"Upf3a",2639.79885061791,0.311842273511228,0.150364521047237,2.0739086  
011737,0.0380878000879181,0.094442484103661,0.735874252911225  
"Pmepa1",7992.76456715159,-0.968378380590659,0.292482914518077,-3.3108  
8871357239,0.000930001861046273,0.00555790211755689,-5.02833820731615  
"Foxf2",8.12940102826827,-3.77460111466863,1.38463747851708,-2.7260573



0614136,0.00640958690024278,0.0240473591265987,-14.0706941758681  
"Hjv",12.5125747801014,-0.508349851275747,0.496470999314842,-1.0239265  
7774029,0.305869955679669,0.450408005123646,-0.405460567783797  
"Scaf1",4939.49956601872,-0.182448219518331,0.177684660820778,-1.02680  
905980037,0.304510382471923,0.449220204088488,-0.146002742532617  
"Higd1a",2582.12784699678,0.29552496834957,0.331622649478486,0.8911483  
24200163,0.372849602991391,0.518162620037502,0.194297662488371  
"Foxq1",2619.3781401074,-1.52423725513181,0.501615213991725,-3.0386583  
4331922,0.00237634186150007,0.0113949260624006,-6.82033236662975  
"Cdc16",2023.98812044821,0.262756416167383,0.124789450232675,2.1055979  
9468194,0.0352392870026648,0.0888638926510553,0.636041154802031  
"Fig4",839.470092522276,0.168110074974152,0.16107936894814,1.043647464  
42653,0.29664852432388,0.440992141450672,0.137636463041723  
"Egr1",3759.0033694541,-0.11832809272892,0.28539494840265,-0.414611728  
032327,0.678426161252987,0.783460867810397,-0.0288760971623731  
"Fcr1a",97.4215486630421,-1.99081365011785,0.520435056015461,-3.825287  
37660344,0.000130619627529565,0.00122487520347775,-13.348238922575  
"Hdhd3",510.243925981665,0.858872885512832,0.293078811768374,2.9305185  
1933813,0.00338396822548371,0.0148237727388185,3.61716301511513  
"Poli",647.27226479942,0.489661947526749,0.204684419039377,2.392277584  
31651,0.0167441732336238,0.0501810466814012,1.46512626821531  
"Usp5",3948.58470484686,-0.455321752072791,0.203185174353784,-2.240920  
15335719,0.0250312475563252,0.0685572783892723,-1.22030131765513  
"Mllt6",8631.75869819701,-0.0802164887862398,0.154470454254876,-0.5192  
99882771646,0.603551635114743,0.724786357979485,-0.025819950748705  
"Cdc40",1443.00788551144,-0.0535898679065749,0.0964749613483788,-0.555  
479547828556,0.578566695517543,0.703473025018774,-0.0188489363280633  
"Spsb2",1824.69164645359,0.750001491016508,0.188887422741513,3.9706269  
4874536,7.16837475512492e-05,0.000764600497677384,5.38212851412105  
"Srcin1",2770.0515575073,0.999885663632757,0.478728194951677,2.0886291  
5152446,0.036741118934041,0.0918433765353759,2.38739758409491  
"Dennd2a",628.548232653104,-0.975080600777851,0.231509462969905,-4.211  
83906812745,2.53299984148703e-05,0.000345373642722476,-7.7722540714064  
6  
"Tmem255b",42.3872672646524,-1.50697490507445,0.401159203092572,-3.756  
55074957037,0.000172271349154914,0.00151030072091436,-9.78847486530953  
"Abhd17c",4212.24917315802,1.15075414119424,0.289407215026631,3.976245  
51650636,7.00118446909258e-05,0.000751288358714184,8.27820424695693  
"Uqcrfs1",14254.7441042928,0.567452525428592,0.45592483853211,1.244618  
58067561,0.213271987105706,0.347690401721326,0.599481160597379  
"Olfml2b",332.11532268726,-1.85618213064007,0.318287623541032,-5.83177  
602066195,5.48405009709232e-09,5.06767814185337e-07,-26.9057551619036  
"Chmp4b",6833.55828651651,-0.246747902394044,0.13399982850693,-1.84140  
461329981,0.0655622872679994,0.142679666839807,-0.480455980943564  
"Nos1ap",218.189330617126,0.373397810146669,0.466421776145568,0.800558  
269882608,0.423387417263967,0.566589420851945,0.21213489945941  
"Cdk19",1570.64807060164,-0.328027965073109,0.0807024780270209,-4.0646  
5790261457,4.81029640679385e-05,0.000562784417053428,-2.45450661805027  
"Tfdp1",2155.09991365035,-0.51260994622162,0.116654457838145,-4.394259  
3855509,1.11151037489524e-05,0.000185868175726479,-4.40356183497302

"Socs7",2688.74174542828,0.473993613832818,0.118293195946461,4.0069389  
4556156,6.15107552849916e-05,0.00067797439601287,3.45844749442508  
"Sv2a",916.630964596484,1.01247920922432,0.354872928592687,2.853075362  
04436,0.00432983519891271,0.0178070294681291,4.07843026191129  
"Polr2l",3424.57113047933,0.420893493710845,0.274419444863069,1.533759  
73018554,0.12508877326504,0.233708403710401,0.611844907951079  
"Otud7b",3191.7986982977,0.105874374121859,0.103021170526412,1.0276953  
1331151,0.304093173110569,0.44884244430809,0.0848141989747301  
"Slc19a3",410.155689566005,1.81226308789077,0.431538442768811,4.199540  
31502509,2.67457408609885e-05,0.000356695249868367,14.3868839111181  
"Tmco3",2479.28195851921,1.33739947875069,0.234775133238763,5.69651248  
963651,1.22282937561425e-08,9.32213774251015e-07,18.5707328597712  
"Prr3",1104.27054085243,0.179469007751535,0.174986885697907,1.02561404  
550834,0.305073544285118,0.449767416407745,0.143400166894055  
"Ptov1",5571.58526364793,0.162090611837034,0.159005376749393,1.0194033  
3811795,0.308011522048377,0.452843361250133,0.128409640572661  
"Mesd",2575.06652886177,-0.519403545133496,0.189532404676184,-2.740447  
18643705,0.00613556417700409,0.0232655057026888,-1.95336426019693  
"Dcun1d2",1423.17810816634,0.78822288104484,0.175746547055268,4.48499  
444974362,7.29158326084066e-06,0.000132581880464041,7.03749304559223  
"Parp12",1850.17123178281,-0.459530504282427,0.133137619342103,-3.4515  
451496969,0.000557386491817936,0.00375773821588713,-2.5659898638189  
"Gdf15",726.254699137377,0.572252436005296,0.483599029610628,1.1833200  
6676285,0.236682322892261,0.374800420683702,0.561586569748114  
"Rpf2",738.793508044641,0.708229063336147,0.128121808173165,5.52777917  
697609,3.24309895172327e-08,1.94619501646229e-06,9.31295322968702  
"Grtp1",1562.55795203988,1.66800420581577,0.356583164397922,4.67774245  
212092,2.90050527039261e-06,6.44123596379443e-05,16.0965825660563  
"Tbkbp1",1196.73884462276,-0.850790606422439,0.20515313083445,-4.14710  
028046802,3.3671260980887e-05,0.000425879091789407,-6.60328799012841  
"Jarid2",2505.98057366386,0.410594857089843,0.178848453325189,2.295769  
68352801,0.0216890537186507,0.0613155240548429,1.14626678631571  
"Tbc1d17",2910.72405777739,0.429509243309038,0.170693223359057,2.51626  
417766776,0.0118606243412932,0.0386722086841845,1.3970363933457  
"C1s1",5253.66611137314,-1.48660286663024,0.23276658948236,-6.38666773  
412902,1.69539455791257e-10,3.71424753822238e-08,-25.4335520314867  
"Mfsd4b1",3852.87524073167,1.86760428120216,0.482826760593325,3.868062  
90294916,0.000109703368870141,0.00106629924537887,12.7810643351888  
"1700003F12Rik",12.4890423932106,-1.22561378564171,0.694046172813556,-  
1.76589661271852,0.0774131955954256,0.162057385411167,-2.2303778200803  
9  
"Fchsd1",841.827221333008,-0.265445465123178,0.212816277240817,-1.2472  
9869615569,0.212287995358015,0.346607882556571,-0.281255704794462  
"Armc10",1555.20168903153,-0.2127614347408,0.119305657347801,-1.783330  
64391537,0.0745324959047305,0.157480993189254,-0.393278981738408  
"Car14",2595.70622724939,2.70554768958031,0.72570085845337,3.728185874  
4751,0.000192863112351596,0.00164642949414686,17.3402509065694  
"C1rl",1091.14070543031,0.898706232985698,0.396546186640742,2.26633432  
185769,0.0234309215224363,0.0650236418793713,2.45616804771319  
"Mfsd4b5",13490.2740312235,2.17614078898875,0.781733328408816,2.783738

02152992,0.00537364182575852,0.0210012564278692,8.40680836883612  
"Rgs4",416.169854255506,-0.961673941920007,0.289899234532371,-3.317269  
68327894,0.000909018275873273,0.00547714411093235,-5.00760110564073  
"Cbfa2t2",988.508115521959,-0.0860320280481735,0.12840727164931,-0.669  
993427499444,0.502861979999885,0.637710756815464,-0.0387032678313742  
"Osbpl7",1050.85585650029,-0.122247363367321,0.166742835562646,-0.7331  
49121249004,0.463467483095218,0.60251166438802,-0.0619364131847161  
"Zfp280d",2252.12401628064,0.868268255861698,0.364714257579972,2.38068  
086951964,0.0172806753659421,0.0514253065148257,2.57669448124584  
"Mc3r",0.210770221590303,-0.0573622969198357,4.7847199059595,-0.011988  
6426054719,0.990434676294085,NA,NA  
"Ubn2",5973.09621269254,0.49065127314112,0.260209574413831,1.885600382  
86985,0.0593488257715725,0.132461470340444,0.991833623067153  
"Atf5",2988.40264400401,-2.06735799193053,0.390613918794999,-5.2925865  
988291,1.20598330159324e-07,5.28410391336293e-06,-25.1200690055967  
"Tmc3",30.6942338043915,-0.173067417581201,0.381160007990479,-0.454054  
501923307,0.649789599442056,0.761348333028136,-0.0471893054355797  
"Srd5a2",130.995398439771,1.81646222928494,0.507273719391022,3.5808325  
167438,0.000342501157407038,0.00256948348100132,10.8334722496024  
"Pcid2",1197.21671202556,-0.000887169710988346,0.121085987792413,-0.00  
732677436227624,0.994154132158512,0.996250456664318,-3.33273330336224e  
-06  
"BC028528",371.42238057291,-0.890211709428875,0.231776884626532,-3.840  
81316332858,0.000122627423598922,0.00116519956400184,-6.01325805545352  
"Inip",762.853031791502,-0.607207103495133,0.133936341172929,-4.533550  
02964544,5.80005203177191e-06,0.000110980779701167,-5.52932110740949  
"Cul7",2596.89027656406,-0.0118466068037704,0.137001537586162,-0.08647  
0612027401,0.931092316753511,0.957120165603645,-0.000519193305295311  
"Ranbp9",2505.54730960111,-0.204593940478435,0.167028019359227,-1.2249  
0790026322,0.220609923453797,0.356498657066764,-0.211023265393042  
"Ciart",172.185617510338,2.12768967641957,0.383667729779739,5.54565711  
752995,2.92852224438699e-08,1.80697236459043e-06,28.1362658086114  
"Fndc4",448.7812308951,-1.03337308158286,0.359019825499544,-2.87831759  
748926,0.00399802409855226,0.0167796341480517,-4.22400483492885  
"Reep2",114.754987161768,-0.644100101646648,0.310870128395542,-2.07192  
664335736,0.0382722828232962,0.0948209855101526,-1.51734817199072  
"Sp6",152.105347202796,-0.576361275533072,0.172026206012371,-3.3504271  
7556431,0.000806870226760109,0.00498964658463958,-3.054939654448  
"Efl1",838.473773524308,0.0751400583643799,0.0799653397637603,0.939657  
83908834,0.347393097805255,0.49218650058181,0.0532666046409568  
"Ifit172",2304.16460462512,0.22827666421716,0.15893108320887,1.43632484  
979137,0.150909926172572,0.269280472986238,0.299499392537558  
"Cyp24a1",2531.47530687928,0.903938568314998,0.684760494907176,1.32007  
990390499,0.186808341550776,0.315576940179953,1.04256004198875  
"Rad9b",356.204916397598,-0.128348535190168,0.286886405713687,-0.44738  
4513988648,0.654597455139813,0.764729849030322,-0.0344272672102058  
"Saxo2",140.437345155111,0.275530140727892,0.272646276466389,1.0105773  
1027498,0.312218780059689,0.457339176140321,0.215555490484947  
"Bpifb5",0.681740913676252,-2.97059131358217,2.67321323191816,-1.11124  
368161631,0.266463473660649,NA,NA

"Susd4",635.542765482343,-0.227382288596338,0.295807921214717,-0.76868  
2216698617,0.44208198441427,0.583596109147558,-0.122455851404193  
"Susd1",509.992310583965,-0.263844851027697,0.271712466300299,-0.97104  
4334550677,0.331526201697483,0.476352091429442,-0.195666816552147  
"Sct",42.9074329997433,-1.32380025104522,0.530903835956191,-2.49348405  
754307,0.0126496264736705,0.0404729926130008,-4.24558675937626  
"Pptc7",2485.29942664165,0.585233139497985,0.0878031439207336,6.665286  
83786446,2.6414894151488e-11,8.72945095196124e-09,10.8599158341528  
"Pln",274.634863270609,-0.308113521280567,0.457301510705894,-0.6737644  
94687456,0.500461051137995,0.635617699745884,-0.139624106276643  
"Akap12",2280.46349046441,-1.54058243865782,0.217068491583243,-7.09721  
815184326,1.27293048188323e-12,8.99945481602099e-10,-32.0883093053325  
"Colec10",0.0983898136351888,-0.544048378937457,4.78471990596623,-0.11  
3705376621746,0.90947135024012,NA,NA  
"Tctn1",2095.346119703,0.287620538549594,0.194724241359872,1.477065908  
90263,0.13965797079817,0.253826539394363,0.394357717202181  
"Cep85l",757.961567294726,-0.553599552676183,0.206303527451951,-2.6834  
226225488,0.00728728362730377,0.0265733039396239,-2.00837512876251  
"Shoc1",6.20120816906198,2.27351109481886,0.701753382750221,3.23975794  
161306,0.00119631208839101,0.00673771971628047,11.3676321649163  
"Capn8",1.60744160601487,-1.91159461705982,1.37935222358693,-1.3858640  
196257,0.165788429312029,0.288645664320559,-2.37526224869579  
"Atp6v0a4",5696.39514849112,1.53618400471732,0.53296200947067,2.882351  
79509893,0.00394718771463298,0.0166404899589003,6.29208125738246  
"Slc35f1",187.353932892123,1.31227990026854,0.271608998884619,4.831503  
76334182,1.35505656813041e-06,3.47643328492193e-05,13.4730709360229  
"Ripor1",4119.48249710972,-0.165425640211401,0.199881466300402,-0.8276  
18704591562,0.407886471924777,0.551561857936702,-0.0984284682499013  
"Samd10",662.0867414459,0.272809030884168,0.187977310880338,1.45128701  
760093,0.14669995480821,0.263444196343503,0.363903707056962  
"Gng10",940.81933762844,-0.974935295924941,0.168272295036586,-5.793795  
67927668,6.8813168974653e-09,5.96319630519015e-07,-13.9732494248517  
"Dock10",2177.50685345592,-0.957211825380637,0.359502991362461,-2.6625  
9766505127,0.00775400642174646,0.0278071762389576,-3.42917418010217  
"Phrf1",2720.32735944903,0.0533598463712662,0.162024510862255,0.329331  
939268312,0.741904805320765,0.831876263309317,0.00982203076082354  
"Mcl1",11584.2275315273,-0.387486091928934,0.154835624089958,-2.502564  
21418761,0.012329725631224,0.0397429311221036,-1.24976791572662  
"Nfe2l1",11961.7779371876,-0.027400922313512,0.294837195190942,-0.0929  
357718783297,0.925954586865094,0.954645861606155,-0.0012718092282268  
"Rassf7",1279.97940866416,0.0506089492981729,0.190908734401444,0.26509  
4991367718,0.790936285662502,0.865511039277554,0.00730971116547785  
"Ensa",4370.09245753496,-0.0231945580471337,0.0825547532945625,-0.2809  
59691858972,0.778741316246583,0.856964866170182,-0.00358027388368696  
"Med30",785.668918455237,-0.10867290344553,0.242703100367424,-0.447760  
672529569,0.654325928912718,0.764595886488084,-0.0291686590289939  
"Tm6sf1",1310.85682912095,-0.822453021668276,0.252269871932953,-3.2602  
1104052751,0.00111329342816838,0.00639381303753375,-4.15538177133746  
"Nepn",246.726783022569,1.27774942431084,0.721918141896074,1.769936714  
64595,0.0767376837937555,0.160920970302649,2.3342461888405

"Polr3k",1308.78587444849,-0.659035004238189,0.253854291851767,-2.5961  
1527317812,0.00942844278180879,0.0323313009777889,-2.2616232406139  
"Zkscan16",3.86937843334453,-0.185383519191015,0.846208206562161,-0.21  
9075539274384,0.826591204783812,0.889354117143514,-0.0217380326755862  
"Degs1",4800.84710908261,0.202952556445685,0.173497690647178,1.1697709  
3867149,0.242093161677426,0.38076995163382,0.195962847610732  
"Lrrc56",459.953658218688,0.580448328289591,0.142050213925029,4.086219  
31816264,4.38459340974412e-05,0.000523199524499332,4.3856050124212  
"Akr1d1",1145.49098034789,2.07110092930869,1.05378798636074,1.96538673  
444289,0.0493694936754004,0.115249872075022,4.47492982955526  
"Ctss",8206.19601630151,-1.35498370400677,0.431977921059621,-3.1366966  
6422548,0.00170862801957014,0.00889344077030929,-6.39883095863539  
"Polld1",1086.42570088339,-0.148225280149276,0.357018987342399,-0.41517  
4781746608,0.678013958453181,0.783170388739344,-0.036226999079851  
"Ramac",2909.30318679287,0.137542597915371,0.191549118999639,0.7180539  
31198872,0.472724034100684,0.610478294069122,0.0678789969123261  
"Creb3l2",3916.36127127914,-0.116289391076016,0.132836358122846,-0.875  
433448487594,0.38133810677548,0.526283296001437,-0.0746479772319849  
"Rnh1",6105.11497882535,0.123959860951872,0.106738712258677,1.16133929  
601343,0.245503944921291,0.384652134925474,0.118433221964707  
"Sycp2l",0.783257822430065,-1.02493380893303,2.24582104347129,-0.45637  
3766695506,0.648121226704803,NA,NA  
"Ric1",1587.25658973193,-0.726025358059405,0.226511282067665,-3.205250  
31438621,0.00134945069317709,0.00740977302809772,-3.56112205182915  
"Fsd2",103.106756260122,-3.71090407209028,1.04236655889717,-3.56007590  
651838,0.000370747611539369,0.00273095463913661,-21.9058528431842  
"Herc1",3401.70517447519,-0.0031720665181911,0.204179594031241,-0.0155  
356686511275,0.987604828453759,0.99203126810527,-2.53786001000946e-05  
"Dgki",4.69363868921758,-1.95723834789713,1.07068787355908,-1.82801953  
420006,0.0675466199957793,0.1460137800122,-3.7658328164985  
"Lpar1",753.921187405787,-1.12464400437611,0.25559481489776,-4.4001049  
2711277,1.08198547405157e-05,0.000181866834250497,-9.68569937770466  
"Mybpc2",346.332885794451,-1.24638216474675,0.605836632249659,-2.05729  
08576336,0.0396582562484921,0.0972585748298112,-2.90454672052803  
"Arfrp1",2604.82025805578,-0.136567934924065,0.105561855464236,-1.2937  
2427496155,0.195760677299552,0.326457550973885,-0.152881705532473  
"Ucn",0.184866368983273,-0.551580421051654,4.78471990596623,-0.1152795  
63253822,0.908223536518323,NA,NA  
"Scube3",663.352790814889,0.119291921799612,0.41858798216478,0.2849864  
94792991,0.775654488684589,0.85488164718626,0.0187040481065105  
"Trps1",2135.45040250141,0.933926420645224,0.265131244745891,3.5225060  
7634089,0.000427487242016456,0.00305316712265086,5.4089056813134  
"Pak1ip1",2320.4698032633,0.0497410707124043,0.163295033116025,0.30460  
8595639661,0.760664272592996,0.845188726921585,0.00836621585741892  
"Rtel1",1073.85903585464,-0.00873149064947465,0.172292949843578,-0.050  
6781656324406,0.959581975588976,0.975491624610733,-0.00021666063052953  
6  
"Atp5j2",15062.4764044039,0.894462955735555,0.312351950391743,2.863638  
13196538,0.0041880616357151,0.01736682810999,3.62543127965558  
"Hoxb4",5218.82559718815,0.533242725915356,0.347455694598518,1.5347071

1289252,0.124855787877007,0.233407301248886,0.775852316894618  
"Josd2",2921.5749263376,0.607825891067351,0.22441051232025,2.708544643  
39861,0.00675790195897877,0.0250934245660194,2.23992924004552  
"Mapkap1",2181.55241733177,0.244957919203443,0.127455809146924,1.92190  
470440675,0.0546177497763942,0.124248849042135,0.510852116744665  
"Taf5l",756.599378171548,-0.393545491406293,0.13143841737447,-2.994143  
56371224,0.00275216412923489,0.0126919811238935,-1.71852850638714  
"Hoxb5",1701.00617257727,0.0551112493576908,0.290065825632103,0.189995  
664734354,0.849312527697742,0.903924435865205,0.00556676033324956  
"Dsel",442.013083532651,-0.831264255906335,0.216900184294422,-3.832473  
71877735,0.000126861155496543,0.00119841996602306,-5.5917079014042  
"Aspdh",2601.40387459808,1.84893346431906,1.00810364785968,1.834070800  
40287,0.0666434851677415,0.144540008209191,3.5762051400346  
"Gmeb2",1232.09874494708,0.0307300038519088,0.125239982290714,0.245368  
957179958,0.80617076300923,0.876804589613832,0.00404010827898955  
"Golga4",9552.34021358953,0.362840917142288,0.125987371585102,2.879978  
46591471,0.00397702333737971,0.0167206020153349,1.48442343480345  
"Mindy1",4370.40469576164,0.804132501188551,0.189119403845336,4.251983  
05852412,2.11885892712252e-05,0.000300461900807526,6.52166704657344  
"Atp5l",15353.9038717412,0.653755028770685,0.384514174970595,1.7002104  
7681969,0.0890913422980458,0.180647149763654,1.11871188074747  
"Pbx3",599.356578737075,0.160599912025215,0.184237365986045,0.87170108  
6072729,0.383371467620976,0.528117625807107,0.102532804609986  
"Hoxb7",1427.13989757294,0.349741771970533,0.239055932655187,1.4630123  
0881811,0.143464010908419,0.259125640082663,0.47230606128288  
"Bud31",3385.71633382734,0.377793246629635,0.15425481314166,2.44915046  
043127,0.0143193618023855,0.0447362468230913,1.17379274252238  
"Pkhd1l1",31.9368521078427,-3.84289505718635,0.833722313247,-4.6093225  
479595,4.0398317271761e-06,8.43740065777616e-05,-36.0473209052952  
"Pakap",8667.24792303253,-0.238278982954432,0.144215672858481,-1.65224  
055216423,0.0984855226835083,0.194990934330122,-0.389539008434149  
"Mboat1",637.865033930692,-0.363801136130937,0.220880989775789,-1.6470  
4593410335,0.0995486047182256,0.19665640271489,-0.591648776940213  
"Wdr26",7701.74481332985,0.0187658829024479,0.148032375213511,0.126768  
775245154,0.899123410055398,0.938238319905358,0.00119634924026263  
"Nudcd1",749.342448860316,0.0273265516080377,0.154932848514939,0.17637  
6745602807,0.859997972583285,0.911168856677111,0.00254210836785044  
"Shank1",667.99796912928,0.00694095631285299,0.335234074528056,0.02070  
4805508284,0.983481135601443,0.989469307634517,7.34806594180716e-05  
"Mvb12b",1640.18961238869,0.692174200087262,0.143490126530696,4.823845  
49252723,1.40816516286463e-06,3.58907246346857e-05,7.08442485391018  
"Angptl6",102.875119258638,-0.306739610766653,0.269635159280497,-1.137  
60984133214,0.25528343538601,0.396015309344929,-0.284133640239488  
"Nlrp6",6319.77940099186,2.18829601825922,0.838378571590385,2.61015261  
17349,0.00905018383389588,0.0312984186579109,7.58066816096844  
"Ptk6",18.9678471171426,-0.827684305326425,0.409024369876601,-2.023557  
43638485,0.0430157082206654,0.103673705672007,-1.87595207101882  
"Elov13",156.478350900617,-3.1575149372799,1.53004101047865,-2.0636799  
3776332,0.0390480727599086,0.0962405919191881,-7.39143952635627  
"Ttll6",16.1901834053048,-0.131990316599307,0.726478072603918,-0.18168

5203692679,0.855829778450111,0.908332100605316,-0.0126902377218298  
"Nup205",1107.72903002377,-0.496596933475546,0.141045977557773,-3.5208  
159925875,0.000430221049030644,0.00306931943432107,-2.87345855042263  
"Trhr",4.27788571912298,3.68829946709194,1.13790535017251,3.2413060247  
3465,0.00118983378549088,0.00671728246680935,18.4528263200004  
"Abcf1",5805.48787035544,0.340593755405623,0.222333666564224,1.5319036  
5035085,0.125546212598989,0.234348886828244,0.494182569609981  
"Alpk3",12.2602743598349,0.185572942255678,0.579799107209143,0.3200642  
08358188,0.748919657197858,0.836582999401546,0.0331116949532574  
"Ptprn3",2228.46001494526,0.168379841800638,0.140519298535181,1.1982684  
4821946,0.230812525676564,0.367618250746744,0.168499432126271  
"Lmx1b",310.922767876399,-0.413256126728682,0.522586887101991,-0.79078  
9315477082,0.429066945860016,0.571678782997034,-0.231083740022343  
"Gabpb2",2462.90929956807,-0.288456177193199,0.150650005921211,-1.9147  
4388221437,0.0555251743160464,0.125901831470435,-0.597754118273472  
"9130409I23Rik",1.03936123015701,-2.6299257009966,2.31651778144754,-1.  
13529268890533,0.256252704485828,NA,NA  
"Kdm3b",2798.31875118997,-0.226181216768528,0.136300337903398,-1.65943  
254615284,0.0970286625537457,0.192786251642618,-0.372333459255064  
"Ascc3",792.094720687994,-0.599318594309377,0.22921945409761,-2.614606  
14967771,0.00893303976339679,0.0310122302508766,-2.0816574002918  
"Vill",3707.98894093822,1.00218314780772,0.252030583223017,3.976434665  
15694,6.9956207220301e-05,0.000751104696245281,7.20967099682682  
"Ephx1",3251.37225748552,-0.357176444158399,0.212831305732301,-1.67821  
384607608,0.0933053596900176,0.187052285086372,-0.598758840530694  
"Sema6c",581.768117944382,-0.61714053934478,0.305565253468169,-2.01966  
857271967,0.0434177770533171,0.10448775820607,-1.39392630176985  
"Smurf1",1892.27387466705,-0.805942525189802,0.189083152508324,-4.2623  
7089078743,2.02269364977876e-05,0.000290844253564796,-6.56256645058213  
"Stap2",2284.63762187267,-0.284676909076453,0.249907199537658,-1.13913  
048364801,0.254648734740561,0.395313776271613,-0.26420165309149  
"1700028J19Rik",202.844097067776,2.22109695317224,0.411549820289655,5.  
39690905856549,6.77987303384574e-08,3.4070609385032e-06,27.96285665172  
08  
"Cnot4",1662.63808880971,0.326031936655555,0.192318531561665,1.6952705  
1817685,0.0900241148606318,0.182008522558337,0.5554611861736  
"Scgb3a2",1.56806805918591,-2.26857709206451,1.75496893319397,-1.29265  
940220138,0.196128884826235,0.326903829401772,-2.53647166176897  
"Lefty1",61.4053439668967,-1.53130290206564,0.383656219366809,-3.99134  
127055968,6.57006557052554e-05,0.000714462568288383,-11.0927275209301  
"Zscan2",487.530647916381,0.0748445909068649,0.21657053046106,0.345589  
913583937,0.729650927235443,0.822592297151585,0.0146167434895317  
"Scgb1c1",12.7334903808324,1.95068512982564,0.598850870442787,3.257380  
47000469,0.00112445604642245,0.00643706517708309,9.84253794074601  
"Ost4",4075.00970238856,0.0888569740444664,0.197083857906299,0.4508587  
10542963,0.652091383660162,0.763128131481054,0.0240206463151333  
"Six3",0.657037197293791,-1.46313384378166,2.39093360519449,-0.6119508  
46565913,0.540570278965137,NA,NA  
"Sde2",938.667043287066,-0.480867009566084,0.146992317027005,-3.271375  
12552945,0.00107025842469208,0.00620698951952592,-2.44380426577287

"Rap1gap2",1461.79736131763,0.416463745606308,0.187323818749314,2.2232  
2899664799,0.0262003625134347,0.0710507188159874,1.10128061483537  
"Gngt2",915.936510696823,-0.818546188820159,0.226206720018629,-3.61857  
59147772,0.000296228607637796,0.00228656587162381,-4.97733725344951  
"Trmt112",2357.37463003947,0.3771589610187,0.178590446057941,2.1118652  
7243645,0.0346980067853236,0.0878625631558753,0.917243603565731  
"Ctnnal1",2236.04687666352,-0.168294618188404,0.15294724552658,-1.1003  
4422397726,0.271182170401146,0.413674868050863,-0.148549444800818  
"Hace1",589.638192524442,-0.425538188126266,0.129312682091617,-3.29076  
917471078,0.000999138608152099,0.0058696006573515,-2.18640188212901  
"Abitram",464.215731286303,-0.558577545420862,0.21370603647038,-2.6137  
6587506119,0.0089550378027304,0.0310575110419134,-1.93933353425452  
"Tmem214",3471.79287218585,0.198101327000012,0.113370714032178,1.74737  
654861894,0.0805720426570788,0.167180343484912,0.354340307126157  
"Ralgps1",721.707238845946,0.303343290106797,0.123593939052378,2.45435  
409238184,0.0141137927905815,0.0442357710706894,0.945891574237517  
"Agbl3",663.677806934995,0.421760386178454,0.201647030685956,2.0915774  
695205,0.0364763297284182,0.0913336942397199,1.00937193280402  
"Vars2",1300.06505267387,0.181791469700272,0.154531057726764,1.1764073  
3438652,0.23943214228775,0.377645034001501,0.177028640096051  
"Gcnt1",14567.9418178233,1.85487241469271,0.60320284705528,3.075039223  
94903,0.00210474871366577,0.010381581183672,8.47254168976148  
"Kif16b",1605.88685087359,0.604244616240445,0.188272461623433,3.209415  
81700358,0.00133004988181051,0.00732165798857746,2.97102151730478  
"Phb",11428.8379427731,0.250556742514506,0.327399490850812,0.765293622  
978415,0.444096720514724,0.58538384644376,0.134170003445266  
"Ythdf1",2023.23914629365,-0.130498027404889,0.101267069603727,-1.2886  
5215430393,0.197519043118097,0.328599277923746,-0.145233378007991  
"Itpkb",3236.01682818888,-0.630253466286885,0.210572829337444,-2.99304  
268394903,0.00276211115986738,0.0127198024079108,-2.75080128850394  
"Baiap2l1",702.631232937855,0.612053419536957,0.240306185419055,2.5469  
7322280587,0.0108661770782244,0.036148903032114,2.03208386821541  
"Garnl3",289.030971229366,-1.0651915599889,0.365884989446332,-2.911274  
28212012,0.00359957880321995,0.015524143902701,-4.43690503363967  
"Pi4kb",1976.14792365819,-0.214722222501458,0.175078160366509,-1.22643  
636448977,0.220034508554277,0.355799705406477,-0.221891224573014  
"Zcchc2",1506.57417157748,-0.0929747124180129,0.120311724045074,-0.772  
781814540208,0.43965151764605,0.581489980400399,-0.0504073130593584  
"Bpgm",1492.05099589261,0.480496434980456,0.164598473383793,2.91920347  
195497,0.00350927084559586,0.0152569461621923,2.00978223763793  
"Zfhx3",2972.31130075393,-0.328370969530819,0.240137541326274,-1.36742  
871488245,0.171490966948502,0.296456323571406,-0.399251609305521  
"Rnf146",1621.11777201374,-0.400724966026475,0.143721722402441,-2.7882  
0041485718,0.00530017436946179,0.0208016907922234,-1.55189599415681  
"Nipal2",795.443986718756,0.459004364150875,0.234488349010042,1.957471  
94301419,0.0502920073268713,0.116946160865753,0.98504246630679  
"Mrps34",3263.45380009411,0.534502469699866,0.267392977819761,1.998939  
81531614,0.0456148661230174,0.108291569422451,1.18816049135879  
"Shfl",2213.50031350978,-0.390494656484823,0.296734559514668,-1.315972  
95954845,0.188183118658523,0.31718485888692,-0.448393503824356



"Man2a2",4503.04848367828,-0.797306024998134,0.213241726821847,-3.7389  
775297789,0.000184770239901783,0.00159197973380688,-5.13686485735987  
"Ctu1",386.328654291349,-0.317304557377891,0.12937768685359,-2.4525446  
7825636,0.014184976270879,0.0443946496516209,-0.988288298957328  
"Fam117a",678.118334024477,-0.500572756860781,0.200748042983352,-2.493  
5374184559,0.0126477252660838,0.0404729926130008,-1.60539708838596  
"Irs2",1515.37054514661,-1.19094466965519,0.399530958204791,-2.9808570  
404818,0.00287442944728803,0.013082545602993,-5.16450337497134  
"Zfp653",1110.07886329764,0.444886735193849,0.217555930897246,2.044930  
39265371,0.0408617210554634,0.0995528973059385,1.02638312506656  
"Rpl12",1334.50515720331,-0.444160826438379,0.15710828934207,-2.827099  
88313418,0.00469716742495066,0.018922597200762,-1.76216297525595  
"Pogz",2446.77464720825,0.165435150641214,0.181047167903873,0.91376823  
2646709,0.360838642081067,0.505973439875808,0.112706187293629  
"Ccdc68",534.76391204965,0.367561410789981,0.288926939449165,1.2721603  
9975619,0.203316134512628,0.335499152905147,0.401426992861738  
"Kat7",1478.95042934327,-0.751271100712671,0.209484891655512,-3.586278  
20257367,0.000335431105971196,0.00252423116767999,-4.49396755707822  
"Plcl2",1398.29680660559,0.13884985990818,0.316089321579295,0.43927412  
4207791,0.660462921128476,0.769369460877227,0.0364042091124175  
"Dido1",3259.23977214681,-0.0273679881680461,0.167478565900521,-0.1634  
11885102373,0.87019414570669,0.918523389276158,-0.00232594811548415  
"Soga3",2.53300372305738,-1.23271184675093,2.4359240012848,-0.50605513  
3945376,0.612817945691438,0.732107365056777,-0.384394195733663  
"E330034G19Rik",10.2756883510821,-0.0999921892724225,0.60963640658995,  
-0.164019386295738,0.869715882430772,0.918321253960533,-0.008520134436  
70045  
"Rccd1",540.712022886326,-0.524244784129567,0.279691178123972,-1.87437  
010936826,0.0608794303785248,0.135095543015473,-1.0494190672748  
"Tcfl5",2.40834073075253,-3.29059518255977,1.42327387604673,-2.3119901  
502722,0.0207782261164767,0.0591609014046527,-9.30413946626304  
"Sccpdh",1312.70184001024,-0.48664197024342,0.344682706145524,-1.41185  
490762034,0.157992687271579,0.278857736618199,-0.62146784682176  
"Prc1",219.796149363231,-0.791379459138505,0.419951784587513,-1.884453  
14005706,0.0595037076311749,0.132761562122972,-1.59795381990583  
"Cnst",1605.83769846146,-0.646866524856439,0.362255359189437,-1.785664  
4724424,0.0741536010576464,0.15695255247742,-1.19787502030358  
"Supt3",570.627574007611,0.0270005809143579,0.278162620330297,0.097067  
6106023762,0.922672702361137,0.952320744184557,0.00131906976853138  
"Edc3",932.015909897666,-0.303413012958368,0.173511662244978,-1.748660  
63198671,0.0803496988859234,0.166825516864842,-0.543354093474719  
"Slco4a1",1344.00540592376,0.329187827969401,0.585561774391465,0.56217  
438085248,0.573997214601196,0.699881038727666,0.117468998558866  
"Ube2l3",5235.54837473174,-0.105213292864972,0.141786195160111,-0.7420  
55971994739,0.458053423984845,0.597839591730136,-0.0541251690844322  
"Pdk2",7225.01570296628,0.781601060024968,0.349480121938626,2.23646785  
885645,0.0253211404129523,0.0691569681708565,2.08795067053856  
"Klk1b16",13.9093555761531,2.90855481681353,0.879571110149383,3.306787  
57322936,0.000943724281657216,0.00562128859737518,15.0697877939225  
"Lmtk2",2778.77618547158,0.494463440898071,0.209438212327132,2.3609036

546098,0.0182304661816662,0.0535005462989354,1.44782031082317  
"Clndnd2",1.37449259637713,0.514716225059449,1.69704975952796,0.3033006  
08700253,0.761660782348499,0.845664505366508,0.0862832004307886  
"Rabggtb",2756.53707170819,0.16640151513661,0.143415033958928,1.160279  
4389343,0.245935052998053,0.385057067670765,0.15880757032442  
"Ppp1r9b",5382.07996895297,-0.903855794378656,0.144266505292529,-6.265  
1811835735,3.72392162005803e-10,7.18901225226649e-08,-14.8667348591506  
"Rbbp8nl",32.4925776288708,-1.78487098259113,0.584640502871953,-3.0529  
3761520666,0.0022661304388789,0.0110077257840709,-8.04826510716963  
"Bloc1s5",840.528883801696,-0.218226164126615,0.256225350103826,-0.851  
696227708098,0.394382714880595,0.538718941764175,-0.134986257140768  
"Tspyl5",149.507117488595,0.257724315069049,0.276214254621012,0.933059  
430342098,0.350789284352155,0.495702379400227,0.180865660009213  
"Cfap157",20.9052455286945,-2.40407850835515,0.843905511076344,-2.8487  
5318006741,0.00438909159624141,0.0179722454385033,-9.66181514060697  
"Cables2",1264.27549747547,-0.212979846025953,0.204054445395916,-1.043  
7402900619,0.296605563740165,0.440961897202114,-0.174387218130652  
"Txndc5",5830.32285900614,-0.131673546916633,0.112739445193752,-1.1679  
4567057112,0.242828680395807,0.381674615909508,-0.126826225481607  
"Hils1",3.3593633056538,-0.379184332893027,1.19085098423625,-0.3184145  
9419561,0.750170469356902,0.837493490496471,-0.0672452275217218  
"Asb17",0.0824412674207658,-0.0705096924244733,4.78471990596623,-0.014  
7364305142611,0.988242455162279,NA,NA  
"Ube3c",1575.68131201899,-0.215713055677409,0.133530685374098,-1.61545  
681483675,0.106211805141463,0.206164039487132,-0.34062884474389  
"Rps21",11462.8665424166,-0.320145791503555,0.223499823481502,-1.43242  
078009986,0.152023435019091,0.270919451119238,-0.418089187842396  
"Bmp6",1996.24433441765,0.230463248143283,0.23037026893839,1.000403607  
65876,0.317115224804515,0.462288796503808,0.177817487260679  
"Tlr4",326.509114542084,-1.33026841410234,0.21809966469642,-6.09936019  
825608,1.06493852413563e-09,1.63497412154303e-07,-20.787397701696  
"Cpq",3401.80896745327,0.254421050986312,0.163524288105262,1.555860930  
10562,0.11974116564032,0.226188068945453,0.378168514749864  
"Siglec f",21.9106313458096,-2.05360942060328,0.644970027934696,-3.1840  
385314947,0.00145235678377544,0.00784707079166669,-9.95510775831454  
"Timm8b",2907.99741972567,0.755205086457998,0.284413829217295,2.655303  
67681599,0.0079237041060409,0.0282753262554146,2.69288440764832  
"Mtg1",865.111778681532,0.426873260725309,0.323273701639638,1.32047011  
111704,0.186678108764171,0.315384261735015,0.492596164171466  
"Ttc16",74.5850919904617,0.24720211590379,0.335740876604395,0.73628840  
9096725,0.461555198595378,0.600841451609873,0.125930736891224  
"Arhgap18",2594.95030725194,0.0716182735218178,0.203769676069853,0.351  
466787910419,0.725238184547264,0.819133066228497,0.0142884711030227  
"Tsga13",1.09384289378068,0.104615038766228,2.05562113860912,0.0508921  
789143561,0.959411437757651,NA,NA  
"Tasp1",428.947205782717,-0.0199369652664871,0.179256337340754,-0.1112  
20420779815,0.911441558654133,0.94543211739311,-0.00111872669849926  
"St6galnac5",205.323286186315,-0.40600620057593,0.451698405917606,-0.8  
9884355414349,0.368735997305099,0.513773208151926,-0.270389305528769  
"Adrm1",4165.30101098365,0.246704514577087,0.202160618203174,1.2203391

3810625,0.222336338875385,0.358214669921687,0.253272488320047  
"Arpin",1087.78478621231,-0.327400656659867,0.196541859235011,-1.66580  
624572389,0.095752011752489,0.190877489535838,-0.542215912495868  
"Usp6nl",1339.91317576234,0.162285254994935,0.149848795850042,1.082993  
38726311,0.278811358210544,0.422562290119642,0.139795506456628  
"Pigk",2453.00481214545,0.226600242277793,0.189334247500785,1.19682648  
685549,0.231374192167127,0.368332299059002,0.226321469977996  
"Foxred1",1995.90729131818,0.0733997217249888,0.258320771680868,0.2841  
41771671647,0.776301736441906,0.855256597194275,0.0114763211089044  
"Osbpl2",1949.49165343614,-0.289229150051335,0.239372085310015,-1.2082  
8270212356,0.226938539749213,0.363138912435794,-0.292980405571352  
"Eme1",38.7710318139297,-0.587105347623116,0.437697046490337,-1.341350  
9465755,0.179806535972895,0.307208888748642,-0.692917784720323  
"Myo16",4.73223997900175,-1.97291026078308,0.887518412752768,-2.222951  
35789218,0.0262190801183639,0.0710915900636712,-5.21595298518018  
"Ak5",298.705331470068,-1.19381771906306,0.439109324184444,-2.71872550  
481668,0.0065533967640483,0.0244785689857115,-4.42901273724925  
"Hrh3",23.8506989363718,-1.50612458579073,0.921771533953411,-1.6339456  
4738952,0.102270263763506,0.200720909374821,-2.41859487346052  
"Anpep",4604.94004542042,1.23297558434272,0.295096394428421,4.17821297  
590198,2.93808470968492e-05,0.000384217140640084,9.69649321054168  
"Echdc3",1079.56626489552,0.212139022392486,0.45296512009605,0.4683341  
2327091,0.639545669784118,0.753465949815754,0.0600505009457134  
"Atpscmt",1042.04517126262,0.16540916820645,0.188585236085855,0.87710  
5608262709,0.380429278804438,0.525289290994189,0.106491437721003  
"Psmc7",4122.82565356574,-0.104126153694893,0.187345260354604,-0.55579  
8174439024,0.578348833636338,0.703339709239776,-0.036643584111296  
"Zzz3",2330.85748016343,-0.145268569248152,0.0942982800382655,-1.54052  
19394161,0.123433179165705,0.231346739149565,-0.212649602277583  
"Mtg2",1229.81579646516,0.29874053093289,0.178744062220057,1.671331216  
39085,0.0946562738173463,0.189351392930196,0.497149284069323  
"Trhr2",1.04379095204363,-0.135397534964967,2.27043651741585,-0.059635  
0234531434,0.952446323314952,NA,NA  
"Zfp503",4284.88447779288,0.93925610444163,0.20985202726479,4.47580190  
996432,7.61250416848309e-06,0.000137306758813213,8.35307975743004  
"Chad",3.90844691626114,-1.27123358058683,0.923054738133646,-1.3772028  
1156584,0.168449552832983,0.292381119476521,-1.56323227806252  
"Ss18l1",727.256127045147,0.279067302272631,0.160859598300512,1.734850  
17506563,0.0827673462878098,0.170609759796989,0.493496041649092  
"Rreb1",1908.79115757797,-0.682105287523389,0.25647805029043,-2.659507  
45785453,0.00782549974907033,0.02800176070974,-2.43885919408065  
"L3mbtl3",1116.12633396396,-0.073039442300337,0.151991744429365,-0.480  
548746739865,0.630837249803973,0.746453738116146,-0.0213583131834314  
"Sptlc3",194.926127779458,-2.11538556606139,0.715770805496104,-2.95539  
51485842,0.0031226881892603,0.0139295754550897,-9.04060995822331  
"En2",6.83574649145093,1.82439887497813,0.595729535187324,3.0624616830  
5968,0.00219524578491894,0.0107384496840819,8.27168684831755  
"Rsad1",556.14183831497,-0.52426744603,0.304597117810012,-1.7211832134  
1768,0.0852175829531529,0.174589937209265,-0.915011979451565  
"Rln1",14.0388032903992,-1.29914283997944,1.07475344225887,-1.20878220

892129,0.226746528394159,0.362921015484265,-1.3167722818373  
"Wdr93",94.9434759899272,-0.117353868042768,0.594845002009718,-0.19728  
4784517448,0.843604685554159,0.899863458555446,-0.0123822694761894  
"March6",5653.46787170365,0.466477617534556,0.196619791195277,2.372485  
5707494,0.0176688532512827,0.0522450871710519,1.37695302472111  
"Nexn",1637.62027454389,-0.200995917074868,0.331880816143192,-0.605626  
801243453,0.544762601013449,0.674788617274026,-0.0790629091041496  
"Atp6v1g1",8965.32831364051,0.394273686314625,0.189094577674769,2.0850  
60773095,0.0370637843844186,0.0924839605742762,0.938655269682563  
"Lsm14b",2616.70688006208,0.282145175208249,0.0731988535169557,3.85450  
265478397,0.000115965125312845,0.00111713834651672,1.91773649863952  
"F13a1",192.099507321695,-2.06385448567643,0.561987424928274,-3.672421  
11500954,0.000240263329603982,0.00194823172382901,-12.8801714416568  
"Mycbpap",428.414364623572,0.420284566815965,0.421124765082029,0.99800  
4870917766,0.31827699669551,0.463296610448278,0.323361819367849  
"Nrn1",51.3452310925622,-1.89472895591396,0.399676622716916,-4.7406549  
4007129,2.13028471144925e-06,5.02252615524032e-05,-18.7559076098029  
"Itga9",1265.62006665871,-1.19335854159214,0.276502783089153,-4.315900  
65119657,1.58953462347787e-05,0.000241331082213307,-9.93988996819324  
"Adgrg6",668.411253504866,-1.13927547967979,0.192295414088431,-5.92461  
076141873,3.13037961854414e-09,3.40984032415495e-07,-16.965441268866  
"Taf4",2221.36694778393,0.0723706747201488,0.162512721094849,0.4453231  
36752541,0.656086249975399,0.7656892142228,0.0193214443686175  
"Prune2",458.983987800032,-2.05996542377135,0.508690526137273,-4.04954  
548576645,5.1317203220912e-05,0.000589271394818223,-15.3191877085901  
"Cdc123",2771.36868135604,0.189382133961115,0.182901122494895,1.035434  
50897301,0.300466036636197,0.445086144806859,0.153302457232925  
"Zc3hc1",554.244054146642,-0.0598490634238015,0.179784046704807,-0.332  
894183442592,0.739214160220256,0.829918678872261,-0.0111575148775811  
"Gipc2",4243.26401943855,1.8587254670256,0.494196761847129,3.761104099  
66742,0.000169165004412435,0.00149112986258302,12.0969963953335  
"Whrn",1050.87271788734,0.860987005188959,0.309681094258943,2.78023754  
485005,0.00543191480498206,0.0211611338396684,3.31961210325484  
"Camk1d",692.074907226258,-1.09944216877855,0.358645753933839,-3.06553  
794857243,0.00217278802599349,0.0106525071488109,-4.99362235455253  
"Ifi44l",4.79869574416432,1.81494014420854,1.02085601076442,1.77786105  
49097,0.0754266778923138,0.158942235432515,3.33806412448066  
"Sart1",5626.56806665862,0.393439941314583,0.264817610748861,1.4857015  
747631,0.137358073925126,0.250627711528364,0.544436943055362  
"Runx2",404.620681765236,-0.943506234131682,0.416089531645791,-2.26755  
580800065,0.0233562937675584,0.0648996744876519,-2.58040715478408  
"Shd",314.557180158402,1.70901809960717,0.451364055639662,3.7863407115  
6861,0.000152882020004736,0.00138023382824381,11.2547427169835  
"Cdh26",9.6495645110623,1.06266066442419,0.753070043396108,1.411104682  
41697,0.158213749557241,0.279083517289278,1.35621450617378  
"Stim2",1350.55897225575,-0.316263659204955,0.156660960150485,-2.01877  
77408051,0.0435103256089265,0.104632995649093,-0.713900797589266  
"Fam102a",3499.37612619052,0.376758143931509,0.137996741156809,2.73019  
595081154,0.00632966903412633,0.0238254607774894,1.40794536831226  
"Akna",1052.1551327752,-1.26888493801494,0.335307549816278,-3.78424207

480621,0.000154177704184472,0.00138788406102901,-8.34923110644916  
"Ube2h",5435.33520381847,-0.547865366585752,0.253659074164109,-2.15984  
927166966,0.0307843399070777,0.0802343349162147,-1.38215679559957  
"Cmc1",981.044280184373,0.694761298988788,0.226817726151249,3.06308202  
087124,0.00219070005978579,0.010724145057922,3.150921414337  
"Naif1",338.394414137237,-0.182066665442284,0.115331472560469,-1.57863  
817568812,0.114419072984875,0.218355983660476,-0.277037844413284  
"Akap7",1018.36615361136,-0.605874471224086,0.324293187257086,-1.86829  
232013367,0.0617213365195471,0.136413808598745,-1.20693969425479  
"Adgrl4",2815.36501199348,-0.515591388582954,0.19471098934134,-2.64798  
299431929,0.00809735983419211,0.0287634035429182,-1.82965410817802  
"Dap",4096.74925157518,-0.538563490534199,0.19579035873533,-2.75071507  
102262,0.00594653416365897,0.0226766131670297,-2.03922818715524  
"Polg",3388.41123394834,-0.134039905926845,0.119859865881297,-1.118305  
15528519,0.26343668589347,0.405373569690702,-0.121030829431425  
"Tbc1d19",1689.30398999107,0.64026202545389,0.212354722478082,3.015059  
0388682,0.00256929238160822,0.0120800730302862,2.82752390249791  
"Tekt5",13.402235473128,-1.22467238925122,0.558752827181955,-2.1917963  
1793148,0.0283942171129481,0.0754676179482363,-3.16461666661256  
"AW209491",635.010235249703,0.283662301240388,0.219924609695513,1.2898  
1609485687,0.197114518366034,0.328212232840955,0.316026702852632  
"Nubp2",1279.41788315254,0.124495706496103,0.14732858605511,0.84502071  
0709419,0.398099275719729,0.542541390786557,0.0761279916235378  
"Fanci",53.0704826352886,-0.804388811798248,0.431913683181146,-1.86238  
325647323,0.0625490875217756,0.13769697510439,-1.59486156907534  
"Rbpj",2431.52608411164,-0.918658595393825,0.195197365528893,-4.706306  
32183324,2.52245404899482e-06,5.73895088066522e-05,-8.97129743455644  
"Nlrc4",247.916776035819,0.211237140209218,0.246404491138549,0.8572779  
62886003,0.391291284497763,0.535734672083238,0.131836532915337  
"Rlbp1",1.89249862636685,2.18659912858521,1.69643492282751,1.288937818  
45797,0.197419705013911,0.328521755428969,2.43401766697114  
"1110008P14Rik",1808.009879358,-0.237130029548193,0.356161654198663,-0  
.665793261999857,0.505543252269622,0.640402958209011,-0.10567881848430  
1  
"Orm1",1339.21506323218,-3.52630721575421,1.57123494572404,-2.24429021  
60181,0.0248137346553024,0.0680475665694918,-9.47712099814617  
"Adk",3390.04580085745,0.299105344000746,0.408220743513888,0.732704912  
117161,0.463738427352453,0.602637420455754,0.151478777577216  
"Ptchd3",0.220934797106265,0,4.78471990595636,0,1,NA,NA  
"Zdhc1",2932.6025616815,0.23996608341011,0.172579946870077,1.39046330  
562822,0.164388234523105,0.287012776889152,0.299532515248955  
"Atf7ip2",23.0502070574881,0.467659840632341,0.493848230781777,0.94697  
0772563102,0.343653672449222,0.488307776229043,0.335222961787508  
"Tbc1d25",511.335293736405,0.205702801203745,0.193105684213198,1.06523  
431478402,0.286769908793507,0.430806663198691,0.173221478679665  
"Abhd2",5517.82125229844,-0.175050654052064,0.231168305361132,-0.75724  
33157677,0.448904103817763,0.589647818393879,-0.0924669786816599  
"Ciz1",3815.31849543182,-0.0417672193465213,0.149450891944463,-0.27947  
1194872777,0.779883240854743,0.857554896807229,-0.00641837203822048  
"Daglb",934.459853083471,-0.499093797541565,0.133420715923021,-3.74075

190714405,0.000183470555905717,0.00158288004382729,-3.21841098438892  
"Metrnl",1356.89653110778,-0.03222325955,0.280244100535556,-0.11498282  
9213605,0.908458732068774,0.943794136715524,-0.00186402573076609  
"Rpl39l",1.43025349238833,0.156953918868488,1.56513813716097,0.1002811  
92529875,0.920121088405398,0.950948988554825,0.00789397501032553  
"Gpatch2",1061.37282127606,0.20559102241088,0.145338510814833,1.414566  
73292057,0.157195568435988,0.277853249330513,0.263292647930909  
"Il18",172.66291590087,-0.847425810609789,0.193745116635695,-4.3739208  
7772324,1.2203462493467e-05,0.000198407203388849,-7.22446524669531  
"Srrm2",25811.654957819,0.240572913716009,0.196750761939911,1.22272926  
083753,0.221431971325159,0.357259460231522,0.247620011703568  
"Arid4b",3874.02086790603,0.543886710827298,0.220459619420919,2.467058  
19530998,0.0136228215449137,0.0430258234255412,1.71104300791078  
"Ppp1r10",2861.74620462419,0.138147836385296,0.181081019593124,0.76290  
6221180468,0.445519325750646,0.586624514687068,0.0736839573806473  
"Rpl22l1",3604.22952783309,0.0822937678353574,0.184587495747529,0.4458  
25257567368,0.65572347555341,0.765529958651212,0.0219878190703359  
"Tbcd",1725.93677456134,0.48654468560068,0.162576397909614,2.992714144  
59054,0.00276508604291156,0.0127304953163376,2.1231617839789  
"Suv39h1",723.687103371347,-0.279580354674163,0.160133869177432,-1.745  
91643922861,0.0808254728669581,0.167576663667769,-0.499418396425804  
"Stx11",472.920375705775,-1.46602216683626,0.316585536844478,-4.630730  
07519116,3.64378639138572e-06,7.79019156351303e-05,-13.868657680768  
"Tbce",2100.6375370361,-0.0288063687768562,0.162829863013894,-0.176910  
845735946,0.859578419332232,0.911029575198301,-0.00268417507205197  
"Sec24d",1332.46471762608,-0.438774328819772,0.241454669192379,-1.8172  
1202695061,0.0691846541134178,0.148809970866345,-0.835902458175177  
"Isg20",389.111946354669,-1.25481076119377,0.210935935524372,-5.948776  
61823909,2.70154027352368e-09,3.09850777959792e-07,-18.8060684909485  
"Zfp750",288.050481444891,-0.498229450957695,0.369009183752422,-1.3501  
8171063182,0.17695770331219,0.303431650618334,-0.594187894032882  
"Tgfb2",626.402820741042,-1.23075230337232,0.367132218747761,-3.352340  
76586973,0.000801313220913099,0.00496788718008382,-6.52884638135781  
"B3galnt2",1600.51102134618,0.116360165851832,0.103784270862851,1.1211  
7341948279,0.262214051663252,0.403810882183879,0.105516401887596  
"E130309D02Rik",747.696903868413,-0.1079074054709,0.123596317155652,-0  
.873063275299746,0.382628589715688,0.527429638902544,-0.06903266291118  
42  
"Lyp1al1",1057.32184222832,0.642822121363418,0.405080363634406,1.58690  
022788559,0.112535243317408,0.21560500876514,0.986286614570515  
"Lgi2",477.260291451438,-2.73784055659848,0.486988045314853,-5.6219871  
9853252,1.88773256646445e-08,1.29602146411704e-06,-37.1147453602324  
"Fn3krp",859.052468674556,0.119278196041471,0.213636131941522,0.558324  
076351093,0.576623107160666,0.702029181605911,0.0421982767639938  
"Pomt1",1252.52808181473,-0.0255767228947026,0.241692931833209,-0.1058  
23214194584,0.915722617942123,0.948401052768082,-0.00135499888730032  
"Vstm2b",143.309738177999,-1.50736622658749,0.510837542098738,-2.95077  
417449507,0.00316978577828095,0.0140720589947454,-6.42675249788663  
"Prrc2b",5530.32741637128,-0.348910084868477,0.104147037824019,-3.3501  
6810999505,0.000807625287351965,0.00499208105956173,-1.84918939972143

"Npepl1",4869.27005032559,0.159126938206725,0.106604953076853,1.492678  
65717279,0.135521322735924,0.247832934787567,0.221982144019968  
"Gimap3",1949.67883235632,-1.26274878394755,0.387457427683053,-3.25906  
459323448,0.00111780214661534,0.00640838172734666,-6.37706887783093  
"2300002M23Rik",2.75580949625136,1.84320026853651,1.27377062241262,1.4  
470425334864,0.147885011345664,0.265072803016892,2.44731056173374  
"Megf9",1112.72141397243,-1.06054577223038,0.310431340276491,-3.416361  
79931379,0.00063463867649305,0.00414267991773066,-5.81859145161154  
"Foxk2",1909.13610237603,-0.114260708025229,0.109704719328267,-1.04152  
955975695,0.297629841548925,0.44188975683729,-0.0933161314513112  
"Pcsk1n",9.49638608521057,0.0482745239676476,0.99277332633011,0.048625  
9276788786,0.961217407101879,0.976507253256082,0.0011476351283801  
"Azi2",3083.78742049752,0.118434613809383,0.0985735511292238,1.2014847  
0307337,0.229563236748037,0.36625677032266,0.118958169806954  
"Fndc3b",2382.27181398999,-0.633406387172674,0.135507857005383,-4.6743  
1484174022,2.94936584383444e-06,6.52743873133756e-05,-6.10408087212028  
"Cybc1",1921.13422220201,-0.46193631850843,0.134779449184565,-3.427349  
80223775,0.000609503375475757,0.00401083253966463,-2.54931403417949  
"Cdk5rap2",881.197026021419,-0.148607647822579,0.183793555109022,-0.80  
8557447699559,0.418769749352896,0.56172073286205,-0.0857095306095686  
"Tnfsf10",2468.08678946064,0.0806253248304128,0.277437961816825,0.2906  
06679426389,0.771352151016291,0.852226186911947,0.0128922562932431  
"Hexdc",3679.19537108488,0.358519319003704,0.107741477532332,3.3275886  
61443,0.000876011086377725,0.00532101687295729,1.8772397266298  
"Ndst2",1121.14360683639,0.131541178116048,0.161801527027016,0.8129785  
95029483,0.416230330605179,0.559584843559249,0.0763675622804291  
"Minar1",5.51488414937437,0.419215058014916,0.861180294133267,0.486791  
280375074,0.626406250240351,0.743104713262739,0.124472627028419  
"Clnk",36.3943247696123,0.161641797757236,0.494007354113993,0.32720524  
5855382,0.743512653467204,0.832969990651777,0.0295412772161589  
"Rftn1",933.420664806238,-1.07228367864881,0.274945545619445,-3.899985  
63618473,9.61983950960434e-05,0.000961015533740277,-7.44971228698349  
"Rab3gap2",1714.98212126908,-0.0879120438103634,0.143665927327685,-0.6  
11919927331457,0.540590736569257,0.671229641760802,-0.0350456054931322  
"Uts2r",1.38556916417534,-4.36164795655824,2.5868049399974,-1.68611397  
369708,0.0917738490274482,0.18489424554011,-7.36233641036224  
"Igfbp2",3222.42141363699,-2.18440007970756,0.529384730428775,-4.12629  
97478947,3.68646714423771e-05,0.000457826346358897,-16.7958972162525  
"Rnf122",598.671128154172,-0.381574948679614,0.238643341880033,-1.5989  
3398103448,0.109835272575926,0.211589568760367,-0.592626676956516  
"Tex19.1",1.54470862602035,-4.19578448906006,1.86160028152576,-2.25385  
896784524,0.0242050417254517,0.0666829731904271,-11.3613688749811  
"Tsga10ip",0.965395286604098,1.54711175168868,2.18871696011805,0.70685  
784406095,0.479654823617972,NA,NA  
"Tex19.2",4.93085409677884,0.341685595218435,0.960857778969666,0.35560  
4755143708,0.722136582048516,0.816623308014265,0.0692177650600217  
"Mfsd4b2",32.0387923605016,1.15292462260689,0.616324069885144,1.870646  
75702467,0.0613940591908244,0.135927245556886,2.30081730054291  
"Mettl22",272.315524398211,0.0932792406154254,0.25469026841022,0.36624  
5798073384,0.714181670719636,0.810447806756575,0.0196043428051377

"Atp6v0e2",1392.82390996549,0.727239269539819,0.224895400545168,3.2336  
7782434377,0.00122207230163825,0.00685499589681891,3.62367151631232  
"C130074G19Rik",13709.0864736048,0.615326791839936,0.225840326480596,2  
.7246099110329,0.00643774987919215,0.0241390859893247,2.29142954769362  
"Smarcal1",1006.17657481157,-0.231722958243783,0.167913588555596,-1.38  
001313793053,0.167582599742905,0.291171407038599,-0.285909786486827  
"Exosc2",1193.20645918972,0.0796874376841301,0.092238569339887,0.86392  
7511608429,0.3876277125082,0.531935902837913,0.0503012829995482  
"Fut11",1006.04588888534,-0.533204477195567,0.153872127259847,-3.46524  
407435489,0.000529750462884111,0.00362362034235533,-2.99675934332305  
"Drd5",0.125230909864205,-0.959896647578536,4.78290477385422,-0.200693  
238306942,0.84093844719866,NA,NA  
"Picalm",15888.3805403256,-0.0422288205754932,0.1023827084588,-0.41246  
0475124924,0.680001945139027,0.784674945167225,-0.0102398863650785  
"Sectm1b",723.544506816475,2.03023008833745,0.831312887663435,2.442197  
29835273,0.0145981661102192,0.0453503595909327,6.28018620243312  
"Sec24c",6522.1870330604,-0.0277035504556442,0.11891377781383,-0.23297  
1746125304,0.815783345474038,0.882553069530513,-0.00346118065707844  
"March4",7.20318526117592,-1.52012090118351,0.756362543169247,-2.00977  
813472099,0.0444546759737575,0.106322536162412,-3.40701354960042  
"Wdr17",27.9958428185966,0.93422758871667,0.733668556535914,1.27336462  
820175,0.202888683016311,0.334978554733704,1.02175421766375  
"Synpo2l",54.8898548956826,1.11473489319854,0.366515422911721,3.041440  
61481156,0.00235449004955244,0.0113185027086227,4.99547985275113  
"Hlx",407.462317626234,-0.999504316197991,0.210348400119682,-4.7516611  
280585,2.01752292960885e-06,4.80900514443928e-05,-9.93750692882539  
"Wdr45",1979.24507717217,0.34087601716903,0.119537428560252,2.85162581  
523337,0.0043496269170492,0.0178692544059205,1.37191473236714  
"Dusp10",430.939694491421,-2.57819343169206,0.537593175978114,-4.79580  
758628718,1.62020746805863e-06,3.99807842880742e-05,-26.1096526402617  
"Cdh6",1549.16245575907,-0.639980158681382,0.519668705717283,-1.231515  
67843216,0.218130056432496,0.353511748011039,-0.665476047134855  
"Ccdc81",5.21427465979759,-2.23635730337818,0.920805098248548,-2.42869  
778591792,0.0151531574859693,0.0465138955701243,-6.8611535582364  
"Mreg",279.762850493236,-1.69558667993378,0.46832712113843,-3.62051780  
347907,0.0002940140179316,0.00227487512763108,-10.3190524827913  
"Neil3",179.529302908004,-0.0106362360145718,0.289538013514939,-0.0367  
351971696213,0.970696144290529,0.982079359764256,-0.000192336752002431  
"Prss23",2866.49035954768,-0.970559870440908,0.353513504069364,-2.7454  
6759676391,0.00604247342733426,0.0229750676455077,-3.66225788114426  
"Prdm16",1144.25895035278,0.143658823328682,0.212465552153568,0.676151  
130724696,0.498944696253743,0.634434830282736,0.0653677394228914  
"Heatr5b",856.231110732883,-0.229013837233218,0.208748534139229,-1.097  
07997796273,0.272606431860572,0.415288710713136,-0.201253080387771  
"Cntnap2",290.974489794919,-2.76043708884558,0.657013984501045,-4.2014  
8909150226,2.651650265105e-05,0.00035460820897817,-21.9302842113952  
"Alg1",1706.43924070919,0.253979108350331,0.129667907942901,1.95868902  
629455,0.0501492163655841,0.116662667397584,0.545666163018457  
"Tmem135",3902.27910288459,-0.232351184353447,0.419059510263656,-0.554  
458683463026,0.579264974158551,0.703965219429095,-0.0815613831115121



"Mtmr7",114.037980762591,-0.00749174345071215,0.321291307243084,-0.023  
3176039370528,0.981396929620242,0.98808619920146,-8.97910840937898e-05  
"Ttc36",17386.8206653601,2.36295125521601,0.816627689774275,2.89354780  
006193,0.00380916306886305,0.0161810591539634,9.74460754721187  
"Prpf18",1764.45814047187,-0.0253866099729357,0.0811979882374718,-0.31  
2650726009245,0.754546034909261,0.840597565344577,-0.00440818814528009  
"Dcxr",4000.41864430777,1.74415848370021,0.442444483775128,3.942095669  
98846,8.07727433712888e-05,0.000838162293908137,12.3561398671893  
"Snx22",218.762661847824,-1.33462310454018,0.413173903264447,-3.230172  
80132035,0.00123715419993758,0.00691968806379317,-6.63759397871548  
"Morc3",1952.41237160747,-0.199568753911311,0.184566868758267,-1.08128  
157157335,0.279571882309203,0.423320071543437,-0.171554632491312  
"Ppl",1367.15718816228,-0.858345567723946,0.313404290648529,-2.7387805  
251414,0.00616675253989621,0.023356515350213,-3.22470069889154  
"Mtmr12",1855.18723358574,0.434214589321396,0.157905006254792,2.749846  
88338986,0.00596231180739773,0.0227234471502426,1.64322344329799  
"Tcta",1735.75317599329,-0.0507885226357684,0.160155023106566,-0.31712  
1009698048,0.751151783583622,0.838157117792918,-0.00896669867220953  
"Col10a1",2.15485347948128,-0.789644350755396,1.29139333966919,-0.6114  
66953172978,0.540890489714919,0.671434258727309,-0.314546275220012  
"Slc9a8",5817.91732877974,1.22989967172387,0.227309545337358,5.4106820  
278864,6.27851671257704e-08,3.21308448456239e-06,15.5561144157475  
"Zdhc2",259.33682154797,-0.395038476210771,0.311029860737466,-1.27009  
823196434,0.204049641352308,0.336453269098292,-0.430313837097806  
"Ubn1",4516.56006486046,0.215638866553461,0.19814448622698,1.088291027  
72227,0.27646665019639,0.420053514028615,0.187039365417722  
"Wfs1",1133.22631547822,-0.382446282069322,0.17212574063069,-2.2219005  
7494011,0.0262900255543531,0.0712443249838466,-1.01028543953539  
"Prrx2",82.0058398829354,-2.62823053112422,0.466000777048776,-5.639970  
27594897,1.70079521709337e-08,1.23051593970637e-06,-35.765163476387  
"Tnrc18",4233.88659978859,-0.118680377781284,0.154878948949629,-0.7662  
78300480218,0.443510726990162,0.584809099537038,-0.0636684397883361  
"Micu3",980.789300644917,0.667075787587975,0.177325263682324,3.7618767  
5537893,0.000168643147888365,0.00148720221507342,4.34323614990394  
"Nt5dc1",1092.14007516546,0.0903429119729734,0.242863253264856,0.37199  
0866294002,0.709899649807346,0.807515510877057,0.0193146835845708  
"Nrtn",420.774439330748,0.962850735525334,0.311504392037132,3.09097001  
563484,0.00199503779030596,0.00996905352008856,4.43707580496326  
"Asb6",1246.04467633383,-0.209320675618792,0.123106125303012,-1.700327  
05605487,0.089069423976629,0.180621490244026,-0.358221283908955  
"Tspyl4",595.810198812155,0.869819262553578,0.356146146900543,2.442309  
90598498,0.0145936129715312,0.0453460184412614,2.69072752601054  
"Cntn5",6.96407802546274,0.679614035688085,0.913409004200151,0.7440413  
13982016,0.456851481343104,0.596870154330463,0.350718687524112  
"Ccdc27",0.557326422036592,-1.35444728537467,2.65175112808115,-0.51077  
4661706193,0.609508853633834,NA,NA  
"Cdnf",72.5879027299683,-1.29250005306424,0.562397569117167,-2.2981963  
7217346,0.0215506150930255,0.0609683536105355,-3.61564009137978  
"Dse",1031.41471511676,-1.42026540085676,0.2497276288157,-5.6872577839  
7921,1.29095513326197e-08,9.71854949356832e-07,-19.6622383923955

"Znfx1",3693.3216097424,-0.368959641596426,0.136477777977471,-2.703441  
15404143,0.00686255981306811,0.0253901691148391,-1.35533384685356  
"Calhm4",0.919083919813579,-1.66578713159742,2.20592254869093,-0.75514  
3072718466,0.450163141356479,NA,NA  
"Nup133",788.342487546072,-0.202819723878037,0.191447516252028,-1.0594  
011760959,0.289417114299024,0.433247976552964,-0.169647548155511  
"Uhrf1bp1",1066.09636794548,-0.113133002559506,0.186774096503229,-0.60  
5721053816208,0.544700000948416,0.674788617274026,-0.0445015223603275  
"Ptpa",7385.96371880846,-0.175593963649279,0.172982038494437,-1.015099  
40094113,0.310058447169297,0.45527401630614,-0.138167130087689  
"Cdsn",79.6094114715764,-3.39553138358355,1.02234450185981,-3.32131818  
326064,0.000895933347033855,0.00541671578309027,-17.7187845830252  
"Cyp7b1",4610.43279751965,2.38917817469879,0.6509191443105,3.670468437  
71906,0.000242106365096354,0.00195956409574459,14.8966053130822  
"Foxp3",90.7310634015193,-1.71402433777122,0.677019080634062,-2.531722  
34993134,0.011350382806413,0.0374213331010214,-5.63145152955995  
"Cep104",1448.41434970257,0.112649494227001,0.113431685073474,0.993104  
300214121,0.320659128589526,0.465887607245795,0.0860429070769752  
"Atp8b1",1115.91185150066,-1.09282880439362,0.245309658324972,-4.45489  
513888564,8.39342084838062e-06,0.00014837254732704,-9.63414294576606  
"Tusc3",1810.42498710344,-0.215072632069294,0.27314799056662,-0.787385  
005553749,0.431056521649842,0.573350164344678,-0.119636010215799  
"Zup1",1110.13293722116,-0.289905236557605,0.151187138238284,-1.917525  
78913617,0.0551711678887376,0.125288543151014,-0.602172561872119  
"Mmd2",39.4487363818743,0.56814653257648,0.398378335059765,1.426148167  
64884,0.153825577510511,0.273283928045552,0.737024677541194  
"Stau1",3449.99595391716,-0.250226185788938,0.125087733144951,-2.00040  
547140604,0.0454564980595403,0.107968181162738,-0.556983149712998  
"Sgcz",8.2085490698172,2.0424993264057,0.81936922551735,2.492770368713  
89,0.0126750789785445,0.040527827143926,6.54777581644328  
"Ncam1",2015.34199487523,-0.550772804491731,0.483680519886079,-1.13871  
198414494,0.254823302603175,0.395490309174299,-0.510912822990799  
"Cfap70",87.4519571036176,0.356328809720643,0.590696685182012,0.603234  
821964248,0.546352485504659,0.676281155559284,0.139376723589814  
"Ajap1",25.5583011025276,-0.764604831737188,0.585578713835789,-1.30572  
511204976,0.191646054978707,0.321488867487121,-0.867667723534029  
"Rsph4a",35.3962410592061,-2.27452735190592,0.560928628512985,-4.05493  
18331918,5.01489250821255e-05,0.000580298956232216,-16.9497030978044  
"Ppp1r3f",276.942564300411,-0.830620302738516,0.252647142059027,-3.287  
66949813529,0.00101020357205477,0.00591855446151559,-4.2608022661522  
"Ubal1",1974.31386330148,-0.0974109484277149,0.125245019943915,-0.777  
763047754996,0.436708716032099,0.578618275699502,-0.053294728124213  
"Nphp4",135.297075399425,0.416250201887022,0.392234621655879,1.0612275  
8906329,0.288586484202814,0.432576953989877,0.348815604637462  
"Ccser1",320.293396781079,0.689134623970112,0.247969883025824,2.779106  
13805606,0.00545087114271968,0.0212137895290915,2.65530727917534  
"Grin3a",25.8845310326161,0.486233485974598,0.470265576215329,1.033955  
08956402,0.301157159067903,0.445858943622321,0.392756385303046  
"Myo9a",2854.42836718478,0.197711679819732,0.244068756944406,0.8100655  
00783316,0.417902530966165,0.561094406930885,0.114250878195641

"Fam149b",1941.65608546374,0.0421492388573948,0.154149834789323,0.27343032131692,0.78452244746371,0.860788944394184,0.00631842097891156  
"Rcan2",1208.46488748611,-0.0617723070251337,0.322279076787622,-0.191673339891813,0.847998090442965,0.902821162359775,-0.00631503196395948  
"Rbms3",3172.1464387317,-0.330639151756486,0.307015266862437,-1.07694693861799,0.281503971548735,0.425452634466881,-0.28256476613905  
"Tmem246",1202.26387026337,0.0169777623605176,0.281898247354187,0.0602265623141181,0.951975190441652,0.970151658066082,0.000514474945805546  
"Stub1",7110.02514146101,0.453561530589852,0.163222469352184,2.7787934614027,0.00545612045608381,0.0212215114009021,1.74745461645457  
"Mocos",634.05631837802,0.0407818691421764,0.280681982746465,0.145295642930576,0.884477454660435,0.927951660474155,0.0030494902659526  
"Gm7488",97.3855325901787,-8.9131482479038,1.52814916043697,-5.8326428326899,5.45562680405344e-09,5.06767814185337e-07,-129.197981448703  
"Trmt9b",203.138257907339,-0.668471173266967,0.361125851088084,-1.85107538342338,0.0641587089541951,0.140305906795297,-1.3128307193811  
"Prex1",1774.35049756671,-1.34187933549407,0.310691026712447,-4.31901542086058,1.56726831952406e-05,0.000239910780079641,-11.1848909464383  
"Ap5z1",1763.69793737045,0.337564484096951,0.158631669878947,2.12797661623653,0.0333390224075934,0.0852213670557311,0.831253585010954  
"Hs3st6",248.399463007121,-0.0528489310030529,0.442262153501723,-0.119496842731416,0.904881741250212,0.941985577839354,-0.00315853299149116  
"Strip2",275.312212529252,-0.147496121221157,0.186989834433129,-0.788792191127932,0.43023347429476,0.572841593544606,-0.0821768815563593  
"Hnrnpu",20576.5215100149,-0.0711751839465842,0.118749799210372,-0.599370983528934,0.548925522116546,0.678725750817737,-0.0275830980170097  
"Ccdc151",136.028752542195,1.23828117523678,0.446281834470002,2.77466183831421,0.0055259132529521,0.0214033088212277,4.76021256843894  
"Lonrf1",516.726206731464,0.277463292946398,0.265786714018613,1.04393213923766,0.296516787313755,0.440897149320796,0.22722680248541  
"Zfp189",406.90900195941,-0.0180137256614667,0.232370895139277,-0.077521436799001,0.93820873848708,0.961736711162456,-0.000702797486906993  
"Coro7",2516.34925193024,0.0840278468768878,0.191914160252546,0.437840786559536,0.661501702223539,0.770094768101474,0.0219515772504468  
"Kcne1",523.021282058948,1.01669311006712,0.580433743413582,1.75160924326669,0.0798410220928682,0.166087725249839,1.82520728982946  
"Mrpl12",5912.50886321312,0.674131629735082,0.377789481401245,1.78441079734323,0.0743569378556257,0.157229321582148,1.24717714900158  
"Vasn",1331.32523766931,0.108693892733384,0.260896914032777,0.416616245294986,0.676959124897703,0.782369095919354,0.0266765964570226  
"Kyat1",4000.66263345757,1.10526672291228,0.287202937039289,3.84838238183156,0.000118900360190515,0.00113922320540279,7.49084424577335  
"Cpeb3",1660.66133451652,1.98198119345957,0.351556359059471,5.63773387220764,1.72302512434208e-08,1.2351302895008e-06,26.9635343275696  
"Baat",39.8468970903162,1.83137873737277,0.397663488566252,4.60534796386682,4.11776738223844e-06,8.55039706271406e-05,17.154428930642  
"Rxrb",2540.18609815787,0.067018153645882,0.069611470847591,0.962745835274953,0.335675088658896,0.480260704334544,0.0491528689883913  
"Spout1",1167.38851377961,0.255165693400698,0.147684092062301,1.7277804930612,0.0840275859548689,0.172643813315108,0.448204840363652

"Dusp26",82.6960791549102,-0.184895449311694,0.302165196856927,-0.6119  
01871012762,0.540602683648848,0.671229641760802,-0.0737074545557223  
"Icmt",3018.39867060192,-0.0786571880299052,0.179031246779576,-0.43934  
8937377107,0.660408719808254,0.769369460877227,-0.0206226547374912  
"Oxld1",496.768337742436,0.873959488622759,0.310642743925398,2.8133909  
6345557,0.00490220083590515,0.0195786792090288,3.43755717967538  
"Zmynd8",4883.04122906936,0.133920897830345,0.293733205474867,0.455926  
995430567,0.648442476438675,0.760409659325271,0.0366806614531017  
"Kcne2",0.886791142810966,-0.492320172635655,1.94115948871458,-0.25362  
1701615907,0.799787829237979,NA,NA  
"Capsl",51.2490239499724,-0.468951430976779,0.367090249693841,-1.27748  
266636854,0.201431896160133,0.333253555198618,-0.515308054504028  
"Tbc1d13",4524.67519874907,0.288763254450759,0.248184110980586,1.16350  
419577564,0.244624996780104,0.383755586709991,0.276562840040656  
"Mrps6",4200.32228618959,0.99867319743696,0.192749547978778,5.18119605  
420251,2.20467611897937e-07,8.2826156007437e-06,11.6858263621543  
"Lap3",12549.6079752239,1.09709844822004,0.296077308906997,3.705445892  
73019,0.00021101917509469,0.00176283285175504,6.9565182521273  
"Sdk1",260.698251239517,0.263401161012236,0.307999290781827,0.85520054  
3948064,0.392440135136209,0.536926355963036,0.16380768950018  
"Gm5422",0.23846483581651,1.37343152846892,4.78471990596563,0.28704533  
5037588,0.77407760780412,NA,NA  
"Zer1",1922.77731579373,0.0248082953750133,0.105640148766523,0.2348377  
55007733,0.814334662780055,0.881864627739313,0.00311881747480963  
"Tspan10",2.51374592465966,0.855425945890022,1.03764587153959,0.824391  
027182326,0.409717411566395,0.55338529306744,0.506156205894662  
"Msantd3",336.640165247208,-0.855476340401518,0.346651855619361,-2.467  
82564851137,0.0135936512336229,0.0429577004462202,-2.6926454512536  
"Ncoa7",2337.74690065505,1.03688352883864,0.185587118806091,5.58704470  
175015,2.30966288228664e-08,1.5214123945549e-06,13.8899584584642  
"Batf2",132.807971755009,-0.732740109969764,0.395246977514656,-1.85387  
909751338,0.0637564589652089,0.139692486448325,-1.4422610030591  
"Usp53",1159.20361864719,0.197450020359331,0.194874333317443,1.0132171  
6922922,0.310956441334352,0.456141189673276,0.154988964292411  
"Nploc4",2490.25765348594,-0.235128679420532,0.19078491516657,-1.23242  
804188815,0.217789231220804,0.353188694939162,-0.24471083576963  
"Lmbrd2",3385.35738553188,0.962910917648639,0.208106138865027,4.627018  
32295857,3.70967705922873e-06,7.87922476044029e-05,9.09825248451869  
"Ldb2",906.807743157741,-0.629748181981253,0.151538044900881,-4.155710  
08846763,3.24278808491009e-05,0.000413795039787807,-4.90582636364866  
"Slc7a12",161.121163835072,1.10495066457836,0.838479555471384,1.317802  
75066716,0.187569686893902,0.316479210371868,1.27124322648013  
"Plekkg5",1592.7552725806,0.279082945764187,0.172789053691593,1.615165  
65894456,0.106274825151321,0.206213886815172,0.440627698571813  
"Cplx3",5.14002463040511,0.417158100360119,1.14273856379731,0.36505121  
4316165,0.715073176805811,0.811034657748805,0.0873714660775326  
"Wdr34",874.900098175969,0.616096818332615,0.129287534238746,4.7653226  
7368418,1.88551659372402e-06,4.53874105486802e-05,6.16113809793793  
"Dock3",35.4587513880163,-2.7991785814559,0.744577896365747,-3.7594167  
0457661,0.000170309967401727,0.00149854117883885,-18.2037950353457

"Raly1",27.5349767415102,2.64449250474652,0.782826564573564,3.37813332  
406147,0.000729796883603838,0.00461999338847651,14.2203935174127  
"Got1l1",4.20506252207552,-2.99971760221536,1.45981662158558,-2.054859  
19112033,0.039892607086159,0.0977045663818526,-6.97676414390404  
"Trp53rka",698.838826674512,-0.0700703570206549,0.0964738366319559,-0.  
726314609918239,0.467645924937976,0.605978616630601,-0.035098983149642  
4  
"Slc6a5",1.45505254243712,2.93006800066849,1.7098191506245,1.713671296  
5218,0.0865891113307197,0.176583463312036,5.08062549941962  
"Fnbp1l",4929.16074334861,0.0966415004729954,0.17088636842297,0.565530  
775595821,0.571712797561206,0.697924876461833,0.0347565173238081  
"Prkrip1",1036.36084848138,0.417799862783142,0.221554718438367,1.88576  
37775806,0.0593267941446513,0.132438705971906,0.844638966406615  
"Slx4",1396.36401077413,0.502271769520597,0.217854986032919,2.30553258  
691404,0.0211367638754238,0.0600414659153575,1.41274977967552  
"Alg2",1406.44734365127,-0.0501974665044152,0.130802894563198,-0.38376  
4187115615,0.701153233878325,0.801118415128016,-0.0111311129440833  
"Bahcc1",834.119068552742,-0.398065590192628,0.147696243121909,-2.6951  
6395121887,0.00703540042024071,0.0258627898555531,-1.45490984018439  
"Fam71f1",0.180089686221259,-0.0810280888821526,4.78471990596212,-0.01  
69347611719519,0.98648866133387,NA,NA  
"Htatip2",1400.14577597556,0.114787284467205,0.378554225156973,0.30322  
5474288675,0.761718036667169,0.845664505366508,0.0192420867856767  
"Orai2",512.989953728837,-0.935764773419534,0.258790358046586,-3.61591  
823004119,0.000299284845293482,0.00230650431364913,-5.68198446391463  
"Exo1",69.9932865182457,-0.997050106940906,0.659880665346284,-1.510955  
17614187,0.130799871516059,0.24114371168874,-1.4181663927466  
"Fbxl5",2996.9063325908,0.00722657219048336,0.085262999136229,0.084756  
2514067457,0.93245517465235,0.957752251771138,0.000311943257960129  
"Alkbh4",438.422662907451,-0.142782831665773,0.155218247728087,-0.9198  
84316152709,0.35763321565486,0.502785524467407,-0.0981762746099481  
"Dnttip2",1385.47645042859,0.553867367981462,0.163305695189631,3.39159  
860492502,0.000694861550996539,0.0044391908654425,3.0004563635886  
"Thap3",1271.52889157474,0.0750816019896028,0.178939652015748,0.419591  
751430226,0.674783715185477,0.780502632656251,0.0186065098233694  
"Il22ra2",0.722086683268075,-2.3747471470379,2.24996484385224,-1.05545  
966797064,0.29121514605567,NA,NA  
"Dnajc28",503.95585767089,0.199772755882897,0.337815693495396,0.591366  
119838418,0.554275135994327,0.683830460745215,0.0759226882493546  
"Cc2d2a",1096.02571368455,0.0997621254504013,0.150074093609364,0.66475  
2476933676,0.506208823194158,0.640871348265677,0.0443868179919514  
"Dnajc11",3252.98939813444,0.514254785232591,0.134930273555446,3.81126  
319306893,0.000138258464499373,0.00128003966800037,3.42538129424267  
"Ypel5",3165.22318924549,-0.212407872524788,0.243599757924682,-0.87195  
4366188088,0.383233273011369,0.528001862434686,-0.13565544922239  
"Polr2j",1349.36572448443,0.430795989440347,0.187344641028458,2.299483  
91945146,0.0214774754678496,0.0608143794179686,1.20619819011583  
"Galnt12",248.797985198075,-0.649436598703829,0.182050958379811,-3.567  
33413810938,0.000360631502757619,0.002668536258356,-3.84870752063649  
"Cep131",746.916762302578,0.151182247664116,0.272437322056146,0.554924

877851204,0.578946044732142,0.703802604912233,0.0531038761185484  
"Cpeb2",1990.92460803809,0.184219950335137,0.224744567159288,0.8196858  
89023384,0.41239519632965,0.555885346563119,0.108172705312186  
"Kmo",3353.5948306538,1.79607653377012,0.52196875716516,3.440965592509  
22,0.000579642236888194,0.00385992634386817,9.98098979730931  
"Cercam",263.787717886999,-1.14106837999741,0.320155883082809,-3.56410  
248973083,0.00036510328847262,0.00269650906009058,-6.75032922238895  
"Zfp597",522.690225019738,-0.414804007095504,0.210429350195169,-1.9712  
2695437106,0.0486979221344521,0.11412404877134,-0.900319352578192  
"Zfand1",1703.66388484312,0.328788148792404,0.175637982943997,1.871964  
95474011,0.061211452110787,0.135655932400105,0.656798222961024  
"Cplane1",977.636994614794,0.0510598030810252,0.184046147682799,0.2774  
29349779306,0.781450447874322,0.858793869499128,0.00777264752893332  
"Ncoa5",2090.63666701868,-0.0402198032825189,0.127129255975657,-0.3163  
69375198895,0.751722159151655,0.838578454495305,-0.00708058121079852  
"Gabbr2",15.3071905386497,0.513136402119231,0.548601021219182,0.935354  
442065862,0.349605667036019,0.494602473941974,0.361248500205145  
"Zc3h10",792.04043560502,-0.134978431190813,0.0958798474314643,-1.4077  
8729635857,0.15919406315797,0.280318431668204,-0.171669492077051  
"Tbc1d2",569.091568392267,-0.397009191763515,0.33277276130292,-1.19303  
391963058,0.232856089081943,0.37014740134679,-0.394569161622116  
"Xkr5",9.25421103626397,-1.4899781512307,0.694721292190627,-2.14471352  
466027,0.031975758876426,0.0825014353013835,-3.71740547505897  
"Myl6b",405.871714987874,0.331846452330125,0.26188294792533,1.26715563  
177769,0.205099646775189,0.337784687289689,0.360168420860963  
"Trub2",914.473732953521,-0.429294513224903,0.216442830687724,-1.98340  
83293998,0.0473218374832436,0.111610159338125,-0.941332624534904  
"Wdr70",1026.58146037303,-0.0969465748565204,0.194325032874925,-0.4988  
88760867567,0.61785775224204,0.736323602054599,-0.0296739486112398  
"Olig2",0.411743783806052,-2.26145946411319,3.03877037191005,-0.744202  
1565755,0.456754183553175,NA,NA  
"Arhgap29",4858.82726589442,-0.251565657008242,0.19302632089505,-1.303  
27126291248,0.192482168345385,0.32245187029799,-0.284722361100733  
"Zfp335",1133.48234844129,0.0668679282526287,0.180355218000592,0.37075  
6826411362,0.710818660584678,0.807944418794408,0.0142603888805075  
"Nhsl1",1032.64889688158,-0.0752945564139606,0.183152509662841,-0.4111  
03055877136,0.680996969317128,0.785313396483638,-0.0181966168844952  
"Slc45a1",0.391392629669804,-0.472401035078842,3.86698422561197,-0.122  
162648595775,0.902770206945453,NA,NA  
"Epg5",979.890017479155,-0.0595784427454921,0.152024121340631,-0.39190  
124711853,0.695131181480805,0.796899563529676,-0.0135258928560535  
"Zfp800",494.796758361881,-0.364284694505245,0.168383623475089,-2.1634  
2116286111,0.0305088013220059,0.0796652749667164,-0.921611675252095  
"Mcph1",246.569002322144,-0.492320412512107,0.261696509654892,-1.88126  
472592755,0.0599359168521185,0.133466252487735,-0.991487339619121  
"Rapgef1",3425.97008339969,-0.569608713440191,0.16853268475893,-3.3798  
1154370716,0.000725355476279551,0.00459486064863505,-3.06609938082525  
"Pcif1",2435.36775412612,0.428381920203053,0.135147984468113,3.1697248  
1601547,0.00152583369052921,0.00815758302658035,2.06000612716682  
"Endov",956.226055404231,-0.169600496394496,0.173443388228149,-0.97784

3538039062,0.328151713968066,0.472792589887634,-0.127047475046755  
"4932438H23Rik",17.8658206824117,-1.03538368799169,0.545331553533463,-  
1.89863154127603,0.057612938313652,0.129655709976868,-2.11515709765612  
"Rere",7669.1097764279,0.270917065322207,0.105074887040786,2.578323640  
90049,0.00992809635777071,0.0335723244508868,0.919506940206689  
"Trim14",154.372080957885,-1.48725072963582,0.268586596171164,-5.53732  
297455389,3.07129869014376e-08,1.88315037296928e-06,-19.6057786016254  
"Srrm3",18.5143648349358,-1.13707908555185,0.519053977114344,-2.190675  
99071947,0.0284752477225297,0.0756327998847241,-2.93578495358445  
"Slc44a3",616.966999493323,0.0404249777079034,0.295524682623749,0.1367  
90529132793,0.89119636992862,0.932668499858742,0.00281784113658419  
"Neurl2",109.78905461163,-0.687647737362043,0.229404116287963,-2.99753  
879088579,0.00272169218954418,0.0125871808139783,-3.00851137255726  
"Slc39a5",848.085047854257,1.84099986308922,0.782014920232248,2.354174  
85710179,0.0185638762953883,0.0542503687061573,5.36494144840258  
"Heca",2129.26687418164,-0.148667594964092,0.116758523642955,-1.273291  
15104876,0.202914745612872,0.334978554733704,-0.162596078320864  
"Lrrc17",205.728809848608,-1.34661405836163,0.304633082825985,-4.42044  
588811405,9.84974489077073e-06,0.000168761270545033,-11.6980705855786  
"Tmem120a",2958.77812325268,-0.000631217930139416,0.471655908773016,-0  
.00133830175430536,0.998932190011295,0.999496066138463,-3.181722646306  
06e-07  
"Alg14",799.257390822649,-0.793804448469053,0.321849737557276,-2.46638  
215240983,0.013648563214715,0.0430823515558546,-2.49623068333364  
"Txlnb",49.6157878338401,-0.885163078719471,0.277502056864592,-3.18975  
321740188,0.00142394332127191,0.00773156415431907,-4.30405597929999  
"Fgl2",1817.80180072404,-1.69855301157225,0.448724468243434,-3.7852917  
1413667,0.000153528377338543,0.00138453178418425,-11.1805438925093  
"Armh3",720.571237414332,0.0692606976586767,0.1321894505068,0.52395026  
5268058,0.600313132373695,0.722123848172146,0.0225484171455125  
"Eva1c",154.779360083427,-0.302200519999558,0.269702527832696,-1.12049  
568992924,0.26250258825793,0.404191381651515,-0.273753416871115  
"Gpr37",68.2258096604494,0.636321568776097,0.312344403586238,2.0372433  
8092842,0.0416256585690739,0.100872121647999,1.45965911986596  
"Slc26a11",655.313046229351,0.117914700122307,0.141247543199401,0.8348  
08857212094,0.403825338086798,0.547627378078758,0.0710035382678941  
"Cited2",3058.61676806146,0.411623366373035,0.26105851125284,1.5767475  
4367373,0.114853625995368,0.219035211234123,0.625059458699522  
"Spsb1",709.055747980078,-0.972487243666374,0.212805355882753,-4.56984  
383514376,4.88087777970114e-06,9.77077566207523e-05,-8.97948975958335  
"Pak7",2.63500221239135,1.3452128803249,1.35441595455489,0.99320513450  
9051,0.320609996664569,0.465887607245795,1.02748820715789  
"Coq10a",1388.22766751023,0.105535880969219,0.243437895102,0.433522812  
563753,0.664634996741061,0.772651756259624,0.0272205364191577  
"Rhbd2",1914.80157427266,0.128393246126889,0.245598183532142,0.522777  
669933727,0.601128980722043,0.722793097318598,0.0416805909721904  
"Urb1",682.316128005172,-0.585825074269848,0.221730549705676,-2.642058  
45810363,0.00824038316690304,0.0291122884103876,-2.07182597686573  
"Gsap",1035.1109214741,0.108980181137549,0.373145082355073,0.292058468  
115752,0.770241920564736,0.851274060036913,0.0175481149175723

"Pik3cd",1520.52662990059,-1.07094517074951,0.400518225436888,-2.67389  
872104152,0.00749750904113898,0.0271570557837874,-3.86195506938088  
"Ptger4",961.535711078158,-1.06275739437333,0.224948900401211,-4.72443  
916141771,2.30751280885058e-06,5.32448340200813e-05,-10.4581808001105  
"Plcb4",1085.73893576625,-0.641552499456301,0.318146198233922,-2.01653  
360315998,0.0437442080710064,0.10506584983598,-1.44552555189458  
"Dag1",7060.86862581165,-0.89357255955797,0.163578584836956,-5.4626500  
1894117,4.6907882475988e-08,2.5983235582864e-06,-11.4919186715187  
"Clstn1",4848.04410090782,-0.0734908420633168,0.155780431181008,-0.471  
759138847962,0.637098719741143,0.751551866109873,-0.0209900909266492  
"Stk32a",185.010735442572,0.628857822984649,0.525606446317428,1.196442  
37126587,0.231523974809679,0.368480488191913,0.627831223927113  
"Mrap",1506.56193163824,-4.02682927898769,1.41643764444042,-2.84292732  
178728,0.00447012625356105,0.018203534187956,-16.1320399051799  
"Etfbkmt",846.179991574294,-0.418732148007849,0.244401695241418,-1.713  
2947772487,0.0866583227478219,0.17668764790725,-0.725818499797045  
"Hip1",2583.71769085859,-0.943866416284222,0.188927248294871,-4.995925  
28236619,5.85543299061019e-07,1.78389425704558e-05,-10.3203549887421  
"Rhou",1099.85988002819,-1.29075902242245,0.236450619972843,-5.4588946  
4181019,4.79107943401293e-08,2.6388832430617e-06,-16.5799993806094  
"Olfr906",7.16320097948153,1.03611155745706,0.546883411880887,1.894574  
84894921,0.0581487494873085,0.130500036545067,2.10991868955121  
"Ccdc40",29.3368627829473,-1.32138639673151,0.796930312832657,-1.65809  
528819991,0.0972982347931081,0.193174820854554,-2.17257025177237  
"Zfp292",1684.61263396667,0.227227724865447,0.161969399545073,1.402905  
27410527,0.160645087943001,0.282245849983283,0.287437795589983  
"Rsbn1l",2882.68209771757,0.119780988692002,0.192112964290886,0.623492  
480760623,0.532960941930765,0.665152176007557,0.0488394318629044  
"Tbc1d16",1508.30821475733,0.151168979584819,0.196884200906442,0.76780  
6552729202,0.442602120945789,0.584085018896853,0.081284879490825  
"Deup1",20.2095090907835,0.233227431392377,0.384959088390273,0.6058499  
16071939,0.544614419830915,0.674788617274026,0.0917413620989192  
"Zc3h12d",186.765162402558,-0.60589375168412,0.465857941164205,-1.3005  
9766754208,0.193396205850571,0.323647020064466,-0.683509832677955  
"Dtx4",2963.84595798307,-1.36932477900508,0.222348714942203,-6.1584560  
0619289,7.34575840108097e-10,1.22416749832715e-07,-21.7939467390385  
"Ccdc32",833.161672278271,0.356140433220995,0.0856249420283587,4.15930  
714561001,3.19214412398487e-05,0.00040840174625628,2.7790561105404  
"Sinhcaf",1078.34125785676,-0.155417301550469,0.200814777251507,-0.773  
933590334437,0.438970064323595,0.581042638028986,-0.0843808923194864  
"Phtf2",649.881262423837,0.0499956118032203,0.118666364043283,0.421312  
409850062,0.6735269695012,0.779418888440524,0.0124592390211631  
"Ankrd13c",9547.23468002649,1.25996126254944,0.290974314125214,4.33014  
60004722,1.49010512657769e-05,0.000230404994115875,10.5530222092662  
"Cbx4",1689.50457957931,-0.643439553138044,0.319329777261509,-2.014968  
84711479,0.0439079133395835,0.105355217117302,-1.44800770662806  
"Edrf1",1271.35678406927,0.354098806762164,0.183008486585008,1.9348764  
276988,0.0530054614712505,0.121531101571783,0.746293358062879  
"Timeless",819.105499599765,-0.558778537916675,0.207360199209503,-2.69  
472415654907,0.00704469243059757,0.025887186771917,-2.04178077388782



"Ifi203",4442.43557086709,-0.587972287701508,0.291549822732481,-2.0167  
1289727045,0.0437254832210282,0.105033814444204,-1.32497963883118  
"Magi2",683.571924505518,0.281502943591664,0.355276562321206,0.7923487  
59941997,0.42815734784209,0.570974076207172,0.157757478721627  
"Ginm1",4604.78673334731,-0.0742048247664255,0.307392852674414,-0.2414  
0061852714,0.809244633409744,0.87822551595972,-0.00963563499458638  
"Bahd1",2471.74761446838,0.181338834921295,0.100838511538994,1.7983093  
180741,0.0721280039309325,0.153481591252354,0.339860646715916  
"Gnaz",229.94657940084,0.204696782260381,0.280418236646729,0.729969579  
397427,0.465408779548212,0.604204033799257,0.103135109189531  
"Slc7a5",306.315112554678,-0.845591628636698,0.353169662743292,-2.3942  
9293577611,0.0166524430794457,0.0499752709193523,-2.53358444968023  
"Fkbp6",2.79031123211778,1.9135386309189,1.12644147671602,1.6987466019  
9619,0.089366938663362,0.181076217700908,3.26992608050116  
"Ptger3",1564.92041366186,-0.624133655355666,0.512089575457289,-1.2187  
9781442206,0.222920941254813,0.358860015900458,-0.63962645916741  
"Saa4",5.73797934547642,1.61227313897815,0.864718707940451,1.864505907  
15007,0.0622506928050857,0.137241520614378,3.20199538307075  
"Cox15",1738.05205038591,0.136052238361544,0.282444519432957,0.4816954  
44594521,0.630022312624444,0.745806268687476,0.0399026801676308  
"Lats1",2195.45383310698,-0.135641013698567,0.108640539836796,-1.24853  
037275342,0.211836892695024,0.345929290935308,-0.143985769075554  
"Rab11fip2",985.551849350785,0.0272664197027401,0.118530764771265,0.23  
0036647070974,0.818063292966725,0.883298155181371,0.00338355747219936  
"Ythdf2",2047.31245846857,-0.00486842999713609,0.15482856747387,-0.031  
4440033681622,0.974915448872732,0.984509085463048,-7.60066712619969e-0  
5  
"Saa3",51.6646095388919,-1.54875803692876,1.00018696179597,-1.54846853  
247094,0.121509532256893,0.228817349906597,-2.28415666224995  
"Elavl1",3034.89664206622,-0.171162449169358,0.15473753979026,-1.10614  
68949381,0.268662943946862,0.41091858182271,-0.152225066921687  
"Ipo8",2647.709150589,-0.0173341646379761,0.107919152547693,-0.1606217  
638738,0.87239131237388,0.920135116312274,-0.00144280493231355  
"Stat2",3391.09968306234,-0.508592381592888,0.347794905755907,-1.46233  
418941977,0.14364965391844,0.25930481144889,-0.686473091454343  
"Nup43",332.586383513894,0.0693469997634809,0.140853830284066,0.492333  
077656643,0.62248390018517,0.74047898760359,0.0208358623552048  
"Disp2",17.9475861048281,-0.378222283459855,0.56135770133999,-0.673763  
41779407,0.500461735895928,0.635617699745884,-0.171394452546293  
"Negr1",603.670888986331,-1.39979777275971,0.461759281157552,-3.031444  
80225855,0.00243386415972041,0.0115829834967607,-6.24060390377687  
"Ift88",956.941159330809,0.680492105176808,0.182303046551881,3.7327522  
3891089,0.000189398873929477,0.00162429109418756,4.3705856254697  
"Rbms2",1673.64725747405,-1.3292580762246,0.365322299405211,-3.6385900  
2964997,0.000274134796015185,0.00215180364440583,-8.16357052897876  
"Orc3",1628.66816854009,0.190224542026764,0.152914688868919,1.24399129  
628304,0.213502766276073,0.348037533387749,0.200771532335914  
"Tph1",12.7002522945525,0.900671007256913,0.623885526910387,1.44364786  
232055,0.148838054301189,0.266486554289164,1.19107570176427  
"Ndufb10",9411.60806399215,0.757556826135681,0.301243542950522,2.51476

535800837,0.0119111628227949,0.0387978370729794,2.46159816575357  
"Baz2a",5193.36142415643,-0.0855758133240129,0.163392899053356,-0.5237  
42548298063,0.600457617641436,0.722231598322123,-0.0278471756280461  
"Gjb6",214.445923216895,-3.38952771480398,0.860020326764075,-3.9412181  
4254957,8.10688569325396e-05,0.000840340548894555,-24.0036297150024  
"Plcb2",732.050075176732,-1.08424247819015,0.402242234480681,-2.695496  
35828264,0.0070283846067718,0.0258418712168276,-3.96372940077196  
"Ptges3-  
ps",3.14558689973894,1.27705761954137,1.51138766430169,0.8449570217522  
,0.398134835553882,0.542551930642269,0.780884304317639  
"Bub1b",231.586954109796,-1.05947171437634,0.311543710852531,-3.400716  
10329453,0.00067209588576473,0.00432635377373414,-5.76673651229526  
"Tnni3k",0.656008158460642,-1.7599922729469,3.06618025418848,-0.574001  
567762594,0.565966740371602,NA,NA  
"Bmf",1734.57674780429,-0.711142715131303,0.263686735951827,-2.6969225  
9098396,0.00699835366671276,0.0257411620059546,-2.60254334639091  
"Flywch1",3060.35426849313,0.0019250211306659,0.240318540132205,0.0080  
1028971633609,0.993608781856327,0.99595846332689,7.79580765025938e-06  
"Klhl42",1313.56725493257,0.0822089405113429,0.119986282910785,0.68515  
2823447901,0.493247490031023,0.629530638255213,0.0380447156318556  
"Plpp6",1512.18427528758,0.141563078037687,0.245982646139134,0.5755002  
64996806,0.564953011487283,0.692644567194389,0.0519873843218817  
"Gramd1b",5189.47956666558,1.41708135412994,0.238649893329126,5.937909  
01961818,2.8868015642102e-09,3.21189920567974e-07,21.1871138398618  
"Mrps35",1986.91104553322,1.02304444486379,0.237354877285028,4.3101892  
6834718,1.63114879616117e-05,0.00024521310121473,8.5049602190382  
"Cacna2d1",1022.80330027391,-0.786517955648639,0.272156042684487,-2.88  
995220495786,0.0038530040213031,0.0163175222431294,-3.23692704538498  
"Rep15",207.922431410376,0.308332663378125,0.308278120771515,1.0001769  
2662221,0.317224893311405,0.462379529773923,0.237838329788718  
"Zmym5",3708.3501434083,0.283643181929744,0.141986515502974,1.99767689  
857705,0.0457517003127081,0.108510722867921,0.629944924766988  
"Gorab",431.784446131026,-0.26113518705625,0.116565725518508,-2.240239  
88093127,0.0250753538577879,0.0686292075218737,-0.699590846206037  
"Gpr26",28.7285381982223,0.46228813524826,0.412988947825191,1.11937168  
702136,0.262981604519094,0.404833043179638,0.418038162697348  
"Sdr9c7",2.42433959120787,-0.0254052280355529,1.05009230675641,-0.0241  
933284075057,0.980698399733826,0.987535887931113,-0.000318643565051592  
"Pnrc1",4767.18249620823,-0.268078026252856,0.102332368146235,-2.61967  
968795335,0.00880123916922114,0.0306549770134823,-0.934241264749863  
"Gpr176",180.725250358101,-1.97007392144514,0.489967985255697,-4.02082  
172862177,5.79954828236843e-05,0.000649136580996668,-14.4600813812044  
"Rdh7",22.2646746256924,1.18829834827605,0.408436200598801,2.909385472  
03678,0.00362140044207055,0.0155975404946966,4.94408406122951  
"Abcc8",46.7971250164429,0.0524988090252665,0.557292878092654,0.094203  
2656238937,0.924947690719855,0.953910402711083,0.00247718409872158  
"Ndp",34.552284387048,-0.977084682620704,0.456052236534943,-2.14248413  
744121,0.0321545437848944,0.0828749893876894,-2.43335314894009  
"9430038I01Rik",287.817361539697,0.222932854220711,0.196329287296223,1  
.13550483114803,0.256163858845859,0.397002060231822,0.205948449165984

"Tdrd6",11.4984035197451,1.32056531960983,1.11930625522152,1.179806968  
33369,0.238076997412857,0.376238069018957,1.29089640791733  
"Rgl3",4133.96510683527,0.713081241081959,0.303138129717532,2.35233107  
015081,0.0186561617366089,0.0544792334192603,2.0750205519427  
"Maob",616.345872580117,-2.54832530884656,0.643069570016239,-3.9627521  
3081877,7.4090694479674e-05,0.000780875870791721,-18.2335080371347  
"Hmx3",6.19585376287822,1.79106786231523,0.693258141002457,2.583551142  
6167,0.00977889676731525,0.0331886734846149,6.09956510715202  
"Hs2st1",1289.47090539638,-0.461215531857159,0.143352116291016,-3.2173  
6116487361,0.00129375625182275,0.00716434518547006,-2.27777683436123  
"Thbs1",5159.08490784673,-1.0526322624108,0.176943537751963,-5.9489726  
2586873,2.69830757187584e-09,3.09850777959792e-07,-15.7759839450585  
"Wfdc5",0.374182831059447,-0.183419022418386,4.67310928262479,-0.03924  
98893831483,0.968691158280221,NA,NA  
"Tax1bp3",2853.76348157776,-0.132675625177739,0.149582917248372,-0.886  
970434982494,0.37509481814155,0.520170609112656,-0.0867165798869579  
"Kcns1",7.19189462327047,2.30017393523576,0.782164459065744,2.94078043  
124486,0.00327386508145774,0.0144334933575758,9.74860601780366  
"Cd209c",336.523443049991,-0.655574374520678,0.366975296329227,-1.7864  
2644635278,0.0740302367503647,0.15678381712693,-1.21470548748918  
"Ikzf5",1411.65653759919,0.458439458501178,0.3688235387491,1.242977766  
70117,0.213876026539688,0.348558572841092,0.483171805007932  
"Fmo2",7840.69704754609,1.45011625601257,0.329838438171745,4.396444101  
69535,1.1003868170302e-05,0.000184482735670291,12.4680338390004  
"Alkbh3",1044.60289401037,0.274715042432298,0.172059286146369,1.596630  
14176754,0.110348175958663,0.212270001464286,0.425779806619731  
"2310057M21Rik",423.09333251365,-0.393822574472246,0.26741869580474,-1  
.47268153143564,0.140836928789827,0.255397920158486,-0.537541222814891  
"Fmo1",14221.1327092272,0.793263872996976,0.524645760280456,1.51199901  
543649,0.130534113010025,0.240767584473509,1.12954682501193  
"Ankrd6",546.249300683695,-0.416804302535665,0.394388883037851,-1.0568  
3582996852,0.290586518873879,0.434291736856911,-0.347630946138131  
"Arntl2",349.532726762776,-0.949489915710587,0.303654139330293,-3.1268  
795406665,0.00176672299041618,0.00909626745897401,-4.46249922237631  
"Scamp2",5258.98221149742,0.563099527512652,0.158413186869836,3.554625  
33542321,0.000378518053353395,0.00276728346617341,3.31659379077405  
"Ccdc114",867.62845998399,0.713558530414972,0.321395249697463,2.220190  
03419204,0.0264058705242498,0.0715284333817482,1.88212496363009  
"Nemp1",420.0184444658401,-0.0785988033234962,0.168983673641503,-0.4651  
26610338954,0.641840790734237,0.755302778546452,-0.0220576992732696  
"Cd209e",3.24672369431393,-4.41042201142764,1.5746687175996,-2.8008570  
705277,0.00509670872943485,0.0201736960630371,-17.2155340983845  
"Pclaf",402.307991868822,-0.627528148645524,0.370159931420035,-1.69528  
923954074,0.0900205650756281,0.182008522558337,-1.06912081491029  
"Cuzd1",5.29045163477295,-2.91857704273355,1.40709410057908,-2.0741875  
3410481,0.0380618975144034,0.0944066757073958,-6.88826061065715  
"Zfp704",3851.34756491663,0.55809464990211,0.174635080018856,3.1957763  
0016747,0.00139455187654566,0.00759736588122023,2.72347604411862  
"Emp3",1316.63859546415,-1.14736244220089,0.304382001207234,-3.7694818  
9331249,0.000163586775203689,0.00145378985547927,-7.49638595602288

"Kyat3",1482.15970997463,0.838807620625814,0.436290745952616,1.9225886  
1414611,0.0545317350482354,0.124122437613076,1.75016102853626  
"Ttc12",853.841126167607,0.235079124395892,0.127464884980444,1.8442657  
7117265,0.0651444172743019,0.142015412345074,0.458832063616718  
"Gas8",982.941037856166,0.171410362945779,0.186967525446619,0.91679216  
771106,0.359251557640541,0.504369734366018,0.117321082413659  
"Prcc2c",6118.63380206612,0.0370164885750309,0.169999162713051,0.21774  
5122883414,0.827627704117364,0.89012548816153,0.00430845379753599  
"Gpr34",205.498144070505,-1.41756697995692,0.406234014138361,-3.489532  
95544106,0.000483865392543938,0.00337304519979324,-8.06870523552282  
"Syngr4",1.89536930522096,-0.0255149538491038,1.12762577729193,-0.0226  
271466677355,0.98194768945896,0.988436553901435,-0.000296759903101581  
"Tm7sf3",3452.5593000408,0.775443344885782,0.194073354214015,3.9956198  
4192152,6.45252057542941e-05,0.000704824908569874,5.62782748815882  
"Trappc5",1719.70962941038,0.218252100179105,0.112762443398551,1.93550  
346729991,0.052928543593948,0.121426137544981,0.460173449106673  
"Fgfr1op2",3790.50694231539,-0.0153062335281834,0.137166543493688,-0.1  
11588679996793,0.91114954801441,0.945280083387515,-0.00086134315186050  
4  
"Tbc1d10c",544.32344597283,-1.14918493405101,0.428525392052591,-2.6817  
1957919817,0.0073244828429515,0.026674031840095,-4.16472064187668  
"Lrp1",7549.1313596515,-1.64456358405116,0.229655593788243,-7.16099946  
412605,8.00909625061939e-13,7.09824357702622e-10,-34.6443823162926  
"Ints13",1649.69443629184,0.196787897683526,0.0826111980071028,2.38209  
713005986,0.0172143562945876,0.0512984134237916,0.584478840448855  
"Gbp7",2723.25509008417,-0.502405518086974,0.316968012139824,-1.585035  
39425091,0.112958292753421,0.216266770631009,-0.769304723794782  
"Sema3d",615.330255184104,-1.45758789033722,0.44226401723908,-3.295741  
53338654,0.000981622814546474,0.00578845366853226,-7.50933261103742  
"Nxph4",119.692190143273,2.28640843876608,0.581077178987613,3.93477582  
917574,8.32743841461739e-05,0.000857730555775012,16.1448342428874  
"Daam2",1712.79305412867,-0.685280766793674,0.281846052047229,-2.43140  
097871175,0.0150405589166031,0.0462775473813993,-2.10593520967169  
"Klhd4",1893.44109253411,0.22555913338925,0.162190772571802,1.3907026  
263741,0.164315620878811,0.286978321022488,0.281576428966202  
"Gbp2b",101.489161248689,-1.70283492959229,0.719892050130326,-2.365403  
15910422,0.0180104528682965,0.0529984621228562,-5.0020646341635  
"Dnm3",640.577163952581,0.280483074752499,0.264005922285375,1.06241205  
62315,0.288048662933236,0.43212840115967,0.235334418220412  
"Plekha1",4078.40340131942,0.161432390420148,0.169427504440849,0.95281  
1002870596,0.340685838456148,0.48536405657007,0.116692378067263  
"Mrps28",986.126117288848,0.557148573133834,0.264017525767206,2.110271  
17050211,0.0348350053298078,0.0880950627653168,1.35350263987576  
"Bach2",342.601758227953,-0.0781489039942948,0.267999748168979,-0.2916  
00662046221,0.770591969184102,0.851516135741095,-0.0125614070393528  
"Accs",723.300155221458,-0.168585170406285,0.159121229707828,-1.059476  
29185517,0.289382920859035,0.433230051513319,-0.141019201489185  
"Cdk6",2748.25231975372,0.18658894914194,0.284861440183462,0.655016519  
686797,0.512457118069088,0.64659864674245,0.0813582874267209  
"Pacs1n1",95.606916985429,-0.39076343589418,0.460131012239443,-0.84924

3857727274,0.395745613578867,0.54012655561814,-0.24069144352109  
"Ndufa4l2",351.42389621978,-0.647744275372587,0.221966481523805,-2.918  
20760921112,0.00352049869653337,0.0152947155938074,-2.70773164444648  
"BC052040",304.719057031982,-0.0341097599683368,0.13181765264486,-0.25  
8764735101409,0.795816768637985,0.869241799053467,-0.00477993514711246  
"Btnl9",1679.85900124422,-1.8598388728388,0.69330551210693,-2.68256755  
55165,0.00730593943269189,0.0266294156048811,-6.74329000835843  
"Stac3",115.641952198245,-0.116877699334597,0.238871755260823,-0.48929  
0578565805,0.624635990213867,0.741997839477883,-0.0348773512532924  
"Hey1",133.704205571741,-1.0710989717409,0.323578368755528,-3.31016864  
897464,0.000932397738936278,0.0055662270292408,-5.5601152799776  
"Ddx58",2835.50419050733,-0.43000194332146,0.262383323173465,-1.638831  
07402059,0.101248445656021,0.199232998461033,-0.69371366095141  
"Suco",2514.62801189083,0.193550309267481,0.106883652928823,1.81085043  
375503,0.0701640069523642,0.150352545066183,0.366733792156228  
"Btbd16",17.5948899136537,0.857533716381243,0.552183836816179,1.552985  
90651561,0.120426501628592,0.227086646881458,1.27122824469187  
"Rbm48",426.181354874738,0.0563247715995446,0.166401312365709,0.338487  
544351554,0.734995811912872,0.826648853340777,0.0107228440009409  
"Alx4",11.593025738076,-0.679766034152273,0.484628279414549,-1.4026544  
9423104,0.160719893225746,0.282316799830233,-0.859717393198228  
"Cchcr1",1111.71201697563,-0.208579682292067,0.203377007667283,-1.0255  
8142970269,0.305088924474758,0.449767416407745,-0.166660314369157  
"Zfp770",502.699264601411,-0.387822791954262,0.129450302566607,-2.9959  
203205007,0.00273617919799405,0.0126332043576813,-1.69533889395383  
"Slc25a24",1252.03833889515,-1.25069877257517,0.221817962687679,-5.638  
40167595518,1.71635775813054e-08,1.23489090656935e-06,-17.015166379197  
9  
"Gm15429",0.25587404954482,0.4.78471990596088,0,1,NA,NA  
"Dcaf1",1205.27202563683,-0.134206563187071,0.230203585650776,-0.58299  
0759278032,0.559899520951241,0.688348566265745,-0.050120774006331  
"Cul9",2532.62221247243,0.724973466729567,0.214365801419332,3.38194554  
322314,0.000719744111485707,0.00456821962426703,3.90661502544162  
"Olfr56",38.1896813105298,-1.25152339816731,0.527539995820907,-2.37237  
632801624,0.0176740788357999,0.0522451772499131,-3.69425639572394  
"Il7",99.2309991242168,-0.344797454099618,0.230742773459954,-1.4942936  
1938158,0.135098892127153,0.24726914471935,-0.481777855991188  
"Nsmce4a",2403.70795141849,0.306050001606395,0.166413874620521,1.83908  
945275321,0.0659020300894041,0.143242193768796,0.594722000144118  
"Fam102b",1492.67869610337,-0.100813052500515,0.153728049708058,-0.655  
788274761613,0.511960361690921,0.646180938131123,-0.0440226127327783  
"Tex45",2.29450344892923,0.124031847927631,1.26819131761554,0.09780215  
824284,0.922089393572159,0.952029272021625,0.00609734322405355  
"Arhgap9",1071.80191038112,-1.11017037599824,0.353943623067909,-3.1365  
7402943305,0.00170934277044398,0.00889478658609999,-5.24254641016468  
"Trim7",7710.09162167318,1.35232119712045,0.422377578857534,3.20168793  
234306,0.00136624921752504,0.00748500344009646,6.61941455259017  
"Ankib1",3644.01875713248,0.861653637396909,0.17122681621853,5.0322353  
4973176,4.84793594925233e-07,1.53201061812839e-05,9.55258903179174  
"Mars",1769.03745162271,0.339027441755657,0.20803935794564,1.629631263

54314,0.103179452728756,0.202027813748272,0.542223504810302  
"Skiv2l",5564.77572608338,0.224442697509131,0.113730918662301,1.973453  
658416,0.0484438993751156,0.11367904080106,0.488022867120679  
"Ufl1",1695.64717556695,0.041723045758028,0.118833987214616,0.35110364  
2451006,0.725510595412345,0.819298366115481,0.00831569324845487  
"Bcor",1172.75825353468,-0.581689643788707,0.145697949097452,-3.992435  
35953712,6.53981634050662e-05,0.000711569972138382,-4.2161079447855  
"Sec1",12.6066422338552,0.586060587872386,0.470475265689786,1.24567778  
714814,0.212882711741989,0.347271949019225,0.61984527604573  
"Trim41",3649.352511678,-0.261848816991548,0.198499147379486,-1.319143  
28322505,0.187121215274897,0.315913884789154,-0.301724626177967  
"Lrrd1",24.8551418800724,0.369028642278568,0.418212170627263,0.8823957  
50762284,0.37756283279616,0.522775182066434,0.239353368450155  
"Etfrf1",2060.38463584214,-0.0946822113426949,0.462712035379151,-0.204  
624483703155,0.837865524913453,0.896388779904753,-0.010356440069211  
"Gpr63",18.3467163465528,-2.40792922635747,0.720335891850392,-3.342786  
68271271,0.000829416321693568,0.00509995567340939,-12.710310840983  
"Cacng5",1.96981341168619,0.630341872549821,1.25438984028453,0.5025087  
51511287,0.615309697919327,0.734499111670812,0.194502380879461  
"Pex2",2313.38722371409,0.408348742734839,0.118203137474544,3.45463539  
682084,0.000551037455005012,0.00372930520572292,2.28329560714439  
"Cbln3",16.7640996894499,0.0637494151287315,0.43262268478565,0.1473556  
92086089,0.88285127626687,0.927069915157875,0.00482750704021381  
"Aqr",1507.14175926492,-0.348801327445188,0.134061836924826,-2.6017943  
3197515,0.00927374488831706,0.0319469042106724,-1.20116015448298  
"Ppp1ca",8348.64092058197,-0.467649088230164,0.222525326095191,-2.1015  
5444522353,0.0355923239394229,0.0896498039233777,-1.12789677197987  
"Klhl32",302.789916070465,0.999370065831996,0.379372891287597,2.634268  
52256133,0.0084318775122964,0.0296331556839862,3.51664476902349  
"Wdr47",752.838636643834,-0.149078296548867,0.128972431694899,-1.15589  
273296429,0.247725035468186,0.387060076347524,-0.141501446087167  
"Map3k10",1282.99186354818,0.262023240454167,0.126156263399133,2.07697  
369432367,0.0378039871923596,0.0939103251722037,0.619793687486821  
"Abhd13",1284.1870755898,-0.155422276937867,0.151804885852697,-1.02382  
921382834,0.305915949235811,0.450410901302331,-0.123964030795146  
"Havcr1",2623.99465732397,-1.12608552482434,0.629208889875972,-1.78968  
470239877,0.0735046130139689,0.155917422165619,-2.0927497221495  
"Akap9",3425.70925560277,0.47664852534844,0.286048452688378,1.66632093  
573218,0.0956495090138592,0.190751163624039,0.78970436948289  
"Fbxl4",1045.59529144387,0.0812535344017423,0.251231804713044,0.323420  
573659253,0.746376750550041,0.835055102821876,0.0146465642511969  
"5330417C22Rik",33.4358331233533,0.323003455953149,0.401347494654753,0  
.804797489096084,0.420936550859756,0.563967626514362,0.185002951970279  
"Timd2",2119.11830409371,1.94448813055854,0.747910864769709,2.59989287  
781943,0.00932528652728888,0.0320678018887264,6.68885018173358  
"Slc25a28",2897.58209079281,0.313293731001639,0.169743264642162,1.8456  
9167832431,0.0649369862043582,0.141674091642898,0.612246751158267  
"Dtx3",7540.6182762552,-0.204643544333103,0.2114372761443,-0.967868807  
548577,0.333109894289701,0.477817753171529,-0.151134555446962  
"Cdh18",0.276057444612799,-0.542286278449553,3.97874925212163,-0.13629

5665820203,0.891587550086951,NA,NA  
"Rc3h1",1866.42665489945,-0.642959186931763,0.157343877193815,-4.08633  
115186154,4.38248154962964e-05,0.000523199524499332,-4.85790878457555  
"Hipk4",103.710671954479,-0.0885241908519829,0.339486052606355,-0.2607  
59433774528,0.79427802952941,0.868052072435444,-0.0125264894650304  
"Plekha4",585.684126113754,-0.60269943788082,0.283132603446362,-2.1286  
8256973802,0.0332805318889938,0.0851468062946597,-1.48467676454753  
"Mterfla",456.006987139775,0.201722066227332,0.13168735104533,1.531825  
68125237,0.125565456930404,0.234351993800039,0.292684808726378  
"Pitpnc1",2916.53422147973,0.642196232443163,0.182413370233971,3.52055  
461515489,0.00043064529649147,0.00307122238148891,3.71554165843199  
"Ltb4r2",26.7813830966287,0.0689295121140429,0.497511680552307,0.13854  
853023254,0.889806917829487,0.931914663148699,0.00486049779771746  
"Zbtb38",2346.72698123049,-0.175000149478399,0.165246659845065,-1.0590  
238231894,0.28958893026341,0.433338830566076,-0.146341309212009  
"Large2",1282.94291324739,0.91567586106312,0.323271579788402,2.8325281  
8469993,0.00461814947075759,0.0186543771246802,3.64592319151561  
"Ppp1r15a",1116.52285972369,0.363355310937262,0.270906776837323,1.3412  
5589318666,0.179837384837229,0.307234673578927,0.428811377273472  
"Slc26a10",198.178879876851,-0.352887450248487,0.357654281954821,-0.98  
6671956839772,0.323803481996137,0.468717233432612,-0.267402443766195  
"Rprd1a",1858.00252228224,0.0199905980555258,0.0734309352522493,0.2722  
36734924515,0.785439997720572,0.861236591809454,0.00298631598221441  
"Spns2",5430.51891934616,-0.188928900844512,0.389090658009353,-0.48556  
5245413757,0.62727544270629,0.743683362634516,-0.0559493900718809  
"Sgms1",2264.48115184849,0.0141679929448885,0.145170669363717,0.097595  
4234211827,0.922253558739005,0.952088732371109,0.000695606548383381  
"Usp45",1078.33234116207,0.000356323646878018,0.104356429659647,0.0034  
1448675505811,0.997275639028835,0.998197146292824,6.42979180740742e-07  
"H2ap",0.40340903606095,-0.0393526536456841,2.64281949187166,-0.014890  
4054048029,0.988119614453145,NA,NA  
"Arglu1",8709.91314707343,-0.141107556718175,0.156661649067107,-0.9007  
15379663414,0.367739669303193,0.512778951017211,-0.0942472076670393  
"Os9",9118.60065525661,0.26694409361872,0.108653494300985,2.4568385520  
9707,0.0140165662438618,0.0439946890893137,0.833849622748495  
"Mybbp1a",3693.35545670512,0.260979771874683,0.143508637690845,1.81856  
490364644,0.0689778363414071,0.14849617455943,0.497739598299846  
"Gtpbp10",1227.31878608091,0.430858075732912,0.116249113288144,3.70633  
429835247,0.000210280703922544,0.00175967946999217,2.73277060191056  
"Blvrb",1159.72454946097,-0.36390123929734,0.222057834125385,-1.638767  
84951376,0.101261617332487,0.199232998461033,-0.587074697820591  
"Ggt6",360.008052988198,0.867766029369341,0.378866299319793,2.29042812  
973153,0.0219965104218558,0.0620497627611899,2.41223214080832  
"Rabggt",3176.98988374195,1.11696005094426,0.255472946548953,4.372126  
54424932,1.23042170148858e-05,0.000199590368848789,9.51565459513921  
"Cfap69",864.874155028059,1.35561816561808,0.431717775859565,3.1400564  
0124267,0.00168915310587736,0.00882742086797021,6.41192805135513  
"Prdm13",0.0810182756847091,0.478471990596022,0,1,NA,NA  
"Dgkz",4392.29279594841,0.200066203581972,0.207502254595963,0.96416399  
8948012,0.334963710556238,0.479665278233367,0.146981988640074

"Bptf",5077.0426955397,0.164596243140791,0.235552366959738,0.698767094  
830019,0.484697595574389,0.622172975632144,0.0781070286696211  
"Dxo",1565.77213865313,0.491586420789817,0.220297941981716,2.231461703  
03587,0.0256505615854009,0.0698804876054418,1.30809613608424  
"Xaf1",998.266422941642,-0.877498385504763,0.255889188809355,-3.429212  
4242831,0.000605335547704884,0.00399148884313487,-4.84694216190731  
"Lrrc52",33.2621037563858,2.29841656206561,0.788542491405674,2.9147656  
4308969,0.00355955730761588,0.0154026294682411,9.5917911605589  
"Ltbp4",6175.86999329207,-1.10414688327188,0.148364045358906,-7.442145  
97681564,9.90626651292801e-14,1.10565351822974e-10,-25.3130248029067  
"Sox30",6.35179489459285,-0.58279611587612,0.739705787831431,-0.787875  
565479462,0.430769494917788,0.573281251239304,-0.324255428557387  
"Lrfrn2",14.3856191412942,-0.0421438323156117,0.463695319630078,-0.0908  
86904679635,0.927582455675893,0.955515781951002,-0.00191771288174435  
"Chrm4",4.03072900904226,-1.25041575482444,1.01092034191795,-1.2369082  
9334002,0.21612113078341,0.351365780706656,-1.30784420922517  
"Igsf23",12.0844796650025,-0.282664696236622,0.513367313075753,-0.5506  
09064965754,0.58190169339025,0.706162893989114,-0.0983416879295069  
"March9",802.848969863753,0.938400217434768,0.265053618459247,3.540416  
55001609,0.000399495951637159,0.00289137790089879,5.48590841742998  
"Abcg5",6.40201840817135,0.93951975873716,0.726525871953006,1.29316765  
583529,0.19595307962689,0.32666665069811,1.0511488410268  
"Ambra1",2174.59759725849,0.0333376516426165,0.115279292783571,0.28919  
028593631,0.772435765124391,0.852772764348787,0.00530942650393526  
"Pvr",1374.20710586349,-0.42534242196656,0.140179000410081,-3.03428060  
35302,0.00241110055175733,0.0115139942586736,-1.89881027626616  
"Manea",1143.80674082519,-0.0219504468174123,0.149691845989586,-0.1466  
37558460862,0.883418106746728,0.927515278948236,-0.00165168357094612  
"Tsfm",1878.03694211114,0.491033706710448,0.271183990632166,1.81070315  
237188,0.0701868146314326,0.150368367397393,0.930345464455971  
"Tlr8",53.7753653137898,-1.65050377008214,0.476746897891583,-3.4620126  
0539189,0.00053615204326099,0.00365520718164433,-9.26197108730894  
"Zfp609",1056.57663694632,-0.355998336024778,0.245164786736649,-1.4520  
7776680908,0.146479983162902,0.263231954996338,-0.475157984192556  
"Cblc",1246.22006298755,0.824708576723278,0.231272930397651,3.56595376  
426144,0.000362535289045708,0.00268058895176838,4.88369224246401  
"Milr1",164.999997620136,-0.978932518243115,0.326667172779495,-2.99672  
755579854,0.00272894481200572,0.0126087597024852,-4.28122773650554  
"Abhd11",3102.65785296857,0.742438052851964,0.168324996514597,4.410741  
53111644,1.03017225907708e-05,0.000175426189585022,6.42082120341323  
"Matn1",1.64547141874483,-2.85866402562777,1.82454839959814,-1.5667789  
499349,0.117166369324954,0.222423315071362,-4.29706625964322  
"Necab1",6.72885182405993,-1.22210027633046,0.952229107787413,-1.28340  
991294638,0.199348502737339,0.330743456975207,-1.35214672693457  
"Adam22",396.859605778345,0.00616246585955549,0.23402312445791,0.02633  
27219215204,0.978991955635487,0.986669833155619,8.26991274862822e-05  
"Gm9770",0.462978786182601,-0.0644063810549981,3.12681166577592,-0.020  
5981005379854,0.983566255696713,NA,NA  
"Pitpnm3",898.147963429026,0.154961076279751,0.196711862421542,0.78775  
6642493061,0.430839066602158,0.57330895304314,0.0862095765352515



"Tex2",2824.82088700096,0.449617545351578,0.288092968499064,1.56066823  
738893,0.118602049236947,0.224493035241432,0.671688415015385  
"Ckap5",1277.94169476386,-0.470463451768396,0.124738928413806,-3.77158  
484324711,0.000162213983356513,0.00144554307471905,-3.07648762928853  
"Otud6b",1737.61661467319,-0.231967931102604,0.257123647835976,-0.9021  
64904142074,0.366969275126143,0.511887746917266,-0.155337307034866  
"C3ar1",639.951677522279,-1.44976021731877,0.465331736347568,-3.115541  
24525887,0.00183607669499,0.00934721237569584,-6.77426139951977  
"Aipl1",7.8451738417372,0.431519216356999,0.736494051626854,0.58590998  
1762662,0.557936009152208,0.686782595104151,0.162137948231019  
"Mettl27",1221.09122504706,0.0994639173264108,0.237096282556139,0.4195  
08548401049,0.674844508585967,0.780526647787946,0.0246458057719245  
"Wdr7",791.914140206929,-0.227906957485279,0.200999991219876,-1.133865  
50965552,0.256850966631215,0.397719198489155,-0.21013227830211  
"Gstm2",2840.29895651494,-0.311339012881448,0.19437251565048,-1.601764  
59022271,0.109207676054078,0.210699709845876,-0.484854887261846  
"Plppr2",827.720000093614,0.0102323481228642,0.2096845817478,0.0487987  
62586995,0.961079668313953,0.976454138543351,0.000243811222770667  
"Apoc1",848.022322719608,-3.26182829193156,0.861753290229763,-3.785106  
86168879,0.000153642543511955,0.00138453178418425,-21.4706365590628  
"Btaf1",1655.51240086583,-0.0829151930419047,0.149846207362437,-0.5533  
35279560031,0.580033847485999,0.704597841771977,-0.0290309370220362  
"Slc26a7",145.280968041828,0.829142936844208,0.484969440036485,1.70968  
079304508,0.0873249163566614,0.177805056299309,1.43198583415021  
"Rundc3b",39.8725719698931,-0.154041757851657,0.308274917360876,-0.499  
689560118611,0.617293684650686,0.736020317180965,-0.0472134222678664  
"Cyp2b13",0.408423246610825,-2.46357711921313,4.73888281984416,-0.5198  
64536193394,0.603157994663821,NA,NA  
"Abcb1a",248.506511300306,-1.39593732106043,0.426906414879759,-3.26989  
071235579,0.00107589042400188,0.00622646311848861,-7.08989142488607  
"Ofd1",693.287930955043,0.217732218880463,0.11091722364408,1.963015406  
68868,0.0496443838644302,0.115702390220973,0.469590476353454  
"1110051M20Rik",838.391664482553,0.857574342972155,0.20537941569881,4.  
17556131442983,2.97252173259641e-05,0.000387605096854007,6.73669542844  
643  
"Cd79b",268.01114322547,-1.15608167012478,0.601479120257865,-1.9220645  
0928694,NA,NA,NA  
"Ranbp17",111.396211054219,0.0063393102600975,0.259466508497255,0.0244  
320945189138,0.980507948237357,0.987395102506559,8.04142340682035e-05  
"Pogk",1260.92008556793,-0.295918830595486,0.135499637731318,-2.183908  
64765457,0.0289689614525633,0.0765569002984655,-0.76042883915855  
"Mis12",822.877996026188,-0.43571779405652,0.139485806927656,-3.123742  
86426507,0.00178566431901193,0.00916957674271652,-2.04432869767595  
"Eps8l3",156.045476556507,-0.436296079663081,0.599446655526423,-0.7278  
31368547604,0.466716819812234,0.605337893480938,-0.219006877859002  
"Bace2",869.405920310085,-2.73463866923114,0.570468562058525,-4.793671  
11723606,1.6375665383299e-06,4.02131893757638e-05,-27.6781408105682  
"Kazn",2415.87456368246,0.664136568927702,0.263531381259677,2.52014225  
309008,0.0117307415339522,0.0383897278329977,2.16506220869686  
"Tlx3",0.984520979584968,-0.169177213301652,2.97354746871589,-0.056894

0684759643,0.954629579331795,NA,NA  
"Ildr2",3076.03497274271,0.631600084884117,0.396603171977661,1.5925240  
3790581,0.111267006375975,0.213721218630554,0.974611246356254  
"Apobec1",1171.50397021471,-1.44386952209167,0.330118811798756,-4.3737  
8746828844,1.2210926457412e-05,0.000198407203388849,-12.3092606485608  
"Tmem51",2086.33394930636,0.260441343614752,0.23085388053234,1.1281653  
2697733,0.25925010416114,0.400479997697188,0.238327648604171  
"Pck2",2055.74338453114,-0.341270996046314,0.15661281258561,-2.1790745  
6236866,0.0293261296099571,0.0772599479982359,-0.873851548779779  
"Dhx33",1386.53328775947,-0.147879972333629,0.121899070746618,-1.21313  
453357667,0.22507838872834,0.361051289463199,-0.150650541275265  
"Gemin8",454.786731895311,0.223790776690179,0.198825158375853,1.125565  
69057087,0.260349397305794,0.401796149174321,0.20405475997872  
"Plekkg1",1147.83579393775,-0.306498715716038,0.220575913840221,-1.389  
53846038719,0.164669074174179,0.287312537650841,-0.382260500955371  
"Aicda",4.08540521463381,-5.11201992927835,2.17031118924984,-2.3554317  
7153563,0.0185011942683449,0.0541158544620746,-14.9098608590568  
"Mael",0.288091404901093,0.4.78471990595691,0,1,NA,NA  
"Dok4",1370.46605324335,-0.398335701545309,0.101222391235099,-3.935252  
82978284,8.31091583598107e-05,0.00085648116791733,-2.81331688661782  
"Nrl",1.26264602299066,-0.244447814951344,1.70551306859381,-0.14332802  
2196213,0.886031125789158,NA,NA  
"Erc2",647.224876364764,1.48719966624177,0.492019679797793,3.022642644  
80838,0.00250577954923812,0.0118500338712212,6.59636191497248  
"Ppip5k2",1186.14360208437,-0.116499209629366,0.152663319776839,-0.763  
111989177643,0.445396610515953,0.586502540139127,-0.0621614478819971  
"Rimklb",137.29185811868,-0.0591263000361157,0.557389721269669,-0.1060  
77126613374,0.915521159055282,0.948362433280434,-0.00313478987903658  
"Cyp2b23",6.10942057204285,1.07563270810741,0.848502824038461,1.267683  
12094463,0.204911134892103,0.337559759050881,1.16815080357873  
"Tasor",3792.25142644519,0.19596932444016,0.105408268716235,1.85914565  
172986,0.0630064959028252,0.138531873828742,0.387363714407389  
"Oaz2",6184.7039435243,0.319732580654931,0.131396295441911,2.433345472  
78985,0.014960019494883,0.0460952054537339,0.983831966303197  
"Ppp1r14c",41.5399455265174,-1.44286571785249,0.544261978839722,-2.651  
04999788603,0.00802419619960319,0.0285663086450813,-5.13014841394276  
"Dnph1",713.630956709077,1.51872367527008,0.469340354371097,3.23586851  
444966,0.00121273232546632,0.00681240417226804,7.57692788495496  
"Efhd2",3936.57543737184,-0.964651306465104,0.277263358278401,-3.47918  
784672764,0.00050293591321341,0.00347739164391314,-5.46134712709746  
"Cyp2b9",0.224107459120455,-0.125552415141115,4.77999154655247,-0.0262  
66242088162,0.979044980527276,NA,NA  
"Rad54l2",1868.41291534958,0.432191977258469,0.203892413148662,2.11970  
602821474,0.0340308443132124,0.0866457825044417,1.05710999903476  
"Clcf1",2377.2471923374,-0.452037796927863,0.34845466696974,-1.2972642  
9225044,0.19454026604833,0.325010840498275,-0.508043807150953  
"Sh3bgr",162.167332691524,-1.17827966172602,0.569332251511088,-2.06958  
179270312,0.0384915245457991,0.0952058538112383,-2.77097659901975  
"Nup88",2347.85546337036,0.314412112850694,0.124383404190433,2.5277657  
8111116,0.0114790902719146,0.0377499244597388,1.03025674633703

"Phc1",1519.7513242171,0.344389473550118,0.131859842304454,2.61178435778006,0.00900710477561172,0.0311959368747572,1.19415927967737  
"Mthfd1l",239.863332616115,-0.310179105988831,0.296728462914023,-1.04532980403267,0.295870567418685,0.440218027277462,-0.254497352865547  
"Kremen2",19.1527252594641,-0.829564692385475,0.467814498709458,-1.77327700332923,0.0761828177486018,0.1600487641916,-1.51999208519386  
"Hmgn1",5683.34627395076,-0.566232036596058,0.213432995474243,-2.6529732918657,0.00797861837460245,0.0284400550398535,-2.01576155437725  
"Madd",1750.98324287853,-0.236460929121451,0.135260316203181,-1.74819145599403,0.0804308805816401,0.16695122597986,-0.423277730155887  
"Tb13",1625.56593144693,0.196003694177536,0.208110093931576,0.941826945895185,0.346281247050621,0.490967986837769,0.139432393184859  
"Col16a1",3112.11765359173,-0.567705040171209,0.276288861835392,-2.05475181445945,0.0399029824970569,0.0977177031810619,-1.32029602101501  
"Slco4c1",765.752370397561,2.291420588607,0.790035607833265,2.90040166023833,0.00372684759358504,0.0159250656102829,9.4861626321632  
"Apobec2",107.561167324474,2.36170689081942,0.510229467937563,4.62871519429455,3.67941385925996e-06,7.84914785862699e-05,22.3240827818265  
"Dnajc16",1444.49453319619,0.0251189805636093,0.104820440963431,0.239638188245866,0.810610757271624,0.879302747617215,0.0032309544416994  
"Limd2",1745.60254440357,-0.638913274184671,0.295359625318921,-2.16317065507783,0.030528056385275,0.0797048799410943,-1.61608286749526  
"Ap1g2",1508.75188171138,0.30834648319655,0.183469873745016,1.68063822633402,0.09283320607196,0.186469748840123,0.517863681128078  
"Cyp2s1",1060.50520512899,-0.00321651159537294,0.200305531601312,-0.0160580268036486,0.987188098952057,0.991714851531105,-2.67602863066844e-05  
"Agmat",95.0955734522573,1.88221682295138,0.620686972742198,3.03247354239729,0.00242558359670132,0.0115605057366127,8.39498944209886  
"St8sia4",499.087476563937,-1.06135901783691,0.22803647800863,-4.65433875801547,3.25022064981768e-06,7.06271832231083e-05,-10.1445708056585  
"Sh3pxd2b",1268.39100785733,-1.27844369247174,0.244770699429416,-5.2230258582907,1.76022798259514e-07,7.00427044992656e-06,-15.1738360799129  
"Camta2",3099.79288924432,-0.255282700912773,0.153718389843742,-1.66071672473458,0.0967703528086223,0.192454950944769,-0.420678620199806  
"Creg1",2550.40318056556,-0.323325492334868,0.238976405781771,-1.35295989274407,0.176068443741364,0.302385494236688,-0.38671429724759  
"Klc3",345.74316945122,0.223677354668896,0.318508210087864,0.702265585578444,0.482513550978692,0.620092882743378,0.106892276601198  
"Rsc1a1",29.6426653262424,-1.68661827880034,2.906127606917,-0.580366214747745,0.561667683492419,0.68972140652067,-0.626523911892676  
"Il17rd",619.951197136468,-0.568547920875669,0.234953660412786,-2.41983002042529,0.0155277635647305,0.0473506934602932,-1.73416998028444  
"Virma",1717.03463532263,-0.356727830999078,0.100031916408879,-3.56614012612691,0.00036227771458848,0.00267970063696745,-2.11256012053166  
"Zfhx2",1012.3611593658,-0.0713643036841202,0.24833123804662,-0.287375459670211,0.773824849428632,0.853786279311295,-0.0112808676972617  
"Scamp5",2788.57536245068,-0.357477474012857,0.284612331288381,-1.25601541013571,0.209110383007275,0.342708740170907,-0.382813456397864  
"Rcsd1",1868.61175622882,-0.678407859024366,0.196851454160244,-3.44629

335819952,0.000568333034755728,0.00381064563674938,-3.77870236289202  
"Kcna2",171.050362147947,-0.890913904091347,0.394650132183914,-2.25747  
777952388,0.0239782364215558,0.0661658157015984,-2.41935807242504  
"Hnrnpul1",5073.50494490409,-0.305483217667312,0.125090910582757,-2.44  
208964699486,0.0146025200194562,0.0453520126376802,-0.944951458167089  
"Hesx1",54.2673616586612,0.946118782446751,0.301381184533127,3.1392762  
0900553,0.0016936572458395,0.00884148031576402,4.47353434714431  
"Esrp1",1042.062660165,-0.0663011080796786,0.217701056785731,-0.304551  
154039341,0.760708027028133,0.845188726921585,-0.0111515368253286  
"Cep126",363.70958972107,0.698715899309164,0.302954331697593,2.3063406  
7977816,0.0210916037792422,0.059939380627848,1.96648108458748  
"Eif4h",9735.25115663145,-0.310952423280142,0.196399344836834,-1.58326  
609255483,0.113360827846599,0.21690965862149,-0.475220606923553  
"Erg",811.346044562622,-0.959317301362287,0.278485624343493,-3.4447641  
7274249,0.000571557818723838,0.00382175389213903,-5.34056337995638  
"Ppp1r13l",657.151428398513,-0.848470172683087,0.284224480391846,-2.98  
521144805452,0.00283382359982532,0.0129405701951478,-3.68862898458222  
"Ints8",1202.86784899862,0.315933681656888,0.215578886012213,1.4655131  
0056862,0.142780980778814,0.258167225786098,0.427820881658001  
"Slc25a34",797.390763094671,2.08715204203384,0.434044369411405,4.80861  
448534436,1.51979980146058e-06,3.8285602750489e-05,21.2272476010227  
"Rnf167",3972.2699069303,0.35367276550388,0.0921516821229038,3.8379415  
0422759,0.000124070027057922,0.00117604151073182,2.3857354073007  
"Cd53",1615.64212590124,-1.33603083610684,0.378921900119403,-3.5258738  
9561236,0.000422087899288529,0.00302072628954978,-7.75199558471025  
"Siah1b",163.508090350541,0.116644810365456,0.253411019627285,0.460298  
887305754,0.645301699746963,0.758044543758034,0.0323121440425609  
"Lat2",865.27505263323,-1.09236869654436,0.355314030260507,-3.07437535  
113225,0.00210943849961083,0.0104020819082984,-4.98748162183425  
"Myh6",93.4578483181364,1.76254418891691,0.678196681878352,2.598868788  
38057,0.00935315170185197,0.0321352866753673,6.0592754335749  
"Cmtm5",8.41817284485573,-0.978610777493744,0.60787349254884,-1.609892  
17244922,0.107421398121719,0.207932336004892,-1.53694987560494  
"Appl1",2173.32561536946,-0.129958277006043,0.12676131023467,-1.025220  
36704619,0.305259220228512,0.449916416661541,-0.103796825166677  
"Spen",2466.27157441699,0.0288031043881157,0.2033181881049,0.141665163  
636295,0.887344492751841,0.930103815375971,0.00208704614637283  
"Snrrnp25",276.594758678845,0.0592633694016944,0.2139540330051,0.276991  
130147482,0.78178691690413,0.858947133837245,0.00901087102663588  
"Il25",0.795866050360339,-1.50968635898515,2.544987586324,-0.593199891  
071277,0.553047385527147,NA,NA  
"Oard1",2286.73082056828,0.868755294009584,0.183492362605058,4.7345583  
30798,2.19532629812846e-06,5.15095934547639e-05,8.5778660572405  
"Cept1",2403.18002915812,-0.166103915332139,0.14344540096628,-1.157959  
15528296,0.246880705032074,0.386144712555381,-0.15805503066079  
"Cop1",2723.13061256205,-0.469584127816134,0.223104537077767,-2.104771  
75393547,0.0353111810348108,0.0890221628932947,-1.13586292120381  
"Ttc3",4871.77705340113,0.0457477175139599,0.246996306855791,0.1852162  
00583394,0.853059462703465,0.906427978408292,0.004494425132453  
"Clqtnf4",161.910650748985,1.12701845208417,0.266913882957325,4.222404

76814899,2.41709535590279e-05,0.000332828568145428,9.02503191543624  
"Iqcc",871.01168580182,0.753389709777171,0.207314205985468,3.634047682  
33769,0.000279009263822036,0.00218246903950941,4.61624360559163  
"Iqsec3",100.820484343777,-1.76118858362057,0.403540248763521,-4.36434  
429779182,1.27504626404672e-05,0.000204784613314521,-14.9587464608893  
"S100g",12630.8719391019,2.51549264501453,0.806455264338993,3.11919675  
678023,0.00181344819732371,0.0092610301077574,11.7773856187346  
"Chil3",28.4777894773133,-1.66448615173728,0.56560204920737,-2.9428573  
571646,0.00325198219313598,0.0143552521625006,-7.06347901324192  
"Em12",2448.81845192779,-0.34004352272171,0.119780755758727,-2.8388827  
6182407,0.00452717868967148,0.0183964622136746,-1.35867684656097  
"Agbl2",160.7250168864,-0.108923366787094,0.233166588762746,-0.4671482  
62386456,0.640393806601834,0.754023777888321,-0.0307524840029139  
"Tex264",3933.55258168567,0.737621654381312,0.184276316601654,4.002802  
24819021,6.25966216196333e-05,0.000688386310400231,5.3707415652648  
"Dennd6a",1713.85218429488,-0.307494969772695,0.153129981251376,-2.008  
06509123721,0.0446363752291838,0.106565451722618,-0.688479980416352  
"Hlcs",850.701781879539,-0.0495519065472328,0.153610711080529,-0.32258  
1063512268,0.747012536798825,0.835498792089915,-0.00890578462136615  
"1700123020Rik",1352.11887433675,0.147232857341681,0.183119600452597,0  
.804025658519251,0.4213821566641,0.564448288721945,0.0842034288695055  
"Snrpd2",3347.82915960213,0.329437914341891,0.192617518289095,1.710321  
66372036,0.0872064079071803,0.177619402629709,0.569305680679322  
"Catsperd",147.142450093708,-1.19496420217322,0.457924695526048,-2.609  
5212026084,0.00906690271077802,0.0313466397568219,-4.13774064663319  
"Zmynd15",1884.36813433989,-0.807028464438428,0.479092480142547,-1.684  
4941172909,0.0920862154005977,0.185363309699367,-1.36019607263482  
"Gpr161",259.323023119919,-0.836481264021867,0.235744612421973,-3.5482  
5187913351,0.000387797179727554,0.00282453097135893,-4.90965396850574  
"Gm11639",8.53045833515966,5.90727284604476,1.76430940602785,3.3482068  
5411656,0.000813362779410437,0.00502024294806733,31.2747384686579  
"Six5",1254.53815643763,-0.424986383028489,0.156693715480974,-2.712210  
77197631,0.00668360797025625,0.0248744012605567,-1.56986402816584  
"Szrd1",5408.05243516629,0.0475528076229489,0.175123758884535,0.271538  
299119665,0.785977047338037,0.861583205093441,0.00708459065841983  
"Tiprl",2104.9759716958,-0.0205543354934437,0.183537138718768,-0.11199  
006172227,0.910831286595416,0.945169934243248,-0.00115907014068949  
"Sft2d2",3888.85648099852,-0.179437463021046,0.117049641619043,-1.5330  
0309628502,0.125275092015278,0.233966833727385,-0.260646536113945  
"Psme4",4544.74579653658,0.323566368063389,0.14945770199877,2.16493605  
706617,0.0303925824366784,0.0794256228857198,0.819572337892605  
"Plekhh2",747.90488173463,-0.632078514081317,0.305187123120925,-2.0711  
1790175651,0.0383477792958948,0.0949225594403144,-1.48835141105873  
"Reps2",1494.27114151859,0.718019491072734,0.355976116233479,2.0170440  
0472136,0.0436909213090406,0.104963723962996,1.61851679636825  
"Dlk1",30.395457589667,-0.824511719235408,0.747432655882007,-1.1031250  
9461129,0.269972844445566,0.41230755236153,-0.730505610699793  
"Erf",2352.21066879919,0.0558983725545956,0.175519606582047,0.31847366  
5951763,0.750125667112961,0.837491425639516,0.0099132551457229  
"Bsdcl",3519.0136511052,0.275159178069216,0.111272474744024,2.47284136

262993,0.01340436293008,0.0424489635229331,0.869352430903302  
"Crocc",3104.36271858065,1.1283544781817,0.375001026853517,3.008937035  
85099,0.00262163441660793,0.012249915808011,4.96728294701759  
"Ino80d",2567.36798424246,-0.198721008723156,0.130780032476228,-1.5195  
0573004543,0.12863524681747,0.238347433474012,-0.284971066482899  
"Rsph6a",0.173370006019489,-0.82915207660533,4.78406116662305,-0.17331  
5525811015,0.86240342053458,NA,NA  
"Begain",101.337881922016,-0.870350641579846,0.381680187908875,-2.2803  
1390978994,0.0225890774093094,0.0632546074000739,-2.40267893618469  
"Osbpl10",331.026709014063,1.1197264957327,0.369270986851624,3.0322623  
1034127,0.00242728174490071,0.0115657721070562,4.99365010150277  
"Wdr25",247.964308098379,-0.163492805777133,0.19380332543239,-0.843601  
653441022,0.398892040035639,0.543242089586847,-0.0997633462543197  
"Tmem205",5655.54459892593,1.21741618033813,0.301898533610733,4.032534  
26168629,5.51785672445393e-05,0.000622703205501692,8.98628515776855  
"Gfer",1208.31764326477,0.146068279505872,0.18698358982371,0.781182346  
769504,0.43469525494153,0.576812854284059,0.0803722314692932  
"Foa3",12.5376553867652,-0.832188165083141,0.74132084374599,-1.122574  
89062089,0.261618084461196,0.403259645593983,-0.755772189421128  
"Kcnd3",306.341126527451,-0.773067322690784,0.247527262923732,-3.12316  
03079172,0.00178920266640893,0.00918183079951073,-3.62609443375961  
"Ccr6",10.4033866611488,-1.28210614287844,0.801854787936783,-1.5989255  
9371924,0.109837136419678,0.211589568760367,-1.99124786778797  
"Gm21988",638.310068192232,0.717151224582017,0.216765830741198,3.30841  
453253877,0.000938258181131214,0.00559454373568698,3.71912006686357  
"Atp1a3",657.41876114664,-3.43122403294122,0.825815065454193,-4.154954  
51279285,3.25352261758799e-05,0.000414893289717009,-26.7206201130695  
"Fbxw4",1390.98695760589,-0.320602928264334,0.18735681289724,-1.711189  
05849544,0.0870462178507959,0.17733490912987,-0.554551755707436  
"Slc19a2",547.624102603265,0.659356785943506,0.179242045417821,3.67858  
324985367,0.000234533138655148,0.00191736986897194,4.12546412641695  
"4930505A04Rik",5.22610357781631,0.0613196719464742,0.70315998010998,0  
.0872058616545318,0.930507880183106,0.956679177759194,0.00271567542169  
988  
"S100pbp",1904.53600245035,-0.127039516885246,0.120061686804063,-1.058  
11870769874,0.290001326505168,0.433756203144965,-0.106112633494646  
"Rfx3",422.216628307644,0.404065075006592,0.189364182620691,2.13379884  
94686,0.0328592501311346,0.0843234613130906,0.999291375385415  
"Ulk4",182.001263871866,0.00645977235359067,0.429571413682501,0.015037  
7146798812,0.988002091815756,0.992123643519782,5.10809006500055e-05  
"Slc16a11",1278.3960206458,0.824953410956399,0.30536311320237,2.701548  
9929515,0.0069017311259721,0.0254956481392192,3.02695824290415  
"Arhgef1",7498.10947005396,-0.290915234978795,0.194342914944585,-1.496  
91711201176,0.134414827039097,0.246410332607025,-0.407501584944324  
"Tet2",3609.55542234554,0.835432613484914,0.235624559311771,3.54560923  
498427,0.000391706600001282,0.00284981167418843,4.89605480805968  
"Rcc2",3489.8400071848,-0.656681207960163,0.127890356413957,-5.1347202  
898912,2.82563950159453e-07,1.01650035059207e-05,-7.54957475451181  
"Mgl2",1817.76471677144,-1.86194359145895,0.380496737056582,-4.8934548  
1872572,9.90810687126315e-07,2.75589540336503e-05,-19.5488866231963

"Rps19",14168.5589792466,-0.331104762070303,0.209805180466719,-1.57815  
34151528,0.114530369399688,0.218504221385041,-0.503593769591565  
"Cables1",880.737616816393,-0.575963259772471,0.363145971788007,-1.586  
03785947735,0.11273072159246,0.215915875207248,-0.882874736483902  
"Asgr2",144.895338809575,-1.80869882040131,0.440308947767709,-4.107794  
83263081,3.99454695190141e-05,0.000487089909119285,-13.7950577415724  
"Arhgef10l",3096.95658431186,0.126394282879108,0.230057664758623,0.549  
402616129836,0.582729179126441,0.706947084034803,0.0438334692599911  
"Slc22a2",7950.85559955933,2.29899496107567,0.835590386476324,2.751342  
04304397,0.00593516355758834,0.0226465399306962,8.70801402829976  
"Arhgef38",467.88255233618,0.866858760157646,0.474442657847712,1.82710  
965344076,0.0676832840988691,0.146248701565115,1.66648973777619  
"Igsf21",25.8924876017221,-3.86402577217798,1.03193993977702,-3.744428  
93741754,0.000180804540087904,0.00156403146523246,-24.963494136832  
"Gm11992",821.92176420662,1.61717431957744,0.61387168410639,2.63438493  
979658,0.00842898666228376,0.0296283363874542,5.69087534820756  
"Sun3",75.4850451816136,2.22063350033153,0.684297146935995,3.245130438  
25278,0.00117396835426734,0.00664249418790033,11.1348509570902  
"Mill2",1358.01912319561,-0.825568434987806,0.187374269380847,-4.40598  
614588752,1.05303693819144e-05,0.000178230158167158,-7.1266657040656  
"Sh3kbp1",1320.29464865183,-1.57520631986895,0.276555118017364,-5.6958  
1330174498,1.22785182827552e-08,9.32213774251015e-07,-21.8728481879144  
"Abhd4",2821.61393289897,-0.4000184327075,0.17871216735281,-2.23833910  
490153,0.0251989498419153,0.0689004521129805,-1.07008632484313  
"Npnt",9175.72709941214,0.184403548613531,0.410353359411704,0.44937745  
5756418,0.653159391399823,0.76373624069048,0.0497028018596264  
"Trim62",463.79351290569,-1.18079981583148,0.295286816908117,-3.998823  
3413038,6.36581709209398e-05,0.000696915786982866,-8.58305199050334  
"Iqcf4",0.148177164577155,2.59891947282788,4.7275994170606,0.549733436  
265582,0.582502219767124,NA,NA  
"Cmtm8",444.475313234474,0.796351339294752,0.25641681978258,3.10569072  
641175,0.00189835151842694,0.00959020717421911,3.7006548567819  
"Nrg3",0.132636770796333,-0.978450109585277,4.78042127650866,-0.204678  
636670256,0.837823212509415,NA,NA  
"Map7d2",41.9103285204028,-0.524452539185429,0.535383808089827,-0.9795  
82369247589,0.327292311308081,0.472048788280162,-0.393692326196687  
"Iffo2",940.043492316885,-1.2481825614851,0.209935165195117,-5.9455620  
9925582,2.7550977455573e-09,3.14145589724422e-07,-18.6895483704358  
"Ghitm",18768.5270291239,-0.273809970048634,0.468397224093486,-0.58456  
7875222902,0.558838313610005,0.687589413691417,-0.102559193778769  
"Gm17018",1349.87412663023,0.153177791286914,0.243404079736498,0.62931  
480627909,0.529142979892754,0.661588676543914,0.0632794689348191  
"Irgq",1075.76314290662,-0.165635813958261,0.149418228333636,-1.108538  
20049594,0.267629450853276,0.409755715173708,-0.147779298198764  
"Fam117b",2196.51117783253,0.0760872766084365,0.215828334493142,0.3525  
360874749,0.724436259456861,0.818464375181937,0.0152422147025183  
"Lrit1",1.97939554397695,3.974868504116,1.29412608674049,3.07146926782  
65,0.00213008090282799,0.0104875346425084,18.1157331168816  
"Ramp3",1150.17026484993,0.164354698248241,0.434238799946823,0.3784892  
05175512,0.705067211426985,0.804176688412013,0.0358188502614757

"Slc7a13",17724.5692094853,2.5045196496613,0.981140002431916,2.5526628  
6508902,0.010690291669371,0.0357344945944448,8.34415489417828  
"Wdr43",1764.51502226373,-0.00645843358429561,0.149751585603466,-0.043  
1276474186871,0.965599780344835,0.979228745789391,-0.00013556259360725  
3  
"Wwp1",5287.73066705915,0.800080299793461,0.192142072898497,4.16400368  
604392,3.12715061711934e-05,0.000403528674603527,6.25283797047459  
"Mslnl",5.91345528805336,-0.768117266241849,0.660054660066936,-1.16371  
766266138,0.24453844912663,0.383650682416401,-0.735873870734485  
"Pif1",58.8395832887657,-1.45070039551013,0.575572689297846,-2.5204468  
9139069,0.0117205923685487,0.0383629528289343,-4.7302451837437  
"Nacad",111.06470996922,0.265704905104743,0.565671875417037,0.46971560  
1308363,0.638558219973065,0.752681989672797,0.0754900755141847  
"Fzd7",1176.72060508345,-0.203428990606904,0.184637248917668,-1.101776  
54725356,0.270558828757737,0.413008380421072,-0.179889692100166  
"Grid1",76.0833905175969,0.960239826812061,0.629002618663349,1.5266070  
4156145,0.126858754999658,0.235907678109998,1.3868885405454  
"Rwdd2b",763.353349575511,1.23392612097747,0.257324892304609,4.7952069  
8493796,1.62506947155867e-06,4.00070764601654e-05,12.495296360125  
"Ostc",1862.63478148206,-0.493605479749159,0.229025006555764,-2.155247  
09363549,0.0311425034653603,0.0809082654986803,-1.24114101243945  
"Tspyl2",2876.10066327411,-0.266277743935025,0.240740159595095,-1.1060  
7945256364,0.268692131401827,0.410930988946021,-0.236808783002504  
"Elmo1",567.365602268869,-1.10250826248898,0.241886494896425,-4.557957  
08214744,5.16535888286138e-06,0.000102040696553223,-10.1322040027985  
"Iqsec2",2194.83419525766,1.38832431572743,0.27706731957837,5.01078336  
427453,5.42089122285319e-07,1.67820983167894e-05,15.2649004842787  
"Ccdc8",180.668624920947,-1.47234050634739,0.235444909019464,-6.253439  
5518642,4.01510013546435e-10,7.60062353798873e-08,-24.1352688040038  
"Pde9a",1115.51368814826,1.52519511412524,0.399704629382744,3.81580547  
736103,0.000135739410233853,0.00126211112100127,10.1806308183587  
"Nbl1",2534.22665460819,-1.68371207099024,0.300895647925525,-5.5956677  
4261546,2.19774238872724e-08,1.46251130018443e-06,-22.6212702860084  
"Msantd4",2057.87013950033,-0.0398268634303911,0.183705851231036,-0.21  
6796923796963,0.828366609405016,0.890625428738848,-0.0046131987255248  
"H2az2",2583.00311583074,0.494677236639571,0.243918575910634,2.0280424  
9242915,0.0425559113661442,0.102781513664942,1.12546480131026  
"Zfp598",3788.17408964413,-0.0233487896820511,0.12347727721234,-0.1890  
93817171713,0.850019287253201,0.904369055346608,-0.00234696791696113  
"N4bp2l1",794.551540473752,-0.770845509453116,0.223496627672764,-3.449  
02523800834,0.00056261411496028,0.00378140296914703,-4.29951430482221  
"Smc1a",3418.48544879241,-0.0510960290710694,0.11830838816717,-0.43188  
8472682687,0.665822473221371,0.773579226723292,-0.0131177398583045  
"Cyyr1",1242.12745824712,-1.15273796408222,0.342060697542188,-3.369980  
74425096,0.000751734365308602,0.00471646757847466,-6.17486586598787  
"Ripk2",468.284650212478,-0.702905221318362,0.168858679623389,-4.16268  
33923259,3.14529343569266e-05,0.000404545737646677,-5.49161978458597  
"Pnmal1",1.49523501082598,-0.0709785959133749,1.79875283573764,-0.0394  
598938237491,0.968523728687993,0.980644735003297,-0.0013872788413974  
"Tmco4",998.03733347505,-0.310107856613525,0.197685694477475,-1.568691



43937403,0.116719854280957,0.221856474826487,-0.466937033311171  
"Dnah7b",501.42525026382,1.46547429855828,0.422046102809484,3.47230856  
72463,0.000516002873080419,0.00354761072613611,8.26744531894439  
"Brca2",278.081407959561,0.504693273073502,0.259274701945281,1.9465581  
0723877,0.0515877351817612,0.119149213524518,1.07367370714634  
"Osgin2",452.698699539809,-0.533563750853764,0.208338347191181,-2.5610  
4436867852,0.0104358027617324,0.0350762424148005,-1.78756194235135  
"Otud3",256.22983133028,0.358508167647059,0.148254759606801,2.41818993  
60121,0.0155979326297525,0.0475275027996427,1.09217603471727  
"Zmiz2",4476.4127317385,0.0495415573479746,0.154574144141229,0.3205035  
20321679,0.748586662173851,0.836443709975114,0.00884792660868483  
"Spem1",14.3708147793902,-0.439723949374799,0.581438385859465,-0.75626  
9211095881,0.44948780394672,0.590295224715643,-0.23179277874473  
"Lonp1",6676.45071227367,0.135761718459457,0.285314584405194,0.4758316  
81519135,0.634194297153937,0.749016924459838,0.0392342812878501  
"Hectd2",208.896458306805,-0.423628679157926,0.154689147850226,-2.7385  
8046957563,0.00617050577582298,0.0233661918075347,-1.59134634687487  
"Prkd2",1371.13124466679,-0.603206222844602,0.166980993484834,-3.61242  
444577615,0.000303347506777429,0.00232494877639399,-3.65787708206237  
"Chrnb1",1256.84962001422,-0.405116008321999,0.295592793983217,-1.3705  
2058293748,0.170524454733822,0.2950790714665,-0.494448917013757  
"Pla2g5",299.621368210089,-0.368048549578016,0.583661971044599,-0.6305  
8511233704,0.528311835720646,0.660745617247028,-0.152514298217115  
"Rpusd1",329.695610565062,-0.228317995337519,0.132894615880856,-1.7180  
3796432365,0.085789690810012,0.175356682190336,-0.397486377188606  
"Pla2g2d",131.745102391682,-1.67924540603566,0.547694481583991,-3.0660  
2579083707,0.00216924602570877,0.0106404928325206,-7.62896045471182  
"Trir",5615.04523558209,0.423492494304972,0.166107640205198,2.54950641  
512827,0.0107875526374396,0.0359809069545836,1.40801380357464  
"Map6d1",6.66818828552818,-2.57172279794317,0.99666603706698,-2.580325  
50754044,0.00987072258342856,0.0334130814117518,-8.74079149645478  
"Yeats2",1820.94971047009,-0.0114361516492809,0.180376441388303,-0.063  
401581499559,0.949446727932371,0.968673135954443,-0.000363990349243998  
"Clvs1",5.14565242506682,-2.52397308640189,0.896558671896948,-2.815178  
93420366,0.00487500819782092,0.0194980327879205,-9.93799688303507  
"Arhgap11a",487.415924137944,-0.677974254515064,0.29921416530268,-2.26  
584945879563,0.0234606019838645,0.0650782212948342,-1.85233775150436  
"Elavl6",8692.09368628612,-3.13002578973961,0.803037357031656,-3.89773  
372599927,9.70970936151867e-05,0.000967196566763314,-21.7258495794795  
"Arhgap12",2228.02901220515,-0.221223648569527,0.110347360854604,-2.00  
479328962852,0.0449851502279653,0.107141676447874,-0.494125858516497  
"Phf8",876.137664032541,-0.365423764754766,0.195318298144255,-1.870914  
13465459,0.0613569835222842,0.135870353744179,-0.72940561454673  
"Ublcp1",1971.81858094563,0.367971197683602,0.100822201234663,3.649704  
06495242,0.000262542601022513,0.0020860047411316,2.27130392861068  
"Chd7",1922.74603635687,-0.351004491899766,0.249375721263795,-1.407532  
73863603,0.159269476401667,0.280395360342963,-0.446321401050173  
"Vps41",2888.81444005106,0.00677732712250693,0.132114751679598,0.05129  
87916666806,0.959087430948913,0.975090558381579,0.000170957615170221  
"Pklr",1533.51250795775,0.323897572372625,0.570596407696739,0.56764740

8927906,0.570274408620115,0.697122074563815,0.11686054064114  
"Rbbp8",1570.11315479478,0.162703675809663,0.193453677558029,0.8410472  
10182178,0.400321487014593,0.544428287215633,0.0989269342675773  
"Mul1",1808.63583988977,0.296241445389269,0.241352766977686,1.22742096  
185149,0.219664411794898,0.355437560372348,0.306433834965257  
"Wnk3",26.4109311906703,-0.619615165432212,0.372579956459041,-1.663039  
44882319,0.0963045391836436,0.191665398081319,-1.02360682195885  
"Lamp3",0.949892507590736,-2.28680209506637,2.69506130334092,-0.848515  
798965888,0.396150777577819,NA,NA  
"Kcnj1",5094.79357448731,1.85166153596295,0.59353625278726,3.119710931  
33319,0.00181028597386632,0.00925457680085094,8.67065893188483  
"Zfp236",1742.3255425873,0.49703981871048,0.299020077316742,1.66222891  
509717,0.0964668844653793,0.191968903174726,0.820325393374684  
"Car8",279.803607168484,0.163584743953663,0.309980457246721,0.52772599  
0879036,0.597689531041563,0.719864563965589,0.0537690277847985  
"Rusc1",1039.50571158307,-0.361015514664006,0.126352602270956,-2.85720  
680203982,0.00427387281624682,0.0176363962267049,-1.4577050316411  
"Uspl1",1810.6871634434,0.0727462905330591,0.101252187657946,0.7184663  
58265888,0.472469783802156,0.610371067883783,0.0359139851392207  
"Dmxl2",2066.57669806239,0.911059518713036,0.223774780332602,4.0713234  
8586782,4.67467785052366e-05,0.000549408491437675,6.83902163457816  
"Tox",158.064005441148,-0.680394189306751,0.364033028911204,-1.8690452  
1092979,0.061616524608467,0.136284719907577,-1.35603177882308  
"Ttc1",1589.58097895038,0.220356325476282,0.131841678701507,1.67137075  
048304,0.0946484695944382,0.189351392930196,0.366706148337434  
"Sox15",63.4218511227637,-2.45420698347173,0.913616705721272,-2.686254  
49611739,0.00722580279311907,0.0264133301200292,-8.91830954561939  
"Adgrf1",62.4805318262161,-1.2201760712238,0.751650888670749,-1.623328  
18282382,0.10451926799457,0.203946922211882,-1.93995245000511  
"Cdk13",2154.35572468583,-0.26670512390685,0.139856106533123,-1.906996  
63045235,0.0565210238321513,0.127737380999939,-0.548820158799576  
"Katnal1",903.955724387108,0.274551561245321,0.223048549987933,1.23090  
493643727,0.218358421117748,0.353793625972566,0.285270469681924  
"Cftr",379.752146125789,-0.653054652203843,0.550211160803638,-1.186916  
40360401,0.235260596314335,0.373202466609375,-0.643673000125884  
"Gtf3c3",895.556171664397,-0.0623923063043094,0.137862207891012,-0.452  
570049898186,0.650858369236445,0.762051070880455,-0.016954591593473  
"Sntb2",1546.61192038644,-0.115613455632309,0.170767006313237,-0.67702  
4550165385,0.49839037800577,0.633936694523877,-0.0526973276191229  
"Nkx6-2",10.1461022621978,-0.440391359611394,0.889777362202216,-0.4949  
45565395614,0.620638545562451,0.738734531553426,-0.133357835835047  
"Slc7a1",928.328910650353,-1.00303354073394,0.173256435693708,-5.78930  
033229562,7.06802203927513e-09,6.04439884744678e-07,-14.3624007774852  
"Thoc6",590.524719646365,-0.220840450797182,0.110432099825986,-1.99978  
49460906,0.0455234908277052,0.108114132053422,-0.491274562755604  
"Ak7",82.7003865074854,1.28039450696005,0.291601710721698,4.3909019044  
8865,1.1288146113401e-05,0.000187795454709123,10.9859861404481  
"Inhba",594.890237622257,-1.4530721722808,0.45093444217327,-3.22235792  
25347,0.0012714020307582,0.00707039059601203,-7.19538025699225  
"Pcf11",3742.79788232978,-0.121705768089337,0.107534311522756,-1.13178

544006935,0.257724650450351,0.398660470803725,-0.111926122359275  
"Atp1b2",1239.05712179901,-0.840630537705257,0.211974316975827,-3.9657  
1881772413,7.31750858950698e-05,0.000776698269304374,-6.0193001722206  
"Atg2b",1711.27898349151,0.191742976994975,0.122843965122353,1.5608660  
6944019,0.11855354566222,0.224426437216718,0.286503755827726  
"Ankrd42",270.878145638178,0.573446324415012,0.153348440168615,3.73949  
890709339,0.000184387449786163,0.00159008690664777,3.69526896484925  
"Wrap53",612.170180321046,0.541867538503708,0.179903300718985,3.011993  
31161869,0.00259538315921326,0.0121704619620827,2.38895494143088  
"Bdkrb1",3.11973212917265,-2.4521531337248,1.18080757393371,-2.0766746  
3171477,0.0378315995193594,0.0939669461692319,-5.79888163475825  
"Rap1gap",3669.76118770602,1.047731157905,0.307383627320287,3.40854575  
449879,0.000653101317413469,0.00423907106755254,5.72418606052711  
"Tmem29",496.046028073415,0.218349604500372,0.164534105369094,1.327078  
07910436,0.184482855811146,0.312732283307748,0.253811278886261  
"Rgl2",4542.33120027864,-0.412971449512617,0.148558022459023,-2.779866  
36249502,0.00543812726973758,0.0211768734781992,-1.59194116120753  
"Ssr2",4362.36543278603,-0.0455612631119344,0.195240872438401,-0.23335  
9247697016,0.815482455256696,0.882417276907435,-0.00569926896302839  
"Nutm1",2.21372199736215,0.708632838312437,1.29927597400872,0.54540594  
3377877,0.585474353676897,0.709262438520792,0.243436403592908  
"Pum3",1744.0318325002,0.547891261656621,0.182306061232213,3.005337606  
18493,0.00265286213908398,0.0123394484712482,2.40795686781645  
"Myzap",586.862788847987,-0.92267917610554,0.267475864979655,-3.449579  
18418442,0.000561461038628446,0.00377625640951274,-5.14764754048474  
"Shtn1",1413.65557996154,-0.248058614541147,0.173231756726207,-1.43194  
653930113,0.152159121759096,0.271064281046949,-0.323815538505254  
"B4galnt3",773.942621154975,1.6686009491086,0.585152773358413,2.851564  
62564787,0.00435046418427043,0.0178692544059205,6.71557431213688  
"Ccdc9",4271.08846696334,-0.0836341743837191,0.161099051121876,-0.5191  
47529431737,0.603657865953025,0.724800090992299,-0.0269184450789287  
"Ninj2",0.135959949781025,-0.534897781702922,4.78471990596623,-0.11179  
29141549,0.910987605989865,NA,NA  
"Cldn5",2706.26674635086,-1.35680936714304,0.395688475094968,-3.428983  
7903856,0.000605845710080336,0.00399215263776492,-7.49423435179313  
"Htr2c",0.151288805160611,0.4.78471990595452,0,1,NA,NA  
"Mdfic",1862.28808226711,-0.908850496606135,0.147307946961109,-6.16973  
160888655,6.84060070115914e-10,1.1803365705416e-07,-14.4982521633099  
"Mettl18",233.130264196233,0.11294135856018,0.199702591643197,0.565547  
785989522,0.571701231028001,0.697924876461833,0.0406186603701192  
"BC055324",93.6090396906398,-0.870549118291372,0.305765926251909,-2.84  
710964678961,0.00441181638673684,0.0180376590288519,-3.49551024949394  
"Wapl",3279.4369090434,-0.169286642406764,0.17364311531885,-0.97491134  
0976082,0.329604240057486,0.474359571349341,-0.126252226725681  
"Dicer1",2941.44331900548,0.44553569625676,0.156312378520433,2.8502905  
5583413,0.00436793071812895,0.0179183490726022,1.79191338432706  
"Pik3r1",6174.2524410049,-0.800386307351606,0.182964137377975,-4.37455  
295240801,1.21681584503628e-05,0.000198042365162917,-6.82491772196617  
"Meis3",812.325624959791,-0.986043588420055,0.260519517794722,-3.78491  
25346417,0.000153762647422476,0.0013847871129069,-6.49034484429097

"Paqr6",157.779700452104,-1.37275451524829,0.322311559133634,-4.25909178975219,2.05259176166596e-05,0.000293843128993854,-11.1638773732862  
"Hibch",2417.17338627504,-0.72666938409613,0.55669741763223,-1.30532199554083,0.191783227361243,0.321640234568168,-0.82427680896961  
"Nthl1",415.457337923318,0.0350911390271091,0.168399685587681,0.208380074491517,0.834932213102191,0.894527627400765,0.00391124048234064  
"Ccnb1",126.901783360756,-0.638894832681206,0.496429491507913,-1.2869800114827,0.198101255210788,0.329178308684162,-0.709911637172006  
"Utp4",1030.30472192995,-0.191457685532998,0.193447189727068,-0.989715517724108,0.322313188048854,0.467489588676379,-0.145580250438129  
"Mfsd6",1171.21753207855,-0.136162576076117,0.187707632601284,-0.725397119920765,0.468208439454204,0.606385131350254,-0.0681139622219625  
"Gk5",598.627171077023,1.14044627567474,0.280015183625632,4.07280155635942,4.64509998018352e-05,0.000547582584121029,8.56474841583996  
"Arhgap32",2707.49069359666,0.339263516416278,0.177147963409505,1.91514206478354,0.0554743885567893,0.125801305894426,0.703310759939527  
"Mmrn2",1763.46048702045,-0.543232883226964,0.233461730695252,-2.32686051632193,0.0199726902590672,0.057393110326336,-1.5524677804343  
"Serpina3h",21.460501070073,-1.64970843861189,0.627198745710961,-2.63028019410636,0.00853145199327017,0.0298754042681002,-5.79166397545868  
"Rpl21",27625.0718029587,0.00879763452777654,0.163614731424152,0.0537704303958407,0.957118068550781,0.97379921209576,0.000233578466533086  
"Tardbp",12702.9306822563,0.102261057976141,0.0764568862125716,1.33749964250214,0.181059598892195,0.308835627609135,0.120151230545822  
"Cacna2d4",19.7604926070521,-1.12222242206559,0.816179256409639,-1.37497052669806,0.169140582334434,0.293407746828895,-1.37606016735576  
"Gpr12",8.82642099449181,1.97859336877066,0.732993899916653,2.69933128910846,0.00694789737976703,0.0256135570260347,7.25081953483424  
"Shld2",298.702886890176,0.058825306615305,0.243294402338485,0.241786518924771,0.808945585374275,0.878121647011892,0.00764553361968167  
"Smpx",18.8096347066692,1.15152629104215,0.477395201859383,2.41210277471815,0.0158608099015765,0.0481329294102629,3.49348748749424  
"Dcp1b",860.58166773208,0.0864549577683238,0.150983604743774,0.57261156212982,0.566907729384072,0.694101532654986,0.0315679063804024  
"Syt15",181.13223428368,-1.37282709860206,0.397656074571036,-3.45229756664216,0.000555834376080395,0.00375135294732279,-7.66811619522872  
"Serpina3g",1588.0598818845,-1.25367955193929,0.569433400691941,-2.20162630154097,0.0276917164772184,0.074023888806141,-3.26378849583621  
"Piezo2",854.890906541632,-1.06468084162481,0.365312858089969,-2.91443571735054,0.00356332185529262,0.0154120784238011,-4.44249128694729  
"Zfp281",1484.68502285938,0.288116064120612,0.14709007104195,1.95877302988344,0.050139373424561,0.116660799884498,0.619012955914513  
"Stx3",2540.5421719776,0.811860397447366,0.269469845720705,3.01280610925509,0.0025884423731705,0.0121437558691238,3.58106763266001  
"Cep78",336.80042617217,-0.103957008018832,0.132835474655673,-0.782599740681491,0.433862193828996,0.575955179453161,-0.0573557254458762  
"Kif14",45.3789794093872,-0.524793824653196,0.492504518256269,-1.06556144197671,0.286621937041299,0.430750310500328,-0.441995362058968  
"Rrp9",850.574217729458,0.183685074597958,0.0975018787432795,1.88391318162799,0.059576719918019,0.132833263003034,0.370797822693755

"Irf8",3371.88409815936,-1.0250746806544,0.388551901792717,-2.63819241  
631521,0.00833492738791118,0.0293771536893514,-3.61598988076977  
"Upk2",1838.35590877254,-2.19956820144449,0.660367592200208,-3.3308239  
6444681,0.000865893414610613,0.00527599681189929,-11.5358282210915  
"Rnf123",3007.68471599202,0.447739200254443,0.219607809316523,2.038812  
74371765,0.0414687199560885,0.100629384157289,1.02814843944956  
"Ago1",2481.28010293218,-0.271776550956603,0.142487063780938,-1.907377  
01897231,0.0564717831072783,0.127677043950106,-0.559384438655119  
"Serpina3a",0.157502682527355,-1.19648096621745,4.77621924155054,-0.25  
0507965758505,0.802194545266423,NA,NA  
"H2-  
0b",631.073793801629,-1.28740653050828,0.423925027356311,-3.0368731436  
7077,0.00239046034632937,0.0114406469888881,-5.75545741421191  
"Sox5",396.480136340123,0.108470401446857,0.329731642568188,0.32896570  
2539228,0.742181611928218,0.831970466191134,0.0199540345724891  
"Disp3",2.38576903553268,1.33215089628142,1.10454502005667,1.206063014  
26543,0.227793194380214,0.364237436612871,1.34540489931352  
"Hspb8",1290.64505427774,-1.72266625719336,0.389366840549117,-4.424275  
7158363,9.67663738257065e-06,0.000167070244478723,-14.982194173714  
"Ptchd1",47.0155419159774,-0.425310352480567,0.41498138263397,-1.02489  
020057005,0.305414998939446,0.450005390814202,-0.339608494724925  
"Fbxo2",120.994956409901,-0.0648854225164549,0.311829129816432,-0.2080  
8005510791,0.835166460039931,0.89472943065157,-0.00721745980223653  
"Fmod",764.825685717723,-1.30840258535613,0.376193816183104,-3.4780013  
0962093,0.000505167456780006,0.00349034552526455,-7.40262067175707  
"Nop53",5224.61662592364,-0.30942123191744,0.179226022714562,-1.726430  
27631221,0.0842700328522249,0.17304866777806,-0.542781281508789  
"L3mbtl4",2.20798850960882,-0.676739010640045,1.26140425735566,-0.5364  
96532886867,0.591615431472184,0.714675264254208,-0.22733491599862  
"Tssk1",12.8631644673243,0.679080403134322,0.344826229707269,1.9693409  
1617917,0.0489139556142864,0.114440363309255,1.47204356512547  
"Serpina12",1.77107832059974,-0.462798349196899,1.31335649437313,-0.35  
2378315544703,0.724554562100476,0.818550602690485,-0.0926615134253748  
"Camsap2",1852.18018804691,-0.266178377847341,0.147786041656654,-1.801  
10634849903,0.0716861193117436,0.152791424829512,-0.500064400563459  
"Selenow",6140.5445525747,-1.04424907105597,0.277499858484786,-3.76306  
163454573,0.000167845813975013,0.00148084057958588,-6.80343452470032  
"Pre1p",1786.65433936033,-1.7357743141157,0.34879168140511,-4.97653587  
127744,6.47322847593052e-07,1.9358130187683e-05,-18.8373138025696  
"Crx",3.41786847328508,1.01638797149714,1.03376930818232,0.98318644542  
1043,0.325515684659076,0.470454734228942,0.766412972959459  
"Sdk2",319.344444971116,-1.82559995668599,0.360680929675503,-5.0615372  
3826886,4.15889486606411e-07,1.37208345344362e-05,-20.4405035503865  
"Tmtc4",929.072100115974,0.324350273673806,0.16184066296533,2.00413337  
248432,0.0450557753817807,0.107238465380122,0.72417694550713  
"Nlrp5-  
ps",98.2917195520533,-0.593474111757088,0.368303606334124,-1.611371981  
02451,0.107098670410984,0.207513651562493,-0.93327255174004  
"Cdc42ep4",1837.08456872749,-0.900637625578674,0.161258003188644,-5.58  
507241668548,2.3360285309296e-08,1.53359879784732e-06,-12.057640549477

"Inava",909.695762661369,-0.474959770253726,0.192491391317529,-2.46743  
382653536,0.0136085371865687,0.0429908065560137,-1.49458867518791  
"Mbp",1064.64413021475,-1.08222598182333,0.200972999636857,-5.38493222  
362619,7.24719515661928e-08,3.55039726542117e-06,-13.5802597633437  
"Entpd3",234.520530436583,-3.46125936115326,0.755387509889509,-4.58209  
768607313,4.60334751153887e-06,9.33015278378221e-05,-32.1193587595263  
"Bicdl1",1394.73402235001,1.25849824159616,0.277132382364286,4.5411446  
7194198,5.59496204847127e-06,0.00010818090741651,11.4922355203281  
"Nppa",2.96016599731382,-0.997710155262744,1.49456199732626,-0.6675602  
33063351,0.504414349174075,0.639180540728934,-0.446543466177675  
"Ccfdc74a",27.7152541792741,0.0866009123221336,0.363107440390136,0.2384  
99415569911,0.811493768583971,0.879810136779931,0.0110891730776019  
"D11Wsu47e",400.768432440938,-0.156106976530428,0.154169752686793,-1.0  
1256552475355,0.311267733944315,0.456421067407232,-0.122440868245634  
"Gucy1a2",112.7394144532,0.140111001989618,0.40297246334703,0.34769373  
7745443,0.728070200144386,0.821454818160013,0.0275567995972467  
"Ggact",2384.62976148528,1.31199084240024,0.310365292725673,4.22724728  
94058,2.36567631268335e-05,0.000327425646559507,10.5277419425713  
"Fam104a",1856.77439617472,0.207882027217492,0.137282145748086,1.51426  
848760769,0.12995775753825,0.24002431333384,0.296650782547672  
"Mrps27",1174.79666941186,-0.0139238252612786,0.246456546309692,-0.056  
496065816739,0.954946629544866,0.972249458663558,-0.00039185630305653  
"Kctd12b",859.535574682783,-1.29616485546412,0.361095856629132,-3.5895  
3123296389,0.000331273139942783,0.0025022197651844,-7.76477541670402  
"Gcn1",4924.00792476678,0.174467890345469,0.144019227260103,1.21142081  
973801,0.225734164062655,0.361863846560386,0.177344386485667  
"Kif21b",699.498488606619,-1.29298193662906,0.384028356387459,-3.36689  
183265552,0.000760204998978339,0.00475938325583626,-6.91439828674082  
"Slc5a12",2345.84762826523,2.13757972217668,0.95741304855122,2.2326619  
8994396,0.0255712428198694,0.0696936109172231,5.6937570252139  
"Ddx24",3666.22381671193,-0.0115665829214053,0.264879344467672,-0.0436  
673646435159,0.96516955363232,0.97904389433121,-0.000244966364557766  
"Klf8",83.6090144328371,-0.274763258261831,0.2872593635892,-0.95649887  
554148,0.33882025219936,0.483448026153174,-0.199701086236996  
"Pcca",3544.59132253214,0.940270740013609,0.468740113965632,2.00595321  
799693,0.0448612394958552,0.106945158049906,2.10191799327107  
"Pnp1a3",1496.18914216698,-4.48248459852378,1.28867818396002,-3.478358  
40966083,0.000504494882617897,0.00348693414437567,-25.3651808189962  
"Slc39a11",863.755821408116,0.454901292214778,0.282640701631301,1.6094  
6845089632,0.107513948195017,0.208070169916272,0.714140395498499  
"Rragb",88.4042201420886,-0.90935609169865,0.263533732918063,-3.450625  
01725873,0.000559290064576618,0.00376601658020649,-5.07578694892162  
"Bbox1",29.2563778275864,-0.54716699075195,0.738763081930347,-0.740652  
861702608,0.458903947545328,0.598649428034514,-0.280739954959254  
"Prima1",86.6770018234278,2.47491612663868,0.573033634894837,4.3189718  
2979997,1.56757787373814e-05,0.000239910780079641,20.6290284422952  
"Rims1",28.8259383494789,-6.47618858101835,2.21586633321736,-2.9226440  
6202478,0.00347073022353166,0.0151223012063509,-27.1454931235059  
"Pyroxd1",1019.85173920701,0.425521760102899,0.108870979674329,3.90849

573849507,9.28725852805684e-05,0.000932936459454159,2.96893913248284  
"Lrrc18",33.2530455921745,0.0788963255319583,0.407738467737136,0.19349  
7380734804,0.846569457166174,0.901940400842908,0.00814264009515463  
"Lrrc29",209.401341722006,0.651445109622237,0.238093020204251,2.736094  
94752676,0.00621730840825484,0.0235114583677566,2.44309334874256  
"Iapp",0.452010276738984,1.25333708683673,3.07652650435611,0.407387059  
744849,0.683723729586044,NA,NA  
"Bivm",867.329853237911,-0.0208554310463793,0.195373424404278,-0.10674  
6509203954,0.914990084364295,0.948003436151497,-0.00111362062372176  
"Fcho2",5389.30883674337,0.265010848824319,0.113744470527177,2.3298789  
6111399,0.0198125492852097,0.0570192008801503,0.759088385752738  
"Amot",1152.16239233207,0.225206980609704,0.304117618362599,0.74052592  
4878149,0.458980936490304,0.598649428034514,0.115548998133076  
"Kcnj2",220.767481060398,0.355942545157423,0.263972987653347,1.3484051  
846428,0.177528097338385,0.304222432932311,0.423570261153114  
"Rasl12",1174.40923506717,-2.08547608112159,0.506066967501177,-4.12094  
883690811,3.77315218921807e-05,0.000465920971408321,-15.9987183435002  
"Cox6a1",19145.3998506225,0.561283289024446,0.430589175132955,1.303523  
91894463,0.192395955859402,0.32236283813239,0.635416205829578  
"Slco1a1",4372.70723246914,1.97548450278446,0.983750341762253,2.008115  
69655534,0.0446309986528369,0.106565451722618,4.42310172681928  
"Lhfp11",14.9757758517394,-0.869037883605419,0.488900761814768,-1.7775  
3432082946,0.0754803691802225,0.159018502244838,-1.5979301271579  
"Btbd7",2298.74592427523,-0.333656841214277,0.100040470875097,-3.33521  
861998088,0.000852323628045976,0.00521286264104155,-1.75390926759604  
"Zic5",4.00487613380367,-1.31936488688461,1.11651583773467,-1.18168040  
460716,0.237332536401848,0.375487649688675,-1.29235709003128  
"Tmem273",261.967967877653,-0.959948444768893,0.245153531415102,-3.915  
7031074681,9.01411207851405e-05,0.000909716135128711,-6.72192181946084  
"Mpped1",159.749695948782,2.22680525497272,0.826603853875681,2.6939207  
2699872,0.00706169580142629,0.0259344087403786,8.13270401347794  
"Trpc5",1.55666413691378,1.15434312631883,1.38907287989463,0.831016963  
203826,0.40596404657888,0.549801137750574,0.690526481173325  
"Ubr7",1189.42303419698,-0.113448427438775,0.109316577079312,-1.037797  
10698832,0.299364523992836,0.443744069394277,-0.0921776758109463  
"Gm20604",339.184911448261,-0.152017947853775,0.230161179619053,-0.660  
484744236124,0.508942805351728,0.643288397429534,-0.0670645626989084  
"Alg13",508.0804413146,0.100245008427113,0.182682849981315,0.548737927  
163749,0.583185314101643,0.707324412438034,0.0347114241104772  
"Pi4ka",4926.75946575559,1.09918714869903,0.20261650476544,5.424963528  
86704,5.79663746286204e-08,3.05467127705092e-06,13.9584001625705  
"Khdc1c",0.47942708610266,-2.10927791024867,3.10517581702456,-0.679278  
093911547,0.496961673775543,NA,NA  
"Coro2b",646.383022391818,-1.10326483784045,0.282142603940383,-3.91030  
926358633,9.21780244686223e-05,0.000927392735340143,-7.70424555957202  
"Prrxl1",2.86600031593428,0.131626373835768,1.36495079765842,0.0964330  
538958422,0.923176641231877,0.95268858636282,0.00637956187110936  
"Pgm5",404.763092332279,-1.17593115428732,0.411620189073923,-2.8568354  
6507514,0.00427887579617565,0.0176508597274554,-4.74719971740257  
"Coq5",1606.80448358433,-0.108565951813981,0.292638431751654,-0.370990

06840672,0.710644928979445,0.807944418794408,-0.0231529932586022  
"Kirrel",2151.93566876175,-1.10523759256647,0.288369391754074,-3.83271  
465062086,0.000126736931177773,0.0011978267979177,-7.43520557790473  
"AAdac14fm3",0.145470086866329,-1.10220209604883,4.77919322734928,-0.2  
30625137678343,0.817606036952608,NA,NA  
"Tspo",7240.5436823208,-0.686081041405466,0.375456231945237,-1.8273262  
8474665,0.067650725459366,0.146220357499913,-1.31908719454986  
"Tmem45b",2790.44001901377,-1.38332364204203,0.64840761301444,-2.13341  
671855297,0.0328905567907422,0.0843815889876174,-3.4201377294273  
"Rnf10",10283.7799593449,-0.399383843752143,0.236295223238721,-1.69019  
008627466,0.0909915943958624,0.183564832646718,-0.677030444699749  
"Pde3a",1646.37357503361,-0.91250284182871,0.267597329968312,-3.409984  
85275157,0.000649664875557588,0.00422520538479715,-4.98836779479521  
"Utp15",917.599109706417,0.0277120717523766,0.121533305515054,0.228020  
390253797,0.819630388907462,0.884451454032746,0.00340270022522968  
"Cd1d2",3.63978171112918,-1.33113680307434,1.04843291752341,-1.2696442  
2885417,0.204211387194891,0.336663027608521,-1.44917238660118  
"Trem3",1.56148832621044,-1.92514658927195,1.45088331015398,-1.3268789  
9557383,0.184548713561436,0.312789535554667,-2.23745296526221  
"Plekha6",8080.02045244233,0.481552143282285,0.263984975858943,1.82416  
496134082,0.0681271370168297,0.147021905650708,0.923219097187832  
"Gpr155",601.058616190396,0.370578243437908,0.201010968137981,1.843572  
25314955,0.065245502831759,0.142124751804153,0.723016708998378  
"Tpp2",1768.07388291933,0.0199096749287464,0.127691227214005,0.1559204  
60341247,0.876095717531644,0.922559640334414,0.00160478459306839  
"Ubac2",2164.82283132612,0.356432571245425,0.121138534724276,2.9423549  
8272043,0.00325726305300571,0.0143753089650306,1.51207365137854  
"Ppp2r2d",1831.54078157467,0.0742503613081813,0.161509965646322,0.4597  
2619095701,0.645712767690004,0.758303170777552,0.0205429968441001  
"Slc24a4",1.41209834216381,0.659045223095305,1.36048497687036,0.484419  
331561722,0.62808830162866,0.744375644174763,0.194556393311344  
"Enc1",975.94871225306,-1.53039641097811,0.256895582157745,-5.95727025  
791507,2.56485902201103e-09,3.04936714702263e-07,-22.9607846271662  
"Ydjc",202.943439010571,-0.194972081829887,0.214597761999585,-0.908546  
668954842,0.363589468601087,0.508592256172178,-0.131822311400708  
"Mapk1ip1",1523.95426818595,0.222109929218246,0.237119065731207,0.9367  
02110112162,0.34891181052973,0.493961072001776,0.156653814686392  
"Cir1",4396.26006754909,0.704615469357173,0.180672650022779,3.89995646  
41817,9.62099867607457e-05,0.000961015533740277,4.895330055087  
"Tram2",927.931780656365,-0.455413547820976,0.218117260745611,-2.08792  
988809869,0.0368041596354268,0.0919773781814344,-1.08671355581299  
"Cpsf2",1515.55055025913,0.0503904245767842,0.0763260790655046,0.66019  
9307939532,0.509125936348233,0.643436447168644,0.0222187515976194  
"Lad1",4550.31157227968,0.928447640560565,0.229755233284148,4.04102934  
801192,5.32170972963901e-05,0.000606090515820686,6.87838690606855  
"Myrip",126.789838452266,-0.990325896432772,0.360994638762438,-2.74332  
577300264,0.0060820313614487,0.0230939527722545,-3.73173067355233  
"Abca9",642.312663646154,-1.13011430646425,0.315997801866464,-3.576335  
97382369,0.000348443777527272,0.00259608589003697,-6.72841849868429  
"Gck",256.716382851656,-5.40289578670443,1.16955981547707,-4.619597659



9115,3.84484877981067e-06,8.12208683735086e-05,-50.8863005573197  
"Phlda3",3516.87379837799,-2.87308603383217,0.583884494660706,-4.92064  
108587386,8.62611914561558e-07,2.46615940031103e-05,-30.4841996561869  
"Efhc1",83.5858548066265,-0.965897760354018,0.362623396452959,-2.66363  
883246932,0.00773005069521172,0.0277518925529807,-3.46221342578762  
"Poldip3",3550.64310000941,-0.155798708141508,0.105399265203496,-1.478  
17641651206,0.139360564546916,0.253427745526559,-0.213861229149024  
"Fam169a",33.3049583046809,0.224610078869255,0.38998075395778,0.575951  
701692367,0.564647827878469,0.692378048423017,0.0825718669143553  
"Oasl1",343.996457661056,-0.645266660772839,0.362858483755916,-1.77828  
737554581,0.0753566687081079,0.158843710969804,-1.1871838706742  
"Abca8a",959.458106796092,-1.12722807340924,0.335573346024477,-3.35911  
086730654,0.000781936900677482,0.00487099223303819,-6.00187810346538  
"Sytl3",69.1721992320472,-0.175852773532411,0.346970276619196,-0.50682  
3740770774,0.612278496967995,0.73173191136267,-0.0549260440474816  
"Ptpr",640.322609896518,-1.19592940408303,0.21782219975802,-5.4903926  
4781821,4.01041186148995e-08,2.26182406888254e-06,-15.5462916960176  
"Pdcd7",837.74792201984,-0.415908717148962,0.125599565626298,-3.311386  
58860042,0.000928348613479434,0.0055524359710497,-2.1600296308886  
"Haus1",519.305165375726,-0.023282058488021,0.218657752473375,-0.10647  
7169113206,0.915203768828628,0.948174446579203,-0.00123899614438829  
"Rpl37",11551.4689069566,0.217835851161078,0.177086915177256,1.2301069  
8414975,0.21865704504323,0.354189172073847,0.226097085033862  
"Fhdc1",209.520869008019,-0.68549367187553,0.306678812293201,-2.235216  
92532238,0.0254031108522398,0.069337924679828,-1.82942033249474  
"Rhod",1114.77339071503,0.300599460233104,0.210521243144456,1.42788184  
101135,0.153325871156863,0.2726694487246,0.390627503978303  
"Ppp4r3a",4097.01214063118,0.177893243938504,0.106128248644255,1.67621  
011569508,0.0936970434772261,0.187682859432808,0.297615692147015  
"Card6",413.473297257341,-0.765370388384006,0.184810405641893,-4.14138  
146456463,3.45220267220326e-05,0.000434825889551803,-5.92439913390051  
"Tcf20",1631.87922549408,-0.371095574891424,0.197585211370059,-1.87815  
460640116,0.0603600179610176,0.134150191519882,-0.74545503721372  
"Oosp1",3.38891311504266,-2.95058160162316,1.74683565348211,-1.6891008  
5831001,0.0912001034077923,0.183890342941586,-4.99656109414187  
"Mcm3",839.994658478753,-0.864391639442749,0.34384667262936,-2.5138868  
8112883,0.011940872727735,0.0388491801177002,-2.80760308820327  
"Ankrd13a",3593.22403008354,-0.14184894279533,0.0732739501694028,-1.93  
587137676334,0.0528834562020076,0.121365540139683,-0.299152085988384  
"Il17f",13.8154078158267,0.888393230754993,0.650668896681962,1.3653537  
6945984,0.172141886735469,0.297423350249728,1.07726450638561  
"Ipo9",2819.7454602357,-0.446258642453947,0.212770679776237,-2.0973690  
6853548,0.0359609170256797,0.0903215200523899,-1.07297514484569  
"Ndufa7",5413.53636093881,0.431585665899672,0.270793925727314,1.593778  
97691204,0.110985547841335,0.213272512473231,0.666879494199822  
"Macc1",291.527457912503,-0.383610927707589,0.35434145485191,-1.082602  
45154751,0.278984918688987,0.422726759760481,-0.330300235770537  
"Shisa4",1275.52445234269,-0.0448076942963048,0.413210329253912,-0.108  
437982122105,0.913648273379911,0.946864783372037,-0.00244645441282801  
"Git2",2915.90581447958,-0.391805119698453,0.174458104056941,-2.245840

75252001,0.024714209958937,0.0678032455015272,-1.05440447364825  
"Lman1",4328.89789335308,0.244648758230227,0.112049127627956,2.1834061  
844957,0.0290059109170055,0.076633773856338,0.628433519083075  
"Wipi1",2105.38020162059,0.662055903351607,0.132458586116448,4.9982105  
5593614,5.78647818067618e-07,1.77095298144432e-05,7.24382352941822  
"Gpr45",9.85585868416232,-1.27956688611371,0.755289957809366,-1.694139  
94305571,0.0902386937764699,0.182385617420298,-2.17735203160805  
"Dlx1",8.39881359373504,0.56583070460284,0.70702832712951,0.8002942497  
3689,0.423540333907189,0.566755159599367,0.321294452715006  
"Tdrkh",269.893533730304,-0.688552876750842,0.266744178005083,-2.58132  
298106886,0.00984224527420665,0.0333616666189413,-2.34131922117954  
"Ammecr1l",1355.17514207591,0.0213456934409249,0.211502346194231,0.100  
924144932758,0.91961067608022,0.950769869145348,0.00107759963689237  
"Slc16a6",1337.04969849753,-0.00940818646631382,0.35964308565647,-0.02  
61597868596325,0.979129890333782,0.986669833155619,-0.0001262560847758  
63  
"Metap1d",3117.3652677194,0.662619229041593,0.238987055633174,2.772615  
55980949,0.0055607771580954,0.0214913841483734,2.54452619628026  
"Nol4",2.76710694001056,-0.229254604671597,1.03489095303673,-0.2215253  
73276174,0.824683382298225,0.887742317012687,-0.0272982081528289  
"Rnpep",3835.91492154812,-0.230913649306921,0.0781360692781281,-2.9552  
7598764888,0.00312389463601006,0.0139317698108244,-0.986828749814747  
"Fam222a",276.615043672489,0.549805222469357,0.27610650383948,1.991279  
5056396,0.0464501672956375,0.109886600573931,1.21413836338795  
"AW549877",3997.09316356087,0.105567822615961,0.129228020435231,0.8169  
11241543563,0.413979153058275,0.55740387586011,0.0617007196668171  
"Agrn",16964.7530694717,-0.101720069228512,0.276839515569344,-0.367433  
344980815,0.713295802682697,0.80986674201987,-0.0214512938514733  
"Mvk",646.805949113104,-1.06583849354303,0.345466067688051,-3.08521905  
110942,0.00203402288363323,0.0101197698864712,-4.89567795937619  
"Mfsd9",472.636865737178,0.662903086624371,0.338779212177645,1.9567407  
4085976,0.0503779573550899,0.117104126431753,1.42172279450263  
"Tango6",304.949586975674,-0.079502881428569,0.139068900813135,-0.5716  
79800183337,0.567538921729613,0.694623298948431,-0.0289697048539441  
"Tnfrsf18",185.60357490542,-1.44763348664775,0.52451538273564,-2.75994  
476863106,0.00578111343051067,0.0221671877420053,-5.51424167833327  
"Pkp2",1339.6834326707,0.437068501925272,0.133632345761517,3.270678962  
00277,0.00107289632817805,0.00621489382258337,2.22066054594001  
"Pigs",1519.52700397632,-0.157308776455759,0.108340029244505,-1.451991  
26816498,0.146504033169393,0.263250911320322,-0.209951791364494  
"S100a10",6864.98833416351,-0.269911245995528,0.182256578050085,-1.480  
94103863486,0.138622285952896,0.252408523048645,-0.371588534628897  
"Znrf3",728.038353287457,0.0536361052053929,0.159707520795939,0.335839  
570598084,0.73699184844893,0.827995797237524,0.0101236646984061  
"Dcaf17",1167.18031521947,0.199521447630049,0.150019798398151,1.329967  
4427006,0.183528998493281,0.311684383992858,0.232594959370941  
"Spidr",434.309210811485,-0.553899682787384,0.151240143188592,-3.66238  
533705094,0.000249877609326236,0.00200911902129606,-3.4397496829692  
"Mettl8",687.514464870323,0.612903686534865,0.145765520433293,4.204723  
34412823,2.61401700220778e-05,0.000351261912536508,4.87502269819604

"Arhgef11",1826.05419983213,-0.173502371940634,0.19452249519831,-0.891  
93988470975,0.372425154982321,0.5176834442037,-0.114232458305585  
"Rptn",8.815871328202,-1.92301478804123,0.9036886836433,-2.12796156779  
171,0.0333402701764856,0.0852213670557311,-4.73542985680106  
"Elmod1",21.8630354114784,0.601147493941621,0.521056957858371,1.153707  
83342465,0.248619971278928,0.388069411754362,0.569028820006472  
"Rapgef5",1236.0066394881,-0.780892856879939,0.192042986465477,-4.0662  
3991457411,4.77777509094961e-05,0.000559838093289276,-5.84721867936591  
"Zbed3",1533.28480854995,0.363169263330233,0.124848467948832,2.9088804  
1556966,0.00362725576835759,0.015615860669339,1.51059099174468  
"Tlk1",2487.76497913487,0.133610877876432,0.117759343566778,1.13460956  
752586,0.256538942642575,0.397393843143316,0.12329978463132  
"Acacb",6377.64665496303,-2.68931653896644,0.81026048870891,-3.3190764  
9014414,0.000903156866419958,0.00544856206109417,-14.0178030670385  
"Wdr41",1455.04298476361,-0.0853619981760805,0.117826354670675,-0.7244  
72877181573,0.46877547273387,0.606949482192152,-0.0426220751321916  
"Ncapg2",351.09770399464,-0.693679446732546,0.247764860609101,-2.79974  
910496676,0.0051142339512571,0.0202194897788058,-2.70611864663244  
"Mat2b",3553.26917486185,0.163955719626609,0.195383588406589,0.8391478  
57625694,0.401386343184433,0.54541995396265,0.0993898298959397  
"Igsf3",1059.69458265491,0.158130356373175,0.211465251529532,0.7477841  
1691479,0.454590383929011,0.594792867121719,0.0821553705498956  
"2010003K11Rik",300.738554076154,-1.97982545157043,0.902183881361205,-  
2.19448107250962,0.0282008431934448,0.0750150123582246,-5.127880608854  
65  
"Csgalnact2",1194.35631550674,-0.537936180303853,0.189021024527316,-2.  
84590659504184,0.0044285182713663,0.0180983544865018,-2.15816458994356  
"Tbca",4619.32400350849,0.45800617793621,0.128693177553429,3.558900220  
2239,0.000372410970485259,0.00273995300565272,2.7021514942352  
"Slr",0.121028973229319,-0.542699536171107,4.78471990596623,-0.1134234  
70304792,0.909694833164759,NA,NA  
"Dstyk",2466.6453426782,0.0145783244882777,0.142306407950593,0.1024432  
04759544,0.918404891600284,0.95000541340214,0.0007476872179617  
"Wdr60",1170.02882650998,0.259943402190384,0.213137916001907,1.2196018  
7594242,0.222615834932587,0.358516853846169,0.266644641181359  
"Wdr11",2273.55518381538,0.138091874435583,0.105496296733717,1.3089736  
6742778,0.190543270700063,0.320265547414343,0.157232069919152  
"Zfp386",1235.35756134641,0.32817029915638,0.147863708029464,2.2194107  
2308959,0.0264587948042979,0.0716385369360662,0.865096986191147  
"Myo3b",372.537703869403,0.727354111979061,0.456289113403028,1.5940641  
3743781,0.110921670292105,0.21322594176826,1.12405516562074  
"Tmcc2",454.989574046393,-0.841768748132525,0.151565616972249,-5.55382  
391434231,2.79487028923726e-08,1.75735172875028e-06,-11.1548690928097  
"Abhd14b",9463.88265203925,1.45122943318401,0.331229837854806,4.381336  
66514716,1.17953449791093e-05,0.000193427785031684,12.4088915618805  
"Svop",9.86152120932017,1.53645467894294,0.664149272859451,2.313417693  
47701,0.0206996852164451,0.058971721559066,4.34923802764893  
"Hnrnpf",12421.3212135365,-0.475941055117607,0.135981663483124,-3.5000  
384825905,0.000465190996412559,0.00326262532896583,-2.7248687192199  
"Arbs",4228.24644919004,0.611318036775036,0.322748040435291,1.89410301

593326,0.0582113375031216,0.130554525991537,1.24462170847489  
"Lce1c",0.0924932960431516,-0.544048378937457,4.78471990596623,-0.1137  
05376621746,0.90947135024012,NA,NA  
"Dao",11039.4287354221,1.93071914550703,0.726591216268468,2.6572288547  
9206,0.00787859392148431,0.0281659010416394,6.89197849900786  
"Zfp239",260.152060588113,0.27384661401616,0.435538199044656,0.6287545  
26277688,0.529509774850995,0.661855010172503,0.113018897842479  
"Kank3",2759.3956214681,-0.250153356840722,0.188447410230675,-1.327443  
85573946,0.184361900557302,0.312608777899494,-0.290879019034971  
"Dmgdh",2567.70564942275,2.40126239697127,0.954979477075485,2.51446492  
2665,0.0119213161005278,0.0388244231381479,7.80099499966091  
"Uggt2",265.870284162751,-0.394723904774159,0.212883531226093,-1.85417  
773982217,0.0637137356611713,0.139630259404464,-0.777115590414836  
"Inpp5f",2221.27400592903,0.697566054121763,0.202032457233827,3.452742  
51312214,0.000554918417900281,0.00374646790589324,3.89726092832999  
"Inka1",210.32756108315,-1.2966796354839,0.349532503023576,-3.70975409  
802286,0.000207460649383912,0.00174281246949053,-8.23683983909139  
"Csd2",379.298853620732,-1.33937056824183,0.319173652604036,-4.196369  
46005515,2.71227671089736e-05,0.00036049060197053,-10.6185896960559  
"Ccdc115",1026.91864050469,-0.230142641109997,0.180062174548797,-1.278  
12874462219,0.201204035208877,0.333028546562197,-0.253048063232044  
"Klhd8a",1079.16919626108,0.990724409973396,0.345414628818041,2.86821  
786721515,0.00412791173621115,0.0171986715608152,4.02523712369068  
"Vwa1",2172.71689075349,0.838273029524647,0.204461753322068,4.09990140  
407434,4.13326190546543e-05,0.000500561121942639,6.37069131257916  
"Bhmt2",2906.32683729503,2.07742692680348,0.753385428540419,2.75745567  
687474,0.00582531101158426,0.0223015735526939,7.90065827378651  
"Ssh1",1903.39385448769,0.0275025363525607,0.142762809463077,0.1926449  
64441343,0.847237027927554,0.902454387901199,0.00282278139273024  
"Rassf4",1116.82304484689,-0.958456798628072,0.300662567628292,-3.1878  
1551753728,0.00143351964833776,0.00776855795824788,-4.65586752975059  
"Ppig",7038.95615649504,0.632867561394224,0.23923606143252,2.645368585  
34069,0.00816019766718285,0.0289123366452055,2.24255791412887  
"Msantd2",1753.49624724132,0.194378472236421,0.183069054590254,1.06177  
678511248,0.288337031162462,0.432394664944291,0.162970124497512  
"Cox10",1205.70401273341,0.574052081788844,0.193745788008847,2.9629138  
6609464,0.00304741830758601,0.0136940682556607,2.46313837515569  
"Klhl23",304.898301925634,-1.13356461339186,0.307097090114315,-3.69122  
551102616,0.000223176155545328,0.0018445622063067,-7.1363711183829  
"Dzip1",661.245163660288,-0.329788375743182,0.255495312773795,-1.29078  
053199028,0.196779790301663,0.327764595190656,-0.367865618218037  
"Gm9774",0.152342421322912,1.89757006682526,4.76651075541791,0.3981046  
4387778,0.690553051392667,NA,NA  
"Tent2",1521.27467789466,-0.14924511779302,0.0949153420833905,-1.57240  
246431284,0.115857243134349,0.220372980140146,-0.22572336121185  
"Armc5",1491.52815859639,0.291950071353985,0.149738986900688,1.9497265  
0340968,0.051208725634767,0.118540630704819,0.62258338177972  
"Pnliprp1",17.4411729524195,2.40057099212479,0.467636237021708,5.13341  
525330372,2.84531179526072e-07,1.02169225384887e-05,27.5860778721297  
"Bend6",48.401926247504,-1.6128787362208,0.299146574738358,-5.39160021

347886,6.98329961554859e-08,3.50026673274978e-06,-20.2620655437954  
"1700069L16Rik",0.221516546435352,-0.548210677397382,4.78471990595398,  
-0.114575291380213,0.908781765330446,NA,NA  
"Nfrkb",1493.95857341411,0.0195225536388149,0.142905560759877,0.136611  
57435027,0.891337827273157,0.932718531272271,0.00135978109973802  
"Tek3",0.421124142138885,-0.0969241418350593,3.22084221481916,-0.0300  
927941732474,0.975993047546796,NA,NA  
"Cmklr1",445.839009944304,-1.92509880829793,0.418932079104552,-4.59525  
27970948,4.32224935076126e-06,8.86967069663489e-05,-17.9617259149583  
"Slc35f2",549.901930316971,1.13327238161912,0.292307022362508,3.876993  
34918367,0.000105755247920305,0.00103462911387361,7.78978826409944  
"Zfp451",1684.99069954306,0.119103084593419,0.17579659304304,0.6775050  
78635167,0.498085548901801,0.633755679488861,0.0543219357593431  
"Chchd7",1572.89263252206,0.955472442586009,0.209737719858856,4.555558  
45285721,5.22465837327168e-06,0.000102691924356906,8.77484591635896  
"Cdrt4",1.03989668556596,0.260049382875,1.45727057577345,0.17844962164  
0771,0.858369882192908,NA,NA  
"Slc35e2",1348.9216649207,0.181417219257984,0.124318981209937,1.459288  
17540442,0.14448580855261,0.260536788602497,0.244008192630687  
"Tbc1d22b",1856.09968639975,0.553687791012886,0.12125538478861,4.56629  
445346412,4.96421332680058e-06,9.88684693012846e-05,5.10595387807774  
"Kdm5b",1967.89739902946,-0.628763038661606,0.245139347673179,-2.56492  
090979975,0.0103199325498992,0.0347167089126872,-2.11297968446947  
"0610010F05Rik",703.611748950924,-0.477886691953961,0.174107490009962,  
-2.74477962967945,0.00605515434027311,0.0230090661177398,-1.8025250248  
1198  
"Abhd14a",1745.37818895909,1.08441713131907,0.207134064580257,5.235339  
40936545,1.64681956858304e-07,6.6479685193027e-06,12.9275526771541  
"Fbxo38",1347.45055423456,-0.603146431178373,0.139875226180693,-4.3120  
3185615741,1.61761120343044e-05,0.000243741756139773,-5.01781718531411  
"Zfand4",70.0423886144313,-0.268054772436322,0.21241752798877,-1.26192  
39804471,0.206976142084975,0.340042199053997,-0.2891468107638  
"Bag2",665.858204273776,-0.390868184149898,0.173609494243342,-2.251421  
7085503,0.0243588404641888,0.0670168860407441,-1.05644269512175  
"Sgsm1",356.027540943292,0.562480407270154,0.257498971089337,2.1843986  
5949991,0.0289329666462545,0.0765250932379314,1.44565146786951  
"Ammecl1",495.516121496129,-0.45679212243735,0.23306129534902,-1.95996  
560369787,0.0499998107367166,0.116377737823147,-0.982520579367188  
"Lyn",1806.06325359273,-0.721759050772194,0.208203961448281,-3.4665961  
4808282,0.00052709318256021,0.00360985699808886,-4.05923578129217  
"Rabif",1122.72696314026,-0.0985066986376965,0.131111130629162,-0.7513  
22165898447,0.452458792386894,0.592918982052535,-0.0514892064090767  
"Pglyrp3",0.259329838918977,-0.0656596331740386,4.78471990595642,-0.01  
37227746795168,0.989051153590754,NA,NA  
"Tmc7",241.629730712101,-1.15343547142813,0.279227003922481,-4.1308163  
4378151,3.61477289280857e-05,0.000451800268358856,-8.8840718436998  
"Cyp2c37",1.27710894408093,0.694952572852923,1.85065111709409,0.375517  
8739168,0.707275355959861,NA,NA  
"Grk3",2668.55868485778,-0.915049136840529,0.277061240910075,-3.302696  
30582331,0.000957600354847059,0.0056803443014323,-4.73148431394312

"Pglyrp4",0.464513853553168,-2.1810734410382,3.07295635923272,-0.70976  
3884047734,0.47785056881125,NA,NA  
"Pm20d1",1753.11696373674,1.51859107560798,0.479714561295649,3.1656138  
8402814,0.00154756068551439,0.0082426806908815,7.28685246074175  
"Cilp",76.9531778499691,-3.58762438298188,0.883625947594696,-4.0601166  
0561541,4.90482146700865e-05,0.000570269582371703,-26.7974064361317  
"Ptchd4",23.592559248098,0.452499982992326,0.617291407666598,0.7330411  
1700308,0.463533351900222,0.602531553023368,0.229243389667115  
"Isl1",2.02490338111192,-3.75099405135853,1.71496390610778,-2.18721457  
518697,0.0287268633693341,0.076133802089884,-9.65979594176632  
"Ccr8",11.982230041192,-1.10102876320469,0.820088165119096,-1.34257365  
248625,0.179410066545514,0.306746534330449,-1.30112256676515  
"Trem1",7.21394090659257,-1.39598271980531,0.866141112870084,-1.611726  
65638688,0.107021434389224,0.20740522092447,-2.19599362802232  
"Slc26a9",4.58021114293841,-0.252164755813733,0.874226658124602,-0.288  
443224042926,0.773007484977833,0.853169927663183,-0.0400428906154279  
"Fam92b",0.615563469784283,2.59972769455121,2.51309837140874,1.0344711  
2302807,0.300915969819192,NA,NA  
"Nxt2",1480.97707579559,0.771802217247023,0.280282277422389,2.75366043  
242152,0.00589328782108883,0.0225176025740917,2.9277992483622  
"Sestd1",5269.563806293,0.603680130500476,0.300762861565963,2.00716314  
294036,0.0447322946743494,0.106755236421109,1.35056319392444  
"Pelo",1382.66615099067,0.270308536882634,0.124986416022343,2.16270331  
996969,0.0305640055932086,0.0797773736353924,0.683479285591089  
"H1f8",1.98028719270345,1.12470367597589,1.18677999030883,0.9476934942  
95618,0.343285513847329,0.487904716686405,0.80712688546173  
"Gucy2f",5.51667413689474,2.0734206353249,0.771624433220405,2.68708525  
295317,0.00720785533574467,0.0263625517419526,7.53856507762649  
"Itga1",7257.28856935715,-0.135989697142317,0.132596164680755,-1.02559  
299109241,0.305083472569382,0.449767416407745,-0.108659124549673  
"Stab1",4384.37997096666,-0.441691211276747,0.328845733485307,-1.34315  
627755128,0.179221375807528,0.306549859832652,-0.522244584986553  
"Hsd3b7",2453.69150748945,-0.991879947911117,0.262549533817059,-3.7778  
7739132779,0.000158170710935491,0.00141728516627766,-6.50575257219111  
"Mrtfa",1367.51123467849,-0.568161601979225,0.182944055135427,-3.10565  
763702262,0.00189856393950589,0.00959020717421911,-2.6402542295759  
"Gm5617",1034.39550812571,0.489365275199885,0.349647084262744,1.399597  
7579271,0.161633805758944,0.28353899637318,0.616798739145298  
"Ttc19",1005.312386891,0.319646604313895,0.217689046555332,1.468363288  
69972,0.142005568015178,0.257015182879415,0.434278307424708  
"Ehbp1",725.347967429578,-0.196873458607923,0.192491452513978,-1.02276  
467882971,0.306419122056599,0.450842140194655,-0.156836882746716  
"Sgsm3",1021.7524800837,-0.445741590212562,0.201956265763288,-2.207119  
39056654,0.0273057194308665,0.0732838152048225,-1.16490797933481  
"Tmem183a",3738.67513735474,0.196128845060547,0.11650862884603,1.68338  
471581995,0.0923006401151597,0.185628401040984,0.330282631877773  
"S100a14",515.483165093968,-1.75541438861296,0.442676904623883,-3.9654  
5283993171,7.32567358530664e-05,0.000776698269304374,-12.5695720744817  
"Setd1a",2789.66886915593,-0.0322364830758934,0.148817655959531,-0.216  
617328555825,0.828506580133056,0.89072680301248,-0.00373032577579652

"S100a13",1344.04830707817,-0.468068033253696,0.233497036963929,-2.0045994559066,0.0450058848645443,0.107172049717744,-1.04534560387861  
"Prox2",107.619715504379,-0.290727559183835,0.332489707794649,-0.874395665093466,0.381902817304456,0.526743278741858,-0.186368571994735  
"Pbrm1",5591.91066102428,0.295961782736664,0.204035355984224,1.45054165396485,0.146907532288605,0.263705777315835,0.394493757446136  
"Hps4",1120.62408602985,0.0155718236920568,0.188998230974598,0.0823913727221589,0.93433549629626,0.959022817068478,0.000651531516035324  
"Specc1",1256.70900421468,-0.0197750930533272,0.270849825204366,-0.0730112823163394,0.941797139483726,0.963817152236969,-0.000728784921004907  
"Tnfrsf14",166.839628691149,-0.964924653158321,0.392385061195616,-2.45912688474467,0.0139275384194048,0.0437716221956085,-3.01902688891388  
"Ctf1",278.148341632158,-0.10081037635903,0.260601609051471,-0.386837121712165,0.698876793432979,0.799313685966461,-0.0225817069785244  
"Ubash3a",168.537111362605,-1.27999751519985,0.566162687351989,-2.26082987062703,0.0237697941337155,0.065739495889246,-3.48422412138896  
"Arl15",1149.52842749139,-0.0211994799342428,0.15559737730845,-0.136245740776323,0.891627016363665,0.932918892678226,-0.00147202857783255  
"Ikbke",1197.27398822868,-0.885274689819264,0.217990911789791,-4.06106237434769,4.88499170427111e-05,0.000569491712762559,-6.61368034281232  
"Arel1",1724.63146457213,-0.297534765717645,0.155012710196916,-1.91942173864117,0.0549309819645491,0.124801245204472,-0.619179620135569  
"Grap2",436.057062757418,-1.37318715375515,0.452700750908989,-3.03332201459329,0.00241877346307802,0.0115449804120184,-6.12648071091728  
"Frem3",9.46565241255908,-1.69417896894043,0.974161643582803,-1.73911483797445,0.082014565187472,0.169452155560594,-3.00748051710312  
"Gnl3",1685.0910232922,0.197514657785006,0.24296745567001,0.812926394773064,0.416260260271554,0.559586497157665,0.114668549954425  
"Gjb5",177.81245442991,-1.56651570489926,0.67234785515745,-2.32991849811496,0.0198104591441223,0.0570192008801503,-4.48707621957238  
"Osbpl6",3098.77882432195,1.74239327797234,0.404113279624422,4.31164568408072,1.62043952999713e-05,0.000243979381898719,14.4939710034951  
"Lgalsl",1262.25448152855,-0.733454724273721,0.141458985941091,-5.18492847516355,2.16097782046207e-07,8.21340069071529e-06,-8.5885666952579  
"Snx18",2897.3469609997,-0.242368871216465,0.186668947789694,-1.29838880052789,0.194153765632645,0.324582879388264,-0.272716936494309  
"Gjb3",167.977334914642,-1.11717923224977,0.325129969229287,-3.43610044591709,0.000590152127595319,0.00391121216310453,-6.1935388125989  
"Rbm45",913.033788530593,-0.452793663054725,0.31933300923656,-1.41793566577171,0.156209548370314,0.276611913007391,-0.581903153611994  
"Slc5a10",4079.36427923677,2.5325653143657,0.945989886852295,2.67715897343534,0.00742493959643315,0.0269542863994142,9.151710802032  
"Dmrt3",0.183426502768653,-0.55695670027347,4.78471990596623,-0.116403198352109,0.90733300070876,NA,NA  
"Fam83g",465.185096701514,0.124983497154339,0.183677117819944,0.680452190440288,0.49621818436001,0.632001674114596,0.0573503319412493  
"Esm1",1059.76947528847,0.196487080167935,0.471388480796334,0.416826223322221,0.67680552007081,0.78233068712003,0.0482332071822274  
"Smim12",1498.54932508308,0.466823075353463,0.187571016111014,2.488780

43651036,0.0128182100171045,0.0409183789969718,1.49204868758131  
"Gzmk",59.4200893390108,-1.49287794630167,0.62026731952619,-2.40682992  
526842,0.016091661796278,0.0487348899819554,-4.51052182928349  
"Tex13b",10.3644287060145,0.352449680969118,0.544866837548174,0.646854  
711428381,0.517725979040466,0.651097854704012,0.151234513441175  
"Dlgap3",17.4244600098374,-0.563037896697003,0.623824545533412,-0.9025  
58100235648,0.366760472599001,0.511633089699887,-0.377318457185955  
"Tsen2",373.97288853452,-0.0959402301505786,0.131157117055869,-0.73149  
0843228207,0.464479395532933,0.603399244060305,-0.0484667213798845  
"Gatad2b",3272.54575199928,-0.120629443198299,0.146923506393899,-0.821  
035695097651,0.41162593640151,0.555232273120488,-0.0709745938223151  
"Rbm7",2497.03957145186,-0.306258240771183,0.146300976724167,-2.093343  
78777658,0.0363184764595964,0.0910085662523084,-0.734040254434474  
"Crtac1",12.6011752623894,-1.53405835169009,0.814725238418651,-1.88291  
497470685,0.0597118915134844,0.133088987280512,-3.09379269392799  
"Dennd4b",1212.69224235663,-0.776753146631133,0.191427529611485,-4.057  
68777462471,4.9560965277893e-05,0.0005752395827274,-5.79514079524798  
"Atf4",6056.33709005992,-0.138218998926138,0.088416326957293,-1.563274  
60869191,0.11798801792761,0.223561446256216,-0.207061594101157  
"Zmym6",2148.88742315023,0.152675548709659,0.180308637059064,0.8467456  
20175956,0.397136924678121,0.54164631766746,0.0936117975428534  
"Agps",7312.81094368438,1.4287842546468,0.283739707838612,5.0355456609  
5301,4.76489525238475e-07,1.51440601952762e-05,15.8565078789712  
"Prdm14",1.55431073511441,-0.408882790356139,1.61319650087908,-0.25346  
1243024843,0.799911807087523,0.872172817034161,-0.0559219547328683  
"Ccno",27.3259710566612,-0.530008704051948,0.536288468428419,-0.988290  
323685546,0.323010483009862,0.468073440522315,-0.402345545234471  
"Nfkbil1",1059.57074906375,-0.0215764318251025,0.154180282693766,-0.13  
9942873680922,0.888705126272252,0.930910742025163,-0.00154469730788279  
"Fbrs",4177.57611710512,-0.0588033630884042,0.136501608718184,-0.43078  
8791726312,0.666621949990885,0.774277403998468,-0.0150433742727888  
"Frmpd3",46.4925426154823,1.73881503351708,0.486080717723279,3.5772145  
8621399,0.000347275077365264,0.002591339249318,10.3556528236652  
"Dhx29",955.384086873425,0.252831102462843,0.192881673888846,1.3108093  
5459189,0.189922181302316,0.319407694646124,0.288552838440119  
"Mgat3",3400.5649566013,0.573033704653372,0.353777678442452,1.61975652  
951373,0.105284587642238,0.204981322839246,0.908164680492679  
"Adora1",1322.36367224114,-1.64658464392547,0.544609747188903,-3.02342  
117897191,0.00249934127353148,0.0118285247920627,-7.30629340137406  
"Mfap4",1251.32985768364,-2.40478736502612,0.574058966729247,-4.189094  
6826031,2.80069534859787e-05,0.000369722125301025,-19.0044546245402  
"Zfp532",920.89324433862,-0.452222276929553,0.321904252296448,-1.40483  
474108659,0.160070425756097,0.281454879735989,-0.573319773420704  
"Mindy2",3838.5698161139,0.249261079545604,0.200649257522065,1.2422726  
235017,0.214135992544793,0.348807316845312,0.262530645157793  
"Zmym4",1507.06173958935,-0.114360762298559,0.114335894069178,-1.00021  
750150802,0.31720526131484,0.462379529773923,-0.0882143733993496  
"Mios",793.205091586937,-0.0988253291398682,0.123603844212645,-0.79953  
2812020406,0.423981528569257,0.567112015095244,-0.0560535722517252  
"Hoxd1",2.82630893255667,-0.280135448024809,1.07932628353711,-0.259546



582250147,0.795213545571986,0.868777593520624,-0.0394061268979073  
"Mybph",3.71757483195118,-1.32475232552159,1.12428443135764,-1.1783070  
9789503,0.238674199135022,0.37675433409445,-1.29317279697606  
"Reln",178.324960781142,-0.895597717906012,0.424759948601041,-2.108479  
67388566,0.0349895191310605,0.0883826459408494,-2.17279139038273  
"C1galt1",3127.27278744915,0.396735863029871,0.130717656656735,3.03505  
947992702,0.00240488254071174,0.0114899288847825,1.77193518662954  
"Dctpp1",895.888949023559,0.589373058173504,0.203489407147303,2.896332  
86781786,0.0037755169152068,0.0160766605836869,2.43433864785683  
"Zfp410",1646.23095428195,0.353458417506923,0.138214711633182,2.557314  
00319375,0.0105483951715605,0.0353749819381806,1.18116981996345  
"Tbc1d8b",872.913669436113,0.426421464512794,0.14405185828663,2.960194  
12442645,0.0030744524929248,0.0137742818720238,1.82719553194142  
"Fcmr",33.2787362344689,-0.67313256506439,0.779180265248991,-0.8638983  
75107443,0.387643719531434,0.531935902837913,-0.42490300398075  
"Abcb4",162.461530680079,0.550629845603688,0.436410200349471,1.2617254  
2521406,0.207047604751835,0.340130945947534,0.59381277120115  
"Tfap2e",3.5433371745812,-0.0689391906002163,0.964299181849459,-0.0714  
914954796454,0.943006592864396,0.964676943739244,-0.00247919165628083  
"Mustn1",636.790408924168,-0.788054052038261,0.210835371749629,-3.7377  
6964225002,0.000185659931113812,0.00159682282172788,-5.07486269699012  
"Leo1",1085.51351105213,-0.444768237423716,0.11919438300891,-3.7314529  
9464713,0.000190378536212799,0.00163164865893502,-2.8545956357191  
"Clspn",108.932180854053,0.0173987167180955,0.53339573436811,0.0326187  
773861876,0.973978595608856,0.984025832261292,0.000280173796734201  
"Tbc1d10b",2533.60290209539,-0.125817508629237,0.120766342285959,-1.04  
18259446106,0.297492383170481,0.441802074842429,-0.102779478773663  
"Prdm10",643.373907044927,-0.168721961561162,0.132338624606636,-1.2749  
2606230927,0.202335413359557,0.334390226282814,-0.184825903494226  
"Radx",87.0787413153064,-0.301821986491354,0.29359085863982,-1.0280360  
495203,0.303932870504846,0.448673766588696,-0.241898017819707  
"Hoxd11",421.759483196087,-1.01095078631606,0.392204371196213,-2.57761  
22362754,0.00994855674693555,0.0336240179323538,-3.4296653509433  
"Ago4",922.122068448588,-0.225913940233256,0.311871079923066,-0.724382  
460499335,0.468830964780798,0.606949482192152,-0.112801025512186  
"Cpa6",435.543279006094,0.731650797247348,0.313972281717799,2.33030378  
746924,0.0197901007293769,0.0569714135569748,2.09633000065603  
"Cd2bp2",3195.97487357949,-0.0108815797398211,0.0690036505622985,-0.15  
7695711040635,0.874696580300132,0.921844759913505,-0.00088552601440527  
2  
"Sdhaf3",369.853569516615,0.155140638392422,0.267359287340311,0.580270  
242099164,0.561732391649192,0.689757426309966,0.0576216066380293  
"Usp22",2485.72906405135,-0.451099646733566,0.145465815885563,-3.10106  
978734057,0.00192822840157784,0.00971442275120668,-2.09046054818899  
"Elmsan1",1320.45779155446,-0.902245549231418,0.199775223257485,-4.516  
30354615366,6.29284423951218e-06,0.000118548673412569,-8.1564684268872  
6  
"Dmtf1",2077.22174115286,-0.0882965140628362,0.165599885495454,-0.5331  
91878718178,0.593900762741011,0.716620896832987,-0.0294211325345853  
"AA986860",977.588513757602,-0.112130935212857,0.232471252088856,-0.48

2343232573108,0.629562140426946,0.745550640027836,-0.0329252553790972  
"Klhl14",328.620655352658,0.111168769970218,0.293966327846569,0.378168  
379979358,0.705305513413573,0.804213269037301,0.0242226505542653  
"Pwvp3b",112.219154670715,0.385389168077548,0.20968042221316,1.8379835  
5616512,0.0660648284211763,0.143540452925796,0.748093706003373  
"Ubap2l",4590.61922195219,-0.0568187595889726,0.177714684517285,-0.319  
718990826817,0.74918136223816,0.83662876293927,-0.010135037139913  
"Dnal1",776.18424924242,0.054611972361488,0.22564349068218,0.242027687  
997476,0.808758708989228,0.878121647011892,0.00709792595655166  
"Sun2",5373.86745480626,-0.983152848931536,0.264354204775177,-3.719073  
99682811,0.000199954473349263,0.00169500673184033,-6.27258258760223  
"Kcnj12",57.8374844697271,-0.0235125970394798,0.381625087364297,-0.061  
6117698180435,0.950872003791887,0.969670623950534,-0.00072416043409434  
3  
"Golga7b",70.0719377410802,-3.67512023454546,1.11862487383093,-3.28539  
112666014,0.00101840892075038,0.00595767690872815,-18.8279153251187  
"Gtpbp1",1704.17105501397,-0.115723483263207,0.131604473413997,-0.8793  
27884996494,0.379223520702481,0.52410690435618,-0.074764267252389  
"Acot5",6.95304371170335,-1.46400811003933,1.02788204608993,-1.4242958  
2811416,0.154360854663447,0.274035140146398,-1.895156935043  
"Sem1",5362.57479601819,0.441421575247415,0.160035169240312,2.75827855  
428808,0.00581066598846784,0.0222586179652546,1.6796205800823  
"Asxl1",2290.7338594722,-0.182683934181908,0.118818876928344,-1.537499  
2501577,0.124171098532807,0.232483971499201,-0.266523802122855  
"Sin3a",1797.97193456426,-0.257894437934012,0.109478559752812,-2.35566  
158813473,0.0184897534196185,0.0540986212748681,-0.752264298270322  
"Adprhl2",2087.40374931987,0.17358163446711,0.12651443932993,1.3720302  
2347857,0.170054029299612,0.294468335993235,0.212218094193821  
"Fam227a",338.915944256149,0.197761875432865,0.204968485420724,0.96484  
0399864076,0.334624757245641,0.479355926586989,0.145416659528983  
"Nek10",2.89722190280321,-0.690439014351484,1.41660464882572,-0.487390  
052633115,0.625981941522055,0.742736925442526,-0.205345792449097  
"Dhrs7b",1924.36098612789,-0.570444781335667,0.448662442572974,-1.2714  
342169233,0.203574216233728,0.335868172967103,-0.622376099556928  
"Mier2",1288.04986396134,-0.151747294261766,0.133629432375928,-1.13558  
286945999,0.256131181612283,0.396982971309721,-0.14019354247987  
"Ube2q1",3965.54773027655,0.0178121254273873,0.0628068345891287,0.2836  
01705832035,0.77671562970066,0.855598568289921,0.00277787176566094  
"Thsd7b",29.9554293095346,1.13639287811267,0.353449330803431,3.2151507  
4177541,0.00130376038769161,0.00720011905131115,5.60657349399958  
"Cux2",313.923281123194,0.18444714924346,0.266373743975132,0.692437424  
540909,0.488662670222476,0.625312858650671,0.086598523231621  
"Ipo11",1140.33867832279,0.0821595870480986,0.113914697494022,0.721237  
810883976,0.47076321198163,0.608723463573037,0.0407832957764236  
"Sh2b3",2105.84229308968,-0.475263717052645,0.146563549081291,-3.24271  
430401185,0.00118396869243869,0.00668937165029544,-2.3797572765074  
"Fam199x",1248.25777906009,0.467287095509345,0.169078721280667,2.76372  
503866799,0.00571456717345776,0.0219595251769963,1.78436114076626  
"Tfap2d",0.149762844135821,1.36369449992258,4.78471990596446,0.2850103  
09218446,0.775636243738567,NA,NA

"Kdm7a",2569.27915165679,0.0704468268411943,0.168370405894339,0.418403  
854685741,0.675651868735642,0.781275064441201,0.0173882490910532  
"Kcna4",2.35907139270284,-0.532288767212847,1.05869679257794,-0.502777  
349420997,0.615120820330151,0.734363565686829,-0.164344716791203  
"Atxn2",2530.78796058791,0.654588226089079,0.272473990771973,2.4023879  
2786974,0.0162884247951156,0.0491704144070543,1.97192292231255  
"Hirip3",877.916521143855,-0.0453259783473207,0.259792820826259,-0.174  
469710914888,0.861496332861331,0.91235975765196,-0.00415733932712277  
"Asb4",61.9681174671916,-0.607949384101924,0.292079028174748,-2.081455  
10446643,0.0373922693736333,0.093065415911042,-1.44354701775917  
"Stk40",3035.85282807827,0.00573086615336843,0.139915535262698,0.04095  
94698873749,0.967328207072501,0.980044966562724,0.000115516061122988  
"Pbxip1",10850.2275918269,0.172340763824984,0.167930505284206,1.026262  
402613,0.304767914150499,0.449498093048898,0.137807753622994  
"Oscp1",385.350213018593,0.0461582438857512,0.217618538681331,0.212106  
211931433,0.832024173543422,0.892673419561928,0.00524055205901521  
"Maff",556.469098343323,-1.61519249792138,0.293143051181512,-5.5099122  
8143172,3.59012563402498e-08,2.08334135750652e-06,-21.1292012818139  
"Safb2",8769.72041580486,0.139496914232405,0.237545333675266,0.5872433  
36141907,0.55704029113895,0.686350198683975,0.0525020752668755  
"Shc1",3580.0894714209,-0.623138851825124,0.141529686328051,-4.4028844  
2652769,1.06821077955727e-05,0.00018045887560481,-5.37146166484338  
"Zfyve1",2091.5403570856,0.0229255857819866,0.132020597798333,0.173651  
582891682,0.86213929053636,0.912858294041004,0.00209023156252493  
"Xkr7",0.184412451228424,0.909179615714358,4.78471990596623,0.19001731  
210654,0.849295564579289,NA,NA  
"Pla2g6",1170.92380196827,0.0515898159033288,0.297656346410088,0.17332  
0060282714,0.862399856484,0.913068657782637,0.00469179458781451  
"Gucy2c",6.42442997153691,-1.34729445361553,0.933458794664205,-1.44333  
575441881,0.14892591242801,0.2665709575435,-1.78127795542982  
"Rgs1",11.3513298995262,-1.57094212511008,0.643527503872008,-2.441142  
16666415,0.0146408898271477,0.045434994405495,-4.85652464430659  
"Flad1",1941.06171190981,-0.0374952718738954,0.2577357849629,-0.145479  
495132167,0.884332304026781,0.927951660474155,-0.00280373285981733  
"Itpr3",1966.85965259834,-0.857688490872867,0.149636569262906,-5.73181  
07137697,9.9364124473122e-09,7.94017089744645e-07,-12.0472305039865  
"Acad12",1471.99367296727,1.36521222135421,0.314639586556396,4.3389715  
715556,1.4315103696275e-05,0.000224189471381501,11.4719042477145  
"Alkbh5",4825.50458676738,0.233978453442414,0.188873244103528,1.238812  
06442434,0.21541510497277,0.350364007070326,0.245392541214463  
"Shisal2b",0.222154623861919,-1.33062269906676,4.76837581088075,-0.279  
05155798133,0.780205258059674,NA,NA  
"Arrdc4",2309.24988394921,-0.588091118679196,0.118507621051803,-4.9624  
7510041673,6.96004914246564e-07,2.04686332096222e-05,-6.34939452886401  
"Wdr55",1608.23292263923,0.984168564286752,0.172693908841516,5.6989188  
0315212,1.20569629551224e-08,9.25538046058966e-07,13.6729461927646  
"Dusp15",606.215576315186,1.35950348822152,0.463330059362663,2.9342009  
23833,0.0033440765612582,0.0146787043654688,5.73895027098747  
"Immp1l",1299.38300180867,0.0185590658407775,0.341961411578798,0.05427  
2398031966,0.956718140311973,0.973595527129585,0.000496628194709172

"Rgs8",3.77470909455589,-0.0875236388476242,1.26457628620467,-0.069211  
8299247138,0.944821006771626,0.966007976066987,-0.00302684645720013  
"Dcst1",233.426192702745,1.02612715426773,0.335439344660536,3.05905425  
407438,0.00222036935235443,0.0108397626295872,4.64274738338265  
"Ype13",5252.42463211268,0.174315628289979,0.141471334967749,1.2321621  
7850576,0.21788850838794,0.353188694939162,0.1814194814162  
"Zc3h12a",597.595844732586,-0.889240986787206,0.182758899823905,-4.865  
65079809533,1.14080788817008e-06,3.05542200598079e-05,-9.2445561864538  
6  
"Myo15",39.096189716882,0.151411194551445,0.47233813005017,0.320556789  
551084,0.748546287701524,0.836443709975114,0.0270414417478795  
"Garem1",278.093628288484,0.382271517179051,0.29622249671255,1.2904877  
9691436,0.196881346101424,0.32790573898399,0.426243863097568  
"Selenok",6147.36211288689,0.0352843104046669,0.128003487012211,0.2756  
51165669423,0.782816006984378,0.859567860797511,0.00533941603652372  
"Npl",900.1278666827,0.530877297008282,0.430200888461842,1.23402185175  
954,0.217194761732031,0.352550081506463,0.553472810604307  
"Jph1",63.839095450612,-0.962347432838758,0.320542462677671,-3.0022463  
3204516,0.00267995221267827,0.012435437468539,-4.22201549018613  
"Mapk6",1623.56527650594,-0.713186884255682,0.224289799965906,-3.17975  
620988602,0.00147399001800457,0.00793480324987662,-3.44932602683319  
"Stn1",511.984473976842,-0.412959791838568,0.217128657646827,-1.901912  
88572452,0.0571825443058836,0.128925213792336,-0.845957541126421  
"Dhx9",4487.82418574679,-0.188974776995113,0.180117980072287,-1.049172  
19768549,0.294098872097158,0.438271156232834,-0.155888597200012  
"Sipa1l1",3095.12899085483,0.291882624464464,0.180395366276267,1.61801  
619680995,0.105659107155516,0.20548047744658,0.461876305400777  
"Commd10",1222.55331168962,-0.291682935473101,0.225378432179008,-1.294  
19187387651,0.195599152964383,0.326271903883953,-0.326691941865032  
"Dnali1",23.1928559997315,0.0646191593881606,0.50869176352027,0.127030  
087809915,0.89891658481888,0.938079403275451,0.00413050073054405  
"Shcbp1l",15.8049439701003,-0.879883320569313,0.585278894129908,-1.503  
357338517,0.132746921498322,0.243936827497514,-1.24137985529291  
"Atpaf2",1458.65970705105,-0.683546518767453,0.357458167568861,-1.9122  
4199300405,0.0558451622024061,0.126519944596196,-1.41313353098207  
"Tceal9",4920.07175296287,0.0109725300199622,0.179184668220911,0.06123  
58754178371,0.95117135887925,0.969888762835502,0.000335472942857773  
"Ppp1r3a",5.47473099666842,-2.31887865677112,0.88207689048092,-2.62888  
494392687,0.00856653391340147,0.0299820998462577,-8.13266628925437  
"Naa25",1255.86996469401,-0.126999285997352,0.2034692413608,-0.6241694  
57496286,0.532516302802645,0.664724895777591,-0.0518642242531002  
"Map3k9",193.842681513715,0.304056728865259,0.187360786804171,1.622840  
79850208,0.104623441726546,0.204015188197238,0.483316668114957  
"Traf1",3752.44707387538,-0.530492897417746,0.153908680814401,-3.4468  
0296530817,0.000567262132306958,0.00380608295103959,-2.95545800700808  
"Wdr74",1106.07393818923,0.314717799086832,0.160513657927416,1.9606917  
1402939,0.0499149962417429,0.116221948497911,0.677352505644239  
"Ttc9",166.12480241314,-2.05077322598255,0.420813207455553,-4.87335756  
019291,1.09717382660114e-06,2.9878066021046e-05,-21.3657469122441  
"Dpm3",2050.10448220635,0.427852279956256,0.206305662460177,2.07387560

212432,0.0380908654729301,0.094442484103661,1.00963052034008  
"Bmt2",1279.64531373268,0.0289249732173048,0.128571511094153,0.2249718  
69515659,0.822001158205117,0.885882079520417,0.00350488037690545  
"Sgtb",95.2734927649116,-0.303892904759377,0.281130950453957,-1.080965  
66482156,0.279712387100498,0.423467048970068,-0.261128965853642  
"Hectd4",2283.67304481398,-0.180494455029159,0.177819424832495,-1.0150  
4352069063,0.310085082395401,0.45527401630614,-0.142023110190341  
"Id1",2290.72914176176,-0.72893937323394,0.341319015928701,-2.13565415  
114818,0.0327076140974348,0.0840338726672531,-1.80524410058622  
"Krtcap2",1938.14067313002,0.357727374997221,0.124742339327689,2.86773  
021032976,0.00413427908531853,0.0171986715608152,1.45341882717707  
"Bex2",54.4724300702369,0.254170465653677,0.525372181669161,0.48379125  
2224569,0.628534023949667,0.744722678595686,0.074915060464933  
"Nmnat2",28.9974429527081,-0.692495712862551,0.604305142129979,-1.1459  
3715092632,0.251821157944689,0.391891526666577,-0.648709344094289  
"Tmem108",205.223356376,0.5105436356904,0.432849583993882,1.1794943429  
9934,0.238201387970339,0.376324337991094,0.498956289536943  
"Apobr",474.759822522677,-1.8469612161888,0.273900459583285,-6.7431840  
7131839,1.54952694368128e-11,5.49321388143594e-09,-35.1287449250467  
"Mrap2",5.45307162376104,1.8640047453409,0.876706370956156,2.126144861  
1443,0.0334911995571837,0.0855286717702643,4.58340801025955  
"Maneal",16.0138257901804,-1.31111594107722,0.438700676830308,-2.98863  
441595365,0.00280227208900676,0.0128531407178202,-5.70881787350944  
"Trim46",437.952975543959,-0.43222929580682,0.440992584738254,-0.9801  
13826261325,0.327029934986059,0.4718038973258,-0.324682342730851  
"Hebp1",3419.86276217236,0.595005950809724,0.345147469018618,1.7239180  
47267,0.0847226388236152,0.173849927571338,1.04100029941633  
"Smg7",3916.4709949289,0.284382497838665,0.11906284016341,2.3885075935  
3934,0.01691695872803,0.0505221716225503,0.848979298397962  
"Muc1",2451.43835776851,0.157757175881922,0.556335196215418,0.28356497  
4776173,0.77674378178787,0.855598568289921,0.0246028586818164  
"Exog",338.648296047877,-0.345929342427187,0.180375346191254,-1.917830  
51138482,0.0551325056022609,0.125215328390551,-0.718744450535019  
"Fam166b",22.9356333344263,1.49126846488676,0.504772782478807,2.954336  
12241043,0.00313342522025931,0.0139646914159122,6.36954043004352  
"Rnf214",1505.04776219674,1.08276755360034,0.32008062497098,3.38279629  
920903,0.000717518308401454,0.00455784247435214,5.83709800279066  
"Lgr6",56.3691358977694,-2.20625400493635,0.794213718620751,-2.7779097  
1524362,0.0054709817478245,0.0212623484391234,-8.49588141994938  
"Aqp11",1397.24036384443,2.0961389157882,0.465288218410836,4.505033295  
16367,6.63625366260265e-06,0.00012299778889109,18.8722601063583  
"Olfr769",154.404518403559,0.294566098510629,0.255607403591906,1.15241  
614433408,0.249150109999156,0.388696499020926,0.278352134166588  
"Gpr153",952.059978596641,-1.72954657884944,0.359865017112408,-4.80609  
811069576,1.53904394889466e-06,3.86704625200363e-05,-17.5729447147827  
"Hecw2",346.851706628118,-0.278921682388206,0.306841726705605,-0.90900  
8319640351,0.363345734253724,0.508324253891018,-0.188728378955374  
"Gpx2",37.0953489467039,-3.87245825328112,0.949399918407885,-4.0788483  
1059931,4.5259354563241e-05,0.000537107057379229,-29.1569507383208  
"Krbal",1683.2276171428,0.229120509545769,0.200912535198649,1.14039927

533257,0.254119994657772,0.394712949560842,0.212989621056419  
"Fofx1",77.5720793079991,-2.00316585177651,0.521643290377729,-3.840106  
61830998,0.000122980888802511,0.00116798897704401,-13.5263209891113  
"Mcts2",376.251904639719,0.326398457709703,0.245724366917671,1.3283113  
1810001,0.184075282261481,0.312231392216994,0.379931305179467  
"Flt3",327.298830023471,-1.3930117798433,0.364340569415848,-3.82337817  
080522,0.000131635647247995,0.00123052468075979,-9.33361720940176  
"Snail",191.344360103236,-1.4937969168246,0.280868112986498,-5.3184994  
9408962,1.04626511074709e-07,4.72224007623768e-06,-18.3187710989828  
"Fgf11",457.16224708772,-0.532622047775193,0.213433349532613,-2.495495  
89575179,0.0125781210343563,0.0403248291246752,-1.71013642223981  
"Trim72",46.399676330684,-0.533709351346523,0.346246394143483,-1.54141  
490098914,0.123215839718184,0.231064009836614,-0.781916493400263  
"Alkbh6",945.897063496813,-0.10930708912701,0.141003713404539,-0.77520  
7166448224,0.438217254193441,0.580362048667101,-0.0594743313306805  
"Nrep",2293.37627254317,-0.848178146817786,0.223135286157929,-3.801183  
40501944,0.000144006656423949,0.00132133731150784,-5.62266703252854  
"Serpnb6b",1439.3160295336,-0.987921534623658,0.352247281663326,-2.80  
462500649729,0.00503751493690134,0.0199962268403303,-3.86495816787337  
"Wfdc12",0.358936840130043,-0.551039971452688,2.72043557928645,-0.2025  
55787627665,0.839482249913832,NA,NA  
"Lrrtm3",2.46819570816268,-2.47880253117666,2.02529948318871,-1.223919  
00642464,0.220982782888893,0.356770911713805,-2.55480610461995  
"Vmn1r226",1.46402840273698,3.88983453744972,1.45160096101555,2.679685  
83785477,0.0073691285702602,0.0267815971785524,14.0813577850243  
"Zc3h6",616.051981307377,0.653397699852092,0.316675017124145,2.0633067  
4830577,0.0390834933218627,0.0962913763949558,1.52919663075139  
"Trp53rkb",262.829659629759,0.126632650566439,0.208665182559872,0.6068  
70053800685,0.543937153001957,0.674233096581829,0.0499159806039767  
"Tom1",2044.37565313692,0.439154661977295,0.147400672825738,2.97932603  
398953,0.00288883217003119,0.0131388965829877,1.90249627208337  
"Lhflpl4",40.0089508497178,0.350289447029798,0.422846641083006,0.828407  
779550117,0.407439602250572,0.551225184893259,0.208636552341827  
"Olfr1260",197.441605010534,1.26288103716329,0.351910627583919,3.58864  
137134403,0.000332405727359502,0.00250725217487643,7.56284881107453  
"Abra",12.166085171979,-0.476488883552338,0.530218913405284,-0.8986644  
41243958,0.368831422782696,0.513786888720227,-0.317316205729181  
"Aida",2129.20106493178,-0.606710667306348,0.112860606519232,-5.375752  
31976943,7.62635686055708e-08,3.7081971587816e-06,-7.58689550234004  
"Foxo4",2146.70912401207,-0.00412920521114625,0.136211359107114,-0.030  
3146906264925,0.97581608053193,0.984806518540972,-6.32184826895954e-05  
"Olfr648",161.673412356044,0.0639646007550846,0.165686615062956,0.3860  
57743594918,0.699453904150465,0.79973917921338,0.014294145692973  
"Mamstr",117.460922969622,-0.725728272378493,0.28055718719905,-2.58673  
919432904,0.00968888966843292,0.0329923106453205,-2.47580803487962  
"Gm14117",2.01690277510483,1.10671290619878,2.4963992342608,0.44332368  
437314,0.657531626993692,0.766962889634064,0.293629596042946  
"Greb1l",540.101723846717,1.42258585490909,0.576639922150313,2.4670263  
0231396,0.0136240349691913,0.0430258234255412,4.4753907969042  
"Egflam",923.070516777189,-1.26411873397348,0.252145965606392,-5.01344

025447076,5.34653738146112e-07,1.65998066661989e-05,-13.9130418600371  
"Gm5436",0.119103556816106,-0.0636404980581492,4.78471990596623,-0.013  
3007781665116,0.989387827356347,NA,NA  
"Sbk1",2500.1774201852,-0.0531627018496393,0.334924382877734,-0.158730  
461463735,0.873881237651179,0.921235285353051,-0.00436145785707127  
"Upk3b",890.524659117967,-2.68914775939516,0.674246261052238,-3.988376  
22799486,6.65270976221614e-05,0.000722571430079824,-19.4497836112729  
"Notum",791.689623610679,1.23927055443735,0.34186015937077,3.625080374  
14586,0.000288871596668462,0.00224488576797197,7.55843583411335  
"Borcs5",596.939369308991,0.356683458042737,0.186099745145204,1.916625  
1827182,0.0552855663767934,0.125460657962607,0.740390343438253  
"Nh1rc3",1000.59492620804,-0.213067526233892,0.141841058271578,-1.5021  
5691302824,0.133056589443954,0.244356916358502,-0.300238852592302  
"Rasef",172.249088853547,-1.56571950826115,0.444381091822293,-3.523371  
12688692,0.000426094257265654,0.00304544935050063,-9.07194607907632  
"Gng2",1066.59793708902,-1.79750615687491,0.42727441630426,-4.20691267  
317751,2.58883121058313e-05,0.000349563926204639,-14.3060353309777  
"Klhl6",636.794245960155,-0.741370262675688,0.251186406360761,-2.95147  
445841839,0.00316260701375373,0.0140561913731867,-3.16171606042129  
"Onecut1",0.816294748029367,0.603144692937581,1.60685284096353,0.37535  
7766163522,0.707394410167364,NA,NA  
"Nemp2",489.856643435224,-0.518697460016043,0.246495201895858,-2.10429  
029054768,0.0353531325041901,0.0890948952698751,-1.25423807288547  
"Ptgir",383.893637441357,-1.44445969437512,0.372041755876359,-3.882520  
36649123,0.000103379354653675,0.00101546128818002,-9.95581176236588  
"Edem3",2525.25458691308,0.124423717574883,0.194925752265507,0.6383133  
89220147,0.523269697917676,0.656416556121904,0.0523773705088158  
"Wdr63",5.47145192919969,-2.67305926214221,1.37046334284092,-1.9504784  
8313919,0.0511191155188555,0.118375358003164,-5.70402700073546  
"Gm16433",0.674553218644088,-1.03279874525012,2.41887872682169,-0.4269  
74173528401,0.669398138841378,NA,NA  
"Trpv3",46.0551091378608,-0.757326806049556,0.488976625491741,-1.54879  
960834109,0.121429899742971,0.228691218505598,-1.11734677408174  
"Ccdc63",41.9776813066773,0.642565122590341,0.599340685882291,1.072119  
97737884,0.283666146956111,0.42765967164233,0.545812523851416  
"Tnp2",0.834034823200716,-1.95355908918984,3.10374401353817,-0.6294201  
71466669,0.529074015576025,NA,NA  
"Disc1",51.9218852077219,-0.163239758229084,0.374882654790221,-0.43544  
2280786319,0.663241426237289,0.771545929764016,-0.042337712841216  
"Zfp513",1528.92040730968,-0.0205049293445084,0.175889231520404,-0.116  
578651047945,0.907193956345062,0.943127331475567,-0.00120064516918614  
"Fscb",0.811181975053526,2.38063019770262,1.98777675008093,1.197634592  
31812,0.231059302992688,NA,NA  
"Tmem18",1269.70375589799,-0.0559231060445093,0.0819438789893582,-0.68  
2456172861574,0.494950546687113,0.630919571084292,-0.0257568901039159  
"Spice1",1077.16341945492,0.217075555811641,0.152092386185392,1.427261  
16182462,0.153504630921802,0.272937560980604,0.281875262820967  
"Dpy19l1",1193.10305067468,-0.793753440287124,0.136925921002114,-5.796  
95527682351,6.7529690374664e-09,5.96319630519015e-07,-11.3764624681513  
"Fam89a",95.1188498626019,-0.762590893247593,0.230388373960073,-3.3100

2333207904,0.000932881946200251,0.0055662270292408,-3.95863817423529  
"Synpo",7892.23401366231,-0.562567002485236,0.379271294982514,-1.48328  
389184099,0.137999000237607,0.251491214752114,-0.776537798763092  
"Tmem82",1611.94001560211,1.8248746575628,0.424234119285984,4.30157447  
174261,1.6958875676922e-05,0.000252608218448148,15.1166609385155  
"Il17re",1680.46342409213,-0.162336964688755,0.242203145135051,-0.6702  
51266135446,0.502697627976187,0.637543797988793,-0.0730731115471789  
"Zfp866",1069.12323595525,-0.224406452295891,0.108678595380136,-2.0648  
6338465235,0.0389359284364812,0.096024883968443,-0.525817510382904  
"Tuba1c",4591.03384452664,0.122381836079476,0.176504322103733,0.693364  
528532912,0.488080816844799,0.624724785109099,0.057573809065542  
"Hic1",707.834146396114,-1.58208672035965,0.272253752165251,-5.8110740  
7254157,6.20732887026242e-09,5.60381183856537e-07,-22.7735823932284  
"Qrfp",6.29976643612892,-1.78239847484689,0.833265425208194,-2.1390524  
8066851,0.0324314182964112,0.0834782566261948,-4.42599678226495  
"Lrrn4",20.9849834902414,-3.95819714992401,1.32934506748073,-2.9775543  
2111038,0.00290558150940541,0.0131996803985057,-17.1293461945188  
"A530016L24Rik",1602.59241038801,-4.76668286659616,1.47249494688212,-3  
.23714718117654,0.00120731126766457,0.00678977649175767,-23.7968884587  
28  
"Mob1a",3865.99644709995,-0.749922967275312,0.180052407877763,-4.16502  
60394431,3.11317030550112e-05,0.000401990692825569,-5.86370889117947  
"Tmem186",1033.92200289701,0.0938702744812471,0.171025778363336,0.5488  
66231626348,0.58309725371075,0.707305602392199,0.0325065677224944  
"Aqp6",2052.04177564407,0.947841200016551,0.556618521032649,1.70285602  
113652,0.0885950159771995,0.1798839551727,1.62596786397579  
"Crppa",255.843055810646,0.213855739713903,0.2104223474405,1.016316671  
28119,0.309478612246728,0.454554725543255,0.168611770234651  
"Ppp2r3a",4051.14703533097,0.880566137840222,0.174824155771807,5.03686  
766827347,4.73211689155206e-07,1.51177569890021e-05,9.77396760657065  
"Hpd1",38.8635099797041,-0.11221908558343,0.379311034109647,-0.2958497  
78920461,0.767344805591833,0.849739749379717,-0.0182720898447198  
"Arl11",133.081047372793,-1.13687561582726,0.392712578583597,-2.894930  
48561787,0.00379242506073744,0.0161351356379485,-4.69160832238285  
"Pyurf",2023.20856190057,0.217403652249443,0.315552683258446,0.6889615  
07170527,0.490847491311384,0.627329862715611,0.101371579321399  
"Tmem212",0.232709513347443,0,4.78471990595262,0,1,NA,NA  
"Lor",27.6031773459452,0.460228549275535,0.455546646082482,1.010277549  
4745,0.312362334117941,0.457412000798469,0.359977314505389  
"Simc1",392.394967304286,0.544524153824155,0.314190769593005,1.7331004  
1707947,0.0830778222566641,0.171014714776229,0.961632745751093  
"Rfesd",517.39847379299,0.315177757376304,0.233816855051486,1.34796850  
854444,0.177668511519808,0.304436298234749,0.374838831376046  
"Gm1840",0.632874726207147,0.861334323926041,2.53969608722726,0.339148  
580910093,0.734497802520164,NA,NA  
"Zmpste24",3379.18832389452,0.243284876783246,0.186963600337537,1.3012  
4193342463,0.193175655945156,0.323419108674107,0.274621488658924  
"Hoxa6",88.4684746844588,-0.610936044142384,0.321315837982903,-1.90135  
677088812,0.0572552977308963,0.129029564858647,-1.2510221171455  
"Gm4835",0.18827594438763,-1.53871353359654,4.7633584801309,-0.3230312



26815048,0.746671593171412,NA,NA  
"Olfr1009",0.52786307638529,2.97197620866614,3.54539868104436,0.838262  
908077431,0.401883062899703,NA,NA  
"Fam124b",7.66887897303805,-1.88917664196212,0.67459812221749,-2.80044  
752533873,0.00510318036777177,0.020195212261176,-7.37215237167038  
"Upf2",2729.36966768734,0.0566692005009849,0.177195807548782,0.3198111  
8111603,0.749111471118766,0.836598629009319,0.0101104007255036  
"Fam129c",203.711194492498,-0.173960177824903,0.312753490122158,-0.556  
221379838019,0.578059525352955,0.703119440132995,-0.0612737326667015  
"Exoc3l",439.532717184305,-0.161413523002379,0.224164253934436,-0.7200  
68075838666,0.471483082120247,0.609414541244381,-0.079941104709397  
"Tmem64",5586.92704806727,-0.332786752291571,0.435475619108564,-0.7641  
91467188908,0.444753150733782,0.585932225203194,-0.177891542055295  
"Pigv",1167.85186648598,0.304003129971029,0.108334534091756,2.80615163  
502293,0.00501370924983982,0.0199227497125525,1.19044372819792  
"Fam13c",385.19903231077,0.0358626545246468,0.153252735110854,0.234009  
882425302,0.814977306585589,0.882212657080868,0.00449438476301368  
"Uevld",675.284584978368,-0.337212151579866,0.146495340952607,-2.30186  
263526946,0.0213429199422349,0.060494876149687,-0.945946384217358  
"Ifi209",636.158840840132,-1.12552896395889,0.419627432882557,-2.68221  
016015866,0.00731374975554898,0.0266448977454585,-4.08021987873336  
"Olfr1031",8.79278166498351,-0.423630180021792,0.693375212239321,-0.61  
096816347622,0.541220657097758,0.671719947300579,-0.168568282191845  
"Trim56",3084.4719487726,-0.219600627287737,0.190667182681159,-1.15174  
842466185,0.249424467030265,0.389031138161435,-0.207324050076572  
"Teddm1b",8.92894158034772,0.0750273637340244,0.637428995232981,0.1177  
03092101422,0.90630291667165,0.942923678875182,0.0044093532155023  
"Tmem11",1579.30025720942,0.0583738367832922,0.210209918651038,0.27769  
3065854787,0.781247983977088,0.858750809703298,0.00888896312263467  
"Pnp1a1",627.517901841401,2.39435406999488,0.441311512526228,5.4255418  
2710695,5.77789969947279e-08,3.05304846450733e-06,30.4067881739188  
"Mei4",10.3537749636717,0.559227825382034,0.722849923619287,0.77364305  
799743,0.439141901837846,0.581131315463168,0.303536857767879  
"Zfp784",357.390093230169,0.293866476219696,0.151062654460375,1.945328  
42858775,0.0517354626841889,0.119363158373721,0.624638080397361  
"Smco3",73.2508784614279,-0.247779850509855,0.510763313900241,-0.48511  
6772811624,0.62759351486946,0.743924758521778,-0.0732970907048511  
"B3galnt1",486.508420627106,-0.1439097828476,0.308451179541119,-0.4665  
56111283781,0.640817493611154,0.754371761784114,-0.0405638475728603  
"Kcnj6",0.117614786697194,0,4.78471990596623,0,1,NA,NA  
"Vmn1r75",0.134652852526316,1.38440950995805,4.78471990595898,0.289339  
718346707,0.772321420636896,NA,NA  
"Olfr571",37.4076417158625,0.308900925802664,0.348514270760732,0.88633  
6519673639,0.37543621541113,0.520532982157876,0.201682040486642  
"D17H6S53E",921.364963663945,-0.246373100163354,0.157896732848823,-1.5  
603432428158,0.118678789618385,0.22459468504118,-0.367947853049214  
"Olfr131",0.0929913071132142,0.911659748055755,4.78471990596623,0.1905  
35656417207,0.848889405144033,NA,NA  
"Pcdhb19",44.8559138587839,-1.29457088801309,0.299677009930007,-4.3198  
872289718,1.56108955175091e-05,0.000239293428302195,-10.7938990746333

"Olfr30",5.28560438528935,-0.560658230968581,0.863542564699899,-0.6492537297955,0.516174387798855,0.649775209071087,-0.241715914871477  
"Cox8c",0.223297874701269,1.37099285966478,4.78471990595911,0.286535656550614,0.774467887773744,NA,NA  
"Fbrsl1",3649.57334915358,-0.0338808344697529,0.160616847156183,-0.21094197196392,0.832932552039248,0.893072251837297,-0.00383150877032393  
"Olfr975",12.5649466914316,-0.250130024733867,0.561849782382686,-0.445190213784757,0.656182298320947,0.765755473585218,-0.0667577989336912  
"Rhbd12",465.012643358495,-0.951018271690725,0.196737083902824,-4.83395531144738,1.33846645177857e-06,3.44293125023463e-05,-9.77323650950316  
"Filip1l",1740.98136263575,-1.13893304027168,0.228854951797072,-4.97665893321629,6.46911620267635e-07,1.9358130187683e-05,-12.3601547189863  
"Hoxd9",2493.61023614217,0.712913606779403,0.228112437770189,3.12527284241128,0.0017764021007788,0.00913645163835007,3.34747385817295  
"Olfr78",163.839860256509,0.0904417288999174,0.336728252545572,0.268589666047334,0.788245465473197,0.863438768864966,0.0132797665561931  
"Hexim2",198.827321581933,-0.41650908378494,0.269354374122002,-1.54632381650608,0.122026382857713,0.229548520304843,-0.612951783916951  
"Olfr1342",0.223214397671005,-0.0691395152828403,4.78471990596524,-0.0144500653416812,0.988470917183191,NA,NA  
"Gprasp1",2710.09984437056,-0.298444872829398,0.131805445863718,-2.26428332208655,0.0235566946851514,0.0652890451984479,-0.814435470597244  
"Olfr267",6.4202528549881,0.0219240126231866,0.6812348680406,0.0321827517229784,0.974326311185415,0.984077077375299,0.000351903517781805  
"Tmem130",15.2296846551206,-0.100772121617844,0.610570448808487,-0.165045854764995,0.868907890047146,0.917816026877906,-0.00864204733852025  
"2510009E07Rik",1875.85032011944,-0.0211913827905531,0.127259671932179,-0.166520803242732,0.867747113101148,0.91708673701806,-0.00183418248867441  
"Gpr135",295.040087418074,0.642436182929914,0.200526879208704,3.20374099205564,0.00135654455141486,0.00744648245030601,3.14794597721894  
"Hfm1",1.55137908775743,-0.5143749751333,1.68955588293823,-0.304443895776194,0.760789729877407,0.845188726921585,-0.0865154692487654  
"Usp48",4279.89200868201,0.162683856818598,0.157830084335422,1.0307531514262,0.302656592695084,0.447263774774045,0.130896530653371  
"Otud1",559.917589789568,-0.36829393042534,0.223343593119349,-1.64900154636866,0.0991473179119857,0.19600267714163,-0.600181718578704  
"Lrit2",0.864376212958859,4.67577634212402,2.34874745748734,1.99075312555148,0.046508034988654,NA,NA  
"Rnf227",134.850788729837,-0.180229531971574,0.217669062111969,-0.827997925947157,0.407671674488247,0.551462627249329,-0.107269230596696  
"Hilpda",240.556182842179,-1.41876762930317,0.28783878801081,-4.92903558657943,8.263652278497e-07,2.38350136281264e-05,-15.1018661634418  
"Eif3j2",1625.50423186354,0.461138493420152,0.322266324918501,1.43092361119881,0.152452109271411,0.271437423666695,0.601335501301831  
"Psap1l",82.8447675817921,-3.72161893069792,0.942248315347349,-3.94972203195289,7.82420031690144e-05,0.000817557651548469,-26.4576928701056  
"Leng9",379.581815932528,0.108182025169695,0.139611533001399,0.774878857383583,0.43841124645034,0.580519014145245,0.0588329253935126  
"Epop",169.498259677376,0.623626224155926,0.453465529985195,1.37524504

712913,0.169055486879496,0.293312322759958,0.764888346236334  
"Gpr149",0.196401232263413,-0.544957266022007,4.7847199059633,-0.11389  
5332795304,0.909320765382157,NA,NA  
"Pgp",2269.97435964009,0.131094994117433,0.247963469664808,0.528686722  
663806,0.597022789210016,0.719319677687505,0.0431891679107114  
"Gjc2",196.804787863466,-1.5767333975573,0.474115934766983,-3.32562835  
782399,0.000882194699936533,0.00535357368794352,-8.24630141873674  
"Magea10",0.15302085674268,-1.26591390880537,4.77380538540979,-0.26517  
9203298565,0.790871414939366,NA,NA  
"Zfp536",58.0426989549864,-1.35731951575947,0.398570142687103,-3.40547  
213749784,0.000660497530817504,0.00427569085520574,-7.4039195059558  
"Pcdhb12",42.8912684650083,-0.712792031226815,0.271171243545071,-2.628  
56791859032,0.00857452310073075,0.0299956779076628,-2.49954922540911  
"Elfn2",3.15089820241873,-2.04209495787508,1.43516999366146,-1.4228941  
2884476,0.154766848485743,0.27453428832271,-2.63977350066798  
"Sptssb",1833.88096215989,-2.90693089625099,0.984886657395606,-2.95153  
850894676,0.00316195115795631,0.0140561913731867,-12.3971658480618  
"Rab9b",1.88522195458327,-0.748534228112122,1.40345039434843,-0.533352  
82182142,0.593789369143451,0.716530828045488,-0.249511913450662  
"Zbtb37",1479.36359929603,-0.235120807735033,0.130029303516494,-1.8082  
1400543155,0.070573199675818,0.151051706568944,-0.444409614891199  
"Adam30",1.87723308572148,0.431829638063169,1.95687696807005,0.2206728  
60434888,0.825347164761967,0.888309727231665,0.0511436589237631  
"Gm6863",7.77707020633462,0.779111260852541,1.06074882963658,0.7344917  
46853463,0.462649088361226,0.601903778265643,0.395521817652371  
"Krt34",0.309236822951277,2.75316189084849,4.71739224594471,0.58361945  
4840804,0.559476368148288,NA,NA  
"Acot6",408.001398372347,0.260597695049168,0.184913477038243,1.4092953  
0515114,0.158747866486701,0.279760113951345,0.33195528008478  
"Tril",1103.90523923992,-1.3826176607224,0.294084852624515,-4.70142426  
032296,2.58353093024e-06,5.85060233191865e-05,-13.4755182862286  
"Lgals2",4.07347115231433,-1.62868265978194,0.862488905745396,-1.88835  
201117673,0.0589787092059849,0.131816468603656,-3.3002724972114  
"Gimap5",493.600160343065,-0.225215503155288,0.206319389759074,-1.0915  
8670650529,0.275014801777735,0.418434538046217,-0.196215588741588  
"Hscb",771.873171695591,0.652252891361352,0.153858999446496,4.23928982  
840014,2.24228011407106e-05,0.000313854828888424,5.26145013318751  
"Rai2",262.125615328646,-0.367891015123391,0.175226105602032,-2.099521  
72285865,0.0357709349567364,0.0899834459794151,-0.885929228057634  
"Sorcs1",138.422851684366,-1.48527131622591,0.610362070697323,-2.43342  
662909742,0.014956666339424,0.0460921574657957,-4.57034687883691  
"Setx",1849.87291351286,-0.308959349270742,0.112917965305294,-2.736139  
89089703,0.0062164592904619,0.0235114583677566,-1.1586801713392  
"Casc1",104.606685605863,0.217368799877003,0.323862465094761,0.6711762  
65558905,0.502108246722455,0.637127853351192,0.097986579639426  
"Zc2hc1a",1342.56532770599,0.0585893165393495,0.239681071701024,0.2444  
46990008595,0.806884652569814,0.877024383612742,0.00768811844781249  
"Fam90a1b",0.884744766658689,-1.31838273419425,2.07595755036036,-0.635  
072106346972,0.525381388307709,NA,NA  
"Fbxl7",278.375940955111,-0.0930040402621986,0.280951606802306,-0.3310

32241889408,0.740620131717055,0.831038594211122,-0.0172130986841923  
"Mdga1",101.392866370506,-0.488881769689718,0.461622289544279,-1.05905  
148161791,0.289576334521883,0.433338830566076,-0.408820212094209  
"Pars2",239.867498035479,-0.133429089952715,0.222415436054822,-0.59990  
9306293954,0.548566679892991,0.678487554610266,-0.0517556952703793  
"Pxylp1",559.933853772203,0.288628294330491,0.23426277690531,1.2320706  
6074844,0.217922689945097,0.353205038117166,0.300377355313614  
"Unc5cl",47.2717324980629,-1.67092944975162,0.548575860479747,-3.04594  
053462422,0.00231953704896337,0.0111926656384197,-7.50664481988973  
"Zfp3",209.202428606142,-0.285316567828181,0.188197792502214,-1.516046  
30444762,0.129507644275215,0.239533106835844,-0.407735532558979  
"Mmp3",325.734700584225,-2.18502117625484,0.396137080115123,-5.5158208  
7599536,3.47155709465695e-08,2.02247398202931e-06,-28.6482257252849  
"Vps37d",758.3056276513,0.30417996440034,0.355700983433752,0.855156377  
314297,0.392464582274345,0.536926355963036,0.189167796258696  
"Eif5al3-  
ps",0.100341358323926,0.857183598344413,4.78471990596623,0.17915021468  
1441,0.85781975412629,NA,NA  
"Ubxn10",127.843103676549,0.631774160581923,0.495264453853438,1.275629  
92996239,0.202086368753221,0.334091912663243,0.692638737516255  
"4933412A08Rik",4.78140615349856,-1.23334166258298,1.21527514270833,-1  
.01486619715959,0.310169613357925,0.45532955287252,-0.970311610120226  
"1700019D03Rik",72.9026717742089,-1.46392278192933,0.462899711709585,-  
3.1625052790004,0.0015641789958278,0.00831018039799742,-7.012591184371  
83  
"Ecm2",616.123472505756,-1.16252613069112,0.245947427220539,-4.7267261  
2935565,2.28168672248879e-06,5.28364937233805e-05,-11.4489159011136  
"Fam221b",22.4660892244979,0.292377743784845,0.664551504973827,0.43996  
2503427572,NA,NA,NA  
"Adamts3",13.0551379956812,-1.46954126579422,0.601659113004378,-2.4424  
8152156474,0.0145866763335514,0.045331688739494,-4.54639176328276  
"Rbm20",407.025745730517,0.115293668195755,0.291347146734706,0.3957260  
93383501,0.692307103866141,0.794456118602909,0.0265287878145413  
"Pld6",29.3201925063311,1.18609805507323,0.331483410674788,3.578152079  
03991,0.0003460321005369,0.00258602295755787,7.06633824380263  
"Npsr1",0.565067600416269,3.42557817434843,2.84101616043256,1.20575807  
419091,0.227910785533925,NA,NA  
"Gm9785",0.383535217732872,-1.56333306405424,4.68855883811918,-0.33343  
5735378629,0.738805392053998,NA,NA  
"Tmem221",275.082390509653,0.776625340960672,0.287219458537506,2.70394  
40326055,0.00685218292935992,0.0253614014344457,2.85373069829456  
"Tox3",371.643263859839,1.04587464176071,0.375722255146313,2.783637720  
24477,0.00537530367016994,0.0210035412747442,4.04028091068939  
"Diras1",1.81073277744611,0.189863643859044,1.60034660566802,0.1186390  
7680161,0.905561305158293,0.942441117052384,0.0112554655661407  
"Dpy19l3",628.233754725401,-0.0845814691433397,0.176510226575835,-0.47  
9187358059395,0.631805346970044,0.747191160018313,-0.0246499347355978  
"Kcns3",378.74228564483,-0.844898177487855,0.197007690595495,-4.288655  
81304964,1.79757676458258e-05,0.000265322874760266,-6.95736733726236  
"Fam25c",601.145649729264,-1.21886820464966,0.532370732405127,-2.28951

016736607,0.0220497278446714,0.0621369552703286,-3.38652093995685  
"Fem1a",1930.72940579447,0.0445183925995572,0.192486723986607,0.231280  
327689793,0.817097028646226,0.882841508619313,0.0055474184901874  
"1190005I06Rik",149.173978673371,-2.05911704905106,0.762706101151311,-  
2.69975164213687,0.0069391255841273,0.0255957379189016,-7.547342317436  
82  
"Pde12",922.58205904006,0.231404999379734,0.126950348371463,1.82279924  
669944,0.0683338018781162,0.147402640670374,0.44304509249759  
"Capn13",415.300294770169,-2.2749428756321,0.681338086966699,-3.338933  
95826453,0.000841005559791471,0.005160186564254,-11.9816294266112  
"Rpl7",27788.0488468774,-0.148980222855566,0.157353403070785,-0.946787  
422122343,0.343747112301034,0.488403855594947,-0.106761111171559  
"Col6a6",380.351505152349,-1.09980885316604,0.38919665366109,-2.825843  
54932235,0.00471562899009384,0.0189812828341969,-4.359974325527  
"F830045P16Rik",0.124244059077056,-0.541888455620593,4.78471990596623,  
-0.113253955564858,0.909829220433712,NA,NA  
"Pttn11",4758.10715572937,-0.653837674540627,0.218538922072568,-2.9918  
5915414882,0.00277284159886101,0.0127541555778703,-2.85197333173599  
"B430306N03Rik",83.1798947444044,-1.40510905954871,0.381033699480535,-  
3.68762411688073,0.000226357691377225,0.00186618277652141,-8.829508938  
64161  
"1520401A03Rik",9.72321755422698,0.0817186624666644,0.716580845417836,  
0.114039696970988,0.909206325063334,0.944413356295671,0.00467359909403  
975  
"Dmrta1",6.63827680937665,-0.940018443794484,0.722739787404069,-1.3006  
3192891433,0.193384472587957,0.323647020064466,-1.06043649971015  
"Pkhd1",4040.91936596212,0.758090380800411,0.372711336123157,2.0339879  
8836081,0.0419528065401856,0.101601766478765,1.73352099616557  
"Gm12481",880.753766628864,0.750488553493257,0.270520309222847,2.77424  
107509439,0.00553306594292681,0.0214225019370904,2.88436272694393  
"Bicdl2",249.881079621102,0.137122258720489,0.23691670350964,0.5787783  
49897604,0.562738741352769,0.690732135907856,0.0507356714175999  
"Defb12",0.177714481740462,0.899380045712553,4.78471990596623,0.187969  
215207579,0.850900783701441,NA,NA  
"Vwce",482.44710700301,1.87855228406927,0.650729714148685,2.8868395636  
8409,0.00389132598314926,0.0164547980957372,7.71547378413246  
"Prr33",1.24635414822484,-1.77660275762003,2.20848346844976,-0.8044446  
71196529,0.421140211109447,NA,NA  
"Oaz1-  
ps",1939.01979512153,-0.105472527996828,0.370977274527251,-0.284309943  
597583,0.776172866550455,0.855191308976103,-0.0164990761912634  
"Ly6g5b",51.5740778799422,-0.0562017000963435,0.378463375176479,-0.148  
499706398635,0.881948417646344,0.926371289515079,-0.00429831524605276  
"Rtn4r",182.058720464275,0.490937585504595,0.383750048787926,1.2793160  
2107992,0.200785793092541,0.332420938585239,0.540695693487024  
"Adamts15",936.990718318572,-1.11784116205805,0.234877624163833,-4.759  
24927305264,1.9431433721305e-06,4.64876189813503e-05,-11.1519462160678  
"Lysmd4",605.187269093821,0.287445279387415,0.143049970581718,2.009404  
67319572,0.0444942350378085,0.106322536162412,0.644244784003122  
"Clec4a3",373.149372930171,-1.35804765839711,0.376414094815262,-3.6078

5548974625,0.000308738360908991,0.0023598611341799,-8.21503739215596  
"Tmem145",19.1861876811521,-2.02490351909248,0.824151516203315,-2.4569  
5540113882,0.0140120080788464,0.0439886736259378,-6.32544037969522  
"Clrn1",4.70937075974898,-0.613612617906002,0.876207024495923,-0.70030  
5522269705,0.483736523789657,0.621336939449982,-0.292007057835636  
"Mgat5b",39.2335612647576,-0.832104833509075,0.618224935027052,-1.3459  
5805889432,0.178316043008268,0.305302600300028,-0.98725232916368  
"Taf10",3547.08062117261,0.524345712459846,0.163850873274971,3.2001398  
7096609,0.00137360909562614,0.00751188980923027,2.56471551221109  
"Zmym1",411.940445214675,-0.32925759568471,0.189225870285015,-1.740024  
21121793,0.0818547667475635,0.169211645678964,-0.584960692852032  
"Chil5",3.75569558706434,-1.85418722479137,0.964733510768248,-1.921968  
2991159,0.0546097467564225,0.124245139119805,-3.86690511461632  
"Olfr323",0.11403309701371,0,4.78471990596623,0,1,NA,NA  
"Kbtbd7",725.310262292211,-0.0915540058504124,0.252709668409091,-0.362  
289288046562,0.717135862163977,0.812537997085031,-0.0190059341358323  
"Slc36a4",734.271339871339,-0.524442142633581,0.159675544461641,-3.284  
4237005847,0.00102191164031517,0.00597279171548718,-2.68542740791773  
"Gm8399",2.43888610756081,-0.782950036521275,1.30518150188903,-0.59987  
8281593853,0.548587357597232,0.678487554610266,-0.303697818193077  
"Slpr2",493.627548358779,-1.17991827985322,0.323125236790009,-3.651581  
9425767,0.000260629910726346,0.00207165185460346,-7.29119762899026  
"Zfp469",167.73165739465,-2.05030899391076,0.459322610331423,-4.463766  
74649515,8.05312311167888e-06,0.000143659464255732,-18.1412670238541  
"Trp53bp1",2158.49107437742,-0.0658099629340008,0.133855906970532,-0.4  
91647805639901,0.622968341936281,0.740676320055275,-0.0197555957103144  
"Olfr922",0.419353641084299,-1.02624826846306,2.38405285033699,-0.4304  
63724123399,0.666858349291353,NA,NA  
"Ccdc60",24.8568943078379,-0.103546375941256,0.36576603334162,-0.28309  
4564564296,0.777104348092884,0.855850687930132,-0.0161179613712559  
"Ccdc84",1586.61707059389,0.520201463111542,0.219453096031146,2.370444  
85823847,0.0177666938992261,0.0524600222192964,1.53339987171374  
"Ncmap",98.3325686221779,-0.995030651849718,0.563976875851825,-1.76431  
108163226,0.0776796192621254,0.162580207854543,-1.80755657478212  
"Olfr544",0.0837058623428615,-0.544048378937457,4.78471990596623,-0.11  
3705376621746,0.90947135024012,NA,NA  
"Klhl15",451.995179669317,0.0823985616136492,0.262843828519307,0.31348  
8667692255,0.753909428991429,0.84012836751871,0.0143538772527467  
"Gimap7",222.738860072679,-1.57049665446364,0.487429297234577,-3.22199  
888963144,0.00127299628472475,0.00707181383926476,-7.77653134912674  
"Klri2",95.5408207597472,-1.95570639846018,0.407124906717658,-4.803701  
18897309,1.55759227352723e-06,3.89436729509225e-05,-19.8570580795489  
"A530064D06Rik",87.9968606768375,-0.617078604870434,0.316736746060027,  
-1.94823812691909,0.0513864767023066,0.118770599889683,-1.314723842947  
26  
"Wdfy3",5048.84807398713,0.168545280637379,0.221646811355879,0.7604227  
62711258,0.447001921258095,0.587981074053183,0.0895077441404932  
"Naalad2",316.37773163473,-1.00224815927635,0.18680023570006,-5.365347  
40183965,8.0793561935005e-08,3.88966140891044e-06,-12.4851941892945  
"Adam6a",0.128230219553068,-0.069788710760181,4.78471990595917,-0.0145

857463199177,0.988362670833664,NA,NA  
"Olfr691",4.91953211691702,0.0130518890369712,0.89078396270427,0.01465  
21374243738,0.988309704056613,0.992279228099683,0.000101161685745886  
"Ccr12",257.138505328315,-0.931829980965132,0.297816697115219,-3.12887  
084569548,0.00175479421023616,0.00904679468830902,-4.38458132009604  
"Thrap3",6798.05114291015,-0.236640268414272,0.152660894378747,-1.5501  
0403533451,0.121116547664285,0.228211291685179,-0.349632059183392  
"Orai3",1319.43885317549,-0.614845367530354,0.253650818587215,-2.42398  
337586656,0.0153513082016613,0.0469521266378026,-1.88058250579812  
"Emx2",1987.12088577688,0.730217433310509,0.46150590632577,1.582249378  
18035,0.113592652015881,0.217289269989761,1.11469573091146  
"Opn5",1.78092369813069,-0.191616801339053,1.17342139265672,-0.1632975  
18298363,0.870284187787863,0.918523389276158,-0.0162851114679318  
"Spata31d1d",0.143938970413971,1.56167753579723,4.76352019991278,0.327  
841065064829,0.743031836253549,NA,NA  
"Cep164",1911.57315212215,-0.0964181401020293,0.178283579083892,-0.540  
813352511054,0.58863623848085,0.712119462548838,-0.0327348839055058  
"Pura",5415.2734027376,0.464957287169683,0.218331324844443,2.129594951  
62206,0.0332050682095362,0.0850095089219455,1.14611606717983  
"Mgat2",2521.9114537778,0.246720750710758,0.202390618763747,1.21903254  
319687,0.222831840995953,0.358781753964932,0.25289888577714  
"Gpr75",16.4249028382508,0.0590011341990998,0.446204401936418,0.132228  
938000274,0.894803212865721,0.934987837323463,0.00396615996416459  
"Gls2",47.7289978860009,-0.438146705658141,0.470436899881817,-0.931361  
263897903,0.35166672117125,0.496689440738648,-0.306610821574355  
"Cilp2",13.7125176888108,-0.128995418996869,0.510427747523949,-0.25272  
0232437632,0.80048441206083,0.872629155001792,-0.01757493019252  
"Npy5r",4.90355812406413,-5.35423950429408,1.94184614050239,-2.7572933  
7799587,0.00582820342451825,0.0223082666610241,-20.3610911013382  
"Adgrd1",128.788127875226,-2.23057187801777,0.511069882789572,-4.36451  
44296953,1.274054399713e-05,0.000204784613314521,-18.9454777849311  
"Mrpl50",2996.40904986962,0.615978926957914,0.267240164546431,2.304963  
88147109,0.0211685963384832,0.0601199483775878,1.7317715157799  
"Muc19",21.2282050706407,1.19992963371639,0.566390705241467,2.11855459  
9523,0.0341281260223709,0.0868481076982756,2.93214154296238  
"Pcdhb21",21.6503073016402,-1.20868182336969,0.407548244179263,-2.9657  
3924837728,0.00301956381619173,0.013600458267013,-5.19449360259604  
"Rel12",54.1294939858446,0.134397784021331,0.289932778602776,0.4635480  
84038694,0.642971557176563,0.756131448843705,0.0375695624299399  
"Slc35g1",1578.1156278455,-0.579444865789372,0.282329292246171,-2.0523  
7246613482,0.040133478285343,0.0981460882231814,-1.34506433215016  
"Irf2bp1",1483.83477648705,-0.081017417647185,0.108946935513586,-0.743  
641087886148,0.457093638858712,0.597106510147874,-0.0417774231560989  
"Ccgc141",2803.94474884053,0.707391736440759,0.360429746626189,1.96263  
416952212,0.0496886973814933,0.115777990146314,1.52519374082726  
"Npb",30.7041891478834,0.986929842107016,0.370143197666804,2.666346020  
48105,0.00766807241928889,0.0275699937361783,3.54409198758091  
"Als2cl",5149.97549944935,-0.629578210577295,0.31275899080477,-2.01298  
197361907,0.0441165257944697,0.105712672967994,-1.41468143983176  
"Krt13",4.90560077297854,-2.96707454688623,1.40675225239348,-2.1091663

7370794,0.0349302233179037,0.0882786123464013,-7.20185369921943  
"Fmn1",1172.22895930544,0.657139193148534,0.347601272474202,1.89049708  
728355,0.0586915097657245,0.131355263706623,1.33389378733815  
"Pcdhb14",108.605209219451,-1.2056032792791,0.275937364444703,-4.36911  
93532462,1.24748576792787e-05,0.000201186745269294,-10.2612234624048  
"Ccr10",11.9836576279633,-1.61171914908422,0.732175316670959,-2.201274  
90286392,0.0277165684640199,0.0740364568469885,-4.19562349652197  
"Otos",8.54083488678386,0.292439491788415,0.961477337850585,0.30415640  
6267644,0.761008735131505,0.84523772814549,0.0491700029711159  
"Efcab9",4.46581619234855,-2.51047392089245,1.02976876469935,-2.437900  
63065799,0.0147728342850079,0.0457157596491842,-7.74559579190504  
"Gm9788",0.241801009321614,0,4.78471990595701,0,1,NA,NA  
"Cep68",978.270608947563,0.0973891054803592,0.115484570465129,0.843308  
375206418,0.399055999992136,0.543313587587925,0.0594140368301616  
"Gpr22",4.43271962831365,2.36496983441317,0.901834265637155,2.62239961  
878394,0.00873129846828756,0.0304548940133579,8.25731245601159  
"Zrsr1",1521.73801729322,0.128197844726252,0.217637261838684,0.5890436  
39141511,0.55583199990055,0.685144287145083,0.0484749157661087  
"Tafa2",1.36584521537147,-0.93369964802651,1.47339232835138,-0.6337074  
1794974,0.526271782980469,0.658785774560425,-0.389685966232023  
"Eml6",346.680478779058,-0.266770938639777,0.269653902165187,-0.989308  
652675664,0.322512151892499,0.46766157345294,-0.202748681994878  
"S100a1",9641.83904967357,0.492318459322551,0.28877084737098,1.7048759  
0352248,0.0882175713307479,0.179285616615272,0.846184719614297  
"Efcab8",16.8683819666106,-2.4386633974331,0.875771333662382,-2.784589  
20005393,0.0053595577154512,0.0209588159518387,-9.42591179443502  
"Lmod3",21.0631380993781,0.989504970971975,0.497453855035839,1.9891392  
1553726,0.0466858388751701,0.1103504044597,2.18096244548284  
"C130050018Rik",94.1394012215821,-0.340999840396818,0.382008607844491,  
-0.892649624627393,0.372044835262005,0.51725042834118,-0.2247966885624  
15  
"Rsbn1",1701.79439541836,0.267749683253212,0.241732061962518,1.1076299  
9777302,0.268021642684955,0.410225740857897,0.238577734978639  
"Il1f9",100.064204325242,1.49291788243877,0.401594699964448,3.71747406  
669194,0.000201224635245941,0.00170142148223129,9.51927917297739  
"Bmerb1",8.86448024506338,0.304844482545898,0.651131537730029,0.468176  
497192326,0.639658378050369,0.753507676125308,0.0862758885314548  
"Proca1",435.38167033531,-1.34576302209284,0.563601960726539,-2.387789  
81598647,0.0169500325249945,0.0505957951886624,-4.01560452452188  
"Pheta1",1207.00012755875,0.546147234408621,0.220566718020637,2.476108  
99463772,0.0132823022783362,0.0421308491659346,1.72963466354856  
"Prss53",168.523851463925,-0.116007912025158,0.176683591338605,-0.6565  
85657707371,0.511447373404025,0.645658846657927,-0.0507516072223021  
"E130201H02Rik",0.896747081904376,1.00357229902447,2.18830277932958,0.  
458607606088191,0.646515973627545,NA,NA  
"1810024B03Rik",161.976432684496,1.07659446545976,0.180892205807232,5.  
95158017259755,2.6556587586949e-09,3.09850777959792e-07,16.13510967594  
08  
"Arf6",1969.12897241191,-0.754486388462145,0.188542167634188,-4.001685  
12927044,6.28929581371886e-05,0.000690088293617841,-5.4916732904482



"1810030007Rik",1668.58294381288,-0.102197418376172,0.096965796309454,-1.05395327286358,0.29190431091646,0.435766806082929,-0.0848900839539085  
"Nkrf",268.245079213569,-0.448786733047173,0.166125282039747,-2.70149568769308,0.00690283754882235,0.0254956481392192,-1.64670959942847  
"Bclaf3",602.662237109003,-0.142910802626808,0.162075745924157,-0.881753169247682,0.37791030151622,0.523058907526772,-0.0926149444376904  
"Lsm8",937.800174595875,-0.0575536516585179,0.131336933308377,-0.438213762182057,0.661231333205739,0.769988565148441,-0.0150433512951531  
"Hepacam2",898.867969665478,0.258758747646879,0.395828870170681,0.653713680700708,0.51329628761126,0.647210449295633,0.112581730923832  
"Tnip3",130.928887270895,-1.58296668747917,0.648290429536489,-2.44175544687734,0.0146160438827402,0.0453795579021764,-4.89563085126262  
"Rnf182",44.873177223763,-0.0872352284209994,0.545079320975587,-0.160041346394989,0.872848504251174,0.920379906001015,-0.00723779810845446  
"Bcl2l15",27.2041962336797,1.41976308289209,0.529064734244496,2.68353377383867,0.00728486167663828,0.0265733039396239,5.15068491408903  
"Foxo1",3136.10794604765,0.287485153862664,0.153107301771682,1.87767108776674,0.0604261742657845,0.134281917692531,0.577216666601907  
"Ptx4",0.102773349507105,-0.0520891204135723,4.78471990596623,-0.0108865558355089,0.991313956752974,NA,NA  
"Spink10",3.96741617131925,1.49878912579832,1.68065646539963,0.891787915409547,0.372506620233803,0.517722865586905,0.986675645737177  
"Wfikkn2",29.1454261834523,-1.20498992988663,0.411675754734263,-2.92703642619044,0.00342208797867952,0.0149538035428717,-5.06431913810678  
"Nkx2-6",0.200004388940312,0.914187463617524,4.78471990596588,0.1910639455567,0.848475494505895,NA,NA  
"Gpr146",1460.40678968606,0.00531511257167751,0.207946187121438,0.0255600386102466,0.979608260217061,0.986845872266198,7.03795822466594e-05  
"S1pr4",138.12998886091,-1.15922747901898,0.354557356509931,-3.26950621030624,0.00107735372349453,0.00622960940115548,-5.88706910500543  
"Cdc25c",29.899205156336,-1.13401658833971,0.570506036752833,-1.98773810491862,0.046840662294344,0.110662696403141,-2.49627496632564  
"Olfr983",0.269684169908007,-0.0732154415645561,3.95821540425547,-0.018497083682167,0.985242304053111,NA,NA  
"Vsig4",1.25899251207904,0.289535881473444,1.33914334358136,0.216209775347214,0.828824234128403,NA,NA  
"Gm7887",1.14178204665377,-0.924090359800087,4.10760405534803,-0.224970651345262,0.822002105876644,NA,NA  
"Olfr1094",0.28006539364761,0.957602240392341,4.7847199059617,0.200137575284016,0.841372986982997,NA,NA  
"Kcnj4",4.79360905678649,-1.34203736081884,0.952367756593488,-1.40915875356717,0.1587882309867,0.279766626857931,-1.70948651765453  
"Aqp5",20.3638109847872,-1.52870524454778,0.919807612722596,-1.66198368376499,0.0965160460222912,0.19204713392618,-2.52238574005843  
"Nkx2-3",0.369870519760414,-1.96936337674366,4.73729535352032,-0.415714712674652,0.677618773975231,NA,NA  
"Grsf1",4385.19169638081,0.531578144620382,0.289972062390702,1.83320468957504,0.0667721367591031,0.144722445812471,1.02750734997393  
"Dnajc21",2139.04996231806,0.452276048391401,0.145032082419044,3.11845

517796974,0.0018180179202813,0.00928076027956245,2.1165667921279  
"Nxpe4",305.697858207121,-0.932129462190248,0.253502735125853,-3.67699  
962577322,0.000235993386601394,0.00192519681799471,-5.82835112410854  
"Nhllrc1",120.6830450961,0.318073662758028,0.292502459147555,1.08742218  
333821,0.27685027181191,0.420374316625545,0.275645732451228  
"Bhlha9",5.09288033273263,-0.220091082912506,0.892468810648502,-0.2466  
09271143694,0.805210628788352,0.876115895095719,-0.0291085635643271  
"Il20rb",208.261447826084,-0.728792404734569,0.345848132164997,-2.1072  
6135825096,0.0350949309074723,0.0885800599137727,-1.76648238002039  
"Defb29",1196.79900090289,2.0430969981524,0.70361948106674,2.903695894  
05756,0.00368786179884317,0.0158069750173322,8.4733443110838  
"Pced1b",587.158542513363,-0.598130444614099,0.276609833281597,-2.1623  
6146603358,0.0305903253284789,0.0798247006497165,-1.51202728354881  
"Osbpl1a",2320.31648139687,0.64109067437266,0.284885445359241,2.250345  
48031839,0.0244270229820351,0.0671665624176732,1.73131648566165  
"Pcsk9",112.166927466296,-0.269282565138756,0.366593858111586,-0.73455  
2855102091,0.462611859138832,0.601895504436738,-0.136707064759199  
"Ctla2a",1002.99627825653,-0.713547151684819,0.192667737003169,-3.7035  
1135474791,0.000212635659227843,0.00177329772610115,-4.5202600861605  
"Gm4895",0.0892211881005411,0.881785905194793,4.78471990596623,0.18429  
2063595042,0.8537843396306,NA,NA  
"Crb3",1200.69046920294,0.887545852596833,0.251986604465232,3.52219458  
046348,0.000427989881991254,0.00305563775872042,5.13957118907623  
"Gm1821",520.080168031423,-0.240190837692874,0.346432196664041,-0.6933  
27121456336,0.488104286406401,0.624724785109099,-0.112996355273193  
"Nrn1l",37.2018759387314,0.224466309329835,0.356786507217657,0.6291334  
02718338,0.529261724060318,0.661636538804134,0.0927133194812306  
"Cnr1",93.398068451359,-2.02915320292814,0.462215693921968,-4.39005691  
414429,1.13320997317169e-05,0.000188365968089528,-17.4042983293106  
"Olfr794",0.646137397889329,0.638357416071215,2.05253328112976,0.31100  
953243489,0.755793374926419,NA,NA  
"Krt84",0.0907556969386152,-0.0576292604836612,4.78471990596623,-0.012  
0444376298394,0.9903901615196,NA,NA  
"Zfp879",46.1445589649669,-0.0813916157423307,0.267434167822916,-0.304  
34262160632,0.760866876855693,0.845194957606807,-0.0136890897456749  
"Cdkn2a",45.7286393289024,-1.70928717339989,0.378072533482802,-4.52105  
620488732,6.15318467667853e-06,0.000116256100862452,-15.4856547028498  
"Ubr3",4081.6622081342,0.33821377894588,0.182200928575143,1.8562681408  
4207,0.0634153477919113,0.139148373986798,0.667030110956756  
"Apol7c",146.039431705147,-1.71901527519674,0.572016658215678,-3.00518  
394089948,0.00265420283559416,0.0123394484712482,-7.55499298396477  
"Mab21l3",292.37063878368,-0.710764541178622,0.278899599014045,-2.5484  
6024767081,0.0108199617492234,0.0360443557468577,-2.36187412050876  
"Gpr4",431.106104734686,-1.13748460713609,0.313594288297285,-3.6272491  
2278299,0.000286456881706213,0.0022789640187784,-6.94627435693019  
"1700001022Rik",84.9712275084542,0.37711518577377,0.32543568237699,1.1  
5880097418732,0.246537320335371,0.385669501917448,0.359305728391769  
"Dsc1",0.160338031895853,-0.343793665344574,4.78471990596465,-0.071852  
4118655304,0.942719361935952,NA,NA  
"Trp53i13",762.431226218269,0.0154116572929786,0.145304505148877,0.106

064552349481,0.915531135585065,0.948362433280434,0.000817103510141836  
"Ackr3",2170.40079020104,-0.0776042324230949,0.270298550090133,-0.2871  
05618573305,0.774031450209582,0.85386507588042,-0.0122600787105864  
"Aplnr",722.24497183475,-0.907571451813576,0.312374436898921,-2.905396  
03952052,0.00366788672877964,0.015744719124635,-3.76755622858417  
"Alkbh2",277.997649656417,0.181454237701114,0.177269971676273,1.023603  
91884353,0.306022393491833,0.450496385677897,0.144692557219209  
"Phlpp1",776.943812267977,-0.0993915521739323,0.180197045877323,-0.551  
571484926548,0.581241977495398,0.705625806438283,-0.0346548724948562  
"Marveld1",2573.78048166786,-0.809552375366587,0.175221205394272,-4.62  
017353176508,3.83419219591152e-06,8.11716389097534e-05,-7.625129011872  
83  
"Slc25a53",202.332012192386,0.362590800887506,0.267882849468625,1.3535  
4242202046,0.1758824070805,0.302252350895081,0.433837359308929  
"Snhg11",6486.48328190718,1.26815803275794,0.344058290792928,3.6858813  
3666334,0.000227912534025798,0.00187551751242224,7.96260025273579  
"Lacc1",857.143605209665,-1.09178606122025,0.204232462985033,-5.345800  
78633365,9.00181732919984e-08,4.20905118188821e-06,-13.5144262598055  
"Sowaha",96.6646071540085,-0.0658663661413635,0.560842272551962,-0.117  
441871565166,0.906509904919368,0.942925053407193,-0.00387086597594815  
"P2ry4",0.284242492515149,-0.56569161680078,4.76354477898689,-0.118754  
34010743,0.905469983925661,NA,NA  
"BC024139",3.54186224753361,-2.02450379869527,1.24349937622952,-1.6280  
6981442473,0.103510083205483,0.202573482117887,-3.23242922069966  
"Ccdc89",21.2784866327483,-0.791357109786397,0.424882217243212,-1.8625  
3290363858,0.0625280119656397,0.137669438419858,-1.56918188724206  
"Tmem74b",13.2807590838216,0.0102668689609288,0.542367656289622,0.0189  
297220102784,0.984897169050344,0.99028078600163,0.0001002739818778  
"Cxxc4",60.846004807796,-0.714798880361747,0.335442346464817,-2.130914  
26259958,0.0330962061631724,0.084813450231217,-1.76362409063209  
"Slc16a13",1756.46954732325,1.21334198890888,0.295419254841523,4.10718  
654598115,4.00507755323043e-05,0.000488068763330543,9.25179849356906  
"Pcare",0.120701025406302,-0.999956691173237,4.78169649435351,-0.20912  
1740025541,0.834353203805696,NA,NA  
"Gm13080",0.714738378865713,-1.21489295084536,2.39605713453199,-0.5070  
38389584419,0.612127882653407,NA,NA  
"Slc15a5",12.0070103917329,-5.12597944650476,1.95311018281028,-2.62452  
138728247,0.00867708429019589,0.0302874667902326,-17.9256592530663  
"Tigd3",87.3876091995312,-0.0116403177194201,0.263404087069858,-0.0441  
918644805726,0.964751466923839,0.978756652379469,-0.000249943636248211  
"Dsg2",1138.56703570667,-0.661789065083393,0.262343596264487,-2.522604  
22783942,0.0116489423275365,0.038173290336522,-2.16115108640466  
"Sowahd",14.4329124966264,0.106658892752367,0.705996831684905,0.151075  
596894421,0.879916082389448,0.925033901678409,0.00831138266424265  
"Adig",891.400171970094,-3.480807123825,1.29215362526237,-2.6938028542  
2194,0.00706419349780238,0.0259344087403786,-12.712550414033  
"Sptssa",2639.58437372051,-0.0990581684670518,0.211002285875695,-0.469  
464906770767,0.638737363329327,0.752786575809673,-0.0281298971029434  
"Gm9493",2.62754603663521,0.320647954077004,1.09199266364337,0.2936356  
30304676,0.769036346320485,0.850568420248274,0.0518970070957171

"Cryga",7.56575607957508,1.23396020259442,0.628571887785071,1.96311706  
993862,0.0496325725254473,0.115699150130461,2.66135846245892  
"Camsap3",1676.17861792098,1.07249122922835,0.260604131025244,4.115403  
79275286,3.86502187025102e-05,0.000474859460782321,8.20723019754519  
"Gm9791",0.504352279450406,-0.596897586243271,2.37996101471222,-0.2508  
01413364936,0.801967648788831,NA,NA  
"Olfr1442",8.18116087772692,0.783412409126098,0.782482016611259,1.0011  
8902734515,0.316735430341305,0.461907810081882,0.605099873934654  
"N6amt1",1807.39072904987,0.826984416010872,0.146637554155547,5.639649  
54798441,1.70396606688235e-08,1.23051593970637e-06,11.2536676219196  
"Pfn3",3.58478303946646,1.42401532770964,0.978188209038,1.455768240255  
2,0.145456698220383,0.261827428166638,1.90827974082314  
"Dock5",1441.35817431037,0.161434478683249,0.0912765862880917,1.768629  
66997606,0.0769556960281216,0.161238143257717,0.29459739820296  
"Zfp507",874.044346272083,0.306632984415575,0.363125072342049,0.844428  
016049356,0.398430272410402,0.542834139039722,0.187337869106252  
"Ffar1",20.7541716180358,-1.74128862954219,0.867357491400986,-2.007578  
93579682,0.0446880547954715,0.106662711764243,-3.89714961128105  
"Rin3",1234.00788666249,-0.454678707111658,0.222730683314997,-2.041383  
34397613,0.0412127387013982,0.100120356242196,-1.04638950794243  
"Stk-  
ps2",0.297298717109934,0.875696148334188,4.78471990596018,0.1830193126  
3382,0.854782865263828,NA,NA  
"Shisa2",83.5145530224837,-0.667906229806935,0.321465144972736,-2.0776  
9408364189,0.0377375443236334,0.0937754591947663,-1.5808352534409  
"Fam160a2",2214.47817343561,0.544949511668592,0.146615380286137,3.7168  
6456499352,0.000201710500824789,0.00170479035330808,3.47367883054609  
"Tent5c",489.22784692975,-0.180887735448015,0.304417369954067,-0.59420  
9638810391,0.552371906734896,0.682302656795502,-0.0691501146620066  
"Tnfaip8l1",129.569433044004,-0.822463944711515,0.222350317255306,-3.6  
9895557093877,0.000216488489168532,0.00180157599735725,-5.197226520185  
19  
"Ascc1",2631.95035873024,1.35637466276933,0.283109150132196,4.79099549  
462099,1.65955853515917e-06,4.05489628051798e-05,13.7170174473208  
"Zfand3",4625.65325034511,-0.244120895622238,0.154059004695783,-1.5845  
9348808788,0.113058725449449,0.216416554959097,-0.373639293742285  
"Klkb1b1",11.5916211623036,1.96029159722539,0.773237627559316,2.535173  
57065634,0.0112391622378908,0.0371362794974402,6.45555564677144  
"2510039018Rik",2702.65254162216,0.13071238318586,0.147677130200175,0.  
885122720144146,0.376090446725164,0.521254729190165,0.08516126565831  
"Hs3st5",1.77446108794787,1.50045568071759,1.26751130947807,1.18378090  
15964,0.236499804220869,0.37465489342245,1.47307230593672  
"Zfp758",539.996843761172,-0.127423828893174,0.128022148561232,-0.9953  
26436286357,0.319577524211833,0.464665729102311,-0.0976623363866692  
"Bod1",3613.17214980389,0.682585105828508,0.158204984322328,4.31456131  
898982,1.59920142351911e-05,0.000242090290029313,5.68333997306378  
"Lingo4",63.5338491681555,1.03793085374328,0.41110807845926,2.52471529  
538706,0.0115792054412088,0.0380022467080776,3.3941480611314  
"Foxe3",0.334388967438133,-0.954088314838287,4.78136783357248,-0.19954  
2965119549,0.8418380377479,NA,NA

"Zfp488",762.499664750199,0.343736631003687,0.16882989297714,2.0359938  
9268244,0.0417509685430476,0.101163214198129,0.78750752533061  
"Znrf4",0.278522765516491,-0.0433012352174915,4.7847199059559,-0.00904  
989969498344,0.992779323319753,NA,NA  
"Tram1l1",29.445847775672,-0.90289041449147,0.389151114258692,-2.32015  
374338942,0.0203325618875534,0.058197928902454,-2.56773502537241  
"Rps2",39856.0405438345,0.149832376911221,0.151857947762505,0.98666141  
034349,0.32380865393052,0.468717233432612,0.113536323587438  
"Ackr2",37.6719135242556,-0.989757981214537,0.463360844535999,-2.13604  
14736935,0.0326760334810432,0.08398593472362,-2.45173537237571  
"Prop1",0.127971505821787,0,4.78471990596577,0,1,NA,NA  
"Dact1",448.615794133464,-1.06089983696798,0.202498301888193,-5.239055  
47392563,1.61400521012288e-07,6.55622366395332e-06,-12.6619411690531  
"Tceal3",152.654036366958,-1.33547540554163,0.309556807550111,-4.31415  
292110945,1.60216021875997e-05,0.000242350038366034,-11.1180029406001  
"9930012K11Rik",198.918140615787,-0.385174865083795,0.279883607887684,  
-1.37619658396845,0.168760779419601,0.292827060347369,-0.4730614011381  
83  
"Tex38",28.7717986307484,1.28190628892683,0.431396949790787,2.97152376  
610107,0.00296325938175729,0.0134117064590306,5.52710219888653  
"Rasip1",1427.09600048689,-0.542654727606724,0.252734852249998,-2.1471  
3057093505,0.0317828881152602,0.0821420489653091,-1.35625979660573  
"Cage1",58.5661662686413,0.193631426867022,0.277845279027898,0.6969037  
85964922,0.485863008292999,0.622960277220813,0.0916404338688482  
"Acp1",3262.45215328681,0.404451514785052,0.148024959831762,2.73231970  
638418,0.00628900815232539,0.0237090257065043,1.51341690955943  
"Garem2",3.84611080329158,-2.27280077440436,1.31102354847775,-1.733607  
89517728,0.0829876786609727,0.170908323241829,-4.01519345838522  
"4932415D10Rik",1.03526408421962,2.5845405426995,2.87227967302261,0.89  
9822035776789,0.368214965587567,NA,NA  
"Tlr7",271.810913785242,-1.06300939797285,0.359641147123697,-2.9557502  
1510882,0.00311909583089038,0.013926295056263,-4.54327718116383  
"Dnd1",136.803108951162,0.092531087218749,0.221200682053093,0.41831284  
7681634,0.675718397424353,0.781305658126077,0.0228356394998622  
"Smim7",3531.72307476968,-0.195695650879939,0.23886534716809,-0.819271  
833273615,0.412631339073526,0.556088322453388,-0.114839715597482  
"Gm9294",0.416589745726892,3.07716016992034,2.95889286082329,1.0399701  
2215716,0.298353781944426,NA,NA  
"Zbtb39",695.944738425095,-0.306203296421521,0.139937885480393,-2.1881  
3722510065,0.028659608075751,0.0760382417010469,-0.78893857587061  
"Gm4922",0.157863633167365,0,4.78471990595081,0,1,NA,NA  
"Liph",114.433256947439,-1.42304259380149,0.431085385415375,-3.3010689  
8063897,0.000963171987909208,0.00570471671332131,-7.35209541803307  
"Swi5",6647.64350578252,0.0339140354584755,0.262014939383531,0.1294355  
0294601,0.897013056664171,0.936594226134626,0.0022215438766988  
"Rnf208",484.029264544468,1.10009121455394,0.220280252413476,4.9940528  
145438,5.91252175074411e-07,1.795675219564e-05,12.0212955326457  
"Cnrip1",349.047575382075,-0.739330379937787,0.204894495469457,-3.6083  
4671641043,0.000308154494081748,0.00235757766721658,-4.47303796132233  
"Csrrnp2",414.408368156229,0.179690405409567,0.156948269005174,1.144902

11678374,0.252249707031142,0.392415834268372,0.168088370894702  
"Pard6b",1747.32025821618,0.480189815934691,0.383174106322912,1.253189  
62845058,0.210136703559127,0.343959490093676,0.512473644675203  
"Gm7334",12.1700885747321,-2.36996422095944,1.27371533444931,-1.860670  
24307601,0.0627907585340667,0.138135418018417,-4.69139343506398  
"Zbtb7c",706.839894024297,-0.838117304385962,0.267789511798062,-3.1297  
6150095818,0.00174948280455446,0.00902896128194888,-3.9452846293432  
"Csrnp3",92.3463216734913,1.58877266780179,0.484426265857626,3.2796996  
7728532,0.00103917643395407,0.00605735788019025,8.11303834282599  
"Prss42",0.901305357286799,-0.76931009978386,1.49343956692267,-0.51512  
6367897882,0.606464718152209,NA,NA  
"Plppr4",242.739654229849,0.649046167791056,0.445293071665988,1.457570  
7754957,0.144958889856484,0.261201090504158,0.871321573220575  
"Fzd1",2997.66812524299,-0.672784045589434,0.242386438319702,-2.775667  
03093367,0.00550885942702385,0.0213627170063864,-2.58760014866017  
"Zfp612",1108.22660657562,0.702635587985407,0.206122400680263,3.408826  
91869738,0.000652428595845728,0.00423752590333112,3.83904324696215  
"Ly6k",35.8146727984031,-2.11251882045555,0.887222412464681,-2.3810476  
2771607,0.0172634797553359,0.0514121255189118,-6.26970495378367  
"Cnpy1",38.8758060725828,0.981212944021756,0.743795427232731,1.3191973  
3315964,0.187103149634196,0.315913884789154,1.13063756459707  
"Tmem201",1290.93740987239,0.116977009138841,0.134309647478207,0.87095  
016132644,0.383781366262159,0.528420950454034,0.0746151958191904  
"Il27",21.5601298650185,-1.07353510402289,0.625405218061472,-1.7165432  
4751311,0.0860626595709127,0.175798598953227,-1.86625088406989  
"Palb2",164.057236731805,-0.143155695059074,0.485284627021727,-0.29499  
326186705,0.767999027046766,0.849936453053083,-0.0232762131918362  
"Phf11a",192.986864870697,-1.33451943542322,0.460997646633566,-2.89485  
086348823,0.00379338710454179,0.0161351356379485,-5.50723615006672  
"Ccnjl",88.40757372451,-1.59164763939017,0.328836618107539,-4.84023843  
983719,1.29683437434672e-06,3.37512266435095e-05,-16.3883900448976  
"Kcnj10",1233.28743760465,1.5232618490622,0.597537692078835,2.54923140  
28974,0.0107960638406476,0.0359954946588488,5.06387304044954  
"Gemin7",1544.12831169952,0.286941926820496,0.186690286197053,1.536994  
4128621,0.124294677571621,0.232670662758398,0.418399001868538  
"Slc38a6",2348.31747395029,0.273112306174716,0.201364091361425,1.35631  
08711598,0.175000278021809,0.30122953181074,0.327702742446981  
"Gskip",886.585841502831,-0.316051351285025,0.127062368182849,-2.48737  
179862893,0.0128690827035775,0.0410404603458218,-1.00921418289475  
"Dok7",38.500512197153,0.388072422226237,0.391752617800753,0.990605817  
530519,0.321878095902225,0.467066987713149,0.295432778296203  
"E230025N22Rik",11.2606574868198,-0.809345528519717,0.669335358507456,  
-1.20917790795405,0.226594503214387,0.362742831626959,-0.8207258562705  
37  
"Gpr152",6.68683753241232,-1.83546221862421,0.898182850714168,-2.04352  
846100856,0.0410001529189352,0.0998153304549131,-4.22970061666949  
"Erich5",3.45381236742462,1.36708057767423,0.890211061754541,1.5356814  
09058,0.124616536850628,0.233049418330475,1.99115935784051  
"9930104L06Rik",892.871941722757,-0.37714308919154,0.164874269624639,-  
2.28745874083424,0.0221690610400059,0.0623830786777362,-1.046368873624

"Serp1b1a", 712.413169670273, 0.405500842425654, 0.357346681505483, 1.13475474493649, 0.256478092548475, 0.39733114957176, 0.374271282668601  
"Klk14", 2.54955387730979, 1.73951190474006, 0.82984410990346, 2.09619118094653, 0.03606523496372, 0.0905135733456832, 4.17875196707358  
"Defb1", 7423.26768421121, 1.25301855744743, 0.515417339264397, 2.43107567788802, 0.0150540698485311, 0.0462785048340853, 3.85062336669792  
"Abca6", 30.5175355021392, -1.27998141921889, 0.417347384571728, -3.06694486784042, 0.00216258740265288, 0.0106131711998303, -5.81835967657759  
"Atp5pb-ps", 0.646247531394873, -0.581504373329052, 2.3843727621574, -0.243881486384244, 0.807322608045648, NA, NA  
"Gm6430", 1.69253976084293, -3.05930215834364, 1.71387363987059, -1.78502200347433, 0.0742577479118949, 0.157104770918633, -5.66228604355251  
"Trmt10c", 901.250554486894, 0.184738891534319, 0.180556313638369, 1.02316494954769, 0.306229862146651, 0.450733739875851, 0.147214449121553  
"D1Ert622e", 1679.13618383922, 0.4869279389037, 0.215606372644831, 2.25841162731223, 0.0239200084929913, 0.0660425269890038, 1.32320544203348  
"Scml4", 203.560900551044, -0.951195574379443, 0.425088903911235, -2.23763915178098, 0.0252445962272636, 0.0689962345443211, -2.54321479153137  
"Hjup", 4464.68806920673, -0.159619834837149, 0.206645900365446, -0.772431655091471, 0.439858811356887, 0.581685234931944, -0.0864861464629835  
"Zfp36", 3464.05648995, 0.408594013153908, 0.19611513165589, 2.0834395067018, 0.0372111803395302, 0.0927212261035349, 0.971701062425542  
"Spata32", 0.399909702550995, -0.0536751919318006, 3.10742130121542, -0.0172732264887308, 0.986218644583664, NA, NA  
"Fads6", 787.329796625392, 1.40532886817881, 0.338509465229932, 4.15152015682706, 3.30274169668087e-05, 0.000419551884686937, 10.9282917025815  
"Setd2", 2461.42194423127, 0.143449566949388, 0.147172202577754, 0.974705579157181, 0.329706324686071, 0.474471467911212, 0.106949368828111  
"Isca1", 4803.50348734685, -0.267977902459896, 0.409670266577847, -0.654130710286668, 0.513027597505274, 0.647025361976574, -0.116669482020956  
"Cyb5d1", 207.914542457368, -0.961020761524412, 0.398939194454692, -2.40894044727299, 0.0159989083744252, 0.0485067198700889, -2.90809969755794  
"Olfr923", 0.127104318644313, 0.478471990596583, 0, 1, NA, NA  
"Zfp354c", 407.330372807397, -0.421257545270598, 0.220180788775628, -1.9132347904334, 0.0557180015427601, 0.126280320130273, -0.871687630598905  
"Cd300c2", 778.661029425667, -1.06329124261621, 0.402493346595346, -2.64176104179235, 0.00824762227483322, 0.0291206099561982, -3.76012650739504  
"Shb", 2272.00106087297, 0.637845174728889, 0.141262984525141, 4.51530297815115, 6.32263053200689e-06, 0.00011888008689785, 5.76445894979417  
"Olfr543", 0.818769352751442, 1.56174839061987, 3.46271412104471, 0.451018575610476, 0.651976161055736, NA, NA  
"D630023F18Rik", 918.761724982158, 1.0293079301951, 0.582489251397515, 1.76708484787587, 0.0772140196770378, 0.161727248433009, 1.87523849153058  
"Oxgr1", 838.807513723917, 1.20287577179346, 0.514448671336391, 2.3381842325858, 0.0193776930894471, 0.0560739477379103, 3.46558609681552  
"AY074887", 6.82335984656125, 0.342851787890628, 0.662010687100991, 0.517894642142424, 0.604531780448425, 0.725586502318834, 0.109978276243792  
"Olfr545", 1.75629213218718, 0.78122419126371, 1.22512306481633, 0.6376699

72673995,0.523688535945131,0.656648171952293,0.328588293772231  
"Tlr1",494.158523527256,-1.161452946692,0.48778747536971,-2.3810634863  
3018,0.0172627365562381,0.0514121255189118,-3.44705439920821  
"Ankrd45",189.867028410608,0.671642292014994,0.498700056675216,1.34678  
607516664,0.178049140726403,0.304927724715275,0.797696452263065  
"Lsm11",466.083733351578,-0.364547823939728,0.159786635504458,-2.28146  
629903573,0.0225208687369918,0.0631089247821021,-1.00720666035985  
"1700056E22Rik",55.0213119605039,-1.47980102257951,0.509589087700709,-  
2.90391034324624,0.00368533678836277,0.0158031002198147,-6.13754746116  
511  
"Lemd2",3198.50724876723,-0.10567961537301,0.0843811048261597,-1.25240  
852902708,0.21042104004338,0.3442226225997,-0.11270378772682  
"Gm1123",11.2279121447665,1.66986689480791,0.581255034938275,2.8728643  
9589335,0.0040676867291708,0.0170050934488363,6.80344244701124  
"Defb36",69.8529010712739,-2.23400733426306,0.775411341449766,-2.88106  
094771092,0.00396338992249298,0.01669796385237,-9.14260462636998  
"Ankrd50",1319.81498010079,-0.960173850201653,0.202083977859592,-4.751  
36059954631,2.02052432975474e-06,4.81027880116703e-05,-9.5462120512556  
2  
"Zfp444",2373.01456545162,0.987011269666609,0.299139494571304,3.299501  
69595991,0.000968566423088834,0.00573318400649243,5.09444310277158  
"Coa4",407.538006632769,0.282526898952828,0.182566912749204,1.54752520  
431203,0.121736651632628,0.22913613606844,0.416286143389646  
"Uqcrq",12373.3763677252,0.702964536630767,0.419794535929246,1.6745442  
7455732,0.0940236806351399,0.188298451625304,1.17375891343808  
"Psg22",0.169759183421915,-0.0613667411439099,4.78471990596551,-0.0128  
255660414728,0.989766959420302,NA,NA  
"4930503L19Rik",819.754607396217,-0.497553955546164,0.214829766239851,  
-2.31603824858544,0.0205561804066811,0.0586485814412449,-1.41115849406  
754  
"Syt16",116.97966480278,-2.91193301954061,0.900276403932906,-3.2344877  
7155513,0.00121861138939546,0.00683754960300222,-14.5169349753174  
"1700029I15Rik",232.710193611694,-0.442571617003876,0.339567567675369,  
-1.30333889079472,0.192459089256997,0.322440911009875,-0.5009182148435  
38  
"Rassf9",372.034268970816,-0.341149742554047,0.233611433477197,-1.4603  
2981980459,0.144199450362213,0.260116651231606,-0.459400802770551  
"Olfr1030",0.441167619032422,-2.46820375865554,3.0341679188362,-0.8134  
69730311517,0.415948794277982,NA,NA  
"H1f10",294.00059054177,-1.47077474420572,0.349764934583358,-4.2050377  
2328612,2.61038614590215e-05,0.000351015924640001,-11.6995409217262  
"Sstr3",2.50438705865419,1.06195003256772,1.2818653298849,0.8284411847  
40581,0.407420690633804,0.551225184893259,0.632510044001902  
"Zfp367",1157.59785630108,0.204927804467719,0.127071963912897,1.612690  
93635941,0.106811670662149,0.207060444876774,0.322708937922624  
"Ttc41",343.36408592973,1.16097333884798,0.342442833687535,3.390269045  
33597,0.000698240606885694,0.00445348228755553,6.28558970830113  
"Klhl31",28.9571007187884,0.379573180075441,0.567983999977843,0.668281  
465833982,0.503953941919371,0.638804704170062,0.170108187343192  
"Cfap43",20.124856668097,-0.996048383502679,0.464353794341408,-2.14502



044699639,0.031951212206344,0.0824846997539215,-2.48528261425954  
"Ubt2",75.3609483992129,-1.65030829669545,0.338180587339949,-4.879961  
64911889,1.06106471809455e-06,2.92399786079693e-05,-17.2291751396078  
"Pwp2a",1282.19240708455,0.179738630245549,0.157422887883337,1.141756  
65725781,0.253555183028284,0.39392979750482,0.167441374100582  
"Mylk4",44.4827684047033,1.11363067893169,0.410662713978414,2.71178911  
799191,0.00669211524695224,0.0248965584974384,4.11266671539601  
"Kctd21",327.626091412641,-0.745256158418254,0.29475861916165,-2.52836  
08687607,0.0114596496392243,0.0376980897343412,-2.44305838736876  
"Pp2d1",2.70842813733147,0.691763508935058,1.2087738377209,0.572285308  
75499,0.567128701018361,0.69419771564166,0.252492619730399  
"Fbxo48",15.52204536412,-0.871966181173697,0.586302796241917,-1.487228  
41979064,0.136954492411929,0.250008303814978,-1.20877283794599  
"Napepld",532.369498023353,-0.966904889243925,0.218653395459912,-4.422  
08952305612,9.77509362737038e-06,0.000168055436579517,-8.4035798756046  
"Wdr72",869.28747522497,1.3758861118023,0.38733548077506,3.55218197168  
291,0.000382050545908261,0.00278997061577501,8.0925826611238  
"Sft2d3",409.625191881271,0.0856504219248278,0.168923388760114,0.50703  
708085361,0.612128800911147,0.731687552732071,0.0267573371300859  
"Tst",3324.11951011547,0.50649746961513,0.53282698447097,0.95058524507  
3534,0.341814961663556,0.486329899419402,0.365117858434211  
"Shld1",376.048805284392,0.300579734322583,0.150131201728275,2.0021136  
9030808,0.0452725054508478,0.107622934806222,0.670028749808992  
"Spata21",0.241348162149924,1.82494259336562,4.03034767703832,0.452800  
289107234,0.650692555428154,NA,NA  
"Fzd5",634.35881870967,-0.0178641559385998,0.254895588505026,-0.070084  
2099440554,0.944126634435912,0.965564196694897,-0.000626008055491731  
"Tubg2",59.1762565889174,-0.341655032505501,0.341089678501848,-1.00165  
74937305,0.316509042707556,0.461719405451449,-0.264030298449868  
"Prtr3",2.14138101792142,-0.00403574121278949,1.379761041697,-0.002924  
95663439361,0.997666225588118,0.998383086969673,-6.53072378415981e-06  
"Gm4779",6.81035874745609,-3.27476207194423,1.52310911942946,-2.150050  
85989566,NA,NA,NA  
"Acer1",3.12255080227198,-1.27308558013821,1.25809097195673,-1.0119185  
4048373,0.311577003629302,0.456673563614532,-0.997827222484252  
"Prss22",175.1889151056,-2.54047152412051,0.687901558017058,-3.6930742  
4080222,0.000221559306586662,0.00183515860655342,-16.0065567888526  
"Olfr1443",7.18976109647,3.67831379797301,0.748613733106791,4.91350029  
434779,8.94645983497827e-07,2.53543712009311e-05,38.9259742913697  
"Cetn4",528.991906545882,1.18435663565403,0.23489936392817,5.041974639  
0467,4.60752363898198e-07,1.48916463357915e-05,13.1637807205182  
"Ankrd34b",22.4462463257371,1.0304723821553,0.533871169432776,1.930189  
23132739,0.0535833953561908,0.122553553390617,2.16317501722197  
"Tmem232",2.13290985061939,1.51319547032069,1.42455047838652,1.0622266  
4151191,0.288132808016588,0.432188129141275,1.26941105697205  
"Prkce",2186.74441384913,-0.0476686545237325,0.284192464126767,-0.1677  
33703531524,0.866792780230339,0.916273245901195,-0.00416817839387885  
"Megf8",4503.77905637965,-0.323347962435759,0.117191625096388,-2.75913  
882216252,0.00579539101358681,0.022217564684018,-1.23094433709779  
"Lrfrn4",933.171380880366,-0.218113632757553,0.314499342039419,-0.69352

651532802,0.48797919178858,0.624646683396385,-0.102637534917299  
"Gm9795",0.850691894689445,0,4.78471990594274,0,1,NA,NA  
"PrLhr",0.285564750435065,-2.14258505567375,4.74570250051814,-0.451479  
007679014,0.651644351481625,NA,NA  
"Kcng3",1.1061899473126,-0.781105102082558,1.66221994684164,-0.4699168  
14298087,0.638414450805715,NA,NA  
"Rpsa-  
ps2",2.66771968191952,-3.14030546581509,1.44544864692315,-2.1725472381  
8774,0.0298144106318168,0.0782927719505601,-7.99930008951786  
"Pcdhb7",56.0056523714925,-1.23528314879782,0.273973497991001,-4.50876  
875995645,6.52049306431034e-06,0.000121549501211257,-11.1363110064784  
"Zc2hc1c",327.805466744723,1.48170574658247,0.486806866712866,3.043724  
00617024,0.00233669404554775,0.0112635007416786,6.64721024929904  
"9930022D16Rik",1.20762726029114,-1.48532108677421,1.3736298892236,-1.  
08131098371319,0.279558803211821,NA,NA  
"E130308A19Rik",611.354853054444,0.218818252659251,0.212059720109359,1  
.03187089253162,0.302132603289985,0.446722005254968,0.176327859591609  
"Rnf216",1937.29393899142,-0.125376537332867,0.0924651730725766,-1.355  
93254375307,0.175120631803447,0.301365979497278,-0.150380364386584  
"Lingo2",8.52329527540409,-0.742884343972393,0.72621014957194,-1.02296  
056370223,0.306326492175655,0.450760277440248,-0.591944817996467  
"S1pr5",10.5213764282824,-2.30377593011325,0.675522944617529,-3.410359  
2608799,0.000648773582114524,0.00422222540189219,-12.5956482637352  
"Aqp12",0.209498224295285,-0.543373207678298,4.78471990595409,-0.11356  
4266740489,0.909583215051028,NA,NA  
"S1pr1",1378.43812992837,-1.33245631574049,0.384908008533035,-3.461752  
64271264,0.000536670152644619,0.00365618261225184,-7.47685966387915  
"Arhgef37",305.577989759034,0.259659406644925,0.222424297832888,1.1674  
0576085807,0.243046545763095,0.381893911619698,0.249951371680837  
"Magi1",1402.78037803111,0.490207894559187,0.147386502115623,3.3260026  
360801,0.000881010954077559,0.00534805466457168,2.56428847626093  
"Kmt5b",3093.48592656502,-0.0522082749843979,0.142203845001512,-0.3671  
36873013826,0.713516924141103,0.810023463575151,-0.0109998692330574  
"Slc25a26",754.585168201656,0.423058359118421,0.243606325303789,1.7366  
4767772695,0.0824493784239119,0.170152199461202,0.749262563106074  
"Poln",92.1888367420491,-3.56034014128829,1.34317609980147,-2.65068753  
219667,0.00803281189766548,0.0285805149962289,-12.6571163228767  
"Dmd",720.068413075198,-0.272817597045205,0.138350767662752,-1.9719268  
7582503,0.0486179547337546,0.113964039600715,-0.592524988099514  
"Gm5514",3.0475700459716,0.16300759097109,1.05203146041621,0.154945547  
832382,0.876864245251037,0.923069811786239,0.0130488247513971  
"Cc dc73",22.6149332007636,-0.102526740411051,0.413275817554332,-0.2480  
83086539591,0.804070121626854,0.875265700730259,-0.0136594100916587  
"Saysd1",520.921371810964,0.33297188146108,0.18412456557432,1.80840552  
384999,0.0705434088486715,0.151016182008278,0.629439483608885  
"Pr rt2",55.2522537323862,-1.84267010980829,0.642879390184494,-2.866276  
53326929,0.00415331270067661,0.0172520858623333,-7.48091306193551  
"Rpl18a",27326.1797994856,-0.233797822704145,0.22036293662807,-1.06096  
708585233,0.288704859499191,0.432680042314775,-0.195865705607413  
"Olfr620",8.49033851093553,0.136111947094036,0.706347654282502,0.19269

8236157231,0.847195304907923,0.902454387901199,0.013970139577674  
"Tubb2b",2025.34331244568,-0.364944363078564,0.42160948405715,-0.86559  
8087516207,0.386710604757177,0.531103991797945,-0.230935857051637  
"Pigw",318.213299772236,-0.241686633439187,0.195581101894604,-1.235736  
12735564,0.216556663953409,0.351868486146964,-0.252441155006743  
"Bola3",2064.52413837715,0.234181479563989,0.375026513532393,0.6244397  
95891288,0.532338796697924,0.66471609721525,0.0956386041176633  
"AI467606",333.728798417043,-1.19717013074006,0.325622584105951,-3.676  
55742929219,0.00023640265377075,0.00192642442812267,-7.48481495043006  
"Amer3",0.36620761869006,-1.41140293084187,4.76788395328713,-0.2960229  
20161219,0.76721257766305,NA,NA  
"Borcs6",890.525099459088,-0.213025164454199,0.198820831883806,-1.0714  
4287867528,0.283970341667164,0.427952830563175,-0.180803467704062  
"Sox3",0.315794374828854,-0.486056741965076,3.2162463809982,-0.1511254  
68756602,0.879876742070465,NA,NA  
"Shroom2",813.755156498808,0.454735398215163,0.231644027976672,1.96307  
844491876,0.0496370597415788,0.115699150130461,0.980756022499804  
"Cirbp",3380.01084265189,-0.190500681555877,0.154922486086872,-1.22965  
159137103,0.218827601679153,0.354259430217546,-0.197687468459574  
"Lrrc3b",44.8906401875828,0.119685864434641,0.31520353461168,0.3797097  
78896007,0.704160860405754,0.80365361648451,0.0261617654201906  
"Olfr835",0.200136460738522,-0.0674720501675185,4.78471990595068,-0.01  
41015673840395,0.988748949988819,NA,NA  
"Dpy19l4",1456.31370196169,-0.0600125602800865,0.0811177714605859,-0.7  
39820130650974,0.459409142458762,0.599087711320288,-0.0307472709453124  
"Vcpip1",1805.31874023242,-0.240908989222889,0.0778913339492819,-3.092  
88565246237,0.00198220496347579,0.00992527796041369,-1.11123377493617  
"Nudt18",1060.22760183173,-1.27012534671242,0.449198702754715,-2.82753  
565164673,0.00469077919650363,0.0189046739920273,-5.04029694876837  
"Asxl3",176.286875279936,-0.0379449148291503,0.30705673100109,-0.12357  
6235262583,0.901650809746308,0.939775885413669,-0.00235690482071212  
"Hs6st1",5064.64706823513,0.317473287227339,0.215589177520535,1.472584  
52802948,0.140863099234828,0.255421622698845,0.43330013875523  
"Olfr1152",245.790078617446,0.0133247948296798,0.317788399299359,0.041  
9297710648264,0.966554683383376,0.97966851466492,0.00027370480885592  
"Rln3",7.48715933831374,-1.56590816702872,0.860142664709694,-1.8205214  
4519215,0.0686796334763059,0.148001270283047,-2.99172145520845  
"1110012L19Rik",566.003291783032,-0.161846854697326,0.264062112459152,  
-0.612912065233749,0.539934485096895,0.670726059780292,-0.064640740700  
2105  
"Kcng4",20.1288387327482,-2.73352581917919,0.691365893200163,-3.953804  
84641262,7.69181540298555e-05,0.000805884023253155,-19.4724644811896  
"Med26",422.992752550084,0.0437531229860579,0.102168310754507,0.428245  
535851025,0.668472367013677,0.775825845954325,0.0111057331058262  
"Zfp688",716.495027224706,0.423042909205708,0.15696782599561,2.6950931  
2830477,0.00703689602750253,0.0258634116388774,1.54619052250697  
"Zfp574",1107.5796611345,-0.183077166320684,0.121121533966375,-1.51151  
624591799,0.130656972635244,0.240971128906701,-0.260533115106431  
"Morn2",793.894202384999,1.30066744124196,0.267118126117846,4.86925938  
027935,1.12017292366061e-06,3.01607735157191e-05,13.5386062532798

"Klhd9",131.558184831146,1.25615534687834,0.255896199715608,4.9088472  
133403,9.16133149448723e-07,2.5888063982538e-05,13.2671717848052  
"Zfp691",657.093607420336,0.164117827001321,0.171881854852728,0.954829  
275853117,0.339664039874835,0.484333000546989,0.11898256747859  
"Cenph",81.1628814265072,-0.513060317067604,0.406393013814954,-1.26247  
327002826,0.206778538734165,0.339746182543081,-0.553877580732429  
"Lca5l",112.906261219798,-0.425364723137933,0.266861349321099,-1.59395  
402976141,0.110946331585173,0.213243642337697,-0.657324574078416  
"Gpr20",17.4545036803021,-0.672063158792203,0.466253524470685,-1.44141  
142858955,0.149468483449557,0.267272238655491,-0.886778950415435  
"Tmem86b",518.029320906776,0.919724496717946,0.26299778472562,3.497080  
77456802,0.000470379383820953,0.00328843930646861,5.25837967901342  
"Dcaf12l1",207.508529853043,0.481729535471175,0.308372868532143,1.5621  
6575655378,0.118248945321972,0.223955117619019,0.720816535743265  
"Rtn4rl1",840.402465937945,-0.39217106846694,0.16139460239862,-2.42988  
961612445,0.0151034219151463,0.0463831344308587,-1.20428651258581  
"Ush1g",3.63173874677777,0.0900651293650688,0.836838575276184,0.107625  
451342685,0.914292807002888,0.947381684165506,0.00486831037941238  
"E330021D16Rik",9.85371161144721,0.303537520207811,0.703253679745143,0  
.431618815443401,0.666018481071225,0.773745716947575,0.077861013483564  
2  
"Insig1",6358.18545188729,-2.79240380746735,0.676320101089739,-4.12881  
97747901,3.6463006513321e-05,0.000454601090549151,-21.49059171009  
"Preb",6298.47660855297,0.323498756701407,0.105950964390497,3.05328751  
429865,0.0022634895770147,0.0110007910209211,1.45891084261747  
"Olfr734",9.55382763385655,0.996780588069544,0.433590156399314,2.29890  
040942618,0.0215105951600672,0.06087279890145,2.78995782218178  
"Lhfp12",1004.25510325856,-1.28847158908001,0.229086426495488,-5.62439  
079779085,1.86163774684532e-08,1.29175134476833e-06,-17.4710454954262  
"Sowahb",447.082634414625,0.518548755165115,0.405591326507912,1.278500  
6021449,0.201072972588602,0.332839869219166,0.570452259081458  
"Fahd1",4994.35743630215,1.50185704827868,0.360947240774209,4.16087693  
33083,3.17027899061779e-05,0.000406939432251913,11.7247669883477  
"Adra2c",87.3650115780272,0.661775774895242,0.343580820936975,1.926113  
8415425,0.0540901606820186,0.123394167892594,1.38468072474687  
"Proser2",530.076143175154,-0.551565690943267,0.324003216076058,-1.702  
34634588871,0.0886904616320888,0.180040252046066,-0.945700651121302  
"Tlr9",75.6562257827319,-2.28964880007395,0.539443724599896,-4.2444627  
5980349,2.19117751580403e-05,0.000308120099831026,-18.5118584399891  
"Fndc7",73.0661987895632,-1.38390497669098,0.468695148351783,-2.952676  
12979916,0.00315032294100866,0.0140214225782318,-5.9053563251766  
"6330549D23Rik",30.4099404379899,-0.0516942860027161,0.287328381969628  
, -0.17991360842376,0.857220391552557,0.909313051220921,-0.004914361410  
17486  
"Cenpe",333.340673423081,0.279636375721569,0.435875062328343,0.6415516  
73609902,0.521164319446622,0.65461853144528,0.118482661613479  
"Zfp423",229.594589164679,-1.96410853738477,0.353753592126924,-5.55219  
390303764,2.82106416606236e-08,1.75735172875028e-06,-26.0277821755717  
"Defb11",10.4160301235051,3.17288057765087,0.702857279022533,4.5142601  
0990938,6.35381963373947e-06,0.000119351421212574,28.6620209229452

"Olfr167",0.567270198094594,1.05925151824975,2.60056515276845,0.407315  
893286549,0.683775991226538,NA,NA  
"Nyap1",258.050547393138,-0.523387435167885,0.40834404712799,-1.281731  
51745209,0.199936844763793,0.331409385293245,-0.578029530505304  
"Sh2d5",48.8243353937565,-1.33920408305732,0.364114651282635,-3.677973  
62270323,0.000235094264686137,0.00192034686755354,-8.37705560274381  
"Fam186a",5.55864276524228,-3.38755415509286,1.42571876839385,-2.37603  
251790612,0.0174999205142479,0.0519034758422279,-10.0216369568659  
"Tnfrsf26",125.993861075205,-0.270559280058838,0.297619116687974,-0.90  
9078970026292,0.363308442506615,0.508324253891018,-0.183070078667346  
"Wdr81",2490.20969010961,0.697436998936602,0.194538341591816,3.5850876  
142451,0.000336965063852094,0.00253282375288671,4.16957164546209  
"Tmem88",383.072489475881,-0.618191388887848,0.252436916283799,-2.4488  
9455151184,0.0143295392539396,0.0447608709345266,-1.92036267404089  
"Pxt1",1.96223031508075,-1.09626892120782,1.44117742937133,-0.76067588  
8246483,0.446850679960254,0.587940789382889,-0.582260253654111  
"Olfr433",10.3153421729328,-1.0081501249728,0.653510979412294,-1.54266  
746348995,0.122911480097166,0.230612782807405,-1.47897159740928  
"Cxcr4",805.976459560198,-0.741344831622467,0.340711152584193,-2.17587  
486056616,0.0295646190616318,0.0778146520604343,-1.89296882382699  
"Olfr1033",3061.61024752477,-0.232943344541572,0.192623475518744,-1.20  
931960091699,0.226540083316524,0.362739471504112,-0.236220953313463  
"Epcam",5353.86371840987,0.20423212916998,0.35328699604377,0.578091272  
696256,0.563202498895906,0.691170841104756,0.0754368637947914  
"Kcnk13",69.7668074389749,-1.6431036052238,0.42443815963852,-3.8712438  
2648153,0.000108281413693025,0.00105510794811924,-11.2620164611645  
"Trim39",2692.65622458855,0.246476882672982,0.193280707270069,1.275227  
54937244,0.202228712914825,0.33427055310387,0.270090495585181  
"Akr1e1",2848.41597799096,0.393321937545409,0.216354894259122,1.817947  
95487426,0.0690720878145001,0.148666251043948,0.749691834154701  
"2410002F23Rik",3424.91775251417,0.14235550365469,0.190354605086198,0.  
747843760282172,0.454554403370399,0.594785702765992,0.0739613858275532  
"Dipk2a",803.62614053011,-0.705879190455678,0.210762228188309,-3.34917  
312520059,0.000810531323199691,0.0050075220975119,-3.73891083305593  
"Vmn1r230",7.65674717372318,0.167840985744709,0.911517204256868,0.1841  
33645487849,0.853908612442436,0.907033674297375,0.0163772020817095  
"Hnrnp2",4141.09508462599,-0.486938341355472,0.188550150719133,-2.582  
54018624903,0.00980759393689887,0.0332583182652484,-1.65727047794512  
"Tmem60",672.587775056946,0.28732165264543,0.168438437710033,1.7057962  
3363674,0.08804602462147,0.179030283457026,0.494250794837516  
"Cox19",2180.59495433619,0.223548540082003,0.326720776025881,0.6842189  
30920679,0.493836929844531,0.629916105843948,0.103317123355653  
"Insm2",0.463801677655936,-1.41126809556118,4.76769717342783,-0.296006  
236181843,0.767225318919558,NA,NA  
"Gprn3",162.517523106802,0.149573739645799,0.260977305387177,0.573129  
297292331,0.566557151735871,0.693868734701206,0.0546650854885065  
"Gm9797",86.9496633913723,-8.64366240312139,1.77246206633205,-4.876641  
68802703,1.07907187264713e-06,2.95019990124503e-05,-90.1624966112218  
"Zfp956",606.864318860833,0.210006715521577,0.159125875002442,1.319752  
14916087,0.186917782495861,0.315707113921023,0.24212521606869

"Ttlll13",70.9797635132142,0.559940188672035,0.261068267171679,2.144803  
71260065,0.031968544255855,0.0825014353013835,1.39701694374221  
"Hcrt",0.471948197980446,-1.46818818276866,3.04237042382883,-0.4825803  
49608101,0.629393734416373,NA,NA  
"Olfr459",0.288859012383133,-0.0627093998507145,4.78471990595721,-0.01  
31061798983548,0.989543080776425,NA,NA  
"Trrap",4310.33853969084,-0.0412514928698314,0.130155237763148,-0.3169  
40705412866,0.751288594563016,0.838213837078833,-0.00728014743073385  
"Pcdhb3",33.3346848397119,-1.40675892517587,0.418591272391177,-3.36069  
817495201,0.000777457339513486,0.00484618388933311,-7.49741131729978  
"Hcar2",258.724860257832,-3.36430564110779,0.892283794122757,-3.770443  
51053735,0.000162957686968875,0.00145072780169893,-21.9880584538362  
"Sys1",1649.6050184247,0.139412145498072,0.186561912807956,0.747270133  
543176,0.454900516903357,0.595158711573619,0.0723447496899315  
"A930002H24Rik",10.0330680832447,-1.46066549797157,0.645008511332603,-  
2.26456778834407,0.0235392154824438,0.0652591530608116,-3.986724292922  
19  
"Gpr150",22.4326832541387,0.866726459144633,0.479833894027288,1.806305  
20255691,0.0708706796504656,0.151517161384296,1.63556169789674  
"Olfr460",14.0278339486143,1.67551077951321,0.538444912832443,3.111758  
9554321,0.00185976283899121,0.00943876982036659,7.81278884737372  
"Pou3f3",4565.61272523602,1.27519110971506,0.515786620961759,2.4723229  
6824079,0.0134238181175748,0.0425036709412916,4.02726371638925  
"Onecut3",0.546794048034968,1.37998438118517,2.92079957231966,0.472468  
016725024,0.636592765475612,NA,NA  
"Zfp560",531.351250120984,0.365443723479888,0.260802901718212,1.401225  
68066645,0.161146597167898,0.28281155279745,0.461546101863693  
"Tssk2",0.783781142064145,-1.54960549054495,3.69106624612484,-0.419825  
97634812,0.674612587030255,NA,NA  
"Clql1",7.80005363650888,1.42498658264758,0.777058774202973,1.83382085  
107936,0.0666805915208955,0.144572242129926,2.75588978108867  
"Kcna5",127.166612947092,-1.18296402265157,0.376221357773185,-3.144329  
78939157,0.00166467720626463,0.00872289066588225,-5.60938424142083  
"Ddx28",512.663208071259,-0.344294265665367,0.25925047724726,-1.328037  
15279952,0.18416583355423,0.312303480834961,-0.400682735376287  
"Sprr3",0.338942840908474,-2.01407229344615,4.74887020508739,-0.424116  
096348245,0.671481147089063,NA,NA  
"Olfr600",85.8344622446342,0.245072053278701,0.340430083741308,0.71988  
95308704,0.471593014384942,0.609513495590455,0.121333749277821  
"Krt14",481.44128717553,-1.11583693323206,0.707966423512883,-1.5761156  
1251076,0.114999161617271,0.219222169057939,-1.69347178409951  
"Fpr1",25.6821347093643,-1.85997729758473,0.771000322797747,-2.4124209  
064341,0.0158469753310249,0.0480984316631885,-5.64411172656313  
"Mettl24",76.6166683495185,-0.101348283405239,0.247007122566353,-0.410  
30510518179,0.681582147574738,0.785782614798063,-0.0244325471827325  
"Mc2r",33.109063234866,-2.911365871735,0.86195364249307,-3.37763625351  
627,0.000731117221768891,0.00462630023945063,-15.6514965641638  
"Penk",657.223265102121,-3.46121044018272,0.666391992822092,-5.1939556  
2591456,2.05872230563118e-07,7.91735059471335e-06,-40.6569489740834  
"Vmn1r233",193.20521710248,0.348266101278276,0.426103160272029,0.81732

8134942578,0.413740932513393,0.5571600733577,0.203701781388487  
"St7l",1088.27002350333,-0.008575568192428,0.196840138331156,-0.043566  
1560956679,0.965250229593672,0.97904389433121,-0.000181620257114023  
"Frrs1l",12.5664313936254,0.456544892558833,0.614272610858909,0.743228  
469718791,0.457343369684282,0.597352694406761,0.235233642893534  
"Olig3",0.14505395440001,0.892077966308475,4.78471990596623,0.18644309  
0471422,0.852097303472138,NA,NA  
"Glb1",4295.69053851122,1.43472154734778,0.285565674162014,5.024138673  
382,5.05696891370188e-07,1.5903351593445e-05,15.852210656263  
"Zfp553",698.377155035435,-0.101287094106207,0.131232003124391,-0.7718  
17024008995,0.44022280735197,0.582048165575962,-0.0548167855975695  
"Dbx2",1.98394099588099,-1.10396942316796,2.14856562688838,-0.51381694  
3430656,0.607379980766495,0.727795898782271,-0.350769314997036  
"Chrm2",1.53722208795043,-1.74972146477712,1.646139664919,-1.062924065  
35458,0.28781638854321,0.431846398138938,-1.46921541726295  
"Odf3l1",46.3009404449833,-3.62941341351567,1.13938452662684,-3.185415  
74744795,0.00144546186170623,0.00781792382234344,-17.6075048793288  
"Esf1",2667.26970772263,0.556435535704188,0.24176586313037,2.301547160  
13044,0.0213607229216713,0.0605365371405156,1.56052800960732  
"Pigz",61.159988895332,-0.248304912559216,0.503150160203673,-0.4935006  
13134463,0.621658906713599,0.739678120650623,-0.0748739029390997  
"Sh3tc2",1481.7472696374,0.356369183517402,0.153554986497261,2.3207919  
9540523,0.0202980727380498,0.0581162734576352,1.01398064489688  
"Tmprss12",2.92405271547473,0.116581086699585,0.955107150396311,0.1220  
6074119664,0.902850913320033,0.940574220341633,0.00714230734494147  
"Mtus1",4730.87408519699,-0.599790416248356,0.351739990605927,-1.70520  
96215023,0.0881553362083151,0.179177811465624,-1.03126561023277  
"Zfp629",1880.18983479756,-0.105675336499469,0.141143771016216,-0.7487  
0705053876,0.454033793182733,0.594303900340825,-0.0549896908622353  
"Vwc2l",0.302548309014047,-1.06212995308167,4.77767916045835,-0.222310  
857931233,0.824071900175153,NA,NA  
"Pcdhb10",36.0113028283569,-1.20073534946539,0.297764541418435,-4.0324  
9944988599,5.51867442356613e-05,0.000622703205501692,-8.8631565963843  
"Pid1",1103.98459623819,-1.27468417125347,0.193848356583848,-6.5756769  
5551811,4.8432304975191e-11,1.34904726058039e-08,-23.0989114984572  
"Plekha7",2226.95048696428,1.26480698690477,0.274387006598564,4.609573  
18126664,4.03496486158434e-06,8.43740065777616e-05,11.8642072348438  
"Henmt1",26.0706273146978,0.75430086962522,0.663209930523823,1.1373485  
7532886,0.255392595771964,0.396121615811132,0.698508254702493  
"Cdc42ep2",759.731553661883,-0.597910914482926,0.160015717920704,-3.73  
657614547105,0.000186542976698078,0.00160300350800314,-3.8480806343805  
1  
"Mfsd5",1365.83200902805,-0.263819974732632,0.1578730909774,-1.6710889  
3035102,0.0947041135302297,0.189427657531024,-0.438929976901978  
"Smtnl2",1965.2946821297,0.581499815215379,0.393547945126007,1.4775831  
5706411,0.139519385288304,0.25366924415809,0.797657280962766  
"Spred2",1565.81199215442,-0.267616840104571,0.164263437404165,-1.6291  
9298617931,0.103272171290305,0.202168754600239,-0.427826333562483  
"Col27a1",6614.48056000591,1.74663076815863,0.332930159903534,5.246237  
73545993,1.55236565310293e-07,6.37221589562125e-06,20.8959277296363

"Olfr1489",31.5326698378411,0.0416998051500856,0.357593909886465,0.116  
612179338639,0.907167385860876,0.943127331475567,0.00244168944785281  
"Pqlc3",543.950467159226,-1.37401037434307,0.279188108533852,-4.921450  
20630942,8.59052602767752e-07,2.46207451603659e-05,-14.5808897809411  
"Tcf21",3672.61432182421,-1.30615629952394,0.418278262962769,-3.122697  
05404272,0.00179202098984296,0.00918515849937256,-6.1260902639621  
"Lcn6",0.410318279429751,-1.66854370216792,4.62375236856174,-0.3608635  
51757841,0.718201451692732,NA,NA  
"Pcdhb4",38.1426879629863,-0.791376140902357,0.358349974785115,-2.2083  
8899563731,0.0272171682426996,0.0731266840838027,-2.06989331712976  
"Wdr89",356.928345202083,-0.225227673720593,0.169554095984751,-1.32835  
2891816,0.184061554176991,0.312231392216994,-0.262167427627083  
"Thtpa",1115.72841507214,0.238738085619315,0.154827200804361,1.5419647  
4766074,0.123082160321928,0.230888585910809,0.34994705991875  
"Gm21411",0.867953429624288,-2.67925143883264,1.98823027922566,-1.3475  
5589773842,0.177801263418848,NA,NA  
"Smkr-  
ps",25.3711854400019,-0.308679726714979,0.47976478566766,-0.6433980482  
4443,0.519965849558524,0.653366896609661,-0.131379167737691  
"Prr15",1037.95489664976,0.119792657454816,0.473143972444659,0.2531843  
67616196,0.800125745897457,0.872335707532353,0.0163613941746273  
"Adrb2",528.649875780077,0.775035216501548,0.19852378741865,3.90399169  
07647,9.46190306204525e-05,0.000948037954284472,5.39511006192096  
"Pnoc",0.20231518320793,-0.0578160724334402,4.7847199059601,-0.0120834  
810751245,0.990359011624255,NA,NA  
"Sprn",15.2617626439478,-2.60358891875506,0.783606182408475,-3.3225732  
226266,0.000891912591222651,0.0053991032920395,-13.5946978498574  
"Bricd5",8.83627102686002,1.2011854751562,0.493280842295624,2.43509451  
850215,0.0148879002165001,0.0459746589934408,3.69924877714258  
"Mms22l",165.04940489092,-0.19847429450305,0.281288173606744,-0.705590  
611784936,0.480442764271972,0.617879626526938,-0.095557755276234  
"Tssc4",1562.16058762552,0.0395750024397342,0.146302081927306,0.270501  
977267816,0.786774095965949,0.86216609470826,0.00586926340578757  
"Zfp764",414.047525380658,-0.0922812270276365,0.148595402800201,-0.621  
023432008299,0.534584205976966,0.666636878171889,-0.0374209411635134  
"Togaram2",56.5291826776118,-1.57110300810866,0.474649128404539,-3.310  
03032364071,0.000932858644436109,0.0055662270292408,-8.15565514698004  
"Basp1",1471.96753978567,-1.48357234736694,0.290817081858514,-5.101393  
41845371,3.37161874596939e-07,1.18024815635388e-05,-16.8343932476894  
"B230219D22Rik",3088.74849024026,-0.197507503322786,0.117908664889028,  
-1.67508896406108,0.0939167779185722,0.188103681135729,-0.329988025887  
877  
"Slc16a5",657.041541913719,1.69100746838731,0.54780310768441,3.0868891  
4806503,0.00202263008284455,0.010086250986011,7.77285461118996  
"Lrtm1",26.3756946547364,-2.58497860608754,0.971739811363514,-2.660155  
09075457,0.00781046774439442,0.0279531020705217,-9.24705552033302  
"Ifitm10",285.191727771141,-0.173413966699867,0.357746871018757,-0.484  
739296827491,0.627861287437046,0.744196922945138,-0.0512350867131831  
"Olfr624",3028.43270921954,0.106116057728161,0.139688532746478,0.75966  
1910979856,0.447456701794605,0.588380818154249,0.0562819292256242



"Ccdc149",364.35769063138,0.185392325668561,0.121826141208905,1.521777  
86991262,0.128064748324934,0.237583868966657,0.266452262309857  
"Whamm",1333.28492082102,0.10925697157628,0.204750665439192,0.53360984  
8553718,0.593611492984113,0.716360518054357,0.0364450361391383  
"Gm9800",9.18057309356153,-0.621919697928691,0.834314004402912,-0.7454  
26415769895,0.456013979674566,0.596135472725088,-0.321711182824677  
"Hsf3",9.07174661594695,-2.22670378624153,0.726027049418126,-3.0669708  
3535127,0.00216239954305416,0.0106131711998303,-10.1218371821809  
"Olfr984",4.91634907153143,-0.495224212266365,0.753758420694498,-0.657  
00654038475,0.51117671102669,0.645400732474157,-0.216850691836351  
"Zfp36l2",5314.32854843052,-0.586937808517976,0.109538703505107,-5.358  
26871906159,8.40232066732043e-08,4.01540314635818e-06,-7.2929210845109  
9  
"Zswim3",211.06512964834,-0.332279244727088,0.175560414303097,-1.89267  
749250935,0.0584007713516166,0.130899901116659,-0.675630818558569  
"Ptprcap",311.314359316671,-1.67040337556944,0.469647670960383,-3.5567  
1597849859,0.000375519767190145,0.00275155370938499,-9.84801267128863  
"Serpib9",2686.48184267525,-0.999124291153428,0.307275518797069,-3.25  
155838989331,0.00114774197939403,0.00653612086910186,-5.02600625298071  
"Hdgfl1",0.0949500915947116,2.04836625511614,4.7634299069052,0.4300191  
86835683,0.667181684222319,NA,NA  
"Ccdc9b",1028.219481726,-0.244540388403868,0.190609324337448,-1.282940  
32442475,0.199512983938669,0.330960027295914,-0.27040241116709  
"Lym2",738.973348631981,0.404106050019915,0.271083845320178,1.4907050  
2354216,0.136038956606206,0.248546437022844,0.562566369910488  
"Cradd",545.290049897991,0.60687168007776,0.147005638169593,4.12822043  
857695,3.65581558633046e-05,0.000455179388903393,4.66976770735036  
"Gvin1",2948.63523089195,-0.952354790510316,0.322729323404943,-2.95093  
975490834,0.00316808703759991,0.0140702147090533,-4.06055049938923  
"Slitrk6",157.851578789104,0.859587874584904,0.315797457642197,2.72195  
945148751,0.00648961046703021,0.0242775182053252,3.19612353231895  
"Adra1a",296.156753418197,-0.349659637153339,0.503605172431202,-0.6943  
13037861234,0.487485916369279,0.624255064024445,-0.16475830549571  
"Pcdhb8",25.2336727688522,-1.94497083342942,0.459183651081245,-4.23571  
44659867,2.27826134593978e-05,0.000317750641796379,-15.6652689419528  
"Gm9803",908.960300999316,0.295341111859323,0.334044786577696,0.884136  
270723176,0.376622655592146,0.521918161957048,0.19204392807291  
"Paip2b",909.928479474312,-0.650746807733537,0.243518172013038,-2.6722  
72062303,0.00753395388190296,0.0272494631535133,-2.34445948850329  
"Npas4",80.3281403799808,-0.942739410687955,0.353990007057224,-2.66318  
085791489,0.00774057983175856,0.0277794635670216,-3.37826732060677  
"C2cd4c",3.77153306398411,-2.97886989909439,1.27281328634309,-2.340382  
46697829,0.0192640007502908,0.0558444077652647,-8.59459339511143  
"Ccdc42",6.51199173179451,-0.431266783483377,1.03005913574952,-0.41868  
1577120876,0.675448861459321,0.781132971573774,-0.106527158824438  
"Tmem268",853.845245477631,-0.44059711938988,0.217510937228069,-2.0256  
3202110566,0.0428025076064236,0.103227991500003,-1.0005146477918  
"Gm20715",1.1303824723758,0.137012958919284,1.93333125274941,0.0708688  
481213122,0.943502136613836,NA,NA  
"Clec14a",632.0525393887,-0.511724664752682,0.231420823370488,-2.21122

998915896,0.0270199146726845,0.072719379150196,-1.34130575748575  
"Ifit2",1224.43329339636,-0.75972647957683,0.273840590342698,-2.774338  
45225819,0.00553140985437336,0.0214203434638673,-2.91994352404342  
"Mtmr11",2994.25455247949,0.81012697130086,0.279138862331775,2.9022364  
1571617,0.00370508810096233,0.015863374570172,3.35695740989331  
"BC049762",36.0817227231749,1.71247368157144,0.584658681167637,2.92901  
437493652,0.00340038696205344,0.0148789822679798,7.2057564291714  
"Mrps12",1277.04573575683,-0.064846392333212,0.354196642843893,-0.1830  
80200344508,0.854735091032531,0.907618501682864,-0.00628563479867052  
"Cavin2",3056.45354443399,-1.76346956230688,0.607686812434381,-2.90193  
817970552,0.00370861718546001,0.0158715140215319,-7.30645884399305  
"Wnk1",13771.3251425707,0.762968070716572,0.187751649681581,4.06370901  
140168,4.82990327626438e-05,0.000563912898686245,5.70746715426203  
"Gpr158",0.371686272981569,2.13924345040761,4.61331655456213,0.4637105  
26929288,0.642855154087005,NA,NA  
"Tedd2",46.2161634253672,0.565344291854482,0.404861491783004,1.396389  
39076353,0.162597268151195,0.284732261098924,0.710188877359448  
"Ing1",1256.18602363273,-0.255600669180462,0.0940672850378864,-2.71721  
108010629,0.00658346064115799,0.0245673331256074,-0.947342381053174  
"Slc25a51",9252.56384727494,0.308823025021816,0.31263635479341,0.98780  
2666858388,0.323249301222073,0.468142433011015,0.2343913288219  
"C2cd2",1374.99810748451,0.295321329270769,0.127983758433821,2.3074906  
7604135,0.0210274814351501,0.0598094577713429,0.831799538061115  
"Tmem104",693.179762710825,-0.255808370529721,0.138824200181569,-1.842  
67851134852,0.0653759632745037,0.142392820813927,-0.498612900818389  
"Eif4g1",14958.9797100965,-0.168012965278403,0.212274875598826,-0.7914  
87757580539,0.428659417373394,0.571375819590226,-0.0940382189009761  
"4930451I11Rik",0.493952006882521,1.97728924946012,3.62720988209658,0.  
545126781667573,0.585666324262972,NA,NA  
"Onecut2",9.76181394928311,0.645997613120569,0.609540154638907,1.05981  
141390637,0.289230403121976,0.433138960641791,0.540504056374154  
"B3gat1",8.06540089728015,-0.815916430965818,0.722988000553942,-1.1285  
3384888916,0.259094530017696,0.400271384698917,-0.747063283292911  
"Polr2k",1237.88366368977,0.625704255709394,0.243218113610353,2.572605  
4956244,0.0100936188730966,0.0340611597071022,2.11462857298709  
"Gapt",37.520730735612,-1.53918563569337,0.453935120045312,-3.39076129  
54462,0.000696987784224603,0.00444985848618576,-8.33451010818995  
"Pnlip",1.67993606150086,2.13666277030313,2.69040123169364,0.794179970  
308025,0.427090667257088,0.57005844949197,1.20083947639168  
"Zfp830",1283.99820128118,0.718842450053224,0.162753121736167,4.416765  
97281196,1.00188601025484e-05,0.000171490830524918,6.23306905324635  
"Pofut1",1642.79097906925,-0.686939830393807,0.128553450058033,-5.3436  
1256025181,9.11122066558125e-08,4.25001388845702e-06,-8.49647595393204  
"Stard5",3285.19548203764,1.08870666366783,0.193805862737939,5.6175115  
0500518,1.9372727855233e-08,1.32536648323275e-06,14.7343617016418  
"Calhm6",136.368657768994,-1.64516418505534,0.528367338397822,-3.11367  
502397859,0.00184772882449687,0.00939426769753323,-7.67905981328603  
"Snx12",1504.90856085026,-0.274491664641681,0.164418952737573,-1.66946  
486442955,0.0950252880012859,0.189933681747727,-0.455952699720557  
"Otulin",1128.75199058567,0.0465781257583533,0.165226625020279,0.28190

4479696517,0.778016754492173,0.856613624659122,0.00720881773291175  
"Olfr803",3.13527989957313,0.536311028476637,1.02044411553564,0.525566  
290511778,0.599189583262363,0.721152069689338,0.1753228902907  
"Rp1l1",0.0878637210809483,-0.0623267594334185,4.78471990596623,-0.013  
0262085677578,0.989606883219816,NA,NA  
"Sbsn",512.122373418181,-0.228515345994752,0.239953004802937,-0.952333  
754613417,0.340927744254872,0.485536333274729,-0.165102601926876  
"Eid2",541.966417013729,0.590301248410487,0.177238826329908,3.33054139  
791985,0.000866772739476394,0.00527805586330754,3.09565630564596  
"Ppp1r15b",4278.49365745716,-0.00569483793919011,0.22881564470049,-0.0  
248883241643919,0.980144040317949,0.987144496108929,-7.36846593602257e  
-05  
"Igfals",383.285805452129,0.169950111053537,0.530617204566617,0.320287  
600158658,0.748750322109486,0.836530700234401,0.0303347451490467  
"Lrrc8d",2741.85551190632,0.597350632585782,0.190217285749302,3.140359  
3539499,0.00168740709683634,0.00882539258962312,2.82554148304728  
"Clec9a",913.804393131185,-0.969905120529044,0.520262703559015,-1.8642  
6033212474,0.0622851545183693,0.137293014341038,-1.92588031464318  
"Tmem174",9126.9469610276,2.23543963318771,0.812575850159875,2.7510534  
9580335,0.00594039414143013,0.0226576300801261,8.46618800888113  
"4931422A03Rik",0.910217766425725,-0.194940395524212,1.69293484059921,  
-0.115149378965592,0.908326721416605,NA,NA  
"Hpcal4",89.6573248226649,0.619988402774317,0.318586324407988,1.946060  
94259196,0.0516474195140496,0.119202342055509,1.3186737168643  
"Mosmo",1822.66616444672,-0.0277028766363114,0.102213099436179,-0.2710  
30589906031,0.786367505132262,0.861835909821113,-0.00411915142799492  
"Mcmdc2",483.017376616212,0.872525914709862,0.420503686708654,2.074954  
25673733,0.0379907744528684,0.0942542461231744,2.0606962825233  
"Il17c",1.44339759238912,1.31321905484455,1.24297169090014,1.056515658  
77058,0.290732690679366,0.434383601752205,1.0949978466277  
"Serinc4",26.4586755130242,0.237176084280856,0.387809076143662,0.61157  
9508760635,0.540815998922345,0.671388663376282,0.0944926310965254  
"Cep295",1015.25454597069,0.217728649856986,0.20921757524777,1.0406804  
9540836,0.298023858443287,0.442395827326016,0.177568657157451  
"Vmn1r184",0.600258693882703,1.81616558850919,2.25932648805526,0.80385  
2651713241,0.421482077726591,NA,NA  
"9930021J03Rik",2199.51378751609,0.235742537556752,0.222535149867522,1  
.05934966991548,0.28944056199676,0.433249814049811,0.197184671895286  
"Patl1",1258.50979931836,-0.188388075040734,0.155193998851062,-1.21388  
762732719,0.224790638221193,0.360946048261288,-0.191972493992338  
"1700018M17Rik",1.61816700464389,-1.60699939862666,1.58540192441232,-1  
.01362271224841,0.310762815885558,0.4560545517464,-1.26172408071549  
"Fut10",145.224841197922,-1.60367078638561,0.338179307254888,-4.742072  
48043393,2.11542907550542e-06,4.99353948113858e-05,-15.8840071202526  
"Tmem229b",515.324963091068,-1.46137556845941,0.243014737006181,-6.013  
5265312006,1.81530204258548e-09,2.45452644100394e-07,-22.2423726084231  
"Chrm3",169.066741014958,1.01284562784989,0.480080105539914,2.10974297  
031286,0.0348805010894562,0.0881872419919888,2.45948592291689  
"Olig1",13.9833560662274,-1.94361089212564,0.723312661738319,-2.687096  
45902591,0.00720761351635295,0.0263625517419526,-7.06660141519085

"Gldn",7.49482134740563,-0.0217429186246966,0.850140177806275,-0.02557  
56864483251,0.979595779128856,0.986845872266198,-0.000287906889833999  
"Kcnrg",8.49314475999954,0.221308182974145,0.657349625010002,0.3366673  
90615424,0.736367648229849,0.827704291313188,0.0418492279023833  
"Adamts6",447.368003327974,-0.193368529393592,0.238971740136118,-0.809  
16902259426,0.418417930577627,0.561403303771165,-0.111634693743112  
"Nxph1",2.54113797308501,-1.93744756208137,1.06201078679965,-1.8243200  
4096666,0.0681037023363186,0.146987601079648,-3.71487559934611  
"E2f8",95.6417775377325,-1.03567930413028,0.481015376539339,-2.1531105  
9613409,0.0313099876919932,0.0812199226058974,-2.60017098181145  
"4930550L24Rik",0.47127039032991,3.03578668866462,4.39413696897156,0.6  
90872112112415,0.48964591308547,NA,NA  
"Gsg1l",3.59969211670813,-0.646913862418079,1.02136401843939,-0.633382  
271882399,0.526484039094122,0.658966863156836,-0.269816146499693  
"Zfp84",552.291092203295,0.0286494612167863,0.142507823990853,0.201037  
812623012,0.840669007408656,0.898077364474886,0.00307979021947991  
"Cd109",176.792382983528,-1.14111553458817,0.306901748806017,-3.718178  
66476032,0.000200664333610638,0.00169742003329293,-7.27877182132449  
"Pcdhb20",109.798987911291,-1.3694747537754,0.237763841477297,-5.75981  
084956591,8.42082465160204e-09,6.968039239569e-07,-19.414717348036  
"Iqub",8.07939944561116,-1.02785261167738,0.777813827234735,-1.3214635  
3753002,0.186346852597567,0.315015686834347,-1.18730630840419  
"Ttc39d",3.86627945345498,1.53188426648195,0.881357812618596,1.7380957  
4788992,0.0821939440261768,0.169750823071962,2.71667980842002  
"Scaf8",1635.09165772762,-0.10743519419742,0.113134548837188,-0.949623  
216794983,0.342303737251901,0.486850847540854,-0.0773315810466484  
"Sprr2g",92.2229453792599,-1.87372387149423,0.518775121504134,-3.61182  
291483364,0.000304052172362883,0.00232943389262534,-11.3587577033388  
"Pnma2",6.25037633685489,-1.24965712627952,0.851371938671863,-1.467815  
73307312,0.142154282656896,0.257212713738321,-1.69684924891886  
"Pik3r6",407.128219075704,-0.436549927856862,0.363412454470575,-1.2012  
5197275595,0.229653474335607,0.366310818275168,-0.438415338750986  
"Olfr735",247.706746310496,0.420849716394945,0.204331571564082,2.05964  
11664311,0.039432857684013,0.0968827947483476,0.982369853030065  
"Cym",28.7783657440268,2.50056035822095,0.423273255818587,5.9076738816  
9849,3.46972022033974e-09,3.6767720030535e-07,37.0484534432846  
"Rprml",21.6436754764982,-4.04875333325862,1.44873659146577,-2.7946787  
2704331,0.00519513151802647,0.0204732879593447,-15.744120957985  
"Plaur",499.443841983873,-0.826417435548488,0.269792451417566,-3.06315  
996317264,0.0021901295229984,0.0107240445603774,-3.74802364384889  
"Scand1",4502.81169078846,0.757810943069473,0.240661332772103,3.148868  
72078902,0.00163903807523215,0.00861686641511838,3.60265882624204  
"Vps13a",1774.97944645128,0.391789542820024,0.176872544928882,2.215095  
29914638,0.0267535240359082,0.0721510729156009,1.03001201383421  
"Hepacam",4.19909948938682,-0.491016728067042,0.863811087189139,-0.568  
430685075855,0.569742559540709,0.696784822550633,-0.177393853437719  
"Nme9",5.6953948023812,-1.50824234602043,0.844088335332738,-1.78682998  
317455,0.0739649717302642,0.156689376227368,-2.79551199855104  
"Pilra",274.700919825025,-1.37443441949983,0.539532017067398,-2.547456  
64023889,0.0108511337094957,0.0361111802470981,-4.56470666501236

"Sprr2h",0.0986945508552764,0,4.78471990596623,0,1,NA,NA  
"C87977",0.397839477546787,0.268358575704588,3.70913098889925,0.0723507949726597,0.942322742036817,NA,NA  
"Usp27x",201.293955699986,-0.91091743903582,0.26491706085299,-3.43850047295109,0.00058494551589253,0.00388860131908372,-5.05532374380379  
"Olfr1444",2.281948308185,-0.791511467210142,1.31046585044647,-0.603992440505396,0.545848668085255,0.675786229622598,-0.310176311716761  
"Trarg1",1822.24790826287,-3.34441112506574,1.03180336001997,-3.24132606526986,0.00118975013426706,0.00671728246680935,-16.7323283220747  
"She",615.210354495909,-0.804169566787361,0.180474722434228,-4.4558570637527,8.35586936438904e-06,0.000147977058008045,-7.09153177777603  
"Pnma3",0.949517026628792,-0.0722622627387008,1.37217060041295,-0.0526627393976767,0.958000627460508,NA,NA  
"Ankle1",187.081644858622,-0.413677348805844,0.398753110597213,-1.03742726467081,0.299536777258678,0.443912191009953,-0.335959166467474  
"Zfp62",1455.93879702702,-0.130852722458391,0.129344506120304,-1.01166045921335,0.311700427457272,0.45678578989567,-0.10252843755432  
"Myorg",1221.7823716129,0.557886957888285,0.412735693457843,1.35168091040148,0.176477414420955,0.302901111477093,0.666311669738081  
"Stxbp6",794.772787991703,0.269861554673148,0.219612356824363,1.22880860883877,0.219143573040189,0.354712052726017,0.279697721673379  
"BC107364",2.48728200813097,-0.0340059705543623,1.31137388914077,-0.0259315598975693,0.979311927347432,0.986751276906632,-0.000453546824062213  
"Ccbe1",513.443319854826,-0.726703279206846,0.338497070754961,-2.14685248999661,0.031805026978014,0.0821805481072511,-1.81591278481767  
"Hs3st2",0.148177164577155,2.59891947282789,4.7275994170606,0.549733436265582,0.582502219767124,NA,NA  
"Dppa3",10.0416162167946,-0.892483121413126,0.755390348088746,-1.18148600080905,0.23740971148478,0.37551833816259,-0.874140783597059  
"Ermp1",4663.85954221744,-1.20852525272955,0.311231034822979,-3.88304866003137,0.000103154914660992,0.001013767402248,-8.33167193333111  
"Slc25a23",3279.22137242165,0.35980413488709,0.288624090532833,1.24661851414707,0.21253740986489,0.346869876751119,0.380962620082721  
"Rpl37a",17983.0740027947,-0.128770943468634,0.179041113729808,-0.71922554985311,0.472001959384749,0.609839918102434,-0.0636848014218548  
"Fam178b",25.6928696919584,-1.00457578800031,0.379576172017265,-2.64657231422476,0.00813121179282333,0.0288468645444813,-3.56197859171752  
"Gpat2",43.0891946090849,0.576326024294385,0.568868931990875,1.01310862992186,0.311008276640554,0.456148591690802,0.452379426642345  
"Gm11223",0.806833505912045,-1.47689673765954,2.48070472879477,-0.595353699501788,0.551607067839356,NA,NA  
"Smco1",14.8643650108264,0.162317077288823,0.482545702741729,0.336376588510829,0.736586901621923,0.82777933186307,0.0306793344954064  
"Zfp322a",1026.99307336001,-0.290191848501579,0.144309923779361,-2.01089322828042,0.0443367357852446,0.106149026810007,-0.650874564256481  
"Gjb2",2168.67449187458,2.07810747308053,0.509514111257742,4.07860631759677,4.53064824322021e-05,0.000537339291035934,15.6458235294144  
"Defb14",0.733296985354579,3.27734867467483,2.8244509227334,1.16034895430335,0.245906760632623,NA,NA

"Rpl27a",11265.0344296671,-0.00267225188745464,0.148526380480676,-0.0179917660337943,0.985645422102434,0.990729196996256,-2.48894726212245e-05  
"Mgat4e",0.551672334632118,1.30957552710193,3.12852760408897,0.418591648477168,0.675514594181005,NA,NA  
"Gm5590",12.0277860180226,1.44536492027951,0.655379216405279,2.20538717752946,0.0274269370501122,0.0735445781630849,3.77220522332189  
"Asphd1",3.23319229874914,0.313494473814946,1.39030996451503,0.225485310338187,0.821601751800111,0.885647443420974,0.0380696174215315  
"Jrk",223.727826394491,-0.499539750484162,0.218694590384446,-2.28418887548162,0.0223604330777571,0.0627585611271208,-1.38295595648323  
"Pcdhb17",229.810628486666,-1.31837420730202,0.224394146110433,-5.87526114274478,4.22177290294963e-09,4.2872983365475e-07,-19.3305812286525  
"Gm9806",0.570411274519477,2.02106566356441,3.52066993643622,0.574057125505559,0.56592914515984,NA,NA  
"Rbp1",2511.89196810842,-0.991651826492442,0.348470729137123,-2.84572488756216,0.00443104587880767,0.0181048894687745,-3.97808393134181  
"Yod1",917.505510248543,0.34901103272079,0.194510960555752,1.7943000832632,0.0727652848309642,0.154668867724206,0.651418198036838  
"1700067K01Rik",57.8616581690002,1.41799010979423,0.324667876829407,4.36750972606784,1.25671201801575e-05,0.000202339974626516,12.0608017060573  
"Kcnk6",334.116422522523,-1.26879103427942,0.249843500717679,-5.07834316536072,3.80740537723912e-07,1.29107460948536e-05,-14.2833523428804  
"Lrrc75a",315.978344077601,-0.516192790477479,0.253892316509279,-2.03311702210812,0.0420407016422368,0.101751439997559,-1.17961527716273  
"Bex3",1596.00569696217,-0.0697501174783448,0.254224537547155,-0.274364222082249,0.783804735056582,0.860314384380389,-0.0104944208584069  
"Hnrnpa1",11705.2217374952,-0.583085151621418,0.172962087115934,-3.37117319375653,0.000748487858507888,0.00470168049780502,-3.12524036774916  
"Gm5564",1.40411424117109,1.64314756656937,1.26942378835663,1.29440426565233,0.195525818002107,0.326205390554042,1.84070001675329  
"Cmtr2",269.718397882896,-0.17463891338417,0.209869517583686,-0.832130913506922,0.405335054393845,0.549178159305898,-0.104666754564703  
"Ppm1e",190.894507923041,0.786461683916088,0.277121974464545,2.83796218410932,0.00454025613810072,0.0184311502551563,3.14090232745418  
"Camk2n1",10160.1102060336,1.05514484925043,0.370121217959592,2.85080886490984,0.00436081743686618,0.0178929331616197,4.24521643785248  
"Nexmif",77.2432360199983,1.13031063436379,0.320566081315812,3.52598325351284,0.000421913647072074,0.00302072628954978,6.5583539018245  
"Olfr71",48.4752294787874,0.492983624772674,0.399306232728455,1.23460037526618,0.21697926928254,0.352320269193118,0.514287745187812  
"Tmem150b",70.2761150181102,-1.01610119136632,0.453595950883547,-2.24010198809555,0.0250843025068079,0.0686351010774262,-2.72208550349268  
"Sh2d7",0.79254241683963,-3.42669691171658,1.99707849573055,-1.71585489455839,0.0861886040014287,NA,NA  
"Sox18",950.505111187742,-0.97493918692271,0.257460623446962,-3.7867506645091,0.00015263011746396,0.00137968568860097,-6.42085156962767  
"Krtap4-16",0.202190776426006,-0.0499425078147937,4.78471990596107,-0.0104379167007399,0.991671898642394,NA,NA

"Scn4b",863.996972000175,1.71102446160594,0.542226936715743,3.15555046  
374047,0.00160195551562182,0.00847163782034018,8.16335146977797  
"Olfr231",0.21750204661561,-0.791393820394023,4.78471990596445,-0.1654  
00239919478,0.868628964847772,NA,NA  
"Mospd4",6.48295326837692,1.7530703980097,0.731305842105626,2.39717816  
688314,0.0165218878753112,0.0496982057687162,5.26234296272227  
"Rnf222",4.5603949160362,0.600786449182275,0.815804971870641,0.7364339  
14842013,0.461466671352049,0.600766318890448,0.306130278906948  
"Clqtnf2",380.923546982556,-1.45578443951504,0.307824142438909,-4.7292  
7311022707,2.25325107758106e-06,5.24270757883956e-05,-14.3483386518672  
"Tafa4",0.295185043076733,-0.54538121435359,4.78471990594886,-0.113983  
937424533,0.909250526528299,NA,NA  
"Cox17",4584.49996712969,0.379432053536519,0.294934118490558,1.2864976  
6082816,0.198269434664484,0.329345496429384,0.421415427911842  
"Golp3l",1229.66877842685,-0.0753202146352145,0.157718290330783,-0.47  
7561698628899,0.632962197213481,0.748110649989163,-0.0218582565026272  
"Kctd4",2.88360295215999,-0.991946244727511,1.16210537883717,-0.853576  
846636815,0.393339491822765,0.537896858715126,-0.615094409004368  
"Ar",2819.65661057928,0.833490098533463,0.15660958402031,5.32208870707  
028,1.02582524392614e-07,4.66236377763915e-06,10.2319144393918  
"Zfp526",142.938996590732,-0.55838360520521,0.267480929261744,-2.08756  
417418754,0.0368371665211264,0.0920244808236929,-1.33213612509683  
"Fam43a",1898.40304137,-0.734506184216163,0.167126787542985,-4.3949039  
828654,1.10821726997656e-05,0.000185476569356248,-6.31130461344948  
"Spin2c",54.8886472943273,-0.55645043852736,0.367346796049035,-1.51478  
233786768,0.129827534722743,0.239881258636289,-0.794394897069139  
"Zfp319",856.519522831239,-0.408000001699152,0.0941079044435392,-4.335  
44880328235,1.45463028397407e-05,0.000225995069935669,-3.4251589426009  
2  
"Arsj",14.3664137176238,-1.42865748424232,0.4749707700159,-3.007885062  
47342,0.0026307261318392,0.0122830215801247,-6.28543193301765  
"Unc119b",5137.33650700903,0.581496059300963,0.21490834222493,2.705786  
3518967,0.00681428705585339,0.0252643029121562,2.13895349129381  
"4930430F08Rik",392.934285820284,0.245143291698454,0.176090074500312,1  
.39214712921267,0.16387784914517,0.28641199148082,0.306508534939762  
"Zfp518b",302.653857173274,-0.24962476482051,0.165484879230376,-1.5084  
4455385558,0.131440787300235,0.242004954747873,-0.35416688714102  
"Lym4",881.385967792108,1.00151100294592,0.211780791307606,4.72899830  
415332,2.25630268168345e-06,5.24355061829128e-05,9.87081893131633  
"Prr12",2170.33617191642,-0.142731237959778,0.143328675195748,-0.99583  
1697773289,0.319331926249615,0.464443823512979,-0.109462679935218  
"Gm7862",3.20700839043627,-1.16560913136776,0.891667706262022,-1.30722  
366996349,0.191136758876752,0.320970159726028,-1.32460651663908  
"Cfap58",2.02312441784446,-1.14510032059119,1.37910246902129,-0.830322  
87035483,0.4063562607814,0.550255876985606,-0.684050729077561  
"Lrrc8e",287.780074642825,-1.77962813474423,0.537063137407203,-3.31362  
927520178,0.000920935235970416,0.00551994934858628,-9.25297466736853  
"Ticrr",79.9207362956223,-0.474182752552891,0.459400617607965,-1.03217  
700276916,0.301989206258957,0.446722005254968,-0.382105371909313  
"Tmem215",45.9247206161506,-1.56132091265572,0.552556463279216,-2.8256

314357267,0.00471875242844866,0.0189899349535381,-6.18883593454856  
"Bdh1",4260.92242379343,2.0085343679043,0.581952431305828,3.4513720707  
3334,0.000557744096665164,0.00375773821588713,11.2155314634059  
"Tcaim",1439.04357698965,0.862282347513054,0.243000593276147,3.5484783  
6331474,0.000387463830211664,0.00282315760891892,5.06151054891048  
"B3gntl1",384.765117107849,-0.231025917427809,0.18688166177264,-1.2362  
150209734,0.216378648685246,0.351719057527942,-0.241404191698235  
"Hrk",4.42255347267798,-1.72993095655726,1.00064742947306,-1.728811672  
92684,0.0838428063136816,0.172389226774667,-3.0412193350706  
"Oacyl",10.672872252264,-1.1619439805084,0.582668693078275,-1.99417609  
75174,0.0461328133335118,0.10922860891036,-2.57290680568518  
"Vwa5b2",9.13185988129946,-1.23757121631756,1.10795242088134,-1.116989  
49611311,0.263998816367733,0.405905292806102,-1.1158380378877  
"Olfrm12a",273.989058333291,-1.83409961544507,0.395860463874668,-4.6331  
9725716726,3.60061157851687e-06,7.71480489647494e-05,-17.3685276848937  
"Gjb4",132.698528460277,-1.84691362143052,0.698396019547111,-2.6445076  
5717162,0.00818098556690927,0.0289664321535938,-6.54106184528509  
"Pkd1l1",4.50838276199851,0.0524297046296614,0.998021787998271,0.05253  
36272816443,0.958103501621735,0.974604489440235,0.001348677716399  
"Gm7729",4.70200286761839,0.0664105132661375,0.878870984988806,0.07556  
34380932298,0.939766425441317,0.962574372938369,0.00253315898006209  
"Ttc34",2.58027989674788,2.26326112660752,1.41434351561163,1.600220244  
67569,0.109549732560803,0.21120104282345,3.51924609621212  
"Olfr1440",15.2479251676731,0.200693239641726,0.538824919179701,0.3724  
64658737867,0.709546920393719,0.807368060385607,0.0429434623783807  
"Tas2r143",0.549370029759281,-0.979283874410449,3.14098814270727,-0.31  
1775731049525,0.75521096917985,NA,NA  
"Zfp316",812.413909545138,-0.0369431364422547,0.100904437113968,-0.366  
12003890898,0.714275505198425,0.810507117520741,-0.00776157402146751  
"Rbm12b1",734.89559148077,-0.258902128878556,0.155315540974106,-1.6669  
4283942726,0.0955257714377488,0.190660404493114,-0.429068509844008  
"Cxxc5",4414.40570927013,0.571675174119087,0.206106965161482,2.7736819  
7465421,0.00554258319918551,0.0214423188924046,2.19659828131859  
"Mtf1r1l",4393.58301380217,0.234144983548173,0.170837890004331,1.370568  
22431041,0.17050959412173,0.2950790714665,0.285776743355889  
"Tmem251",686.424237380865,0.130964653399528,0.122426552322078,1.06974  
05988775,0.284736086515882,0.428907927602493,0.110863282175135  
"Olfr981",15.0208747928554,0.650716682969951,0.712639822101462,0.91310  
7382984985,0.361186067737325,0.506132177830661,0.443110355406703  
"C87436",799.346174850244,0.183612541125833,0.183687503788908,0.999591  
901128117,0.317508044121262,0.462550197569962,0.141565304577812  
"Gm5424",5.93513203342436,2.82467374192948,0.919562513385542,3.0717582  
5548816,0.00212801991144626,0.0104831056678573,12.8748355210038  
"Tifa",715.808440340563,-0.663572084104329,0.282424493689706,-2.349555  
71818562,0.01879583076368,0.0548132079315334,-1.92689660554344  
"Chtf8",2301.47409565984,-1.42505276973564,0.281105933011779,-5.069451  
05877905,3.98964708108788e-07,1.32747677111009e-05,-16.0028374075502  
"Tent5b",168.961383113263,0.674396348073769,0.303977761864684,2.218571  
33211599,0.0265159016940027,0.0717467459380606,1.7767732361732  
"Slitrk4",57.35068006434,-0.0862468283338324,0.552910785031116,-0.1559



86880105764,0.876043362788163,0.922554333656149,-0.00695227114832275  
"Csnk2a2",2538.84458289929,-0.0638180940929301,0.135062335827669,-0.47  
250844361494,0.636563916305151,0.751087639341473,-0.0182668405166236  
"Mapk10",31.2523997726139,1.53201996380484,0.704718240178532,2.1739468  
0094661,0.0297091307022138,0.0780580286257599,3.90711476068167  
"Hmga1",1297.40676583741,-0.618883562901366,0.190087758161374,-3.25577  
811473777,0.00113082086162906,0.00646211757328355,-3.1202860440779  
"Foxc2",695.961172331178,-0.544486490605175,0.345286865892952,-1.57691  
051814864,0.114816116003565,0.21900651827798,-0.826886470264801  
"Bst2",3332.60867868298,-1.13158021429251,0.252623847430894,-4.4793087  
6597884,7.4885145329728e-06,0.00013532071952169,-10.0799614057389  
"Nxph3",251.552756152119,-0.627651903946894,0.390503928953217,-1.60728  
703967044,0.107991416019271,0.208807678455349,-0.983117318501308  
"Rpl14-  
ps1",6.52569162190612,0.600903753640227,1.87849203972559,0.31988623903  
2457,0.749054569881638,0.836582999401546,0.107218981091483  
"Cdc42se1",6117.42445092268,0.178906558658487,0.207526006360462,0.8620  
92235070222,0.388636763990306,0.532848577757048,0.112624897104886  
"Cystm1",6384.08822015949,1.23426102210249,0.401929032655641,3.0708431  
6339986,0.00213455241080887,0.0105029150531929,5.62341964975168  
"Kctd11",728.792553368934,-1.10596650321853,0.17945358633763,-6.162966  
84724774,7.139445925994e-10,1.2039002610187e-07,-17.6208435483433  
"Gprc5a",788.340020528474,-0.359017675841839,0.415711982273959,-0.8636  
21187626107,0.387796021056248,0.5320700034167,-0.226533049547366  
"Fat4",416.137040392474,-0.928130713541192,0.189301760732059,-4.902916  
43327545,9.44241607533612e-07,2.65364691272972e-05,-9.779704583342  
"Gm9812",10.6059143441342,-1.90415851618142,0.74614338702484,-2.552000  
79407529,0.0107106274654254,0.0357901995408507,-6.34100243636955  
"Tmem45a2",2.13237627659063,0.41702777847011,1.07187367980892,0.389064  
295845431,0.697228584550327,0.797943472534031,0.0941304761212449  
"Selenov",2.55313417306364,-0.38704217847533,0.889760273348626,-0.4349  
96020915489,0.663565315682264,0.771830610581208,-0.100240119359847  
"Cc dc66",808.601051053106,0.258463654555174,0.2046023860237,1.26324848  
687363,0.20649989259629,0.339523977295054,0.279195207579242  
"Mrps7",4014.6691362473,0.662557301430591,0.232217761190286,2.85317237  
593929,0.00432851351718856,0.0178070294681291,2.66888813497217  
"Fam83h",1657.65302222745,0.281572317484758,0.155391939451467,1.812013  
66350602,0.0699840853118076,0.150049449682167,0.534083661577354  
"Rhoj",1500.88739251295,-1.335850369854,0.22320476661896,-5.9848648847  
83,2.16569565148413e-09,2.70684191106651e-07,-20.2011474703116  
"8030474K03Rik",1.92531998095606,-4.44606479568056,2.41796176701896,-1  
.83876554887053,0.0659496775003846,0.143306231126992,-8.63768780326001  
"Ttc6",163.545711283106,-2.22270256708502,0.7713109945326,-2.881720321  
42746,0.00395510619327761,0.0166666653461264,-9.10051034509174  
"Epm2aip1",1949.66064507277,0.0545131561553668,0.13996054084496,0.3894  
89464861053,0.696914102446843,0.797817706053813,0.0123131671140968  
"Olfr1341",0.0809400108165231,-0.0719579730135645,4.78471990596623,-0.  
0150391192019072,0.988000971296028,NA,NA  
"Riox1",396.18604057999,-0.176287559167682,0.171379912361208,-1.028636  
06789651,0.303650722603824,0.448359090445237,-0.141410974156091

"Zfp787",2007.1059779867,0.857051739324382,0.15730984050682,5.44817626  
515378,5.08889137194516e-08,2.76387754791606e-06,10.9692988990847  
"Gpr61",0.296453422874358,-0.434729465217333,4.76938232601723,-0.09115  
00558145362,0.92737335936005,NA,NA  
"Ppp1r3b",1057.42287904768,-3.89538891935672,0.812285305022617,-4.7955  
9201092314,1.62195098840223e-06,3.99807842880742e-05,-39.4490383587621  
"Clnd12",2259.48237444713,0.638075328637137,0.156404650274025,4.079644  
2274524,4.51046783474068e-05,0.00053592383815828,4.80567614201009  
"Phgr1",0.178275448021284,0,4.78471990596227,0,1,NA,NA  
"Mpeg1",7777.1384443373,-1.27682762992241,0.405998996197003,-3.1449034  
1572877,0.0016614167074819,0.00871283027500865,-6.05594058222949  
"Cyren",509.264052870648,-0.426152420053152,0.135916800644016,-3.13539  
178404664,0.00171624735448852,0.00891881421050566,-2.01126567062234  
"Lrrc75b",245.320291411894,0.877738098528119,0.476410428117363,1.84239  
900456564,0.0654168073049884,0.142461894927875,1.71043130897488  
"Atp10d",628.613420346027,-0.492852643467275,0.20133792813732,-2.44788  
772799495,0.0143696424042566,0.044850214118488,-1.53002501219201  
"Gltpd2",8.6078367406348,1.80734402136681,0.743970588133196,2.42932187  
131466,0.0151270961830885,0.0464485230516316,5.54748091645545  
"Gchfr",847.236539612416,2.16089122577171,0.64344863895192,3.358296365  
80081,0.000784244805746013,0.00488224943245075,11.5005855432078  
"Ddit4l",858.800457335454,0.158389680951077,0.486628738399126,0.325483  
615028852,0.744815081434813,0.83409364527115,0.0287334084166388  
"Slc39a3",1324.95731174736,-0.0859029807541649,0.147430249322642,-0.58  
2668625664274,0.560116397833208,0.688466842649681,-0.0320665622565912  
"Fam187b",254.242904162825,1.21897048589733,0.285946944594316,4.262925  
37458908,2.0176791579021e-05,0.000290783946044037,9.92599136311314  
"Mettl21e",1.23859900251847,-0.195233022563767,1.33936262406215,-0.145  
765619449381,0.88410641765991,NA,NA  
"Krt1",7.91727302838028,-0.888022157463168,1.02163071933238,-0.8692202  
97176924,0.384726647625439,0.529311330468587,-0.564940598624306  
"Brox",2523.65017316375,-0.15573586355863,0.09771596599656,-1.59376067  
125113,0.110989649403317,0.213272512473231,-0.24064064709437  
"Ckap4",1960.30465260282,-0.878048058282301,0.216895026921985,-4.04826  
27506168,5.1599201964436e-05,0.000592160823956782,-6.52541811383141  
"Vat1l",90.3191185626943,-4.11101268364945,1.56158099951238,-2.6325965  
0631838,0.00847349462488196,0.0297365367523305,-14.4517668163818  
"Il1f10",1.5059928401618,1.02715931757595,1.41538004153011,0.725712732  
578546,0.468014894585521,0.606335841503554,0.513909636308517  
"Spesp1",0.110547637579088,0,4.78471990596623,0,1,NA,NA  
"Pip5kl1",3.17107485028635,0.503071546195125,0.950547912935737,0.52924  
375441676,0.596636367698793,0.719227062271019,0.165801398686595  
"Gpr1",7.90152712113004,-2.34989778930099,1.1078538122538,-2.121126238  
2357,0.0339111804474211,0.0864201014722019,-5.75380692314326  
"Hectd3",2599.19147068612,0.313565899949129,0.113284359462536,2.767954  
03563922,0.00564094107574582,0.0217494698625454,1.20038228429628  
"Pramef8",667.948519823189,-0.341539030178754,0.115936316604258,-2.945  
91927863791,0.00321996419167218,0.0142571104817115,-1.45171148231431  
"Fbl",2346.54004822326,-0.296135641196027,0.123742287509543,-2.3931644  
3195046,0.0167037532186858,0.0500830048066946,-0.886651891659377

"Mbtps2",988.61072198704,0.166885602780152,0.224970850422473,0.7418098  
94334123,0.458202524933939,0.597994165405752,0.0858082849732177  
"Atxn1",1821.08826654222,0.126753297591065,0.148953320404695,0.8509598  
66129103,0.394791647416399,0.539050948272055,0.0783265904165595  
"Irgm1",3138.32680236953,-0.318817307960545,0.345927018325732,-0.92163  
1705738406,0.356720714584374,0.50179211405859,-0.219846647160632  
"Olfr374",313.265790835169,-0.192378073683451,0.256353224305,-0.750441  
404452811,0.452988901955326,0.593533876105432,-0.100356135993961  
"Zfp474",0.21705269860567,-0.0600504268427031,4.78471990596324,-0.0125  
50458129819,0.989986446107058,NA,NA  
"Zfp740",5791.37774001111,-0.160606303294815,0.0968021547376126,-1.659  
11909430268,0.0970917963541989,0.192858174950506,-0.264325886890766  
"Ltb4r1",101.723592248333,-1.16046930409334,0.464408904754943,-2.49880  
932990657,0.0124611336741994,0.0400605415300147,-3.73365150162829  
"Tefm",521.92454350173,0.572543011475307,0.235144099922052,2.434860205  
57224,0.0148975439546763,0.0459765023287349,1.76321767549652  
"Myct1",512.439394029896,-0.554676316125649,0.164375828434075,-3.37443  
966920057,0.000739661270906328,0.00466577659661326,-2.97722567345085  
"Gpr6",0.147840099652982,1.35969895153643,4.78471990596623,0.284175245  
000439,0.7762760853899,NA,NA  
"Vmn1r179",2.50367322532395,1.91838753704913,1.48122136812404,1.295138  
98349898,0.195272288948574,0.325810293506699,2.15135649797842  
"Vmn1r193",0.449553789386647,1.93223213651096,2.62373315890372,0.73644  
3845272094,0.461460629918515,NA,NA  
"Csl",0.174916656736116,-0.543825578326908,4.78471990596623,-0.1136588  
11594968,0.909508264451127,NA,NA  
"Adck2",964.424840955589,0.165606807556961,0.183451012956412,0.9027304  
06816067,0.366668994402218,0.511542075905442,0.111010455668802  
"Nqo2",1457.04201005291,0.746466971707228,0.20332787079679,3.671247669  
00875,0.000241369302571416,0.00195522171231303,4.65590237643747  
"4930432E11Rik",7.10784035065527,-1.18795594730695,0.758956335135242,-  
1.56524939882775,0.117524442787886,0.222951117481826,-1.78288753557149  
"Slc26a1",3739.42105547253,1.93513767445949,0.773936318097631,2.500383  
59643871,0.0124058895105874,0.0399158471414907,6.23304335082044  
"Gpr156",17.8458952088722,-2.07742298880598,0.690828558076554,-3.00714  
694625547,0.00263712252242831,0.0122952211722399,-9.13763769982569  
"Zbtb21",1001.41952903839,0.233792161834933,0.208477592993441,1.121425  
84955059,0.262106638099717,0.403741130484142,0.212045135827265  
"Pla2g4f",15.8706931944248,-2.03024516075592,0.521937472732884,-3.8898  
2448438792,0.0001003167507627,0.000993385478096052,-14.0379104382938  
"BC053393",0.775333285420099,-2.69023797762836,1.86938366376863,-1.439  
10425118668,0.15012098774082,NA,NA  
"Tshz1",3819.6579498197,0.523669850743552,0.147201450832433,3.55750468  
342646,0.000374394428256593,0.00274743792327702,3.08812638938588  
"Tapt1",2155.9966527397,-0.0389243636147125,0.208275324705691,-0.18688  
8982983057,0.851747677318068,0.905725142470969,-0.00385426688617051  
"Wdr27",102.192437020089,0.813526709396753,0.286665067790926,2.8378996  
9829908,0.00454114503158123,0.0184311502551563,3.24899227419073  
"Gm5637",0.162627472229157,-0.543527872648682,4.78471990596067,-0.1135  
96591510314,0.90955758944225,NA,NA

"Mars2",538.506740806028,0.171389216374499,0.129474987061147,1.3237245  
2984728,0.185594548676764,0.314070691728827,0.198492224680122  
"Spsb4",1244.51422717584,1.53493682155269,0.585669129850272,2.62082589  
52373,0.00877170463059194,0.0305630266060189,5.35380480783162  
"1110032F04Rik",79.8773522713953,0.861196909210788,0.474241400817558,1  
.81594628331931,0.0693786125645541,0.14912845196601,1.63881229068921  
"Msgn1",0.170959733933281,1.33484854833491,4.78471990596623,0.27898154  
4284429,0.780258988216428,NA,NA  
"Zfp41",265.770655635407,-0.541316300975263,0.155661137028637,-3.47753  
017425072,0.000506056087902426,0.00349524675944793,-3.06187516393815  
"Fbxo41",17.330622525278,-2.2715701995078,0.775114044732659,-2.9306270  
6700313,0.00338278615258831,0.0148219245849813,-9.56705364128029  
"Catsperb",0.520113269193673,-0.568692177230875,2.3458072905797,-0.242  
42919676933,0.808447613248521,NA,NA  
"Cfap65",261.786657314869,0.798036029236969,0.561328724739792,1.421691  
05920404,0.155115956789861,0.275088091869588,1.02999629267064  
"Mipol1",321.962008937899,-0.20818552371277,0.24486199991808,-0.850215  
728787721,0.39520515855721,0.539539993106601,-0.128458455602271  
"Ccer1",0.118313186368239,0.895636117808525,4.78471990596623,0.1871867  
39330703,0.851514221559173,NA,NA  
"Acsm4",0.0804673502708677,-0.544048378937456,4.78471990596623,-0.1137  
05376621746,0.90947135024012,NA,NA  
"Spata2",1013.13535030364,-0.204762727654984,0.180061133006334,-1.1371  
8448971318,0.25546116949417,0.396196459019831,-0.189578564399395  
"Vmn1r68",5.21574441695606,0.572505193573924,0.808701745888896,0.70793  
1195257464,0.478987986301653,0.61645595755179,0.276959920584632  
"Pcdhb15",36.8616542075741,-0.627771935467251,0.378682647248845,-1.657  
77845916114,0.0973621906835988,0.193257456372677,-1.03188882416651  
"Ankrd33",1.21422238760543,2.61137053573311,2.11486443129793,1.2347697  
077351,0.21691622425927,NA,NA  
"Zfp445",4950.20491437945,-0.0369853069946807,0.158970401391155,-0.232  
65530357237,0.816029079386172,0.882553161880229,-0.0046208056312173  
"Nipa1",301.667675429428,-0.545898004078462,0.247524114183846,-2.20543  
362362263,0.0274236807764812,0.0735445781630849,-1.42471930340439  
"Prr15l",3472.86397608215,1.33593342348938,0.496498843089415,2.6907080  
2899895,0.00713005658639769,0.0261319254363876,4.86893963592607  
"D030056L22Rik",869.853889508879,-0.070432135088293,0.144369295655081,  
-0.48786090400112,0.625648368494652,0.742564703306792,-0.0209637918369  
459  
"Tmem164",1946.82832539411,-0.338701504717835,0.173378356653392,-1.953  
53971081262,0.0507556765797879,0.117785548911296,-0.724445156451018  
"Olfr432",38.5123744283814,0.898600529454963,0.454396526199366,1.97756  
910021073,0.0479773380076961,0.112809904921822,1.96079230447428  
"Olfr914",332.193963010282,0.924150581747803,0.278269768381351,3.32105  
9945259,0.000896762742598885,0.00542004958313486,4.82189457432665  
"Dusp28",571.756844179692,0.348040105042701,0.20677468554316,1.6831852  
7061697,0.0923392313044247,0.185628401040984,0.58610247695607  
"Ngrn",1450.77980313098,0.051528628623057,0.201650553138986,0.25553427  
8587083,0.798310471676483,0.871233492485619,0.00710297741706975  
"Lrrc4b",7.05226751972332,-1.41428634779253,0.991622554144863,-1.42623

455051621,0.153800649624098,0.273264540401919,-1.8347748091724  
"Tmem198b",664.771839462936,-0.443184999701377,0.153910305636145,-2.87  
95017842996,0.00398304044039493,0.016730142720125,-1.81286740159719  
"Ofcc1",1.97862295330844,-4.8854512097242,2.24117886889216,-2.17985778  
713822,0.0292680048312582,0.0771589451324868,-12.5159776670593  
"Rnf31",1749.10465625374,-0.07608685975241,0.219666475971462,-0.346374  
472553994,0.729061307080647,0.822165261160119,-0.0148988614365826  
"Pbp2",10.2989901167228,-3.25466849391451,0.894454564032917,-3.6387186  
3903278,0.000273997952092935,0.00215159567857755,-19.9886947600792  
"Dnajb7",4.2816040706051,-0.511955349841028,0.817952958906446,-0.62589  
8279682834,0.531381662981181,0.6637136065851,-0.209852821118824  
"Clnd14",18.7260006812265,-0.732672785416782,0.71482828875827,-1.02496  
333306774,0.305380489115297,0.449993105862309,-0.585056082821853  
"Fam221a",130.857015957849,0.191114101498507,0.289716750458217,0.65965  
8446383375,0.509473038430373,0.643791659320506,0.0841628501088751  
"Ankdd1b",9.23239243163455,0.509797388082875,0.666471541767769,0.76491  
9964520426,0.44431920483051,0.585558354564737,0.272838175941034  
"Ticam1",839.056337672289,0.225931749786697,0.153695077293882,1.469999  
9099821,0.141561778363473,0.256426194215068,0.307473771166122  
"Cltc",11451.904576197,-0.545152196370923,0.179610468926135,-3.0351916  
546419,0.00240382880708338,0.0114877093334588,-2.43491005664531  
"1700113H08Rik",0.264523067411562,-0.271826437798885,4.02718231441617,  
-0.0674979220150585,0.946185316246478,NA,NA  
"Cd24a",8022.23131280784,-0.178328510525509,0.42287048942116,-0.421709  
518603702,0.67323705586359,0.77924218875599,-0.0444810839223154  
"Zfp654",885.571265168205,0.0345614320466088,0.122689956427496,0.28169  
7321060123,0.778175608824139,0.856649976273785,0.00534754774207401  
"Dmrta2",43.5137047907369,0.540391597076095,0.267558787152947,2.019711  
64104278,0.0434133069016052,0.10448775820607,1.22057458941124  
"Tet1",234.113421021939,0.512551692834336,0.361454047701052,1.41802725  
988077,0.156182806249223,0.276589678133274,0.658741777587028  
"1700001C19Rik",3.55358899381879,0.875594071447811,0.816091383252449,1  
.07291179568423,0.283310693099963,0.427288976954136,0.744513027755212  
"Khnyin",2627.71174359783,-0.296905376434488,0.117024744080405,-2.53711  
622074123,0.0111769841670615,0.0369684202356855,-0.979102258361179  
"Cyp4x1",62.2634193784058,-0.0711973875910652,0.31135957642229,-0.2286  
66124257896,0.819128426129254,0.884056573268471,-0.00877395463134947  
"Chst9",50.6397971283958,1.58030178091852,0.458529518805544,3.44645593  
381896,0.000567991189528745,0.00380966364411127,8.80261969869009  
"Helt",0.125633388153494,-0.0309088942759046,4.78471990596537,-0.00645  
991717035907,0.994845767673871,NA,NA  
"Neurl3",1956.20353435635,-0.978480323386359,0.290716823837956,-3.3657  
5059698561,0.000763356934838086,0.00477355148026716,-5.22964924990751  
"Samd14",1085.1393891543,-0.493229574191529,0.29875980258547,-1.650923  
48409363,0.0987541998615876,0.195443502730535,-0.805189353625295  
"Irs3",328.923288805119,-2.12169928894907,0.569319225604314,-3.7267304  
414267,0.000193979721323463,0.001653789508686,-13.5888176312735  
"Rab2a",7704.918247513,0.221573423976249,0.176538513541765,1.255099635  
3769,0.209442592827847,0.343024920198014,0.237072968194437  
"Gm9818",1.82695297901727,0.82641781909736,1.18270406514041,0.69875283

5519552,0.484706508352255,0.622172975632144,0.392165939256037  
"Dync2h1",954.539559612253,0.91652043306279,0.314721378533756,2.912164  
52257782,0.00358933528067768,0.0154902300360012,3.81964085764154  
"Gjd3",10.8633736528319,-1.47246915342753,0.825889679123889,-1.7828884  
3007402,0.0746044668445327,0.157598905150022,-2.72068427128852  
"Dusp18",533.18330797733,0.325661923399887,0.184059997725971,1.7693248  
2572739,0.0768396827835874,0.161064301753858,0.594642911379754  
"Ythdf3",5205.98566802371,0.10671365572724,0.085731929948099,1.2447364  
2191239,0.213228653178171,0.347669247015251,0.112743371131722  
"Rpl9",17032.6789908408,-0.569411614713522,0.288743791585273,-1.972030  
6767024,0.0486061046738264,0.113951028577994,-1.23675433825504  
"Cdh19",71.838218509826,-1.71292621542875,0.52105614466093,-3.28741198  
617553,0.0010111279010396,0.00592219039185042,-8.78568232084691  
"Ccadc36",28.3306180438989,0.17098717822755,0.494607156928206,0.3457030  
0051758,0.729565929062841,0.822544031737439,0.0334029033258512  
"Fam185a",457.481808683239,0.082173876205951,0.131286859545379,0.62591  
0898398389,0.531373385725752,0.6637136065851,0.0336834447563494  
"Rnase2a",1.04937036671819,-1.82891877170965,1.97459943185094,-0.92622  
2676968598,0.354330269945425,NA,NA  
"Olfr684",0.143520032595355,1.5495926402256,4.76370967376985,0.3252911  
58854209,0.744960721552854,NA,NA  
"Gm527",105.245316787912,0.24441483823519,0.318370840775363,0.76770484  
8974046,0.442662554740607,0.58408570699955,0.1314237034505  
"A2ml1",2.09001002163098,-3.29781593509428,1.91587968805991,-1.7213063  
8246589,0.0851952419296169,0.174580263601742,-5.75591124034765  
"Clon2",9651.65440364325,1.26050140552365,0.659204948906724,1.91215403  
891334,0.055856439289811,0.126520545222204,2.60589830068044  
"Fbxw21",0.338652241692995,1.46480691389144,3.74278118346916,0.3913685  
68475521,0.695524821961819,NA,NA  
"Mageh1",612.491307301693,-0.739427030707225,0.217967419902396,-3.3923  
7410360839,0.000692897656516004,0.00442954705139313,-4.00729369697044  
"Taf9b",667.697960009484,0.236075233131684,0.194459759100332,1.2140055  
8256313,0.224745592380025,0.360933165326228,0.240575411453401  
"H2bc6",199.983302337519,-0.799294103494278,0.396759904477262,-2.01455  
362418076,0.0439514408350207,0.105411078454253,-1.79832184402686  
"C2cd3",1027.01580936647,0.238528983171132,0.124237775714402,1.9199392  
6001592,0.0548655721121306,0.124696226255079,0.496587452738858  
"Ptgs1",1942.37648649159,-0.893954350427429,0.318708882901929,-2.80492  
448873009,0.00503283687886886,0.0199817254050468,-3.49798719076735  
"Prss45",0.395736399883915,-0.05919416732367,4.75501786620883,-0.01244  
87791611318,0.9900675678488,NA,NA  
"Mc4r",17.549435044436,-0.0783551769927182,0.534147206726641,-0.146692  
102862232,0.883375052174399,0.927515278948236,-0.0058959145394155  
"Emc6",3483.54814427443,0.308319704048246,0.346080497998481,0.89089014  
2124099,0.372988109326723,0.518281225459838,0.202639202965303  
"Gap43",15.7521809988202,-0.974807101194286,0.726572695104445,-1.34165  
116272936,0.179709128898674,0.307123200566775,-1.15076593118365  
"Zfp358",929.567361277733,-0.31289594680925,0.191450285047325,-1.63434  
568265023,0.10218628656411,0.200644451889901,-0.502579988431807  
"Sfn",2234.60166644712,-1.54102446575208,0.325833538054353,-4.72948387

987922,2.25091325650303e-06,5.24270757883956e-05,-15.1884717992929  
"Neurl4",4771.18136297767,0.410411331706111,0.177157445698758,2.316647  
37593915,0.0205229483800623,0.0585966389682904,1.16436893531817  
"Olfr370",0.733941242170314,2.60528774928346,2.43198246074093,1.071260  
91217357,0.284052129935892,NA,NA  
"Gpr15",2.78791908213297,-4.03376555156479,1.39366865650712,-2.8943504  
8476615,0.00379943806763819,0.016153825434542,-16.6416966585199  
"Smgc",0.265666779130041,0,4.78471990595838,0,1,NA,NA  
"Kcnv2",2.57298426463078,-1.96175476271466,1.50584092475551,-1.3027636  
1232058,0.192655477120907,0.322686753105699,-2.21888829779634  
"Pcdhb13",19.2789333911992,-0.712755851615673,0.384680219382506,-1.852  
85287806011,0.0639034487226081,0.139897617487064,-1.40187987496793  
"Kcne4",221.045045194561,-0.564360469830162,0.278146195213869,-2.02900  
661429584,0.0424576166237374,0.102569521611898,-1.28516981729516  
"Zfp286",136.080162472726,-0.198051892261946,0.28714480561417,-0.68972  
827782253,0.490365079475179,0.626877676344547,-0.0924909963706599  
"Mettl21c",1.65934129795106,-2.80026443778894,1.69461829085792,-1.6524  
4554062454,0.0984437583142768,0.194928038957222,-4.57878188343584  
"Lanc13",69.5578625012697,0.355674098779568,0.283327331466636,1.255346  
940722,0.209352841781523,0.342993169402247,0.380587200791806  
"Tdg-  
ps",31.4288260977003,2.33078239392536,0.751446062085545,3.101729467390  
6,0.00192393695478379,0.00969576705721747,10.8056607175275  
"Olfr976",36.8359838220218,0.736485678263671,0.467555690110905,1.57518  
279392338,0.115214257573615,0.219508265992803,1.11678139193545  
"Gm973",72.6786253538128,-1.07003607315873,0.45427467457081,-2.3554825  
5946621,0.0184986653841949,0.0541158544620746,-3.12089725503485  
"Cstad",59.6298072192935,-0.828297688967195,0.401404276965724,-2.06349  
990894074,0.0390651564451629,0.0962705283579104,-1.93870781157231  
"Abhd17b",1478.41585259756,0.224270463098959,0.111635608178194,2.00895  
096787554,0.0445423339147748,0.106396690956104,0.502496094208577  
"Dnah14",1.93633197576868,-0.242937677420452,2.17673569625338,-0.11160  
6419575238,0.911135481742701,0.945280083387515,-0.0136710774985698  
"Gm7367",1.6185390423641,2.77297339770518,2.34256252557318,1.183735062  
53656,0.236517954822901,0.37465489342245,2.72236652488478  
"Zfp768",1268.57649138014,0.428145545613831,0.150096119665051,2.852475  
777317,0.00433801184312404,0.0178301974799365,1.72408293025189  
"B4gat1",1533.39871073034,0.206188220650042,0.20867784521674,0.9880695  
30983935,0.323118596674331,0.468111873190333,0.156506749570311  
"Atmin",1041.15235458208,-0.188416527332577,0.166485845495006,-1.13172  
700521396,0.257749224355765,0.39866685518711,-0.173273332810418  
"Defb9",0.440613835344313,0.600114752507314,3.03830979466671,0.1975159  
85223338,0.843423773435843,NA,NA  
"Odf3b",62.5588978490389,-0.175197276818044,0.388728537077441,-0.45069  
3118995639,0.652210742376481,0.763134120245071,-0.0473595876883275  
"Tgif1",1749.49182729503,-0.481427451486406,0.188991440581398,-2.54735  
055728122,0.0108544332971584,0.0361159966600673,-1.59882990175321  
"Ctdspl",4479.41196561374,0.0773026836084057,0.161022750485591,0.48007  
3054119908,0.631175447711317,0.74661200761491,0.0225885885418156  
"Zbtb44",2479.88312395948,0.248701454688329,0.188290537085696,1.320838

84053684,0.186555105902012,0.315269004996457,0.287083306581767  
"Flrt2",558.150846556143,-1.08530350621557,0.316784730019492,-3.425996  
91010607,0.000612547350458239,0.00402542913354727,-5.98558315042919  
"Gpr68",243.165007792585,-1.42352838200708,0.463566555044262,-3.070817  
69924312,0.00213473445254916,0.0105029150531929,-6.48574112931282  
"Rexo1",1701.08527144873,-0.0804897855088286,0.132600122343246,-0.6070  
1139702175,0.543843348650173,0.674159680334482,-0.031736179221613  
"Cmya5",64.6256089726385,-0.356039002227504,0.222665019674981,-1.59898  
938210953,0.109822961880679,0.211589568760367,-0.55296662290627  
"Fam180a",204.758425083086,-0.482832534106809,0.293747536859512,-1.643  
69900516895,0.100238391563967,0.197698579679772,-0.782677202885903  
"AI837181",1653.57723740035,-0.0340198733581727,0.0969265084253731,-0.  
350986266923725,0.725598651220455,0.819350350466,-0.00677823891821785  
"Dlk2",74.1737158474257,-1.01441320950666,0.460490966879706,-2.2028949  
1535598,0.0276021560903956,0.0738557485179819,-2.64319708844094  
"Xxylt1",602.062557855554,-0.434211923967598,0.196537332595643,-2.2093  
101510691,0.027153075614552,0.0729745924648566,-1.13661221442096  
"Erfe",14.3823671457471,-1.00303404958621,0.79540341011367,-1.26103815  
60256,0.207295100324947,0.340358215204035,-1.0810266089554  
"Arl4a",2469.73210283915,-1.25880982627139,0.506182399000157,-2.486870  
0072501,0.0128872479087791,0.0410849509034295,-4.01826369258878  
"Gphn",1938.94855532623,0.430817026055682,0.191492758239662,2.24978234  
172435,0.0244627654895666,0.0672269205800662,1.16306875848934  
"Dynlrb1",4884.29338392183,0.162391929779066,0.156214105633279,1.03954  
71594626,0.298550337204794,0.442873894919284,0.132263389318763  
"Gpr141b",98.9950764063239,-1.43509988068512,0.483005069988837,-2.9711  
9009686231,0.00296648098093636,0.0134169441350724,-6.18705553657734  
"8030462N17Rik",922.951325143682,-0.209752375262343,0.142497839203839,  
-1.47196881324142,0.141029299456844,0.255651662403268,-0.2860895403633  
92  
"Zfp30",542.683747724131,0.896579574078714,0.237685484262355,3.7721259  
1194284,0.0001618625346255,0.0014443055354957,5.86374398529876  
"Klhl34",0.0910088248646828,-0.544048378937457,4.78471990596623,-0.113  
705376621746,0.90947135024012,NA,NA  
"Inhbe",1.44477936503259,0.725715112434474,1.54318053620608,0.47027233  
3928376,0.638160460866846,0.752370526252533,0.206485075926366  
"Dlga2",0.48525225490384,1.00592051155983,4.61290903372628,0.21806640  
9765565,0.827377368717137,NA,NA  
"Rnf152",1644.18976498658,1.03240410016756,0.226756985719638,4.5529097  
8970774,5.29089647160185e-06,0.000103680300907832,9.47148006774875  
"Adamts12",240.222565281691,-1.88672752739103,0.382354484991426,-4.934  
49822468627,8.03570765204929e-07,2.32808659434855e-05,-20.127380475566  
6  
"Cldn4",3723.69519740036,-1.30111377318965,0.290150920600933,-4.484265  
53496679,7.31655058874285e-06,0.000132581880464041,-11.6167472913842  
"Mroh7",661.89130320117,1.79024815596265,0.502630422524294,3.561758452  
60565,0.000368379227462398,0.0027164945413154,10.5775254804754  
"Baiap3",368.208137585728,-0.336783524039514,0.291539432807261,-1.1551  
9029723216,0.248012507182443,0.38735564442833,-0.319409545739558  
"Olfr1396",52.3068679523164,-0.45796576636292,0.489786308838863,-0.935



031784470702,0.349771919458592,0.494801776507554,-0.322223819316647  
"Tspyl1",2666.48501409452,-0.620162360659657,0.274564847622204,-2.2587  
0997700692,0.0239014314515968,0.0660134989019576,-1.68553681740399  
"BC049715",34.4151006619451,1.14583909974125,0.701041465366422,1.63448  
120596167,0.102157849349502,0.200611717858454,1.84065758621248  
"Dmbt1",0.258298194424544,2.30192066631965,4.7163227478243,0.488075305  
571815,0.625496501824565,NA,NA  
"Slfnl1",4.05999580768796,0.448958143482124,0.764719195904851,0.587088  
889472555,0.557144009118356,0.686379430794964,0.168954037782079  
"Flacc1",137.937695371333,0.349942850837611,0.672452044072495,0.520398  
2260479,0.602786046245098,0.724338859218965,0.112855155099907  
"Rtp2",0.081018275684709,0,4.78471990596022,0,1,NA,NA  
"Mis18bp1",100.185475554709,-0.413584443668,0.468006203418046,-0.88371  
5729935669,0.376849686809875,0.522084353660575,-0.268799327431911  
"Olfr67",0.10500178835157,-0.544048378937456,4.78471990596623,-0.11370  
5376621746,0.90947135024012,NA,NA  
"Fbxo28",1578.45758102882,-0.233687386485043,0.151027717203276,-1.5473  
1456458758,0.121787411382114,0.229209550881125,-0.344249241341549  
"Cltb",4809.74464770199,0.409496439358386,0.189271975497864,2.16353444  
973161,0.0305000970510569,0.0796547865270732,1.03604775628373  
"Tmem41b",2267.04099088877,0.150110960396843,0.200185556142655,0.74985  
9097176179,0.453339571466709,0.593866036161221,0.0782230486411646  
"Lxn",536.894800266394,-0.459621488796194,0.222457995365647,-2.0661046  
05684,0.0388186034593314,0.0958082443354487,-1.07799924571348  
"Mmp10",4.6716504157677,-2.64818753874971,1.26247443255914,-2.09761676  
787514,0.0359390126579706,0.0903014006192152,-6.36783786755193  
"Tyw3",1079.53361395479,1.48098826864737,0.303491449415066,4.879835235  
89132,1.06174504330917e-06,2.92399786079693e-05,15.4614785075754  
"Nccrp1",981.848503187449,2.95540011129432,0.625248807673219,4.7267584  
9201929,2.28132325924579e-06,5.28364937233805e-05,29.1056918507586  
"Mafa",23.1798008488895,-0.988351323435598,0.425813083522507,-2.321091  
95720229,0.0202818813749428,0.0580897180761463,-2.81261718551103  
"Nxpe5",74.8799401594777,-1.29254527366958,0.455134384754535,-2.839920  
06968816,0.00451248390263087,0.0183491994021891,-5.16781487695121  
"Olfr1122",967.231787576367,0.432134058668544,0.425104157426333,1.0165  
3689129923,0.309373789156402,0.454434996306428,0.340824304070478  
"Zfp235",536.8289113251,0.039472521932307,0.116909305965795,0.33763370  
337564,0.735639240530986,0.82723882068592,0.00748643137988702  
"Frat2",104.772197994434,-0.214393359137932,0.23046099309832,-0.930280  
462023638,0.352225891104581,0.497275805313653,-0.149777444650214  
"Ankrd34c",0.67077704773887,-2.92898224965028,2.92361300838351,-1.0018  
365088852,0.316422561201745,NA,NA  
"A430005L14Rik",1143.0490392582,0.56128449008808,0.162300796720647,3.4  
5829781140364,0.000543600124332849,0.00369178517040818,3.1441165427374  
1  
"Paxx",1163.60271927463,0.031966855300995,0.213884868813399,0.14945823  
6472464,0.88119206163419,0.925925997938318,0.00246019997964213  
"Ddi1",0.33410169352658,1.55180651832756,3.81250482339258,0.4070307029  
66213,0.683985438147191,NA,NA  
"Apof",8.19413912038541,0.343563820932519,0.72133466122541,0.476289078

288391,0.633868445210737,0.748813507707904,0.0993810968302383  
"Fgfbp3",434.963562868706,-0.157160387270908,0.187820261167246,-0.8367  
59497054277,0.402727768304243,0.54651907199305,-0.0949541173016364  
"2810006K23Rik",519.883309623319,0.0418202100430421,0.184973643443534,  
0.226087399612736,0.821133444537335,0.885289460967042,0.00509540002376  
928  
"Cdcp2",1.25038999211103,2.04204235604623,1.44324998834914,1.414891649  
07738,0.157100266847403,NA,NA  
"Nr1h4",3082.8219600225,2.3639624613793,0.60546922823846,3.90434782004  
854,9.4479820133289e-05,0.000947617043703122,16.4568667482381  
"Krt87",1.36714852299574,-0.354990210732252,1.37698163460729,-0.257803  
155692409,0.796558828905887,0.869808694332829,-0.0495147385685777  
"D930020B18Rik",3.35696268141722,-0.0811296447981998,0.941651521674303  
, -0.0861567606814327,0.93134180282062,0.95715968719524,-0.003552264675  
83756  
"Gm5454",0.0942740624828791,0,4.78471990596623,0,1,NA,NA  
"Fbxo30",1004.09642472622,-0.0586593348032378,0.106496217411442,-0.550  
811439401746,0.581762941499399,0.706082404815144,-0.0204148168929601  
"Cd3eap",931.895222510186,0.295869451220794,0.197632088812255,1.497071  
92287919,0.13437454456382,0.246359649262375,0.414502101279594  
"Tssk6",21.8609968927324,-0.0507228221317489,0.369412720343142,-0.1373  
06647385161,0.890788416350353,0.93254188144962,-0.00354254354569347  
"Vmn1r74",25.3664636665146,0.0896467413984602,0.499483143420543,0.1794  
79012614008,0.857561595260831,0.909576020475204,0.00849642228031028  
"Trpt1",398.557225073206,0.42771422770018,0.221652483574115,1.92966133  
653613,0.0536488135153609,0.122640018396612,0.897559117096479  
"Crry-  
ps",0.203451760649242,-0.0567762545117845,4.784719905966,-0.0118661605  
334496,0.990532395897081,NA,NA  
"Gal3st3",23.4241066023931,0.0475690374569348,0.365692611820636,0.1300  
79295887625,0.896503690420148,0.936256373895564,0.00313317918978954  
"Msl3l2",126.345152368477,-1.38333011000512,0.255299160192075,-5.41846  
713856939,6.01121849218287e-08,3.13387000429363e-06,-17.5312771034271  
"Tctex1d4",6.9849252421287,-1.60826484244942,0.771399913739204,-2.0848  
6520908938,0.037081537500171,0.092504582673789,-3.82846978266175  
"Rps8",23251.5340938002,-0.0906150602377059,0.168760008147787,-0.53694  
6289777092,0.591304714979449,0.714505412287388,-0.0304615851484117  
"Rpsa-  
ps10",4.25945209286914,0.0769160752572293,1.12761029126571,0.068211576  
1562388,0.945617211995904,0.966485527048076,0.0026219886318301  
"Gpr82",26.0789088796206,-1.77290934302903,0.583477133189311,-3.038524  
12062531,0.00237740071914277,0.0113949260624006,-7.93303728448462  
"Rtl3",5.07964351805258,-6.04589601256524,1.77767083863643,-3.40102108  
959765,0.000671346482509642,0.004322956973571,-32.9127431879213  
"Yipf6",1824.67992007296,-0.315813585661584,0.25358831489614,-1.245379  
09323988,0.212992434569127,0.347379881993211,-0.333921179857683  
"Ccadc144b",96.4190977482719,-0.11750967215602,0.27671271270681,-0.4246  
63077480385,0.671082303359527,0.777512790475017,-0.0295719182025549  
"Olfr1388",92.4335897933214,0.210992115262795,0.331546986166846,0.6363  
86768892588,0.524524362580786,0.657315767182992,0.0885303411947604

"Champ1",957.4460120806,-0.249303200389202,0.184818205596105,-1.348910  
40406495,0.177365746028443,0.303970933995128,-0.296876033363176  
"Ust",252.57070808737,-1.75033982935855,0.284896915827074,-6.143765453  
8211,8.05878146964876e-10,1.32042118567405e-07,-27.7256364953743  
"Ppp1r2",4690.73146364859,-0.221062742737273,0.179291596973741,-1.2329  
7882593823,0.217583664103678,0.353007678706399,-0.230185000622103  
"Olfr736",0.191906843942146,2.0416586567276,4.73101917744957,0.4315473  
2207791,0.666070451835221,NA,NA  
"Ubiad1",1616.00120535054,1.37835242959205,0.305407710191888,4.5131553  
1204511,6.38702142840064e-06,0.000119744369048996,12.4467310464253  
"Clec2m",0.419496029866574,-0.0581340165710525,4.78471990594806,-0.012  
1499309706267,0.99030599617044,NA,NA  
"Bo1a2",2032.32760326053,0.721297166412017,0.192085669669616,3.7550805  
7239582,0.000173285723879177,0.00151444421523809,4.68317098974354  
"Ly6g2",1528.81889779399,1.86687813098843,0.587031544318999,3.18020070  
480905,0.00147173080649938,0.00792701858152624,9.03098241202252  
"Fcgbp",86.8697597669051,0.611784721614803,0.792367291497263,0.7720973  
94957799,0.440056745018132,0.581868060108743,0.331288497636998  
"Wbp1l",5066.70815155808,0.14845776001126,0.100369116828012,1.47911792  
693813,0.139108799730419,0.253087932923739,0.203983677499882  
"Tmem262",3.54235205713638,0.202423912093796,0.735455496657238,0.27523  
6112876774,0.783134843909275,0.859821318856139,0.0305722211106999  
"Samd9l",6574.17873340748,0.541338530458362,0.275728488927179,1.963302  
85841929,0.0496109935216472,0.115679879417015,1.16762853857441  
"Fbxo40",1035.21914674191,1.83465635001605,0.658209694553142,2.7873432  
5124395,0.00531421565240831,0.0208400194671475,7.10173480693704  
"Rnf150",1078.21359000608,-1.46540190745116,0.206290011710125,-7.10360  
087385284,1.2154755600715e-12,8.99945481602099e-10,-30.5223975575649  
"Zc3hav1l",205.95626725633,-1.13644117663034,0.273297345562213,-4.1582  
5910892956,3.20682161202316e-05,0.000410010542893295,-8.86347713038358  
"Utf1",7.26085805602239,-0.818564168129837,0.843939656418336,-0.969932  
105814068,0.332080335458591,0.476869949770855,-0.606156153185996  
"Fancb",103.676248755597,-0.668534640725134,0.24315293853867,-2.749440  
92694489,0.00596970222147302,0.0227427225311217,-2.52940754766885  
"Hs3st3a1",194.8370888287,0.00961516770083535,0.476567489728942,0.0201  
758783552445,0.98390307025277,0.989723009277618,9.93262554882123e-05  
"Lrrc49",485.245945001722,-0.508937343864489,0.234386512444548,-2.1713  
5934383125,0.0299040196430935,0.0784643486746114,-1.29530198859776  
"Atg16l2",1302.39098251986,0.268339108022933,0.285414049938082,0.94017  
483750764,0.347127886442968,0.491882233275072,0.190390878332766  
"Ankfn1",39.0225390898251,-4.26690208469765,1.28156187687445,-3.329454  
59887119,0.000870162495032336,0.0052953896155245,-22.3624870157509  
"Phf13",739.937788563034,-0.581832634802231,0.136247349111782,-4.27041  
435004269,1.95110140647931e-05,0.000283054875175101,-4.75349685654275  
"Lix1",217.219901550228,-0.311097435588166,0.309486238481439,-1.005206  
03796354,0.314797648369218,0.46004531164016,-0.24154547237606  
"Flrt1",2194.51334726604,1.60705681716073,0.472761143611497,3.39929970  
742555,0.000675586415305193,0.00434213493390558,8.74140738507663  
"Slc38a9",1709.71394032613,0.23248227817306,0.196387455455525,1.183793  
93242716,0.236494644665177,0.37465489342245,0.228239467515649

"Sned1",3857.25410406024,-0.62781032663845,0.365467325756408,-1.717828  
87933708,0.0858278322682629,0.175397869569918,-1.09282839670503  
"Gjb1",1136.43741927114,1.90892195815836,0.651842774711794,2.928500602  
00847,0.00340601173122558,0.0148996541937024,8.02972230099729  
"Cd300lf",162.672626566701,-1.27502906000866,0.553237333207634,-2.3046  
6923230962,0.021185105316381,0.0601349808500214,-3.58431523484096  
"Akap10",842.695333646716,0.0396142976412965,0.122331115231652,0.32382  
8468058032,0.746067902150455,0.834819275736022,0.00715196584288729  
"Ccdc88b",1394.49732792347,-1.31397176489194,0.449313340034705,-2.9243  
9962897706,0.00345121359671713,0.0150574541751601,-5.51327062973082  
"Tigd4",33.6464537560356,-0.586073382871371,0.366800576574984,-1.59779  
84231755,0.110087845695118,0.211873735599982,-0.909448027315878  
"Trim16",882.882342860485,-0.62180692900922,0.198600815786299,-3.13093  
844326553,0.0017424868030611,0.00900238677426743,-2.9288757500362  
"Angptl8",207.413547399744,-2.82797815713008,0.72535101485685,-3.89877  
190381843,9.66817943348055e-05,0.000964956312586693,-19.6358619548663  
"Pygo2",2592.62867917927,-0.254540156255194,0.117165045637381,-2.17249  
227250746,0.0298185518773648,0.0782927719505601,-0.648390138119754  
"Cdca4",563.861504482425,-0.715172020843048,0.166715689649279,-4.28977  
034103724,1.78857976098413e-05,0.000264194910452034,-5.89217600184395  
"Fndc11",6.63361376366184,-0.16242734331372,0.640529965880358,-0.25358  
2739240741,0.799817932936701,0.872162120833555,-0.0222168045413895  
"Diras2",22.4321381893686,-2.56046552847117,0.494389414988034,-5.17904  
601281389,2.23023460526477e-07,8.36252198720239e-06,-29.936324131061  
"Bri3",4775.93800268436,0.761458218327755,0.211321677439098,3.60331333  
517454,0.000314186402696957,0.00239544130360738,4.59478189483278  
"Bex4",495.732552827445,1.04238452141471,0.401526452625887,2.596054418  
32727,0.0094301128624603,0.0323313417605505,3.57716991902552  
"Stx19",8.93409331635386,-1.34251761661467,0.708793330369578,-1.894088  
95243788,0.0582132038655463,0.130554525991537,-2.73331796075155  
"Foxi1",1742.01491127047,0.756482374858903,0.517320142199925,1.4623099  
1826827,0.143656301839722,0.25930481144889,1.02106286545952  
"Lonp2",4315.68341277109,-0.0231077851032355,0.365357078697074,-0.0632  
47125758838,0.949569718940364,0.968734515624084,-0.000734011452789938  
"Gimap6",2252.09521289225,-0.683125475933668,0.156069123516794,-4.3770  
6998373808,1.20285361171875e-05,0.00019626142026186,-5.83120210670071  
"Gpr157",297.112591268455,-0.822367713401102,0.171565914792368,-4.7933  
0474468862,1.64056126055784e-06,4.02360546645998e-05,-8.32297563581239  
"A4galt",1735.33676350683,-0.26910674547818,0.237371583512329,-1.13369  
402308513,0.256922917630738,0.397799019134768,-0.248064852636105  
"Usp14",2185.90082839753,-0.2510512400775,0.155844997188031,-1.6109034  
2717001,0.107200772925941,0.207654012278798,-0.394622922035755  
"Cxcr5",46.2593786284113,-2.7729413130418,0.810590907364585,-3.4208887  
4652845,0.000624168598419578,0.00409352147056338,-15.2466009926562  
"Rel11",1387.37058459974,-0.20279488344053,0.146216060893561,-1.386953  
5412266,0.165455929923737,0.288210075577978,-0.252290145576056  
"Klk9",0.648550227941978,-1.47331591592877,3.13282086874131,-0.4702841  
23369208,0.63815203899488,NA,NA  
"Tnrc6b",5181.17027634287,0.495932133638989,0.237483791128745,2.088277  
8200645,0.0367727810153508,0.0919107401919382,1.18375895179351

"Ccr4",27.7874043660484,-2.01500326895584,0.496201936029798,-4.060853299119,4.88936879251474e-05,0.000569491712762559,-15.053618570431  
"Sstr2",3.79640523507252,0.793213595945715,0.878661526542995,0.902752165633715,0.366657443577751,0.511542075905442,0.53171125044685  
"Gm8566",0.785437030416088,1.85041629420926,2.14750498160402,0.861658673698229,0.388875373259062,NA,NA  
"Tshz2",3567.34673763892,-0.419640006038971,0.280347021225266,-1.49685915764298,0.134429909424889,0.246414813760129,-0.587806092351903  
"Ankrd16",3010.03297771976,0.446759771150321,0.184177664256922,2.42570005952028,0.0152788919916918,0.0467676972750109,1.36822974108672  
"Pcdhb16",80.2099406043071,-1.633029816635,0.273388123218511,-5.9733019759961,2.32498959280397e-09,2.83557843472367e-07,-24.619312073132  
"Npm2",40.0554149074982,0.180666713792778,0.356059744164745,0.507405615921538,0.611870246084681,0.731423337512053,0.0565058391559337  
"Trappc9",1681.84516492312,0.158547092648609,0.259623226359498,0.610681466646094,0.541410477900617,0.671827244835883,0.0630627478434581  
"Stpg2",3.03704244905529,0.00939113323236675,1.08415063684753,0.00866220330753491,0.993088648149284,0.995744238486822,4.0051709215454e-05  
"Marcksl1",3455.46206604885,-1.18878383818308,0.196530113011138,-6.04886355566133,1.45871132076568e-09,2.10595000632818e-07,-18.2755650259947  
"Gp5",8.09235118191253,0.014441505042087,0.71821355486249,0.0201075361837914,0.983957588356412,0.989723009277618,0.000149183109860894  
"Kcna3",7.06889179021816,-2.26440764609902,0.722688786771097,-3.1333095068711,0.00172847073590316,0.00895607823774645,-10.6776395436589  
"Stbd1",982.174932083411,-0.80990284193629,0.286554172601497,-2.82635159203422,0.00470815551195176,0.0189591884459671,-3.21164265805357  
"Rpl9-ps7",2.62473265613955,-1.34993656244477,1.11107313820851,-1.21498442903714,0.224372030219512,0.360570827101298,-1.37702556729987  
"Kcna1",23.03548419457,-1.35030959358009,0.65472404521691,-2.06241026802786,0.0391686925554057,0.0963805598624973,-3.15898280342308  
"Synb",7.06380358095966,-0.129320794685739,0.668320651660539,-0.193501120105181,0.846566528916346,0.901940400842908,-0.0133467899911107  
"Palm3",1343.80439791321,0.62933375208215,0.570142971593471,1.10381743428889,0.269672340484722,0.411977692922597,0.5580844075531  
"4933428G20Rik",0.774540349481555,-1.08445508899106,2.11010680255619,-0.513933743864218,0.607298314461362,NA,NA  
"Ino80c",1128.45259040519,-0.211401326407899,0.12585808494143,-1.67968014535004,0.0930195648222455,0.186728660033372,-0.354752297732159  
"C2cd4a",4.51677615222687,-1.74925388456147,0.933148583609299,-1.87457165481148,0.0608516757397761,0.135073539796693,-3.50189416655551  
"Dipk1c",0.734690332037698,-3.28965978178337,2.93874097167994,-1.1194112762864,0.262964722518523,NA,NA  
"Prrg1",471.92303270006,-0.426113515867013,0.197422322720776,-2.15838568807483,0.0308978575254179,0.0804549180062231,-1.07383089226027  
"Gigyf2",3990.40214605794,0.434725397921808,0.164974017004013,2.63511433992199,0.00841089450767968,0.0295754050695651,1.53058647285495  
"Hes5",3.3296354053715,0.152279769497252,1.30376004001157,0.116800457771279,0.907018180986789,0.943127331475567,0.00891658617983103

"Catsper4",54.389336042891,0.00637670081103932,0.370246085486222,0.0172228716548486,0.986258815952337,0.991182975731778,5.64728545381041e-05  
"Tmem196",5.78911755931481,-1.12478809440193,0.729435005889175,-1.54199906135684,0.123073821690311,0.230888585910809,-1.64873688103212  
"Timm8a1",1081.49650757927,0.974617089024067,0.208990235552232,4.66345753641913,3.1094037003477e-06,6.82738213393912e-05,9.34851167431425  
"Zfp473",60.6612160744118,0.0576471680395214,0.317833099299487,0.181375596709648,0.856072772193797,0.908458449473496,0.00553448136475315  
"Krt35",0.41033388454827,-2.66917809970653,4.73531307650841,-0.563675105865366,0.572975262336283,NA,NA  
"Neurod4",0.347557051178682,-2.43206479204848,4.73954195221595,-0.513143425370753,0.607850996969186,NA,NA  
"Tmem229a",7142.33384524177,1.70936149040585,0.481468550415681,3.55030767623359,0.000384781165539356,0.0028078080709904,10.0430989914843  
"Rgmb",1517.10223169251,-0.455496678159167,0.105622937956756,-4.31247877563922,1.61434383639298e-05,0.000243553280906977,-3.78981199522802  
"Eno4",26.5365159609706,0.713766736773753,0.531593380603612,1.34269304851631,0.179371386554348,0.306707295890264,0.843573368918054  
"Fcr15",8.23291259353714,-3.58013647519838,1.80366192451487,-1.98492656885316,0.0471526418929871,0.11127840857292,-7.86097737794644  
"Ccdc187",14.2725043707149,-0.838897579722791,0.487598188109684,-1.72046902588999,0.0853472192734256,0.174782069256722,-1.46321807727751  
"Isg20l2",1184.75295382422,-0.181132580917477,0.0955300286101337,-1.8960800447019,0.0579494608796752,0.130210474882058,-0.369257441005709  
"Arxes2",1235.80515738706,-2.91217736056024,0.954538647124908,-3.05087423053198,0.00228176131506241,0.0110588571019356,-13.1179717190855  
"Zbtb33",1083.09981480178,-0.144161289903234,0.112600057075785,-1.28029499848483,0.200441406044721,0.331991720613317,-0.158958761298913  
"Ldlrad3",1183.74980798528,0.53095404610813,0.158488236389826,3.35011643893979,0.000807775963838201,0.00499208105956173,2.81400462864943  
"Cyb5r2",3.59929842808308,-2.60294470837906,1.4872744899781,-1.75014412330664,0.0800934477186973,0.166470743376949,-4.66691249396367  
"Pirt",9.34246710931682,-1.46120699490785,0.990698108603259,-1.47492660197761,0.140232277505998,0.254656696173229,-1.99869581301125  
"Arf1",13256.9897700835,-0.125782541842457,0.162990021063028,-0.771719280862093,0.440280708585835,0.582085249254585,-0.0680657591129955  
"H1f7",0.176189212199078,1.34515345467051,4.78471990596623,0.281135255794846,0.778606660958885,NA,NA  
"Tenm4",613.244793173416,-1.57769628647682,0.56651329780505,-2.78492365949677,0.00535403267749465,0.0209540203022462,-6.09846627555419  
"Olfr731",580.134021984285,0.699925745175456,0.333620315750302,2.09797099316732,0.0359077078338215,0.0902343713550525,1.68356279868113  
"Gm4737",5.36648294369293,0.597937912450425,1.45223191925991,0.41173720569036,0.680532051526127,0.785055847867496,0.144701225917076  
"Lmod1",554.813991534979,-0.781053667491084,0.267983925860182,-2.9145541658293,0.00356196990750649,0.0154096492692615,-3.25915058711005  
"Taf13",1757.61077689475,-0.0722844457500065,0.174200898533762,-0.414948753757416,0.678179418432316,0.783299184068916,-0.0176547932395029  
"4632415L05Rik",1105.10092847132,0.171208106875253,0.126709228754858,1.35118892726027,0.176634920638797,0.303011409696926,0.204419880398846

"Tmem72",3819.3516068678,1.25987009271683,0.329519527862543,3.82335487  
334875,0.000131648091294744,0.00123052468075979,8.44152601517499  
"Rbm15",831.41754773764,0.167481893330658,0.120276993588976,1.39246823  
796574,0.163780653280222,0.286278404774158,0.209484760829457  
"Arid4a",3713.85246055941,0.500585937848897,0.344844574920425,1.451627  
70202898,0.146605151809863,0.26333553661803,0.667944959915904  
"Entpd1",1061.36355345443,-1.46273771650957,0.31528236671836,-4.639452  
98220953,3.49332598594178e-06,7.49316502463067e-05,-13.894449306342  
"Col6a3",4047.08964772322,-1.45127614283818,0.268324310924657,-5.40866  
438019359,6.34964921880852e-08,3.23251855008691e-06,-18.3473943476656  
"Dmrt2",685.562010981583,-0.0380836514539623,0.377951386011633,-0.1007  
63359689836,0.919738313488305,0.950800998695454,-0.00192133899576932  
"Nat8l",1796.55682196321,-4.00836009407192,1.21935598579908,-3.2872763  
4977339,0.00101161507725019,0.00592326449736462,-20.5583480019936  
"Nwd1",14.0438861884261,0.354778998356216,0.421086841806432,0.84253166  
5996116,0.399490422505281,0.543753176824292,0.216152600797834  
"Olfr49",2.71971322717938,2.36703841839478,1.4745265044935,1.605287128  
56732,0.108430630483378,0.209469972571576,3.70009499304127  
"Kmt2d",8975.24273217456,-0.381291581091484,0.227200924671164,-1.67821  
315711343,0.0933054941404273,0.187052285086372,-0.639184662741101  
"Selplg",1075.77320344552,-1.20146367512991,0.377538027154048,-3.18236  
465922856,0.00146077769849394,0.00787890555054906,-5.81936893663491  
"Mcmbp",1989.85716135212,-0.0879199778956477,0.189349478318692,-0.4643  
26486010543,0.642413850703856,0.755782611106775,-0.0246177253038575  
"Tmem81",350.199969245759,-0.0159000124375036,0.136400414627903,-0.116  
568651795367,0.907201880568193,0.943127331475567,-0.000931008968738583  
"Asb8",1509.40241905169,-0.0818254165848573,0.166860509797351,-0.49038  
2156234767,0.623863500952394,0.741421506965575,-0.0244810174580609  
"Gm7075",1.13637561216309,-0.542696917440409,2.07511208126046,-0.26152  
6556729777,0.793686472621807,NA,NA  
"Bend7",554.767046022699,0.692821861540287,0.166049527574746,4.1723808  
0504877,3.01433297234413e-05,0.000392346223596568,5.43405535285854  
"Muc6",3.65131289898863,0.992040824345699,0.968320754955693,1.02449608  
69305,0.305601018144473,0.450139374674274,0.791845024403814  
"Cracr2b",966.861312158721,-0.483939708283522,0.150279649664377,-3.220  
26108900517,0.00128073895177088,0.00710234587077036,-2.39420950723706  
"Gpr85",77.799885638544,-0.142753264241285,0.354044409194226,-0.403207  
226365131,0.686795784025551,0.789805024885296,-0.0336853689815707  
"Nags",3.03272511354678,-0.796324579222674,1.10897238830622,-0.7180743  
07006809,0.47271147118946,0.610478294069122,-0.392996166086117  
"Amigo2",459.472467277984,-0.617020237449378,0.188048629247039,-3.2811  
7381083805,0.00103376018993626,0.00603119574607334,-3.15347319259329  
"Mfap1b",2440.3537226703,-0.164392613937732,0.124257042327676,-1.32300  
440166776,0.185833914047456,0.314393896407574,-0.190220112637125  
"Fbxo43",9.4361772853359,0.897437760956963,0.557955559253364,1.6084395  
0037505,0.107738956411665,0.208402199614548,1.40743855082832  
"Fbxo10",791.756485420594,0.523489760154319,0.135610131207265,3.860255  
53912505,0.000113268509267365,0.00109494764189147,3.56865520592684  
"Rnf149",3759.16465893665,0.485757105076918,0.168237053156202,2.887337  
2183113,0.00388517584004151,0.0164394875280229,1.9955237350624

"Ovch2",0.0810182756847091,0,4.78471990596022,0,1,NA,NA  
"Gng7",114.453166103902,-1.76831871870843,0.409569736990203,-4.3175033  
6756628,1.57804001840078e-05,0.000240567820787947,-14.7345307703583  
"Crebrf",2714.40973110637,0.293144169230179,0.142626893461968,2.055321  
84088652,0.0398479291185726,0.0976209155780501,0.682047841590014  
"Bcl11b",738.001494020283,0.724893517315027,0.332876069355663,2.177667  
85914704,0.0294307734406337,0.0775146860118164,1.85376139426716  
"Dip2c",848.091608405576,0.0115410021786914,0.161089063025299,0.071643  
6110679895,0.942885532612582,0.964603710314293,0.000415913769497768  
"Rbm33",2703.76191016366,-0.224041597442709,0.176359327562738,-1.27036  
999141998,0.203952867327383,0.336322142011951,-0.24413495234861  
"Syngr2",4404.09519011012,0.0104023061597951,0.208168911815591,0.04997  
05074550712,0.960145890590656,0.975827376348808,0.000254540028508836  
"Sacs",282.567558376542,-0.929514346988744,0.197643027585708,-4.702995  
89286375,2.5637157863201e-06,5.81782255149808e-05,-9.06462335903043  
"Zfp738",1202.04099504666,-0.00906363104324858,0.149771457167574,-0.06  
05164109013616,0.95174434579491,0.97005286222212,-0.000275577090034389  
"Dleu7",701.473856793505,1.64090175959185,0.809193697731913,2.02782320  
746087,0.0425782948854017,0.102822837958331,3.73263765371156  
"Tas2r126",0.477522058722585,-0.0912668335024808,3.1568899422976,-0.02  
89103627844739,0.976936080770642,NA,NA  
"Frm6",1011.86211430501,-1.39242035520867,0.196620359461869,-7.081770  
97742876,1.42323734916487e-12,9.56906270138506e-10,-28.9168330628031  
"Slitrk3",1.3711463966441,-3.4999225983523,2.30542073630384,-1.5181274  
9110756,0.128982262035063,0.238774052558455,-5.01272060593631  
"Ankrd46",2975.76411885408,-0.492300421441085,0.238640102895556,-2.062  
94086981913,0.039118246464875,0.0963170272018828,-1.15203721880661  
"Pskh1",1364.76761627191,-0.0344726225062643,0.113773576775322,-0.3029  
93221126733,0.76189502768755,0.845692203680511,-0.00577760501717907  
"Gm9823",0.287192621222655,1.47558876133794,4.7324125635603,0.31180475  
9521605,0.755188906682535,NA,NA  
"Ckap2l",126.129166573205,-0.85466752104642,0.44107133062744,-1.937708  
17031029,0.0526588365775627,0.120949699091685,-1.8053830309133  
"Mfsd6l",119.504547392977,0.764297621761914,0.265545955001264,2.878212  
25429051,0.00399935949436715,0.0167796341480517,3.12413484266677  
"Ric3",157.738534199223,-0.746530426828901,0.466377839278481,-1.600698  
75529214,0.109443656991901,0.211063092693518,-1.16130136783855  
"Lhfp",2725.83261663469,-1.47396503675322,0.425616608382278,-3.4631285  
7093525,0.000533933197915498,0.00364517839389229,-8.27535556376219  
"Gm8258",0.151078246467733,-0.0675065776026396,4.78471990596623,-0.014  
1087835713149,0.988743192877139,NA,NA  
"Npy4r",2.3651999748813,-1.79681528409502,1.56380560270147,-1.14900169  
240411,0.250555282804731,0.390295350653244,-1.69053638599861  
"Pcdhb18",87.9547420589449,-0.708235092905476,0.370889715843351,-1.909  
55710727932,0.0561902622416485,0.127145139428719,-1.46068248028004  
"Pou4f1",10.5776512108468,0.286200755236098,0.653426803985643,0.437999  
717015566,0.661386488566015,0.770031274500517,0.0747911687264642  
"Coa7",867.776975847591,0.905233527131134,0.291688955494436,3.10342064  
750683,0.0019129752749463,0.0096480061849206,4.20119241848514  
"Arxes1",320.461884923824,-3.07426411941486,1.04790477231965,-2.933724



70535622,0.00334921123627899,0.0146973743709345,-12.9736602476113  
"Omd",103.652287915497,-0.284685939481445,0.339736914852512,-0.8379599  
83256557,0.402053178448902,0.545945600208698,-0.172302162619092  
"Pdp2",2485.34136479507,0.830479724439155,0.312680769774849,2.65599872  
047506,0.00790739144125003,0.0282452449308553,2.96218012556524  
"Fgfbp1",238.193775246414,-0.930025575860456,0.533139616871291,-1.7444  
3156432132,0.0810838650440985,0.167974203211839,-1.65911434914704  
"F2r",2921.20327525988,-1.08850246642033,0.391314733243488,-2.78165469  
875889,0.00540825483962347,0.0210942494224802,-4.20026413329147  
"Olfr1394",0.286703655845716,1.91201515486892,4.7586561100617,0.401797  
295422579,0.68783321274769,NA,NA  
"Socs4",2210.15136722976,0.25201821996957,0.0799306725836813,3.1529600  
8182249,0.00161623906652993,0.00852459433497079,1.20081637476407  
"Scrt1",3.42486812487544,-1.76471821638322,1.34208755771606,-1.3149054  
2940908,0.188541687806618,0.317679383758507,-2.02362467061074  
"Osr1",119.632765393247,-1.13740465192586,0.431988260148738,-2.6329526  
9073804,0.00846461369502769,0.0297267719426603,-3.9987817547886  
"Fam171b",87.6217411850371,-0.466942795368268,0.285913523310557,-1.633  
16092908652,0.102435154874241,0.200972050255365,-0.74925147575266  
"Olfr843",1.76487250264877,1.31475170491163,1.30096577644751,1.0105966  
8802493,0.312209501641266,0.457339176140321,1.02856967977971  
"Tprg",3.64912880297602,-3.43613156317147,1.31688474211115,-2.60928800  
622512,0.00907308441137446,0.0313553704099573,-11.8971578838669  
"Gli2",53.8806737739666,-1.77963897531808,0.552500379293598,-3.2210638  
0740126,0.00127715710129706,0.00708449762762167,-8.80893942370405  
"B330016D10Rik",303.07310795409,0.275939887407702,0.17158708339768,1.6  
0816235082315,0.107799626450244,0.208498870799211,0.432624530566724  
"Zfp407",365.892705748455,-0.337593792884296,0.211489860865394,-1.5962  
6466962955,0.110429714559892,0.212384945205048,-0.523052587618883  
"Mlf1",38.5132532667555,-0.320830035789362,0.420413011155168,-0.763130  
605562891,0.445385509088379,0.586502540139127,-0.171187938631925  
"Ranbp3l",1121.35508153215,1.86154025323079,0.688123119019088,2.705243  
00343868,0.00682544391781485,0.02529604742626,6.84508292614338  
"Timm29",1829.90802041841,-0.167881378843098,0.272359835415123,-0.6163  
95507021871,0.537633517982732,0.66903400732284,-0.0674749487676963  
"Nupl2",338.896610958683,0.0418556418614228,0.176806288531643,0.236731  
63556019,0.812864990817095,0.880807024060893,0.00531218073534125  
"Cyp4f16",1015.79519082124,-0.504059213643789,0.129673247714223,-3.887  
1488339264,0.000101428568640124,0.00100235896165491,-3.48073003787817  
"Smim5",811.85306526798,1.24625966637695,0.342083756165339,3.643141902  
86954,0.000269330258150846,0.00212865884613912,7.66731741738413  
"Ccdc57",361.108871544619,0.242989725865668,0.259467758818739,0.936492  
946067404,0.349019442748037,0.49398817470247,0.171366973314475  
"Msx1",86.2362950042658,-0.754225106373832,0.304589841612268,-2.476199  
14827604,0.0132789486110358,0.0421270647604906,-2.38867984331446  
"Inka2",168.636133092822,-1.59095890451907,0.479220010370233,-3.319892  
47128878,0.000900521264564421,0.00543594278428342,-8.29640889063857  
"Sult6b2",2.28415407874962,2.07361459376664,1.19488988659949,1.7354022  
4670233,0.0826695824254225,0.170470667828793,3.66862241932962  
"Spata33",173.022295215767,0.726613607361092,0.243912344049342,2.97899

481140693,0.0028919567531604,0.0131500402922392,3.14720364753561  
"Cxcrl",0.555157322704039,-1.76238266959213,2.55316216097384,-0.690274  
474739949,0.490021596599984,NA,NA  
"Mypop",430.426805349974,0.108933793564596,0.138602141471318,0.7859459  
63087005,0.431899145403537,0.573966728806319,0.0604782826987342  
"Bdnf",159.485933432,1.57913167636826,0.42770346880127,3.6921180012734  
4,0.000222394229821227,0.00184032018618171,9.94508027686  
"Zdhhc22",0.964642461825953,-0.0206150348519833,2.35910927032035,-0.00  
873848240577004,0.993027788537962,NA,NA  
"Zbtb8b",87.6421718604864,-0.227445081404863,0.39128192431754,-0.58128  
1851446535,0.56105051009689,0.689310828347143,-0.0846238947784591  
"Fitm2",1663.74899517058,-0.928375921298137,0.609718408539213,-1.52263  
06247213,0.127851143464365,0.237255315053602,-1.33557871869209  
"Depp1",1421.25922433274,-1.88955694771037,0.603491774165625,-3.131040  
10460264,0.00174188371448512,0.00900238677426743,-8.90031497603218  
"Nrip1",2078.050125079,-0.6282474523344,0.261194878382023,-2.405282432  
12919,0.0161599712060852,0.048903789938887,-1.89598822616551  
"Tyw5",517.493144900103,0.133813133221623,0.168989754072353,0.79184169  
4522684,0.428452987472063,0.571182804579699,0.0749415063199506  
"Mmgt2",703.376855850649,-0.874147656564224,0.237978220018445,-3.67322  
545944108,0.000239507983252069,0.00194580277393701,-5.45650017212647  
"Cd300e",6.5337945114373,-1.26429240390683,0.714081263538906,-1.770516  
14215606,0.0766411977437989,0.160803838761282,-2.31058293135317  
"Defb15",0.366299305630371,-0.551305484500155,3.86278939216063,-0.1427  
22118275205,0.88650964768746,NA,NA  
"Duxbl1",9.97004144199268,-1.98958051177692,0.889069965150086,-2.23782  
220721072,0.0252326516384401,0.0689829278808615,-5.3199318237834  
"Tmem136",885.961148239356,-0.0863432300335052,0.260388230464107,-0.33  
1594211764526,0.740195690867765,0.83068582828017,-0.0160169817558071  
"Fbxl13",21.1339330925515,0.177699138732639,0.493534184671798,0.360054  
367562825,0.718806476745256,0.813754205630784,0.0366232446930587  
"Cxcrl",272.314501627866,-1.40722656802939,0.486537983801278,-2.892326  
22093522,0.00382400663477001,0.0162299698225393,-5.79903399307714  
"Nkx1-2",0.0820881951088163,-0.0627941126595849,4.78471990596623,-0.01  
31238847610044,0.989528955554716,NA,NA  
"Jam1",499.385305355938,-0.951574973629889,0.413100513610343,-2.303495  
01459943,0.0212510073371603,0.060295713192659,-2.67249286006658  
"Phldb1",4290.14882121523,-0.463987854375154,0.209084988840347,-2.2191  
3518014172,0.0264775292894246,0.071662807618712,-1.22297147886686  
"Gm9826",1.35779381165931,0.51626925049476,1.74355266687836,0.29610189  
6032246,0.767152266057535,0.849689552578381,0.0840921185506823  
"Tob2",3274.92154507302,0.0422653330588416,0.268544136936799,0.1573869  
14273941,0.874939925827922,0.92194004938353,0.0034351183213653  
"Thnsl1",348.546963274831,0.245889255379079,0.161142269881775,1.525914  
06065882,0.127031268497246,0.23613228479095,0.35490747844624  
"Sp8",0.321361678232658,0,4.78471990595347,0,1,NA,NA  
"Tmem252",3101.40322510564,2.08780986377246,0.552982680621441,3.775542  
95448491,0.000159659506957242,0.00142895347383657,13.6768518700048  
"Ccnb1-  
ps",0.185885547873138,0.406508005289677,4.78471990596623,0.08495962423

68938,0.932293489796378,NA,NA  
"Mlec",21409.908996875,0.684543655866152,0.26528139712419,2.5804434961  
7808,0.00986735025008845,0.0334074657364515,2.32674737436636  
"E130311K13Rik",419.517324301954,0.350731512785853,0.139515466174062,2  
.51392567723118,0.0119395592662015,0.0388491801177002,1.13919991065923  
"Gja3",58.042020242747,-0.0603840669321068,0.692624980482868,-0.087181  
4742950935,0.930527264652945,0.956679177759194,-0.00267424011291097  
"Igf2",205.025489465391,-1.41999066109596,0.381882781240017,-3.7183940  
4878399,0.000200493351347449,0.00169670979365128,-9.05821175916379  
"Gm5946",0.948585271688899,0.453151905612155,1.47137698999903,0.307978  
110771227,0.758098988408404,NA,NA  
"Gm5763",0.481277464418446,-2.13832142043315,3.78024677278104,-0.56565  
6569256202,0.571627264456176,NA,NA  
"Morc2b",0.674714426678182,-2.80416558230773,2.5533220597387,-1.098242  
0222362,0.272098821137283,NA,NA  
"Myof",5010.19676621011,-1.10540367009396,0.18310848904124,-6.03687833  
306843,1.57124098423269e-09,2.18828976504064e-07,-16.9513380232051  
"Nog",48.0267622595168,-0.289958972390424,0.530509851099846,-0.5465666  
12833456,0.584676511875026,0.708648140022333,-0.0998607543436652  
"Rtbdn",0.270802945932136,-1.62943893969085,4.76019598996016,-0.342305  
010786854,0.732121365040968,NA,NA  
"Olfr1336",596.851321942023,0.590344132065355,0.226286767802281,2.6088  
3187204817,0.0090851867514504,0.0313805086412365,2.04351654706039  
"Gm6377",69.8254722736041,-0.576371245780348,0.453616842030264,-1.2706  
1253546202,0.203866525173687,0.336236635750003,-0.628210129710979  
"A730049H05Rik",483.210711640097,0.548067741217085,0.504572503977938,1  
.08620215508423,0.277389564049889,0.420930945586796,0.474235608510798  
"Ctxn1",521.276922341824,-0.455076292170891,0.283970781054836,-1.60254  
618619729,0.109034882821248,0.210407971620022,-0.709330561597361  
"Exd1",135.676113776863,-1.79010930770352,0.565489319898888,-3.1655934  
8640501,0.00154766919731855,0.0082426806908815,-8.58971359924117  
"Samd13",31.0542127919328,-1.00932597028509,0.582177604145872,-1.73370  
8000956,0.082969906182245,0.170900827249251,-1.78314777748766  
"Ccdc169",10.2957526772657,0.599884319169578,0.685051584174613,0.87567  
7588414529,0.381205332375689,0.526137295297032,0.385241560148099  
"Lemd3",1027.04478528537,-0.133880172914563,0.133220260812633,-1.00495  
354158522,0.314919221120649,0.460188486353176,-0.103906962052579  
"Rhno1",1223.95246238272,0.0119651177400466,0.196322891562939,0.060946  
1160886107,0.951402122354246,0.969930765084564,0.000365302058957567  
"Tpcn2",1010.68860707598,-0.54516369384285,0.166053426848539,-3.283061  
98907961,0.00102686082827627,0.00599812235761854,-2.78922580377278  
"Mex3d",537.402577436645,-0.547818183632783,0.218815867594684,-2.50355  
785279482,0.012295157743122,0.0396885763178965,-1.76764048641975  
"Vmn1r26",162.3006330659,0.426357677131688,0.403921166336491,1.0555467  
5680577,0.291175337023604,0.434811727141475,0.35508864566481  
"Krt90",0.67111442609704,-1.84776178078064,2.54872950829705,-0.7249736  
68161133,0.468468184696873,NA,NA  
"Ccdc6",4598.87731000847,0.90065709234072,0.214524238394536,4.19839314  
699862,2.68815642773184e-05,0.000358016899097784,7.1466513136138  
"Speer4b",2.27307817508361,0.0338272616279803,1.25394257027989,0.02697

67232006724,0.978478299468738,0.986370069436534,0.000464234203452303  
"Lurap1l",846.243339726426,0.0408084304875535,0.232369570286862,0.1756  
18651087469,0.860593548638692,0.911681431725247,0.003773337537886  
"Tprn",1732.73331232,0.75991069229424,0.19589751504178,3.8791236945102  
1,0.000104833439880207,0.00102767340914242,5.2285334940311  
"Gm8666",0.22397603279477,-0.927481920711741,4.78269286764269,-0.19392  
4624971555,0.846234901762738,NA,NA  
"Tbc1d12",658.863784187001,0.220109035999667,0.209532471523715,1.05047  
697093935,0.29349887346318,0.437477336196398,0.181970826424475  
"Fndc9",1.57879387113114,-0.813011117843657,1.36351318570127,-0.596262  
013722674,0.551000203361193,0.68095341098666,-0.312408780456468  
"Zfp454",115.840394580724,0.060202221936704,0.184101733494981,0.32700  
5189200522,0.743663960383911,0.833043772237475,0.0109970851737045  
"Ggnbp1",1657.02245473644,1.05496879349025,0.272094438503459,3.8772155  
7005231,0.000105658736026667,0.0010342038328554,7.25198566105848  
"Klhl11",47.8911942150091,-1.22473857559254,0.421419901407782,-2.90621  
912135906,0.00365825169656624,0.0157215321974099,-5.08600131174161  
"E130114P18Rik",2.73202140740691,-0.35951734319544,1.05540973289808,-0  
.340642436760774,0.733372778166394,0.825547164060294,-0.06892266839915  
19  
"Prss50",1.27553483921765,-1.05902587466892,2.03614426546004,-0.520113  
379308929,0.602984553743038,NA,NA  
"Mcat",1262.1286477715,-0.0675103220005346,0.26381984296057,-0.2558955  
43121161,0.798031496150966,0.871026540077896,-0.00932201643628913  
"Foxo3",3317.4906951713,0.425609065105734,0.2030900632952,2.0956666131  
2767,0.0361117755351918,0.0906187129195842,1.02192760363172  
"Rpl29",14188.2616911198,0.106018405673035,0.171014873878955,0.6199367  
53267875,0.535299427373929,0.667088599957616,0.0429196864999968  
"Hoxb3",2044.3060902755,-0.117876955048675,0.228849215208453,-0.515085  
686185569,0.606493144606488,0.726956619753937,-0.0375896022496544  
"Tmprss11f",6.95267128637255,-1.2498052315,1.05811157879949,-1.1811658  
2082771,0.237536856269545,0.375680409049263,-1.22357990962936  
"Tmem53",660.287243732066,0.623284783883772,0.329529471698791,1.891438  
66456197,0.058565811362374,0.131162253908343,1.26609093616318  
"Pthlh",22.1139213054858,-1.01424633116737,0.51920421192633,-1.9534632  
1903737,0.0507647314964104,0.117792542510652,-2.16930080112416  
"P2ry6",751.320618041296,-1.12188537559169,0.388905728331112,-2.884723  
19604541,0.0039175794867041,0.0165442852137224,-4.60165355850866  
"Insc",96.0577592450822,0.60621915391361,0.470461927875153,1.288561556  
19564,0.197550555740186,0.328599277923746,0.674671160069362  
"Dcun1d3",1035.80966772173,-0.0439740879745905,0.337230066119787,-0.13  
0397886761883,0.896251638436218,0.936150128367139,-0.00290138489925505  
"Cfap100",24.8277706940048,0.691021565630708,0.642508804124891,1.07550  
520894713,0.282148601357541,0.426063617508468,0.589556524504735  
"Cyb561d1",766.655050147175,-0.0485728719269265,0.127685831758596,-0.3  
80409253383405,0.703641646819444,0.803255552089317,-0.0106414598498423  
"Cep120",1357.94878174728,-0.503116283379872,0.11684002285875,-4.30602  
691671927,1.66212840874769e-05,0.000248719721517747,-4.17545456482912  
"Ifnb1",0.649044425420644,-1.20603153177195,2.44850371266669,-0.492558  
588142164,0.622324514994803,NA,NA

"Slc35e4",538.687141989802,-0.208168626901918,0.242543635669574,-0.858  
272889029807,0.390741796021209,0.535095065235394,-0.130170102247642  
"Lonrf2",61.9617212993553,-1.81904470393107,0.442657817325696,-4.10936  
988511979,3.9674017623011e-05,0.00048468922030919,-13.8829540104814  
"Dact2",682.91118793779,0.458498021904354,0.232500921257915,1.97202668  
88566,0.0486065598873307,0.113951028577994,0.995851512366593  
"Pkd1l3",3.60417388542296,-2.58004800113493,1.17502751006641,-2.195734  
12454753,0.0281109791681963,0.0747963798883041,-6.69002781062213  
"Vps37c",1606.30781765614,-0.321087149669991,0.160367228510841,-2.0021  
9928130943,0.0452633029663226,0.107622882828092,-0.715742425450138  
"Slc39a9",2361.4376405986,-0.0243897361734533,0.158312641278279,-0.154  
060572652448,0.877561975536121,0.923643478186321,-0.00193725547438115  
"Vstm2a",129.531037914648,2.06037952027733,0.608869176594657,3.3839445  
3107451,0.000714524368933105,0.00454100265497317,11.1149386938434  
"Gm12185",152.041454059998,-0.943342461537652,0.516704022361789,-1.825  
69211910864,0.0678966509520701,0.146609363836097,-1.81120207250384  
"Slc25a47",172.22475192068,-0.283745182779692,0.237713997046422,-1.193  
64104051593,0.232618412843102,0.369860051668824,-0.28222163674954  
"Arhgap30",1694.13882411742,-1.21841389430628,0.383163252926851,-3.179  
88190412112,0.00147335083451335,0.00793355276756181,-5.89304683467841  
"Phf3",3690.17792832069,0.0599891544183716,0.201685359509375,0.2974393  
1123361,0.766131134910293,0.848799640234155,0.00983414899294556  
"Hexim1",5456.45956327886,-0.0268954226993274,0.200332540242399,-0.134  
253889392029,0.893201813999642,0.93382853574598,-0.00184132621382458  
"Cdk5r1",147.683282974927,-0.133584822139326,0.307330289061066,-0.4346  
62078207278,0.663807727968422,0.77206651634027,-0.0345563324882403  
"Zfp710",1768.26199849172,-0.209838886210552,0.213465380267627,-0.9830  
11324587958,0.325601865091416,0.470521009570549,-0.158200614072209  
"Rimkla",67.4255620348112,0.834160069306763,0.308423910190909,2.704589  
50082837,0.00683888437460177,0.025330010349291,3.06617672614988  
"Neurog1",0.153961243433233,-0.533217009430887,4.78471990596623,-0.111  
441635019429,0.911266145690107,NA,NA  
"4930539E08Rik",78.8660146393106,-0.506591069474524,0.436323607588982,  
-1.16104437317482,0.245623854646335,0.384734408571195,-0.4838968182539  
49  
"Rnf24",2607.04984101948,1.86411568959948,0.357291027531981,5.21735936  
800881,1.81491924100077e-07,7.14902544758491e-06,22.0870390818069  
"Efna5",840.269598157911,-0.269354692507778,0.321704413010497,-0.83727  
3850200462,0.402438654535978,0.546278814128551,-0.162858792397384  
"Gm5540",0.711852122387559,-2.6010799280979,2.21309260308699,-1.175314  
54602023,0.239868897129158,NA,NA  
"Fkrp",1077.63552707683,0.00449535344543322,0.11642190041264,0.0386126  
100802349,0.969199248400994,0.981062046421496,8.594923962293e-05  
"Zfp689",187.877965461945,-0.223375704362251,0.173672357985091,-1.2861  
9031234336,0.198376651196949,0.329495523046095,-0.247990034400514  
"Cdca2",196.941849733822,-1.21457322278006,0.383107727262937,-3.170317  
73662572,0.0015227232889419,0.00814542076482557,-5.84246081926908  
"Ccadc125",421.614339904989,0.0606592820317665,0.233370731083988,0.2599  
26691535005,0.794920321846876,0.868554837945466,0.00854838228504837  
"Tada3",1423.08047747955,0.261045433553577,0.169896988322646,1.5364924

130252,0.12441765714824,0.232766789395162,0.380530687489912  
"Nr1h5",7.31305875682481,-0.643780420072481,0.606857696244072,-1.06084  
247436743,0.288761495789282,0.432692534200459,-0.539312810281918  
"Atp13a5",0.0837058623428614,-0.544048378937456,4.78471990596623,-0.11  
3705376621746,0.90947135024012,NA,NA  
"Gm6206",5.02059535350929,0.484282410176456,1.67360679225296,0.2893645  
10480104,0.772302450372425,0.852708646855278,0.0771642772091976  
"Prex2",1062.95918871356,-0.42281245738394,0.228166776473672,-1.853085  
11571459,0.0638701598621179,0.139878734919867,-0.831663398332104  
"Mrgpre",120.157067905521,-0.784972166801626,0.326899439310334,-2.4012  
649530929,0.0163385017172936,0.0492910577879917,-2.36277611114927  
"Yjefn3",81.8467404293473,-0.328496969501514,0.396675777769698,-0.8281  
24599259581,0.407599939590436,0.551403845287887,-0.195550240493789  
"C1galt1c1",1337.07158431375,0.487411345784251,0.183093941239779,2.662  
08342277116,0.00776586290283107,0.0278343372940074,1.74565635844327  
"Nrsn1",3.04865179197056,0.477402745668594,1.44787079701518,0.32972744  
9889016,0.741605910610303,0.831837545019829,0.0878984939223864  
"Gphb5",0.128665072532121,-0.550785773111473,4.78471990596623,-0.11511  
3482907261,0.908355173133819,NA,NA  
"Elfn1",145.131009290568,0.209557286374718,0.356507787908408,0.5878056  
34216768,0.556662761824445,0.686081575856702,0.0789525398184448  
"Prss32",6.65689443350293,-1.13492768195058,1.3708410410464,-0.8279061  
16003252,0.407723671018263,0.551468922034843,-0.675474674196032  
"H2al3",0.425182998559969,1.53899067283787,3.71858951670983,0.41386409  
1726789,0.678973642791909,NA,NA  
"Atxn7l2",2032.13956850345,1.79342501175485,0.416858902949165,4.302235  
11856613,1.69083747746876e-05,0.000252048540792705,14.860120338356  
"Ndnf",25.4812054917775,-1.65766270643131,0.531979040865986,-3.1160301  
0474412,0.00183303558175308,0.00933660600131178,-7.74760463821622  
"BB014433",24.8674264008339,0.00991820326732753,0.599398846472875,0.01  
65469175085848,0.986798072442786,0.991374114617139,8.59244067138486e-0  
5  
"Olfr982",6.22284035216288,-0.206617271414947,0.645881956323898,-0.319  
899432693445,0.749044567938178,0.836582999401546,-0.0368666249508515  
"Olfr729",13.7851616940089,0.899986193784983,0.603244191056481,1.49191  
025314112,0.135722674406636,0.248131336669535,1.25439813762451  
"Olfr873",0.896056939259796,-0.261524706172965,1.68951269219293,-0.154  
79298106575,0.876984524812974,NA,NA  
"Tmem121",17.1695773304977,-2.37006134107944,0.64058296331613,-3.69985  
072473712,0.000215726320355921,0.00179676710563851,-14.9829738707412  
"Clec4a1",455.02496044798,-1.35007589152783,0.433160551916547,-3.11680  
250095336,0.00182824006620518,0.00931704778119934,-6.31283263579952  
"Mterf2",253.519215834186,-0.0981887615903984,0.212494892636753,-0.462  
075866257388,0.644026916260395,0.757096549962594,-0.0273224457456825  
"Olfr398",36.5322452699923,0.311675674470014,0.311654277668695,1.00006  
865556757,0.317277283728609,0.462407628627794,0.2403980856988  
"Rapgef4",1005.11930288462,0.143167740693246,0.305577303447902,0.46851  
5622979358,0.639415901327072,0.753404111921396,0.0405384505751991  
"Armxc3",1511.42735431137,-0.741152840790288,0.148925976748451,-4.9766  
5254223688,6.46932970349371e-07,1.9358130187683e-05,-8.04328565303449

"Olfr985",0.466085072788222,0.889826436642075,2.27249800881874,0.39156  
3131491856,0.695381033674297,NA,NA  
"Acap2",2074.06524618896,-0.606808683377724,0.125715609624856,-4.82683  
642221107,1.38718968354572e-06,3.54487869590752e-05,-6.21822436295455  
"Bmyc",766.763692166717,-0.949864092791959,0.252062222403245,-3.768371  
49072019,0.000164316041039819,0.00145761336132593,-6.20351951775554  
"Zadh2",3220.59113715165,-0.426564393047771,0.350415659955176,-1.21730  
97318263,0.223486392975089,0.359578943905235,-0.436299246126603  
"Seph2",10006.5446427782,1.09516458221928,0.405681263902527,2.6995690  
4512705,0.00694293473868272,0.0256001024082518,4.01395224525486  
"Gpr137c",130.881827561332,0.251137292233647,0.258854099642698,0.97018  
8583376881,0.331952500340009,0.476753819359862,0.186031210757823  
"Il23r",6.32777145700154,-0.586531129495607,0.86854247319747,-0.675305  
062901921,0.499481967953908,0.634828199671814,-0.266520254582383  
"Ankrd34a",14.5371605258851,-2.14829596085564,0.498557688712945,-4.309  
02182333521,1.63978188828552e-05,0.000246131387665828,-17.851576936604  
8  
"Olfr147",28.6794399216046,-0.369083959325877,0.393124679668046,-0.938  
847084435224,0.34780926060744,0.492632933555417,-0.261308098911617  
"Pcdh10",7.57936779273988,-2.60076348358325,1.30131528211156,-1.998565  
23575376,0.0456554149586469,0.108361446240255,-5.77963225612004  
"Ccr2",2750.08908570068,-1.21894513706852,0.394460508223277,-3.0901575  
9919509,0.00200050314828927,0.00999124241427873,-5.61451777294578  
"Dcaf5",2046.0602712666,-0.126290018417223,0.104516410378587,-1.208327  
17043922,0.226921441344529,0.363138912435794,-0.127927979627656  
"Ntf3",104.665207901094,-0.116391264468566,0.230712210901417,-0.504486  
7977027,0.613919337362854,0.733333286767195,-0.0360993316772029  
"Themis",102.465798545643,-1.22613326133097,0.582165976200123,-2.10615  
754176173,0.0351906698805767,0.0887642537298169,-2.96941429091124  
"Oxtr",157.971924202715,-2.29833891073462,0.716461759006363,-3.2079017  
2237819,0.00133707180344304,0.00735823483588271,-11.2892918134549  
"Agtr1a",1569.90100036718,0.337740299861942,0.249324286501587,1.354622  
54640722,0.175537846306442,0.301846452710381,0.404557768676612  
"Fam110b",201.326177989389,-0.371826993566346,0.192980948858274,-1.926  
75492459837,0.0540101793707284,0.123254971602348,-0.778419859118961  
"Frm3",29.0217062719544,-0.902183614058729,0.590009674812008,-1.52909  
969543497,0.126239730860143,0.235194011486839,-1.30577051403441  
"Catsperg2",1.06841368729526,-0.548558964258879,2.14954639775444,-0.25  
5197545320232,0.798570526870295,NA,NA  
"Gm8186",84.5307977519275,-0.0276364458272246,0.320982834221417,-0.086  
0994510633572,0.931387359993604,0.95715968719524,-0.001210062863235  
"Ivl",542.176562724444,-3.84804867149945,1.10830804954249,-3.472002818  
24889,0.000516590913618307,0.00355040170381733,-21.7056670766914  
"C5ar1",406.970080873534,-1.46705325824725,0.339863875315793,-4.316590  
74352666,1.58457556389003e-05,0.000240811023731315,-12.2227513837507  
"Nrap",62.9465933268429,1.57353851064154,0.406900270423801,3.867135573  
54642,0.000110121214199184,0.00106876228693663,10.7649766949582  
"Plcxd3",11.6569598552559,0.243526053298894,0.571287309652244,0.426275  
97214987,0.669906764206117,0.776612288988101,0.0615668048245138  
"Ugt3a2",26120.2846204019,2.12908969719399,1.01889171470364,2.08961331

853922,NA,NA,NA

"Fam183b",2.69548328784907,-3.97496717289042,1.77893062446212,-2.23447  
003398027,0.0254521621069768,0.0694370024852153,-10.6025705608253

"Tex50",0.236555867302509,-0.100453541641953,4.06695318698895,-0.02469  
99503125153,0.980294294714312,NA,NA

"Zfp518a",867.669060855727,-0.584843321403136,0.189860325127252,-3.080  
38723209364,0.00206731623099442,0.0102409887885999,-2.67937610444523

"Myoz3",23.4680575842918,0.396893943993945,0.570914473682086,0.6951898  
44170872,0.486936336033693,0.623803198422138,0.187302327970944

"Frmpd4",80.0765267065189,0.0774896302659148,0.494339782863482,0.15675  
3781411347,0.875438899522265,0.922183844871549,0.00627748743887245

"Purg",442.216469932094,0.135030552500233,0.135665414485854,0.99532038  
443234,0.319580466651264,0.464665729102311,0.1034924107626

"Rtl5",896.238169891886,0.0579636020543962,0.342483085269804,0.1692451  
52672966,0.865603815328622,0.915516310891103,0.0051162789807323

"4930515G13Rik",1.24478060642391,2.49317534328348,1.75841854503359,1.4  
1785091514481,0.156234295539331,NA,NA

"Skint7",12.1240453508113,-1.85705922072653,0.810139939567452,-2.29226  
968086285,0.0218900862376063,0.0618076520896096,-5.16954793974662

"Olfr788",1.14942372930881,-1.24059016023997,2.14356392186996,-0.57875  
1185156042,0.562757073279788,NA,NA

"Pdp1",533.021627421897,-0.591858860199228,0.157572897154442,-3.756095  
56521087,0.00017258481322068,0.00151076654191052,-3.84420504058223

"Gm9833",0.668753656911699,-0.546328621656648,4.78471990594358,-0.1141  
81944271805,0.909093564675609,NA,NA

"Tigd2",805.903783121207,0.269285793942681,0.113407461287292,2.3744980  
3466199,0.0175728297623426,0.0520405581266944,0.7959366114916

"Apoo-

ps",4.60178349712889,-1.30211370552987,1.80706056291626,-0.72057004189  
6382,0.471174091360625,0.609093179960848,-0.64556716496952

"Gm7324",6.8184778599883,0.0231239409217114,1.01749294984511,0.0227263  
893329498,0.981868525625701,0.988407894710616,0.000269620931849817

"Hcar1",749.170241495649,-2.88904325035793,0.732964623789435,-3.941586  
20565007,8.09445327099402e-05,0.000839498137648092,-20.4622448298643

"Gm5316",12.8074000050202,-1.32947783571695,0.791830772347968,-1.67899  
238340376,0.0931535281794096,0.186854430262684,-2.23009990774293

"Lrp1b",0.985132912930552,-0.0619507366177694,2.02744703451123,-0.0305  
560320754343,0.97562360708221,NA,NA

"Kcnk3",1763.92539584526,-3.19348002703453,0.842061933571965,-3.792452  
6685205,0.000149166687818647,0.00135655414136567,-21.0859339186893

"Olfr509",194.484994152297,0.690173707267824,0.171642031139805,4.02100  
640900518,5.79500281499765e-05,0.000649136580996668,5.06578350468165

"Scn3b",14.2156910696806,-1.52599890440237,0.498943934567886,-3.058457  
67164997,0.00222479506875218,0.0108529032400625,-6.90258541587919

"Mblac1",176.673472795885,-0.480392479228169,0.260760253198982,-1.8422  
7647171975,0.0654347195328782,0.14247304985506,-0.936093948046391

"Iba57",740.436015392059,0.692367338786331,0.278928384036944,2.4822405  
2628014,0.0130559114532387,0.0415411490723317,2.20246952365604

"Lix1l",1580.02246886463,-1.45092832068174,0.207684846030463,-6.986202  
16358452,2.82427031235103e-12,1.52965618195057e-09,-29.4512663845567



"Prss38",1.49828526237668,-3.64550516289949,1.47612936853108,-2.469637  
98743954,0.0135249845267523,0.0427476330527828,-11.4922415901657  
"Zfp219",4160.59750911242,-0.290964935793671,0.149943443474961,-1.9404  
9789074144,0.0523192102669301,0.12035213782238,-0.616069762682938  
"Trappc1",1655.53468939376,0.309712530516792,0.168877629781482,1.83394  
64552975,0.0666619427570978,0.14456395950149,0.5989943298092  
"Prmt6",695.799924466553,0.125616461845131,0.0908859943234272,1.382132  
22818592,0.166931104503159,0.290168732780833,0.155424329736923  
"Syt12",462.306124344182,-0.766197504284064,0.358154384592029,-2.13929  
393927938,0.0324118702428428,0.0834499730615276,-1.90285759444997  
"Ccdc71",1572.27077615006,-0.140972027008624,0.135540428817453,-1.0400  
7363882909,0.298305689813158,0.442674913340791,-0.114880869024425  
"Fut4",242.519918933066,-1.46807569687362,0.221922386152816,-6.6152663  
6552431,3.70883312607498e-11,1.12991919206578e-08,-26.8636339717027  
"Sorl1",5607.14788620676,-0.3384131632583,0.252900214381879,-1.3381292  
0675226,0.180854321364622,0.308647488662355,-0.397823444070775  
"Fbxw13",0.145089169843486,-0.636494489189658,4.78471990596623,-0.1330  
26488843368,0.894172431602241,NA,NA  
"Zfp2",379.353486699493,0.422102663428972,0.163023904014166,2.58920718  
39495,0.00961971970881052,0.0328125536093079,1.4423012074342  
"Smcr8",1334.83371924186,-0.0108220060772696,0.168987605630095,-0.0640  
402355954931,0.948938189170612,0.968428323871889,-0.000347178680024979  
"Kmt5a",3831.97734000365,-0.175623037503274,0.302685827018067,-0.58021  
5595931391,0.561769237639952,0.689759231454899,-0.0652286234160747  
"Tenm2",134.945801955239,1.26395763080044,0.564065231886641,2.24080045  
950156,0.0250390031819972,0.0685681502575802,3.38731435103626  
"Retreg2",3875.29340471063,0.217215830230339,0.207306570410529,1.04780  
002775689,0.29473074972347,0.439011471207655,0.178818530561378  
"Gm5105",1.29649558627893,0.155100654766343,1.58944467066064,0.0975816  
633503048,0.922264485532251,NA,NA  
"Zg16",6.58926056802612,1.10494161306286,0.904344545891734,1.221814869  
21374,0.221777644281854,0.357669190091613,1.1360421502907  
"Rd3",18.2285000017236,1.6994871516369,0.484691754307882,3.50632569366  
42,0.000454338906254253,0.00320814928903259,9.75855898447246  
"Dcaf7",2948.08393856867,-0.426196659709692,0.17116756020831,-2.489938  
27563479,0.0127765282139269,0.040805363982825,-1.36337828250881  
"Brd8dc",201.955545963786,0.396127694810067,0.298764197491209,1.325887  
43275279,0.184876986295316,0.313182578521813,0.459891950164062  
"Olfr173",1.52099056337352,0.527190433483978,1.25500600034508,0.420070  
050134439,0.674434281050676,0.780191018209794,0.13085736114336  
"Olfr1183",2.39521561723781,0.974710278840317,1.06645026519056,0.91397  
6310621618,0.360729293554622,0.505970776615209,0.664047075781623  
"Krt8",10600.981960257,-0.616864625369364,0.215649284899768,-2.8604992  
8547677,0.00422974506222173,0.0174913190293106,-2.49586547315792  
"Cox7b2",0.125031169926583,0.4.78471990596324,0,1,NA,NA  
"Gemin4",417.737686567594,-0.187847387084283,0.174498327060883,-1.0764  
9964471431,0.281703859708,0.425589792080163,-0.160474139232302  
"Ogfr",3080.210943439,-0.465737378399429,0.18200687091877,-2.558899980  
25013,0.0105003947653502,0.0352548271191614,-1.557962704522  
"Rarres1",129.53223417248,-0.697349811784293,0.34509028890916,-2.02077

495135732,0.043303066928455,0.104273387294634,-1.57652598929939  
"Prokr1",7.5267594061196,-1.97459481970418,0.722270546038882,-2.733871  
44267944,0.00625944781935749,0.0236276808999876,-7.3955217247306  
"Zfp683",44.8308611690724,-1.46289729414156,0.578176418193211,-2.53019  
190701876,0.011400015493954,0.0375532188040405,-4.80122333690581  
"Tmem241",229.906153865907,-0.675464734583891,0.329326230883338,-2.051  
05051235099,0.0402620278984493,0.098349914803804,-1.56655375368665  
"Gm5417",1.1222743216496,-2.12748636639501,4.74580143820052,-0.4482881  
11944629,0.653945279141829,NA,NA  
"Tmem200a",128.963229240913,0.333225520283,0.333008626068443,1.0006513  
1710586,0.316995411166276,0.462217807876163,0.257156483073711  
"Zfp260",2116.54177474631,-0.166638532322587,0.136810909867406,-1.2180  
2078857665,0.223216072943614,0.359268712458654,-0.170585310605315  
"Chchd10",14122.0741678924,0.842013094963583,0.457194586767282,1.84169  
524166343,0.0655197406257811,0.142610393248658,1.63993744940976  
"Upk1b",3325.75270193139,-2.20758620043898,0.678223866887671,-3.254952  
10094782,0.00113411491685015,0.00647524821339507,-11.1257230364139  
"Cyp20a1",893.409780179177,-0.857569862491958,0.213793843761823,-4.011  
19998313577,6.04109105314625e-05,0.000670018164699918,-6.2672969867589  
6  
"Aff4",3957.20420607002,-0.502650046422416,0.149215273046426,-3.368623  
30618142,0.000755445975526289,0.00473318947005514,-2.69076411047652  
"Ctu2",839.697980299938,-0.222582323669441,0.23515463427819,-0.9465359  
86214602,0.343875276541887,0.488491701262753,-0.159465276452568  
"Tmem67",456.045522424771,0.089347434918394,0.143785040197465,0.621395  
903187772,0.534339166927718,0.66647703212575,0.0362526860134407  
"Ccnq",657.780818117445,0.0320684180234445,0.171122160084528,0.1874007  
31779004,0.85134644889058,0.905400903502742,0.00318687748287608  
"Slc36a3",1.83400312095829,-2.18592747849448,1.49266667743709,-1.46444  
448150187,0.143072541932925,0.258610218096613,-2.95632111393573  
"Pls1",1463.49283094058,0.936777102454574,0.268885895224932,3.48392057  
408191,0.000494126101308719,0.00342985785806956,5.31643156623658  
"Dtx3l",1269.61893262774,-0.820445226348881,0.281052655418204,-2.91918  
68873399,0.00350945756166952,0.0152569461621923,-3.43169298006942  
"Proser1",971.105674622685,0.128306722143518,0.147775824406432,0.86825  
2453734466,0.385256144643789,0.529852882010623,0.0814947705630255  
"Htr1b",74.8607472933183,0.658397703562492,0.39517980695951,1.66607122  
116933,0.0956992297704223,0.190791777307126,1.09068360666667  
"Espnl",22.0206215144612,1.25866304641102,0.399535497873916,3.15031593  
715416,0.00163093988386627,0.00858996916683537,5.98766166453413  
"Spty2d1",1176.54356631786,-0.404971857024691,0.0870125993914186,-4.65  
417491095698,3.25280595621865e-06,7.06271832231083e-05,-3.870759666468  
74  
"Rps23",9655.70963571696,-0.139631970000815,0.185347759819017,-0.75335  
1268648506,0.451238858086543,0.591871378971728,-0.073232211416697  
"Cdc42ep1",1771.86844449103,-0.562962454373409,0.148277548974192,-3.79  
668033541204,0.000146646693330603,0.00134114316442781,-3.7235647989624  
5  
"Tmem202",23.7070707744523,-1.33428496609023,0.555832452278861,-2.4005  
1648769299,0.0163719531832133,0.0493537945526118,-4.0145173833737

"Sall2",1049.94786521117,0.433795845033878,0.253170262105472,1.7134549  
7463346,0.0866288699582956,0.176646068442465,0.752031583633273  
"Tceal1",347.514254088982,-0.399026685329836,0.192886722143077,-2.0687  
0997078716,0.0385733109964186,0.095348239825753,-0.937800259870835  
"Tecrl",0.214384299096288,-1.10632709487695,4.77898884691053,-0.231498  
153755299,0.816927819578957,NA,NA  
"Adamts16",689.977818987721,0.826996963139414,0.388609811600916,2.1280  
9079557852,0.0333295563235474,0.0852163243111103,2.03653151354233  
"H1f1",0.97147109838154,0.83392087960913,1.64631268315712,0.5065385744  
40141,0.612478617205491,NA,NA  
"Clip1",2781.48100087271,0.0468588117141638,0.123022723949378,0.380895  
579368291,0.703280732835715,0.802937564634663,0.0102844933046736  
"Fzd9",9.83118790890467,-0.695591045914742,0.646149919501352,-1.076516  
49396094,0.281696328316784,0.425589792080163,-0.594229049887085  
"Polr1a",1249.96635692753,-0.169640888452333,0.124756999195458,-1.3597  
7051024252,0.173902557165125,0.299748487729438,-0.204385298399618  
"Tmie",744.035013349701,0.622356851497223,0.232989442646211,2.67118048  
109269,0.00755849943969071,0.0273018936782307,2.24098206150824  
"Lingo1",21.0634836924563,-1.36236470608123,0.499154614761514,-2.72934  
41065994,0.00634604459934547,0.02386866851814,-5.08868914745609  
"Defb20",0.302432356641651,-0.563484016601573,3.24811117862133,-0.1734  
80520097451,0.862273738436692,NA,NA  
"Olfr95",11.614386005667,0.575845507330697,0.519911499688784,1.1075837  
0929551,0.268041642144302,0.410225740857897,0.513105805270583  
"Ap5b1",274.523473037456,-0.0323300221271514,0.169069016582597,-0.1912  
23813686507,0.848350247236102,0.903082002224851,-0.00329578449074616  
"Aknad1",14.9232941805217,-4.07687139498141,1.29764210048004,-3.141753  
33358347,0.00167939454037397,0.00879292017943383,-19.2991280812373  
"Cfap46",20.8625375825832,-1.65204658491672,0.635858885918224,-2.59813  
399089493,0.00937319107453102,0.0321871221506174,-5.67674403765131  
"Zfa-ps",0.331402347483238,0,4.78471990595584,0,1,NA,NA  
"Zfpm1",431.744859201381,-0.397138851728254,0.218228275855884,-1.81983  
223837831,0.0687845566304201,0.148163657456229,-0.758311944287761  
"Tsku",2183.73096509782,-1.79398476745055,0.644037216155474,-2.7855296  
5954296,0.00534403507773046,0.0209274946667179,-6.93678556222595  
"Grm5",0.350800973219525,-0.559908898211391,3.86945834187174,-0.144699  
554496444,0.884948090916961,NA,NA  
"Ccdc69",314.903841826251,-2.50707413388122,0.4992765051839,-5.0214142  
0205179,5.12924148054259e-07,1.60787701587813e-05,-27.6731113155418  
"Vsig8",18.9836068601401,0.45365535496189,0.398353140669841,1.13882710  
752338,0.254775273121804,0.395447243697575,0.420873262743725  
"Zbtb45",536.564571243146,-0.387789595353276,0.133145341258146,-2.9125  
2845716485,0.00358515532018234,0.0154790430542328,-1.61641105059758  
"Hoxb13",0.143365925116282,-0.0582793077263913,4.78471990596623,-0.012  
1802966258737,0.990281769675646,NA,NA  
"Zfp644",1573.50943988542,0.0734090769972442,0.314203039773932,0.23363  
5795026241,0.815267736282361,0.88233183403827,0.00918986686893615  
"Gpr55",62.43449066767,-1.79861090765053,0.684262798119023,-2.62853820  
57811,0.00857527221876914,0.0299956779076628,-6.30719242650974  
"Omg",1.90523728153842,0.181930744671667,1.32587132102626,0.1372159890

53031,0.890860073014569,0.932561768321665,0.0127023846116793  
"Prss33",0.354174316968434,0.323809657020622,3.93656634613881,0.082256  
8778342149,0.934442444667504,NA,NA  
"Slc17a5",2580.78058569609,1.36772054054635,0.227558535994108,6.010411  
93454402,1.85052511451215e-09,2.45452644100394e-07,20.8169279298246  
"Tifab",725.311745266339,-1.22176941233492,0.402878138083146,-3.032602  
90604989,0.00242454414635198,0.0115597306871762,-5.44936979175081  
"C1ql3",85.5361721375916,-0.855084070720988,0.546465840421884,-1.56475  
301376724,0.117640832742568,0.22302002496982,-1.28304827261602  
"2310022A10Rik",630.067879824289,-0.085466520588777,0.131758430693153,  
-0.648660735705151,0.516557688701444,0.650131797979651,-0.036800189009  
2245  
"Olfr273",0.21381255255021,-0.0699091834513599,4.78471990595817,-0.014  
6109249497145,0.98834258333424,NA,NA  
"Gpr3",10.6892423167711,0.728163429292408,0.700862522520588,1.03895329  
810707,0.298826456779457,0.443216054639119,0.592505067717997  
"Spatc1",5.54746351684579,0.864619647674988,0.858699156096891,1.006894  
72155185,0.313985368840552,0.459133547446609,0.673032175205944  
"Zbtb5",728.402165320176,-0.580007966852454,0.185293516838009,-3.13021  
1875462,0.00174680263554742,0.00901751596184897,-2.73101761016583  
"Bdp1",1325.66798719563,0.0385511415369568,0.250764305707073,0.1537345  
65325218,0.877819029559227,0.923773558241121,0.00305665463793491  
"Aftph",3619.28723241914,-0.00613206317641505,0.105505685820612,-0.058  
1206892189791,0.953652494634386,0.971185435097736,-0.00017928837768063  
"Morn4",486.339995105223,0.547963653847236,0.276037227469622,1.9851078  
018364,0.0471324789695976,0.111244289426124,1.20334280913785  
"Zbtb14",944.551611065107,-0.243852022933432,0.119157388459408,-2.0464  
7001823561,0.040710149347349,0.0992536385845264,-0.563316876252168  
"Olfr714",7.77061532617625,0.318783722545003,0.869654520744322,0.36656  
3635260772,0.713944537593323,0.810320192909634,0.0670484445116977  
"Catsperg1",142.846123288169,-0.374183865758113,0.293481044216715,-1.2  
7498478396378,0.202314627736632,0.334384217310236,-0.409905177304057  
"Urgcp",2107.73889832727,0.169170389454222,0.156684913593942,1.0796852  
4584719,0.280282366227648,0.424099454967149,0.145112209521334  
"Cyp2g1",0.222265746865732,3.19052280584978,4.69750997731396,0.6791944  
71381224,0.497014649864957,NA,NA  
"Orai1",787.684240227662,-0.032084262689224,0.241024975785187,-0.13311  
5925371232,0.894101700608427,0.934584130811368,-0.00217061678925874  
"Pheta2",88.0223987115932,-1.47763254003102,0.407657420776448,-3.62469  
187293741,0.000289306168207832,0.00224736719829335,-9.01059714421696  
"Nckap5",274.057888282847,0.343992286941161,0.311713317036312,1.103553  
38748998,0.269786920598378,0.412120446398243,0.304928394434281  
"Nkx3-2",0.531089081118391,-3.03962661685067,4.72997966898757,-0.64262  
9953946776,0.520464241918946,NA,NA  
"Ucn2",20.8914374436631,-1.36581546443175,0.64527787902702,-2.11663146  
812221,0.0342911372582532,0.0871151262881331,-3.33330643728015  
"Nlrp10",167.500902434406,-1.03502423614262,0.44576148966446,-2.321923  
85421567,0.0202370361127161,0.0580041157120311,-2.94696376241155  
"Lig4",687.387129167143,0.584335274132234,0.118562562141267,4.92849735  
683005,8.28644554917363e-07,2.38654527795845e-05,6.21912627188121

"Prss46",3.65445177627552,-0.744769560311911,1.01739801549944,-0.73203  
3627907467,0.464148042835536,0.603129526105117,-0.376572844681952  
"Gal3st1",827.140613630691,1.64490920158491,0.359372560953481,4.577169  
71273673,4.71309090134588e-06,9.46404185318661e-05,15.2407843457444  
"Mmp12",1724.45008512579,-1.0380014657448,0.4821009091499,-2.153079253  
83326,0.0313124504168905,0.0812199226058974,-2.60600098847576  
"Zfp668",451.464154873364,0.166792094134654,0.175876971046646,0.948345  
273073969,0.342953710164584,0.487526351763565,0.119825264315486  
"Trex1",591.721825677859,-0.712656716627725,0.255503469331688,-2.78922  
520501109,0.00528343116422479,0.0207610521644609,-2.7613142607578  
"Olfr1361",0.0810182756847091,0.4.78471990596022,0,1,NA,NA  
"Zfp646",1484.51684787006,-0.317343398280999,0.118911329901921,-2.6687  
3979580201,0.00761364083630417,0.0274257277418193,-1.14125372899551  
"Rxfp4",0.130758055495986,0,4.78471990596536,0,1,NA,NA  
"Arhgap15",602.984795670084,-0.587018872711781,0.363518057098711,-1.61  
482727267212,0.10634810531277,0.206305378309462,-0.926549290738419  
"Rpl36a1",5969.70922792964,0.466630732864508,0.175363294293242,2.66093  
73115688,0.007792346357631,0.0278933668590213,1.67024235028165  
"Zfp672",1282.57935858786,0.349785515513073,0.221775998856809,1.577201  
84923578,0.114749087635999,0.218900079319706,0.531373137289504  
"Olfr1318",0.818614868174449,-0.362958091046538,2.14083337299251,-0.16  
9540560991529,0.865371471056361,NA,NA  
"Micos13",3918.69721364919,0.419668758504421,0.384317711696707,1.09198  
391261138,0.274840172315164,0.418201473372956,0.36586385324721  
"Zfp280b",570.092446946185,-0.236264605103909,0.178877212536329,-1.320  
8200293032,0.186561379610684,0.315269004996457,-0.272727090183155  
"Tmsb4x",65510.8296409212,-1.13983552243774,0.24974259579413,-4.564041  
30346005,5.01782001080441e-06,9.9630809135096e-05,-10.5024890856042  
"Fzd4",4861.90522936406,0.0680904872937514,0.278253622928464,0.2447065  
61507221,0.806683647137461,0.877006148119073,0.00893628245199682  
"Bag5",1182.86708842915,-0.107639415684737,0.117106421327581,-0.919158  
953578114,0.35801243707565,0.503079420294913,-0.0739490566055734  
"Lrrc19",3217.94855922334,2.27827479425016,0.992573310004722,2.2953214  
3498732,0.0217147100873374,0.0613791558832856,6.35794725362484  
"Sertad2",1803.17881518783,-0.0232818038141607,0.154791261924776,-0.15  
0407739588524,0.880442935425518,0.925356083276179,-0.00180612459387318  
"Armxc4",695.657167863297,-0.764415785961277,0.202237767773782,-3.7797  
8749654877,0.000156962262858389,0.00140839861997831,-5.01862045059096  
"Olfr466",25.2159733065246,0.657757601502991,0.539305623048323,1.21963  
794440922,0.222602155529565,0.358516853846169,0.67471433457896  
"Arhgap23",1266.69693013957,-1.32880447393027,0.189867659217573,-6.998  
58248322094,2.58565122815592e-12,1.48279493078189e-09,-27.013714041799  
2  
"Fam161a",448.524963997239,0.078871253694076,0.212759821690826,0.37070  
5582789445,0.710856831696485,0.807944418794408,0.0168202422082139  
"Zbtb12",482.947738844445,-0.425496103006725,0.199924875440855,-2.1282  
7994549683,0.0333138798343578,0.0851985872259061,-1.04789921934824  
"Ceacam19",18.4029881925071,-1.61420304839788,0.691947614291696,-2.332  
83996513267,0.019656546247467,0.0566789912353018,-4.63333040254888  
"Suox",2067.43710455652,0.502521943642518,0.4067350496255,1.2355019418

789,0.216643754198963,0.351922012777754,0.524806622224442  
"Olfr250",3.86618489279301,0.597827684941877,0.73247140271069,0.816178  
874328021,0.414397837608451,0.557736525001007,0.349052816753786  
"Arl4c",2276.28878961876,-0.973143598875588,0.376621790260529,-2.58387  
492184776,0.00976972175208779,0.033166969280104,-3.31472250452231  
"Nlrc3",374.889664531741,-0.328098600189729,0.354413911966994,-0.92574  
9777622398,0.354576032530001,0.499676458678083,-0.227632995296529  
"Calhm5",221.616730782548,-1.47440496924905,0.29257792412405,-5.039358  
22794314,4.67095483457098e-07,1.49793219349449e-05,-16.3789286709292  
"Rlf",1205.34384408276,0.192144924050208,0.103372162015012,1.858768553  
39742,0.0630599516357542,0.138590735894925,0.379722569989505  
"2810025M15Rik",924.808212875331,0.572302569669136,0.232695287880737,2  
.45945061836602,0.0139149839201343,0.0437462683771007,1.79093445351954  
"Vcpkmt",408.219454066616,-0.0927445920423186,0.197815355692532,-0.468  
844249818873,0.639180968158864,0.75319636903273,-0.026286535073271  
"Rasd1",1010.22495314363,-1.05744743261588,0.436295432334651,-2.423695  
85892155,0.015363466248191,0.0469749353537217,-3.23382346520731  
"Olfr808",2.11922552205353,1.57540522957108,1.0952742209766,1.43836602  
688081,0.150330226709043,0.268517658517124,2.07140360633492  
"Stkld1",16.118045848535,0.509172286644093,0.413225029803019,1.2321912  
9994815,0.217877632441046,0.353188694939162,0.529922492324129  
"Tmem17",146.190166774001,-0.187223831224054,0.246593304785459,-0.7592  
41340258374,0.447708200516586,0.588564335853014,-0.0992415558270835  
"Rasl11b",2669.81231749626,-0.802586520901176,0.197972681971035,-4.054  
0266106947,5.03434858099236e-05,0.000581514980048513,-5.97916831459297  
"Gja8",0.111137623211519,0,4.78471990596623,0,1,NA,NA  
"2610318N02Rik",24.7468768706032,-0.975729115711998,0.714979074528683,  
-1.36469604562232,0.172348603032451,0.297660520728266,-1.1823901367966  
9  
"Slc35c1",814.855081733569,-0.193078563362237,0.194553415298885,-0.992  
419295572979,0.320993030165562,0.466268501986749,-0.147317713214009  
"Olfr921",1.81343398540895,1.21140193056338,1.27015926584143,0.9537401  
82937513,0.340215174667381,0.484870658260696,0.876901280041327  
"Glp2r",0.423996015782847,-2.10160252081108,4.68116106039955,-0.448948  
988017026,0.653468455991377,NA,NA  
"Lpar4",137.890573162328,-0.849962051041898,0.410474011320006,-2.07068  
4203145,0.0383883174228653,0.0949867275521609,-2.0008260585168  
"H2ax",848.786770234766,0.0780837855633035,0.215727915381746,0.3619549  
44148645,0.717385700118945,0.812712008652559,0.0161928955984801  
"Lrrc4",53.0126525820222,-1.87172102476262,0.595152201852359,-3.144945  
13997773,0.00166117977575203,0.00871283027500865,-8.87749532265446  
"Pgrmc2",3864.12697113779,-0.638709740412919,0.3560934180879,-1.793657  
80991564,0.0728678032461881,0.154853016642417,-1.19137179670959  
"Rpp38",271.332664209286,0.0188085737413,0.21014064756684,0.0895046910  
680025,0.928680825615709,0.956091596063947,0.000844534278623366  
"Ccadc137",1266.59288913785,0.130396194820351,0.161102439948248,0.80939  
9254674472,0.418285530784283,0.561310141756832,0.0753014148059704  
"Mrps16",1546.47378169462,0.158505748592444,0.229043534615372,0.692033  
280304632,0.488916429372007,0.625476841407741,0.0743773918365061  
"Plekhf2",1945.63047882913,0.185746788365964,0.160988958211343,1.15378

588960194,0.248587960537172,0.388069411754362,0.175822534185164  
"Glt1d1",702.792463057768,1.49755296271048,0.521976603640958,2.8690039  
9800404,0.00411766593822652,0.0171735295109178,6.08663338954877  
"Ankrd55",17.1545967523977,-0.408437332743252,0.467590701077516,-0.873  
493274785081,0.382394270305713,0.527258983779881,-0.261425796390635  
"Lrrc25",390.257887032148,-1.37187162405207,0.39292744689571,-3.491412  
05301495,0.000480474619038645,0.00335300433858823,-7.81678529296437  
"Ppp1r3d",258.905746409451,-2.2768501111953,0.506347540138376,-4.49661  
532980504,6.90437361742051e-06,0.0001268816934896,-20.4284808258164  
"Idnk",2001.53341814307,0.186387375824589,0.143371374232133,1.30003201  
003576,0.193589998369969,0.323806964760887,0.210171845477792  
"Shisa3",1232.70432980284,-0.953911005204985,0.269465366445253,-3.5400  
1338943418,0.000400106732314209,0.00289472395794525,-5.57548154711286  
"Apol10b",143.342767392186,-1.65036982171437,0.481152506091869,-3.4300  
3476199136,0.00060350392718813,0.00398075763610086,-9.12041088250145  
"Pitpnb",3858.22369829659,-0.0382958253518422,0.138823242905259,-0.275  
860328215914,0.782655345476893,0.859488252667331,-0.00579868195093006  
"Amz1",522.348390258567,-0.648681761109926,0.31825113786348,-2.0382700  
4504911,0.0415229338600084,0.100723334710431,-1.48896970143878  
"Rap2c",1467.43223309336,-0.298827784442386,0.151752006144378,-1.96918  
506736628,0.0489318430164271,0.114442583828658,-0.647763619307319  
"Olfr728",0.0868602420236823,1.37431944116025,4.78471990596623,0.28723  
0907591176,0.773935522099994,NA,NA  
"Fhl4",7.11065132778443,-1.42576188884566,0.609544451158828,-2.3390613  
861468,0.0193322567349938,0.0559923264733972,-4.10981656602727  
"Tmx2",4534.59508292256,0.434362821373346,0.239646656767016,1.81251358  
659943,0.0699068765287133,0.149933371307541,0.824231372161599  
"Ccdc158",88.7999880116552,0.303006102758817,0.515827571055166,0.58741  
7423498699,0.556923394819573,0.686316037934018,0.114056666558751  
"Tdrp",1625.6295874821,-0.238814411530673,0.32826132629101,-0.72751308  
9126311,0.466911699988564,0.605469827505788,-0.119825261841349  
"Prm3",0.145842946244176,2.09870209063446,4.75617210313392,0.441258651  
942303,0.659025756395086,NA,NA  
"Klk6",0.329796437349633,1.08119187501631,4.76049911119475,0.227117335  
758721,0.820332504268121,NA,NA  
"Zfp697",1880.17471994081,1.13587881096869,0.276980605414339,4.1009326  
6013882,4.11488302078714e-05,0.000498645053693646,8.63678633585571  
"Grem2",135.293051852182,-1.11662818444975,0.70167773149354,-1.5913689  
9224801,0.111526558366646,0.214102370413237,-1.72106015063529  
"Bex1",177.931436629569,-0.330607746283724,0.269236406971286,-1.227945  
91564648,0.219467271508406,0.355206512814054,-0.342197509090699  
"Spink8",593.479224116545,-0.26171200205692,0.689213114676429,-0.37972  
5801038752,0.704148965769847,0.80365361648451,-0.0572068225249821  
"Gpr171",105.604787715808,-1.10014594030316,0.474532649481036,-2.31837  
775863538,0.020428799739342,0.0584133652027703,-3.12464611622172  
"Rspry1",1678.01595716041,0.182596530876214,0.0921481163843648,1.98155  
467567643,0.0475291042245093,0.111950045200469,0.39983208602722  
"Cby3",13.3840895040441,1.18119661413522,0.669410723879641,1.764531956  
23977,0.0776424600334431,0.162519880379181,2.14618102777142  
"1600012H06Rik",1717.58140107987,-0.0604835625320786,0.110791272969342

, -0.545923527287347, 0.585118505100303, 0.708963498163417, -0.02080339617  
07213  
"Akap4", 0.215713028821551, 0, 4.78471990595633, 0, 1, NA, NA  
"Sprr2b", 0.287025600503569, -1.0809510848998, 4.77945885888876, -0.226165  
99845597, 0.821072314766984, NA, NA  
"Ces2b", 525.586197331891, 1.30717508646741, 0.26846728033515, 4.869029420  
77543, 1.121477115545e-06, 3.01607735157191e-05, 13.6063441265821  
"Hmx2", 407.733874397452, 2.00154228421723, 0.73213406424657, 2.7338466845  
9184, 0.00625991847346443, 0.0236276808999876, 7.49644904270184  
"Agmo", 289.8945767841, -1.88898727175406, 0.694225587663774, -2.720999204  
46743, 0.00650849181568462, 0.0243341463896872, -7.0192400377731  
"Grrp1", 651.745744919512, -0.575977032325736, 0.214575595395894, -2.68426  
160609297, 0.0072690202890805, 0.0265414527334254, -2.09024801732285  
"Tmc8", 204.991814275456, -1.55559623586528, 0.308607598138339, -5.0406932  
4685895, 4.63848466350619e-07, 1.49078889875411e-05, -17.2883054744252  
"Haspin", 142.219244265458, 0.741993626507253, 0.328019481372672, 2.262041  
33791753, 0.0236948494010936, 0.0655787329485482, 2.02156447610559  
"Bpifc", 79.9355771709191, -1.58164064457437, 0.670341978385506, -2.359453  
37689234, 0.0183018804782202, 0.053645530000652, -4.62686373854598  
"Prdx6b", 0.730260256044642, -2.19712701175233, 2.12727263745241, -1.03283  
752776681, 0.301679938327918, NA, NA  
"Vwa3b", 11.0650149039094, 0.180140496961827, 0.768511979952797, 0.2344016  
77086272, 0.814673156784686, 0.882031051751225, 0.0226126794601118  
"Olfr1023", 0.114518533427629, -0.0634343222640453, 4.78471990596623, -0.0  
132576877039232, 0.989422205539938, NA, NA  
"Sarm1", 23.9257538501229, 0.241181103368724, 0.369078854010267, 0.6534676  
82442775, 0.513454817430674, 0.647354803120807, 0.104880196181458  
"Kcnk12", 8.56240951371405, -0.912896141137978, 0.912862483615222, -1.0000  
3687031, 0.317292665120607, 0.462407628627794, -0.704124520287211  
"Fam205c", 0.150840222250025, 0.0236836517937881, 4.7847199059555, 0.00494  
985124715645, 0.996050606238997, NA, NA  
"Slc25a44", 1743.66891542339, -0.728855620392602, 0.402662838532263, -1.81  
008911338662, 0.0702819689542389, 0.150522608816976, -1.38019160113895  
"F2rl3", 60.6294202518272, -0.873058632720006, 0.332946344413345, -2.62222  
020865958, 0.00873589650033436, 0.0304654820181577, -3.04798822602144  
"Ubqln2", 1507.75767655611, -0.423276405687623, 0.257498552549746, -1.6438  
01106827, 0.100217292672768, 0.197685734766119, -0.686163522040308  
"Slc9b1", 4.86211726889163, 0.57103827393084, 0.901748071654157, 0.6332569  
94809353, 0.526565831928186, 0.659026933110968, 0.238117749874454  
"Gm867", 83.7941160605321, -0.196412436777808, 0.412132253631201, -0.47657  
6232622573, 0.633663911168344, 0.748707971152611, -0.056842989362968  
"Olfr165", 0.181588266188855, 0.00835216785474959, 4.78471990596461, 0.001  
74559180451458, 0.998607219957035, NA, NA  
"Mchr1", 29.2585782105488, 1.95392244337545, 0.540653132313206, 3.61400374  
213225, 0.00030150470606919, 0.00231720092981358, 11.8552198836472  
"Nudt6", 490.231302929601, 0.947477466425908, 0.182814837548924, 5.1827164  
5304692, 2.18677355074732e-07, 8.2456588118601e-06, 11.0910041824007  
"Lsm10", 567.627961993684, 0.00194139944779943, 0.181572694054478, 0.01069  
21332963036, 0.991469074466148, 0.994470947578839, 1.07638838537819e-05  
"Eif5a2", 308.262226534655, -0.0889612090874983, 0.285334569086553, -0.311



778588105506,0.755208797723946,0.841054217842108,-0.0153991099237779  
"Scd4",46.2642722029018,-0.983587541790132,0.246339986350852,-3.992805  
05110222,6.52962498443959e-05,0.000711569972138382,-7.12907869963684  
"Lgr4",5221.55295253682,0.974130840292435,0.248319951940979,3.92288590  
859573,8.74945903474618e-05,0.000890016462292256,6.84255862051107  
"Otop2",0.194214036749975,-0.0531768805041202,4.78471990596091,-0.0111  
13896225748,0.991132576340244,NA,NA  
"Pla2g4e",1.00427364490631,-0.688230587986069,2.48225008205024,-0.2772  
60777615774,0.781579874281131,NA,NA  
"Eva1b",2229.41247983371,0.115071945697139,0.332577975309369,0.3459998  
98490264,0.72934279102471,0.822340006904516,0.022508226285137  
"Snip1",794.762047304576,-0.111799939513739,0.132711624944656,-0.84242  
7628780543,0.399548633330995,0.543794074272258,-0.0681068063218499  
"Lgsn",0.645956181796341,2.36859390175738,2.81403853223442,0.841706278  
938779,0.399952382776304,NA,NA  
"Il17d",60.2800557747032,-1.55135566233303,0.281225034777494,-5.516420  
91025239,3.45973078775346e-08,2.02247398202931e-06,-20.3401173762958  
"Pigm",1464.11691059458,-0.180508392007511,0.0994420899357468,-1.81521  
116585688,0.0694914644201041,0.149272289662134,-0.343323927864193  
"Cxcr3",309.934014925488,-1.63253272317242,0.46099318508622,-3.5413380  
8478553,0.000398103113522032,0.00288236706552268,-9.54891804328027  
"Gja4",448.948772467066,-0.3147495522786,0.207874296857947,-1.51413405  
618727,0.12999184262964,0.240062601590522,-0.449102145431939  
"Hic2",376.516059233148,-0.408264776676537,0.235662927382212,-1.732409  
84999898,0.0832006154550663,0.171213255951755,-0.720524208464696  
"Klre1",39.0146654813091,-2.1126344263592,0.371618220109002,-5.6849592  
1900581,1.30843878655722e-08,9.81228440780486e-07,-29.2271576053703  
"Heatr1",1212.53967011204,-0.0560473567436386,0.112394666135322,-0.498  
665627745699,0.618014963085036,0.736429065959554,-0.0171472605973043  
"Evc2",1887.93316553289,0.676887429892787,0.319862254655314,2.11618413  
877,0.0343291496730012,0.0871776192138809,1.65147512382097  
"Olfr690",0.131497130174101,-0.152464228627251,4.78471990596527,-0.031  
8648179253228,0.974579855611723,NA,NA  
"Tmem220",323.184491654039,0.363560667245726,0.301842750402164,1.20447  
042959068,0.228407804623834,0.364891058955798,0.366526027492591  
"Prag1",564.846295683816,-1.04383984025915,0.334230097087277,-3.123117  
42525861,0.00178946338281571,0.00918183079951073,-4.89616068795369  
"Dscam",13.608797012864,-1.80046208017473,0.987904829110623,-1.8225055  
9681505,0.0683783052927111,0.147466010020715,-3.44636812079607  
"Mrpgrg",1.18909127530685,-3.78718363676327,2.43703360284696,-1.554013  
71254752,0.120181145774172,NA,NA  
"Fzd2",567.445108030388,-1.09787325682687,0.301436717806506,-3.6421351  
2148046,0.000270386075576744,0.00213209003980534,-6.75263693681591  
"Foxc1",1254.44471384121,0.160729725476877,0.234472118196562,0.6854961  
12344304,0.493030913021187,0.629342315887709,0.0744307129030288  
"Abca12",0.481186282181953,-2.17224681974577,3.74717154363577,-0.57970  
3062549972,0.56211487743886,NA,NA  
"Gm9843",332.221295305652,0.0321012110399829,0.704883410331731,0.04554  
11640697794,0.963675964735326,0.978160984057015,0.000708827390483259  
"Slc25a2",15.213266114269,0.191236278293605,0.405715996885426,0.471355

035940598,0.637387219764079,0.751786099507593,0.0545603675982237  
"Rictor",1929.65580681699,0.140990328052579,0.15698543097898,0.8981109  
08594168,0.369126423909485,0.514124366982438,0.0937994671488133  
"Nsun3",586.988566416363,0.0282032628920386,0.158548119373256,0.177884  
562765718,0.858813634618746,0.910656311061361,0.0026395354342702  
"Synpo2",830.055668221559,-1.24183212144199,0.327378060209628,-3.79326  
617259207,0.000148678634853531,0.00135401028602249,-8.20190937371911  
"Neto1",1.56139207089876,-1.05598207299877,1.89054307329634,-0.5585601  
76657368,0.576461924770372,0.701920602583696,-0.373748997145343  
"Ndufaf6",645.248897308813,0.922189831133026,0.24884453355488,3.705887  
43887214,0.000210651843915375,0.00176075451034255,5.84853977093276  
"Hoxc12",0.100532412451372,0.4.78471990596383,0,1,NA,NA  
"Amer1",854.7378434172,-0.0219969619217901,0.187945409789342,-0.117039  
10165428,0.906829067756256,0.943050351856775,-0.00128980511281223  
"Lgals3",6748.93411808778,-0.396290314493585,0.162555119128809,-2.4378  
827109072,0.0147735665991132,0.0457157596491842,-1.22267933825939  
"4930486L24Rik",28.7121354467187,-0.365172476252979,1.00334642814933,-  
0.363954528573483,0.715891964956183,0.811632837115691,-0.0762141294618  
623  
"Gpr18",72.2175658934375,-1.51116487979919,0.519336310004847,-2.909800  
16356854,0.00361659918167896,0.0155827258775188,-6.28885211842914  
"Carmil2",308.012258374949,-1.05769813411599,0.324041948658385,-3.2640  
7780997221,0.00109821000711704,0.00632021803977807,-5.35618501328691  
"Sprr1a",5800.12249249982,-2.72615026359797,0.727717040945436,-3.74616  
796118477,0.000179556394109263,0.00155599580992996,-17.6263049528663  
"Olfr524",0.0843067902683353,0.4.78471990595952,0,1,NA,NA  
"Hoxd10",1073.90040886214,-0.00406796747225752,0.34164049421707,-0.011  
9071583758828,0.990499686662449,0.993710465168224,-2.56664229188108e-0  
5  
"Ch25h",305.662149481955,-0.448743452522805,0.43397618368744,-1.034027  
83237985,0.301123151957699,0.445842449454872,-0.362490312734772  
"Snx21",916.017590164682,0.210270837748132,0.132349559462904,1.5887535  
9012486,0.112116034815625,0.214970837529262,0.32323945499875  
"Il31ra",15.7314461025768,-0.958880744097922,0.472583007961094,-2.0290  
2078141765,0.0424561736814723,0.102569521611898,-2.18357708694769  
"Sept6",863.85732013252,-0.59542584249057,0.219124830147187,-2.7172906  
0595561,0.00658187883917218,0.0245661320073084,-2.20687832359164  
"Kif7",303.169575855598,-0.997218690830779,0.218335708167156,-4.567364  
17144976,4.93895514294289e-06,9.85667833951898e-05,-9.19911928078718  
"C77080",2590.62614493662,0.0933147410354391,0.190563349494368,0.48967  
8321057204,0.624361544750043,0.741734001995496,0.0278791401563817  
"Armcx6",165.591249342782,-0.736220933702612,0.252183336229749,-2.9193  
8771494356,0.00350719717400063,0.0152569461621923,-3.07940631358255  
"Tnfsf15",220.946480842076,-0.302842785477074,0.510589890571858,-0.593  
123348247048,0.553098605967178,0.682767750500033,-0.115564964546793  
"Foxl2",0.526306838582215,2.03508863147303,3.53163705449308,0.57624512  
3740535,0.564449509053179,NA,NA  
"Tcf19",386.389838391168,-0.465311332894264,0.244595030494002,-1.90237  
443481369,0.0571222208004802,0.128804100979272,-0.953638186182689  
"Ppp1r3g",11.7335240109672,-3.77151732265344,1.73633217107932,-2.17211

740096311,0.0298468087847287,0.078356412775635,-9.6041215888942  
"Mrgprb2",2.26208311668259,-3.84446932622433,1.60019816692736,-2.40249  
576938732,0.0162836229129868,0.0491688311710717,-11.581446041594  
"Fbxo46",617.423059130698,-0.278720958700765,0.120251153637846,-2.3178  
2357398561,0.020458911363679,0.0584723037706221,-0.791345124754879  
"Enthd1",0.348200537122973,-1.99248749130102,3.10046017829563,-0.64264  
2503602907,0.520456096861855,NA,NA  
"Hamp",5.79094959359163,0.746410495883702,1.15310563205064,0.647304527  
128456,0.517434872135974,0.650899686252078,0.32050847318341  
"Cyp8b1",24.6146034997134,-1.02384515405048,0.654227682477869,-1.56496  
764272141,0.117590496493784,0.222986542164932,-1.53642694235723  
"Lypd6",168.444845910807,-0.133033626387893,0.392798824392138,-0.33868  
1325214668,0.734849810414384,0.82663714322158,-0.0253281980247804  
"Krt78",20.8485401419771,-3.13436082597352,1.04511369761053,-2.9990620  
4764104,0.00270812149517992,0.012539290646644,-13.7250159884227  
"Astl",0.415240773074194,1.07645399727758,3.76818735165796,0.285668916  
330276,0.775131714167977,NA,NA  
"Fam118b",688.848226185339,0.140080502985176,0.16815458792119,0.833045  
977019837,0.404818799639846,0.54859306056281,0.0841041028476368  
"Slc35d3",6.22068660378322,-0.064689391451865,0.721932529814768,-0.089  
6058686654041,0.928600420650094,0.956091596063947,-0.0029046545100027  
"Gm8394",0.148177164577155,2.59891947282789,4.7275994170606,0.54973343  
6265582,0.582502219767124,NA,NA  
"Fam167b",503.999955233777,0.212868535777234,0.334326648013795,0.63670  
8252368954,0.524314897211269,0.657179986232021,0.0893616464446341  
"Fbxl22",173.664935120458,-0.125288179609666,0.310984593624936,-0.4028  
758407266,0.68703956499914,0.789937666544033,-0.0295431080770907  
"Pcdh20",6.51348774555798,-0.0781214603959958,0.713339977012,-0.109515  
045999843,0.912793988564676,0.946353538447837,-0.00430754392772102  
"Oprd1",8.53989560652076,-1.79194173218315,0.857809484080044,-2.088974  
02679677,0.0367100612749762,0.0917892760630271,-4.27962241485876  
"Clcn8",2706.98840267382,0.123383333232706,0.441251641653505,0.2796212  
44626651,0.779768106179344,0.857497366018682,0.0189686046793399  
"Fam171a1",2144.16083683977,-0.15770763200161,0.156082384788739,-1.010  
41275231072,0.312297580723258,0.457374760062674,-0.123367138973653  
"Htr5b",0.255434488157135,-0.54058796329193,4.78471990595381,-0.112982  
154424391,0.910044703320519,NA,NA  
"B230217C12Rik",68.1564552385753,-0.802821889182532,0.281354782547235,  
-2.85341475952253,0.00432521297056257,0.0178030404264363,-3.2340764795  
8653  
"Adra1b",133.139463800616,-1.16079779854257,0.337912815818718,-3.43519  
909338187,0.000592118638376655,0.00392062018550818,-6.43256730039511  
"Fam228b",59.6440356034726,0.182264150111847,0.362874717696442,0.50227  
8448244822,0.615471667083314,0.734647478713833,0.0562037963644315  
"Fam241a",683.00667169969,-0.529228493480361,0.279530658992376,-1.8932  
7530435506,0.0583212675429344,0.130751762050378,-1.0766913957462  
"Gm11868",0.855890151280042,2.87358506246409,2.4369930494626,1.1791519  
3196705,0.238337682606151,NA,NA  
"Lamtor4",4046.01335657805,0.849666943138788,0.211488593066882,4.01755  
447335208,5.88052442876916e-05,0.000656692241192103,6.2266100787715

"Hyls1",237.780649769548,-0.163709548034648,0.193030782476784,-0.84810  
0732608994,0.396381873666425,0.540843511039045,-0.10062003018611  
"Kcnb1",1026.13829808629,-1.95956710203277,0.5182285945502,-3.78127938  
643291,0.000156024452659634,0.00140256559610767,-12.8732823131211  
"Prokr2",0.809787295315729,0.127764136019188,2.54068611114459,0.050287  
2572329015,0.959893478177851,NA,NA  
"Tor1aip2",5148.10168054494,-0.0203464311954697,0.129034866374431,-0.1  
57681654324568,0.874707657357665,0.921844759913505,-0.0016557608871771  
7  
"Maml1",1107.59483967799,-0.607368184265361,0.123880437454852,-4.90285  
792288001,9.44523006172132e-07,2.65364691272972e-05,-6.39983283472328  
"Mmp13",94.9621808262203,-0.409585019420956,0.488137650034152,-0.83907  
6886186304,0.401426165657184,0.545436054214898,-0.248278030292823  
"Lrrc4c",12.2869486005962,-1.0484006580549,0.869320081369952,-1.206000  
73611867,0.227817206598485,0.364237436612871,-1.05883153757426  
"Fam78a",319.763239615185,-0.776726562841407,0.300978278195985,-2.5806  
7315520901,0.00986078911409049,0.0333968501209895,-2.64032170485546  
"Zfp831",85.8243642211958,-1.22435183086846,0.493035618441925,-2.48329  
285972809,0.0130174017990311,0.0414389061677563,-3.89776700009156  
"Zfp61",455.617168996239,-0.0346638995427585,0.209344761312152,-0.1655  
82837256058,0.868485254715097,0.917552810997049,-0.00298266012515643  
"Micos10",7973.29080571807,0.726101740961271,0.261957254131469,2.77183  
292124776,0.00557416391838602,0.0215303185579815,2.78699135429883  
"Txndc2",1.33238399932436,0.90804137495003,1.27331817434968,0.71312998  
8436545,0.47576532423596,0.613361034908275,0.443852033769704  
"Olfr125",0.347113022069089,-0.0671103590616331,3.13540539561152,-0.02  
14040452808955,0.982923346638448,NA,NA  
"Zscan29",1624.78926588009,0.359939437705691,0.099366517375249,3.62234  
127967282,0.000291948596438634,0.00226338795330315,2.19235241935725  
"Rps27rt",4889.45165988466,-1.51189213901895,0.6184868835435,-2.444501  
53955871,0.0145052461702612,0.0451577981522836,-4.68322544444839  
"Catsperz",30.2170886639964,-0.757097032521632,0.509692974428117,-1.48  
539821128809,0.137438369224722,0.250750755417202,-1.04728917519535  
"Ccdc121",2.2434787651262,0.771364257250795,1.11405932375782,0.6923906  
48146917,0.488692037138113,0.625312858650671,0.362157972218937  
"Gpd1l",2019.3368312413,0.141026345086177,0.156533416855458,0.90093443  
252695,0.367623182384832,0.512653183388603,0.0942275588879842  
"Ubal2",3325.54612979151,0.272806414383142,0.128074845730954,2.130054  
60069985,0.0331671058468269,0.0849346243500697,0.672706092502151  
"Sprr2f",240.072968186096,-2.62363251381048,0.582657370580322,-4.50287  
363772188,6.70407481690631e-06,0.000123901469933686,-23.6022608135596  
"Tmem150c",1205.06218747489,-0.234066944510437,0.438261442276371,-0.53  
4080623872981,0.593285754708404,0.716056059752674,-0.0781776149796998  
"Defb19",25.7259833987527,1.50764916112763,0.71365202216657,2.11258304  
369484,0.0346364712873346,0.0877523281133641,3.66846754967355  
"Mrgpra1",0.108229817038987,-0.909962624367568,4.78339755770097,-0.190  
233534509919,0.849126134161093,NA,NA  
"Trhde",27.1664423257255,-2.01588508642529,0.705035906565221,-2.859265  
8439855,0.00424622771468794,0.0175483145360291,-8.14981492867702  
"Vstm4",1033.83293955836,-1.40680240831628,0.333445615162836,-4.218986

07852221,2.45403423756111e-05,0.000336489167116502,-11.2501209255699  
"Gpatch11",1197.09885416905,-0.529387527872224,0.275936389552005,-1.91  
851291789281,0.0550460057359006,0.125048004175532,-1.10062715363768  
"Ism2",4.7136485790353,0.663688431311451,0.764440099166478,0.868202010  
903297,0.385283753594544,0.529853479163945,0.421544869665442  
"Gp1ba",1.8786675089855,-0.123929552981283,1.37130514751297,-0.0903734  
323509575,0.927990468197022,0.955734108858311,-0.00561097661835239  
"Ccdc96",58.656753566102,-0.159228241821787,0.340275072102564,-0.46793  
9778362,0.639827656078878,0.753570500647899,-0.0450508765439373  
"Prkaa1",1797.63077477837,-0.46593723336302,0.159605706603852,-2.91930  
184250552,0.00350816353732596,0.0152569461621923,-1.94888516811835  
"Emilin3",1.95029052036657,-2.03989001808288,1.5890815802972,-1.283691  
18576113,0.199250029706465,0.330678215135204,-2.25736174675093  
"2310061I04Rik",2729.46952185075,0.990038183347179,0.228489087082676,4  
.33297798152149,1.47105827357412e-05,0.000227821240811343,8.3034000171  
6764  
"Ftl1",117483.924895955,0.524542400510223,0.203403203088289,2.57883058  
155452,0.00991353934736935,0.0335427619037641,1.78078692404357  
"Scg2",3.52303535995374,-0.569570737450601,4.58075857010106,-0.1243398  
29033608,0.901046212963581,0.939396805708689,-0.0356080279381465  
"Zbtb26",511.332418609048,-0.21885733677777,0.124418232540965,-1.75904  
55378452,0.0785697742102173,0.164003153575722,-0.395665530761063  
"Plekho2",961.25504669594,-1.66358656513627,0.256866308846323,-6.47646  
852795924,9.38941895856583e-11,2.26018383770514e-08,-29.287831739762  
"Arhgap42",2113.46577021092,0.887698334209815,0.206149205881631,4.3060  
9630734897,1.66160738133696e-05,0.000248719721517747,7.3671717338733  
"Vamp8",9148.38676998876,0.854452546887942,0.301312073447779,2.8357726  
8282291,0.00457149711862751,0.0185389040804907,3.40745749666898  
"Ptges",1901.25431839149,-1.21916155227708,0.485277313725469,-2.512298  
67499386,0.011994752331191,0.0389594670920477,-3.95646388531648  
"Trim15",5.81530532548289,1.22066711205826,0.689854128097278,1.7694568  
4941401,0.0768176657142515,0.161035463508921,2.22909764876304  
"Pgbd5",58.1967856995505,0.609979933911631,0.345410607626173,1.7659559  
9684591,0.0774032315040723,0.162053925466166,1.11005742000215  
"Defb6",0.348597219379843,-2.03662884031691,4.74788653358629,-0.428954  
825670308,0.667956100161241,NA,NA  
"Gp1bb",69.4264089363919,-0.754041145214165,0.463452698904161,-1.62700  
777662338,0.10373544616481,0.202851642695965,-1.20290705317871  
"Prss27",65.7006244231874,-2.32404231517136,0.686486899024471,-3.38541  
393648433,0.000710709920998654,0.00452229565346252,-12.5468898111572  
"Olfr1395",0.103069607447589,-0.492459626968356,4.7813719837464,-0.102  
995464197808,0.917966570855388,NA,NA  
"Olfr1124",25.6563819722926,1.28900257035659,0.554844112355111,2.32317  
968534486,0.0201695016206345,0.0578634010065126,3.67323221406144  
"Tmem37",1592.75342388391,1.39468645727225,0.298909011236465,4.6659230  
8978241,3.0723461219743e-06,6.76124206391139e-05,13.3913872529458  
"Ccdc126",239.885892230298,-0.313345136941242,0.141362474619009,-2.216  
6076095212,0.0266499171290469,0.0719546375235833,-0.824636473564132  
"B3galt6",305.352922384614,-0.292972683639335,0.125683333566384,-2.331  
03845455046,0.019751332066761,0.0568850033438265,-0.839871687069027

"Muc15",1.6272668168544,-4.1649953364431,1.83366943625887,-2.271399225  
0101,0.0231228212904444,0.0643885703400579,-11.4238289302004  
"Ecpas",4394.28500894464,-0.039794251694398,0.170459499735208,-0.23345  
2824607689,0.815409798010199,0.882387625796584,-0.00497920936268175  
"Olfr1441",0.384917032975341,1.04823512401209,3.72985545538505,0.28103  
9074181461,0.778680430200186,NA,NA  
"Fam131a",277.916343219309,-0.642944540217386,0.193925336880959,-3.315  
42309302294,0.000915045156075051,0.00550166254942486,-3.34505074241968  
"Slc29a4",16.8308396067259,-0.428290571926704,0.364598634857522,-1.174  
69055278847,0.240118540324488,0.37845212992053,-0.416155252906325  
"Sstr5",0.155668627108197,-1.28611468659492,4.77305157651793,-0.269453  
339436399,0.787580844435911,NA,NA  
"Vwc2",11.3010024300715,-2.26964420501419,0.945464485790293,-2.4005599  
7779446,0.016370007817272,0.0493537945526118,-6.82877072489377  
"Cdh20",4.36029030217178,-1.816854679563,0.901984435747938,-2.01428606  
476612,0.0439795081758975,0.105462114181976,-4.08683927127658  
"1700020N01Rik",5.42657158205183,2.68894053221586,0.89382542669912,3.0  
0835090599969,0.00262669651371262,0.0122671445806871,11.8335722136557  
"Zfp623",762.449877997333,0.311795534744307,0.123770751653931,2.519137  
4422295,0.0117642725544627,0.0384622787809818,1.01585395084303  
"Tmem125",450.927164630319,0.75108326806911,0.325725522259316,2.305877  
8534129,0.0211174584345458,0.0599953671217797,2.11316371242582  
"Zfp940",265.318915750093,-0.0893442669542571,0.237115282351919,-0.376  
796746578549,0.706324658709004,0.804951674294708,-0.0193852967875044  
"Atp5k",4104.7638101795,0.479775489857468,0.411031839930366,1.16724653  
238238,0.243110824160321,0.381964129692018,0.461749641558095  
"Phospho1",940.075117876298,-2.92041150086343,0.726590044967835,-4.019  
33871939123,5.83617164226332e-05,0.000652486666747994,-21.420400214542  
9  
"Clrn3",1442.57520574316,1.64732194868063,0.59255397883275,2.780036937  
6063,0.005435271564582,0.0211699810160247,6.35070795342368  
"Minar2",72.7804390985189,-0.55523461460111,0.468812663658983,-1.18434  
218535741,0.236277636105048,0.374395883687625,-0.545485543646494  
"Spata31d1a",136.239574929236,0.298698958306082,0.364236734577345,0.82  
0068186292872,0.412177237113094,0.555668379259567,0.175510610090043  
"Pdik1l",748.967869098044,0.0783431122421698,0.10525041347765,0.744349  
686177773,0.456664949371181,0.596666433213113,0.0404561528392534  
"Tatdn1",654.989652121255,0.114841771264391,0.187827975471513,0.611419  
949430319,0.540921598937767,0.671434258727309,0.0457459758387768  
"Rtn4rl2",84.3781378402676,-2.16577897032563,0.307453486237725,-7.0442  
4918652909,1.86464190408136e-12,1.15857520300001e-09,-44.5632302237418  
"Gm7327",0.149584872585184,0.86399405532736,4.78471990596623,0.1805735  
90995372,0.856702286420036,NA,NA  
"Tvp23a",111.098101389531,-1.39110913474157,0.329706802853925,-4.21923  
091273883,2.45137105478202e-05,0.000336452107768327,-11.1247759048779  
"Cdr2l",498.228889990381,-0.767344068042921,0.309854554956094,-2.47646  
534727124,0.0132690505182252,0.0421093663744067,-2.43055088969642  
"Tmem123",5743.71014592602,-1.25462497069126,0.270882793386302,-4.6316  
15596573,3.62823328665128e-06,7.76545473360337e-05,-11.8728177698748  
"Ankrd37",78.9819240279001,0.619536590165696,0.360322011303259,1.71939

701359036,0.08554210566082,0.175015737269115,1.07977754930129  
"Fgf4",0.419745230551339,-0.353375681421089,3.18277239654227,-0.111027  
631697759,0.911594435263831,NA,NA  
"Zfp366",538.506500069839,-1.04234299742288,0.280210849040176,-3.71985  
239327201,0.000199339242856194,0.00169215836846123,-6.65197286554512  
"P2ry10",226.569070399736,-1.46697362191396,0.41171812833291,-3.563053  
26620884,0.00036656626225954,0.00270628889872643,-8.6730076963092  
"Dcaf12l2",3.40068643028362,-1.12884662320361,1.0703191002458,-1.05468  
231198002,0.291570644068379,0.435335356309461,-0.938792437601515  
"Map10",223.173982944761,0.180735113181994,0.208392792696894,0.8672810  
16982543,0.385788055146561,0.530107436237116,0.114708163344973  
"Sgms2",2962.7942332294,1.16616153856112,0.343399920261568,3.395928390  
64394,0.000683962509429774,0.00438536698745865,6.33165304201931  
"Efcab5",70.0282291266286,0.180201679757477,0.685764976426198,0.262774  
69096859,0.792724243862042,0.866852053820893,0.0257484698940516  
"Zfp438",215.737666738508,-0.527658631452492,0.225434869810283,-2.3406  
2561792924,0.019251460900963,0.055816354594346,-1.52265837054557  
"Amigo1",1063.96531128478,0.441567400011551,0.188424986071049,2.343465  
21243764,0.0191055438475316,0.0554948666150903,1.27677657450075  
"Gja1",1297.60395708294,-2.78240063166143,0.623640519320979,-4.4615456  
2678337,8.13706161411169e-06,0.000144627554559662,-24.6001742334189  
"Zfp169",241.739647658543,0.0735789703762182,0.262457488223748,0.28034  
6241496799,0.779211876936366,0.857300145384565,0.0113287475851334  
"Insl6",100.011902468676,0.0489154011465225,0.338947938927149,0.144315  
381593266,0.885251432697115,0.928340366521182,0.00363719461611818  
"Kcns2",0.220934797106264,0.4.78471990595636,0,1,NA,NA  
"Prkca",969.326946253242,-0.290400596966495,0.209382363100663,-1.38693  
91512545,0.16546031817212,0.288210075577978,-0.361277403261193  
"Lin28a",2.20946842269266,0.3.74607156181331,0,1,1,0  
"Creg2",57.5259532660938,-0.85386366538906,0.591870351772349,-1.442653  
21422534,0.149118184910261,0.26682754141047,-1.12808432247579  
"Gdpdp1",151.653456996611,-0.0754262053551585,0.185806531835727,-0.405  
939471610413,0.684787074888842,0.788331958799235,-0.0179390677553071  
"Gm9847",0.136471251534351,1.35377179245804,4.78471990596487,0.2829364  
76756009,0.777225532132816,NA,NA  
"Apol10a",1.02316286485731,-2.8637795448797,1.71820805848602,-1.666724  
54522364,0.0955691899145298,NA,NA  
"Selenon",1297.07139565888,-1.18716096226742,0.195868884221503,-6.0609  
9823862217,1.35279314126896e-09,2.0289815898817e-07,-18.2948172136993  
"Adgb",75.9594780848506,-0.869634686567724,0.433538210658524,-2.005900  
89913134,0.0448668223156615,0.106945391382734,-1.94401349892609  
"Fam160a1",458.651768937182,0.0489075525151726,0.125704591326799,0.389  
067352265803,0.697226323641298,0.797943472534031,0.01103929148573  
"Olfr161",15.1288050568625,0.366228975047587,0.533087349387249,0.68699  
6184525001,0.492085132801614,0.628582017778162,0.170035997362962  
"Gatd1",1651.24586209792,0.117622135436559,0.11054629455483,1.06400794  
264723,0.287325101454064,0.431341609805307,0.0989031494786801  
"Hs3st1",275.824116636471,-0.965115352918794,0.219590664690338,-4.3950  
6549278759,1.107393612065e-05,0.000185476569356248,-8.29283280424321  
"Serpinb1b",4.89249570344728,-1.91734473634463,1.20686910168461,-1.588

69320100109,0.112129674679226,0.21497585023555,-2.94739904692826  
"Zfp11",196.820422992873,-0.0576677353214194,0.167796404005911,-0.3436  
76824679675,0.731089341924161,0.823832860708391,-0.0111752925209346  
"Zfp455",125.998401272214,-0.67994910177597,0.237322433523848,-2.86508  
56629095,0.00416896448162447,0.0172986740716565,-2.75863878761857  
"Olflml1",473.603375684844,-1.18462130723192,0.240170416686021,-4.93241  
975251513,8.12171500516831e-07,2.34603258030773e-05,-12.628299854694  
"Gprc5c",6458.80115860871,0.811673259708474,0.386972572396585,2.097495  
57877357,0.0359497281425022,0.0903166859067784,1.95161401356168  
"P4ha3",11.1074549491392,-2.29137351845996,0.956914442502063,-2.394543  
77182213,0.0166410570336132,0.0499534670756096,-6.86647507915546  
"Olfr523",2.05958051539412,-0.636149953000343,1.38592868549918,-0.4590  
06267534764,0.64622966530203,0.758773094909008,-0.175610784245917  
"1700014D04Rik",3.1241187262423,-0.85084997042129,0.957241906961922,-0  
.8888557471556,0.374080610961745,0.519244233824454,-0.557630837335388  
"Gja10",0.106914658212752,0.4.78471990596623,0,1,NA,NA  
"Fbll1",0.184548909977211,-1.07262530427466,4.7810839159584,-0.2243477  
25982058,0.822486742541638,NA,NA  
"Mb21d2",772.54485682134,0.752797792119368,0.243936192255417,3.0860438  
7548666,0.00202838888958608,0.0100968921544931,3.45950303840338  
"Lingo3",0.59290642006993,1.57695929340502,2.54579044728082,0.61943798  
0486328,0.535627867011411,NA,NA  
"Vtcn1",163.566277157026,-1.35256402873279,0.453932629191252,-2.979658  
08525945,0.00288570286294657,0.0131277261833253,-5.86069886717012  
"Rgs13",1.91089304138964,-2.65382302419107,1.85346878239276,-1.4318142  
5519618,0.152196986480009,0.271087328878471,-3.46407304556146  
"Olfr986",2502.3865974307,0.551163932857208,0.35025595653532,1.5736033  
1087368,0.115579187352368,0.219945636833542,0.834668808324611  
"Mblac2",629.175785582481,0.0198512454936167,0.243945557523913,0.08137  
57204480787,0.935143157337184,0.959603246237589,0.000818573355922478  
"Sv2c",27.8265540605411,0.494978743053591,0.464067577145167,1.06660919  
105485,0.286148348395278,0.430237546037255,0.417473877654555  
"Fam71e1",199.018930612106,0.392332633835905,0.206953986806966,1.89574  
813169388,0.0579933574615279,0.130271253892266,0.79962743526223  
"Gm8121",1.31160477654669,-0.235505281274959,1.19084798891097,-0.19776  
267287509,0.843230752055585,NA,NA  
"Olfr77",39.8687502488462,0.657062966963372,0.663580237788614,0.990178  
624295743,0.322086818632735,0.467196011731964,0.500029112573528  
"Gimap9",798.040624031879,0.159686923842248,0.196084380514664,0.814378  
602839842,0.415428092636432,0.558698920556294,0.0929608731527303  
"Gm6293",0.370320733343718,1.1445336344595,4.75821995606906,0.24053819  
3910027,0.809913057765823,NA,NA  
"Ghsr",0.229540625669495,1.39212599735259,4.78471990595879,0.290952453  
793349,0.771087683426917,NA,NA  
"Camk2n2",133.372464872752,0.123517690231554,0.239431171709692,0.51587  
973842152,0.605938406200451,0.7267384538412,0.0394254419622328  
"Nat2",635.610101960999,1.28155302874289,0.217623167093357,5.888863055  
61911,3.88861497322544e-09,3.99053761831314e-07,18.8826197892856  
"Adnp",343.431578902022,-0.998490474375374,0.804044665598718,-1.241834  
58593294,0.214297599107057,0.349003000606815,-1.05108571956616



"Commd3",3316.73867484562,0.210720519571229,0.147735870522613,1.426332  
81156302,0.153772297732285,0.273239065085582,0.273390523828241  
"Cited1",7.57108669169586,0.102729615478601,0.600028287972345,0.171207  
953921225,0.864060253513311,0.914429375977124,0.00918968197054464  
"Olfr853",34.0203351966269,0.659176407861619,0.431429776541015,1.52788  
806824267,0.126540331160913,0.235571111608674,0.952999315533141  
"Em15",1813.42463437672,1.32821083252696,0.28552382908185,4.6518388212  
9224,3.28988180943425e-06,7.11943568483341e-05,12.6845422876617  
"Rpusd3",480.19341903275,0.792861277115364,0.267631614963348,2.9625097  
8130497,0.00305142114217128,0.0136994265323637,3.40169305879334  
"Plcb1",1102.60664508994,0.592788482420567,0.226944533662342,2.6120412  
4573692,0.00900033949023059,0.0311868881074313,2.0556467209227  
"Olfr655",23.8069601466629,1.78527259300846,0.441126969284303,4.047071  
97092242,5.18622989894171e-05,0.000593949890816522,13.2622823638174  
"Zfp524",586.265484124374,-0.0635223123106866,0.230183127171136,-0.275  
964242433197,0.782575530547084,0.859449008370341,-0.00962132972775544  
"Fam174a",1400.74565722506,-0.0544293223669143,0.289666979096754,-0.18  
7903096640967,0.850952615210222,0.90524528414827,-0.00541840310721194  
"Olfr1356",196.062705104146,0.487049226285557,0.25015828053667,1.94696  
423896375,0.0515390221451385,0.119050806040269,1.03654056719745  
"Gpr183",133.431411382479,-1.19515799180131,0.473234567819099,-2.52550  
864428436,0.0115530939196883,0.0379357065082658,-3.9103925984396  
"Ercc6l",241.528569593978,0.904668419022641,0.224056394842406,4.037681  
76158933,5.39820158201412e-05,0.00061301184884165,6.69194654875052  
"Bzw1",7661.19723076546,-0.208419728907622,0.142848047866089,-1.459030  
99147006,0.144556577961699,0.260640295644276,-0.280244085329504  
"Tceanc",220.799228212596,-0.0343887755191242,0.184564753452433,-0.186  
323633715834,0.852190974945455,0.905998889284977,-0.00339476359266592  
"Fam83a",103.881621088263,-2.1409328471032,0.995027710625765,-2.151631  
380956,0.031426398511657,0.0814438754639531,-5.36911947317166  
"Nyx",18.2090722475674,0.278438168076739,0.379506486910771,0.733684871  
484701,0.463140820940492,0.602262220001181,0.141185511031126  
"Tmem199",1004.34632186549,0.0502255606455221,0.170976806850112,0.2937  
56571846337,0.768943922268376,0.850514442726844,0.00813221569241565  
"Rnf7",3582.96496272035,0.0266505920754795,0.238021585959804,0.1119671  
22511234,0.910849475045165,0.945169934243248,0.00150284135997669  
"Gen1",220.106868331997,0.499155542636591,0.221639168958723,2.25210888  
933423,0.0243153916893569,0.066906789043054,1.34994362146557  
"Msrb3",1509.61708009652,-1.65790108964947,0.271568330149697,-6.104913  
22289158,1.02856549352828e-09,1.59166428514401e-07,-25.9516487609763  
"Swsap1",566.179380593874,-0.0498588410072829,0.245949847094628,-0.202  
719544639928,0.839354245937184,0.897124821651609,-0.00541268934294365  
"Pcdhb9",105.976736808159,-1.34976684318859,0.434544274875157,-3.10616  
64397175,0.0018953000347577,0.00958116673002478,-6.27365677094271  
"Islr2",209.284662452905,-0.621871248091145,0.432609479917203,-1.43748  
872126003,0.15057917532936,0.26888842939572,-0.816802229708649  
"Msantd1",185.141443639882,0.198262527076533,0.289137506887687,0.68570  
3246218923,0.49290025929554,0.62929342952753,0.0918268020448075  
"Nhlh1",0.690414035312809,0.960478307395341,2.43237125495523,0.3948732  
35505745,0.692936443222483,NA,NA

"Gm6563",0.605816608983402,0.0579936247068956,2.72190975225569,0.021306226137305,0.983001377228204,NA,NA  
"Jagn1",1347.43706762281,0.104543213800949,0.217319150008777,0.481058451575606,0.630474956399448,0.74611560450816,0.0306180649879388  
"Trap1a",1.71956964669503,0.3541008385878,1.52261455835158,0.232561048786476,0.816102276571538,0.882553161880229,0.0442400315671464  
"Nat8f3",1206.91186147117,2.33693442016288,0.589793823343944,3.96229042703975,7.42341607745128e-05,0.000781965244074258,16.7177283768913  
"Actrt2",0.257801208733911,1.8316319500156,4.71555462250302,0.388423440431567,0.697702700354001,NA,NA  
"Zgrf1",136.605349135013,-0.0170288318820715,0.248868193902868,-0.068425103324846,0.945447239093675,0.966413120201755,-0.000581770892772861  
"Gdf6",13.2825377693245,-0.984978107923637,0.605889920373137,-1.62567171825047,0.104019509529421,0.203305172093489,-1.5691165360967  
"Pcmdt1",5342.72868399436,0.00116706760458013,0.20426907108873,0.00571338381459221,0.995441404065264,0.996975369656078,3.53529727319872e-06  
"Usp42",1331.27010470784,0.0183535705605428,0.310178007067489,0.0591710893175911,0.952815836665001,0.970485461176106,0.000549852000294861  
"Ffar2",181.769123640075,-2.52798421475733,0.691493624134815,-3.65583156015401,0.000256349642387714,0.00204597025267116,-15.6529828648944  
"Taf7",365.352252835892,-0.385148270451072,0.153744016143764,-2.50512689931897,0.0122407466949704,0.0395586539246189,-1.24401766683421  
"Mtl n",1470.60577438432,0.246878156674957,0.32973540896355,0.748715940004635,0.454028434108932,0.594303900340825,0.128466622069971  
"Pcdh19",339.047173890742,-1.28517590198008,0.321095080312383,-4.00247771074467,6.26825746951412e-05,0.000688559157271561,-9.35724920452428  
"Nup160",677.364314683379,-0.0504884772137809,0.234475289489974,-0.215325364662529,0.829513655272802,0.891135547087361,-0.00581923796097113  
"Cacna1c",500.912692154045,-1.08657529335873,0.303467981346997,-3.58052697531967,0.000342901938595807,0.00257150076874656,-6.47953706195997  
"Gfod1",274.3693280885,-2.3803269761717,0.468289815426234,-5.08302102193946,3.7147856956945e-07,1.26335078408115e-05,-26.8480838687676  
"2900026A02Rik",1946.18914297555,-0.468633286068509,0.224868816856713,-2.08402966947223,0.0371574685694303,0.0926261725377362,-1.11496459885561  
"Olfr645",3.03959643369774,0.881525993836499,0.90312001637735,0.976089531679887,0.329020098507947,0.473833656895484,0.658410842454731  
"Zfp52",379.716572343746,-0.208078855726045,0.195071092050524,-1.06668216976071,0.28611538130361,0.430221154057052,-0.175505336602008  
"Rab11fip5",4415.81381331267,0.132130037047136,0.150299858762069,0.879109522360253,0.37934189516751,0.524196192202418,0.0853413708130725  
"Plekhn3",741.593158049127,-0.497871621537488,0.184993527066844,-2.69129211941341,0.00711758411625993,0.026100931935083,-1.81513252078722  
"Spryd4",518.546103962273,0.344416915723971,0.251087031455683,1.37170332425058,0.17015581314286,0.294617451775549,0.420904176352564  
"Zfp46",806.965968702137,-0.670359841515763,0.152777087226757,-4.38782970459956,1.14487360578438e-05,0.000189494617453548,-5.74575471390089  
"Samd3",52.0351153536803,-0.994758635955824,0.396352841763201,-2.50978050650672,0.0120806225661927,0.0391470797400074,-3.22344518048648  
"Commd1",2025.04855653314,0.729172266249842,0.196010541756043,3.720066

58273196,0.000199170263660503,0.00169212278904248,4.65341075093983  
"Ncald",802.875885746054,-0.272447881069476,0.25064323234248,-1.086994  
76352588,0.277039123920338,0.420562818296384,-0.235983843869786  
"6030498E09Rik",0.294579729475019,0,4.78471990595405,0,1,NA,NA  
"Six1",233.754252146664,-5.14323852152164,1.37427451649632,-3.74251174  
69501,0.000182190013138551,0.0015746191827019,-33.1931335607568  
"Plpp7",100.844326027142,-0.263896135870241,0.205996542099611,-1.28107  
070720941,0.200168831680415,0.331652946983747,-0.291253244738384  
"Pcdh1",2762.09381549857,0.0244352638032366,0.139427952506372,0.175253  
694571179,0.860880294960754,0.911855931722337,0.00225472171860419  
"Kif18b",52.6908596753952,-1.11938776483044,0.485349783298476,-2.30635  
266224493,0.0210909347746516,0.059939380627848,-3.15042904853625  
"Flrt3",332.765672534816,-0.67239085572207,0.343859463291488,-1.955423  
44330389,0.0505331113108678,0.117355835041552,-1.44062742022527  
"Zbtb22",1022.34531837092,-0.225610858983948,0.171422550496508,-1.3161  
0956860978,0.188137269831141,0.317134995000223,-0.259097769808955  
"Ywhag",7055.55554982134,-1.33294038867968,0.425085020420601,-3.135703  
03503238,0.00171442709417719,0.00891229260464894,-6.291910192251  
"Gm45902",122.331540462826,-0.133210118225347,0.180104646275442,-0.739  
626217202764,0.459526829084285,0.599201104359352,-0.0682246282261982  
"Tacstd2",2958.09322579848,-0.403870536150741,0.332644334881936,-1.214  
1211913141,0.224701448895175,0.360891997574805,-0.411615376088049  
"Kctd16",2.71005152211695,1.20830939684059,1.30048007832113,0.92912564  
9045291,0.352823973446758,0.497855104520544,0.842730796128315  
"Ppp1r37",5055.84331870248,0.429533256979886,0.16182421908623,2.654319  
97389096,0.00794684311570332,0.0283423352972349,1.53059822601113  
"Vamp7",1161.99996229679,0.252547624883179,0.145370641126773,1.7372670  
5011186,0.082340044696893,0.170016540453248,0.447478920949048  
"Plagl2",845.646088681984,-0.481673150860905,0.164104651177972,-2.9351  
584333739,0.00333377420929058,0.0146466718190058,-2.03436685466332  
"Ccadc157",1543.66071862544,0.121784245278137,0.165972062693278,0.73376  
3522016342,0.463092876280073,0.602240038798697,0.0617566906253261  
"Gpr87",32.4047538377936,-3.53265571315898,1.03453494452882,-3.4147282  
6204814,0.000638456723163802,0.00416342113319325,-19.3639631611126  
"Fhad1",73.5429003431104,-1.14331305176021,0.483767000038911,-2.363354  
77961136,0.0181103229104898,0.0532441308969737,-3.35318591862576  
"Cd14",1508.71727316583,-1.16881281850702,0.307135978721599,-3.8055223  
0765019,0.000141505259163079,0.00130267683813112,-7.76481396641034  
"Bbs12",347.315585918279,-0.129839495464407,0.213971332516096,-0.60680  
7902430758,0.543978403151356,0.674241364480652,-0.0511784605915203  
"Crebzf",3098.75288786894,0.0683308849190171,0.152454043354344,0.44820  
6445795589,0.654004211211507,0.764383195397004,0.0183595556234861  
"Meioc",0.696995324810861,1.68743930216159,3.00491796123226,0.56155919  
1941998,0.574416390603891,NA,NA  
"Hspb3",0.260121955815912,0.890114603675218,4.78471990596089,0.1860327  
50332218,0.852419078549083,NA,NA  
"Spn",784.206712630936,-1.14130770836792,0.4206270741409,-2.7133481854  
4184,0.00666070801827279,0.0247986413863439,-4.21937626144787  
"Zfp24",2267.79244265341,0.35163578629358,0.169380340727599,2.07601298  
228044,0.0378927503084118,0.0940469508036423,0.83125333591028

"Cbr1",2440.72982025797,-0.138596254466362,0.281611673981021,-0.492153  
796421461,0.622610624320969,0.740499506463554,-0.0416385159388344  
"Pcdhb11",34.1796951891886,-1.75301655922045,0.38415073160901,-4.56335  
603443461,5.03423349235384e-06,9.98550199734641e-05,-16.1484225561372  
"Foxd4",0.184223986600386,0,4.78471990595808,0,1,NA,NA  
"Irf2bp2",4974.65460560981,-0.19254120904124,0.143056236769793,-1.3459  
127220792,0.178330665443482,0.305302600300028,-0.228440875994361  
"Kcnj16",10187.5343343871,1.57163744123464,0.58717960309915,2.67658725  
360945,0.00743761968526781,0.0269802248601585,5.67777772130571  
"Tlr6",99.5298686476035,-1.09201751916268,0.420234366786427,-2.5985916  
561595,0.00936070514878418,0.0321555724085613,-3.75344933000151  
"Zfp786",42.2232933514284,0.31946801365669,0.280692558936642,1.1381420  
828074,0.255061158222926,0.395796455473984,0.296100590074719  
"Ufsp1",394.170178859455,0.995944149856964,0.272627980344352,3.6531252  
1700451,0.000259067815168778,0.00206175684088197,6.15911464868428  
"Gm6583",0.954584338544839,-2.41145836854548,1.85897114068075,-1.29720  
054054331,0.194562194800027,NA,NA  
"Siglech",46.1017255712083,-1.35524856236334,0.444836182484155,-3.0466  
2393871617,0.00231427048893668,0.0111802888982377,-6.08994896622458  
"Wdfy4",1281.32186518636,-1.31400192926658,0.433287552727878,-3.032632  
53466187,0.00242430613477313,0.0115597306871762,-5.86074781980607  
"Olfr414",21.8978962932703,0.647211918562188,0.335418063947857,1.92956  
78680645,0.0536604033289016,0.122643364682561,1.35815777797359  
"Mafg",8639.8110017699,0.30562576389144,0.174809283009654,1.7483382954  
8149,0.0804054657308615,0.166923527557532,0.547137199243873  
"Fam181b",101.953267215893,-0.747802353237499,0.390443886818227,-1.915  
2620350428,0.0554590946717857,0.125781252519539,-1.55035204354319  
"Arhgef39",878.834805937863,1.10368779041495,0.461481635537329,2.39161  
800908906,0.0167742904696976,0.0502266721768623,3.30136093478816  
"Rps19bp1",1028.96740402048,0.231014596947067,0.144047985375938,1.6037  
3361935026,0.108772782009413,0.210026906676523,0.360502813223338  
"Usp29",27.8042121957028,-0.148721768349667,0.438346863801111,-0.33927  
8732508841,0.734399762515177,0.826236908055152,-0.0283870790970503  
"Gm5124",18.2106655351012,-1.01260843238664,0.387294691522425,-2.61456  
832368696,0.00893402899370057,0.0310122302508766,-3.51716742462257  
"Gm6365",0.849253894467468,-1.90787514749331,2.12379938589145,-0.89833  
1151316577,0.369009029608871,NA,NA  
"Zfp579",2944.22800286879,0.407927787653799,0.245688175735328,1.660347  
65992665,0.0968445330136745,0.19256319648181,0.67199204374504  
"Pusl1",402.559099730729,-0.157747365492786,0.161294726824454,-0.97800  
6960292455,0.328070881629627,0.472711058972397,-0.118195517791792  
"Tceal8",2053.35665102109,-0.0220823939661257,0.213017469030373,-0.103  
664709127575,0.917435433754401,0.949331351328659,-0.00114822669454623  
"Mical3",3321.63115705006,-0.232483358841984,0.235767980255244,-0.9860  
68416034677,0.324099541134734,0.468999024272306,-0.17602584247386  
"Map3k19",7.63307963548762,-1.74026538895089,1.10982579230025,-1.56805  
275298565,0.116868821564013,0.222078365478114,-2.61862077082346  
"Ccnb3",0.160750197886176,0,4.78471990596389,0,1,NA,NA  
"Otop1",464.194689562339,-3.72829646503735,1.80250392795077,-2.0683985  
2453247,0.0386025638494686,0.095407883120413,-8.75998327161403

"Pcdhb2",2.29187137379546,-1.52610474824367,1.85188218386104,-0.824083  
06616021,0.4098923612683,0.553513680875572,-0.902643359546703  
"Rap2a",1122.98249570697,-0.652437927452257,0.163873651780373,-3.98134  
733902597,6.85257267123516e-05,0.000740229706059519,-4.70313142607271  
"Krt9",0.29701819758227,-2.19685673226412,4.74443328935594,-0.46303880  
7436229,0.643336550668347,NA,NA  
"H1f4",64.4264160581881,-1.29991385636201,0.564672632877937,-2.3020663  
3131272,0.0213314317779552,0.0604711045080794,-3.64702484761888  
"Gm5812",1.36441025621702,-0.367976392298677,1.87447082394576,-0.19630  
9479773116,0.84436794196738,0.900332830169527,-0.0386341257707802  
"Kctd19",2.23623940147553,1.23882890366761,1.68810195946016,0.73385905  
2011157,0.463034645771207,0.602204477271011,0.628282271709245  
"B3gnt2",682.553706168797,-0.794838692525365,0.2771544808029,-2.867854  
38295194,0.00413265691487004,0.0171986715608152,-3.22936851085033  
"Lrrc3",566.535279820169,0.61131000042507,0.307210385786811,1.98987413  
416839,0.046604802340651,0.110185574880322,1.34829878998105  
"Pcdhb1",0.778227257102852,-1.00963258338768,2.98873359909971,-0.33781  
2839421957,0.735504233657129,NA,NA  
"AU021092",722.929264836032,0.163754319980885,0.406747654643551,0.4025  
94380352087,0.687246644448329,0.79005030153336,0.0385901240614921  
"Coa6",1464.79519860154,1.16883638360312,0.252606724169797,4.627099248  
62277,3.70822837106011e-06,7.87922476044029e-05,11.0439795999835  
"Dcun1d4",1220.89066597065,0.576610697597447,0.151956552819997,3.79457  
606070125,0.000147895939797738,0.00134983830384445,3.81011113948368  
"Trim32",856.887886052962,-0.190249883947213,0.143560871097045,-1.3252  
2101944204,0.185097855727641,0.313420581066222,-0.220729681052347  
"Pcdhb6",13.2905035593319,-2.00729922383882,0.603107121873003,-3.32826  
317421849,0.000873892701396164,0.00531230678977397,-10.5136895859663  
"Trem14",61.8999862087296,-1.53251894061375,0.511441395966618,-2.99647  
02753818,0.00273124864152025,0.0126134263411563,-6.70169528888101  
"Vmn1r73",2.69617630464225,-0.582135262188014,1.43966649019607,-0.4043  
54248815454,0.685952238519623,0.789160770985108,-0.137841022277011  
"Pcbp1",7620.55003988991,-0.0328839132275038,0.164858491922153,-0.1994  
6751207109,0.841897054306875,0.898877930395107,-0.00350568945434474  
"Tmem198",123.670671478878,0.0886208908717025,0.255502548326002,0.3468  
49342412934,0.72870450561188,0.821857962194611,0.0173863282416569  
"Senp8",493.057881436901,0.251008029192089,0.202140068682476,1.2417529  
6282488,0.21432772229285,0.349003000606815,0.264229816659289  
"Olfr1325",0.148895757179753,1.67550258368843,4.75885183143336,0.35208  
1267296733,0.724777316609313,NA,NA  
"Apon",10.4463265709347,-0.168731742866894,0.581661658628719,-0.290085  
723141324,0.771750657716278,0.852431822854301,-0.0269400553273705  
"Wdcp",524.698201756778,0.178368834674208,0.180087011251156,0.99045918  
6562036,0.321949728506726,0.467132656324739,0.135764011739658  
"Rpl31-  
ps13",0.545279851113254,1.34838490166943,2.32183392221338,0.5807413220  
94231,0.561414807417377,NA,NA  
"Kcnf1",162.560844121092,-0.185941746136785,0.507593269633645,-0.36632  
0353835637,0.714126043405987,0.810431848805653,-0.0390827287042835  
"Kctd14",197.629978730102,-0.402219281552517,0.264946499455963,-1.5181

1510013693,0.128985385148955,0.238774052558455,-0.576073562796046  
"Fam243",150.235599282142,0.858542348720989,0.481028516683688,1.784805  
5134859,0.0742928687415729,0.157138117831084,1.58884433753332  
"Mettl5",589.425346821161,0.364838580865787,0.149944985879695,2.433149  
58966688,0.0149681155753457,0.0461128641946739,1.12248547878862  
"Pabpc2",1.01292798083963,0.417343501910652,1.44208891587023,0.2894020  
59275108,0.772273719317475,NA,NA  
"Rinl",797.920726056113,-0.966498922212853,0.343672629548836,-2.812266  
20659797,0.00491937710714136,0.0196271771710747,-3.79915270343025  
"Fam229b",233.259237480732,0.768110397153298,0.142600556142745,5.38644  
74159863,7.18639410689802e-08,3.53839172465398e-06,9.64119746253586  
"Ttn",131.832212543175,-0.426297806542103,0.918391963013923,-0.4641785  
02981564,0.642519861512308,0.755828190634509,-0.119338315128097  
"Wfdc21",11.7618322029955,-3.27283208450508,1.2438694908804,-2.6311699  
969332,0.00850914608755048,0.0298187150278683,-11.4962123652001  
"Xrcc1",1469.04850822852,0.133150167510369,0.144815677295362,0.9194458  
08610897,0.357862438291443,0.502990600604612,0.0914986375115609  
"Wfdc15a",0.271349370025343,0.930789325864542,3.93187458944235,0.23672  
9149084217,0.812866919918775,NA,NA  
"Tubgcp6",1310.7530574149,0.053951691548378,0.181927743748005,0.296555  
60189384,0.766805811250906,0.849450582794737,0.00880305535693392  
"Nlgn2",2904.97958575551,-1.0818541523056,0.333072796217944,-3.2481012  
096758,0.00116177937825224,0.00659074027266867,-5.43316849139221  
"Adam6b",2.98956755391768,-3.29400118072891,1.75747358593695,-1.874282  
04161191,0.0608915614009249,0.135095543015473,-6.5938427073187  
"Cox6b2",1015.97559324482,-0.203555661668856,0.296629710483647,-0.6862  
28164188151,0.492569240165558,0.628953179092865,-0.0943884472689276  
"Sox12",923.055716939287,0.289293867326025,0.312900390906384,0.9245557  
87508038,0.355197019946064,0.500334597233662,0.200329699381956  
"Gypa",8.35888966062917,0.5781483457417,0.517469563200356,1.1172605827  
5982,0.263882923875466,0.405772022848883,0.521468877251863  
"Rtl8c",249.454115469132,-1.3439741562744,0.296833437451585,-4.5277047  
2158688,5.96278230976563e-06,0.000113537431128721,-12.2078252644945  
"Arf3",7093.89235288361,-0.0642653813161905,0.203882370663451,-0.31520  
8132547535,0.752603631198226,0.839200823579036,-0.0112660581284002  
"Mest",169.214359112515,-0.79696477226205,0.369061617104995,-2.1594355  
3955468,0.0308163931933065,0.0802964097932769,-2.00996935862883  
"Samd7",1.81338271209643,1.70582281746406,1.17847612283627,1.447481866  
12268,0.147762011689686,0.264901039345852,2.26601325525009  
"Tbc1d22a",1108.4903565104,-0.320909921934623,0.179194376320479,-1.790  
84817573009,0.0733176619539061,0.155656334143866,-0.596926050259244  
"Vmn2r72",4.40157144393808,0.365316719561525,0.726792159910254,0.50264  
2625653303,0.615215554664913,0.734431695638062,0.112758031067144  
"Olfr664",0.118377085491146,0.4.78471990596623,0,1,NA,NA  
"Klhdcl1",273.189773935674,0.491724330717485,0.34870736895581,1.4101346  
1284152,0.158499938601742,0.279500027390501,0.62682701087315  
"Abca16",0.10500178835157,-0.544048378937456,4.78471990596623,-0.11370  
5376621746,0.90947135024012,NA,NA  
"Cd209f",21.6075017733748,-1.77389380419905,1.34916087374999,-1.314812  
6652002,0.18857286984935,0.317704468704971,-2.03400636645499

"Sox6",1314.78391018213,0.605835027454877,0.257513500158212,2.35263404  
474974,0.0186409697127622,0.0544430238854758,1.76334376863503  
"Rspo2",0.161850200053757,-0.0629309216593589,4.78471990595378,-0.0131  
524776572714,0.98950614369312,NA,NA  
"Spats2",885.142109762456,0.230480961514398,0.228113231480625,1.010379  
62602346,0.312313445249484,0.457374760062674,0.180294234648313  
"B3glct",867.957703072804,-0.385584136575322,0.217879090542817,-1.7697  
1611004383,0.0767744448067897,0.160979473582405,-0.704261102776481  
"Xkr4",6.33242329200827,-1.92313535384149,0.790948057943427,-2.4314306  
5404561,0.0150393269233331,0.0462775473813993,-5.90998412748187  
"Rnf133",0.162648236660872,0.412909841717156,4.78471990596623,0.086297  
5994064531,0.931229846754807,NA,NA  
"Nanos2",2.22033337615366,0.0344051840242058,1.19055695638785,0.028898  
3940160167,0.97694562647783,0.985334462293851,0.000508306999228645  
"Tlr11",160.33096544643,-1.34658445874691,0.442790984088219,-3.0411289  
0085094,0.00235692904966667,0.0113218533161864,-6.03407256340991  
"Prdm9",520.397726288921,0.296848775777465,0.321033941085352,0.9246647  
71500104,0.355140309548501,0.500290857277413,0.205587260935499  
"Erich1",335.133170162835,0.185262663918429,0.144425182056066,1.282758  
73556808,0.199576615035342,0.331037417265768,0.204812296606365  
"Casr",354.20679871052,1.45483515126602,0.572596816433311,2.5407670973  
935,0.0110609572863661,0.0367029518668424,4.80808191969201  
"Sec31b",327.290346533946,0.0190974874565899,0.387957641993723,0.04922  
57024721757,0.960739428481159,0.976210192116611,0.000459816984730468  
"Igf1",31.4465022456819,0.995367564890536,0.695184137385498,1.4318041  
9598467,0.15219986610076,0.271087328878471,1.29926747960689  
"Smim11",1332.55383399794,0.249498080462726,0.155367464593892,1.605857  
96463164,0.108305121274519,0.209310462346176,0.390199195498308  
"Lax1",265.76914414347,-0.972355600293995,0.391993381162539,-2.4805408  
6375201,0.013118322630053,0.0417056994359651,-3.08928797679911  
"Gm9864",2446.07652354523,1.10347535337458,0.47114733588249,2.34210250  
028836,0.0191754478645845,0.0556373336999507,3.18783086826143  
"Olfr796",0.214228137860247,-0.920587860243252,4.78278000526876,-0.192  
479658112881,0.847366500467667,NA,NA  
"Btla",355.777982790905,-1.27554265810199,0.451304034810731,-2.8263488  
905809,0.00470819522286249,0.0189591884459671,-5.05812179042784  
"Slc6a7",30.3219318339492,0.98323507403295,0.383572465393204,2.5633619  
7913744,0.0103663907938944,0.0348669808003023,3.29994831037779  
"Tagap1",2024.76880869477,0.746280962821254,0.234134319858318,3.187405  
26067624,0.00143555478336494,0.00777512421279153,3.62455666795333  
"Pfdn4",763.899719111957,0.297229969115546,0.180864920080224,1.6433809  
7727137,0.100304133427202,0.197808232382279,0.481648455675043  
"Klf13",3947.00907629039,0.319023749188149,0.287437683860877,1.1098883  
9355719,0.267047122502493,0.409056861855104,0.285175682259344  
"Zfp217",1480.88222420962,-0.577875970331058,0.195713567562939,-2.9526  
6177775447,0.00315046939764249,0.0140214225782318,-2.46589438873308  
"Olfr901",0.25887104520169,2.12804998605385,4.7257511146108,0.45030936  
5525931,0.652487386879203,NA,NA  
"Pard3b",1800.67936609227,0.554440495359659,0.344588672589029,1.608992  
22598912,0.107618041510182,0.208230284148608,0.869978500682548

"Dock8",2808.14160334171,-0.463162313838353,0.105044642296899,-4.40919  
50213821,1.03755560165207e-05,0.000176068399660679,-4.00387054022262  
"Rgs14",259.429152256903,-0.880554503208027,0.408426362333371,-2.15596  
882183939,0.0310860997793082,0.0807940247263333,-2.21534504363813  
"Gnpda1",3936.23020823035,1.14526641315747,0.299000432716488,3.8303169  
0874978,0.000127978329006427,0.00120488723272203,7.69775850882664  
"Mtcl1",799.05936831837,0.290995407195234,0.380291046952003,0.76519131  
7354261,0.444157629169345,0.585424555772587,0.155804166884245  
"D630039A03Rik",599.048156434625,0.43788478066767,0.329256941855577,1.  
32991814295518,0.183545242981238,0.311684823867634,0.510469779957585  
"Akr1b7",293.159768622192,-0.0697502039915725,0.47844518429459,-0.1457  
8515215784,0.884090997529381,0.927895720325706,-0.00521982088458989  
"Sema5b",65.6648809498436,0.832933608656801,0.551075810541677,1.511468  
28208277,0.130669183810162,0.240971128906701,1.18532961865971  
"Foxo6",19.6641205431596,-0.840781922547407,0.462404621325138,-1.81828  
183320905,0.0690210679818003,0.148572839866322,-1.60310202298471  
"Rbm12b2",1309.85272457202,-0.107105279873564,0.137243071105223,-0.780  
405735685172,0.435152092858367,0.577183367792683,-0.0588645549776452  
"Babam2",2039.39370111448,0.180475699624816,0.175723461354589,1.027043  
84624338,0.304399818307566,0.449129843216643,0.144460555541926  
"Rasal3",1004.09328245443,-1.25803281643096,0.49033185542919,-2.565676  
29147773,0.010297487872929,0.0346531616407264,-4.22996716194442  
"Ppp4r2",4207.36783892517,-0.29176321138422,0.108045172403734,-2.70038  
174675667,0.00692599538908443,0.0255618130032876,-1.06979524811679  
"Rps10",15576.2912459937,-0.229749484743385,0.215100460988814,-1.06810  
317229089,0.285473975066994,0.429654308441239,-0.194086466463024  
"Plpp2",2219.59185159372,0.587187087273965,0.211326970837285,2.7785714  
4758906,0.00545985046331836,0.0212317838719149,2.26199496879968  
"Acvr2a",1207.0334939631,0.0640860979794974,0.105416280969507,0.607933  
58853207,0.543231521306769,0.673658220596539,0.0253160843087965  
"Plld4",2391.13276910336,-1.07810856738558,0.418536789319715,-2.5758991  
6799888,0.00999797973780245,0.0337676440200367,-3.65290373874818  
"Serpnb6c",13.4035760163242,-1.44255224021985,0.590531264791903,-2.44  
280417689348,0.0145736425947981,0.0452984237485801,-4.46395344590912  
"Cd177",5.85490119774815,-1.64822767896781,0.839311780809963,-1.963784  
75395307,0.0495550588802483,0.115563274494329,-3.55677160479206  
"Opa3",3612.19810122712,0.754080539614571,0.132899472069808,5.67406723  
194864,1.39446362210956e-08,1.02844968174828e-06,10.396853808497  
"Ppp1r36",91.4586364541588,-1.53290682026653,0.557036811562128,-2.7518  
9500666521,0.00592515141422223,0.0226171891688538,-5.8082530440615  
"Gpr17",47.3175409794127,1.19808885639783,0.542750511966832,2.20743938  
509826,0.0272833773614267,0.0732499619399642,3.1316575654534  
"Epx",0.243148865927251,-0.0565070046367328,4.78471990596301,-0.011809  
8876731134,0.990577291997576,NA,NA  
"A930035D04Rik",14.6005080125099,-1.11169401712545,0.604057063022768,-  
1.84037913829269,0.0657125940634993,0.142934422027009,-2.1626554576326  
4  
"Zfp622",1903.4774386153,0.551516564835428,0.150315791959054,3.6690527  
1660119,0.000243450879145281,0.0019671799592104,3.43658478944754  
"Fpr2",72.0873079033498,-1.2043608281053,0.709542687768094,-1.69737613



940282,0.0896255706645831,0.181485032383222,-2.05534062502647  
"Bhlha15",25.5130503179877,-0.814450564450074,0.648702196155032,-1.255  
50764168437,0.209294535777817,0.342926458705536,-0.871656970145416  
"Dnah3",13.3965891567416,1.28782253833573,0.815326299883553,1.57951796  
540803,0.114217299068778,0.218141727617107,1.96085186240783  
"Ostn",0.0934659659323483,1.37778842356407,4.78471990596623,0.28795592  
0229742,0.7733804806872,NA,NA  
"Taf9",98.7745903971191,0.544877634516236,0.392741470930772,1.38736974  
535669,0.165329045607073,0.288103112990142,0.678065797166099  
"Ppp6r1",4782.06828039425,-0.0408581411072327,0.121409399143459,-0.336  
531943947389,0.736469767040699,0.827704291313188,-0.0077262468829003  
"Cdc42se2",2011.42592498816,-0.516788370450222,0.197515956649052,-2.61  
643858662243,0.00888523463802235,0.0308648325266631,-1.79746119126142  
"Ltn1",1899.15925415411,-0.0143890475112018,0.110220403551212,-0.13054  
7947998721,0.896132921673395,0.936126424151506,-0.000949745384251349  
"Doc2a",58.6430063819009,-0.0960226591299645,0.598800544840295,-0.1603  
58336273015,0.872598807673474,0.92016936463047,-0.00798884843739019  
"Tbc1d30",192.913067716551,-0.77562496476847,0.30649361604866,-2.53063  
98703108,0.0113854680151667,0.0375243163217918,-2.54619535686719  
"Hbb-  
bs",11507.6213010999,-0.495302508937379,0.50556035546853,-0.9797099467  
54737,0.327229314791721,0.472048788280162,-0.37181018747183  
"Slc39a1",3818.85434720649,-0.5824976782192,0.153010448900009,-3.80691  
438007516,0.000140711432726398,0.00129720639021244,-3.8721779307908  
"Lrrc15",11.9893066815597,-4.09155783968871,1.38333243596468,-2.957754  
57389274,0.00309888745710656,0.0138551037924017,-17.5081917366157  
"Ankrd44",1548.76059911174,-0.595159258549237,0.190322276454001,-3.127  
11296668985,0.00176532082033787,0.00909144885233697,-2.79749907353803  
"1700024B05Rik",3.67397539426927,1.31662208193931,0.988903943799565,1.  
33139531922644,0.183058968778017,0.311184287117156,1.53698509243594  
"Cx3cr1",2588.39297155854,-1.28595237843739,0.493692124746883,-2.60476  
58327479,0.00919370704261891,0.0316991865458857,-4.43841867352009  
"Immt",10855.7481927353,0.563752458004941,0.267350158886229,2.10866700  
193302,0.0349733350317591,0.0883532115119512,1.36789614123374  
"Cemip",102.216714449632,-2.10749319117833,0.488323763803461,-4.315770  
28888265,1.59047307746487e-05,0.000241331082213307,-17.5540289853547  
"Zdhhc19",11.2817100786834,1.10806281422062,0.714393459921562,1.551053  
97289371,0.120888750106194,0.227892183077499,1.63869486342686  
"B630019K06Rik",157.047876229047,0.164872242111747,0.199686140717721,0.  
.825656910986187,0.408998741648269,0.552720922141527,0.097753093045476  
7  
"Tmem106c",1755.00365292392,-0.0883250275190507,0.176497006213953,-0.5  
0043357342833,0.616769818209365,0.735611568109017,-0.0271204699998712  
"Il1rapl1",3.40651076009376,-1.05758601451539,0.956880871189084,-1.105  
24313564881,0.269054250381577,0.411420263033486,-0.939284494887929  
"Mpp3",243.425012771512,0.108657506853084,0.312948515970434,0.34720569  
4572935,0.728436793003376,0.821698616718532,0.0213383347745433  
"Actn2",25.9829394762602,-0.459746779606058,0.601423394948005,-0.76443  
1153606527,0.4446103494225,0.585783674102297,-0.245874745155398  
"Rnase9",0.199266769027631,0.864206500620333,4.78471990595963,0.180617

991775008,0.856667432756454,NA,NA  
"Nrros",1343.70311976243,-1.19947939704668,0.281711999601022,-4.257821  
45860118,2.06428705485986e-05,0.000294652042427947,-9.75142614414018  
"Trpm3",278.258493695817,-0.425154537900629,0.262120207777553,-1.62198  
306458476,0.104806974341762,0.204304007648951,-0.675207547139409  
"Acot4",2985.12071451472,1.6963393140844,0.36464074845898,4.6520837872  
7103,3.28597503793846e-06,7.1188823655249e-05,16.2003368390029  
"Rft1",846.844348816807,-0.00862627931974875,0.15193383251402,-0.05677  
65531679901,0.954723191663728,0.972123494232565,-0.000243885886099403  
"Mogat2",365.081075561837,2.10447611906988,0.680675788317247,3.0917452  
261267,0.00198983550772892,0.00995581542974043,9.70078982126478  
"Ezr",15842.954214967,0.250385659729956,0.29046559240488,0.86201486949  
595,0.388679335378483,0.53286947554561,0.157612457415881  
"Rexo4",1608.78464469879,-0.0024809083242378,0.0893440216546335,-0.027  
7680395206291,0.97784715689601,0.985961086817372,-3.50760515777769e-05  
"Ccdc171",163.175271639237,0.338520158677949,0.232243996215809,1.45760  
563973152,0.144949274239959,0.261201090504158,0.454451365501482  
"Gm28047",0.592773248650819,-2.91477056268671,3.54419867108079,-0.8224  
06087579131,0.410845815842216,NA,NA  
"Tchh",572.336487276392,1.11413468453039,0.422759502590201,2.635386496  
82433,0.00840415278806041,0.029562361728595,3.92315042340324  
"Olfr720",4.82757628190184,2.0559380239364,1.03777486189471,1.98110216  
331776,0.0475798177471665,0.112042425897857,4.50019684538662  
"2610001J05Rik",2251.93749236758,0.00991568765700425,0.107995451119961  
0.0918157899631343,0.926844398478596,0.955159200926832,0.000454904480  
110109  
"B4galt3",2292.17613835277,-0.2606106093672,0.101294401156874,-2.57280  
369290692,0.0100878408182006,0.0340475541411244,-0.880863098771447  
"Gm9877",0.416708554898905,0.412199748666724,3.75568298105334,0.109753  
605601481,0.912604786043218,NA,NA  
"Tmco1",4507.78159268107,0.405718714907128,0.270993410770218,1.4971534  
3171627,0.134353339353778,0.246359649262375,0.56839683571104  
"Bmpr1b",487.132524179484,-0.328293251772036,0.396008103477576,-0.8290  
06398831497,0.407100786405964,0.550996191402435,-0.195671767384712  
"Cebpe",10.7840524020536,-0.119232435143281,0.70273850625529,-0.169668  
282130489,0.865271019548497,0.915213970877542,-0.010563682925609  
"Zfp961",721.991928606321,0.0105733541497062,0.13915166459494,0.075984  
3885481671,0.939431518421817,0.962511041050371,0.000404005130591001  
"Asna1",3313.04191035552,0.581446510357529,0.133779073989878,4.3463188  
4506483,1.38441287197363e-05,0.000219279302824873,4.89878237291023  
"Atp6v1a",13288.4847691337,1.03216826155168,0.260911126443431,3.956014  
7381276,7.62104613236595e-05,0.000800189324118855,7.36004320993371  
"Pmp2",0.977758124461668,-0.0779408109878422,2.42715574519079,-0.03211  
19941076198,0.974382738429254,NA,NA  
"Tcp10c",0.319388375004306,3.16508737760244,4.6981254208954,0.67369154  
5893046,0.500507437786643,NA,NA  
"C130026I21Rik",99.0852442553806,-1.86318812273105,0.375246735323981,-  
4.96523473048316,6.86180254432734e-07,2.03111775414358e-05,-20.1305164  
819174  
"Gm8174",3.46504743275007,-0.90184589802242,0.906129452660011,-0.99527

2690204455,0.319603656425843,0.464665729102311,-0.691208059172689  
"Tmem171",545.136548001067,0.208836060384364,0.54361257771881,0.384163  
40780913,0.700857337617306,0.800973102296822,0.0463465509632636  
"Cherp",2980.33951130988,-0.0614378675268111,0.121931691523905,-0.5038  
71198364914,0.614351891171113,0.733795019999878,-0.0190165899628169  
"Pkdrej",8.6665509005413,-0.550158978652273,0.668332585359983,-0.82318  
1437960176,0.41040482289483,0.55389168940288,-0.325026287193751  
"Epha3",151.380129324558,-0.841882576350861,0.37505881325059,-2.244668  
16031962,0.0247894435051538,0.067990514764874,-2.26330623464562  
"Nav2",2645.2311420634,0.228907219127332,0.352291782327778,0.649765991  
175897,0.515843389871045,0.649579326590757,0.0987575137616  
"Robo2",826.299136644908,-0.484888549958706,0.466051187308737,-1.04041  
908520553,0.298145238616382,0.442542315966978,-0.395290450841816  
"Cyp2j5",27805.5599970927,2.1304616326919,0.781317316659086,2.72675593  
803777,0.00639603283889817,0.0240131664467608,7.94481738278695  
"Spdya",27.1358003350656,-0.329591690801769,0.347847902000468,-0.94751  
6684465517,0.343375558500469,0.487983720090535,-0.236473216350384  
"Nup188",1124.11261790674,-0.0939762542976181,0.164666088602132,-0.570  
708001236884,0.568197594148409,0.695244222824329,-0.0341596255921593  
"Pbx1",6665.56193320658,-0.0923495873706706,0.144788552435165,-0.63782  
3818371441,0.523588373008044,0.656564801396286,-0.0388546004628403  
"Magi3",943.805235828121,-0.250375607714477,0.165966964151118,-1.50858  
701907991,0.131404353510278,0.241960721951402,-0.355277947782714  
"St6galnac3",283.585083700547,-0.159902415700058,0.303894265550549,-0.  
526177798749744,0.598764677945951,0.720794819447438,-0.052352172416428  
5  
"Adarb2",163.474722777061,0.717330906701108,0.413417577269863,1.735124  
35402054,0.0827187814744914,0.170527680396451,1.26885625979745  
"Gan",1756.12238976891,-0.0288486340703029,0.200405951821155,-0.143950  
98452988,0.885539175075781,0.928542233698714,-0.00213882080390582  
"Cpne8",1372.78986701634,0.438504146040921,0.241430951074656,1.8162714  
6017962,0.0693287409417182,0.149054117419961,0.834668890332249  
"Slc22a30",5763.75123797081,2.32969799620299,0.982293173076124,2.37169  
315644062,0.0177067888202117,0.052326003094345,6.8732190977919  
"D930048N14Rik",1387.32138063854,-0.0231159469179949,0.133131510716424  
, -0.173632424011418,0.862154348382659,0.912858294041004,-0.00210758766  
668499  
"H1f3",48.2805559469562,-0.128636595037974,0.69229964022588,-0.1858105  
76177683,0.852593310378807,0.90617957840098,-0.012672992081791  
"Hook2",4118.65779786431,1.01954850050528,0.240365283391721,4.24166288  
125614,2.21869783625111e-05,0.000311224247562763,8.23285093241109  
"Dlg2",157.153549242771,-0.428250246443101,0.437240742829318,-0.979438  
10924837,0.327363554959664,0.47211054693813,-0.321419844089333  
"Lrrtm4",0.419868879130785,-0.463752194858535,3.14449544079227,-0.1474  
8063833786,0.882752660984027,NA,NA  
"Serp2",100.325369146727,-0.0883730626248614,0.410448125084337,-0.2153  
08725327234,0.829526627327705,0.891135547087361,-0.0101857673103578  
"Adam17",2371.49840072464,-0.0491267815610758,0.188372314573809,-0.260  
796187976055,0.794249684302292,0.868052072435444,-0.00695161521108532  
"A1cf",485.396338644935,1.41684119315639,0.714463153920218,1.983085041

38003,0.0473579311921103,0.111654769332983,3.10620270047984  
"Isoc2b",818.284825339127,0.976749770377821,0.301846204923683,3.235918  
67131401,0.00121251925655588,0.00681240417226804,4.8730145531464  
"PlekHg3",5985.37414852814,0.447492590899451,0.156054741902642,2.86753  
600335085,0.00413681733142407,0.017205559796951,1.81794881012606  
"Pcdh15",5.68595111091,0.0509987770730557,1.53412342567551,0.033242942  
6599751,0.973480853740748,0.983749354293898,0.000835570880166434  
"Terb1",32.7889496180257,-0.121237971390508,0.326956211145981,-0.37080  
797751347,0.710780559113644,0.807944418794408,-0.0258554536425991  
"Olfr851",0.129581947825145,-0.550462304887101,4.78471990596623,-0.115  
045878485115,0.908408757662264,NA,NA  
"Sh2d6",6.64215925641615,-1.35937185342369,0.865515777799836,-1.570591  
64984751,0.11627753078184,0.221058823633415,-2.05173588369102  
"Asap2",957.851878728776,-0.593594380294207,0.129698634964469,-4.57672  
03367778,4.72322201326036e-06,9.47462786157926e-05,-5.4992411605324  
"Rnf103",2174.55426576825,0.137134084102796,0.12474597703045,1.0993066  
6597226,0.271634325749135,0.41412809043458,0.120894659805484  
"Zfp112",204.313659583993,0.115420130788476,0.12358986606721,0.9338963  
98315609,0.350357336900283,0.495306507749544,0.0810917024132479  
"Zmat1",954.092483127651,0.151842373041945,0.216591630695014,0.7010537  
41341265,0.483269477453435,0.620828110509823,0.072383415631833  
"Rap1b",6344.48606671753,-0.337803775660202,0.16399792085543,-2.059805  
23349432,0.039417164066732,0.0968564417105408,-0.788611487434536  
"Jun",5702.59046718031,-0.0777761050676369,0.149018289868091,-0.521923  
215844734,0.601723793326383,0.72340171730798,-0.0251831705998795  
"Rab7b",1057.66033274058,-1.13334380280609,0.339764122640545,-3.335678  
27585233,0.000850915757001094,0.00520751896735949,-5.95872701969767  
"Tln2",5289.32876550839,1.41495414775287,0.257209575636832,5.501172124  
90844,3.77274669610714e-08,2.16994144780817e-06,18.4521487278342  
"Tnrc6a",10375.771634792,0.435302519976992,0.303572848469639,1.4339310  
0592304,0.15159195265101,0.270325580097805,0.569431499399317  
"BC004004",5082.41984826731,0.879756330445999,0.222069701510397,3.9616  
2251969709,7.4442166188137e-05,0.000783732913788497,6.29152660607476  
"Zfp608",839.600847673817,-0.527479934521023,0.168450781858693,-3.1313  
5937216075,0.00173999096168893,0.00899903017798692,-2.48476726930972  
"Kcnt2",486.739922862782,-0.749451304724942,0.405539097940322,-1.84803  
711536398,0.0645969737715001,0.141105959511171,-1.46760865936828  
"Map1b",2578.9643918581,-0.208513193447374,0.418918601852803,-0.497741  
548179425,0.618666219466425,0.736951980294355,-0.0636450126090467  
"Klrc2",44.1480512744131,-1.35456122886706,0.308897842799899,-4.385143  
05114304,1.15909581223639e-05,0.000191201777893276,-11.5979987676826  
"Suc1g1",9006.847354,0.799198792803567,0.442935358289232,1.80432376383  
395,0.0711805665258885,0.152072754630574,1.50520798840486  
"Swt1",1529.45787821745,0.608349237432064,0.302765514794757,2.00930821  
94135,0.0445044567687383,0.106328623707494,1.36344493843688  
"Trim30b",77.1221148892562,-0.813657847011743,0.454025985055172,-1.792  
09532888931,0.0731176970179085,0.155333281374502,-1.5151792149435  
"Rep1n1",1960.64538346957,0.495537133675705,0.177527314033484,2.791328  
96463606,0.00524920918468369,0.0206515497746091,1.92266669163799  
"Traf7",3595.72641878164,-0.284602913827466,0.166126101695794,-1.71317

397400093,0.0866805381492484,0.176700375361419,-0.493302166607441  
"Gpr25",1.87807909077462,0.512398851888092,1.3864576493338,0.369574110  
059764,0.7116998445558,0.808714002514657,0.108787371645266  
"A630001G21Rik",407.821174158698,-0.610104772122418,0.353440962029038,  
-1.72618580659107,0.0843139906655818,0.173120702400749,-1.069981143685  
97  
"Zfp212",814.573878555822,-0.186163910261834,0.106613022473403,-1.7461  
6482998853,0.0807823142172259,0.167545320987924,-0.332582084683879  
"Oas1a",891.863709064676,-0.98054548205051,0.365374907167538,-2.683669  
46611606,0.00728190596490097,0.0265686007678965,-3.55744370166306  
"Grk4",701.918942786372,0.488274316113101,0.209839654108314,2.32689249  
411871,0.0199709878006681,0.057393110326336,1.39540548296019  
"1700030K09Rik",485.556344329925,-0.0104238358719437,0.25935236387783,  
-0.040191790489536,0.967940222583658,0.980359381846977,-0.000206767816  
806383  
"Nup107",550.318698600355,-0.287144602249091,0.2682656952378,-1.070373  
91416952,0.284451036182379,0.42854476151167,-0.243314874701908  
"Atad2b",1252.1245258242,0.0432770294786043,0.134873907480805,0.320870  
287566654,0.748308691384434,0.836324823146492,0.00773525821739153  
"Best2",3.50401458042622,1.13676347673937,0.743501476677422,1.52893237  
256148,0.126281209929737,0.23523751134136,1.64507816542321  
"Cysltr1",191.01628838464,-1.36866809633366,0.370799468017913,-3.69112  
745401119,0.000223262222119387,0.0018445622063067,-8.61646822592831  
"Gm9892",2.10423388716889,2.3739358941992,1.42704155232426,1.663536629  
56254,0.0962050649417167,0.19152607272142,3.92347822691824  
"Sae1",2360.54487318267,-0.433381294682968,0.174274322534734,-2.486776  
52783067,0.0128906344359611,0.0410890289737402,-1.3833592154645  
"Junb",4676.76828725576,-0.331417459274128,0.21018634759603,-1.5767791  
9172514,0.114846341167081,0.219035211234123,-0.503264961663333  
"Tas2r137",0.515344611972341,0.872827577177397,2.92205320361615,0.2987  
03519873368,0.765166271134417,NA,NA  
"Reep1",54.8369827256509,-1.15149552530143,0.337944932682368,-3.407346  
6234918,0.000655977641391472,0.00425349253470267,-6.2871826801121  
"NrK",4.9080078844037,-1.22841479932529,1.16185245700128,-1.0572898408  
2523,0.290379328336447,0.434155060494137,-1.02493221975708  
"Dnah6",12.4947703477404,-1.73120097808395,0.534130719234683,-3.241155  
98624333,0.00119046023400434,0.00671826154634348,-8.66107013583976  
"Prkcb",732.415230598501,-0.832711002860649,0.385189067698388,-2.16182  
408248585,0.030631738467182,0.0799006871749987,-2.1042364105589  
"Ubxn8",1553.92441593909,0.663696528472961,0.181005702366743,3.6667161  
2990524,0.00024568527275489,0.00198031064414007,4.13118007392757  
"Gm9894",28.5920922030741,0.171721423329443,0.347787916186168,0.493753  
277033127,0.621480434128125,0.739601166054088,0.051798771855813  
"Lamb2",6826.0837230923,-0.451693638027536,0.193096989783002,-2.339206  
00489494,0.0193247744637732,0.0559789708059203,-1.30213301548743  
"Smarca5-  
ps",10.9050248177644,0.476833275136222,0.544255281567194,0.87612062075  
5707,0.38096446371777,0.525879300075687,0.306452906844816  
"Cyp2j6",1893.11662559447,0.702555399265159,0.181410004209557,3.872748  
92763685,0.000107614672027495,0.00104966026772991,4.81903032655647

"Msl1",7645.53414545882,0.0493273747101625,0.134815007515602,0.3658893  
44362896,0.714447647841351,0.810574911557037,0.0103593167297155  
"Senp7",896.396606621338,-0.0274720998955271,0.133211960562453,-0.2062  
28478130141,0.836612443610882,0.895835544265197,-0.00302188778040053  
"Prkg1",396.617543956631,-1.00987162164776,0.237751772052827,-4.247588  
20061865,2.16084105887992e-05,0.000305304920043773,-8.17410241834263  
"Arhgef15",1480.77676385193,-0.280003597682926,0.226507575165463,-1.23  
617763105002,0.216392543548322,0.351719057527942,-0.292582074443516  
"Bpi",0.695900470081077,-1.52920929221729,2.36531693916917,-0.64651348  
2778521,0.517946868250518,NA,NA  
"Rnaseh2a",1082.96449509779,0.107830974853588,0.156411753018672,0.6894  
04554149556,0.490568718311524,0.627055780099521,0.050326848734703  
"Ctif",634.145394746902,-0.773050536787931,0.292478542902214,-2.643101  
70967444,0.00821503537063668,0.0290438367464504,-2.73578640740517  
"Fbxo31",1080.49595391362,-0.266545183982784,0.170487007343945,-1.5634  
3400083884,0.117950548032763,0.223520243516651,-0.399352199905136  
"Glis3",1707.82367516633,0.581784059927507,0.31164618036274,1.86680953  
140623,0.0619281909919452,0.136727009604437,1.15761587067818  
"Rnf157",190.480483785879,-0.576282250488857,0.329650319198623,-1.7481  
6227052288,0.0804359327548881,0.16695122597986,-1.03157609936804  
"Cpvl",2.49634858980455,0.370070884084969,1.14245566010078,0.323925817  
875788,0.745994197101412,0.834806879332208,0.0668180978199261  
"Gas1",2332.20538572043,-0.825010731985493,0.271191568144839,-3.042169  
55427193,0.00234879549470868,0.0113027530450855,-3.69828299263629  
"Mrpl35",1451.2275576425,0.365136590544387,0.349080211605301,1.0459962  
4500411,0.295562766058828,0.439939479999422,0.299820266019105  
"Cyp2f2",472.525760965837,-3.58777689973775,0.800542807523855,-4.48168  
026246472,7.40576409444175e-06,0.000134073898155455,-31.9926351076408  
"Ube2ql1",72.2488402949692,0.117331507977068,0.369155972610771,0.31783  
7219718451,0.750608416248837,0.837870343449178,0.0207549947711971  
"Uba2",3032.45861038563,-0.17077162206562,0.0946486788537989,-1.804268  
41804529,0.0711892382447612,0.152072754630574,-0.321630628124842  
"Hrh1",42.2106297567532,-0.861454230074159,0.360156152195337,-2.391890  
91960016,0.0167618231861568,0.0502030765719946,-2.5771945018935  
"Creb5",660.464744738174,-0.306103861954013,0.590053359289258,-0.51877  
3187432958,0.603918917668451,0.725029927756878,-0.0984253536826065  
"Krccl",4389.27579975544,0.264338345967405,0.175717613567378,1.5043360  
7992318,0.132494853546273,0.24357765929146,0.373330189499556  
"Cntn2",12.5367688613799,0.473333320055491,0.622355439088518,0.7605514  
31427545,0.446925038676393,0.587959274280569,0.251386187872141  
"Sv2b",4.20084054913786,-2.52557032671239,1.0102180329904,-2.500024988  
899,0.0124184546530542,0.0399496830267696,-8.13267624489724  
"Spink2",2.5094112829785,-2.70652407058353,1.27728348777104,-2.1189689  
6538343,0.0340930898077035,0.0867816011841518,-6.61572093021081  
"Gm6180",0.504287576072894,-2.37496424187981,3.64242411569496,-0.65202  
8475115308,0.514382803150565,NA,NA  
"Aph1c",1802.99827178188,1.54650585839034,0.404525753143938,3.82300965  
110636,0.000131832617424719,0.0012316590199076,10.3606508650723  
"Cdb1",175.161685830311,-0.612184905691713,0.453782613673041,-1.34907  
08706015,0.177314203554516,0.303909312667541,-0.729128100106899

"Brsk2",9.02065391795375,-0.300686150136984,0.663313448313004,-0.45330  
9292766059,0.650326042233755,0.761839532052016,-0.0817924461019689  
"Adh6a",28.3877209023067,0.0410781591296923,0.475130450112407,0.086456  
5912792456,0.931103461953531,0.957120165603645,0.00180030497907669  
"Jam2",1367.18956970544,-1.55471148670607,0.27176289333492,-5.72083799  
825479,1.05999931189114e-08,8.3338171706667e-07,-21.762500113123  
"Clec12a",1029.91656517938,-1.11729846804649,0.402071340238399,-2.7788  
5627805259,0.00545506550438345,0.0212215114009021,-4.30466041378411  
"Cfap300",164.360668344468,0.159513265528613,0.270472682323918,0.58975  
7398632887,0.555353307507007,0.684727380155028,0.0604131776788058  
"2700081015Rik",2579.53807640286,-0.850199258492838,0.205286350193268,  
-4.14152844401205,3.44999078289208e-05,0.000434825889551803,-6.5810225  
0505499  
"Lins1",432.514330080554,-0.0587053709952842,0.131191571136244,-0.4474  
7822201411,0.654529808676862,0.764696639078522,-0.0157492464548891  
"Myh7",14.9838091895039,0.871990841530988,0.879254024166309,0.99173938  
0843656,0.32132467523618,0.466645949482722,0.664617857339559  
"Tmem248",2513.58139286789,-0.258930148658801,0.164297562603195,-1.575  
98289686232,0.115029744849111,0.219222169057939,-0.392970413280969  
"Gpr141",55.0560099407645,-0.154689021302603,0.471605935631269,-0.3280  
04822703395,0.74290801618658,0.832483936758962,-0.0283608943822302  
"Yap1",5574.0720590177,-0.124726925640676,0.0880230165030297,-1.416980  
81474387,0.156488536738754,0.277005309971151,-0.160114274790772  
"Fank1",19.8655028703886,-1.18557418719926,0.560657612033295,-2.114613  
55692581,0.0344628972530948,0.0874034301041679,-2.88950601094847  
"Socs3",1976.56978772564,-0.713832151129427,0.438697285460011,-1.62716  
336478105,0.103702406215212,0.202827717562866,-1.13884663054314  
"Chmp3",5179.18309055166,-0.111982301709355,0.13526232304006,-0.827889  
83060856,0.407732894658647,0.551468922034843,-0.0666484833930961  
"Rnf26",842.879314017801,0.0179914624610076,0.161585677703096,0.111343  
175439508,0.911344219184651,0.945417753576699,0.00100983167585048  
"Supt7l",867.316241928307,0.0764998213405051,0.126191978252406,0.60621  
7783411651,0.544370145350315,0.67459826452526,0.0301132312379871  
"Mapk11",905.064383116834,-0.552116106155328,0.26283544089378,-2.10061  
513880259,0.0356747640315996,0.0897878596989969,-1.33076849032752  
"Ptprt",20.5973355845395,-3.36664939471774,1.01562875652718,-3.3148425  
279229,0.000916947635415894,0.00550548320347427,-17.5133462999728  
"Olfr352",0.579279898712118,2.44392492585724,2.1932281572297,1.1143049  
1980561,0.265148397094193,NA,NA  
"Spag16",2.46902748544529,0.38604242374192,1.16169303960067,0.33231018  
0557354,0.739655053324594,0.830365858459405,0.0717609945492259  
"Fes",2140.51209800457,-0.861001954634335,0.259352755726978,-3.3198103  
1865617,0.000900786292748986,0.00543594278428342,-4.48988610013457  
"Daw1",47.6660826710803,-0.747711511655888,0.383644784958332,-1.948968  
26692717,0.0512992144649394,0.118693732483373,-1.59352933860797  
"Gpr21",11.4750232081473,0.193078834330801,0.528785293119959,0.3651365  
43778648,0.715009483359726,0.811034657748805,0.0404392982168156  
"Cdh22",12.6477577708781,-1.62592215333723,0.653015208744306,-2.489868  
73745826,0.0127790281741394,0.040806664156464,-5.20117843024607  
"9030619P08Rik",316.688058999259,2.4573759085158,1.10345894180139,2.22

697539113159,0.025948918524487,0.070457041274258,6.51880909815978  
"Rpl18-  
ps2",2.63498924284781,1.16311261954763,1.08458471189588,1.072403664545  
92,0.283538762713873,0.427566805521662,0.988232510605427  
"Bcl3",1194.78517543873,-0.92467819046667,0.312206365203209,-2.9617531  
6561792,0.00305892901999183,0.013726811975098,-3.96539390985743  
"Mterf1b",220.476067225044,0.259239672606489,0.210084565622117,1.23397  
77167295,0.217211207771932,0.352550081506463,0.270273584924871  
"A830005F24Rik",7.36278630315088,-1.384666737144,0.811290106506799,-1.  
7067467309641,0.0878691373078261,0.178707879339522,-2.38439995028967  
"Gm609",52.5300541781247,-1.37260010103571,0.601231741354867,-2.282980  
10005689,0.0224315405856879,0.0629132292404499,-3.79661025376067  
"Spaca3",0.44373828255743,-1.48490811800342,3.84058370623116,-0.386636  
051075838,0.699025664755136,NA,NA  
"Mllt11",1054.378525539,0.656408835330786,0.215817444388269,3.04150036  
245385,0.00235402281924892,0.0113185027086227,2.94157573434704  
"Cib4",1.45935099734524,-1.79127010758002,1.92928681973892,-0.92846231  
5324597,0.353167807015044,0.498058360383214,-1.24858336781729  
"Prx",271.311563574807,-0.642332392878557,0.215744895756774,-2.9772773  
5632136,0.002908207863259,0.0132085341061784,-2.77930297886655  
"Arhgap20",67.3940041763524,-2.00749682866937,0.461736500679218,-4.347  
71092542246,1.37565751586717e-05,0.000218069676783562,-16.924595338873  
6  
"Styx",1449.88320999555,-0.0723465177507111,0.183274255570839,-0.39474  
4572964574,0.693031404065531,0.795100106882596,-0.016588134221371  
"Zfy1",0.444218496146595,0.62475565855248,2.6722363674328,0.2337950587  
62964,0.815144085818475,NA,NA  
"Btn2a2",0.370590567642787,-1.94430622618768,3.78766728909947,-0.51332  
5505591054,0.607723645441297,NA,NA  
"Raet1e",37.2293280182824,-1.30331375000336,0.481816037272557,-2.70500  
284170926,0.00683038051477013,0.0253047234043298,-4.79197734370229  
"Dand5",334.062337939615,0.168493406308023,0.138014591421851,1.2208376  
2718256,0.222147504118856,0.358012281548298,0.173074402876794  
"Ceacam3",2.58427300114861,1.52804187193562,0.907382602025321,1.684010  
54695666,0.0921796304517411,0.185462638999902,2.57460053752166  
"Olfr212",2.70806094474602,0.785183174533656,0.907548005498252,0.86516  
9853028968,0.386945569353857,0.531277002412613,0.496606162306617  
"Ndfrp2",2502.20062103277,0.228936212221569,0.211478584573164,1.082550  
33332874,0.27900806273141,0.42272897716505,0.197119578046202  
"Dspp",4.68276062287911,-2.33060162157371,1.43789314934522,-1.62084479  
130803,0.105050929613516,0.204644122849868,-3.69745937348836  
"Aldh1a1",738.738149654566,-1.52338918820894,0.358570754320692,-4.2485  
0373281274,2.15203061616516e-05,0.000304722534161134,-12.3335247944807  
"Trmt1l",2499.25969847019,0.317418832075993,0.184861467778655,1.717063  
24682035,0.0859676165677651,0.175646713595126,0.552080420008005  
"Ddx10",914.926360892884,-0.150801463421688,0.125231742327111,-1.20417  
92329918,0.228520310801855,0.3650109789477,-0.15198191413585  
"Rab4b",1927.45217126585,0.0386255029353079,0.113511025840298,0.340279  
745067683,0.733645869121436,0.825806901981859,0.0073927013912071  
"Pom121",1620.7940399753,-0.327870218318584,0.0959745242890469,-3.4162



2134360505,0.000634966125416261,0.00414343022535685,-1.79877184665399  
"AI854703",1139.7724854388,1.16310964867439,0.377532011094818,3.080823  
91557064,0.00206428686914144,0.0102337821954029,5.32943941955435  
"Slc22a26",551.181396849016,2.36762423033776,1.10508402780148,2.142483  
44087287,NA,NA,NA  
"Nrgn",210.800939355838,-0.37049625455783,0.313485837031736,-1.1818596  
2742656,0.237261403620143,0.375436036989575,-0.362963014676745  
"Sec61b",2836.94974411828,0.0679376946085779,0.210429535467355,0.32285  
246677797,0.746806976098407,0.835398055425001,0.0122183874805493  
"Slamf8",455.133113572505,-1.4496467303099,0.496835883816725,-2.917757  
70939414,0.0035255818012509,0.0153065673482053,-6.0587598099024  
"Gatd3a",6429.57451930927,0.43707736638173,0.407463632133997,1.0726782  
2674784,0.28341551275936,0.427414004778561,0.371516709555908  
"Dis3l2",870.291316596399,0.414013031976704,0.089810177751666,4.609867  
63795848,4.02925420041855e-06,8.43740065777616e-05,3.8835462328668  
"Ficd",441.633486412742,-0.187205870600429,0.157565705964572,-1.188113  
04436082,0.234788875836174,0.37273355325303,-0.184751872905467  
"Tarm1",159.313159435861,2.30477360951487,0.592566554354362,3.88947636  
780827,0.000100460750460609,0.000994306453036015,15.9339719034941  
"Zfp943",982.509912934084,-0.09415882154352,0.115087136752516,-0.81815  
2438234688,0.413270149363226,0.556833762164617,-0.0551289105514563  
"Epp13",0.229026995095479,-1.56584971755908,4.76246957708833,-0.328789  
44258084,0.742314843447175,NA,NA  
"Rxrp2",10.1221615155537,-0.306500854185009,0.6364823164901,-0.4815543  
90819869,0.630122532704088,0.745879622551258,-0.0898633090026381  
"Atp6v1e2",0.72030912745275,2.01262664696318,2.99125397938293,0.672837  
098031499,0.501050933430461,NA,NA  
"Trim50",0.47963238652201,0.909935650126202,3.07466953702999,0.2959458  
37159841,0.76727144509809,NA,NA  
"Zfp952",691.289768648955,-0.13594158789442,0.115767613506515,-1.17426  
267828152,0.240289827396833,0.378630277564526,-0.132025800102606  
"Cacng8",54.7286303173468,-1.41566964575693,0.510619369596595,-2.77245  
582531535,0.00556350700245511,0.0214976733123008,-5.43590326620201  
"Phgdh",1081.11341243807,-1.14688933810231,0.277611555783373,-4.131273  
76800286,3.60758625399943e-05,0.000451747998841715,-8.83378444820435  
"Adamts18",9.38706139258624,-1.90122200634682,0.884262249309462,-2.150  
06578402676,0.0315500116281604,0.0816522560981078,-4.76310454955591  
"Cbx7",3301.6860545593,0.0973563763414444,0.135089750176207,0.72067922  
4104389,0.471106897839169,0.609087082691342,0.0482687100332751  
"Hunk",567.138943307736,0.524890396866183,0.331192698549052,1.58484893  
889786,0.113000660171719,0.216326644283572,0.803589231407421  
"Mapk14",4569.33228352266,0.239822356756946,0.0998974863490227,2.40068  
459699829,0.0163644345710689,0.0493463880709405,0.72159926029695  
"Adamts19",0.992184430240734,-0.0853726843548453,1.74544058918575,-0.0  
489118248331053,0.96098956528835,NA,NA  
"Thoc7",3902.00449999785,0.889673267460119,0.143732196380276,6.1897980  
4014326,6.02413481982149e-10,1.05818541186378e-07,14.289522848191  
"Ggcx",1177.09552515946,-0.220476002106074,0.164777817535948,-1.338019  
91920408,0.180889943575524,0.30868126376996,-0.259157644316168  
"Hhipl2",20.5355498896423,-0.110299205625411,0.491220542364899,-0.2245

4110956841,0.822336282625909,0.886096316034262,-0.0133384416229582  
"Hs6st3",0.491854705783106,0,3.69637497973905,0,1,NA,NA  
"Tg",11.9515162375278,0.119073125418892,0.650063360658354,0.1831715685  
3495,0.85466340194826,0.907618501682864,0.0115418939094337  
"Kdm3a",1727.81563048016,-0.0726360706162199,0.112521704402709,-0.6455  
29420317521,0.518584159095934,0.651840764185954,-0.0310849676824159  
"Tnfaip6",17.4929337131158,-1.5776659094758,0.490097843558696,-3.21908  
355690786,0.00128601005846434,0.00712954908158592,-7.79920292305331  
"Tcf4",7505.24896415653,0.0365078123620828,0.270908309061129,0.1347607  
70124054,0.892801023735134,0.93382853574598,0.00249941384685407  
"Usp21",2380.66830430887,0.185177991067745,0.183327232990921,1.0100953  
7997508,0.312449595488113,0.457505423011958,0.144802993099902  
"Trim60",7.42909571757771,0.282326853489048,0.791998608161985,0.356473  
926316931,0.721485675099258,0.816039382989951,0.0573949775192952  
"Nrd1",5813.30250573005,0.366670980595326,0.155888459736239,2.35213678  
559483,0.0186659094262454,0.054491376252872,1.06690725432622  
"Kcnp1",4.04974156591002,-2.20924194555266,1.52573957757621,-1.447981  
01722068,0.147622359587343,0.26467501307899,-2.93664053683234  
"Lgals7",10.5801766582011,-0.603128707507461,0.545987674142154,-1.1046  
562698601,0.26930855882693,0.411550927189238,-0.535471240929432  
"Cstf2t",2010.96654026966,-0.116748776697901,0.17969493183427,-0.64970  
5450822491,0.515882502309476,0.649579326590757,-0.0503689615615807  
"Gm4759",22.0867088739355,0.479508789981303,0.565997326394572,0.847192  
676749543,0.396887734736053,0.541382191960512,0.294240880457015  
"Shisa7",444.098209806004,0.660062904325555,0.559008770854331,1.180773  
78878472,0.237692599296938,0.375813355586418,0.645978913459717  
"Ebf4",369.099071400232,-0.6327545735535,0.356363774369986,-1.77558612  
592468,0.0758011584437691,0.159435920964036,-1.16180901658676  
"3110082I17Rik",276.169782588767,-0.875068315516586,0.129464075331719,  
-6.75915935192404,1.38794676551591e-11,5.10607283660929e-09,-16.707535  
1835611  
"Smagp",2274.61337314384,0.747649053058347,0.260414247580747,2.8709990  
3328647,0.00409176776298518,0.0170860383883816,3.04255304953679  
"Ier2",2129.27516575149,-0.222367992433886,0.211161661172749,-1.053069  
91429646,0.292308950400769,0.436203881441466,-0.184486610259026  
"Eif3k",4989.02660739347,0.149975325555579,0.169936439131915,0.8825377  
67189293,0.377486065586541,0.522706008579389,0.0972944075055995  
"4930563E22Rik",57.1167827436127,-0.550494314303335,0.226453471820456,  
-2.43093784289515,0.0150597978631545,0.0462830873967723,-1.69165728450  
527  
"Tanc2",2831.02161887181,1.16848445702658,0.326418125998082,3.57971682  
31811,0.000343966746721453,0.00257651311086242,6.96570777877981  
"Zfand2a",872.342331220639,-0.467905483749092,0.192052507596766,-2.436  
34144434868,0.0148366723115148,0.0458382881841097,-1.44238207850296  
"Fate1",0.219476833423174,-0.0674470221364578,4.7847199059589,-0.01409  
63365593165,0.988753123168312,NA,NA  
"Zfp472",342.679888009211,-0.333268784711308,0.115232875276768,-2.8921  
3285627784,0.00382636104586292,0.0162364282202906,-1.37323332940899  
"Rpia",1605.15197330201,0.483112317845133,0.145432351153125,3.32190406  
064787,0.000894054291830741,0.00541038813845927,2.52157307211308

"Sh3pxd2a",5041.60507859096,-2.63732187207559,0.443707550262155,-5.943  
8291516955,2.78439809646105e-09,3.15640663283707e-07,-39.4771781373049  
"Tll1",48.8655608183367,-0.883626407217007,0.366884000046885,-2.408462  
63970107,0.0160198658458171,0.0485551599971619,-2.67301831142212  
"Dennd4a",952.025090274454,-0.735857858223715,0.163672010496267,-4.495  
92973161712,6.92666104406166e-06,0.000127051775199543,-6.6013189427062  
8  
"Aldh7a1",9075.20738964396,1.27799752091967,0.299028297237708,4.273834  
72642974,1.92139481115137e-05,0.000279786079371392,10.4559178657121  
"Plxbn1",5498.94377346272,-0.207081592773563,0.20212860329189,-1.02450  
414934358,0.305597211982588,0.450139374674274,-0.165292117883872  
"Gper1",109.305189837227,0.219299727852553,0.262936742142694,0.8340398  
7615219,0.404258513591147,0.548100444892579,0.131864206008736  
"Krt42",3.3373200623072,0.297261916334539,1.03992947910874,0.285848148  
654564,0.774994428689532,0.854443956493554,0.0467605969557899  
"Tgm5",36.6623182623517,-2.81051861154267,0.753273699280639,-3.7310722  
7057928,0.000190666512594556,0.00163339879726215,-18.0353572944276  
"BC048403",287.751676440849,-0.166031143450082,0.159042861999194,-1.04  
393961076306,0.296513330294348,0.440897149320796,-0.135970151001007  
"Dpep2",312.008667023555,-1.08941079807486,0.420757905812092,-2.589162  
99141717,0.00962095440478066,0.0328125536093079,-3.72245580421366  
"Mast1",22.5222570266574,-0.384319404509929,0.389349876182424,-0.98707  
9816945575,0.323603511291944,0.468489847280244,-0.291406671267493  
"Neb1",585.938730330227,-0.408596857098829,0.409559085795176,-0.997650  
574166903,0.318448828034189,0.463505169379712,-0.314185544324521  
"B430305J03Rik",2.4092874866949,-0.594723312308319,1.22453276629563,-0  
.485673661561081,0.627198560646341,0.743682652364532,-0.17612188367480  
6  
"Dusp7",1468.85553661314,0.201408262697324,0.183045219063782,1.1003197  
1185843,0.271192846538201,0.413674868050863,0.177778029529683  
"Spinkl",0.803055255277063,-1.26677951155413,1.98133284565746,-0.63935  
724597236,0.522590555475749,NA,NA  
"Tmem39b",581.893339723713,0.335858859175601,0.168885346546353,1.98867  
969331738,0.0467365687792957,0.110443536305746,0.739981324441401  
"Gm6457",0.443466371519398,2.74675837455538,4.52716168400014,0.6067285  
78805336,0.544031052865392,NA,NA  
"Gm5114",0.14728986473751,0.4.7847199059615,0,1,NA,NA  
"Ptrh1",249.88962866125,-0.610210329217064,0.276375759408284,-2.207901  
04936669,0.0272511716850206,0.0731806135382821,-1.59559306267302  
"Sox14",0.446274309725509,2.33816462212349,3.62566291435865,0.64489299  
6771348,0.51899653040558,NA,NA  
"Chd8",5189.08648220366,0.0729719564274048,0.208258698698202,0.3503909  
17083142,0.726045342001507,0.819664876286572,0.0145111820724687  
"Oas1f",6.23734967822022,-0.123107798734922,0.824563039234262,-0.14930  
0651226433,0.881316401428391,0.925956848531672,-0.00947039307222881  
"Chchd3",5749.0464994532,0.191201306232101,0.390225259162842,0.4899767  
55072928,0.624150347613954,0.741692069586597,0.0571349889533617  
"Lysmd1",699.899338269765,0.20776034546277,0.174182635917406,1.1927730  
0155962,0.232958286434112,0.370249483933185,0.206426154162631  
"Ubxn7",2271.82654463925,-0.0868712782531174,0.131305354418858,-0.6615

97378397853,0.508229288127198,0.642747349143046,-0.0383974139965967  
"1700016K19Rik",13.5717586495925,-0.418838191516164,0.614178308310675,  
-0.681948850763222,0.495271294316428,0.631245894664774,-0.192690615423  
39  
"Krt16",1.84805884758714,0.587405899861807,1.28886042417809,0.45575602  
2019529,0.648565431749073,0.760438953740984,0.160866651799016  
"Exoc6",2205.2289354954,0.747048325742262,0.186862147744515,3.99785796  
513296,6.3918284494863e-05,0.00069858672145787,5.42839022779966  
"Grwd1",649.2730502294,-0.177426230057433,0.108589164561009,-1.6339220  
4714632,0.102275219747607,0.200720909374821,-0.284918110017465  
"Camk2d",2233.37950340866,-0.353549791171872,0.164664439563074,-2.1470  
9254839717,0.0317859144242106,0.0821420489653091,-0.88362884071706  
"Ppfia2",31.1953056493846,-1.79674047700583,0.463671612572396,-3.87502  
799025741,0.000106612444261028,0.00104144761432942,-12.3384748618174  
"H2-  
T24",303.651581979106,-1.13563355671014,0.2696804268856,-4.21103440774  
321,2.54204020957713e-05,0.000346061422803521,-9.04974374982394  
"Nudcd3",3790.42192029024,-0.159517114356475,0.16107681566685,-0.99031  
703411867,0.322019183180881,0.467132656324739,-0.121415175614759  
"Txlna",3141.82690247087,-0.195991935731696,0.0840449998877064,-2.3319  
8805394209,0.0197013196160176,0.0567745092925083,-0.5622357617664  
"Lipg",163.282405433596,-2.19652220812543,0.701895132357547,-3.1294164  
9950995,0.00175153845774262,0.00903478752620785,-10.3383114896407  
"Adgrg4",106.968582928848,2.53163979792177,0.831927554731702,3.0431012  
694828,0.0023415351956439,0.0112812585235149,11.3534234019975  
"Gm9925",10.9945592783996,0.130953960700165,0.641708407553493,0.204070  
819641315,0.838298157037997,0.896655738983316,0.014284887841893  
"Slc51b",878.128782029863,1.98325784709251,0.763423685429729,2.5978468  
9019197,0.00938103127605134,0.0322083725691934,6.81353953590728  
"Fpgt",909.993776138782,0.105901915823893,0.153239890711714,0.69108582  
1922984,0.489511609641193,0.62612722474937,0.0495834563979704  
"Aym1",0.291330136303653,-0.060738045090329,4.78471990595801,-0.012694  
169415162,0.989871790225381,NA,NA  
"Srcap",2658.93228496166,-0.289244437226818,0.256490744334418,-1.12769  
931709385,0.259446926173807,0.400742711340105,-0.264495432255071  
"Sh2d4a",2005.0954729111,0.0565325436117702,0.201855301947517,0.280064  
695186797,0.779427870376543,0.857489398894196,0.00869167861475686  
"Slc39a8",1493.65299894992,1.16494801987119,0.399748455833317,2.914202  
67638742,0.00356598310205109,0.0154158870270921,4.86057864811949  
"Ech1",15455.5980179183,1.03819015331486,0.35987545079429,2.8848596119  
1142,0.0039158824120295,0.0165407008816619,4.25858459733572  
"Mat2a",17320.9389125508,1.10184482305561,0.277907440638749,3.96479065  
304298,7.34603886948898e-05,0.000776698269304374,7.88971425102383  
"Kdm4d",5.5935343746795,-0.576644811350934,0.654378058119368,-0.881210  
493224921,0.378203900851858,0.523177036858622,-0.373570904488616  
"Nanp",548.245219483229,0.879745728578872,0.184355642537303,4.77200326  
754773,1.82402544418744e-06,4.41251217255171e-05,8.8225135737873  
"Cyhr1",6673.5909593475,0.533327473539316,0.154849636587796,3.44416354  
659593,0.000572829088035107,0.00382630759142687,2.96842339385185  
"Shisa6",15.6979093950751,-1.6502413349964,0.750935103041855,-2.197581

8260615,0.0279789195092747,0.0745507491397438,-4.28448063391178  
"Cnn3",7712.05907874918,0.591666672496535,0.179762201409255,3.29138532  
93859,0.00099695252354869,0.00586028950984394,3.04090415768325  
"Adnp2",1007.85766270796,-0.655623658861455,0.108216615147671,-6.05843  
805007945,1.37449663286185e-09,2.0411243243503e-07,-10.0996168424651  
"Stum",53.2014280713896,-1.97866938880789,0.602808819027902,-3.2824161  
2655687,0.00102921598582393,0.00601007885342767,-10.1195433041119  
"Lgals4",1889.8205443576,0.859500909944008,0.264786900656829,3.2460099  
3407127,0.00117034755480387,0.00662970267971117,4.3114244424086  
"Pde5a",733.654645606306,-0.882523609682666,0.282902505961214,-3.11953  
266968819,0.0018113817259441,0.00925775121689594,-4.13223509863878  
"Cd8a",543.836536449786,-0.732527960325067,0.452705456586169,-1.618111  
62129351,0.105638544462244,0.20548047744658,-1.15915535752934  
"Zfp14",382.062049692772,-0.0916735604680112,0.214855229700286,-0.4266  
75955693012,0.669615365873399,0.776320632881409,-0.0232107973706683  
"Tusc1",328.495274401756,0.338681496557649,0.240015671626841,1.4110807  
6094384,0.158220802139485,0.279083517289278,0.432240294556321  
"Tdrd9",4.22753753073442,0.042260682989899,1.30729378370563,0.03232684  
45980885,0.974211401495105,0.984077077375299,0.000678328518762072  
"Mill1",4.87934168053422,0.61985173266136,0.886278732800166,0.69938689  
6832062,0.484310274347795,0.621828113343429,0.294486332552379  
"Ndst1",4860.82930840025,0.249409505316497,0.179089671876049,1.3926515  
2872198,0.163725192791173,0.286249794242608,0.311983966573078  
"Tmem179",15.0784703690907,0.0554696630242075,0.891927149804669,0.0621  
908000405137,0.950410888813454,0.969301784186878,0.00172950397682521  
"Sirt5",1975.53603857911,0.839061425499259,0.264932959292443,3.1670707  
4778519,0.00153982852046504,0.00822113266484866,4.02837357936966  
"Nt5dc3",595.703654729475,-0.390308712020759,0.173855247722065,-2.2450  
2117212319,0.0247667734165062,0.0679378936515248,-1.04960309114672  
"Rdh18-  
ps",10.2454239847402,2.02154139076841,0.61467634242673,3.2887899716254  
,0.00100619077547389,0.00589859889400323,10.3766536935027  
"Tceal5",41.9351790441132,-0.603462881961653,0.426916395316898,-1.4135  
3878319362,0.157497366348995,0.278184948733826,-0.772112112445683  
"Olfr279",5.47644845698091,1.2464115814311,0.877489176739768,1.4204295  
7847301,0.155482656759901,0.275675260662412,1.60604083117327  
"Klk13",2.71571877993052,-1.2623822352496,1.3522875252137,-0.933516143  
358723,0.350553539326559,0.495477498516476,-0.886486890784346  
"Ercc6",1223.32126476219,0.260842856153334,0.175850254786007,1.4833237  
3172137,0.137988420062484,0.251491214752114,0.360053711727793  
"Rdh19",4.06515492803903,1.26236279281521,0.836448765767621,1.50919320  
402932,0.131249416427169,0.241743918524177,1.79239901280545  
"A930004D18Rik",179.348404773996,-0.334418496098351,0.352287967626733,  
-0.949275952713446,0.342480280684343,0.487066412310964,-0.240565548687  
894  
"Pkp3",1540.52630255095,0.291994458388088,0.190410127137594,1.53350277  
518111,0.12515202339808,0.233781773540502,0.424375165619106  
"Iigp1",3029.89497287331,-1.09593399378023,0.542583137441227,-2.019845  
28850003,0.0433994378265797,0.104469412190451,-2.47556250970947  
"Skida1",249.185444612318,0.423656387985225,0.283291949418862,1.495476

27051988,0.134790188356916,0.246952138848571,0.592509187662338  
"Utp18",1002.12804239863,-0.101183841928993,0.141664901055502,-0.71424  
7785973118,0.475073972823439,0.612631767335411,-0.0495791950978457  
"Capn12",24.75527272239,-1.89442247228253,0.744369273673461,-2.5450035  
8798202,0.0109276615400252,0.0363162680598962,-6.28093778166421  
"Fbxw28",0.157863633167365,0,4.78471990595081,0,1,NA,NA  
"1810037I17Rik",4721.21368942876,0.223453279854679,0.220700093823368,1  
.01247478414538,0.311311097315047,0.456421067407232,0.175263234263003  
"Slc25a40",600.088434233869,0.154617819651322,0.105346015931228,1.4677  
1397365668,0.142181933415966,0.257238873317668,0.209932369001336  
"Try4",1.44159808850869,1.75311515496299,4.01219438763397,0.4369467143  
38241,0.662149992484934,0.770736108499268,0.456527377656072  
"Skp2",329.300839569597,-0.152457753384509,0.247538970550381,-0.615893  
946094759,0.537964517384689,0.669254907163061,-0.0612255494727246  
"H2-  
T3",0.942862835333436,-2.09526822994977,2.13683668758549,-0.9805467315  
88227,0.326816313866041,NA,NA  
"Umodl1",0.0753649833681825,-0.0469963211071692,4.78471990596623,-0.00  
982216765678757,0.9921631700829,NA,NA  
"Adm2",59.104192866428,1.8720419168768,0.622898418092816,3.00537272611  
575,0.0026525558121668,0.0123394484712482,8.22753802817338  
"Vmn1r236",35.0412762832875,0.515892786659366,0.434015005201479,1.1886  
5196013183,0.23457665201962,0.372457293247438,0.50951268729328  
"Krt15",1761.37280759763,-1.33405881640062,0.759078502267389,-1.757471  
47681794,0.0788374794635467,0.164438722141659,-2.40826603851232  
"Syne3",168.949630643136,-0.768169506017357,0.32023901909545,-2.398738  
00571565,0.0164516810579648,0.0495203445829637,-2.3086348881724  
"Fam83e",27.9180265184409,-3.23548250418453,0.817502034445507,-3.95776  
691415708,7.56537276194708e-05,0.000794771757071359,-23.0931126617474  
"Spock3",43.0765351024857,0.879145377385285,0.738236524039529,1.190872  
23235004,0.233703746872724,0.371282950910485,0.871049183550494  
"Ceacam10",0.238306107034699,-0.547854530422708,4.78471990595988,-0.11  
4500857143236,0.908840766966445,NA,NA  
"Klf1",51.5811799450938,2.1382143707937,0.542925254442243,3.9383218100  
4424,8.20534966757812e-05,0.000849192716658377,15.1197936416245  
"Cthrc1",39.9501189092067,-1.14305465055839,0.437314905945475,-2.61380  
21709713,0.00895408659208878,0.0310575110419134,-3.96858812798005  
"Gon4l",3368.44112376949,0.0516801114517098,0.157623915788777,0.327869  
734697896,0.743010158153274,0.832550546731368,0.00947096658846068  
"Ffar4",134.457606040986,-2.51281176351204,0.646673453271434,-3.885750  
60689451,0.000102014193648848,0.00100559795134745,-17.3438613522358  
"Ifi205",513.691973462169,-1.10627903227454,0.377329262002339,-2.93186  
652528339,0.00336931521039142,0.0147708760671054,-4.6630743928355  
"Alkal2",19.7520905685309,-1.48101612058966,0.780452990108789,-1.89763  
655128443,0.0577439760052994,0.129879752490958,-3.02297048210603  
"Gzmm",48.288013649973,-0.474964519342014,0.343227659352742,-1.3838177  
2680471,0.16641427368859,0.289476805101269,-0.588804065554578  
"Tprkb",3630.02357995486,1.42687585362333,0.249210962469602,5.72557418  
615716,1.03084485908612e-08,8.1704931148216e-07,20.0013270043671  
"Fra10ac1",1158.39606094143,0.190776097284709,0.135814367637963,1.4046

8273425428,0.160115642188161,0.28150899832144,0.241826038425576  
"Fgfr3",2121.40826984231,0.41739924865915,0.199783159756788,2.08926142  
307131,0.0366841969595592,0.0917370979391868,0.99709518929139  
"Msi1",171.059694882418,-0.612713763973849,0.384568673197823,-1.593249  
28595696,0.111104278642405,0.213429677336908,-0.946304474261069  
"Lifr",4019.08687852541,0.620724602660464,0.167545784073542,3.70480586  
003886,0.000211552699341845,0.001765776768736,3.93487542120873  
"Arfgap3",1389.40775447909,0.0359083711876746,0.0895769739080976,0.400  
866088918288,0.688518717968664,0.791179747934525,0.00841082121778729  
"Prr14l",1018.79669922523,0.237135784827748,0.190983720127548,1.241654  
44399857,0.214364084947035,0.349033062905828,0.249606429725004  
"P2ry10b",57.2410061144582,-0.813448620272321,0.338391705157062,-2.403  
86690298678,0.0162226785189263,0.0490402768623295,-2.45263978779264  
"Eapp",2173.39572120591,0.705119984175977,0.187616333059316,3.75830809  
971673,0.000171066162145278,0.00150110172345123,4.58437703434637  
"D130007C19Rik",106.411172375677,0.661350966700936,0.4111584520105,1.6  
0850631542909,0.107724334159126,0.20839458948652,1.0372112255598  
"Cpsf3",2139.13555550433,0.12176916459901,0.241992398492388,0.50319417  
2038592,0.614827761885762,0.734168665109975,0.0376286795651308  
"Obox1",0.110428945274772,-0.058772207075247,4.78471990596623,-0.01228  
331192427,0.990199581508171,NA,NA  
"Mrps21",4809.8123955119,1.07085194660545,0.23657995415757,4.526384961  
13763,6.00012373716668e-06,0.00011413698792905,9.72131303124985  
"Lrrc36",29.1623112184176,-0.704274688512074,0.435736424141032,-1.6162  
8601487794,0.106032489088291,0.205877461884435,-1.11308792730047  
"Taf4b",235.131555155639,0.0934921790548665,0.159770022405609,0.585167  
215020584,0.5584352871058,0.687223632162894,0.0350684975037585  
"Kcnn4",616.665394882598,-1.63946335067229,0.273124296175851,-6.002627  
27859526,1.94149957148549e-09,2.50697739369696e-07,-24.9182327298064  
"Bsx",1.44336225556438,1.60312834832099,1.35944642751763,1.17925084495  
483,0.23829830523785,0.376404759845074,1.56640103959296  
"Lexm",3.35972355330723,1.48484170753773,1.31162351209482,1.1320639603  
0997,0.257607545257059,0.39854256267731,1.36596673444123  
"Rhob",10999.8752471636,-0.894154663443615,0.167893681003699,-5.325719  
5750203,1.00554162945585e-07,4.58085296521733e-06,-10.9924024285962  
"Zfp747",372.386294952332,-0.313660562837961,0.194913255676314,-1.6092  
3156175097,0.107565717490395,0.208149698256026,-0.492289549202756  
"Pnma1",8.57092990872579,-1.28888306316173,0.639592575667793,-2.015162  
6397727,0.0438876106678307,0.105319462498629,-2.90096263829693  
"Ceacam2",427.877981441492,2.84575288123217,0.874725372197151,3.253310  
09215401,0.00114068943160247,0.00650136291651122,14.3304814166078  
"Mdm4",7923.73269041562,-0.00899025793640455,0.211857141060253,-0.0424  
354727502326,0.966151550641982,0.979463574815025,-0.000186549918306561  
"Cklf",356.312738910485,-0.344083205510487,0.24744523721494,-1.3905428  
5054435,0.164364096674563,0.287012776889152,-0.429494479123282  
"Slfn5",8228.31154897024,-0.743407208227867,0.192795471340362,-3.85593  
708741972,0.000115287137263269,0.001111705540237,-5.05655169400697  
"Dnajc8",3253.32453802702,-0.262658765112845,0.138717036600831,-1.8934  
8598808858,0.0582932698634224,0.130704022055774,-0.534463278388387  
"Spcs3",3556.49278215784,-0.0385668417101806,0.172604721654482,-0.2234

40247407502,0.823192883102709,0.886645567723203,-0.00463997525901228  
"Tmem74",1.13299309414135,-0.507518434826614,1.88661463481257,-0.26901  
0122926898,0.787921892754041,NA,NA  
"Slc30a7",1452.45847536297,0.0620330255837663,0.154107151997388,0.4025  
31775973757,0.687292707693551,0.79005030153336,0.0146186198536117  
"Fabp1",33.1075470776352,1.30739456269408,0.725086311199498,1.80308818  
757216,0.0713743659865081,0.152310882701077,2.46029635722547  
"Cadps",2.39117673823583,0.0277022979575923,1.95463050906075,0.0141726  
51981629,0.98869223835332,0.992458878882467,0.000209698060902923  
"Atpif1",8374.62027284609,1.04515794251149,0.380401558911185,2.7475122  
4864332,0.00600492658947339,0.0228590508866755,3.94903327756639  
"Tmem120b",1246.9997314297,-1.91656706297016,0.621324987098885,-3.0846  
4507748041,0.00203795190074723,0.010134145922155,-8.80057844975643  
"Gimap4",2383.95991853732,-0.799627817043791,0.25646155189496,-3.11792  
4738174,0.00182129306123689,0.00929379013556582,-3.7409858393401  
"Cpa1",1.13482250925957,3.07935120279507,2.79907020080808,1.1001336093  
343,0.271273912001909,NA,NA  
"Tle5",19736.5425033311,0.741210097971347,0.19423687487767,3.816011241  
11042,0.000135626328110484,0.00126166132895907,4.94781897281617  
"Sytl5",18.3517188535069,-0.652273458309835,0.507554769751089,-1.28512  
920611448,0.198747137110833,0.329998439869456,-0.723154287935421  
"Vapb",7384.17901923153,-0.166034665250888,0.257030020860663,-0.645973  
82319358,0.518296308208646,0.651604965984408,-0.0711154333658291  
"Vsnl1",4.44280193978197,-4.31871341766896,1.43428378518061,-3.0110592  
2153693,0.00260338072000721,0.0121991630085798,-19.0299267002848  
"Lclat1",1716.94232819339,0.209848351549428,0.181689862274315,1.154981  
07006432,0.248098178472886,0.387458412804512,0.19896703413929  
"Thns12",5814.13291569628,2.10834458269105,0.529307089712002,3.9832162  
1544538,6.79888466639107e-05,0.000734837323865262,15.2135223160114  
"Kcnn2",90.7675154021214,2.11411242547609,0.354232871402964,5.96814298  
205303,2.39969041035958e-09,2.90615923112988e-07,31.8200627476721  
"Tmem62",886.983733822118,0.485479055007669,0.122919228126924,3.949577  
80329024,7.82891608394928e-05,0.000817612243196803,3.45133000724316  
"Dedd2",1663.56761086765,0.65809913099784,0.174817127096641,3.76450032  
057806,0.000166882454203308,0.0014743425881541,4.29050564301373  
"Parp4",1833.64697213554,0.28860765306926,0.223827668629696,1.28941901  
97135,0.197252452664054,0.328307740885025,0.321452322648896  
"Trim65",933.21388403316,-0.379035586532451,0.119768530654231,-3.16473  
437940655,0.00155224586448125,0.0082625415958655,-1.81786340580823  
"Zfp867",272.246203320921,-0.401598159683854,0.140316242223294,-2.8620  
9317838463,0.00420853159943444,0.0174352403892995,-1.62617609145866  
"Sh3bp2",1227.91843649627,-0.0382166940515506,0.284601714828995,-0.134  
281320386679,0.893180123631054,0.93382853574598,-0.00261640805387282  
"Tmprss11e",1.61238894140696,-3.36478072347166,1.86499860694686,-1.804  
17331730883,0.071204140892416,0.152073811374445,-6.33719192682294  
"Ugt1a6a",2457.66137587535,-2.95328979860463,0.728133829029161,-4.0559  
7114275315,4.9926423742084e-05,0.000578117353584453,-22.0189422064951  
"Adam12",822.243024014122,-1.9535488723988,0.33309718663536,-5.8648014  
7770611,4.49670376026884e-09,4.48564132124303e-07,-28.5554422656601  
"Usp17la",25.7136687709962,0.722606200551671,0.408742527194723,1.76787



623619948,0.0770815963592398,0.161484577824482,1.31756086104057  
"Pla2r1",1161.16764056241,-0.92659845036511,0.158161623987003,-5.85855  
422451437,4.66914162968562e-09,4.57482027616132e-07,-13.526047043474  
"Pabpc1l",41.3095305181015,-1.05618914186468,0.386826684237792,-2.7303  
9370059438,0.00632587300236151,0.0238203692159221,-3.94720507462768  
"Oscar",14.6608744167952,-0.649028097681888,0.425844549074841,-1.52409  
629075192,0.127484659158073,0.236687857956971,-0.935257965689724  
"9130230L23Rik",82.391355744844,0.706868111316924,0.252776046153091,2.  
79642047604787,0.00516721256484055,0.0203824217255232,2.7518958242924  
"Cggbp1",3135.81094126258,-0.367908868095621,0.163080335553392,-2.2559  
9773784601,0.0240707728041255,0.0663741943338762,-0.99793328257807  
"Kdm2a",5209.36745655147,-0.186318595091036,0.18448812020027,-1.009921  
91198425,0.312532703657623,0.45755839134377,-0.145673337234416  
"Mgmt",362.415772282507,0.0987497616009765,0.343632229703611,0.2873704  
88170303,0.773828655656437,0.853786279311295,0.0156098068396712  
"Mettl7a1",12818.2024783476,1.0979734024009,0.380295790831742,2.887156  
33691218,0.00388741019648743,0.0164418056423236,4.51039575228978  
"Xlr",87.2427421975048,-0.81907604151598,0.344743543616871,-2.37589958  
298467,0.0175062262585404,0.0519041214724126,-2.423119406611  
"Ugt2b5",419.715176597547,1.56198053631849,0.574402092163117,2.7193155  
4155086,0.00654171700633298,0.0244396241022189,5.79736811799135  
"Slc8a1",4959.57318642288,1.17286773251381,0.329639945222615,3.5580267  
1827814,0.000373651313844934,0.0027440502136906,6.91794952052278  
"Mmrn1",181.444424473356,-1.56151867460171,0.321392448326033,-4.858604  
12319844,1.1821623444363e-06,3.13957766841986e-05,-16.1911328820412  
"Zfp869",2335.87297668213,-0.102454435720507,0.10161982485504,-1.00821  
307128464,0.313352184085072,0.45848273189935,-0.0798973141281081  
"Pm20d2",21.6026475461689,-0.339235030683903,0.590388817812156,-0.5745  
95961930697,0.565564583683615,0.69302276600447,-0.124394917387944  
"Ano9",634.022653508075,0.462402023647171,0.197718293202187,2.33869115  
577646,0.019351423216564,0.0560230583957024,1.33263889406061  
"Olfr63",42.0075517883537,0.448451113789406,0.369918016148425,1.212298  
65595265,0.225398078195999,0.361474891319756,0.456327124697191  
"Irs4",0.711728778165164,2.22459538812479,3.26906584164948,0.680498801  
762378,0.496188680276677,NA,NA  
"5830411N06Rik",48.6257038281567,0.281781656431108,0.525308720800627,0.  
.536411533396291,0.591674162163794,0.714677173104297,0.094657318199314  
6  
"Tmem119",1641.69593557376,-1.51602972192632,0.39578683032409,-3.83041  
982646294,0.000127924810217656,0.00120488723272203,-10.1897956296636  
"1600014C10Rik",2989.6987792998,-0.289099486249539,0.395013904640226,-  
0.731871670474101,0.464246898895287,0.603177586103839,-0.1461524011930  
28  
"Srsf12",19.2006043942301,-1.05558426438162,0.461329058758248,-2.28813  
738120664,0.0221295219386964,0.0623077861026284,-2.92995239647976  
"Emcn",4260.74324838738,-0.240204406411602,0.218847496489512,-1.097588  
09337402,0.272384394365132,0.414982881804293,-0.211264101103979  
"Adam10",4633.70027427216,-0.583564803391624,0.158560138737017,-3.6804  
0043380326,0.000232867974738772,0.00190615439607749,-3.65467231185519  
"Ap1s3",683.626994135921,0.0718150879416838,0.214888582402024,0.334196

852801275,0.738231018708132,0.829133403323375,0.0134562958012732  
"Ankrd24",2164.66325203812,0.878874326145975,0.233947487163034,3.75671  
624775137,0.000172157511139165,0.00150999871893452,5.70885691995456  
"Zscan22",434.630341327424,-0.25172247966799,0.14931622797201,-1.68583  
470857017,0.0918276405305674,0.184964394118286,-0.424804826961977  
"Zfp771",1391.53151416596,0.423739117595696,0.17178389742419,2.4666987  
0662759,0.0136365044428055,0.0430512570637666,1.33281370165843  
"Hmgb2",2484.05202716274,-0.0254485061862213,0.232503864634713,-0.1094  
54121230214,0.912842309022502,0.946353538447837,-0.00140320672112841  
"Lrrc8c",811.754877193034,-0.942239769790624,0.164611072157972,-5.7240  
3640556079,1.04022443818671e-08,8.21145590921641e-07,-13.203196405691  
"Vmac",957.053104279645,-0.0667763631488,0.181295611747021,-0.36832862  
3651295,0.712628211861562,0.809438708777626,-0.0141174729728959  
"1700013H16Rik",1.06988733269841,-0.248207897351763,1.48751185243201,-  
0.166861122448171,0.867479324003717,NA,NA  
"Phactr1",1547.86184319731,0.512894734215074,0.454285211056357,1.12901  
481653438,0.258891583414684,0.400021245219076,0.469933450709264  
"Msra",7171.41984978445,1.58245155404264,0.437820541160516,3.614383989  
03828,0.00030106258394437,0.00231471540289721,9.60305746405117  
"Zfp182",853.030517228513,-0.0511631638935365,0.206577785204747,-0.247  
67021218098,0.804389581142527,0.875466818482667,-0.0068045999067091  
"Gm9955",0.510055759146321,-1.07200145627739,2.68040967671552,-0.39993  
9406871185,0.689201146600275,NA,NA  
"Fsd1l",462.591118718842,-0.222077675660531,0.209374215049142,-1.06067  
347217711,0.288838319750298,0.432747007721784,-0.186012705180952  
"AU018091",10.0326519185074,-0.126913734216077,0.595965146624243,-0.21  
295496042841,0.831362093207673,0.892330627692681,-0.0144578293677616  
"Akr1c20",13.4288119902396,0.952397652048317,0.758786660168129,1.25515  
866585911,0.209421167194757,0.343024920198014,1.01901994481391  
"Defb42",66.6619362341712,2.09526015523263,0.393884814610957,5.3194743  
1713541,1.04067502172698e-07,4.70790755768737e-06,25.701020506747  
"Set",9025.87010480732,-0.421212903518907,0.0931127522664137,-4.523686  
53343781,6.07717108402236e-06,0.00011526525466563,-3.81967424187525  
"Kctd18",829.411948900009,-0.331240315406965,0.127361582561786,-2.6007  
8674231513,0.00930102530056022,0.0320040182574136,-1.14009399238816  
"Klhl18",1335.61357348536,-0.11473522005477,0.170102697656287,-0.67450  
5587716234,0.499989934468014,0.635389870411235,-0.0520343153502259  
"Cadm4",2335.63014083921,0.559364812020073,0.356113783691406,1.5707474  
3420995,0.116241326405579,0.221011543857239,0.844383750859201  
"Actn4",18684.0205917416,-0.278273266694134,0.111213411937539,-2.50215  
564693242,0.0123439643170332,0.0397493998767156,-0.897475957809022  
"Usp46",1280.68579306324,-0.297650060547107,0.188605092673944,-1.57816  
555389455,0.114527581420292,0.218504221385041,-0.452710843156789  
"Nsd3",4541.6770529793,0.261418049871428,0.116665406012113,2.240750354  
43057,0.025042250383846,0.0685681502575802,0.700581325173558  
"Cyp2c50",2.36970484144572,1.24617065125756,0.949237747806544,1.312811  
94214743,0.189246324934164,0.318563830058391,1.42553500347048  
"Elp6",375.852747357779,-0.0773989373924681,0.149941308027539,-0.51619  
489259259,0.60571829709883,0.726519153348486,-0.0247282199789644  
"Atrnl1",1951.5940645505,0.0674869964099421,0.18775082738434,0.3594497

94976356,0.719258629282114,0.81414043269295,0.0138768385838906  
"Smim10l2a",100.414410847422,0.731667520179072,0.341008507671783,2.145  
59902089978,0.0319049836338672,0.0823847159547021,1.82650212495068  
"Rnd1",194.445576644075,-0.68661410491799,0.254280436312954,-2.7002238  
7437208,0.00692928305555509,0.0255642688774292,-2.51751157182465  
"Tafa5",440.49604858364,0.784790895328383,0.140423619177518,5.58873856  
068529,2.28725000028307e-08,1.51445687513816e-06,10.5165540425403  
"Tmem158",782.827630807329,-0.911664646995036,0.417637077736544,-2.182  
91118196679,0.0290423514113826,0.0767196542228882,-2.34078773665258  
"Pcnx3",4065.88857335835,0.00353095933431148,0.161969253288363,0.02180  
01828286824,0.982607348346294,0.988843275184532,3.96153435980284e-05  
"4930578G10Rik",7.08401265165482,-1.14380869574602,0.716160227750928,-  
1.5971407674203,0.110234332557432,0.212113788236929,-1.77362683599086  
"Dsp",1981.65878854233,-0.436922718418882,0.285021662429474,-1.5329456  
5295364,0.125289246087208,0.233970857217545,-0.634655901628162  
"Olfr1535",0.755847661106642,-1.10113480911238,2.66493952447235,-0.413  
193169676298,0.679465092017212,NA,NA  
"Txk",62.7924939322002,-0.253247214278295,0.237118356905372,-1.0680202  
8144687,0.285511363273895,0.429677412867738,-0.213923127263273  
"Zfp667",275.88434403624,-0.521326456142688,0.26518538455258,-1.965894  
37620127,0.0493108128346728,0.115158968577129,-1.12681677796257  
"Dmac2l",650.21235181829,0.0862041762326512,0.151135012304147,0.570378  
596715712,0.568420943101264,0.695299344328008,0.0313277023394206  
"Arhgef33",28.6515273574811,0.239291975752768,0.368023204154979,0.6502  
08935336587,0.515557270099313,0.649291800309805,0.103343754943537  
"Stfa3",0.625009877263103,0.169160961181024,3.10580880606035,0.0544659  
931580274,0.956563901883757,NA,NA  
"Klhl5",2195.44630258849,-0.32497001571147,0.116339306680088,-2.793295  
10364953,0.00521740704729082,0.0205513136581973,-1.26245340103466  
"Zkscan4",129.169305138293,-0.796654967794444,0.198361975342329,-4.016  
16774797485,5.91521589954975e-05,0.000659433273924648,-5.8348043642004  
9  
"Afp",54.5147619098077,1.51706562442957,0.465305025071838,3.2603680224  
5011,0.00111267736427714,0.00639215770438293,7.665252295252  
"Kcnmb4",28.2677173054396,-1.51511874100953,0.445633099661027,-3.39992  
415770285,0.0006740454641188,0.00433604040230563,-8.24344849631135  
"Olfr1346",1.64649868079026,-0.474976331789551,1.46592898870217,-0.324  
010463978927,0.745930112119722,0.834806879332208,-0.0857592865705614  
"Zfp174",148.542144547518,-0.0978264139906319,0.232172154753039,-0.421  
35291415411,0.673497396663862,0.779418888440524,-0.0243789930862298  
"Miga1",1472.4038866153,0.476921206002687,0.213964197752966,2.22897667  
465526,0.0258154568007949,0.0702217880443498,1.26674881524238  
"9130008F23Rik",297.286444720818,-0.56453435410511,0.222839064167797,-  
2.53337248661221,0.0112970834397268,0.0373023764450117,-1.856583138288  
89  
"Gm9959",2.59966396986309,-0.635297447565001,1.05530727789996,-0.60200  
2337015274,0.54717258176574,0.676940654407375,-0.247875065794022  
"Nt5c1a",4.21209914879407,-0.531970394492585,0.822392696524004,-0.6468  
56905151343,0.517724559124754,0.651097854704012,-0.228266013902975  
"Lmntd1",81.8622028617223,-1.36487649093464,0.581567435931815,-2.34689

290803871,0.0189306949923761,0.0551240577899266,-3.95564278618504  
"Zfp647",133.993339129599,-0.467585301595812,0.243463220621055,-1.9205  
5826914242,0.0547874204716691,0.124547641874385,-0.974011497700453  
"Nyap2",0.737060880139507,-2.37720539583195,2.07115579946241,-1.147767  
53948157,0.251064541014145,NA,NA  
"Kbtbd13",28.410300209859,-1.75976453209099,0.442654155020101,-3.97548  
404806249,7.02362519748395e-05,0.000752454088464517,-12.6565266870027  
"Sec14l3",192.196966799338,2.27301852918849,0.787701255571346,2.885635  
27493655,NA,NA,NA  
"Agtr1b",5.96649051554543,-0.103081203373742,0.710876879615172,-0.1450  
05705389581,0.884706367154542,0.928068259900966,-0.00769501110752671  
"AV320801",0.161595369035782,0.4.78471990595931,0,1,NA,NA  
"Naaladl1",12.1365108968066,0.361438426466714,0.549080289331414,0.6582  
61521109815,0.510370098958728,0.644674539355874,0.158674967827464  
"Lrtm2",161.221306676186,0.586007785121042,0.411322057849668,1.4246933  
1254591,0.154245873073103,0.273855949114857,0.758969766705842  
"Agap1",3062.25654952611,0.411071874484995,0.17281029666637,2.37874641  
971489,0.0173716216534993,0.0516093065671079,1.21843893086593  
"Cntn1",338.253871973909,0.282486505125749,0.412671941196918,0.6845304  
39133862,0.493640275027331,0.629822215474011,0.130598510506511  
"Ep300",2886.43524409132,-0.0229495104839012,0.203765878951338,-0.1126  
26856871271,0.910326391814783,0.945075737626967,-0.00129642264512638  
"Gabrg3",38.90282696668,-0.820913005001302,0.728264776170794,-1.127217  
78103515,0.259650414446821,0.400907806531843,-0.750334013634437  
"Smyd1",51.5238935851836,-0.596206688608984,0.281088834464214,-2.12106  
144217866,0.0339166321821769,0.0864226992012658,-1.45981500767772  
"Sprr2e",0.444298480794803,-2.00300349116891,3.08005446449912,-0.65031  
4309131751,0.515489216029,NA,NA  
"Olfr420",18.7002314809008,0.586766409261365,0.392500750900544,1.49494  
340562433,0.134929212880302,0.247051346862629,0.820392784076538  
"Commd5",746.123384406682,0.481707060561057,0.172337346497788,2.795140  
28938144,0.00518771977046094,0.0204550374286041,1.87361218354687  
"Pdlm1",900.752626654608,-1.56422258343718,0.309109565750547,-5.06041  
467736236,4.18345634617891e-07,1.37785526753034e-05,-17.5074006643774  
"Nfic",7037.9105573967,0.762702792665522,0.346593960803015,2.200565730  
85819,0.0277667818531923,0.0741030266320207,1.98478064011769  
"Ddx17",25765.6766218952,-0.118797067734113,0.140512807286313,-0.84545  
3663821898,0.397857593159467,0.542287826034483,-0.0726988604246613  
"Smyd3",476.882063316553,0.221685190218047,0.31752672862953,0.69816229  
699735,0.485075702268423,0.622441990314558,0.105102022355909  
"Rab39",40.1390633152413,-1.00970892173238,0.464005618601168,-2.176070  
46392312,0.0295499920627466,0.0777866538732866,-2.57857990919188  
"Gabra5",0.255569238715336,0.372431776565014,3.99923617985339,0.093125  
72696786,0.925803679079472,NA,NA  
"Olfr354",50.4732214496376,0.37392726953373,0.299171937807681,1.249874  
1435238,0.211345526090734,0.345302727622587,0.397609495213601  
"Gm8430",4.66370722097137,1.26447924206387,1.06577147958288,1.18644499  
903371,0.235446609915077,0.373321785811512,1.24590977603386  
"Spink6",1.59415649271101,0,3.16544989769921,0,1,1,0  
"Zfp819",2.06012092373774,-2.02652346606649,1.38113701588668,-1.467286

33202657,0.142298180253356,0.25742530326405,-2.75004439546217  
"Phxr2",0.172325363106324,-1.42169013425738,4.76762349444656,-0.298196  
813551531,0.765552953647034,NA,NA  
"Arntl",691.513363304134,-2.07235797421731,0.16765094230148,-12.361147  
1893231,4.240613305824e-35,4.13417391184782e-31,-144.983926113678  
"Cgrrf1",1373.62513499073,0.672472145372691,0.209298192058367,3.212985  
92577024,0.00131362726570717,0.00724147707852937,3.3138957111413  
"Sugct",3392.18036720146,1.98989215441872,0.606892378981351,3.27882211  
630122,0.00104241321520902,0.00607259422472229,10.1563486268106  
"Klf2",2684.26743937095,-0.388027553093003,0.187285566896281,-2.071849  
74007043,0.0382794563465864,0.0948209855101526,-0.91410154549347  
"Zfp78",125.760549198656,0.472769771699132,0.289866943844062,1.6309889  
1315274,0.102892658915179,0.20162824759077,0.75706024622948  
"Ifng",27.01111959284,-0.709634242793514,0.636288514867414,-1.11527117  
99951,0.264734231614259,0.406550425585528,-0.638704390960149  
"C1ra",2603.67842093651,-1.44003102483469,0.250433464534632,-5.7501541  
4777186,8.91621184355298e-09,7.24367910523317e-07,-20.359110258364  
"Cstl1",0.320285278254356,2.17908760996114,4.70929709902183,0.46272035  
1708911,0.643564828478562,NA,NA  
"Fam72a",40.3896566808477,-0.382008127089514,0.282563069690748,-1.3519  
393298905,0.176394724514855,0.302839159865339,-0.456329122298841  
"Klk15",0.873074129025028,1.56664681629844,1.72459701994527,0.90841326  
8827378,0.363659917936811,NA,NA  
"Actbl2",1.14372199522911,-0.818600638732389,1.90704224802036,-0.42925  
1444000336,0.66774024877969,NA,NA  
"Fev",0.243455786905374,-0.599306271643202,4.78471990596188,-0.1252542  
01587945,0.90032230840203,NA,NA  
"Gm12830",0.133767146871686,-0.546530893334942,4.78471990596623,-0.114  
22421877892,0.909060053743706,NA,NA  
"Sertad3",440.487026396885,0.0939906345184482,0.152103537040368,0.6179  
38519690723,0.536615866190636,0.66817857372178,0.0378970064721185  
"Zfp811",121.913676983395,0.130810648794886,0.246055561951796,0.531630  
529939056,0.594981915432643,0.717703377079044,0.0433897508170592  
"Ankrd17",7159.38679551083,1.03743484346628,0.337871011123096,3.070505  
63473264,0.00213696653966863,0.0105112445990058,4.72583698548264  
"Foxd2",240.450325438375,-0.482748138779131,0.346064115189412,-1.39496  
734157168,0.163025688089799,0.285287638339159,-0.605490401427099  
"Pld5",3.28539156749824,0.611900422216189,1.02034363231483,0.599700339  
020086,0.548705962273784,0.678505127626474,0.237333681810009  
"9430025C20Rik",11.9012683356116,-0.119280295780595,0.553275080523358,  
-0.215589496038326,0.829307744217042,0.891096792502143,-0.013753283365  
1458  
"Zfp935",0.108229817038987,-0.909962624367568,4.78339755770097,-0.1902  
33534509919,0.849126134161093,NA,NA  
"Wdr86",367.859133682749,-0.344643595054458,0.363115471689852,-0.94912  
9469616288,0.342554767772562,0.48711751319603,-0.24788486604362  
"Kcmf1",3497.10105557254,-0.249430751961068,0.249710366296492,-0.99888  
02453836,0.317852706929569,0.462913958747589,-0.192115076248373  
"Zfp101",1044.36105764201,0.608689156188583,0.154280709843322,3.945335  
46550785,7.96883353150566e-05,0.00082955854883768,4.31841635458197

"Ntrk2",830.388736319966,-3.54887902843796,0.768794783074773,-4.616159  
09286522,3.90907321168926e-06,8.23100534357637e-05,-33.3772686643781  
"Tmem245",4524.35732922728,0.23207917783403,0.207681185947815,1.117478  
10363691,0.263789956711438,0.405702492150625,0.209366787608268  
"Adh7",523.537094872505,-2.0349949190471,0.723636844532584,-2.81217703  
938438,0.00492074111433397,0.019628602751081,-7.9990917937717  
"Mrfap1",17279.9380194694,0.0155655060315392,0.188061628239099,0.08276  
8112651611,0.934035924520252,0.958802786298719,0.000654838821443223  
"Zfp93",324.701686434749,0.532592700917336,0.198839392953652,2.6785069  
7493066,0.00739511919424283,0.026853212403408,1.92658476403478  
"Them7",3258.06885435969,2.11385119431825,0.710514885785113,2.97509768  
846357,0.00292895258631903,0.0132810970995461,9.13482514187003  
"Pgbd1",193.674844582348,0.256039620896844,0.199902475798694,1.2808226  
6051913,0.2002559627421,0.331769119002929,0.282492604397436  
"Sec23ip",1462.8208806132,-0.275997873728861,0.136623539079718,-2.0201  
3412613927,0.0433694768972401,0.104410181570859,-0.623597346934464  
"Tead1",3885.75216010961,0.0524496366902437,0.214202633528455,0.244859  
90590436,0.806564907214012,0.876953246019005,0.00688672118002089  
"Tns1",39951.4129084401,0.755440602750707,0.264005350107181,2.86145944  
559083,0.0042169545007438,0.017453232616324,3.05819761138834  
"Fat2",403.728832529308,-3.56160701097332,0.807740682231968,-4.4093445  
9451987,1.03683930851043e-05,0.000176068399660679,-30.7888033223345  
"Snupn",499.543008425163,-0.0666482643141793,0.170901364967407,-0.3899  
80877723767,0.696550687050574,0.797506851713595,-0.0150801597190648  
"Zfp457",74.4327076548948,0.443739561566157,0.222545817149608,1.993924  
51967699,0.0461603038965857,0.109240636651976,0.982529093204361  
"Prl2c5",0.277425164135561,1.60101573119522,3.85332092994256,0.4154898  
48964926,0.677783344714188,NA,NA  
"Slc6a2",17.682504076627,-1.10988320749599,1.61587493667114,-0.6868620  
72248276,0.492169649587855,0.628648793165018,-0.515188401552563  
"Stam2",1363.43212305338,-0.29233182962881,0.155993268430263,-1.874002  
85006207,0.0609300322892037,0.135124405092686,-0.585119523172247  
"Fut9",9301.88943614404,2.15109384658386,0.60673913740301,3.5453355717  
1054,0.000392113543805872,0.00285169929203788,12.6050662382674  
"Rnf212",0.268570282422638,2.78587384602754,4.71560524763364,0.5907775  
77793547,0.554669460441736,NA,NA  
"Fbxo6",1296.73227501094,-0.0620980164834134,0.141540886561135,-0.4387  
2846915221,0.660858296087449,0.769692076764415,-0.0162550714138823  
"Map6",265.33586457875,-2.14272338631555,0.512914463930808,-4.17754525  
753557,2.94672044324152e-05,0.000384843673811732,-16.8475340621081  
"Nell1",4.01881940768505,-3.07919268172254,1.39828946967978,-2.2021139  
0308739,0.027657263642439,0.0739626013578764,-8.01882034301393  
"H2-  
Q5",788.732960243192,-1.31003022540344,0.335033500755442,-3.9101469627  
6506,9.22399835090299e-05,0.000927537492758672,-9.14791137980799  
"Atp10b",453.527218265013,-1.31400548625207,0.457701085290732,-2.87088  
129891021,0.00409329199543425,0.0170864926840028,-5.34730200239928  
"Pcdh9",158.545701223325,-0.744475559771772,0.473140300467764,-1.57347  
737877276,0.115608322256791,0.21997961036039,-1.12730009264201  
"Nap1l5",149.437439989153,0.811254555598683,0.34768870358171,2.3332784

3913695,0.0196335363007273,0.0566377704973489,2.32917607485407  
"Maf",16797.0085357779,1.16357404980177,0.373982293210796,3.1113078638  
3492,0.00186260640544576,0.00944773665280473,5.42455903456978  
"Srsf11",15301.4489787444,0.518424645837972,0.258378667695529,2.006452  
97253749,0.0448079414158497,0.106896518013733,1.15914257263035  
"Cd47",9452.44831948722,-0.128274387409714,0.140512831181831,-0.912901  
59290663,0.36129429969299,0.506180660732479,-0.0873371093195381  
"Gm7353",1.62239356528916,-3.61398961953465,2.30593005175584,-1.567258  
99676913,0.117054165385848,0.22225359009575,-5.43521000066495  
"Alk",13.310044656165,3.63834697378026,0.831107027676856,4.37771171776  
795,1.19931838388185e-05,0.000195898824286807,31.0638871412695  
"Zfp458",179.400873828637,-0.0376660131380967,0.217773376839933,-0.172  
959678013267,0.86268312216592,0.913269384080308,-0.00341722599599559  
"Soga1",451.691782301596,-0.67048097710764,0.311789854174476,-2.150425  
89786274,0.0315215416460993,0.0815994449038295,-1.68018028550807  
"Ano5",226.819224016672,-0.526610545406821,0.598231050206584,-0.880279  
526154601,0.378707901049206,0.523505611815485,-0.340826309800516  
"Pprc1",1090.57007467821,-0.268359967047312,0.193004069313987,-1.39043  
683379926,0.164396267972977,0.287012776889152,-0.334974571320696  
"Epm2a",445.392860316687,-0.074587621356933,0.378543571640942,-0.19703  
840441301,0.84379748447429,0.899917269871446,-0.00786544683355808  
"Gm9974",19.0196413961847,0.621103728942466,0.411523014763664,1.509280  
6639239,0.131227073921972,0.24172560107044,0.881937529340463  
"Gucy2g",36.3463226187567,-0.621120731368565,0.74878515670245,-0.82950  
4599295074,0.406818935328853,0.550729403668818,-0.370505777708103  
"Cpsf6",3368.15472456004,-0.348378335898002,0.0924601804393138,-3.7678  
7428104426,0.000164643577979301,0.00145985469915435,-2.27470790589307  
"Zcchc24",1676.73197457026,-1.74165478835687,0.315053693618016,-5.5281  
2051925514,3.23679671113622e-08,1.94619501646229e-06,-22.9021236573138  
"Epha6",8.51081948648446,-0.457128411569614,0.745097675275135,-0.61351  
4746775736,0.539536035012465,0.670397247685001,-0.182798719573519  
"Lair1",574.139024585429,-1.17722611607443,0.516270819694814,-2.280249  
18543785,0.0225929136933303,0.0632562652487873,-3.24980462307326  
"Timd4",9.35334053992145,-2.72060143194192,0.768976245704805,-3.537952  
50131342,0.000403242590369408,0.00291093077638753,-15.8863600440241  
"Kxd1",2284.13116125102,0.352564572740197,0.263000487291119,1.34054722  
244654,0.180067502599655,0.307573908514067,0.415687687207918  
"4930502E18Rik",28.6405631959229,2.06022643902129,0.682070028746728,3.  
02054972684676,0.00252316272626874,0.0119149011471998,9.12673197487437  
"Zfp459",88.2000876366496,0.0120852184825063,0.309096188305837,0.03909  
85684706941,0.968811802292984,0.980732699294357,0.00023512196601762  
"Spink5",1.10930247376288,0.957194047304539,1.3147862887736,0.72802253  
5280153,0.466599791508768,NA,NA  
"Unc80",3.96319986514656,-1.70991668714196,1.6714064587799,-1.02304061  
238951,0.3062886441587,0.450760277440248,-1.36249515873091  
"Olfr305",0.862079785797724,2.92389887133546,1.88888454966079,1.547950  
01730547,0.121634330946951,NA,NA  
"Tcp10b",42.9612223652468,0.483621468779369,0.362466496098336,1.334251  
50733977,0.182121444200922,0.310249719326935,0.566019811107651  
"Cdca7",239.001615487477,-1.44953833327493,0.352856617320996,-4.108009

49201493,3.99083706538288e-05,0.000487089909119285,-11.0557184980712  
"B4galnt4",87.7085365977006,-0.535152416619791,0.505509065973964,-1.05  
864059151682,0.289763493230938,0.433500237168483,-0.447314069981485  
"Hmcn2",416.135610698922,1.68984627762971,0.399926266077135,4.22539458  
136961,2.38522465657863e-05,0.000329603900453367,13.5485434977222  
"Zfp580",346.11484174807,-0.310586179078898,0.161233991931673,-1.92630  
707307995,0.0540660427788588,0.123353580868499,-0.649963823144052  
"Dach1",1161.8057751916,-0.0236842435280369,0.176430139565966,-0.13424  
148269849,0.893211624306521,0.93382853574598,-0.00162148105833154  
"Klhl25",766.748362063142,-1.30451842011886,0.244391016832,-5.33783294  
095304,9.4064066946699e-08,4.34611653394962e-06,-16.1058816655105  
"Gpc3",2452.92856320524,-1.31504872792332,0.33947083543467,-3.87381945  
856848,0.000107142799265654,0.00104558073077164,-9.02541984312152  
"Mettl4",836.699374385375,-0.00748464135583999,0.150800469679662,-0.04  
96327456521802,0.960415051523341,0.975931450625501,-0.0001823477938053  
69  
"Zzef1",2942.49208249955,0.0967557835113618,0.130263686670163,0.742768  
656289871,0.457621754957462,0.597444061650789,0.0498383835625793  
"Kbtbd11",2255.22150910766,0.0971273646709877,0.232025369533961,0.4186  
06658685965,0.675503622400392,0.781149969133672,0.0239893057482635  
"Gm5069",115.218596717606,0.583525426770787,0.248741954575707,2.345906  
73602343,0.0189808562799128,0.0552124027667821,1.69022088180049  
"Cope",4378.44509246603,0.235978940150693,0.112661246568531,2.09458839  
963348,0.0362075973102261,0.0907540470953579,0.566255586473556  
"Gja6",5.54493365014897,-0.429685838776169,0.64280632761073,-0.6684530  
32149332,0.5038444532435,0.638778613042673,-0.192584051306045  
"Tmem191c",943.541968488486,0.199034360342038,0.187177925426446,1.0633  
4312600473,0.287626374536987,0.431660949101152,0.167211719580256  
"Klhl26",1256.94923025318,-0.517179979777444,0.175261863647971,-2.9508  
9855267227,0.00316850966651686,0.0140702147090533,-2.20509777037412  
"Slain1",287.316081160872,0.21924866400575,0.447644201869841,0.4897833  
2141896,0.62428723409822,0.741734001995496,0.0655037367632447  
"Ubl7",1530.20560642596,0.233651700751073,0.139065993312822,1.68014979  
927901,0.092928173767064,0.186632904748982,0.392210471057696  
"Rras2",2083.32006418337,-0.263619984400998,0.173674387412989,-1.51789  
78796345,0.129040144589072,0.238825319335333,-0.377509848158336  
"Paqr3",188.17678196248,-0.548987727752661,0.281194784182036,-1.952339  
65434175,0.050897892434646,0.118007936494353,-1.1731886398607  
"Ces2a",5.75256273419465,0.0412352839755194,0.678224529418309,0.060798  
8684969645,0.951519391464719,0.969930765084564,0.00125893739328122  
"Nap1l3",129.726740357082,0.198242917289958,0.176212162862454,1.125024  
02824884,0.260578852361702,0.401959372100354,0.180679439312565  
"Ghr",17547.5260616617,1.09999656695071,0.49385975910261,2.22734601610  
284,0.0259241573479995,0.0703996128093726,2.91891515744206  
"Rtl6",490.333214506775,-0.37869186567798,0.218668503221146,-1.7318080  
1121137,0.0833077513011276,0.171415632637124,-0.667885237625143  
"Gsdc4",15.3894810525886,-2.15160692363805,1.18434654537784,-1.816703  
84570728,0.0692624725800304,0.148944489948763,-4.09705029964343  
"Gemin6",270.798163063533,0.117915157337014,0.120859449813328,0.975638  
706937172,0.329243536050686,0.474028765207942,0.0880221642500808



"Nkain3",50.5470175684916,0.916847641018482,0.591517224482161,1.549993  
1414865,0.12114316217957,0.228217331031619,1.35460287141892  
"Eef1d",7068.79737584502,0.307154363584813,0.175126066627,1.7539043130  
5135,0.0794469044424932,0.165479728962689,0.552542004277398  
"Gm7936",0.088158751752442,-0.0671475021926688,4.78471990596623,-0.014  
0337372954559,0.988803065214312,NA,NA  
"Myh8",26.3646889225518,0.272429601243069,0.388606581288723,0.70104217  
0566488,0.483276698190486,0.620828110509823,0.129867471524199  
"Usp26",0.463154290068376,0,4.78471990594789,0,1,NA,NA  
"Abcd2",1126.84511327397,-3.72552389453585,1.19161358187137,-3.1264530  
3075944,0.00176928764365047,0.0091046636252037,-17.506119465351  
"Ftdc",0.185015883193048,0,4.78471990595786,0,1,NA,NA  
"Gm5160",0.720632436308967,-0.747203655793053,2.32176426809532,-0.3218  
2580551385,0.747584663521559,NA,NA  
"Tcf7l1",824.276100788444,-0.663165372281858,0.2538322177633,-2.612613  
08011051,0.00898529620817601,0.0311458320830251,-2.30057031053344  
"Fmnl1",3497.96755105285,0.854113475152657,0.320073844051891,2.6684888  
2226748,0.00761933137542037,0.0274402887251471,3.07117251030453  
"Dnaaf3",257.292579669682,-1.178958503373,0.407692271230155,-2.8917852  
6690157,0.00383059661160868,0.0162508643892833,-4.85684827148873  
"Clnd17",2.27527086699315,0.24375552975372,1.23284867314395,0.19771731  
5242029,0.843266241544704,0.899650097266286,0.0257769942095389  
"Mta3",1193.00834835054,-0.29549201466767,0.122354697347245,-2.4150443  
0213299,0.0157332959186509,0.047835303886146,-0.898293164763982  
"Olfr967",12.9197142739169,0.267084961722744,0.612599151095802,0.43598  
6503156247,0.662846522096756,0.771313627379049,0.0693513367500141  
"Tescl",3.52501041131364,1.02618040026686,0.754296865026413,1.36044632  
80262,0.17368872644029,0.299516302180497,1.23714916692269  
"Gsdmc3",564.593338378659,-0.964943724906008,0.76376966106311,-1.26339  
624902471,0.206446811501267,0.339487216888901,-1.04244702590637  
"Zfp1",841.734688776092,0.335829866654543,0.204132981859217,1.64515240  
79835,0.0999383851963478,0.197226582445181,0.545186892796249  
"Ellob",7810.8075595159,0.460384641022511,0.151971566534191,3.029413011  
40652,0.00245029455929463,0.0116498032960562,2.04984695351158  
"Rnf181",9719.58679020754,0.953539893671838,0.180878052840481,5.271727  
98854033,1.35145272328203e-07,5.76600113753895e-06,11.5030587931334  
"Izumo4",1309.56783515485,0.157807343596927,0.187093438588209,0.843468  
080910411,0.398966709986117,0.543264776830997,0.0962874856546051  
"Tafa3",53.6088468833448,-0.201044907073263,0.343304430880866,-0.58561  
698885567,0.558132929164075,0.686981620657858,-0.0754818560319342  
"Per2",1349.32604372154,2.50897087272891,0.291996287717427,8.592475241  
18154,8.51155122985932e-18,1.8439802875533e-14,79.3443594224823  
"Gm9985",0.922949598629343,-1.00549602858848,1.66869350710314,-0.60256  
4835488587,0.546798219370392,NA,NA  
"Abhd16b",0.736685081891134,-3.11100137015002,2.0557288676634,-1.51333  
253090233,0.130195213438728,NA,NA  
"Fancm",345.711207231964,0.79780871868759,0.351338889676787,2.27076689  
239137,0.0231610931595429,0.0644767267882307,2.18715346600038  
"Oosp2",0.338231070208175,-1.30597617816454,3.84056461933811,-0.340047  
963674053,0.733820408011076,NA,NA

"Ppp4r1l-  
ps",5087.95958005251,0.653071094059535,0.256210807299645,2.54895997925  
549,0.0108044698352768,0.0360119068774339,2.17074669849182  
"Tmem69",751.828596710289,0.211244843330437,0.241341606856885,0.875293  
929138811,0.381413996488806,0.526350775252228,0.135574282018124  
"Tmem150a",3894.09184608295,1.44200937141195,0.375203446522528,3.84327  
325555462,0.000121404165068911,0.00115752489511668,9.75010492804972  
"Zfp277",1058.67638850205,-0.00892290379608933,0.127240489290831,-0.07  
01262927062032,0.944093139660098,0.965564196694897,-0.0003126825400499  
44  
"Aasdh",788.952664189407,0.482326320201171,0.228360218101952,2.1121293  
5514816,0.034675355769793,0.0878189717732145,1.17324802874961  
"Gm14137",8.91226354804109,-2.22266879682596,1.02237331000374,-2.17402  
858141692,0.02970298879157,0.0780580286257599,-5.66847839411803  
"Fto",3075.8337285631,-0.108125117385324,0.169930551095716,-0.63629004  
1361786,0.524587394637226,0.657352507752997,-0.0453622562986738  
"Krt28",6.51707300148795,0.569885502365517,0.627389581433709,0.9083439  
05015471,0.363696552718481,0.508632576739703,0.385259340701899  
"Emc7",3866.81899102104,0.250349007687074,0.264612255064002,0.94609755  
555925,0.344098830451168,0.488655425792926,0.179274345753147  
"Prr18",47.3453588032415,-0.326179374883158,0.411656382491446,-0.79235  
8357008919,0.428151753509267,0.570974076207172,-0.182794663302722  
"Skint4",1.21577540790422,-1.31987236104243,1.50593198023585,-0.876448  
855834595,0.380786068532635,NA,NA  
"Triqk",242.083688866385,-0.602578278595892,0.420735030304588,-1.43220  
372727144,0.152085525346982,0.270982689684315,-0.786786660736288  
"Gm9988",0.349308317216858,0.388349400633875,3.87518916366232,0.100214  
308058928,0.92017418701048,NA,NA  
"Clndn23",161.64014278478,-1.56451743375664,0.430850794082695,-3.631227  
9221571,0.000282075930210413,0.00219820802847427,-9.57502314562518  
"Fut2",54.4967089464769,-0.430319025103991,0.819015090534942,-0.525410  
37409082,0.599297943342149,0.721152069689338,-0.140673548039101  
"Irs1",1442.08919232143,-1.04131350478311,0.502416614465916,-2.0726096  
1282114,0.0382086256980034,0.0946983327646714,-2.45443724788096  
"Zkscan5",716.164866922692,0.269909710229086,0.148853476481259,1.81325  
768540628,0.0697920864145738,0.149736586808028,0.51252550724684  
"Nod2",227.680716022082,-0.603142254384796,0.315831184136729,-1.909698  
23335648,0.0561720785817137,0.127132117026843,-1.24399805406083  
"9330182L06Rik",12.8479107733655,-0.552679394828153,0.456540697348056,  
-1.21058078291496,0.226056112988799,0.362172727284765,-0.5613200031450  
25  
"A430033K04Rik",526.130558269638,0.272858287894749,0.224839582678652,1  
.21356873484651,0.224912452136434,0.360973191529306,0.278029384957607  
"Zfp709",309.516376838224,-0.193583457618332,0.191495175296915,-1.0109  
051432663,0.312061832138272,0.457189897930565,-0.151509340328465  
"Clca3a1",1248.60350347286,-0.667297282364445,0.246737759974858,-2.704  
47977817599,0.00684114334849856,0.0253301581862941,-2.45282437166643  
"Cyp3a11",13.069014881547,1.38985576930857,0.993306094117053,1.3992220  
2988597,0.16174641234607,0.283685486005547,1.751064131728  
"Rgs9bp",41.0869767183953,-0.514228539375166,0.332098103076863,-1.5484

2359715662,0.121520343536917,0.228817349906597,-0.758400289861981  
"Mia3",3890.54129046473,0.0828901683002911,0.101699290662781,0.8150515  
87480013,0.415042781634921,0.558411824200779,0.0482966654877373  
"S100a8",44.2248159090169,-0.737385066151559,0.633281315367443,-1.1643  
8784511385,0.244266871167755,0.383409712931,-0.706895015862688  
"Sag",143.277791626074,0.0439355243984027,0.390396685781559,0.11254072  
0755468,0.91039468430989,0.945075737626967,0.00248192695855312  
"Otulinl",1166.00497929693,-0.852657375118703,0.358817345550899,-2.376  
29921098046,0.0174872759803823,0.0518738638468727,-2.52296218612707  
"S100a9",49.4953978806267,-0.571791976923439,0.56662452173222,-1.00911  
971683721,0.312917223123546,0.458052553788506,-0.446438796707961  
"Grik2",15.4880785479163,-0.564509430701852,0.650876784234651,-0.86730  
6139003934,0.385774293928096,0.530107436237116,-0.35828035209473  
"Eif3b",6658.04147424304,0.0288393481937203,0.172936760184988,0.166762  
394316114,0.867557009260761,0.916935525074063,0.00250089405487274  
"Lipm",0.896688939136288,-3.42609937421599,2.11815110233604,-1.6174952  
6293826,0.105771417387758,NA,NA  
"St3gal5",498.751414507791,-0.960738088747021,0.177592368625193,-5.409  
79376639008,6.30973687655451e-08,3.2206086287712e-06,-12.1494364192358  
"H2-  
T22",6166.86641273448,-0.267308502268732,0.227771375071339,-1.17358251  
090599,0.240562289745347,0.378875890586008,-0.259435356156987  
"Fez2",2457.28857863755,0.243618291822382,0.156555330815333,1.55611623  
413671,0.11968045533058,0.22609529290143,0.362211364102439  
"B4gal6",1821.90294795278,-0.018193518135544,0.176755881676796,-0.102  
930199340192,0.918018369381635,0.949731665874555,-0.00093834509364725  
"Ticam2",132.365711520677,-1.5555805547898,0.395490189550564,-3.933297  
45184721,8.37884459328967e-05,0.000861205650395161,-10.9780076729079  
"Pgm3",840.131036307134,1.11530635018213,0.184118043670666,6.057561377  
18413,1.38200617145394e-09,2.0411243243503e-07,17.1808424643626  
"Unc93a2",6.37562312991382,-1.1933920484975,1.05997824980849,-1.125864  
65685793,0.260222811278218,0.401632579300459,-1.08863321857126  
"Trim34a",1049.16859971491,-0.633380856885795,0.16159638614618,-3.9195  
2364771845,8.87241558654101e-05,0.000900904965479376,-4.44133673608313  
"Rdh9",59.7965880114271,1.28936926194014,0.887224899343012,1.453260907  
00894,0.146151327041642,0.262810898704964,1.72301060484622  
"Socs6",1520.64561331948,-0.180627619127002,0.134651387014945,-1.34144  
640565012,0.179775559404479,0.307201430838673,-0.213186040098883  
"Nanos3",13.0191290221879,-0.337243371514828,0.606985240608163,-0.5556  
03907562777,0.578481659594664,0.703434406724982,-0.118635690841427  
"Car10",1.27536641176016,0.10766704353332,1.49954796954957,0.071799666  
1124889,0.942761338539948,NA,NA  
"Cndp1",1340.26063771501,2.36513085515359,0.692753648117163,3.41410090  
236519,0.000639928713397709,0.0041716248926207,12.9596154520172  
"Cnot10",2746.31727826726,0.0800600372371977,0.0812894508193155,0.9848  
76099300381,0.324684934704205,0.469567338441076,0.0605208699438045  
"Col8a2",208.874928997472,-2.16530838584542,0.478611557055217,-4.52414  
563318956,6.06399605570981e-06,0.000115127356469552,-19.6382028994232  
"Snx32",892.489704112165,0.0894471943675675,0.194904553193553,0.458928  
19281005,0.646285732423194,0.758793232419307,0.0246897476726814

"Cfl1",24217.524972791,-0.229649890091448,0.151024596759749,-1.5206125  
0298703,0.128357107353851,0.237967754985774,-0.329689997659616  
"Tas2r135",0.424788342086555,-2.21772373223066,3.7901173650945,-0.5851  
33260688714,0.5584581159467,NA,NA  
"Pgpep1",7304.11909804416,1.24780179661177,0.325310484460311,3.8357257  
3346928,0.000125194057617157,0.00118496783272783,8.40773798108712  
"Npm3",1899.60774551004,0.549147867697783,0.15924569071209,3.448431572  
88709,0.000563852317039704,0.00378841918595456,3.06194222174106  
"R3hdm1",2800.12966400662,0.178158683164721,0.119585678746629,1.489799  
48963783,0.136276965374416,0.248896640624183,0.247768410317587  
"Pard6g",370.64610181457,-1.32239768544891,0.301896303228063,-4.380304  
33400149,1.18513670301347e-05,0.000194183154918963,-11.3021478649218  
"Lrguk",83.9924481211634,-0.342084301567858,0.437054312651221,-0.78270  
4326820929,0.433800760802773,0.575939482100809,-0.188745933461115  
"Cebpg",3198.84158792601,-0.529191982729508,0.162361540066964,-3.25934  
320721057,0.00111670487047545,0.00640397398956772,-2.672862205928  
"Pla2g4a",723.9748622661,-0.982741490123678,0.243050094093898,-4.04337  
012823379,5.26883462825243e-05,0.000601301361596591,-7.28841805578896  
"Spock1",3.22562434609485,-0.208190327551299,0.947057048534108,-0.2198  
28708179242,0.826004560574271,0.88881525868841,-0.0245385347200735  
"Cars2",1956.57681967451,0.220250619562531,0.176193698867051,1.2500482  
1953777,0.211281933355616,0.345284419997578,0.234211600608793  
"Ncoa4",6000.10286452063,-0.0256072561542172,0.308582459178603,-0.0829  
835118379042,0.933864650037419,0.958753743692193,-0.00107860378816986  
"Kcnq3",25.5844717900213,0.46963742561097,0.396952457391373,1.18310749  
024519,0.236766549698284,0.374865950955513,0.460802033889208  
"Lrif1",1889.93998422852,0.329681864170073,0.199761970178216,1.6503735  
1141436,0.0988665653716575,0.195606320813453,0.537925811568231  
"Cep70",431.560874083772,-0.685871496508804,0.271612111476274,-2.52518  
745493688,0.011563658935011,0.0379593079863063,-2.24365064151185  
"Dennd1b",1202.03233387783,0.158266487460662,0.141999356614739,1.11455  
777852613,0.265039971849357,0.406877361713154,0.142320104026487  
"Prr9",0.131011944220674,-0.0671815383080447,4.7847199059609,-0.014040  
8507976295,0.988797390019919,NA,NA  
"Lman1l",2.77659574319669,0.337556606821782,1.12704628274277,0.2995055  
41156932,0.764554344737694,0.847582477467339,0.0558207659044606  
"Olfr1322",32.8815734469033,1.0282174779657,0.438220486763349,2.346347  
35030307,0.018958430246817,0.0551691409568523,2.97910747540678  
"Ms4a4b",658.694875893542,-1.29178851150943,0.784052374162976,-1.64757  
936341752,0.099439018047054,0.196482316730517,-2.10197610260358  
"Gsdlm2",1192.61189855157,-1.36438605852611,0.751792516385135,-1.81484  
389481094,0.0695479026245272,0.149356493874082,-2.59426992205388  
"Synpr",10.6704273997197,0.0996837233690347,0.821576589272127,0.121332  
234475363,0.903427889198051,0.940873677149001,0.00607536324138956  
"Zfp981",10.1582193870255,-0.595642772922845,0.556276058166979,-1.0707  
683068108,0.28427362069616,0.428343667413735,-0.505003481200778  
"Usp39",1114.3931064342,0.18896895828942,0.123842717611891,1.525878646  
18432,0.127040089622375,0.23613228479095,0.272750821859688  
"Sertm1",0.268545051258998,-0.546736304659809,4.78471990596152,-0.1142  
67149468583,0.909026022822586,NA,NA

"Tyw1",921.487372075887,0.17915924373486,0.187301881791671,0.956526661  
777652,0.338806220891544,0.483448026153174,0.130214992388669  
"Tcim",3646.03963428337,-0.835293607999305,0.293653134739397,-2.844490  
69048961,0.00444824856982355,0.0181523546702427,-3.34865448023298  
"Myh1",1.35111227903727,-2.62639997748652,2.54533617610428,-1.03184797  
440246,0.302143341087187,0.446722005254968,-2.11640245196003  
"Usp34",5140.98826319013,-0.0538881232000618,0.175059914858472,-0.3078  
26741739409,0.758214172019007,0.843190550734421,-0.00919128265021179  
"Fabp3-ps1",0.139896150021884,0,4.78471990596454,0,1,NA,NA  
"Actr3b",49.0250562729062,-1.18429138809569,0.348852421371827,-3.39482  
060476628,0.00068673582564375,0.00440025472507455,-6.42607503050461  
"Sftpb",0.951503292093337,0.441542616744184,3.04803978945137,0.1448611  
72177696,0.884820483113681,NA,NA  
"Taar1",0.309596332825244,-2.25430963064951,4.74320240876824,-0.475271  
64906187,0.6345933638997,NA,NA  
"Gpr50",1.129947969126,-1.2619867765973,1.42871130544942,-0.8833042559  
28963,0.377071904956743,NA,NA  
"AI987944",1069.85206971284,0.18299109285069,0.155891198973669,1.17383  
851080393,0.240459715435242,0.378817175930462,0.1776297421679  
"Lig1",804.864129473284,-0.448412666774149,0.278190729837419,-1.611889  
32153207,0.106986026313699,0.207357210841402,-0.705493171605495  
"Prss34",0.111744305215002,-0.934640000541444,4.78302050805112,-0.1954  
07901548444,0.845073631307147,NA,NA  
"Psenen-  
ps",7.54514066855168,0.554678284883682,2.00773469976782,0.276270706955  
37,0.782340153140586,0.859238906434695,0.0841492852746037  
"Adap1",1504.85813616866,-0.128413502206451,0.218680815649893,-0.58721  
8873428935,0.557056718339004,0.686350198683975,-0.0483306415430369  
"Uts2b",0.902919824962357,-2.19497878568664,2.03911239831052,-1.076438  
35009059,0.281731258749498,NA,NA  
"Slit3",519.487054018769,-1.59702502431889,0.28577354363364,-5.5884285  
2985113,2.29133643535623e-08,1.51445687513816e-06,-21.4008598666416  
"Tgoln1",11504.8688004226,0.18570208088127,0.266319346794366,0.6972909  
8962028,0.485620705766248,0.622772928170306,0.0879435487271708  
"Cyc1",0.402221757074881,1.53857809231199,3.11897444437761,0.493296152  
228979,0.621803346750228,NA,NA  
"Mok",396.575110700333,1.48783252129228,0.391474238164099,3.8005885860  
3259,0.000144352800150877,0.00132264609837491,9.86153387318304  
"Zbtb25",289.24653044287,-0.417891239191386,0.161800375564383,-2.58275  
815327203,0.00980140035194059,0.0332534424608954,-1.42233336159458  
"Med12l",368.512403734578,-0.784725613928301,0.308665563097728,-2.5423  
166940066,0.0110120345856438,0.0365530558990267,-2.59664959182783  
"Cd248",541.335372234684,-1.62698019353884,0.311932288084085,-5.215812  
0710488,1.83013654407232e-07,7.19435530974236e-06,-19.2670473395879  
"Chn1",594.663244874279,-0.792495031614142,0.2682473982653,-2.95434377  
645055,0.00313334749849799,0.0139646914159122,-3.38492314652291  
"Mettl7a2",4134.33509681495,2.68311324722903,1.03462912344664,2.593309  
22204357,0.00950572610476682,0.0325219595702305,9.19191598587218  
"Adgrf5",6334.51926126047,-0.634245464465787,0.220243269857138,-2.8797  
4958271003,0.00397991147569851,0.0167206020153349,-2.59477028744696

"Foxk1",1468.7283592495,-0.712093528553129,0.191490247724007,-3.718693  
44270452,0.000200255905319712,0.00169543623183836,-4.54302512251571  
"Cngb3",0.582163810786774,1.69425662525213,2.95115282480494,0.57409992  
8343805,0.56590018184614,NA,NA  
"Tmem154",525.317658404594,-2.31616920804142,0.451764757576575,-5.1269  
3646238845,2.94494847014012e-07,1.05527953607342e-05,-26.541260362616  
"Cebpb",2473.52845291343,-1.4775479276507,0.419544217884326,-3.5217930  
9037237,0.000428638553583845,0.00305914879860096,-8.55443892310359  
"Rab31",1326.01607585822,-1.26007930685023,0.276324049683052,-4.560150  
69370748,5.11169252643962e-06,0.000101082942069493,-11.5921867424514  
"Ptafr",509.44016394555,-1.32163140119241,0.378409918779595,-3.4925918  
5767325,0.000478357037553724,0.00333942195425081,-7.53588615237415  
"Ccdc18",93.3687962894755,0.0471328591757029,0.350947198407228,0.13430  
1853354622,0.893163887755748,0.93382853574598,0.00322683045747018  
"Pign",1351.84820874982,-0.082822476174209,0.14826687578655,-0.5586040  
42439277,0.576431980553251,0.701920602583696,-0.0293137717038126  
"Rlim",3141.10315480814,0.0594179750868066,0.100634113477995,0.5904357  
183988,0.554898569943716,0.68442638643488,0.0225297621943707  
"Ptprn2",6.0014500974659,-1.81851639597437,1.19767802002178,-1.5183683  
4739715,0.128921566464353,0.23871915507331,-2.60496563795579  
"Olfr324",1.94832040930528,1.62536629753328,1.10632283553678,1.4691609  
4048141,0.141789141787024,0.256671124924648,2.21043263494254  
"Mpz",47.7641069128329,-1.41534863579906,0.492877655961001,-2.87160235  
137753,0.00408396506557158,0.0170621707410574,-5.76173073589472  
"Zfp658",402.046492441913,-0.426561248608151,0.229753227037246,-1.8566  
0612522757,0.063367211859095,0.139074054122989,-0.84149815900399  
"Trnp1",69.9650562706105,-0.794654608008519,0.50099863683115,-1.586141  
25785803,0.112707269542598,0.215892164411197,-1.21818662894837  
"Drc3",243.168426631628,0.370650118518089,0.195595220556437,1.89498555  
978847,0.0580943147737676,0.130407891947838,0.755046949495409  
"Olfr90",2529.66202009165,0.408740181153278,0.323578108991943,1.263188  
60823634,0.206521405822102,0.339523977295054,0.441525520945948  
"Fry",1534.16670022127,-0.998413089438742,0.325362651793299,-3.0686161  
547301,0.0021505270890459,0.0105699463529662,-4.5425205231812  
"Chd9",64819.863652815,0.653673909459385,0.459325431250799,1.423117173  
54589,0.154702190713864,0.274491156114198,0.84509331714411  
"Ppp1r14b",3115.23119023911,-0.271883210419358,0.14160555132665,-1.920  
00389724968,0.0548574071357372,0.124692203815878,-0.566035544754182  
"Fkbp2",6469.18577697065,0.829090282885393,0.192152196715961,4.3147582  
8564662,1.59777628542586e-05,0.00024206248650531,6.90326657389905  
"Dsg3",5.54991227999312,-3.81508822465684,1.90927479264755,-1.99818708  
095263,0.0456963816228859,0.108432280501768,-8.47571233021345  
"Chst13",17.9738292072104,-0.0956597648594563,0.529743787607333,-0.180  
577417040638,0.856699283045226,0.908958079165033,-0.00913132753743628  
"Hoxb8",4036.15321648595,0.160088087982337,0.165717754132342,0.9660285  
87706364,0.334029876257093,0.478749965249985,0.117917173336671  
"Apol8",10.9223695695625,-1.59346023316923,0.891039500266282,-1.788316  
04288366,0.0737250329960897,0.156316952300756,-2.95725438549946  
"Them6",975.471067790843,0.131621727655695,0.198618844146489,0.6626849  
94574933,0.507532322056157,0.64208905518925,0.0583121462535143

"Retsat",6879.40133288781,1.41579272248356,0.562577128066686,2.5166197  
6971757,0.0118486621288507,0.0386588377155842,4.60554522621415  
"Prelid2",94.0026884136639,0.0791092603325242,0.240165358032244,0.3293  
94967620197,0.741857171017427,0.831876263309317,0.0145617658462837  
"Kdm5d",1444.87475824011,-0.23692328622207,0.180533936791334,-1.312347  
64185037,0.189402864271237,0.318716006395577,-0.270911077107038  
"Gpr173",122.882397301172,-0.364147918598858,0.354463270557252,-1.0273  
220072319,0.304268862973137,0.449010981465347,-0.291576127547076  
"4930465K10Rik",0.0840345516574662,-0.0625911708347296,4.7847199059662  
3,-0.0130814701936225,0.989562794578312,NA,NA  
"Ilrun",9253.05186326134,0.380158826717084,0.204557419019592,1.8584455  
5792265,0.0631057677962194,0.1386563286557,0.751101410966446  
"Elmod3",1302.80867655698,0.603499428252818,0.273510344183511,2.206495  
80934278,0.0273493033321587,0.0733906848844522,1.57631531673931  
"Ier5",2167.74720025184,-1.34398202489248,0.224105378748677,-5.9970984  
739268,2.0087426055764e-09,2.55989956362932e-07,-20.3991307011284  
"Gm13199",72.9210152810217,0.550500938820181,0.352590466009104,1.56130  
4096084,0.118452017608784,0.224252591449274,0.822989116751085  
"Nbeal2",3788.76585611514,-0.187782209274935,0.157195412684827,-1.1945  
7817545499,0.232251880389063,0.369458037352203,-0.186978146712205  
"Capg",3502.70507186448,-0.7449201008465,0.274224359325332,-2.71646217  
965177,0.00659837335653334,0.0246029701039033,-2.75984562258999  
"Nfil3",555.455318176026,-1.49902357891999,0.241300610662094,-6.212265  
99802993,5.22259203309129e-10,9.62463073877169e-08,-24.218757438154  
"Dnah9",14.3679204431739,1.07947698995043,0.68882776645815,1.567121771  
96477,0.117086231065447,0.222292827002346,1.6232740223381  
"Grm7",39.2597791097435,-0.113981856662845,0.720731914306051,-0.158147  
369917136,0.874340674450164,0.92155762313797,-0.00931117467198363  
"Hmga2",26.9930380543885,0.239094218312354,0.531594527950302,0.4497680  
20062664,0.652877719349704,0.763594501103844,0.0644881072472944  
"Cspp1",2435.03574692694,0.817522179574994,0.246403043752699,3.3178250  
0379944,0.000907213034966775,0.00546795664784611,4.25835064092632  
"Setd3",6454.25099653676,0.294316098041677,0.122423549825344,2.4040807  
3823675,0.0162131920216334,0.0490191995716868,0.887522916818473  
"Olfr667",55.2557701795926,0.870675136068283,0.299635522926255,2.90578  
075511618,0.0036633803627304,0.0157366358917201,3.61483750166226  
"Sts8sia3",0.472052177258172,0.837604227252054,4.6478941309882,0.180211  
554662492,0.85698648763076,NA,NA  
"Tsnax",3069.85918709569,-0.475569059427349,0.195941733994931,-2.42709  
426792993,0.0152203004978333,0.0466538939013918,-1.45761863670329  
"Olfr166",0.120255796082496,-0.0721642014173631,4.78471990596057,-0.01  
50822206598686,0.987966585208188,NA,NA  
"Zfp663",1.80345315467338,-1.0775469622419,2.33697724370526,-0.4610857  
74431185,0.644737067443221,0.757613652805877,-0.299107335006546  
"Ttc26",435.849222081467,0.52318215093289,0.249446390951219,2.09737310  
264474,0.0359605601930974,0.0903215200523899,1.25792845398132  
"Gm6851",42.0720821190541,1.02232318207401,4.34868089897177,0.23508811  
196419,0.814140345443105,0.881747956198947,0.128658378520947  
"Pcbp2",14555.0446231237,0.0291058434630277,0.121179552958061,0.240187  
744157638,0.810184714374466,0.878977384869427,0.0037545405814078

"Pou3f4",0.780563414931021,-1.03565340752148,3.22903688134133,-0.32073  
1365289106,0.74841397593435,NA,NA  
"Jakmip3",5.13924529573871,-2.90615702454261,1.18251578536636,-2.45760  
526878906,0.0139866812530831,0.0439433308205953,-9.0813175973799  
"Gulp1",673.556405984849,-1.00251025100158,0.18128864840953,-5.5299118  
8249645,3.20391685523598e-08,1.9400612063165e-06,-13.1858078426101  
"Gadl1",3.5344320816203,-0.0316574996782735,1.84496536922383,-0.017158  
8584839355,NA,NA,NA  
"Glipr1",406.164857593338,-1.11274251985141,0.405671775929971,-2.74296  
26261293,0.0060887615017836,0.0231060085172784,-4.19243836023354  
"H2bu2",73.0800426784429,0.0766877372445249,0.463485206389852,0.165458  
867267536,0.86858282271587,0.917572079824134,0.00659699672345413  
"Imp2l",380.302943086493,-1.6468588236897,0.657884374505782,-2.503264  
84031005,0.012305342474748,0.0397037179501302,-5.31327782354832  
"Usp13",201.782033671931,-0.637852135200856,0.404568093672802,-1.57662  
491228664,0.114881857030809,0.219044584189201,-0.96856570331536  
"Gm5620",2.427214354933,-2.64247766452031,1.40479489725711,-1.88104161  
659457,0.0599662579135989,0.133488080465732,-5.32127113748334  
"Vmn2r107",29.6714027804109,0.901987442755271,0.503921672261094,1.7899  
3580234019,0.0734642324202417,0.155865680492913,1.67657877901368  
"1700017N19Rik",0.10500178835157,-0.544048378937456,4.78471990596623,-  
0.113705376621746,0.90947135024012,NA,NA  
"Sipa1",2307.82033805093,-0.760611385959298,0.260836250574522,-2.91604  
937689437,0.00354494393805294,0.01535977282463,-3.17631568929964  
"Cep162",1102.60521070661,0.142763287109035,0.260278869044217,0.548501  
258028679,0.583347765688154,0.70747743580193,0.0494031702373884  
"Olfr394",4.675711388678,0.895508490234339,0.805278271045571,1.1120484  
9607033,0.266117299535879,0.40788893218698,0.803056522058506  
"Acdbd4",4619.50652933991,0.422272208620456,0.374543292655433,1.1274323  
072952,0.259559745953384,0.400799550692887,0.386080883468034  
"Commd7",1844.36665020464,-0.178474051287132,0.0861436969278918,-2.071  
81787701226,0.0382824288612125,0.0948209855101526,-0.420442839204632  
"Gm10015",0.0796095652383775,0,4.78471990596623,0,1,NA,NA  
"Mab21l1",1.26061513445923,1.07385034835739,1.22159253008055,0.8790577  
233528,0.379369978763332,NA,NA  
"Tatdn2",1748.22023812433,0.688086696703859,0.130944851504752,5.254782  
36674992,1.48199612097676e-07,6.24065568814102e-06,8.24632361854978  
"Jmjd6",2317.99462497076,0.220586472453165,0.127670847362928,1.7277747  
9753156,0.0840286074654002,0.172643813315108,0.387465585026727  
"Gjc3",29.1024010928728,-0.0261611806958921,0.409627004453449,-0.06386  
58594562097,0.949077036966008,0.968447983397698,-0.000838740690533958  
"Magel2",0.262504470878925,-2.01337166768009,4.74889217132398,-0.42396  
6600007843,0.671590171850734,NA,NA  
"Ces1d",11141.9792582285,-0.312528488283461,0.919852364060894,-0.33975  
9401067074,0.734037724216041,0.826072737257689,-0.0597155838586633  
"Hamp2",3.96372229771879,-5.33765558573527,2.51326841624692,-2.1237904  
9974536,0.0336876657636644,0.0859403515713631,-13.0991502327775  
"Fam71d",18.9817154775029,2.60632674762886,0.686964336952751,3.7939767  
8661173,0.000148253540286182,0.0013514013690977,17.2189926259841  
"Olfr1178",21.9758314605573,0.938635980366837,0.556772701396688,1.6858



5129625111,0.0918244447363424,0.184964394118286,1.58403451191937  
"Ide",5030.89690259847,0.0756163874931963,0.253216882523227,0.29862300  
9412732,0.765227707129103,0.847955652132721,0.0124711795219058  
"Nxf3",1.08344220797366,-2.10999710986985,1.87665597683817,-1.12433878  
980036,0.260869328488811,NA,NA  
"Myh4",2.18202969233085,-1.71720424987748,2.65436099835298,-0.64693696  
5598499,0.517672740337929,0.651097854704012,-0.736844330502013  
"Gm7536",11026.8496133635,-0.270057877747557,0.203510102044422,-1.3269  
9986405888,0.184508727634056,0.312748949961648,-0.313902985970509  
"Cfhr1",1.21412046363755,2.73230730663748,2.01199235360267,1.358010780  
58026,0.174460263386493,NA,NA  
"1700010B08Rik",0.100848509796288,-0.0667539810140215,4.78471990596623  
, -0.0139514919004525,0.988868681121274,NA,NA  
"Inca1",197.378391837851,-0.182990311993602,0.509602238554182,-0.35908  
4592157155,0.719531807679659,0.814291670215218,-0.0375929184977408  
"Skap1",178.541449861557,-0.816400167051785,0.365409249661652,-2.23420  
772136372,0.0254694086295656,0.0694743326048223,-2.17717425894264  
"Slc35f3",534.202074439016,1.61597197102703,0.48463629843705,3.3344014  
3926185,0.000854831890416772,0.00522640676113584,8.49036728465252  
"Fam47e",24.4568288903455,-0.529227658958509,0.425749895420464,-1.2430  
4824182247,0.213850056910651,0.348545382399387,-0.557798985348406  
"Ero1lb",771.392841718276,-0.159520279337675,0.15882609713604,-1.00437  
070616324,0.315199964358512,0.46052801489465,-0.12368908772133  
"Ces1g",411.235087090648,0.832754587832733,1.0567922840161,0.788002146  
143646,0.430695450541478,0.573221835812815,0.463413345908619  
"Fxyd3",976.631911337522,-2.45571526959515,0.668699456743317,-3.672375  
15274038,0.000240306559432186,0.00194823172382901,-15.3257092027557  
"Zfp607b",158.450136814762,-0.347513243868721,0.257981302013586,-1.347  
04818200514,0.177964715354174,0.304809910398427,-0.412868996693126  
"Eb1f",2295.25613053453,-1.10476884800866,0.391621933340223,-2.8210086  
155948,0.00478729171362152,0.0192062991424264,-4.36661762346021  
"Zfp180",1179.17678824925,-0.0571525273753197,0.0936672804133133,-0.61  
0165333328033,0.541752291438397,0.672208615149922,-0.0227002150247632  
"Nat8f1",8064.78304888038,2.48058603449718,0.635903196107281,3.9008862  
5074105,9.58411787881289e-05,0.000959297383989187,17.238359929256  
"Cntrl",1624.95549107882,-0.134243115817342,0.217164906317768,-0.61816  
2105901725,0.536468486435671,0.668157622653313,-0.0541310088198263  
"Npm1",12560.6307833014,0.0284396253374824,0.129892611327833,0.2189472  
13754169,0.82669116735397,0.889363516942602,0.00333452393341646  
"AF366264",2.82467019456137,-0.701669763618382,1.01608290225823,-0.690  
563498370979,0.489839892796114,0.626370555465546,-0.328250336324156  
"Gja5",483.360375505073,-0.529885645025687,0.253489894094668,-2.090362  
01193802,0.0365852926355285,0.0915712497827386,-1.26676471815338  
"Txnl4a",1370.30078103994,0.183675818488488,0.183677644156916,0.999990  
060475592,0.317315318034664,0.462407628627794,0.141670713407058  
"Rpgr1p1",345.698075291826,1.14744551205871,0.296791181041296,3.866171  
18484746,0.000110557350459231,0.00107246130311149,7.84600176209021  
"Chd6",4552.17443935041,0.495331395886403,0.360320234037591,1.37469769  
692347,0.169225185551865,0.293528393193689,0.607167766417656  
"Ado",1391.28786310603,-0.340879707177194,0.201472906940181,-1.6919381

9831271,0.0906577578242658,0.183023914066839,-0.578860939872182  
"Scimp",166.772669979484,-1.28869733861028,0.418249870337669,-3.081166  
14015892,0.00206191563460646,0.0102272274341279,-5.90571556022168  
"Tmem140",2294.00269994506,-0.225831038855036,0.195927928804185,-1.152  
62300904909,0.249065154889986,0.38859505401656,-0.21345944315288  
"Trim12c",2728.31964185719,-0.326755062561862,0.194605936886962,-1.679  
06009338071,0.0931403326560558,0.186854430262684,-0.548107245790056  
"Dph6",858.163177427124,0.219208450363269,0.138833574361248,1.57892967  
440919,0.114352188640126,0.218292439211394,0.333617648246799  
"Homez",517.053894843049,0.390132031790067,0.235049064681383,1.6597897  
6482593,0.0969567534993717,0.192721125903809,0.642356712427239  
"Gm6054",2.22187389690447,-0.179339531266759,1.02139814113754,-0.17558  
239440991,0.860622034687399,0.911681431725247,-0.0165825682897101  
"Gm16372",1.35819105861965,-3.31232460987547,1.65570914140258,-2.00054  
739509956,0.0454411874623806,0.107958117843487,-7.37327408044563  
"Prss2",1.67242548066786,0.959517173972061,1.3775404629579,0.696543731  
217704,0.486088380376813,0.62312068144054,0.453866082038767  
"Prl3d1",0.220934797106265,0.4.78471990595636,0,1,NA,NA  
"Rfx8",2.46650828942282,-1.89835197827093,1.18622586171441,-1.60032927  
922117,0.10952555478746,0.211187625320993,-2.95195312258181  
"Ccdc189",352.751427473235,1.31178149610648,0.217169676579776,6.040352  
9478233,1.53777476634041e-09,2.15708866144643e-07,20.1349751788893  
"Gsk3a",4461.3900309185,0.000503684946941034,0.117578712086017,0.00428  
381071713519,0.996582024021298,0.997707758490823,1.15589284240751e-06  
"5730455P16Rik",938.657807539147,0.187105012822371,0.180806781100189,1  
.034834045957,0.300746420109359,0.445318476556219,0.15136151430879  
"Scn3a",94.2793806549776,-0.383153673671843,0.592884689695262,-0.64625  
3277123384,0.518115341201469,0.65146146403213,-0.164195538794165  
"AB124611",377.361665830461,-1.09101917505562,0.357877554247594,-3.048  
58229331926,0.00229923929696482,0.0111269714103301,-4.9078223947249  
"Slc44a2",4477.18220665416,-0.405703762599447,0.139832985941578,-2.901  
34520025875,0.00371564310601281,0.0158911185086725,-1.68042291972881  
"Vmn1r234",2.31579974342866,-0.206175843627072,1.09799548643579,-0.187  
774764262776,0.851053219059257,0.90524528414827,-0.0205246691151174  
"Olfr1028",60.1845379309014,0.489310246129279,0.258198682067771,1.8950  
9195868337,0.0580802198052683,0.130398476554957,0.996803413874338  
"Gm10807",0.252612363332834,0.398434319748752,4.78471990595398,0.08327  
22348601744,0.933635076971157,NA,NA  
"Armc7",516.766655271016,-0.545465032203522,0.166403294242353,-3.27797  
015490027,0.00104556449783543,0.00608549748620755,-2.7828790289115  
"Aadat",5701.26311798763,2.6814932604622,0.937027565592322,2.861701575  
20088,0.00421373456849789,0.017443608623476,10.8567815533596  
"Dmac2",2792.17481444797,1.09470384377542,0.201959180261811,5.42042130  
670315,5.945874163002e-08,3.10811405979123e-06,13.8824806944451  
"Aak1",2596.91787003573,-0.0684528871413294,0.192611529814822,-0.35539  
3507372796,0.72229481218667,0.81670750684387,-0.0138599474621862  
"Mettl15",197.761564894557,0.0250112707430793,0.282683643218404,0.0884  
77955280049,0.929496804752468,0.956333813513448,0.0011167094580404  
"Rbbp4",6677.38245025633,0.45018936113429,0.11864272601616,3.794496099  
76908,0.000147943607309241,0.00134983830384445,2.97474796579701

"Gm6139",2.39848776454143,-0.058814189831702,1.17380422016871,-0.05010  
56213814332,0.9600382201524,0.975802805428322,-0.00144063926462014  
"BC051142",97.6082180780164,0.0961813910528458,0.445516439035426,0.215  
887412058431,0.829075509461219,0.891010752359036,0.0110992155556453  
"Gm10020",85.7640982734386,1.56069577028612,1.04018137367127,1.5004073  
4220969,0.133508918802675,0.245049129136266,2.19480109522836  
"Bbof1",238.034436926138,0.814290506783524,0.358570001173396,2.2709387  
4032634,0.0231506866411075,0.0644569596070705,2.23258716183121  
"Snrpg",1515.82641195326,0.0409442420671778,0.189130385941897,0.216486  
853041987,0.828608271948096,0.890759742941011,0.00473645189500198  
"Musk",4.49149499541027,-2.01520090384128,1.19404195127771,-1.68771365  
334767,0.0914662096000771,0.184407833190187,-3.40690971032316  
"St6galnac2",6101.35873818371,0.695155752966251,0.215122733864648,3.23  
14378888641,0.00123169089289907,0.00689902586318475,3.45935574950924  
"Arhgap24",5977.68706888775,0.605646843337142,0.218769684449323,2.7684  
2216444042,0.00563284386618319,0.0217225454317325,2.31926680651433  
"Rpl38",7658.95447836131,0.168733169580734,0.170040396277466,0.9923122  
57996632,0.321045225529814,0.466309580406757,0.128727468132626  
"Bcl2",1952.99832445708,0.0597188900887279,0.246111726220685,0.2426495  
11284069,0.80827692272477,0.877917205844944,0.00777557795201921  
"Cep170",923.101937432615,-1.07772887918866,0.180159090485606,-5.98209  
547064049,2.20285085705244e-09,2.73574433189863e-07,-16.2863069912021  
"Chst3",252.753931483719,0.447956261071563,0.293549724427717,1.5259978  
9335475,0.127010389141166,0.236122098348061,0.64658286331208  
"Sphk2",2156.89751484122,0.331880500187342,0.122332453409761,2.7129391  
3378559,0.00666893546625869,0.02482453297463,1.2266047347093  
"Apol9a",205.800149080327,-0.20592764584546,0.414317717491142,-0.49702  
8336351227,0.619169069112748,0.73726100265774,-0.0627694868319728  
"Uxs1",1730.35728380142,-0.0198108333385216,0.267422577814176,-0.07408  
06311136807,0.940946227039388,0.963448156735216,-0.000737688072810374  
"Birc2",3903.36971190366,-0.231008166415878,0.217916682476692,-1.06007  
563895704,0.289110189575795,0.433054503829519,-0.193328813410984  
"Gm8724",0.284274491032423,0,4.78471990595067,0,1,NA,NA  
"Yipf1",1450.78782512732,0.293060702316375,0.145636021286735,2.0122817  
1249875,0.044190249067973,0.1058633095377,0.658099032580162  
"Ryr3",50.3163476535405,-1.61501272807689,0.835892272295017,-1.9320823  
7664733,0.0533493391641455,0.122132841965775,-3.39579998491336  
"Mrpl18",2878.77390194881,0.450615828581725,0.194709750497063,2.314295  
13638312,0.020651538404674,0.0588689613763647,1.2763428827506  
"Zfp759",188.063341851126,-0.295668796529141,0.198070368566751,-1.4927  
4623291014,0.13550362631468,0.247823816329015,-0.412468971016573  
"Ces1c",13.6925267336531,1.1841902549653,0.821985667369584,1.440645867  
65216,0.149684755197204,0.267585344900989,1.56113780943258  
"Clnd34b2",1.02397631499276,0.872130571182675,2.89728303949895,0.30101  
6697123765,0.76340176222701,NA,NA  
"Nsd2",1686.85554711196,0.0135878693708978,0.261126518001436,0.0520355  
782893832,0.958500344427659,0.974767648088204,0.000347253573983469  
"Zfp53",425.188756113774,-0.370259330207258,0.184878469919485,-2.00271  
740873075,0.045207629137978,0.107534262892802,-0.825658222611976  
"Fam173a",3414.76616479083,0.56900548525025,0.168954034476731,3.367812

35803288,0.000757671443826356,0.0047456080346053,3.04448416970042  
"Las1l",3079.33002839687,0.309801749458752,0.174798179911086,1.7723396  
7548368,0.0763381889546094,0.160271563285988,0.567211571836012  
"Ugt2b37",4635.77434061996,1.78957225798596,0.648201233427423,2.760828  
22077248,0.00576549925507302,0.022120366878279,6.82051893026189  
"Mpp7",977.682658058571,-0.0161330762251812,0.192850351819481,-0.08365  
59335929168,0.933329994173009,0.95844884533551,-0.000684673032263107  
"Cts8",0.692904774683231,3.13660901569162,2.44243529982666,1.284213758  
25768,0.199067172527901,NA,NA  
"Olfr1205",0.383495713169687,-1.07039730038141,2.3787848589226,-0.4499  
76506436236,0.652727380791748,NA,NA  
"Lypd3",174.951802347564,-3.29680181076915,0.883960004576019,-3.729582  
55317266,0.000191797261614556,0.00164092277620036,-21.1407301616646  
"Rit2",2.11820328532374,-0.564294084158441,2.6592058831457,-0.21220398  
4556062,0.831947898303185,0.892654640167043,-0.0640787047983789  
"Phex",7.1945209873988,-0.447032023177841,0.613996578096988,-0.7280692  
41954679,0.466571201128206,0.605337893480938,-0.224395983055304  
"Olfr1415",0.229411702360488,-0.552630385237068,4.78471990596623,-0.11  
5499004350908,0.908049609609268,NA,NA  
"Saa2",0.379043611019548,1.15020763043668,3.76237006546527,0.305713582  
242858,0.759822730994469,NA,NA  
"E2f6",936.318637603399,-0.367368474684179,0.182722918450916,-2.010522  
14904757,0.0443759544025616,0.106200308728484,-0.823797450615001  
"Fam136a",1245.86900784827,-0.185309841582367,0.280441191457582,-0.660  
779682967493,0.508753614022118,0.643174347805437,-0.0817845424620642  
"Olfr1459",139.535240687772,0.575805639358167,0.201766615672782,2.8538  
2017950873,0.00431969745077593,0.0177916055967953,2.31993734790626  
"Bloc1s2",1474.29666528215,0.0777977597996378,0.194372395663255,0.4002  
51072350933,0.688971601167081,0.79151356820385,0.0181897586495646  
"Spop",7045.69862343906,-0.256215387726456,0.143425124814874,-1.786405  
19265482,0.0740336754686452,0.15678381712693,-0.474738259374531  
"Ece1",4184.55546270678,-0.287164925770728,0.234754136997013,-1.223258  
21152358,0.221232185279905,0.357114425746136,-0.295693445016719  
"Dtnbp1",2276.67249509364,0.208355283221989,0.27615548013836,0.7544854  
19292053,0.450557797337622,0.591142987180469,0.109531820197327  
"Elobl",3.23788085069424,-1.25188960067999,1.13686804667174,-1.1011740  
582779,0.270820909883672,0.413291410395574,-1.10617258140562  
"Pus7",728.410956676662,-0.159444133070053,0.171705550142153,-0.928590  
44415309,0.353101375985569,0.498030823956306,-0.111147438223319  
"Zfp317",1843.31238834015,0.285132037637764,0.122413380905118,2.329255  
47460182,0.0198455356451289,0.0570972781479598,0.816332690613824  
"Lgals8",3520.54919826522,0.0280508287026931,0.143337995011926,0.19569  
7091342454,0.844847261165644,0.900696150593675,0.00293376082936673  
"Eif1a",2634.92472352483,-0.959096115785561,0.224173960647338,-4.27835  
647376715,1.88278329625328e-05,0.000275604419747346,-7.86127349613048  
"Olfr1508",0.582693369802926,3.06930011363307,2.80638310114225,1.09368  
536048546,0.274092997068998,NA,NA  
"Zbtb8os",1659.93194106756,0.605581560083352,0.324740152498157,1.86481  
885724553,0.0622067991623996,0.13717577132645,1.2029830292886  
"Gm10025",80.1459345444506,0.32317410235883,0.241928322718556,1.335825

82943292,0.181606208407773,0.309604356210089,0.378908729678293  
"Gm10012",35.0002422720661,1.53222761546711,0.333341288613675,4.596573  
1453174,4.29496241199239e-06,8.83366847141641e-05,14.3023566279989  
"Arl16",405.564933536927,-0.0793595331120003,0.170006530892377,-0.4668  
02849840157,0.640640936733683,0.754209454439884,-0.0223861464777049  
"Trim30d",694.452197175803,-0.934091988907138,0.24891278580453,-3.7526  
8785766865,0.000174948639217301,0.00152555839331795,-6.05795530552615  
"Lmcd1",888.898384457581,-0.778468903479835,0.189166650125086,-4.11525  
447516818,3.86752486367747e-05,0.000474867756876469,-5.95721319881173  
"Gm6807",1.80239502212371,1.27898620095417,1.33231411383211,0.95997346  
847542,0.33706856811977,0.481477138549398,0.934806574301536  
"Colq",38.3174074746846,-0.701263194300477,0.834848654139794,-0.839988  
410861176,0.400914884439212,0.54500721026255,-0.425636081878214  
"Gnai1",2590.14411929047,-0.0575368477013536,0.381960092624978,-0.1506  
3575701309,0.880263053206765,0.925249003311348,-0.00447017491907438  
"Ldoc1",1.05084694279754,-3.48514676715198,2.42511517501821,-1.4371056  
6947642,0.150687970530388,NA,NA  
"Prdm2",2498.80230303936,0.261544543725963,0.138795574242323,1.8843867  
6920154,0.059512678184877,0.13276438850547,0.528105312175453  
"Brd9",3733.89265629846,0.185336343223844,0.330818117537028,0.56023637  
58179,0.575318218415668,0.700967946056096,0.0658487274514931  
"Olfr328",30.7328336453024,0.264695894514859,0.292309306972921,0.90553  
3584462227,0.365182776009777,0.510162195789828,0.178147370736624  
"Rps18-  
ps3",2.14818792652999,0.424003824933024,1.43542624417044,0.29538530917  
5579,0.767699554484398,0.849861233937251,0.0689778737835719  
"Gapdh",83684.100922819,0.769575219022282,0.310350526699778,2.47969683  
57226,0.0131494130505796,0.041783472461227,2.44359711057092  
"Bloc1s3",493.326518882018,-0.148924249759333,0.197984179368375,-0.752  
202778193912,0.451929123175666,0.592503633921405,-0.0779466951007269  
"Pkn1",6728.42325432821,-0.00407257600044819,0.13055245433303,-0.03119  
49401583775,0.975114075120909,0.984521038460692,-6.35322321988253e-05  
"Zfp746",1223.80010899082,-0.0400132475867031,0.13140853285744,-0.3044  
9504850733,0.760750764491813,0.845188726921585,-0.00673004142597243  
"Rpl30-  
ps1",2.37778020645913,-0.376812751420344,1.25009140474713,-0.301428159  
564513,0.763088024014216,0.846396995439143,-0.0628398445811499  
"Vmn1r53",0.360339333111378,-0.0589331572383788,4.72517455817481,-0.01  
24721651047624,0.990048910013933,NA,NA  
"Mex3b",256.055506608982,-0.635737024069058,0.336103428520101,-1.89149  
223162726,0.0585586670090294,0.131162253908343,-1.29138542247372  
"9630041A04Rik",0.329165474585028,-0.177945458443077,4.744403604646,-0  
.0375063913763202,0.970081244152685,NA,NA  
"A830018L16Rik",47.121669932465,-3.36942454684784,0.962302530418125,-3  
.50141919026629,0.000462787295002439,0.00325051393298183,-19.303238347  
8348  
"Tmem178b",85.2956468002515,0.802465945208514,0.340052152460877,2.3598  
3198283339,0.0182832136544717,0.0536069323059985,2.34807705343574  
"Sh3rf2",31.9857152266321,-1.28135067323112,0.509195005223038,-2.51642  
427770843,0.0118552372079781,0.038667349461552,-4.16792585478923

"Lepr",884.316382778207,-1.00069878097252,0.273980189783445,-3.6524494  
0432909,0.000259750786253523,0.0020663487680013,-6.18629195384851  
"Prtn3",77.3666871744851,-1.27031815879505,0.401849466524525,-3.161179  
15940427,0.0015713181803475,0.00833902065335209,-6.08077102693786  
"Sptan1",13031.8449756247,0.0310636956954597,0.143920490849121,0.21583  
928398372,0.829113025773607,0.891010752359036,0.00358471270486658  
"Megf6",349.379614603131,-1.10316176364734,0.397662808505542,-2.774113  
49528293,0.00553523636355802,0.0214253194887237,-4.23965132574532  
"Gm6169",14.8248943999692,0.8406025979807,0.571187293741727,1.47167594  
095816,0.141108407513002,0.255771286575115,1.14613780760534  
"Ankrd29",956.814321128937,1.10261086752504,0.309985973990366,3.556970  
18588107,0.000375156714490291,0.00275108474694754,6.50072903910654  
"Mab21l2",5.63215925579606,-3.40744188839171,1.45950135731595,-2.33466  
167832695,0.0195611016959887,0.0564789517056698,-9.79260378597106  
"Cyb5d2",530.82621975366,0.086592668516722,0.252567761746988,0.3428492  
53276699,0.731711870328234,0.824232968920718,0.0167385411844266  
"Ddx49",1889.47536524918,0.436380456439059,0.180574762678105,2.4166192  
9921491,0.0156653918332162,0.0476883387922014,1.32793556896286  
"Bak1",1398.87438681798,-0.841226903737317,0.178247339204548,-4.719435  
96741135,2.36499474509904e-06,5.43140960423335e-05,-8.26145957241211  
"1700084M14Rik",0.226428935786491,1.59799390480466,4.75790912219189,0.  
335860535324493,0.736976038295608,NA,NA  
"Cfap299",2.06937308341009,-1.40189754785873,1.44923838003137,-0.96733  
3992236933,0.333377096012028,0.478060352875084,-1.03462603553442  
"1600029015Rik",14.745309562412,-0.261875904077014,0.703205164943648,-  
0.372403271665389,0.709592618386945,0.807368060385607,-0.0560350615427  
386  
"Gm5278",17.6003545368435,1.47837206984192,0.494305510903373,2.9908063  
6819141,0.00278241863718819,0.0127861415479367,6.44480542354946  
"Zfp119a",195.519425983091,-0.334278467192084,0.157287971054597,-2.125  
26402973341,0.033564587915205,0.0856712050229962,-0.821401921724256  
"Xlr3a",135.01335580375,0.253767165416604,0.268287495803319,0.94587772  
2168017,0.344210957465758,0.488707875094105,0.181694844240263  
"Rpl32",11581.5398369539,0.0135674374053072,0.196317241893442,0.069109  
7596647748,0.944902252515621,0.966007976066987,0.000469205238541719  
"Zfp595",394.665692878803,-0.25881273996279,0.11849194791398,-2.184222  
17306003,0.0289459263742212,0.0765271420263816,-0.665177160208946  
"Fam204a",931.566280305049,-0.163199530119405,0.17752617695305,-0.9192  
98398244477,0.357939515406946,0.503034789635622,-0.112133735695488  
"Rpl36",10855.7395183744,0.139975585225276,0.204428188887385,0.6847176  
31101186,0.493522121097391,0.629716269691573,0.0647367382357621  
"Abat",5360.74957741442,1.39137255638185,0.48403620868049,2.8745216399  
7154,0.00404640040082082,0.0169451707506882,5.67370060465566  
"Cbx3-  
ps6",1.46839448843332,1.09463572451184,1.61640601466231,0.677203446771  
71,0.498276881167051,0.633875032882832,0.499048206572321  
"Zfp329",1317.36665823605,0.269221610396604,0.274321428393095,0.981409  
33420198,0.32639092496577,0.471300470634866,0.202524499613157  
"Zfp105",224.321279161366,-0.652525141999731,0.209847722868992,-3.1095  
1738278857,0.00187393257645228,0.00949530597080732,-3.03878199154182

"Camk2b",375.058754384404,-0.589990060400976,0.211319050879582,-2.7919  
3976096919,0.00523931090359059,0.0206250926707469,-2.28989706561274  
"Adgrf2",6.00714614803017,-1.00061052875679,0.784936018294553,-1.27476  
699429698,0.202391726261532,0.334420751911989,-1.0960240884795  
"Olfr739",0.110416939046264,-0.0613053526206933,4.78471990596623,-0.01  
28127359230056,0.989777195532652,NA,NA  
"Cacnb2",208.783410727297,-0.0396160870786291,0.211233397749616,-0.187  
546512533912,0.85123215886733,0.905374461793323,-0.00393810253920057  
"Gsta2",5610.40168256816,2.05727603812409,0.622770252528307,3.30342695  
3635,0.000955108487527895,0.00566728706324373,10.6423810038704  
"Unc13d",820.031768556843,-0.0318811762956021,0.303942139680977,-0.104  
892254588538,0.916461305007334,0.948771504992726,-0.00167654446797217  
"Itpk1",1500.96427648639,-1.03807354779789,0.392400078566529,-2.645446  
83984281,0.00815831048647066,0.0289114390885505,-3.67843224585392  
"Fgf18",44.4951386428523,0.0865575107281927,0.420707109112084,0.205742  
923885634,0.836991727356478,0.896085411758853,0.00949705068708399  
"Sema3b",2464.66167093273,0.0920902668595062,0.127680793619043,0.72125  
3872640176,0.470753331592266,0.608723463573037,0.0457127978170375  
"Vmn1r12",180.10483564066,0.336052492799224,0.368195949668614,0.912700  
134538904,0.361400273153151,0.506256378040098,0.228754985328058  
"Zfp809",968.167725588943,-0.0324122957219033,0.133367372414423,-0.243  
030173985779,0.807982022601815,0.877710929672416,-0.00422779427846708  
"E030024N20Rik",0.436969812451044,-0.74715961080602,3.80873444221066,-  
0.196170046019894,0.844477072337697,NA,NA  
"Mdn1",1586.17795388295,0.487736000513232,0.234198706158788,2.08257342  
02927,0.0372901240814653,0.0928680665805658,1.15914139610628  
"Sept11",4528.361053792,-0.600094878225726,0.248519762010209,-2.414676  
69762647,0.0157491819581931,0.0478686749525874,-1.82386473646736  
"Ces5a",2.86173834217654,-1.76011489357732,1.24694783615783,-1.4115385  
1230914,0.158085888161264,0.278996981115888,-2.24688226685495  
"Adtrp",3364.61305805862,2.09230223370419,0.571699260814886,3.65979524  
045889,0.000252416866308278,0.00202369410332188,12.9781964738741  
"4933430I17Rik",8.9752918460837,-0.778074209617291,0.653042808081595,-  
1.19145973278994,0.233473155441356,0.370977066644573,-0.77155008324802  
7  
"Gm9234",0.51778838493332,-0.43449467875584,1.96576257755846,-0.221031  
10707067,0.825068211982334,NA,NA  
"Palld",5969.0160850593,-0.371101735471781,0.195715248548893,-1.896130  
92604317,0.0579427340973388,0.130210474882058,-0.756529148422606  
"Mettl7a3",11.9955699665443,0.305760805380996,0.542071485325121,0.5640  
59932423135,0.572713345224346,0.698927508617656,0.109526042829797  
"Trim31",1.75143597920901,2.05454740883249,1.31180236881687,1.56620193  
534603,0.117301349789954,0.222592867951779,3.08677438133455  
"Gm10036",4.43226392978378,0.762212959701059,0.699376466040042,1.08984  
645139235,0.275780788121489,0.419207437966227,0.662659869911557  
"Eml1",1561.76721706697,-0.655260112476794,0.158423002971619,-4.136142  
48048423,3.53192939542794e-05,0.000443721387577668,-5.05881362207597  
"Sdhc",16702.5463616435,0.693365758516323,0.35532396158354,1.951362231  
31776,0.0510139709999098,0.118188023592709,1.48066767160246  
"Olfr825",221.369340897485,0.801267494094699,0.362005660980903,2.21341

150280235,0.0268692883440967,0.0723802218538675,2.10398597070648  
"Zfp729b",497.796986782117,0.0158507380938995,0.139700444992265,0.1134  
6233073758,0.909664025898414,0.944744283422141,0.000900971608402772  
"Nfam1",905.832476901362,-1.21491130932242,0.416514471346123,-2.916852  
57752505,0.00353582849301226,0.015337393538766,-5.07524511151841  
"1700084J12Rik",0.372114167654739,0,4.78471990595387,0,1,NA,NA  
"Olfr127",26.3232923966923,1.38098081374482,0.534426156833175,2.584044  
20533612,0.00976492777720595,0.033164354955576,4.70400680940611  
"Tpm3-  
rs7",3.68188382103891,0.096094336333519,0.939473434432023,0.1022853151  
6872,0.918530210968158,0.95000541340214,0.00492844750800116  
"Gstm1",27748.9688551699,-1.07278776939449,0.490790514577362,-2.185836  
39563269,0.028827576968922,0.0763177319402636,-2.76012198035398  
"Adamts17",49.9579359277163,-2.27783529302446,0.541862631645148,-4.203  
71356132961,2.6257117949564e-05,0.00035259041720427,-18.1092540413433  
"Xlr3c",1.29547373758707,-3.78822915350869,2.91434944528182,-1.2998541  
268418,0.193650970067332,NA,NA  
"Chsy3",41.3931438651996,-1.21446435903582,0.459337290209348,-2.643948  
97806427,0.00819450073055465,0.0289929537602539,-4.30005693427262  
"Sez6l",7.75413942797787,-1.82969458776189,1.0447374335803,-1.75134395  
394597,0.0798866808089869,0.166129533107255,-3.2842788680963  
"T2",6.84194085178412,0.609892398487408,0.585138732475722,1.0423039266  
3797,0.297270792441941,0.441546881315835,0.498569396534593  
"Gm5431",112.81937248932,-0.790228722301805,0.387438737001436,-2.03962  
238886525,0.0413879503562927,0.100470898412225,-1.81585643558911  
"Smco4",1332.10858523641,0.640822183677726,0.14386394420123,4.45436267  
742927,8.41427629841879e-06,0.000148471999336262,5.64892071445287  
"Gm5148",217.802411746582,0.173823935796217,0.418958744719009,0.414895  
113152009,NA,NA,NA  
"Mmel1",0.884891937910674,0.0906468861120617,2.59438034907965,0.034939  
70579303,0.972127819285016,NA,NA  
"Zfp980",7.88970275319692,1.85442554599265,1.03853815718717,1.78561137  
417934,0.0741622039758194,0.156953723338818,3.4340331498192  
"Zfp846",490.927241139021,-0.175316281246325,0.169907092740058,-1.0318  
3615480104,0.302148879006834,0.446722005254968,-0.141273153624272  
"Serpina3k",92.2310625659013,-0.561244294429753,0.885274470035294,-0.6  
33977724905336,0.5260953592557,0.658699021587726,-0.234313077175414  
"Gstp3",74.5170216064284,-0.969905879669496,0.397957086570223,-2.43721  
223317969,0.0148009895527077,0.0457605746338827,-2.99151210481542  
"Arhgap35",2937.06859293448,-0.0927064380301104,0.190699403256668,-0.4  
8613910923116,0.626868539805481,0.743426968501142,-0.027486044596176  
"Usf2",3852.86774953092,-0.304989553519429,0.137284131053491,-2.221593  
6479985,0.0263107795397015,0.0712906586249445,-0.805474353392558  
"Cryzl1",1293.14077808131,0.0435049193109021,0.115021150405136,0.37823  
4082667979,0.705256708528644,0.804213269037301,0.00947932101921974  
"Olfr506",16.7250848586924,1.26026535396747,0.492531863878985,2.558748  
87777234,0.0105049595698666,0.0352600622642896,4.21559307372346  
"Gm10037",114.457895703808,-0.197160671970478,0.201092271319348,-0.980  
448779443012,0.32686464131827,0.471705038592526,-0.14814680631886  
"Kcnh1",75.3469872010825,1.51933705163243,0.34659573703316,4.383599938



75824,1.16734059512716e-05,0.000191912368666015,13.0032031642056  
"Olfr822",0.702308965846378,2.08110633770607,2.59792044876365,0.801066  
229220556,0.423093305479324,NA,NA  
"Tcp11x2",0.28836637802866,-1.16290998233842,4.7768563725006,-0.243446  
712995822,0.807659360294172,NA,NA  
"Tspan7",1509.26191207446,-0.810124682047401,0.369792015937559,-2.1907  
5763437844,0.0284693359084964,0.0756327998847241,-2.09163274771507  
"Idi1",5715.01391990717,-0.191017698033667,0.468574250061461,-0.407657  
266716239,0.683525314800874,0.787251260439922,-0.0456929267336725  
"Serpina9",7.23517505764864,0.16648778049969,0.744908141000221,0.22350  
1088706238,0.82314553589288,0.886645567723203,0.0200301385384769  
"Mrps14",2472.62176824543,0.36978153088119,0.228071824434796,1.6213380  
6662694,0.104945155329497,0.204519803959473,0.586876742648996  
"Gm10038",4.64251629980355,-0.230604551574007,0.883567122118384,-0.260  
992680466792,0.794098151834863,0.867996735310918,-0.032646069612475  
"Gm12253",0.291658237925319,1.68528459738334,4.75512992455321,0.354413  
995857681,0.723028647231937,NA,NA  
"Espl1",254.121765219962,-0.818117889946256,0.502804209135326,-1.62711  
026495418,0.103713681297778,0.202829424066608,-1.30521704211256  
"Zfp68",1368.97690709029,0.139389818453004,0.121079674282949,1.1512239  
2985024,0.249640122907993,0.38924551713642,0.13152056416192  
"Spock2",413.406100247324,-1.10667919598725,0.189047595058961,-5.85397  
130094192,4.79971482829228e-09,4.67559815385824e-07,-16.1306666183862  
"Mcm9",483.350875434979,-0.134389966001013,0.26681623277242,-0.5036798  
72114979,0.614486354812332,0.73383076781594,-0.0415905818054181  
"Upf1",5316.3955067082,0.205304222749585,0.164202487796096,1.250311280  
32925,0.211185859320133,0.34524204619971,0.218342996367149  
"Ube2e2",522.301889113535,-0.100105709610054,0.228753680630574,-0.4376  
13547174876,0.661666449086024,0.770219249210705,-0.0261356052149345  
"Phf21a",3271.93586769334,0.0395280428648132,0.18600237810186,0.212513  
642396371,0.831706335750308,0.892641059859058,0.00448922858697101  
"Dock1",1599.04434862902,-0.441678388022299,0.225940788438381,-1.95484  
131517384,0.0506018029819124,0.117484395634833,-0.945832076845979  
"Xlr5a",3.31384814918075,-1.33109907413679,1.09330236549656,-1.2175031  
5022161,0.223412838585967,0.359533140207097,-1.36164636283744  
"Zfp85",183.070652890428,-0.104015918682274,0.151675922509027,-0.68577  
7392757134,0.492853494432296,0.629274928586269,-0.0481788243852272  
"Smim4",1049.07551761763,1.67320679441903,0.330149159803583,5.06803287  
161015,4.01948002332333e-07,1.33285410705371e-05,18.78275500497  
"Krt6a",0.898560250378702,-0.538464123533347,3.38670102641982,-0.15899  
3698981033,0.873673838169534,NA,NA  
"Abce1",3816.31159540521,-0.100750303261025,0.106313140793014,-0.94767  
4977048987,0.343294943492707,0.487904716686405,-0.0723019584779405  
"Gm6612",2.72255979214237,-2.08217123324631,1.41365788892613,-1.472896  
12964846,0.140779045850585,0.255340449859973,-2.84249173111892  
"Gm10040",680.045248321222,1.37344764452357,0.477894848764532,2.873953  
64916415,0.00405368449404788,0.0169611030611471,5.59931614772574  
"H2bc8",13.5241926512701,-0.619748829279317,0.460247999796168,-1.34655  
409595215,0.178123886768656,0.305028942931253,-0.735857912246059  
"Phtf1",1067.47605994533,0.0727955351485499,0.148957363440131,0.488700

480911826,0.625053763271467,0.742177594316245,0.021705205874084  
"Rrp1b",902.663942304208,-0.127614294225906,0.222915649192488,-0.57247  
7951584775,0.56699821890793,0.694125150515905,-0.0465923619937173  
"Gpr182",368.816785673499,-0.771445678956745,0.212203559725302,-3.6354  
0404296414,0.000277545290903737,0.00217245206023326,-4.7304268081456  
"Prss43",0.828798338700248,0.398686420962974,2.12958925494769,0.187212  
825213454,0.851493769551644,NA,NA  
"Zfp420",581.371479902812,0.125244947978968,0.164990148645171,0.759105  
613319502,0.447789381540814,0.588580110643306,0.0663851121128698  
"Txndc9",2960.06677109794,0.0234208314074394,0.143391603962109,0.16333  
4747365183,0.870254876801997,0.918523389276158,0.00199048751193226  
"Syt17",443.332418135166,0.826379511768192,0.336765764946352,2.4538703  
0923359,0.0141327941802087,0.0442739750844649,2.57612098404334  
"Cxc12",251.177537006278,-0.855640974394823,0.495182344884716,-1.72793  
110100488,0.0840005776101368,0.17262260352471,-1.50305962126437  
"Btn14",2.080852134163,-3.31542556624375,1.81083832485306,-1.830878837  
02306,0.0671186297558715,0.145297003676155,-6.39537412658242  
"Nr1f1",1497.26784361165,-0.0489266373715006,0.179398829998257,-0.27272  
5509815064,0.785064223797521,0.861018238024753,-0.00732136207396435  
"Panx2",13.5847886109084,-0.895691876856321,0.598469987961866,-1.49663  
624721879,0.134487933140284,0.246497999658701,-1.25432815877248  
"Rpl10-  
ps3",22455.2173662267,0.0124612363743151,0.151645692725697,0.082173361  
8036585,0.934508855991247,0.959053301443094,0.000520987163726577  
"Map2k5",936.728276512118,0.0626152338045506,0.154468959642596,0.40535  
8034063459,0.685214353696946,0.788637593316986,0.0148678863134423  
"Znrf2",4888.202956187,0.68678611089414,0.261285731749285,2.6284868534  
3883,0.0085765670497087,0.0299956779076628,2.40835421315328  
"Gm26920",12.9356772659839,-0.622173174242016,1.15316443990829,-0.5395  
35518708412,0.589517395616271,0.712920063246669,-0.21053467812064  
"Dhcr7",1095.0937943513,-0.511866958308148,0.325067045602412,-1.574650  
41514608,0.115337159013527,0.219678023487911,-0.77578163816037  
"Gm8369",70.7340260797112,-0.745539224438171,0.530154056729585,-1.4062  
6901741968,0.159644256581103,0.280882847393823,-0.946698835965932  
"Wdr91",2020.00491212366,0.815518578544689,0.227140600334991,3.5903690  
3724807,0.000330210110782693,0.00249648574642921,4.88729783297588  
"Kl",15426.1558701067,2.02677042829643,0.803748359502664,2.52164798140  
37,0.0116806533542291,0.0382514912832983,6.61451270314527  
"Scp2-  
ps2",38.3721839669178,0.966432997925425,0.561614123870165,1.7208132004  
6867,0.0852847262602284,0.174709139800581,1.68607065508479  
"Rnf207",46.6769914243234,-1.45782532144906,0.567470903119692,-2.56898  
690916945,0.0101996310428946,0.0343713111085997,-4.91364841534745  
"Fam133b",2951.72282128736,0.801367392383683,0.231665981754152,3.45915  
005006695,0.000541882933062906,0.0036826885426492,4.49095278939901  
"AW822073",0.121476062291212,0,4.7847199059656,0,1,NA,NA  
"Gm15590",2.69571864579323,0.276047363115881,1.17869835588053,0.234196  
783035015,0.814832212349196,0.882154274091318,0.0346131162982702  
"Rpl23a",19910.4297186053,-0.250270026942386,0.163235374460642,-1.5331  
8499601769,0.125230280031984,0.23390554651438,-0.363601778495492

"Rpl5",2850.95830347572,0.496796068437514,0.15292916161624,3.248537186  
67582,0.00116000045297326,0.0065846492166184,2.49541371385254  
"Gm2531",7.30079335414864,0.888574908588636,0.730127788399382,1.217012  
86090837,0.223599322648186,0.359655138838007,0.908665280117505  
"Tmed9",6574.15994137846,-0.0205057964813687,0.119983866853297,-0.1709  
04614254855,0.864298768395199,0.914632151216803,-0.0018298001981139  
"Gpc6",270.732913620103,-0.725637107620868,0.316583009038762,-2.292091  
13219346,0.0219003850065356,0.061823325156715,-2.0197924259571  
"Cela2a",1.85762991573132,2.3921992893487,2.44910853678166,0.976763280  
770015,0.328686358538607,0.473387990750906,1.78898219766398  
"Gm5801",3.51718201948617,-0.907223854130024,1.02192816113865,-0.88775  
6976106008,0.374671490486774,0.519805373666652,-0.593597310662674  
"Serhl",2190.28030427416,0.958728457477283,0.180974786100694,5.2975802  
7697762,1.1734732010694e-07,5.15323884559713e-06,11.6733675776448  
"Tmod3",4264.4868754671,-0.74926986643877,0.134604728360417,-5.5664453  
661132,2.59988244416572e-08,1.68413647496157e-06,-9.96098661881908  
"Anks1b",48.0057765617576,-0.17035821463328,0.768156401585608,-0.22177  
5427870719,0.824488708862319,0.887581760457018,-0.0203160071171252  
"Fbh1",2918.18816420392,-0.0749005615342265,0.175139292269976,-0.42766  
2808062327,0.668896631229511,0.776058869034312,-0.0189893071379812  
"Rpl30",14081.3893311611,-0.148296873018705,0.169157615091212,-0.87667  
8670001,0.380661195480066,0.525535083868182,-0.0954050623446371  
"Rpl28-  
ps1",6926.16807719566,0.32325217664992,0.179422358199858,1.80162706528  
386,0.0716041000629455,0.152649982837012,0.607587271297804  
"Cyp2d41-ps",0.431475453774672,0,3.63831354331099,0,1,NA,NA  
"Defa39",0.118397724875524,0,4.78471990595411,0,1,NA,NA  
"Adra2b",3061.75382348871,2.06026185367971,0.637714178132307,3.2306978  
9621687,0.00123488385565573,0.00690919273112568,10.2496017933773  
"Gda",1293.66001653495,-1.26455993920144,0.285450746910097,-4.43004599  
879261,9.42129903992437e-06,0.000163140753712651,-11.0280972457439  
"Gm17383",0.696190154610547,-2.28776830973428,2.37784812251953,-0.9621  
17087322716,0.335990791675821,NA,NA  
"Capn11",19.3362789410039,-5.85327089968079,1.69194148431579,-3.459499  
60677736,0.000541180067487443,0.00367919419660745,-32.8079434806192  
"Zfp110",1493.43642600574,-0.365735763105294,0.165033475988966,-2.2161  
307632504,0.026682547929932,0.0720177629482024,-0.962193183049178  
"Eif4b",13614.1411577836,0.0918778934248426,0.154643061315298,0.594128  
780453426,0.552425982659316,0.682326226396259,0.0351200856660874  
"Samd12",422.111333071274,-0.770812414937625,0.195212621230933,-3.9485  
7878592679,7.86165426166511e-05,0.000819400811515036,-5.47811542784969  
"Olfr58",0.10500178835157,-0.544048378937456,4.78471990596623,-0.11370  
5376621746,0.90947135024012,NA,NA  
"En1",1.36538908746904,-1.55806755406758,2.93232719166418,-0.531341645  
126351,0.595182051595852,0.717900379957682,-0.516381707312468  
"Nkx2-9",0.114810471722162,0,4.78471990596601,0,1,NA,NA  
"4932411N23Rik",3.08284586376019,0.988060546099278,1.26894582507715,0.  
778646752739983,0.436187830410859,0.578321115010943,0.541087646865696  
"Tubb2a",3053.33683949271,-0.421054756576636,0.152816493743305,-2.7552  
9654072489,0.00586389621193634,0.0224272750765663,-1.59894593215435

"Ccser2",6538.01049841327,0.859498541992582,0.225656009668807,3.808888  
33075644,0.000139592979471522,0.00128994498281315,5.71837763282446  
"Rpl21-  
ps12",0.850478422198096,-1.67440777687208,2.74718650950838,-0.60949912  
6133856,0.542193651799029,NA,NA  
"Memo1",1924.85095382939,0.254337360675745,0.182822292731406,1.3911725  
8008248,0.164173099909068,0.286755092898595,0.31769960389013  
"0610030E20Rik",2632.44859511088,-0.147747125910872,0.121206098233903,  
-1.21897435907681,0.222853924621464,0.358781753964932,-0.1514468621386  
42  
"Egln2",2487.50667838275,-0.0104070276854395,0.149599998312444,-0.0695  
656938692213,0.944539343089189,0.965788877841157,-0.000362268858680786  
"Fcer1g",2198.19092893061,-1.1274885882303,0.397554113494108,-2.836063  
19230553,0.00456734080050369,0.018529756747445,-4.49684996602537  
"Cd300c",15.2080936582823,-1.15092783181176,0.686423287365678,-1.67670  
277654585,0.0936006174106113,0.187508973417456,-1.92657098714786  
"Lin9",370.204771123238,0.152078006412682,0.140590703077225,1.08170741  
79446,0.27938255598148,0.423101060651909,0.130809017353442  
"Kcnt1",443.943258028617,2.94135837963171,0.548078110470108,5.36667734  
660811,8.02003394308551e-08,3.87065895599706e-06,36.6554604736059  
"Prr19",1.43838877908162,-0.185287857896883,1.64686352985968,-0.112509  
539823661,0.910419406085102,0.945075737626967,-0.0104669498294084  
"Kcnj14",15.9693998791933,-1.83365973243064,0.680098660642326,-2.69616  
724535058,0.00701424393692607,0.0257947431690276,-6.70676552738046  
"Zfp958",354.89994686576,0.165325443926777,0.138493010787405,1.1937457  
564596,0.232577435960506,0.369825056789916,0.164453386043083  
"Osm",41.9655134658676,-1.7530554801619,0.552505343382676,-3.172920409  
11123,0.00150913889665538,0.00808384346345786,-8.44602468663685  
"Thra",3962.03332587099,-0.504512810572012,0.122643489200308,-4.113653  
43453343,3.89445979361202e-05,0.000476973473968889,-3.85853903882071  
"Rnf169",2707.40687576549,0.886305182826637,0.440605851128572,2.011560  
17460151,0.0442663210994775,0.106019497457022,1.98898605609814  
"H1f5",1.20065344860433,-2.11826166270281,1.57576612524878,-1.34427414  
624641,0.178859752673053,NA,NA  
"Cds2",4568.08434293221,-0.220503746118657,0.151216456577151,-1.458199  
39912529,0.144785589385152,0.260956685323692,-0.296224918210096  
"Nfe2",11.7684481680289,-0.543791595179718,0.607720635155623,-0.894805  
217598816,0.370891220708468,0.516029472054639,-0.359767842081645  
"Nap1l1",9002.19995179185,0.144470788579042,0.106209941134582,1.360237  
9121553,0.173754648871752,0.299572742391141,0.17414480127025  
"Col13a1",122.927987677088,-0.845087145312242,0.299487554330823,-2.821  
77717601825,0.00477583473458139,0.0191721691692131,-3.341724358318  
"Hspd1-  
ps3",1.86232192662819,0.345851731799588,1.51731276695212,0.22793700767  
0682,0.819695211938372,0.884472453922213,0.0424581105210941  
"Ppp1r2-  
ps3",0.162618559348441,-0.03688454637879,4.7847199059618,-0.0077088203  
9152001,0.993849312146037,NA,NA  
"Pirb",1323.67940244923,-1.12703734794114,0.426202018970901,-2.6443735  
5473459,0.00818422785589025,0.0289664321535938,-3.99153534268654

"Opn1sw",3.0331713176497,-4.766306939157,1.65823139259562,-2.874331628  
52883,0.00404883584393147,0.0169517288565548,-19.4340705778713  
"Rex1bd",3123.02389451904,0.158230516007779,0.274098497454227,0.577276  
115985285,0.563752945403969,0.691715746616738,0.0583206318404585  
"Abi1",3367.44236337004,-0.438069554111073,0.103769645724007,-4.221557  
7691784,2.42619755368684e-05,0.000333829860863666,-3.50669381515305  
"Rps27a-  
ps2",27.6271731672228,-1.34875534446949,0.676407216524838,-1.993999046  
01692,0.0461521587725427,0.109240636651976,-2.98641698945874  
"Gm5582",0.19567472416096,1.37272727049341,4.78471990596102,0.28689814  
6071876,0.774190310066915,NA,NA  
"Zfp516",809.597705515239,-1.17725341272899,0.178876708442344,-6.58136  
782021818,4.66139807276924e-11,1.31721651627326e-08,-21.3614514563263  
"Zfp708",237.401786176701,0.335003265982144,0.189174256092601,1.770871  
32732352,0.0765821013585387,0.160697138644941,0.612464297987912  
"Deaf1",1945.04068631197,0.444227711433008,0.210323291480018,2.1121184  
8344059,0.034676288013231,0.0878189717732145,1.08057401167191  
"Col25a1",23.8668604375381,0.354416285599732,0.487544630955054,0.72694  
1213372536,0.467261968743226,0.605720040137108,0.177682131920844  
"Rsl1",349.739704327241,-0.807477362598753,0.228160274853395,-3.539079  
54887239,0.000401524835482315,0.0029039062471195,-4.71703927089967  
"Gm10051",2.24873471849406,0.50266412312307,1.22218319883501,0.4112837  
77752969,0.680864463322737,0.785257263795684,0.121515980642638  
"C1qtnf3",2391.49456416798,2.11171354886965,0.579788051502324,3.642216  
39855781,0.000270300696094116,0.00213209003980534,12.9884163052534  
"Slc10a5",496.001408090936,2.04771556937375,0.634294860252059,3.228333  
85179886,0.0012451356589438,0.0069552471677689,10.1735811351727  
"Gm10052",1.24259425436273,-1.68265969542232,4.30703170215666,-0.39067  
7341562115,0.696035749261176,NA,NA  
"Ccadc192",0.539415839474765,0.86463096631182,1.79033733541471,0.482943  
046100045,0.629136176248595,NA,NA  
"Gm10053",7770.95119760177,0.172222810954524,0.520618882086301,0.33080  
4004388713,0.740792535965318,0.831164280484047,0.031848787873536  
"Cfi",397.910279818268,0.0203975781402141,0.468554700349567,0.04353297  
09103259,0.965276682444037,0.97904389433121,0.000431996259979618  
"Fam57b",280.390976616354,-2.65715848003416,0.759199338259975,-3.49994  
836155173,0.000465348294176529,0.00326262532896583,-15.2128250891612  
"Kcnc1",7.61046461823042,-0.000502371919721736,0.777967826979652,-0.00  
0645748965830789,0.999484766905817,0.999843721980895,-7.85158237765505  
e-08  
"Usp17lc",0.906878081437587,1.49935446265448,1.43807411172029,1.042612  
79056118,0.297127662953379,NA,NA  
"Hdhd5",1397.56878157726,0.460007313664125,0.1508035058207,3.050375461  
50323,0.00228555446153392,0.0110717368673263,2.07157837321287  
"Vwa8",6993.67234852385,1.0869194579112,0.29854162333635,3.64076354166  
075,0.00027183070307071,0.00213802139914187,6.68224437262615  
"Grin2a",2.85793983780511,-0.0595161767473924,1.22680688991384,-0.0485  
130767007449,0.961307343013119,0.976507253256082,-0.00141488407400891  
"Hnrnpa3",18342.5572507006,-0.258688043133461,0.126343526769778,-2.047  
49740447597,0.0406092714492649,0.0990368448677633,-0.598154875453095

"Sh2d3c",1101.81738634472,-0.365236777569725,0.185689714149678,-1.9669  
1981159128,0.04919245613828,0.114965181563488,-0.790053157107789  
"Kcp",986.002984158173,1.06915828173422,0.389597705257036,2.7442622667  
1137,0.00606470639032669,0.0230371410868088,4.0314190402169  
"Olfr482",1.58428721388556,-4.23538056589555,2.07039431307974,-2.04568  
788618597,0.0407870883378749,0.0994083310514857,-9.77745801400959  
"Rpl18a-  
ps1",0.890308202117604,1.91191772928941,2.38230773860678,0.80254859534  
123,0.422235689972504,NA,NA  
"Eno1b",37.1638370139767,-0.350208999199069,0.471392900061517,-0.74292  
3788528353,0.457527822470866,0.597444061650789,-0.180390771442626  
"Klk1b9",45.6532916598567,1.74310700349014,0.640212863092932,2.7226991  
2708254,0.00647509982782247,0.0242418387947163,6.48379200127871  
"Olfr15",0.642054943884042,-0.785912814819883,3.04807083595912,-0.2578  
39419461058,0.796530840457341,NA,NA  
"Frem1",897.516617475368,-0.621374853456762,0.479479432013743,-1.29593  
640929931,0.194997394144476,0.325574515416081,-0.697284439805697  
"Tma7-  
ps",1.54878072144444,0.755568042330276,1.45318927766666,0.519937804346  
773,0.603106925233862,0.724602105308373,0.243393094211749  
"Rad51b",75.9744173210608,-0.809149267676543,0.333643598490927,-2.4251  
9044674117,0.0153003579327644,0.0468183268947017,-2.47719474698027  
"Rpl18",18939.2923343261,-0.210432267419983,0.203234808835047,-1.03541  
449728121,0.300475378197388,0.445086144806859,-0.170342275703807  
"Olfr698",0.0837058623428615,-0.544048378937457,4.78471990596623,-0.11  
3705376621746,0.90947135024012,NA,NA  
"Fcgr4",480.6193029342,-1.23023026448534,0.499028818875975,-2.46524893  
543491,0.0136918090752379,0.0431978791826842,-3.86533905254993  
"Olfr961",0.167613395958659,0.410555991343917,4.78471990596623,0.08580  
56478566239,0.931620916700046,NA,NA  
"Ifitm6",53.7931642693182,-2.08675060540431,0.422475419344211,-4.93934  
205365954,7.83866062111831e-07,2.27776758257176e-05,-22.3067997814269  
"Nap1l4",4057.74125417173,-0.258116058560069,0.199739906521567,-1.2922  
6083587958,0.196266829954544,0.32707783337211,-0.288459437446103  
"Olfr814",1.52287653237199,-2.4195677683708,1.50996385356547,-1.602401  
11884632,0.109066937586985,0.210449000402873,-3.77092524112351  
"Olfr539",2294.12830297521,0.499333112351576,0.281433108586736,1.77425  
149037745,0.0760215606207011,0.159809598618809,0.915663170484096  
"Zfp945",1041.09277926106,0.065294673552361,0.12303842550334,0.5306852  
17120147,0.595636931768351,0.718360171684253,0.0215984466058082  
"Ntrk3",1338.91610458805,-1.99612181671514,0.544362456285376,-3.666898  
39401543,0.000245510290776945,0.00198031064414007,-12.4248633533144  
"Mfsd4a",2300.39424034032,1.12351633617235,0.300939513497768,3.7333626  
3860441,0.00018894025521176,0.00162217397451295,7.21745553977969  
"Gm8129",0.181796151909741,1.32180344676081,4.78471990596175,0.2762551  
35669248,0.782352112050876,NA,NA  
"Pde1a",1639.80083670917,-0.160049183196292,0.203192398854108,-0.78767  
3082747585,0.430887954172822,0.57330895304314,-0.0890402457147117  
"Gm8991",7.49540035025914,-0.315156098378012,0.764975854565812,-0.4119  
81759289501,0.680352793001972,0.784941938340382,-0.0763136397914681

"Skap2",3308.04418396979,0.390226658832367,0.190139041088862,2.0523226  
4030402,0.0401383171346625,0.0981460882231814,0.905832446257862  
"Mtfmt",1056.35642363795,0.321288589544635,0.168019799922389,1.9122067  
1428631,0.0558496852569216,0.126519944596196,0.664217674352492  
"Tafa1",31.7911039680318,0.46317697875878,0.454573201395038,1.01892715  
482861,0.308237550885643,0.453107340709308,0.366663043831809  
"Gm12715",0.404260912009672,-2.02920953155583,3.79591752132328,-0.5345  
76823694639,0.592942513387477,NA,NA  
"Lep",307.802930869449,-4.52218218412201,1.84057080487716,-2.456945515  
02126,0.0140123936757975,0.0439886736259378,-14.1264971501475  
"Il1rapl2",0.402279688428681,-0.66973080196497,3.80914255476895,-0.175  
821931664512,0.860433839063155,NA,NA  
"Olfr1130",0.166636546758826,-1.37599865859614,4.76946484053433,-0.288  
501688261105,0.772962738381587,NA,NA  
"Vmn1r71",0.115855348036949,-0.0844769068188154,4.78471990596623,-0.01  
76555594640928,0.985913633525894,NA,NA  
"Hnrnp",9903.51985514248,0.119316948220315,0.1794025588196,0.66507941  
1382843,0.505999702466809,0.640689797954272,0.0531210834527217  
"Ddn",1508.87227892938,-0.364515360609416,0.508560950544954,-0.7167584  
53866377,0.473523151041172,0.611278760527063,-0.179415257801123  
"Gm6802",39.9233283779842,-0.183313877866088,0.387317598042984,-0.4732  
90856889348,0.63600568429052,0.750656103649912,-0.0525758225238922  
"Ppp1r2-  
ps4",1.04887992992422,-0.555183671638679,1.29788327100224,-0.427760865  
744081,0.668825231374823,NA,NA  
"Foxb1",0.441771530966112,0.409637488824952,4.66286837784315,0.0878509  
654639732,0.929995129736848,NA,NA  
"Sept9",3805.49273798607,-1.02210641076742,0.203983634663811,-5.010727  
51474389,5.42246483720243e-07,1.67820983167894e-05,-11.2382621754578  
"Tpt1-  
ps5",0.254532154087722,0.896091983017867,4.78471990595287,0.1872820145  
44467,0.851439523808407,NA,NA  
"Usp47",4215.83620656487,0.000699868078543838,0.127478716603491,0.0054  
9007785135383,0.995619573649849,0.997102596282539,2.03074373745986e-06  
"Zc3h4",2547.56239028693,-0.209229988467973,0.178170641329208,-1.17432  
359735057,0.240265434970036,0.37862244007482,-0.203207464517565  
"Naa38",1737.05340736151,0.637427712507709,0.221462393191728,2.8782661  
6212832,0.00399867607454892,0.0167796341480517,2.605542748826  
"Olfr224",0.589768608813285,2.20671334252935,4.43482586168578,0.497587  
371263892,0.618774906710191,NA,NA  
"Vpreb2",0.091991025955798,0,4.78471990596463,0,1,NA,NA  
"Cdyl",432.946095021817,-0.626813220606841,0.161101002777755,-3.890808  
93227929,9.99105841631368e-05,0.000990873128185576,-4.33561944414702  
"Rpl11",21087.8968176317,0.0266597847047054,0.166120940867648,0.160484  
190406469,0.872499674441671,0.920135116312274,0.00221902062601254  
"Vpreb1",53.1982285064597,1.57951056308865,0.286117774453575,5.5204908  
7514813,3.3805394933098e-08,1.9992397084915e-06,20.7275121256893  
"Slc27a4",2157.55902642625,0.0386307137875791,0.227058192712653,0.1701  
3574064895,0.864903386273486,0.915014646177368,0.00343099484482726  
"Olfr295",0.417367277553394,-1.0612977143516,3.11910357098065,-0.34025

7285530897,0.733662781277231,NA,NA  
"Tonsl",309.137599254083,0.362285856369486,0.290705654927316,1.2462291  
3324499,0.212680286351064,0.34707400596527,0.383377141952776  
"Hopx",606.974487304126,-0.514515861920014,0.237392142446666,-2.167366  
85813267,0.0302068922491061,0.0790675238385112,-1.30555984796838  
"CsF2ra",3600.69714460227,-0.853471771244313,0.324700283473029,-2.6284  
9099518944,0.00857646261046903,0.0299956779076628,-2.99287114791472  
"Eda",148.076022445113,-1.55375857116389,0.32065694448058,-4.845547860  
13058,1.26262768553191e-06,3.30450583735399e-05,-16.0311192885938  
"Zfp36l3",2.08163689985645,-1.52243543718257,1.31241828359228,-1.16002  
303245536,0.246039428730134,0.38516875001045,-1.45251565472886  
"Slc14a1",710.173149607619,-1.28236887745119,0.436668103766144,-2.9367  
1295519665,0.00331710982971419,0.0145866052006692,-5.42140886654581  
"Wdr83os",1977.72793255608,0.0959882510558375,0.275073900035547,0.3489  
54412045029,0.727123534678748,0.820644517201101,0.0189735417255901  
"Nrsn2",0.72538620927178,-1.07773452092035,3.14662086036609,-0.3425053  
63291517,0.731970608484308,NA,NA  
"Fxn",769.049033200131,0.704428700014584,0.266753266985482,2.640750038  
32258,0.00827227265046451,0.0291932619255669,2.48932236357664  
"Olfr959",2.34857639481903,1.57743820345631,1.13271867524895,1.3926125  
1529169,0.163736996368233,0.286249794242608,1.97320237299576  
"Vmn1r33",0.0810182756847091,0.4.78471990596022,0,1,NA,NA  
"Nkapl",103.682933091447,-0.627569978683406,0.322785711407021,-1.94423  
097586269,0.0518676039850056,0.119610221965137,-1.33265550159359  
"Olfr54",0.947017639901105,2.11104974158027,2.63951662248947,0.7997864  
92569697,0.423834510329046,NA,NA  
"Maml1",259.71140506437,-1.14981270526142,0.186583431301231,-6.162458  
78448388,7.16239769608009e-10,1.2039002610187e-07,-18.3194244403853  
"Tmprs9",90.8337788229734,1.55338708049275,0.581516889509572,2.671267  
35012428,0.00755654345910508,0.0272998859302633,5.59354921639275  
"Mrgprh",3.75543955078585,-2.9971361121867,1.20075830432606,-2.4960361  
3099214,0.0125589808620353,0.0403057620649945,-9.62458583212163  
"Ppp2r5d",1756.33955341592,-0.125326516774159,0.124662081043183,-1.005  
32989442673,0.314738024848113,0.459992654860093,-0.0973216495543924  
"Fxyd2",53590.6782184954,2.12842681882682,0.71338204317711,2.983572181  
53079,0.00284904825949071,0.0129973661589962,9.24377586200098  
"Gm8116",1.37467320233127,0.129788784256719,2.24742476472516,0.0577500  
018215696,0.95394776443076,0.971435395146548,0.0037613454822221  
"Zfp933",687.157427769901,-0.190367343889761,0.141578691326242,-1.3446  
0448889936,0.178752992967156,0.305864489414094,-0.225511653223071  
"Olfr365",326.129337826159,0.0514297636084785,0.230347041261852,0.2232  
70780153042,0.823324767336703,0.886720410601582,0.00618317183482687  
"Actg2",268.379219183021,-3.95192481477688,1.0328734118159,-3.82614633  
077734,0.000130164933288414,0.00122193349506861,-26.5068276790727  
"Gckr",18.3165267915666,1.15140533817978,0.690788569409194,1.666798480  
99475,0.0955544824017699,0.190689350968454,1.90800485059959  
"Max",3269.45126541597,-0.220387732553386,0.085716277162343,-2.5711304  
7660693,0.0101367128331458,0.0341947451246844,-0.74395918787429  
"Bcas3",1285.86863676254,0.485702390952009,0.183458355157038,2.6474803  
5343637,0.00810940716549615,0.0287876964389303,1.72317843486865



"Hadhb",12909.5004287281,-1.15120604796683,0.623490088490921,-1.846390  
29427585,0.0648355554644167,0.141516137965431,-2.2510009827164  
"Plac8l1",0.827105460772831,1.80323146420631,2.22310579365169,0.811131  
647155806,0.417290073490587,NA,NA  
"PtK2b",2636.19733062519,0.362964552982095,0.136253472102558,2.6638921  
370671,0.00772423256993121,0.0277361117216425,1.30123519718336  
"Olfr286",9.05858361909057,0.632147061086274,0.672599177890586,0.93985  
7023121589,0.347290904535691,0.492077469416241,0.448267565595889  
"Gm7331",9.7140171774495,-0.691736428904197,0.822402429894167,-0.84111  
6713375001,0.400282552858832,0.544428287215633,-0.420588925801208  
"Olfr979",0.17533137917973,1.37190909366337,4.78471990596623,0.2867271  
48218789,0.774321248717889,NA,NA  
"Mbtd1",2814.44216627632,0.0785568429329462,0.17176306857672,0.4573558  
42463059,0.647415297926036,0.759753444415398,0.0215843813548492  
"Zfp426",994.036458350992,-0.189117345813216,0.133165947754226,-1.4201  
6295458848,0.155560245855846,0.275756600686392,-0.243627902442614  
"B3gnt8",264.065324367354,-0.739521656303614,0.21834306339105,-3.38697  
114906344,0.000706688189905169,0.00450000206622175,-3.99613647802111  
"Plg",22.7004811642135,1.60271006545315,0.492185148906707,3.2563153703  
7079,0.00112868309299994,0.00645368414877211,8.08263374287941  
"2610301B20Rik",833.827653677337,0.300898210242804,0.118580908756945,2  
.53749286792492,0.011164964305627,0.0369411970186858,0.992491051824828  
"Gm5528",0.0826339311449979,0,4.78471990596623,0,1,NA,NA  
"Kbtbd2",1460.38220095827,-0.312213966968656,0.0895080946968303,-3.488  
10873503838,0.000486450207711878,0.00338864099677249,-1.77566271302191  
"Olfr727",2.78637796909057,0.674875808860026,1.03411456071052,0.652612  
229341718,0.514006299490947,0.647798773671675,0.293014315877521  
"Nhs",1484.21824208943,0.992109814354249,0.307942194400803,3.221740418  
79745,0.00127414514398077,0.00707181383926476,4.91256893236556  
"Arhgef12",8567.29592927045,-0.120874834333947,0.0984935821820577,-1.2  
272356396838,0.219734037722892,0.355514380796629,-0.125007493940358  
"Fcgr3",1378.3540205646,-1.24328162779704,0.377896168727772,-3.2900085  
5442034,0.00100184336959223,0.00588127190983208,-6.38547234634046  
"Znhit1",2078.34138913965,0.316360291671723,0.161786978035549,1.955412  
57716186,0.050534392809974,0.117355835041552,0.677816045495318  
"Uqcr10",11607.5111735683,0.678731982809148,0.412479060228075,1.645494  
39778556,0.099867897017227,0.197147337859866,1.10212765558396  
"Tcea2",564.404733286243,0.452887117615115,0.224896829659267,2.0137550  
1069209,0.0440352612846105,0.105541314181887,1.01838588470288  
"Fbxw26",0.42649405305613,-1.92281191814631,3.78528139627933,-0.507970  
667659292,0.611473914058055,NA,NA  
"Trp53",2394.1044206798,-0.371679284366919,0.173372481665757,-2.143819  
36969371,0.032047362706829,0.0826424385739653,-0.926682665527577  
"Ccfdc28a",785.53623344126,0.727610195461013,0.211714515259512,3.436751  
58299436,0.000588735304446596,0.00390713443366226,4.03456292101581  
"Tor4a",1064.08958037722,-0.728091359505995,0.190926935765795,-3.81345  
542778272,0.000137037249430262,0.00127114761626606,-4.85479316055486  
"Ccfdc154",6.61011595246109,-0.760903538996024,0.687044933903031,-1.107  
50185533486,0.268077010581997,0.410235917337482,-0.677982460152184  
"Gm5292",0.681215001257965,-0.550362140163931,2.77282986585695,-0.1984

83919601695,0.842666464774419,NA,NA  
"Nsmce2",893.480555759797,0.144768780236237,0.106250705178459,1.362520  
65332727,0.173033630711101,0.298540813344399,0.17500354127518  
"Calcrl",1681.2824933009,-0.753081992959,0.258813159035859,-2.90975155  
886358,0.00361716162281517,0.0155827258775188,-3.13402021849555  
"Olfr935",0.652017781336121,0.603789059049326,2.42263242187044,0.24922  
8505983239,0.803184030392337,NA,NA  
"Syn3",296.771998202969,1.05321643136262,0.477023921944293,2.207890176  
80671,0.0272519297768979,0.0731806135382821,2.75397637652515  
"Rnase2b",0.751280302487965,-2.70308300369963,2.45942527858558,-1.0990  
7100135775,0.271737097474605,NA,NA  
"Olfr39",4.02858823439923,1.02324471704159,0.813743786172308,1.2574531  
8665317,0.208589580313624,0.341972558391914,1.09796694123604  
"Sohlh1",0.721804037390028,-2.06989912659742,1.96977844540857,-1.05082  
839718458,0.293337410953546,NA,NA  
"Krtap8-1",0.131755383980079,-0.060338421799434,4.78471990596055,-0.01  
2610648686931,0.989938424791165,NA,NA  
"Clec4a4",1.4838668690414,-1.4083781932168,1.59349987904822,-0.8838269  
84698616,0.376789617114698,0.522038226000312,-0.915466196225254  
"Gm7361",0.146524777302106,-1.09734767016741,4.77914581206694,-0.22961  
1673993435,0.818393534692214,NA,NA  
"Rnase11",0.0800253872252022,-0.0587217019638569,4.78471990596623,-0.0  
122727564241817,0.990208002943932,NA,NA  
"Reg1",0.476425840759333,4.03669965040585,4.6709699922231,0.8642101441  
72778,0.387472460621763,NA,NA  
"Stfa2l1",1.84068146777963,-2.70021978008411,1.75710146135259,-1.53674  
664751887,0.12435536309889,0.232751443442174,-3.93633762705548  
"Gm16379",0.108229817038987,-0.909962624367568,4.78339755770097,-0.190  
233534509919,0.849126134161093,NA,NA  
"Samt2b",6.85791661342916,2.44977401534838,0.733359260565533,3.3404828  
2619248,0.000836328530396477,0.00513436199170986,12.9147178954436  
"Krt4",22.3199347307128,-1.47968893018968,1.01651046613039,-1.45565538  
13189,0.145487910103689,0.261859436093578,-1.98270536833161  
"Taf1b",531.676736781536,-0.17082876811771,0.125880294773201,-1.357073  
14973716,0.174757968932908,0.300983206276287,-0.205114240060922  
"Cdh24",302.166308831955,-0.597843132014899,0.244868007444111,-2.44149  
139062747,0.0146267370862152,0.0454055277355556,-1.84860355732631  
"Zfp637",976.309207298185,0.0393804610854864,0.143671187500259,0.27410  
1312661701,0.784006765097474,0.860390831646905,0.00592158234205161  
"Akap17b",637.902556367156,0.820571515920131,0.270391086230376,3.03475  
801425272,0.00240728749112902,0.0114986015438593,3.66428660323361  
"Rcan3",944.996125211677,-0.0660814170155608,0.177247284979513,-0.3728  
20475208965,0.709282062755134,0.807331095131325,-0.0141428384330569  
"Flot1",3452.68914374135,-0.225632363771024,0.106152962480136,-2.12553  
996138586,0.0335415832958756,0.0856349078306904,-0.554528148956096  
"Olfr1385",5812.59259968922,0.547301237750528,0.304634794745058,1.7965  
8150412054,0.0724020828798743,0.15394719869049,1.02408030344234  
"Ndufs8",6471.16806316157,0.852393287799657,0.272179296596405,3.131734  
47965666,0.00173776958248713,0.00899231192126701,4.01595320397994  
"Myl3",20.3978762065256,-1.44776646822729,0.755323014737921,-1.9167514

2949224,0.0552695181215937,0.12543883882375,-3.00547194870956  
"Kcnh7",19.7250327758744,0.363664985409204,0.583770011699317,0.6229593  
47210384,0.533311236815042,0.66550415970686,0.148088160780697  
"Fdps",2408.22441222889,-1.91568668205818,0.445419149349472,-4.3008628  
7232153,1.70134322611346e-05,0.000253227406280612,-15.864227910915  
"Rps3a3",7.76448276362499,0.658679754536334,0.629199685460468,1.046853  
28005892,0.295167252495677,0.439560917219943,0.541420903379836  
"Olfr767",108.485114530316,0.663769547772889,0.296725874923243,2.23697  
898925934,0.0252877132910897,0.0690850264466397,1.77386919988795  
"Slx1b",1962.92722661219,0.141750756348983,0.267403305664916,0.5301009  
87332639,0.596041914566658,0.718626344930788,0.0468363980502015  
"Rps26-  
ps1",4.02177165971305,0.458999393792521,1.15767356729877,0.39648429985  
6235,0.691747787812906,0.793954460017426,0.105904551235686  
"Rpl13-  
ps6",2.53966683816612,-0.0528617573914512,0.977708734905435,-0.0540669  
787475756,0.956881800891825,0.973609630735731,-0.00141377953304237  
"Nrm",193.176521325272,-0.985122583894023,0.315546831136158,-3.1219536  
5850131,0.00179655215580835,0.00919642266577875,-4.61918138916441  
"Eif4a1",16804.487452486,-0.185492987608954,0.136728895549102,-1.35664  
803598403,0.174893070940783,0.301136091240143,-0.222627382689258  
"Rgs3",1927.14438026952,-1.14721232489749,0.169271664166577,-6.7773441  
6179986,1.22405066474345e-11,4.67971369826819e-09,-22.0035655511003  
"Atl2",2346.97617641879,-0.219337366906358,0.290137656863424,-0.755976  
901714642,0.449663044632055,0.590445824246468,-0.115563900088154  
"Shisal2a",0.677933065615316,-1.58708587760029,2.30882278138354,-0.687  
40047542724,0.491830398118458,NA,NA  
"Nkapd1",1272.08623092479,0.287078787575814,0.18459098843628,1.5552156  
1484521,0.119894726656354,0.226368488461856,0.426481699738888  
"Olfr847",0.193615207952986,-0.0652124142062313,4.7847199059648,-0.013  
6293065190577,0.989125723419008,NA,NA  
"Dbp",3977.74494439469,3.82106627220575,0.229809685764539,16.627089756  
873,4.43624911429183e-62,8.64979852304622e-58,502.059065638232  
"Sc1t1",691.453427265044,0.248423916051172,0.101189035978449,2.4550477  
5936475,0.0140865872017485,0.044164701279899,0.77504024255834  
"Rpl13-  
ps3",0.262719079131596,-0.0500198795957241,3.9848531084087,-0.01255250  
27485138,0.989984814865866,NA,NA  
"Zfp874b",744.996453974789,-0.0467961286633417,0.0947984243944226,-0.4  
93638253613157,0.621561679727007,0.739607569346831,-0.0141153757799196  
"Zfp341",234.509769801082,-0.113037279907464,0.124438941950102,-0.9083  
75450128704,0.363679891751406,0.508632576739703,-0.0764165218295972  
"Kmt5c",4073.70300378119,0.23138590864378,0.155300320248681,1.48992550  
867419,0.136243823535733,0.248874093245243,0.321813409855136  
"Kcng2",48.4556378826632,-1.04383505507796,0.477225598100284,-2.187298  
9613994,0.0287207065112777,0.0761278324574352,-2.68823157539659  
"Hydin",6.92762253960249,-0.00572417650875225,1.45604621264782,-0.0039  
3131513205397,0.996863272432298,0.99788685110817,-1.21088356430825e-05  
"Ntng1",44.2839733478891,0.445330700450742,0.417069947076823,1.0677602  
248064,0.285628684219794,0.429787628099826,0.376065780446673

"Olfr1393",46.8608165803273,1.86052680702392,0.48403930001435,3.843751  
5444898,0.000121167679948576,0.00115598222147837,12.5823797851577  
"Tnip2",1621.04596507141,-0.480717682432805,0.172700706144356,-2.78353  
049715377,0.00537708071189956,0.0210062752395547,-1.85698071110101  
"Olfr1029",4.13435644614037,-3.9394645220475,1.36762134750244,-2.88052  
283568239,0.00397016190948711,0.0167120502830699,-16.1188124938636  
"Zfp422",1497.82742422646,-0.0556149660933257,0.115025729372972,-0.483  
50022552775,0.628740599673984,0.744876911680844,-0.0163806259747614  
"Irak4",734.066456612591,-0.613179466334347,0.136978203728364,-4.47647  
472111927,7.58856485881344e-06,0.000137001701497356,-5.45454849714379  
"Olfr1507",0.122459066531526,-0.543905164975829,4.78471990596623,-0.11  
3675445097134,0.909495078296284,NA,NA  
"Ube4a",4556.8635322516,0.256695975799236,0.157880852005693,1.62588415  
592019,0.103974301246231,0.203237185533735,0.409014639587527  
"Tsks",4.01833916113311,-0.384376221096295,0.997005397641314,-0.385530  
732336696,0.699844241729366,0.799997832282299,-0.085772116541497  
"Ptp4a3",1780.44393087371,-0.9404056740708,0.212669002403119,-4.421921  
68790184,9.78269158466263e-06,0.000168055436579517,-8.17326945539117  
"Zfp930",488.146942576525,-0.224446862802241,0.211000074958003,-1.0637  
2882970261,0.287451560334002,0.431498231071859,-0.188645762972823  
"Dsc3",0.545359310546804,-0.237995112493035,2.24374675199508,-0.106070  
398667504,0.9155264970641,NA,NA  
"Tmem40",131.654711644292,-2.13555031890406,0.590363051091179,-3.61735  
090798261,0.000297633669665736,0.00229650229170657,-12.9763897403804  
"Adamts14",230.949219263979,-0.676656896931378,0.284270484156511,-2.38  
032766201233,0.0172972498451557,0.0514510720794578,-2.00772490485489  
"Mug1",13.1460139658163,0.349472287703404,1.16259960444889,0.300595567  
352756,0.763722911966807,0.846853351770291,0.0580919877828883  
"Olfr1265",22.7993806057431,0.832861233061181,0.46806116702075,1.77938  
545588478,0.0751765892752849,0.158515533436737,1.53404934366595  
"Rpl21-  
ps6",4.13156902866271,0.709149892695737,1.04583237644996,0.67807223094  
6721,0.497725896575488,0.63337743814966,0.323860789217556  
"4930453N24Rik",1637.8724201956,0.22681545451592,0.217775003053378,1.0  
4151280604196,0.297637612911279,0.44188975683729,0.185239012908297  
"Unc5c",302.072552495138,-0.202474163718617,0.243672817442192,-0.83092  
6345597212,0.406015239447097,0.549832278006633,-0.121108300494107  
"Grb2",3335.65582518087,-0.352230812023368,0.105263752468646,-3.346173  
81351938,0.000819350175582191,0.00505075367069124,-1.86267325165007  
"9430015G10Rik",786.807866146337,-0.306431281255335,0.193704383631569,  
-1.58195326048054,0.113660240888976,0.217333272222541,-0.4677132004171  
53  
"Serpnb12",2.94855665418398,-0.0212064598999709,1.270296071654,-0.016  
6941080691204,0.98668064758707,0.991307222479141,-0.000185148938163521  
"Hspa2",416.585433426644,-0.677986594650271,0.31151831737479,-2.176393  
99302026,0.0295258125821991,0.0777334990180553,-1.7318957260602  
"Ntm",144.424587971672,-0.670678779741448,0.507344440170516,-1.3219397  
4475415,0.186188216300116,0.314810744615802,-0.775159555592121  
"Zfp74",455.034090884966,-0.266327421621118,0.139992629633281,-1.90243  
888066663,0.0571138020747018,0.128800013052572,-0.545836549583688

"Taok2",6131.10501653398,0.074886918843311,0.176032125217111,0.4254162  
05996198,0.670533294178564,0.777061406828745,0.0188891694527702  
"Nptx2",13.3790338003198,-1.78811272177044,0.784061688798846,-2.280576  
57619998,0.0225735146905576,0.0632291896906325,-4.93695995299649  
"Fcr11",58.9957702457852,-1.1679021178953,0.537791277112672,-2.1716643  
0100095,0.0298809930860514,0.0784144822600042,-2.9731828994658  
"Atxn7l3",3057.50109229954,-0.124109214115742,0.102640104599443,-1.209  
16881953777,0.226597994113056,0.362742831626959,-0.125854332218905  
"Chpt1",59800.6301400054,0.515295206652771,0.597175307879937,0.8628876  
6439816,0.388199233590814,0.532473349036489,0.324750598030012  
"Kif13b",2535.24983598614,-0.169083583899059,0.127578203104688,-1.3253  
3285298204,0.185060777101653,0.313385012326562,-0.196191532943443  
"Gm10073",0.276101293764134,-0.0391835094688605,3.98198537627143,-0.00  
984019421627067,0.992148787664466,NA,NA  
"Vmn1r213",21.4150999026224,0.0584538242926026,0.351651586764301,0.166  
226533571088,0.867978679150333,0.917232035449201,0.00505010652720973  
"H2aj",7404.69106840601,1.26741655488872,0.292777163874917,4.328946076  
64891,1.49824609221034e-05,0.000231139540596298,10.6114311109605  
"Ctf2",9.22431077986044,0.948842176112199,0.805106986732956,1.17852930  
324516,0.238585657235992,0.376706060797423,0.926345199493009  
"Rpl3",20660.1161967083,-0.452159181492427,0.282363867867969,-1.601335  
13153267,0.109302711813546,0.210841341011131,-0.703853303512972  
"Dhps",948.83336407148,0.293277359124444,0.154633549372937,1.896595921  
86644,0.057881289250307,0.13012445264643,0.598069948284059  
"Tmem26",512.653497922067,0.712861127503141,0.418239708170038,1.704431  
96467927,0.0883004164604746,0.179397886854885,1.22480171062191  
"Olfr193",1.14632240292972,3.59580170961773,2.09304909055432,1.7179729  
4475564,0.0858015502662925,NA,NA  
"Alox5ap",1151.3760069974,-0.924905683477121,0.42062419250768,-2.19888  
846136741,0.0278858542751288,0.0743655716730393,-2.40360992006673  
"Gm12222",0.202287268244837,0,4.78471990595691,0,1,NA,NA  
"Psm3",7099.78988754083,0.226972925677876,0.17511350717467,1.29614744  
938823,0.194924690288868,0.325512860474052,0.25474381400846  
"Olfr748",1.25151663210912,-1.36069412984856,1.53494771151929,-0.88647  
5884251296,0.375361143683117,NA,NA  
"Rp2",1249.84224580247,-0.420118183562945,0.20723040896142,-2.02729988  
165568,0.0426317536177862,0.102900957172517,-0.955343848414699  
"H4c1",7.31595081470492,-0.320161719605332,0.568902980016961,-0.562770  
333169615,0.573591284199669,0.699642597594282,-0.114357171663585  
"Amd-  
ps3",1.48378350289514,4.86813466347196,1.62632582685053,2.993332936794  
95,0.00275948538913099,0.0127137160012467,21.2497674063999  
"Prmt7",904.199224277206,-0.0861003373111197,0.139336060887053,-0.6179  
32908128595,0.536619565386673,0.66817857372178,-0.0347156400959359  
"Olfr60",6.54758165305151,-0.994189834757831,0.664838312363724,-1.4953  
8589499025,0.134813759545111,0.246955907892763,-1.390419688572  
"Gemin2",466.448323519699,-0.057344983511264,0.133830458102852,-0.4284  
89779712127,0.668294572871366,0.775665669494964,-0.0145675577595433  
"Tpt1",78207.4359812052,0.341600764689418,0.127405327407408,2.68121256  
497439,0.00733559031038387,0.0266906232383397,1.23777088759535

"Gm2710",0.0919724702238145,-0.0632874436828631,4.78471990596623,-0.0132269902787722,0.989446696394074,NA,NA  
"Atp8b4",310.321789112333,-0.402712319844881,0.356493603328448,-1.12964809490242,0.258624536602667,0.399703647327108,-0.369300039046545  
"Serpnb6a",2658.94309763616,-1.05292224456665,0.320911448974359,-3.28103670944684,0.00103426282219352,0.00603192545161045,-5.38115814071232  
"Pop5",2008.2523994973,1.07641539779989,0.212490957735372,5.06569977975447,4.06902778455414e-07,1.34699327238093e-05,12.0720531121218  
"Klk1b7-  
ps",4.62788491010431,2.66080576074287,0.7495256291338,3.54998636113066,0.00038525110990646,0.00280913468248173,15.6319113154266  
"Zdhhc8",1643.41010666583,-0.286126734978322,0.120859659847769,-2.36742959014381,0.0179121279368081,0.052785154727186,-0.841649026589693  
"Kif27",110.321122925518,0.576004925622653,0.558289835446281,1.03173099177457,0.302198154741155,0.446722005254968,0.464155592209335  
"Klk1b22",12.4899534326181,2.10334632649676,0.873608602611067,2.40765294688058,0.0160554354889218,0.0486478447805744,6.35872676034282  
"Myh13",4.85169821675011,-2.17342632199848,1.75419956376051,-1.23898464399299,0.215351184961378,0.350318488601447,-2.27973419092863  
"Slc35e3",2422.8251760427,0.958890854047572,0.207615629973267,4.61858702146385,3.863619445253e-06,8.152906054496e-05,9.02752687779419  
"Cxc11",58.3183931698458,0.43033611805756,0.511116752533355,0.841952677005,0.399814442805668,0.544004326994063,0.261987801621054  
"Lrrc10",0.165795004122355,-0.0577379155598086,4.78471990596623,-0.0120671463940477,0.990372043863921,NA,NA  
"Cxc117",44.0680796746574,-0.344571118628015,0.692661957014647,-0.497459280300461,0.618865210965218,0.73707372081118,-0.105117402717941  
"Gm11353",0.973392103484694,0.00538427650818502,2.33627967649213,0.00230463696720993,0.998161167373389,NA,NA  
"Slc10a4l",16.6897353082501,-0.217505019932718,0.877394067008053,-0.247898895275664,0.804212634677049,0.875323096512956,-0.0289634486235489  
"Olfr57",17.3397891258292,0.760007695113082,0.541873175846578,1.40255640801135,0.160749158584063,0.282342770387538,0.961131152232219  
"Zfp462",906.291095213618,-0.279516638559421,0.209931370210416,-1.33146674686713,0.183035479612606,0.311177045582018,-0.326305837223624  
"Pcnx2",9.64782393014766,-1.88635192967315,0.743288708488292,-2.53784553448905,0.0111537201418218,0.0369290601673019,-6.22261568830093  
"Arrb2",3488.97911804665,-0.733842445092301,0.335964424657116,-2.18428616613577,0.0289412266661456,0.0765250932379314,-1.8860753089718  
"Pyroxd2",4420.07556523118,1.69051088892081,0.414532031893621,4.07811883969111,4.54015595555883e-05,0.000538139579461922,12.7251391386995  
"Casc4",2042.2546359777,0.806150064428045,0.25312177570373,3.18483094623836,0.00144838592850665,0.00782939529637445,3.90972301380015  
"Cend1",27.040069356716,0.0377940244114152,0.331743691676568,0.113925374798874,0.909296950340478,0.944413356295671,0.00216149056919967  
"Alyref2",243.012332423807,-0.3998012756854,0.152372362986072,-2.62384377225904,0.00869436552066601,0.0303423552750932,-1.39738968813529  
"Vmn1r228",33.8251357366977,1.51451527465238,0.489645868732551,3.09308292250622,0.00198088776603183,0.00992377946096828,6.98618852436266  
"Scrt2",0.474174042407128,-1.49892843440353,4.72911197412413,-0.316957

695779903,0.751275702307441,NA,NA  
"Pwwp2b",764.745374599936,-0.975845016217278,0.239244888247609,-4.0788  
5419565293,4.52582090348504e-05,0.000537107057379229,-7.34744268501156  
"Gtf2i",8799.33156708537,-0.0366659488346931,0.188429896541529,-0.1945  
86684531837,0.845716528004961,0.90127792211635,-0.00381111772908964  
"Armhl",11.3541897346108,-0.520958888080048,0.606953495021466,-0.85831  
7634469875,0.390717094549857,0.535095065235394,-0.325761248164204  
"Nrg2",40.5655833756994,-0.589633141508131,0.392435523583592,-1.502496  
85890767,0.132968838550506,0.244241772402993,-0.831144915016184  
"Ap2a1",2723.50935908443,0.114444211506858,0.0963872933443117,1.187337  
12231179,0.235094670940421,0.373036775227565,0.112850950219503  
"Sp7",14.4969211884845,-1.63655687305263,0.742354441499692,-2.20454917  
700295,0.0274857454769239,0.0736149814984975,-4.26962422539378  
"Ppih",670.776651277517,0.120443919561782,0.131189764206874,0.91808930  
5899303,0.358572113103787,0.503597137599773,0.0826219586310086  
"2610008E11Rik",1241.96920929494,-0.142949071241902,0.158215457520809,  
-0.903508882645683,0.366255876082744,0.511191312292418,-0.095920452248  
0958  
"Muc11",135.872444924826,-2.23668018588819,0.736165635617167,-3.038283  
88296481,0.00237929698746412,0.01139841097336,-10.0075363781098  
"Zfp941",72.4289103439907,0.616404453709539,0.282808478750458,2.179582  
65053798,0.0292884119999471,0.0772023059584925,1.57881272450362  
"Acnat2",1519.62466544035,1.96999637374058,0.733698103723166,2.6850231  
229218,0.00725247884893344,0.0264959401529894,7.15259144012477  
"Tmc2",5.01808557791393,0.29220961380424,0.83580420102131,0.3496149139  
32205,0.726627716777543,0.82022736187857,0.0579082622637345  
"Zfp937",327.388064295462,-0.081899807727468,0.137631302911767,-0.5950  
6671807047,0.551798874629349,0.681810802124401,-0.0313678782724182  
"Caln1",3.25764251390796,-1.94388616126737,1.46178312399488,-1.3298047  
6334613,0.183582606114112,0.311693978928332,-2.2660530420186  
"HnrnpC",7907.17777714793,-0.398789173976179,0.149212935358743,-2.6726  
1798058859,0.00752619040677272,0.0272400714308675,-1.43686378387953  
"Bckdha",10910.9686649687,0.538590756831021,0.464350449117385,1.159879  
90935456,0.24609770354715,0.385229048150477,0.513770982034821  
"Rpl36a-  
ps1",5.68760106285017,-0.236679259825177,0.803093222817312,-0.29470957  
1816442,0.768215750522677,0.849989526276341,-0.0384677763275088  
"Zfp128",121.060719249337,-0.702006868448824,0.205352787619574,-3.4185  
4072976757,0.000629578944050182,0.00412130382311354,-3.85513088271731  
"Chst8",248.573093253943,0.490136868775267,0.32333126618413,1.51589691  
45166,0.129545420637192,0.239533106835844,0.700436777079212  
"Olfr1369-  
ps1",8.34201325829367,1.134013539172,0.601873323194109,1.8841398936803  
7,0.0595460552419321,0.132795263079857,2.28951290645098  
"Cyp2a12",2.1134917327008,2.68956830456288,1.26314232023866,2.12926782  
791563,0.0332321079606765,0.0850675647915545,6.6279286117882  
"Rps16-  
ps2",3756.28568924505,-0.181391096468959,0.245444013260091,-0.73903247  
4492435,0.459887278192879,0.59959091609527,-0.0927829358093141  
"Zfp868",564.799759155723,-0.0434292509211059,0.124303453582527,-0.349

380887412532,0.726803380007336,0.820330668792072,-0.0086010660972545  
"Sntb1",649.838795565519,-1.80177826556174,0.500619131470133,-3.599099  
89910011,0.00031932051375724,0.00242544268688689,-10.8498424509604  
"Rps10-  
ps1",1.72318196791669,-1.24506591999639,1.64089473638127,-0.7587725722  
99298,0.447988615545789,0.588756190336407,-0.659565104236551  
"Trim5",658.957685649806,-0.647825131105682,0.235850231906748,-2.74676  
486797699,0.00601862662353739,0.0229067308033832,-2.44639790787286  
"Sycp2",34.5014318387855,-0.471701774215199,0.448877238978975,-1.05084  
805656028,0.293328380229766,0.437340877750839,-0.390117342591544  
"Rnf14",3710.18269703302,-0.165815494679961,0.154881785751747,-1.07059  
389763067,0.284352068523558,0.42842876377964,-0.140550320460987  
"Kng2",8483.09980107377,2.08891403350492,0.478021406461616,4.369917341  
08179,1.24293576728617e-05,0.000200951588644657,17.7817690189623  
"Dppa5a",1.12502089628294,0.00807346971958189,1.49928787812639,0.00538  
486960200801,0.995703516446692,NA,NA  
"Gm10080",4.45916878669055,2.22800985374558,0.980537852767642,2.272232  
37476948,0.0230724788401929,0.0642759240500187,6.1149293372172  
"Adgrg3",1515.50470586583,0.590148694727076,0.478006337643629,1.234604  
33105607,0.21697779633214,0.352320269193118,0.615651770739184  
"Wtap",3382.57311183268,-0.0298059705552031,0.0873080905825683,-0.3413  
88413792135,0.73281119623576,0.825200849217721,-0.00572657548029937  
"Irak2",2601.15493061176,-0.541983484911679,0.213022251695044,-2.54425  
760970532,0.0109510287279314,0.0363815229403998,-1.79596755469881  
"Samd5",839.080944585617,0.0546482198824262,0.347024420736655,0.157476  
582675134,0.874869261937115,0.92193199002794,0.00444201615969113  
"4930522H14Rik",0.190806818675591,0,4.78471990595965,0,1,NA,NA  
"Olfr715",145.860582205139,0.397505715573647,0.219235004412597,1.81314  
893868658,0.0698088528170078,0.149756080121688,0.754762960226958  
"Nlrp9b",1.98287873578505,0.267181715070324,1.72420851280825,0.1549590  
51115669,0.876853599760251,0.923069811786239,0.0213880062637616  
"Xcr1",340.687710886954,-1.24034697717653,0.512034937670722,-2.4223873  
9180366,0.0154189036909621,0.0470873259351846,-3.79019201521228  
"Zfp266",2079.34077194677,-0.525659144429451,0.188528949248741,-2.7882  
1447063765,0.0052999443998248,0.0208016907922234,-2.03573121141163  
"0610040J01Rik",1525.47926131583,0.712048055332253,0.236563617270432,3  
.00996435355596,0.00261278351992267,0.0122314653232778,3.1356770114628  
4  
"Tor3a",1398.07648171512,-0.321588034040659,0.212661561297043,-1.51220  
574173942,0.130481530815342,0.240693366872048,-0.458015805604867  
"A930017M01Rik",24.9850024752731,-1.26507900887696,0.81965923832266,-1  
.5434206676738,0.122728742260831,0.230380766015374,-1.85716360737518  
"Dcc",2.28020099878605,1.10383380611142,1.38191132480521,0.79877325433  
0928,0.424421901584545,0.567506393985424,0.625325452701812  
"Tmem219",1210.88731924313,0.0502903350431148,0.164651670759968,0.3054  
34708381604,0.760035090460798,0.844657846202704,0.00849019788961236  
"Tnfrsf19",217.394432854086,-2.70245583535171,0.577633459535606,-4.678  
49600943195,2.88986793811452e-06,6.4322654175065e-05,-26.0830191429317  
"H2-  
Q7",9483.1973616281,-1.11980158030818,0.271377430096677,-4.12636223988



581,3.68546603011086e-05,0.000457826346358897,-8.61017742133175  
"Ces4a",3.60834908107971,-1.48368769637043,1.32318740422533,-1.1212982  
3155251,0.262160938068186,0.403760977129028,-1.3456041716256  
"Rpl21-  
ps3",0.131995773173077,2.43919315343647,4.73867308385202,0.51474180857  
6859,0.606733453791603,NA,NA  
"Fam78b",264.202787734739,-2.18389858207614,0.424119188035982,-5.14925  
672707565,2.61520724736345e-07,9.51330427408445e-06,-25.25202465042  
"Mfap2",533.975459707352,-1.47425327781813,0.354148282045314,-4.162813  
57996111,3.14350002697041e-05,0.000404545737646677,-11.5179660392505  
"Fhit",280.072821334387,1.4520297693216,0.243912613546928,5.9530737185  
1943,2.63152690357218e-09,3.09850777959792e-07,21.7618242823959  
"H2-  
Eb1",36043.2332163757,-1.24350790394158,0.414513801525271,-2.999919180  
89553,0.00270051250614889,0.012507029179309,-5.4483856848345  
"Ifitm2",3767.96969599085,-1.0438300316924,0.217993115467029,-4.788362  
37307812,1.68147818395703e-06,4.09818270384927e-05,-10.5451695483712  
"Layn",117.974562934603,-1.09399229370212,0.357862585431438,-3.0570178  
0023525,0.00223551000234152,0.0108906675428905,-4.94468002415835  
"Eno3",883.134304930877,0.444339970945651,0.212422263745283,2.09177683  
690662,0.03645848333782,0.0913124367411748,1.0635136269918  
"Nr1h2",4102.96336178539,0.0415300600273982,0.121801595133229,0.340964  
828760836,0.733130059436666,0.825369241809349,0.00797063297177699  
"Cyp2c70",2.60905418564257,-0.192355234499943,1.18410850249089,-0.1624  
47304529361,0.870953621880514,0.919030940546935,-0.0162416083960991  
"Ang4",1.58752112420571,-3.01966887062162,2.0001366696827,-1.509731268  
06412,0.131112009318069,0.241559289207569,-4.28986338705781  
"Nkpd1",11.4118523285357,-1.94678552483225,0.59173602269594,-3.2899560  
7866279,0.00100203022281578,0.00588127190983208,-9.99865585973377  
"Rpl35a",16164.9765555132,0.275757693275263,0.155061339414411,1.778378  
12001793,0.0753417737537003,0.158829484771289,0.507373218734874  
"H4c9",273.961788029369,0.653091196033416,0.318395810956613,2.05119280  
32948,0.0402481744735944,0.098341879259019,1.51471787715552  
"Marf1",4812.30507962546,-0.0480950131365693,0.129116960436423,-0.3724  
91832010337,0.709526692298589,0.807368060385607,-0.0102911607331918  
"Atp8b2",1626.22772293836,-1.00810504117591,0.191821259586362,-5.25543  
958657012,1.47671323595516e-07,6.23224127157005e-06,-12.0829197313279  
"Plaat3",4316.21023406112,-2.18190339389568,0.608994136212494,-3.58279  
869074858,0.000339932575788968,0.00255316077146891,-13.0268865757775  
"H4c3",39.1026537479065,1.54611206482941,0.529113932086581,2.922077781  
49454,0.00347704695348294,0.0151464391195287,6.47819380644529  
"Mrps9",2378.21104272951,0.477065297471115,0.158849745308448,3.0032487  
4015233,0.00267114013634322,0.0124093138857327,2.09398651168637  
"Gm8894",0.0962662853640277,0.4.78471990596623,0,1,NA,NA  
"Slc9a6",1473.01007536238,-0.0618045878244362,0.202664669809136,-0.304  
959852561585,0.760396729711523,0.844991190921879,-0.0104096896583859  
"Vmn1r35",0.121228843431119,-0.554072280174515,4.78471990596623,-0.115  
800358445982,0.90781076642874,NA,NA  
"Cd302",1846.09514540084,-0.23485362086513,0.296389632737207,-0.792381  
361980236,0.428138343599251,0.570974076207172,-0.13161466314921

"Bloc1s4",842.801648195473,-0.153731363569746,0.189589459099183,-0.810  
864508502667,0.417443484020331,0.560713216549215,-0.0889406200577248  
"1700019A02Rik",1.49860012565896,1.13728708107193,1.91553866856558,0.5  
93716587263448,0.552701686903669,0.682514811701318,0.434410740544914  
"Plekhh1",977.34400928758,0.00829657338211708,0.180158615438056,0.0460  
514939124279,0.96326920720814,0.978046740493088,0.000184165827404263  
"Vmn1r47",29.6114299694745,0.729505332234221,0.352638218460666,2.06870  
751394631,0.0385735416835337,0.095348239825753,1.7144975895056  
"Gm12571",3.14736681488175,1.91568210944215,0.879010748623808,2.179361  
41559289,0.0293048301054564,0.0772247029863751,4.90613062895937  
"Gm10086",0.265457972355741,-0.0679146279382017,4.78471990595096,-0.01  
41940655405415,0.988675154523716,NA,NA  
"Ipmk",2872.90567733146,0.615417320335243,0.211019415054612,2.91640141  
34717,0.00354094608095749,0.0153459361383661,2.57053942803476  
"Rxfp3",2.42454114545002,-1.75363347107216,1.66503716900611,-1.0532098  
043907,0.29224484594086,0.436203881441466,-1.4548941651801  
"Nsa2",6202.33143471019,0.237414960710682,0.154273099392885,1.53892649  
881922,0.123822241148852,0.231964455987731,0.3469038854715  
"H3f3a",18713.0976015348,-0.330203811057532,0.211424959789694,-1.56180  
146083976,0.11833476756343,0.224073619961025,-0.493912461422788  
"Tsga10",472.544874797019,-0.00383735312492518,0.116721163291823,-0.03  
28762412633871,0.973773279276913,0.983916225285861,-6.22208484266319e-  
05  
"Gm10087",0.191129265567085,-0.861627539770866,4.78307269716253,-0.180  
141008578442,0.857041868990573,NA,NA  
"Lrrtm1",23.0430154240509,-0.0215061400541706,0.599224283272444,-0.035  
8899675038579,0.971370095487368,0.982506309167023,-0.00037955140770908  
1  
"Olfr464",0.253299407172698,0.646925941974385,4.7847199059629,0.135206  
648390883,0.892448490709088,NA,NA  
"Gmfg",985.00514221324,-0.657793693501893,0.328175819750765,-2.0043941  
5067649,0.0450278554104668,0.107192601934033,-1.46893754447816  
"Gm13363",0.0837058623428615,-0.544048378937457,4.78471990596623,-0.11  
3705376621746,0.90947135024012,NA,NA  
"Intu",529.265474304689,0.381025585506551,0.187725385101131,2.02969665  
131482,0.0423873835081874,0.102450626458738,0.868118897675257  
"B2m",30661.4811079505,-1.33881612709417,0.309794305832636,-4.32162922  
909711,1.54881295852209e-05,0.000237598387610257,-11.1723251988562  
"Gstp1",9945.075457307,0.484614987831781,0.278968947601409,1.737164627  
09749,0.0823581166403489,0.170035849031504,0.85861466017687  
"Serpina6",10.6140070109459,0.833922993688403,0.729642242937695,1.1429  
2038565483,0.253071647747918,0.393429356385656,0.777928194859171  
"Ctnna3",16.7292401058285,-0.404253621310225,0.537899857678586,-0.7515  
40673490531,0.452327332098377,0.592846776894673,-0.211351595203309  
"Ube2s",4568.24254275072,0.39205028382422,0.157240490000126,2.49331634  
507058,0.0126556035850922,0.040485473125862,1.25723157729969  
"Zbtb40",1012.12772946818,0.0968135199802766,0.171928526519199,0.56310  
3296121516,0.573364547156972,0.699503312505734,0.0345996755722529  
"Tcl1b2",0.452935261697987,-1.03107506479238,2.31178946909301,-0.44600  
7336990295,0.655591946080414,NA,NA

"Olfr1420",0.360596360042587,2.46903637430939,4.70427666555752,0.52484  
9312623661,0.599687947900959,NA,NA  
"Kcnd2",43.7904737984548,-0.638674679151114,0.82811322137666,-0.771240  
770784191,0.440564232139234,0.582302155521338,-0.345373422794838  
"Olfr566",0.0721532113593249,-0.544048378937457,4.78471990596623,-0.11  
3705376621746,0.90947135024012,NA,NA  
"Arl1",5602.43958855997,0.108634022270598,0.141571109382685,0.76734598  
4249838,0.442875834881549,0.584224964460668,0.0583874363943117  
"Trim55",1.51637838598584,-1.20496166383281,1.51581245918923,-0.794927  
932230688,0.426655425030356,0.569672497243161,-0.678024276153826  
"Olfr51",0.165238151193594,-0.0669390879395891,4.78471990596623,-0.013  
990178997964,0.98883781629578,NA,NA  
"Acyp2",981.265731085247,0.0229464955292302,0.446219264962566,0.051424  
2600689938,0.958987453605345,0.975039754413986,0.000580019371941011  
"Csmd1",258.837830085493,-0.661374948566116,0.350164861150263,-1.88875  
304733191,0.0589249268787864,0.131711363554119,-1.34070119413723  
"Tmem263",807.621045591162,-0.84732376094288,0.199907175843012,-4.2385  
8602058532,2.24931996607858e-05,0.000314388822212188,-6.83356449619829  
"Rpl26",22568.4802407376,0.10042347743168,0.161962893182597,0.62004003  
17526,0.535231431643285,0.667046497550704,0.0406610165192057  
"Trmt61a",364.901324824256,-0.692230536542113,0.193415946757116,-3.578  
97344116817,0.000344946517331209,0.00258087766497464,-4.12543493582491  
"Slc4a4",14389.8669675773,1.62600180245243,0.410054400030305,3.9653319  
2262359,7.32938835759703e-05,0.000776698269304374,11.6429186075614  
"Dmkn",42.1587861355299,-2.62643450245092,0.810523196381422,-3.2404186  
7546374,0.00119354312282425,0.00673371059283197,-13.1338243719224  
"Irx1",1202.65631548891,2.07243692287823,0.575112859040565,3.603530837  
99166,0.000313923482543873,0.00239471050964023,12.5061059553042  
"H4c8",305.540023174889,-0.38241945948735,0.549923870918644,-0.6954043  
63604949,0.486801926689482,0.623712969285815,-0.180526842738401  
"Tdrd5",447.050960138556,-0.431178870570678,0.516218067023348,-0.83526  
4974465097,0.403568533552248,0.547431422512991,-0.259793065586667  
"Galnt13",1.16755688976571,-1.37248345751788,1.93327105452315,-0.70992  
8105687389,0.477748720459919,NA,NA  
"Gm11847",51.5402063088577,-0.850464494823185,0.464492197570674,-1.830  
95539445263,0.0671072011319563,0.145297003676155,-1.64052502977209  
"Copz1",6154.04419128799,0.115158796843483,0.190110334271401,0.6057471  
69320542,0.5446826563537,0.674788617274026,0.0452983802849495  
"Mkx",46.9693368081281,-1.04382376149479,0.297173673424475,-3.51250415  
107875,0.000443905070038724,0.00314508032544151,-6.01442467437158  
"Rrs1",1430.3928993322,-0.344222308241994,0.172387493423647,-1.9967939  
7504817,0.0458475683507885,0.108711648753943,-0.763848690774146  
"Clasrp",2974.74688182181,-0.0563262593273836,0.149113454754744,-0.377  
740958520657,0.705623037705047,0.804434192198621,-0.0122575017568386  
"Rrp1",7887.86383765596,-0.0843312815215008,0.062886612092438,-1.34100  
532236561,0.179918724568379,0.307346705066957,-0.0994922611640932  
"Olfr920",122.789398953449,0.0922424230689454,0.207135856803344,0.4453  
23298884563,0.656086132824456,0.7656892142228,0.024626782224222  
"Haghl",1813.23041561122,0.424254642348691,0.152355658933685,2.7846333  
0681634,0.00535882880774269,0.0209588159518387,1.63982730924146

"Cdh3",1034.04672677945,-0.35147162744537,0.362017103156954,-0.9708702  
27899116,0.331612905494503,0.476406456773638,-0.26061054895644  
"Gm10093",2.563101665438,-0.607840501975983,1.00442167940529,-0.605164  
657871466,0.545069596123396,0.675028191860914,-0.238881817688487  
"H2a11o",0.113058343341289,2.23400583696369,4.75316341366045,0.4700040  
04184502,0.638352156775581,NA,NA  
"Mcpt4",6.34153438942029,-5.33377636323309,1.77778257821056,-3.0002411  
0293726,0.00269765977263372,0.01249975528679,-23.3728545077463  
"Zfp143",523.857094315426,-0.348261179730981,0.158170741943439,-2.2018  
0531147484,0.0276790637383006,0.0740006012298622,-0.906761386237195  
"Lsamp",40.9152157538433,0.879324006781194,0.698188960432758,1.2594355  
6345572,0.20787305080596,0.340998548259684,0.946044526333222  
"Plac1",0.354178498198676,-1.41268230672579,2.73528208213647,-0.516466  
771727756,0.605528440794599,NA,NA  
"Myl4",63.9359351379545,-0.51505275545293,0.472281366269045,-1.0905633  
6378835,0.275465057643162,0.418890788794757,-0.448170600651393  
"Gapdhs",0.263480644931858,-0.744189238629449,4.78300355965733,-0.1555  
90358515804,0.876355925174319,NA,NA  
"Retnla",985.46630270514,-1.86965113648158,0.794947518558005,-2.351917  
69624369,0.0186769069730274,0.054515319185642,-5.43932656326165  
"Sap18b",4692.52036103008,0.186222093983471,0.203633316851193,0.914497  
179847809,0.360455659064776,0.505696103068427,0.126969832092361  
"Mcrip1",2456.4184355343,-0.296725391902349,0.24673786750927,-1.202593  
64684345,0.229133607396463,0.36566108012901,-0.298520101362266  
"Dnaja30",1307.03214249012,0.726931395515585,0.189093555202056,3.84429  
492977073,0.000120899535618213,0.00115553879680584,4.91637409299667  
"Prcp",2301.93850303579,0.0917952153514231,0.192219358885716,0.4775544  
76737174,0.632967338455634,0.748110649989163,0.026639373939426  
"Cyp4f39",55.1865755236361,-1.39898610124388,0.660801645913324,-2.1171  
0444411844,0.0342509846120055,0.0870656022698391,-3.41505573200439  
"Ppm1b",4476.54924618603,0.170475280341346,0.187608179892441,0.9086772  
2526322,0.363520529368629,0.508532306043157,0.115279907867553  
"Blnk",1398.24966045377,0.033052458211021,0.364095661984779,0.09077959  
9050545,0.927667720706826,0.955553131086781,0.00150272708129821  
"Prpf40a",4198.34974235487,0.799158042900323,0.31904020716603,2.504881  
90814281,0.0122492283646227,0.0395688882427593,2.5810504169044  
"Maml3",725.396640058037,-0.0617276225755412,0.226234985931759,-0.2728  
47377346671,0.784970538892878,0.861018238024753,-0.00923689628226524  
"Spink12",130.026376233231,-0.522082164009302,0.699470274707727,-0.746  
396498732492,0.455427933680173,0.59556900408424,-0.27056282748797  
"Olfr160",0.125919062203067,0.873678315730869,4.78471990596623,0.18259  
758834398,0.855113776752672,NA,NA  
"Rpl15-  
ps3",1585.16920406619,-1.02854968358639,1.91154303618814,-0.5380729934  
4798,0.590526656377189,0.713853072541044,-0.346701592202319  
"Slc38a11",28.3292119306052,-0.5174464473657,0.547709337681049,-0.9447  
4644079745,0.344788341376311,0.489278244552788,-0.369883110348424  
"Fnip2",3053.65268366713,1.1517788501822,0.249587726648541,4.614725514  
14391,3.93615173824134e-06,8.27908161728475e-05,10.8257921882133  
"Sfmbt2",40.703451941638,-0.541781420583564,0.408384312863776,-1.32664

601336997,0.184625807244833,0.312893002143394,-0.62949257813403  
"Stk19",1816.22311046994,0.281780987450105,0.19532614655226,1.44261785  
953328,0.149128149533219,0.26682754141047,0.372275724098618  
"Vmn1r8",0.242952124582424,0,4.78471990595695,0,1,NA,NA  
"H2-  
K1",47055.5182879319,-1.12233693060488,0.264443831225178,-4.2441410919  
0995,2.19432262658676e-05,0.000308248577616633,-9.07364967253712  
"Gm9104",7.49839946814628,-0.124613189151541,0.727265495534989,-0.1713  
44838874657,0.863952625424544,0.914365102889201,-0.01115603702747  
"Exoc5",2766.88920788441,-0.207992641106613,0.135388090030157,-1.53626  
98525423,0.124472210221849,0.232846508193956,-0.303123442894173  
"Tmprss11d",0.709400622437073,-0.0167092613031463,2.44244174234806,-0.  
00684121181415885,0.994541545294263,NA,NA  
"Gm14173",0.554309288616883,0.67531526674301,2.71827714338724,0.248435  
031132073,0.803797832050796,NA,NA  
"Mmgt1",1876.70696954694,-0.108530509343969,0.329483445813133,-0.32939  
5939987595,0.741856436148848,0.831876263309317,-0.0199773813786378  
"Exosc5",1766.22738595792,0.272170915607302,0.204580868623842,1.330383  
02866793,0.183392103375653,0.311560445379322,0.317395355721233  
"Taok3",2279.24074499822,-0.249630832830788,0.268042237515582,-0.93131  
1554270531,0.351692426890806,0.496689768181728,-0.174689074802119  
"Cyp3a59",0.444513541377617,0.807447775634079,2.5994404144247,0.310623  
69083493,0.756086714848784,NA,NA  
"Agbl4",5.85424865766711,0.473290029769289,0.998890755730222,0.4738156  
07016303,0.635631404168154,0.750305189397667,0.135964505009804  
"Slc38a10",6196.84912240355,-0.45908684159834,0.235642849328602,-1.948  
23158396862,0.0513872592404024,0.118770599889683,-0.978112694021239  
"Rag1",0.196292564217243,1.66203818161306,4.75870374221253,0.349262797  
528199,0.726892025203137,NA,NA  
"Ddhd2",2205.79216916079,-1.25464174268101,0.411909086609083,-3.045919  
07163172,0.00231970262821079,0.0111926656384197,-5.63647372419812  
"Naca",14714.351729189,-0.0259216911093672,0.16874917998313,-0.1536107  
67838745,0.877916646207888,0.923773558241121,-0.00205528693039106  
"Dnaic1",18.0122220693763,-0.503573718373689,0.482240373951101,-1.0442  
3798913351,0.296375294874582,0.440787604840931,-0.412523632620767  
"Gm17132",1571.14727973726,0.748201477004942,0.340976844558947,2.19428  
823084083,0.0282146950065856,0.07504162095736,1.93762662270108  
"Cxc12",9027.01045068499,-0.380480735170151,0.270504110259731,-1.4065  
6175170434,0.159557381446512,0.28079841562872,-0.483255525206457  
"Nuggc",17.2836186593694,-1.25814069172149,0.746909091988035,-1.684462  
9489952,0.0920922341295399,0.185363309699367,-2.120517556828  
"Phf5a",1811.3448796,0.140543564872183,0.14033472883644,1.001488127974  
26,0.316590876904684,0.461731536980142,0.108608081902728  
"Zfp873",244.427940874632,-0.089088342896501,0.139414132201043,-0.6390  
19455847063,0.522810275153563,0.656010988155233,-0.0375576622534577  
"Fiz1",1299.31196436451,0.101136888950222,0.144981144226225,0.69758649  
9885873,0.485435826717608,0.622740163783139,0.0479010520520157  
"Csn1s2b",0.10500178835157,-0.544048378937456,4.78471990596623,-0.1137  
05376621746,0.90947135024012,NA,NA  
"Uba52-

ps",3.98041932984832,0.0193968096917879,1.28075317700995,0.01514484604  
83789,0.987916623084061,0.992123643519782,0.000153381025608827  
"Acvr2b",502.721133474049,1.54716080385753,0.404465494029364,3.8251985  
0690949,0.000130666756756268,0.00122487520347775,10.3735837155382  
"Krt79",51.1423214593203,-5.04152905591737,1.03347785070168,-4.8782168  
4082964,1.0704920286463e-06,2.93978219359796e-05,-52.6062885212171  
"Zcchc14",3937.33811465094,0.169046965605823,0.239722426261013,0.70517  
7935341612,0.480699510719603,0.618169044981586,0.0813104617905956  
"Nol4l",898.966002706937,-0.0688625409466303,0.215174963126891,-0.3200  
30453106299,0.748945245352039,0.836582999401546,-0.0122871115897353  
"Cracr2a",273.889244220876,-0.678452950999757,0.24984725298969,-2.7154  
7092426009,0.00661815875006317,0.0246637728036567,-2.51191763921719  
"Hipk2",2527.97006888123,0.780434995726837,0.322995392004699,2.4162418  
8779598,0.0156816399361392,0.0477183846420054,2.37442550356319  
"Tmem151a",206.632215690112,0.629045813523538,0.219210324390798,2.8695  
9939168789,0.00410992141830422,0.0171448968365631,2.55773469300921  
"Stx17",1696.80397888951,-0.234848382082604,0.205250790840768,-1.14420  
208136882,0.252539840143683,0.392821843089073,-0.219442115766865  
"Nol10",681.829825827297,0.244294218050317,0.123459941367677,1.9787326  
5890175,0.0478461138766157,0.112547174371607,0.533632092319644  
"Smim20",1550.87930237065,0.527979726522357,0.244961787597523,2.155355  
46054162,0.0311340288980256,0.0808970276457492,1.32764630860405  
"Obscn",35.3778932183242,-1.36392950597063,0.560408904492122,-2.433811  
26716163,0.0149407831562973,0.0460577691670332,-4.19798245838824  
"Mrps36",1824.99806330225,0.775260689538191,0.290390263685072,2.669719  
98199967,0.00759145270890743,0.0273759258655944,2.78945871887997  
"Rps7",15237.0663315951,-0.211687227015563,0.175389025943558,-1.206958  
22259533,0.227448233441879,0.363805221956501,-0.214044715494429  
"Snrpa",2756.5271196759,0.362692571407674,0.161411387489517,2.24700733  
355155,0.0246395584348049,0.0676527108351782,0.976864512603314  
"H4c4",15.0959547626298,0.529445386087501,0.597820989285473,0.88562528  
8466876,0.375819479823956,0.520916202289578,0.345286327472112  
"Olfr525",4.70336421054712,2.01536117285982,0.800961685186149,2.516176  
75368758,0.011863566947198,0.038675109235323,6.5550812380965  
"Sox21",1.85177548172461,-1.03638485049721,1.28253928957555,-0.8080725  
93893162,0.419048793352183,0.562017703451704,-0.597187677512748  
"Cox5b",14028.9846926341,0.968334439166184,0.304440301696615,3.1807038  
4824136,0.00146917735573568,0.00791763960257997,4.68544319696522  
"Olfr153",0.164672825506994,-0.0737901174966077,4.78471990596192,-0.01  
54220349251088,0.987695484188313,NA,NA  
"Zic2",0.479574067606406,-2.38033390348212,3.12492034118957,-0.7617262  
66140912,0.446223395347222,NA,NA  
"Krt5",2933.62961644587,-3.20827150615554,1.00814017509133,-3.18236648  
575669,0.00146076848512497,0.00787890555054906,-15.5394756659569  
"Tmem236",4.91086255996871,-0.147070002335269,0.761874759482463,-0.193  
036979509825,0.846930007249664,0.902225934620223,-0.0151320779031724  
"Cep128",225.042944405155,-0.709967928972929,0.255725132671208,-2.7762  
9312988079,0.00549826122385286,0.0213385942162984,-2.73141553179918  
"Clqtnf7",605.909189520102,-0.872085745279226,0.37329630260727,-2.3361  
7568453849,0.0194820870363183,0.0562924915581113,-2.509159976356

"Sec22c",451.535542116162,-0.608705525515167,0.23865873469099,-2.55052  
691158908,0.0107560219615863,0.0358988216718608,-2.02519420960902  
"Orm2",13.7016133807433,-3.06049902537455,1.33116728526369,-2.29910925  
490353,0.0214987361054125,0.0608480703416074,-8.56748498487578  
"Zfp229",369.953445182122,-0.478019313397074,0.282057479090284,-1.6947  
5851141697,0.0901212408886353,0.182167111221917,-0.813986019245318  
"Wdr61",1815.42798925496,-0.265825419826214,0.274381084229689,-0.96881  
8315491774,0.332635846606396,0.477453897020871,-0.19652145643682  
"Olfr373",7.61930816488817,-0.544644247992282,0.662565789449113,-0.822  
022894428526,0.411063866951703,0.554589211031297,-0.321082816151322  
"Dpp6",121.518023799898,-4.72107666801831,1.27639751434273,-3.69875106  
694279,0.00021666296627298,0.00180225875272635,-29.8311357778635  
"Adgrg5",194.914985817704,-1.20385613536137,0.484500076998551,-2.48473  
879058842,0.0129646525057325,0.0413047049929367,-3.83642328645111  
"Ksr2",503.543149104704,0.898161009586648,0.429387789001453,2.09172461  
954573,0.0364631568605389,0.0913124367411748,2.14971988879421  
"Lyg2",0.141124190911765,0.395842703016313,4.78471990596623,0.08273059  
04620922,0.934065760570379,NA,NA  
"Dot1l",3108.36261152207,-0.604390921552937,0.236102100497001,-2.55987  
100614809,0.010471102164501,0.0351706373821603,-2.02322502768486  
"Pclo",394.766665645052,0.740391102969286,0.191345624611207,3.86939134  
079327,0.000109107393608323,0.00106149321626027,5.07025651788955  
"Vmn1r78",0.529652498052208,-0.527335893539881,2.67134626005634,-0.197  
40454520065,0.84351097304962,NA,NA  
"Akap6",88.6633476865404,-0.894126380707853,0.271465572168118,-3.29370  
083125724,0.000988776772270844,0.00582276336627512,-4.60115676293679  
"Mdc1",1399.10321813914,-0.574254935792184,0.206906673360859,-2.775429  
74551936,0.00551288085851584,0.021369811327901,-2.20845587207151  
"U2af1",4388.84399307321,0.242190001634807,0.145417866981411,1.6654762  
3522608,0.0958177810252488,0.190969548648707,0.400979767895382  
"Olfr845",1.32126187640727,1.10453469860634,1.36561174263485,0.8088204  
45901575,0.418618433871853,0.561563635193733,0.637349856521853  
"H2ac4",0.716635766677317,-1.72695353030045,2.7464974293111,-0.6287839  
60206954,0.529490502310081,NA,NA  
"Olfr12",8.60558215522987,0.162270747775919,0.638564867110577,0.254117  
876090134,0.799404493452206,0.872022897947082,0.0222212906924305  
"Med9",783.688849781754,-0.204631654504822,0.234468163260082,-0.872748  
14482099,0.382800369482074,0.527591828950412,-0.130848098796267  
"Vmn1r46",430.058881654374,0.417972970413309,0.215111887305369,1.94304  
915292739,0.0520102197199138,0.119855249273003,0.88671733504366  
"Spry3",9.33647012711103,0.820585937114868,0.640151665853058,1.2818617  
5384136,0.199891146581678,0.331361807179863,0.906373624144372  
"Cd2ap",6411.38426402375,-0.185583987349164,0.142423600464413,-1.30304  
23802236,0.192560293289658,0.3225550342407,-0.209984849958681  
"Gdpd1",216.285084348069,-0.964732055407215,0.200108913473445,-4.82103  
489875396,1.428153672269e-06,3.63052676687106e-05,-9.86298419811915  
"Rpl34-  
ps2",0.179941969976219,-1.08159055631944,4.77885724268213,-0.226328283  
393624,0.820946102086218,NA,NA  
"Rpl21-

ps8",4.73432796086428,-0.115953442200215,0.685513483557881,-0.16914830  
2668542,0.865679992232358,0.915547216779481,-0.0102309596455248  
"Dlgap4",4563.7699730809,-0.251800220229064,0.244782135343162,-1.02867  
07397011,0.303634424128851,0.448359090445237,-0.201984272761082  
"Fbxw20",0.595124509373447,3.16588110706234,2.19933552130953,1.4394716  
3876902,0.150016939865529,NA,NA  
"Tmem91",17.3053827977587,0.115718309007855,0.476921517133881,0.242635  
957595871,0.808287423295397,0.877917205844944,0.0150668696425799  
"Ppp1r1b",1414.23824791382,2.61353604250305,0.758149755139876,3.447255  
67051178,0.000566312381531105,0.00380363720809283,14.5620936139423  
"Tnnt3",23.4696296832449,-0.91436556198259,0.459355635887387,-1.990539  
55268495,0.0465315314610467,0.110052377538511,-2.01782088627708  
"Gm2423",0.274441885806103,-0.543880290401727,4.78471990596035,-0.1136  
70246344872,0.909499199587584,NA,NA  
"Btnl7-  
ps",3.25521231730964,0.706650272200526,0.909582232080168,0.77689542218  
1294,0.437220472324373,0.57921760900806,0.385885486188282  
"Ext1",3527.62594894898,0.172235046048684,0.127224831044073,1.35378482  
828575,0.175805035375513,0.302146018488476,0.206138631905465  
"Cyp2d22",2292.43490294679,-0.788488067182262,0.193098777127964,-4.083  
34055196911,4.43928925584713e-05,0.000529402213519923,-5.9481663872566  
6  
"Slc22a12",34191.7471095527,2.18099520712062,1.05520758781927,2.066887  
34263932,0.0387447706930893,0.0956865787173977,5.11809179924017  
"Kalrn",865.624406293212,0.51565871113163,0.253553752878454,2.03372541  
434565,0.0419792882717501,0.101618482247067,1.1790690346421  
"Bod1l",4954.03214425553,0.640355883641564,0.303262007881928,2.1115598  
6242391,0.0347242183012744,0.0878832825075608,1.55718265371197  
"Akr1b10",1850.40633470206,0.210796918625182,0.130888724081745,1.61050  
480172403,0.107287698043463,0.207735405804512,0.331265270002566  
"Armt1",803.138232009516,0.0317932359197183,0.13387741413184,0.2374802  
06246059,0.812284273175057,0.880373471838091,0.00405074635776472  
"Tac1",0.992110543917304,-1.38315316729958,2.43652444859684,-0.5676746  
51529198,0.570255906763276,NA,NA  
"Klra6",4.42069904864441,-3.58241181305512,1.31387970140707,-2.7265904  
2469308,0.00639924160720942,0.0240131664467608,-13.359361749547  
"Mospd2",1338.30585934278,-0.424813612225495,0.122746593709082,-3.4608  
9939760229,0.000538373962659704,0.00366418436523484,-2.38284306715572  
"Cfd",58548.6871563902,-4.43261238994928,1.5965096140789,-2.7764395221  
0502,0.00549578584575236,0.0213332336094922,-17.0544281157431  
"Rps17",19618.6516713021,0.384314760778381,0.145423121429688,2.6427349  
1725452,0.00822393933088782,0.029070045154759,1.35972369069405  
"Olfr1204",1.2678617839095,0.50139460975432,1.88101344319162,0.2665555  
695889,0.789811368472455,NA,NA  
"Armc4",2.514638564475,-0.27540981418479,2.07672487311522,-0.132617381  
218947,0.894495985616748,0.934784603939503,-0.0185734027652824  
"Ttr",2685.31568267546,2.33333807695222,0.777072186108059,3.0027301435  
6449,0.00267569575908188,0.0124245572542459,10.2388749446035  
"Tbpl2",1.9210423877192,-1.68435872162092,1.5102709769085,-1.115269211  
53499,0.264735074896487,0.406550425585528,-1.51600253563911



"Rufy4",214.132845820021,1.30975606314734,0.419122578464235,3.12499524  
112157,0.00177807936354788,0.00914025611137795,6.14939230375487  
"Myl1",179.807080011795,-3.51658272382083,1.48518954565477,-2.36776695  
211013,0.0178958044607524,0.0527486614324642,-10.3465490592111  
"Ces2c",7209.62595939103,2.17162532264476,0.821202582850872,2.64444531  
470637,0.0081824927215431,0.0289664321535938,7.69106653141925  
"Vmn1r214",55.2186411191612,-0.153023707640684,0.311698194490762,-0.49  
0935495762774,0.623472070684749,0.741066717520802,-0.0458557912928079  
"Gm6311",16.8408860404363,0.205878975843656,0.529292275248546,0.388970  
301421798,0.697298115840891,0.797976209805476,0.0464620455082927  
"Suc1g2",11252.0897985931,1.25300989493838,0.303770579812991,4.1248559  
8740261,3.70966802623842e-05,0.000460121546918555,9.62815293120691  
"Gm5805",0.232036852635898,-0.529073992971307,4.78471990596623,-0.1105  
75750173294,0.911952778097123,NA,NA  
"Gm7582",1.43322461467646,-3.42098301743061,1.65156105681143,-2.071363  
33429615,0.0383248546647445,0.0948904827858688,-8.05652401622614  
"Patj",2749.67334559568,0.758600359066112,0.220135679792679,3.44605817  
548774,0.000568827888846202,0.00381134232877088,4.22523243086734  
"Sphk1",1554.73089588099,-0.131841529399183,0.363865371794272,-0.36233  
6016612554,0.717100946725752,0.812537997085031,-0.0273693259060928  
"Ccdc62",800.096350099832,0.663525836543598,0.235961971339598,2.812003  
27653072,0.00492340017941422,0.0196351926157125,2.60794303558868  
"Ssbp3",4126.26055461276,0.192756598202745,0.161684002453816,1.1921810  
1529744,0.23319027576302,0.370557782952516,0.191358320061817  
"Zscan20",277.470152370085,-0.203373602355884,0.211521185203365,-0.961  
481007967845,0.336310370281088,0.480746304966324,-0.148953995031984  
"Gm14292",0.37917734050929,1.17782605233903,3.73497370312312,0.3153505  
60930096,0.752495499770766,NA,NA  
"Rbak",813.245137833787,0.0303744039282722,0.167136146052737,0.1817344  
99960816,0.855791089741383,0.908332100605316,0.00292035367775364  
"Slc25a3",30846.7291100519,0.83144941393156,0.211745755358192,3.926640  
28860964,8.61406584745737e-05,0.000880739674324718,5.84903748799918  
"Ugt2b38",24826.7561710841,2.15451509870194,1.00659276863383,2.1404039  
1093421,0.0323221387428658,0.0832409273819043,5.35615930161526  
"Myt1l",1.01634873446294,-2.67771090182099,1.89036638537179,-1.4165036  
5904827,0.156628093612812,NA,NA  
"Odf1",0.325928041952647,0.0186684436687211,4.7406639483565,0.00393793  
862465048,0.996857987690724,NA,NA  
"Dsg1b",1.11795811248785,-3.02031376995828,1.6467432695431,-1.83411332  
283525,0.0666371741714212,NA,NA  
"Serpina10",1000.48303403427,-0.733162876329584,0.686508724101008,-1.0  
6795857152387,0.285539199901255,0.429686140285148,-0.619302859881751  
"Ppp4r1",1716.29581859937,-0.408473789907047,0.171919729905944,-2.3759  
5644275686,0.0175035288816291,0.0519041214724126,-1.20841132843268  
"Ces1e",1998.87130437109,2.29041991028922,0.797390768904166,2.87239331  
029237,0.00407375607161955,0.017026815838036,9.32880190608747  
"Gm5581",0.809788489855658,-2.6856174090615,2.79797373291567,-0.959843  
681685642,0.337133894075159,NA,NA  
"Olfr99",0.0886915477092956,-0.544048378937457,4.78471990596623,-0.113  
705376621746,0.90947135024012,NA,NA

"Rcc1l",1398.41931129359,0.19121727114143,0.151738961189294,1.26017253  
342658,0.207607128897979,0.340727647683933,0.205878245033598  
"Flot2",2589.45655994416,-0.251793588841928,0.114007471029984,-2.20857  
095212388,0.0272044976429567,0.0731027143112417,-0.658664276082453  
"Rps12",22892.5718996255,-0.348838375650012,0.165222691662198,-2.11132  
243483371,0.0347446069739785,0.0879134288998521,-0.848166572332159  
"Olfr392",1.00115280638374,2.69913593013162,1.44535060188868,1.8674610  
3444007,0.061837233373904,NA,NA  
"Rpl10a-  
ps2",0.649839906439055,-1.35121119535842,2.3819702674584,-0.5672661887  
59016,0.570533344927312,NA,NA  
"H2ac10",5.05047622703787,-0.19561360357287,0.985500800217359,-0.19849  
1572538273,0.842660477720876,0.899249849192799,-0.0207730622426331  
"Rpl34",13060.9860014257,-0.0674392245138679,0.201936641101954,-0.3339  
6229701483,0.738408009466573,0.829252353909644,-0.0126266974320711  
"Hsh2d",46.1322863091561,-1.28628241864889,0.484315411640972,-2.655877  
52884152,0.00791023364020118,0.0282456057465852,-4.58793448936071  
"Zfp13",312.06018197659,-0.157190243453575,0.195035859803319,-0.805955  
600227011,0.420268450394119,0.563266032841939,-0.0902277082839065  
"Gmfb",4941.07235962254,0.0362058765045749,0.185964527527132,0.1946923  
80240594,0.845633777454457,0.90127792211635,0.00376329707069397  
"Abca14",19.5145200195959,0.404693169499228,0.762722240548311,0.530590  
492822524,0.595702585269017,0.718394916351763,0.133846534695707  
"Irgc1",1.25304504440273,0.398318364024855,2.28893291349086,0.17401923  
9129809,0.861850342278684,NA,NA  
"Pgghg",2116.46963507702,0.193800629725373,0.0993554290758214,1.950579  
16339406,0.0511071278682333,0.118361655680581,0.413572571576413  
"4932415M13Rik",0.239350183799582,-1.20753252151604,4.7758208091703,-0  
.252842928946872,0.800389592731462,NA,NA  
"Olfr285",0.221588377067587,-0.670548778065938,4.78224455989599,-0.140  
216329313054,0.888489070434352,NA,NA  
"Gm10108",2.49967644347741,0.682830700191409,2.70071009095096,0.252833  
764897355,0.800396674567494,0.872582295818674,0.0930686687440141  
"Zfp27",365.839271813728,-0.0213331969172153,0.164068018103385,-0.1300  
2654121032,0.896545428095399,0.936256373895564,-0.00140513098868594  
"Lmtk3",916.923403208867,0.196183988626425,0.436070914749781,0.4498901  
02711839,0.652789684406085,0.763578694975694,0.0529184902282023  
"Iah1",5577.37511388422,1.21160180044627,0.338482270591595,3.579513332  
64413,0.000344234686271652,0.00257752992047799,7.22226592820428  
"Obp2a",0.625519372919127,2.62254887943938,2.03329016417199,1.28980552  
094854,0.197118190570584,NA,NA  
"Slc2a7",1.21294289000538,3.65472937313698,2.02957206978317,1.80073889  
838631,0.0717440435010055,NA,NA  
"Pgk1",15873.3749935343,0.387423686620205,0.421853980480057,0.91838338  
5121384,0.358418186044752,0.503526031522485,0.265819088345403  
"Gm10109",28.166660089704,1.73697407163981,0.62991477645213,2.75747471  
971204,0.00582497172409374,0.0223015735526939,6.60588268756557  
"Ccn6",1.23970852094233,0.374823184347406,1.62997361196273,0.229956596  
595489,0.818125496811028,NA,NA  
"Lmn2",1037.85693707702,-0.0770123186818815,0.147628694267906,-0.5216

62262636592,0.601905504038028,0.723548305655578,-0.0249202597525985  
"Qk",5513.77057966008,-0.906526223214764,0.234153874136388,-3.87149786  
249847,0.000108168606070526,0.00105453574058155,-6.2139242051107  
"Gm6055",0.592844562268841,1.81205212193621,1.91824609674737,0.9446400  
67303553,0.344842664088049,NA,NA  
"Cd200r4",61.9008275966359,-1.46562442763017,0.384857457255351,-3.8082  
2665638965,0.000139966952105531,0.00129278807776108,-9.74780078467601  
"Gm10110",23.5160641586611,-0.348555859289718,0.389166088634682,-0.895  
648077951918,0.370440749323958,0.515623481604693,-0.230875895623141  
"Btbd3",1091.00847429303,-0.375242249502665,0.147588176389766,-2.54249  
533181905,0.0110064071444202,0.0365467569387485,-1.24173770286227  
"Zfp119b",255.112618652355,0.0181780107699796,0.139488962676932,0.1303  
18631819504,0.896314339711349,0.936165470092772,0.00119907673959851  
"Olfr924",0.108274485117243,0,4.78471990596524,0,1,NA,NA  
"Olfr183",0.241462246513091,1.39742151856692,4.78471990596165,0.292059  
210576939,0.770241352900528,NA,NA  
"Scfd2",486.932369956738,0.405030486767439,0.181360889819752,2.2332846  
2476107,0.0255301807839391,0.069591425265657,1.07945238808049  
"Rai1",1792.71550373701,-0.157862217083443,0.148328665657174,-1.064273  
15572502,0.287204975037027,0.431227676210685,-0.132780922371389  
"Zfp954",597.715427779073,0.136731281057804,0.160173136103435,0.853646  
774884316,0.393300733257665,0.537881580771407,0.084789371735155  
"Olfr149",46.942766580422,1.25510432812896,0.490642308955458,2.5580841  
7908554,0.0105250610815102,0.0353092981705584,4.1965780590208  
"Defb45",0.28074839821248,-1.23911251551238,4.77469833260232,-0.259516  
398565233,0.795236831096309,NA,NA  
"Cttnbp2nl",1481.99670060715,-0.876907119416866,0.225055761556504,-3.8  
9639933388999,9.76333606990605e-05,0.000971252687199124,-6.08303794559  
342  
"Olfr20",0.65641214935167,-0.337937167906532,2.97475862565087,-0.11360  
1542320965,0.909553664672825,NA,NA  
"Arhgap33os",16.815130223306,2.24918433855387,0.546619836614337,4.1147  
1408078585,3.87659629839036e-05,0.000475260260970854,17.2099668145723  
"Olfr569",0.515317738845582,-0.309193945973597,2.38315759772722,-0.129  
741292085958,0.896771112288672,NA,NA  
"Ear6",0.914853984766892,0,2.69815658588167,0,1,NA,NA  
"Unc13c",102.532593835425,-0.16903568281525,0.444844495446205,-0.37998  
8253301184,0.703954134836806,0.80354184981655,-0.0369725005781852  
"Rpl21-  
ps14",0.527958214878733,1.26601644418254,1.89644159921792,0.6675747066  
00316,0.504405107644327,NA,NA  
"Tex33",0.404112274515658,-2.20455175016459,4.74361693850967,-0.464740  
677576129,0.642117174446099,NA,NA  
"Ifnlr1",519.460593118577,-0.156153840060075,0.237246414634602,-0.6581  
92623482118,0.510414364164877,0.644683380145349,-0.0685509058937459  
"Ppef1",1.13294872975235,-0.519403731284912,1.73649547657258,-0.299110  
327836896,0.764855866348567,NA,NA  
"Cnih4",1975.16410377357,0.197227372919287,0.176910815349304,1.1148406  
7568096,0.264918702404634,0.406755245254394,0.177414628438969  
"Fmr1nb",11.2693813046385,1.51677058110525,0.619956265578206,2.4465767

4310401,0.0144220090656623,0.0449920532419654,4.70391418913658  
"Tgif2",346.688296772451,-1.22844742009343,0.348282205844552,-3.527161  
01907808,0.000420041233786881,0.00301101616778552,-7.13172405374314  
"Ces3b",3.88861586922367,2.73280877492408,0.799789359407867,3.41691064  
375669,0.000633360643334524,0.00413710747863871,14.9969943429511  
"Hs6st2",344.678066476299,0.545254118517996,0.328344998546374,1.660613  
44296976,0.0967911073528546,0.192476594713509,0.898459223204101  
"Olfr395",0.695012146517874,0.397847078584977,2.64536860699381,0.15039  
3815641855,0.88045392018258,NA,NA  
"Lancl2",457.608128783112,-0.354842062655055,0.198754532153096,-1.7853  
2815735608,0.0742081042126452,0.157019294119552,-0.656949835907375  
"2700097009Rik",807.940844179388,0.229012829688201,0.159448727089182,1  
.43627882058984,0.15092301819641,0.269280472986238,0.300465242954814  
"Vmn2r7",47.1838451029708,0.959180260761452,0.454310678924752,2.111287  
06688473,0.0347476450085569,0.0879134288998521,2.33215348656173  
"Btbd9",1896.38903106556,0.395705883214534,0.259446842575687,1.5251905  
9120597,0.127211566679893,0.236338363708866,0.57080207873378  
"Gspt1",3202.02548623422,0.0584862479451692,0.172810036084484,0.338442  
426553144,0.735029806665763,0.826648853340777,0.0111343356591875  
"Erbb4",816.472704170879,1.11970483332463,0.430921029117049,2.59839914  
431395,0.00936595540653525,0.0321679405525144,3.84818472792125  
"Tnfaip8",9298.79657719741,2.09547145985458,0.348539915596381,6.012141  
9845674,1.83087852331712e-09,2.45452644100394e-07,31.8934146747347  
"Rapgef2",1167.98236783893,-0.268104791992373,0.135226343378525,-1.982  
63729754117,0.0474079580862593,0.111732185031534,-0.587591995057459  
"Gak",3627.87633269909,-0.0724221978314863,0.135282396610682,-0.535340  
884297788,0.592414160054167,0.715358350946687,-0.0242593846762885  
"Cks2",817.505465520563,1.15522577233929,0.28396327815521,4.0682224118  
7066,4.73731527426679e-05,0.000555765181815005,8.6586074152592  
"Lhfp15",0.260204320897396,0.397924915928457,3.98377616003863,0.099886  
3640783971,0.92043454209547,NA,NA  
"Opcml",25.5870485444691,-1.35922649698108,0.724090956834292,-1.877148  
83627822,0.060497697606781,0.134379872934622,-2.72808259318863  
"Morf4l1",11885.7467564271,-0.382664476938162,0.17715574028349,-2.1600  
4559787795,0.0307691398406742,0.0802054396542066,-0.965525209443157  
"Olfr1129",1.56510671620164,0.306620970840995,1.20985745771196,0.25343  
5616639389,0.799931607704478,0.872172817034161,0.0419358418988074  
"Fbxw24",0.478618549867702,-0.697244032434106,3.15051274909627,-0.2213  
11287387779,0.824850061811958,NA,NA  
"Gm6030",30.4954794357771,0.957835541278288,0.377655075888528,2.536270  
79955099,0.0112040057733842,0.037033287709258,3.15696665688629  
"Trank1",184.253997947229,-1.45817206011252,0.523968052480001,-2.78294  
077894792,0.0053868637809363,0.0210378214283448,-5.63063435529148  
"Nectin2",2921.50797171332,-0.386387530892561,0.161350955903249,-2.394  
70245918003,0.0166338573672704,0.0499534670756096,-1.15787335866278  
"Rpp25",23.6621309204059,-0.211832175109866,0.418125713366499,-0.50662  
317178324,0.612419246589879,0.731810410615277,-0.0661411650941147  
"Glrp1",8.14005731951284,-2.00407733618337,0.665938201752746,-3.009404  
37252083,0.00261760466605891,0.0122481535346332,-8.82271015405294  
"Erbb2",3654.84017047031,0.424652214445813,0.179374994005589,2.3673991

8403889,0.0179135997963786,0.052785154727186,1.24912522751344  
"Olfr1505",5.91869412885523,0.775332758862994,1.06639880247774,0.72705  
7041944846,0.46719101302082,0.605720040137108,0.38870329366984  
"T",6.51195133188397,0.309403886789224,0.900501135142852,0.34359077930  
5504,0.731154060050101,0.823858175153541,0.0599491322031039  
"Rpl17",23771.0851601074,-0.0486395449453628,0.154517921425081,-0.3147  
82547530876,0.752926763661001,0.839500614244724,-0.00850939455207907  
"Cyt11",87.6109667925487,-0.761056555355398,0.405961099097838,-1.87470  
316009757,0.0608335719192709,0.135048728826363,-1.52372625486361  
"Serp1b2",1.0631529006035,-0.265644371726313,2.09330099630306,-0.1269  
0213791302,0.899017854513979,NA,NA  
"Itgb1bp1",1171.52176836475,-0.287832709996185,0.245403598154812,-1.17  
289523120442,0.240837822158728,0.379217948514163,-0.279095311238767  
"Gm15772",6.48782129996769,0.226553078662839,0.694368215399409,0.32627  
2248122018,0.744218383152391,0.833569050706877,0.0412414360638438  
"Gm4968",0.649627802513974,3.80987218317857,2.31741686735195,1.6440167  
6575868,0.100172739271644,NA,NA  
"Otof",10.2446427781421,-1.70973909630893,0.757228212836824,-2.2578914  
3526981,0.0239524287220031,0.0661039568608092,-4.64455185759083  
"Tmem65",2126.12538995886,0.0034205480383083,0.139926094257911,0.02444  
53906646145,0.980497342615573,0.987395102506559,4.33896968768693e-05  
"Borcs7",841.196253959913,0.186021502380725,0.180678225221088,1.029573  
44280474,0.303210287254296,0.447810496961389,0.149446909600283  
"Tubb3",45.9968260049225,-1.17312397601275,0.670804686729676,-1.748830  
91788162,0.0803202507233597,0.166782135101605,-2.10114352127421  
"Ftl1-  
ps1",207.323783505341,0.920441790470175,0.235005673203275,3.9166790227  
8262,8.97771534661132e-05,0.000908102313299156,6.44691559366725  
"Dgk",4.05550096343062,-0.898954904581844,0.906662205303493,-0.991499  
258845725,0.321441854077785,0.466746594489772,-0.68497558343121  
"Zfp706",9093.26911288975,1.23340403426456,0.189013556510179,6.5254792  
1449295,6.77844582306156e-11,1.76221515544072e-08,22.0213302109408  
"Hsd3b3",1817.43140389233,2.42979263276394,0.952762593447005,2.5502603  
1613309,0.0107642511486626,0.0359198720232817,8.08261917429553  
"Arf2",1636.42474137757,-0.581436149569898,0.196792090497534,-2.954570  
72537773,0.00313104377934046,0.0139604600067643,-2.4836197642004  
"Cyp26c1",1.92989777731726,1.59500201781409,1.34830955422541,1.1829642  
6278045,0.236823311053838,0.37492537503473,1.56474207452462  
"Adam1b",0.540863715602231,3.09315509102605,3.57642536636073,0.8648733  
7891062,0.387108290401802,NA,NA  
"Ap3b2",16.045619694518,-1.44098914056349,1.02715213274057,-1.40289748  
191317,0.160647411884645,0.282245849983283,-1.82281780217594  
"Rpl9-  
ps6",6.89603995977588,1.08466860192497,0.70280683607851,1.543338149607  
58,0.122748751935742,0.230396146057286,1.59224478158129  
"Gm8623",1.55608440213497,-3.39241154076641,1.90959996878845,-1.776503  
76844044,0.0756499213452646,0.15925525441481,-6.23269789319552  
"Gm5453",0.754329204327236,2.69394711665319,2.13267789241708,1.2631758  
0645054,0.206526005465044,NA,NA  
"Cyp4f37",5.460758681788,0.468024879948122,0.761369851081642,0.6147142

27629609,0.538743462160168,0.669812533151446,0.187564437306657  
"Ctrc",0.772739947468103,-2.52395789833569,2.25116498461172,-1.1211785  
522557,0.262211867272644,NA,NA  
"Acat3",1064.5107157723,0.11715490696682,0.377190418008026,0.310598841  
787987,0.756105607789919,0.841774546120265,0.0201791197339569  
"Vmn1r171",0.464385879208259,-0.463233589677768,2.30152029837639,-0.20  
1272867332327,0.840485217151182,NA,NA  
"Ifit3b",648.35211817503,-0.239082661223746,0.307223759564717,-0.77820  
3683082601,0.43644894588314,0.578543018940467,-0.130836162681961  
"Nsl1",144.974561462009,-0.89137296511084,0.338489254503233,-2.6333862  
988325,0.00845381355588425,0.0296995417500236,-3.13462326129702  
"4930512M02Rik",8.13108573224448,1.53216539139822,0.586842130745845,2.  
61086467914449,0.00903136226188221,0.0312555025527475,5.30981084347713  
"Fabp4",80548.9905540465,-3.28978676502829,1.10590798003608,-2.9747382  
4623363,0.00293238647622539,0.0132904861723483,-14.2142041288112  
"Zfp534",3.81036726067099,-2.09006539423271,1.0309261744041,-2.0273666  
9814481,0.0426249250264412,0.102897212847041,-4.75286037821792  
"Zfp398",993.886088721653,0.0561611899918066,0.220146571521937,0.25510  
8174538209,0.798639550641938,0.871397535445803,0.00773098056972451  
"Ncr1",22.8435095835197,-1.55601324119214,0.536730294571663,-2.8990598  
3867357,0.00374283455278632,0.0159822507607153,-6.43610100316464  
"Mppe1",1597.89486784347,0.126359801644533,0.103889497603871,1.2162904  
2934004,0.223874306051814,0.359919295794712,0.129123979295259  
"Syt9",93.1880855888679,-0.0373710035285967,0.565924747355048,-0.06603  
52877361466,0.947349731205053,0.967444878177139,-0.00123686171938243  
"Tlr12",978.881741573865,0.561430240944112,0.420976693034989,1.3336373  
4912861,0.182322736355608,0.310348504953185,0.656906732784866  
"V1ra8",3.68224354886748,-0.282285676847531,0.976458506705061,-0.28909  
1318175996,0.772511497184718,0.852772764348787,-0.0449574274277812  
"Olfr709-  
ps1",24.5954501614668,0.508426022511074,0.375360426545888,1.3545008651  
8089,0.175576637554926,0.301864833713601,0.608980453109426  
"Gm12751",0.54064158932069,-2.84747476521307,4.73253776498958,-0.60168  
0304862678,0.547386962496538,NA,NA  
"Cys1",3634.50509259719,1.2828669077254,0.436638538893139,2.9380524013  
6938,0.00330281193616959,0.014540128049545,5.42760847674698  
"Timm17a",4106.47660781255,0.365008123596857,0.431382329780056,0.84613  
6010677487,0.397476873880501,0.542034136726956,0.223540573376028  
"Rpl30-  
ps8",0.138548965846646,-0.0654867501610588,4.78471990596623,-0.0136866  
423632031,0.989079980300855,NA,NA  
"Cnr2",131.25871961128,-1.05721258761521,0.378712051486265,-2.79160006  
518451,0.00524481377220426,0.0206384215803105,-4.10262002924966  
"Gm6104",0.439973685788003,-0.205577025406346,3.13883693550012,-0.0654  
946496523214,0.947780166150439,NA,NA  
"Armc9",621.463185238126,0.535137386301387,0.186605739890601,2.8677434  
3926995,0.00413410623715406,0.0171986715608152,2.17422206612733  
"Tubb4a",129.38033734294,-1.60230666542894,0.314617609146793,-5.092870  
26169392,3.52683047771857e-07,1.21709983459392e-05,-18.1324306682103  
"Gm49339",292.548941369051,-1.73646151390773,0.76417667062003,-2.27232

992142879,0.0230665908856472,0.0642687037851314,-4.7660355084383  
"SrpK2",2721.08737299989,0.0438555317461338,0.1657142834969,0.26464545  
3733349,0.791282601123787,0.865657399170961,0.00632686484709501  
"Olfr195",3.92619916185879,1.64442277801792,1.00801346694122,1.6313500  
0865401,0.102816486893851,0.201519487480529,2.63415018378568  
"Kcnj15",17406.2143255605,2.03765594471986,0.587010541565673,3.4712425  
0832878,0.000518055910472574,0.00355796200859255,11.489460316167  
"Rps3a2",4.05049832100066,-0.325917377277439,0.859477290586887,-0.3792  
04175429567,0.704536251176368,0.803759675923176,-0.0711982692555334  
"2310039H08Rik",1315.75243766699,0.942226427262736,0.342554655839484,2  
.7505871288004,0.00594885690171944,0.0226810347809397,3.56748236252832  
"Cyp2c67",1.47770528603262,0.517365890215459,1.03966647120459,0.497626  
791422853,0.618747116617537,0.736978086732361,0.157898579834231  
"Mysm1",1655.87380133572,0.00419796731740476,0.144196342885121,0.02911  
28556620138,0.976774582808834,0.985263880786686,6.23220757866145e-05  
"Btnl1",0.289881588914466,-1.59284648620729,3.21307623260759,-0.495738  
778321675,0.62007872383648,NA,NA  
"Ganc",1812.28710957508,0.196884400905267,0.304782898983043,0.64598244  
0491917,0.518290727384894,0.651604965984408,0.0843288928380866  
"Rpl7a",27483.8735962467,0.132970514047064,0.152391646552429,0.8725577  
61893576,0.382904171406456,0.52766029642258,0.0850083927367442  
"H2a12a",0.618701412413944,3.43387230844046,2.43746646494908,1.4087875  
0859541,0.158898009866266,NA,NA  
"Ncs1",758.08189777126,0.138614854360855,0.334628558765774,0.414234980  
039105,0.678702026302531,0.783570906194209,0.0338072927532046  
"Atp5g2",994.149507763041,0.279574691956751,0.360789592410776,0.774896  
775953676,0.438400657397742,0.580519014145245,0.152041866178833  
"Cks1brt",1.00312849301588,-0.0859844376034579,2.00918177474239,-0.042  
7957483411289,0.965864353218585,NA,NA  
"Cebpzs",1243.9035284813,0.780042967062893,0.191088227604218,4.082108  
9652813,4.46288621143969e-05,0.000531566007029024,5.8812768367334  
"Cav3",67.2429866006591,-1.57421019483762,0.664559007273931,-2.3688042  
4101863,0.0178456961794322,0.0526407540251994,-4.63489145647807  
"Sim2",781.079780222075,0.772562304855777,0.595164703917056,1.29806472  
018785,0.194265096186415,0.324655331109621,0.869125778240092  
"H2bc12",8.97150662617021,2.02239813185569,0.846489979456375,2.3891577  
9387548,0.0168870476643156,0.0504770187861264,6.03936037240263  
"Ppox",3272.81298569557,0.189359899934356,0.131367684836927,1.44144962  
415542,0.149457699411336,0.267272238655491,0.249858024677826  
"Lypd4",0.199120071014121,0.836715401339777,4.78471990596334,0.1748723  
89143814,0.861179906212783,NA,NA  
"Gm5239",0.0834092404687712,0.889131662027683,4.78471990596623,0.18582  
7316854847,0.852580181873773,NA,NA  
"Zfp677",293.395444904928,-0.524608819115631,0.16282893002102,-3.22184  
036367437,0.00127370079241191,0.00707181383926476,-2.59767310951347  
"AI413582",730.188747061243,-0.108371782646747,0.167857626831443,-0.64  
5617269184741,0.51852725063118,0.651811252195652,-0.0463831500076027  
"Gm16477",2.27309504685139,-1.87803926116539,1.439617476614,-1.3045404  
7111359,0.192049369975685,0.32200349262928,-2.12818073192463  
"Shisal1",89.385217501848,-1.86217182678811,0.541546046644195,-3.43862

140316129,0.000584684305319687,0.00388819051334354,-10.3347024204771  
"Zfp512",2283.82233336701,-0.166822682242932,0.177109407496872,-0.9419  
18809399657,0.346234209312568,0.490936994631405,-0.118684242295055  
"Ei24",5532.40481061372,0.118309631849654,0.194156246847777,0.60935269  
2846453,0.54229068746738,0.672748223213017,0.0468960605456759  
"Chia1",31.038858325365,0.717762943071251,0.580885810013055,1.23563518  
112987,0.21659420132778,0.351884859168541,0.749668411369721  
"Olfr527",0.091991025955798,0,4.78471990596463,0,1,NA,NA  
"Csprs",111.542122380712,-0.957305337593566,0.46750728121475,-2.047680  
05988302,0.040591358924067,0.0990179302266306,-2.21372487481782  
"Kcnc3",1153.01259223204,2.12868002401104,0.543557598990766,3.91619954  
89777,8.9955799250392e-05,0.000908821270936982,14.907917013299  
"Zfp599",74.686390875742,-0.00794852194416819,0.402158483574202,-0.019  
7646506758364,0.9842311170459,0.989764212706224,-8.17786319441094e-05  
"Hikeshi",1335.17036905523,0.257490796224743,0.202990170072364,1.26848  
899201843,0.20462337934868,0.337133488906033,0.27996364472148  
"4833420G17Rik",2750.22380796253,0.241046020015247,0.137625146161612,1  
.75146785844055,0.0798653530729202,0.166120615982057,0.432687525494571  
"Actg1",49639.3061433496,-0.458523657190497,0.301970574990912,-1.51843  
820280932,0.12890396711452,0.238709236470596,-0.65683928924975  
"Ces2f",62.946680722229,-0.986772148811324,0.509821708975408,-1.935523  
99091527,0.0529260275743163,0.121426137544981,-2.08055887126984  
"Gm14176",0.242903727181791,-0.0613195736244216,4.78471990595968,-0.01  
28157080936011,0.989774824278315,NA,NA  
"Tcp11",67.404711605779,0.740624751931807,0.577965520344668,1.28143414  
418586,0.200041217606254,0.331497846412268,0.817748944572865  
"Zfp28",385.128200269747,-0.294185927485982,0.252058659773203,-1.16713  
279262329,0.243156746688984,0.381974721796794,-0.283124785456129  
"Phactr2",2754.27878655877,-0.274679232542978,0.116214298988265,-2.363  
55796949492,0.0181003946372777,0.0532274266590738,-0.805684036949716  
"Impdh2",2033.94096690668,-0.13930395633612,0.130771541114898,-1.06524  
672836672,0.286764292728648,0.430806663198691,-0.117307285857373  
"Olfr1450",0.0932104200047838,-0.0709659466494103,4.78471990596623,-0.  
0148317870312368,0.988166379983966,NA,NA  
"Rpl31-  
ps11",0.825932833791809,-0.829589181289824,1.9692754890604,-0.42126618  
9468313,0.6735607163544,NA,NA  
"Klhl24",4960.8060945862,-0.0180582000844321,0.144757960677059,-0.1247  
47544107216,0.900723416604533,0.939261160389089,-0.00113155773949855  
"Vmn1r32",0.248176354473243,-1.71628860260777,4.75769758019014,-0.3607  
3932268288,0.718294326000372,NA,NA  
"Hdac10",1350.57665779758,-0.0322841179963259,0.147544923318284,-0.218  
808734792472,0.826799042367602,0.889430495342538,-0.00378285646399916  
"Acadm",26585.5806529139,0.700191949464149,0.488644837328039,1.4329261  
1724473,0.151878952594156,0.270713576897417,0.914936569391116  
"Cfl2",3830.34399420149,0.0728785607356954,0.271770127050057,0.2681625  
14867839,0.788574227372437,0.86360482393326,0.0106869117465405  
"Zfp938",545.029188817006,0.442779700108307,0.129982999579934,3.406443  
16209996,0.000658152526805984,0.00426475838074546,2.41641254185438  
"Gm10123",4836.08458143453,-0.285486326200761,0.511310922414768,-0.558



341927945711,0.576610919383044,0.702029181605911,-0.100999440008021  
"Mtap",1314.13409572998,-0.0612304238618411,0.159129241397902,-0.38478  
4237792817,0.700397278112391,0.800536146821935,-0.0136221523521146  
"Stat4",205.257278435066,-0.904943990313324,0.624717335570071,-1.44856  
551721514,0.147458956887345,0.264503656061588,-1.2034851984486  
"9130023H24Rik",356.757348234944,0.0226021795722143,0.147703483637366,  
0.153024011455992,0.878379339887111,0.924115921281978,0.00178371336660  
455  
"Atp11c",1280.92843231645,-0.119272671797552,0.0982995848333073,-1.213  
35885598917,0.224992649605073,0.361002854015776,-0.121523277318346  
"Kdr",3454.46992798562,-1.13511770171915,0.382450536016006,-2.96801179  
452822,0.00299732829017788,0.0135376203386352,-4.88359733844406  
"Ccdc177",2.71995327200177,-0.363173028949493,0.978888996902782,-0.371  
005323482619,0.710633566674467,0.807944418794408,-0.0774510106573844  
"Ufc1",3952.84188672701,0.439999432076025,0.234092074876605,1.87959986  
389099,0.0601626318404125,0.133848812827974,0.884858384409254  
"Cped1",1673.83541947224,-1.69362047881128,0.232112476288897,-7.296550  
818334,2.95238367855876e-13,2.74121795069232e-10,-37.2892018414096  
"Mrpl42",3377.77958538617,0.585962853663823,0.304064806096695,1.927098  
57212966,0.0539673466708091,0.123200483009886,1.22697240982551  
"Olfr715b",275.10273370461,1.00562125579569,0.309315188913078,3.251121  
48333034,0.00114950728246861,0.00654396875724758,5.05748193798561  
"Nrg1",540.425683909404,0.129198270550261,0.496472289315676,0.26023259  
1688741,0.794684365530579,0.868394090630232,0.0182311222075865  
"Ica1",547.644925728212,-0.223425910218315,0.158041303174095,-1.413718  
4756835,0.157444578412027,0.278167306078082,-0.285880719250474  
"Rpl35",14329.6737232494,0.175285700476498,0.190856555553355,0.9184159  
27439788,0.358401155286297,0.503526031522485,0.120267001501962  
"Gm9701",0.166582518091936,0.829727093973876,4.78471990596623,0.173411  
842339875,0.862327717283469,NA,NA  
"Msln",244.805932229451,-1.3192229221096,0.610607545316416,-2.16050871  
337658,0.0307333098071978,0.0801227536596794,-3.3299764310134  
"Ccn1",13116.5984790562,-0.00287537774379533,0.187176495161645,-0.0153  
618526798045,0.987743496984929,0.992084222819578,-2.28514126711151e-05  
"Manbal",1089.00804733601,-0.18216704734944,0.177936480362452,-1.02377  
571467285,0.305941223553599,0.450410901302331,-0.145295525920744  
"H2ac15",0.574946448587534,-1.21688045328461,2.31919590919613,-0.52469  
9292741682,0.599792249056832,NA,NA  
"Zfp780b",595.854215322422,0.270261749131525,0.0808903915017986,3.3410  
8593262916,0.000834513899000379,0.0051248352764439,1.42526773693948  
"Ing2",912.781397140231,0.0906893377904817,0.203318279778832,0.4460461  
59199914,0.655563903300086,0.765446133693339,0.02424093657882  
"Lrrc40",982.82866002527,-0.0517001015658248,0.180499457276305,-0.2864  
28016715216,0.774550318933863,0.854292460604845,-0.00814181906246199  
"Sox7",268.783793009238,-1.30567738710052,0.305720205531552,-4.2708246  
4121191,1.94751500045893e-05,0.000282874116063684,-10.6680482925095  
"Ctnna2",66.5811911612794,2.25573124558479,0.65243352921232,3.45741158  
997166,0.000545391164021665,0.00369928335372479,12.6312291495469  
"Mapk3",4092.147590572,-0.411816233012002,0.168733735280909,-2.4406277  
2821575,0.0146617600824292,0.0454708124840472,-1.27279410699758

"Kif1b",4413.42660398872,-0.289964409086961,0.268676934666566,-1.07923  
074768891,0.280484875915535,0.42430709214067,-0.248585853466177  
"Klk1b8",14.8770730006356,1.23798048696768,0.508416027536764,2.4349753  
3499407,0.0148928048260777,0.0459752863361089,3.81254819183528  
"Zfp26",1050.47068256123,-0.130383480482591,0.172867594168036,-0.75423  
899493766,0.450705726354668,0.591297285187951,-0.0685082223571197  
"Olfr410",0.139402981328555,-0.552173327754808,4.78471990596623,-0.115  
403479954236,0.908125320788657,NA,NA  
"Aldoart2",0.416614531504501,2.23848766382974,3.66037810559906,0.61154  
5474060634,0.540838523000997,NA,NA  
"Calml3",157.156241616577,-0.17882191585692,0.413795285421538,-0.43215  
0684546228,0.6656318991389,0.773542184373005,-0.0459170105789116  
"Klk1b1",3.25537066465181,1.76886594481967,0.979402628829261,1.8060661  
598735,0.0709080059225043,0.151580342010414,3.33721233392645  
"Olfr177",6.10477137985945,0.09116490059731,0.750356360104107,0.121495  
472610723,0.903298600474285,0.940839535899979,0.00555947987079138  
"Kcnma1",107.039104590111,0.480682426775975,0.429357448352395,1.119539  
04286634,0.262910244279605,0.404755147490227,0.434764261597215  
"Bbs5",306.991311176904,0.558405923682876,0.192688504319133,2.89797217  
356588,0.00375583911282182,0.0160173558665354,2.30849610282332  
"Clip2",2018.99060864621,-0.114825516303628,0.19472567306887,-0.589678  
363895124,0.55540630329994,0.68474942154551,-0.0434846889149218  
"Csn2",4.9588139667897,-2.68466504040058,1.31482091756677,-2.041848440  
75106,0.0411665674910143,0.100045585558993,-6.18044616100065  
"Numbl",773.935672651049,-0.912260890450976,0.236292200103118,-3.86073  
21361131,0.000113047781754402,0.00109335597651157,-6.22025401537933  
"Rps4l",1351.33426106826,-0.333080609381158,0.233161932882,-1.42853769  
165537,0.153137153846331,0.272414420989182,-0.433148271870435  
"Hspb11",1266.08507848898,0.457477454401639,0.180904643069384,2.528832  
02243836,0.0114442784792422,0.0376672082694573,1.50005273063303  
"Klk1b27",17.7529900214357,0.912823455446882,0.434974446230818,2.09856  
800406729,0.0358549993395276,0.0901299469421487,2.19671219696152  
"Pstk",783.107542429082,0.131391133519387,0.241749041995224,0.54350218  
9026183,0.586784084106469,0.710231303737534,0.0449573922909279  
"Olfr107",410.157884110191,0.966566030127293,0.328210842913026,2.94495  
459549284,0.00323002059189816,0.0142809391158345,4.10677432032165  
"Cd300lb",110.809286135433,-1.51212385486486,0.469898598049725,-3.2179  
7907280592,0.00129097236589103,0.0071509599971998,-7.47066100894406  
"Nol7",2868.23585147137,0.198055522896229,0.154307877921407,1.28350882  
381458,0.199313870194108,0.330714138460108,0.219148615677113  
"Olfr1351",1.43136290452813,-2.32021181218386,1.95410353255885,-1.1873  
5357340335,0.235088184551361,0.373036775227565,-2.28791045233224  
"Ldha",26446.1491060653,-0.646659240244832,0.492721631161679,-1.312423  
07897101,0.189377424075041,0.318716006395577,-0.739425634725249  
"Serpina11",0.359195194994468,0.788535355735455,3.03260128115015,0.260  
019462709055,0.794848760748061,NA,NA  
"Gpr84",13.0338983466663,-1.7144082946672,1.02077540883452,-1.67951566  
997939,0.0930515875188483,0.186773713551833,-2.87653278583881  
"Ptptmt1",1154.78507164006,0.138697215055144,0.285238303471208,0.486250  
315498543,0.626789701204319,0.7433786857714,0.0411306165180299

"1110038F14Rik",1505.3778460245,-0.0972490307143942,0.111657201661103,-0.870960665927845,0.383775630386812,0.528420950454034,-0.0620314668959304  
"Grm4",1.15715274304469,0.509959983470477,1.85450218623591,0.274984838117416,0.783327886869754,NA,NA  
"Olfr133",0.530923124499155,-0.544606389476996,4.56317854809431,-0.119348034212783,0.904999629619849,NA,NA  
"Zfp993",161.680246921618,-0.282355538716626,0.325931134644582,-0.86630428548818,0.38632331678704,0.530684234938263,-0.178897108101195  
"Scoc",3025.48876582374,-0.0276843083851579,0.237756194560331,-0.116439903643112,0.907303911927614,0.943127331475567,-0.00162102636719405  
"Syt10",0.0924858472248133,0.894311575740255,4.78471990596623,0.186909911826836,0.851731267640797,NA,NA  
"Parp10",2419.06542923514,0.264175697340182,0.216247464331534,1.22163604626211,0.22184529096476,0.357719110422667,0.271574521124738  
"Naa15",6172.07954528818,0.471102023632358,0.328268202425629,1.43511317925802,0.15125484857128,0.2698231507267,0.617138248311733  
"Hacd1",648.118485306632,-0.0762740631296471,0.213402016811844,-0.357419598320374,0.720777707089439,0.815370372060216,-0.0155685144785784  
"Zfp35",1076.74460087665,0.586411166566463,0.165254988429362,3.54852323757309,0.000387397814070074,0.00282315760891892,3.44217449671277  
"Gm8995",1355.2306522137,-0.848716992078082,0.337928352059145,-2.51152940233183,0.0120209271591273,0.0390283966845544,-2.75278451874634  
"Tmem117",515.440450296107,1.08141809603966,0.374465425807352,2.88789837862364,0.00387825146989013,0.0164137501975077,4.44423459660857  
"Luzp2",16.4573969661189,-0.621821188279678,0.514235910682369,-1.20921385566898,0.226580695922821,0.362742831626959,-0.630564708414978  
"Gm12657",0.114810471722162,0,4.78471990596601,0,1,NA,NA  
"Rpl27",7027.85107556442,-0.197389579471517,0.209507866061152,-0.94215832170188,0.346111588704732,0.490834515714951,-0.140471947456993  
"Usp31",851.894913280455,-0.286673457585362,0.145218244934506,-1.97408705575978,0.0483718449365142,0.113550955041194,-0.623659138918628  
"1190007I07Rik",424.875914989965,0.26617504231351,0.279472384948472,0.952419833403525,0.34088410483317,0.485536333274729,0.19231177609825  
"Gm9396",1.93079009684823,-0.706300598197209,1.31581617159808,-0.536777563190603,0.591421271680144,0.71455768714955,-0.237381660753961  
"Krr1",1863.09030555955,-0.0914183411201913,0.0875305266791482,-1.04441666911584,0.296292654755986,0.440698312795195,-0.0749077074518242  
"Slc39a4",284.487270847695,-2.0815897663289,0.494537870749534,-4.20916150096652,2.56320133547168e-05,0.000347547285389616,-16.5790503131672  
"Mapk1",4921.96079253226,-0.187069643104531,0.206135878063708,-0.907506470303611,0.364139029447687,0.509068817392343,-0.126304198245134  
"Alg11",869.404649456084,0.0921351278390756,0.148340004737024,0.621107758506629,0.534528724813858,0.666636878171889,0.0373616965119708  
"3300002I08Rik",21.0303835608117,-0.570562194572299,0.56659393811514,-1.00700370439959,0.313932994028052,0.4590913911017,-0.444186080200906  
"Bcl9l",3606.38902442724,-0.594680641178624,0.194415445003094,-3.05881377464204,0.00222215236526694,0.010845438502622,-2.69034158490456  
"Zfp947",138.176820980531,-0.144847576752163,0.158471175254268,-0.914031062871557,0.360700523768593,0.50596682103885,-0.0986823629746723

"BC023105",171.553629718082,-0.942646359615221,0.678084139543649,-1.39  
016134524194,0.16447988849466,0.287085208653557,-1.17640023409312  
"Tmed5",5133.89783568457,-0.545691808380729,0.385570161319101,-1.41528  
536988916,0.156984842770892,0.277682161330569,-0.699182976485509  
"Stk24",1479.28930020777,-0.732116543443376,0.173864548134868,-4.21084  
431125928,2.5441804228136e-05,0.000346061422803521,-5.8341593324901  
"Gm10131",57.2712463856805,0.0411669568875954,0.990732661723551,0.0415  
520336394062,0.96685581179861,0.979820926114828,0.000839207042911213  
"Cyp26b1",351.566767082804,-1.27708814011039,0.392177901767101,-3.2564  
0005302697,0.00112834647728466,0.00645365198418784,-6.44049483277713  
"Ddo",2132.14482229554,0.954772557582474,0.299385914580079,3.189103131  
0596,0.00142714952615384,0.00774465946589133,4.64091240335207  
"Wscd2",392.892686179497,0.323002618238427,0.278507490745151,1.1597627  
6750844,0.246145406888251,0.385241864144093,0.308107004748878  
"Sorcs3",42.1103353084871,1.34108841376017,0.567554240723194,2.3629255  
4532113,0.0181313118554731,0.0532897676451635,3.93208590451279  
"B9d2",764.412669451587,0.555077794881762,0.175977568708321,3.15425311  
848575,0.00160909458167708,0.00850016964333234,2.64642728275189  
"Gm7117",0.993759768984742,-1.3044576842138,2.12282394945331,-0.614491  
69374113,0.538890460257623,NA,NA  
"Nmral1",343.573686859406,0.0403487640878754,0.149640227126996,0.26963  
8484667845,0.787438390071507,0.862700102804643,0.00595903447356504  
"Plppr1",95.6423165616664,0.993570301062827,0.511194505681827,1.943624  
76517155,0.0519407171545034,0.119723383742583,2.10892383795207  
"Ube2d2b",0.076442125834245,-0.544048378937456,4.78471990596623,-0.113  
705376621746,0.90947135024012,NA,NA  
"Syne2",10496.1643878206,0.0829385586943958,0.221019042856492,0.375255  
261367899,0.707470635262532,0.806116318744089,0.0178755178843023  
"D630045J12Rik",2204.9060944669,1.42953190496945,0.373890216909128,3.8  
2340013276382,0.000131623917555751,0.00123052468075979,9.5783135381042  
5  
"Rps15",23991.1083771746,-0.0542754833717193,0.198989705039446,-0.2727  
5523304565,0.785041373962279,0.861018238024753,-0.00812176120926826  
"Lrmda",239.788897592071,0.26038916384343,0.338840820254779,0.76847046  
8368126,0.442207728942959,0.583643559123388,0.140210405920083  
"Snu13",2702.14542181713,-0.352521809077542,0.285955729036921,-1.23278  
456516612,0.217656151409408,0.353037154993813,-0.367039352576717  
"Zkscan7",1213.64967958024,0.708919214407568,0.196887546837119,3.60063  
003372195,0.000317447016407845,0.00241497539052679,4.27199410384443  
"Arhgap22",854.464059133181,-0.346768359214798,0.207586577272545,-1.67  
047582638023,0.0948252583065424,0.189601972098892,-0.576616237033642  
"Snrrp70",24592.0335750289,0.109814941754686,0.164538983960525,0.66740  
9869147068,0.504510363649378,0.639260662232621,0.0491359254093921  
"Ly6m",68.713374916635,0.220543924734993,0.356729196510162,0.618239064  
513213,0.536417762879086,0.668157622653313,0.0889301850772951  
"Eno1",32373.7284790434,-0.466771135009511,0.473356142293371,-0.986088  
683138332,0.324089596509216,0.468999024272306,-0.353417907809801  
"Stmnd1",7.70716839308464,-2.3616205130514,1.03178594679187,-2.2888667  
1735972,0.0220870975811574,0.0622332700343073,-6.55790260761648  
"Sema3e",299.786728982342,-0.66455931092015,0.420694123820082,-1.57967

338570282,0.114181683586946,0.218095069218092,-1.01200701025862  
"Zfp773",195.310400801846,-0.683750498294101,0.189928745806723,-3.6000  
3692642664,0.000318171992615193,0.00241896552946472,-4.1191969615053  
"Gm4825",0.475778629580389,3.01552289244636,4.43790190110927,0.6794929  
13462694,0.496825596259572,NA,NA  
"Olfr322",0.366265052029919,1.57162220126222,3.14848280519761,0.499168  
106831563,0.617660960704384,NA,NA  
"Nup98",1913.06771975934,-0.262680462364125,0.108184844757206,-2.42807  
079821251,0.0151793797946399,0.0465650640710964,-0.805615949103981  
"Gm10132",4.46936901093999,1.65513689477596,1.04654861918502,1.5815193  
5269368,0.113759337557771,0.217501428093884,2.52499386228728  
"Aox1",739.76261178331,-2.8659412366516,0.628091052237561,-4.562939125  
53242,5.0442443862484e-06,9.99519075640969e-05,-26.3976729081314  
"Col23a1",426.438445435728,-1.31841913928787,0.524511084160255,-2.5136  
154012811,0.0119500673996322,0.0388639170109569,-4.28181539155379  
"Jazf1",61.7678838588185,-2.20761716854043,0.390757303240326,-5.649586  
45746076,1.60834279534219e-08,1.17451190350494e-06,-30.1442572060464  
"Klhdc3",3091.9529356028,0.183808659877232,0.114964831026153,1.5988251  
2100956,0.109859465582836,0.211589568760367,0.285474493741822  
"Gm5513",0.494188968759859,1.38485917004204,2.50481940637188,0.5528778  
50802005,0.580347055126103,NA,NA  
"Slc22a28",4525.54126359786,2.16189663092765,1.01503672851842,2.129870  
3487146,0.0331823187336551,0.0849624229374664,5.33025603037123  
"Gng8",125.161939061978,-1.43779872208468,0.44445268949499,-3.23498711  
126797,0.00121648221938014,0.00682953363474632,-7.1695817311618  
"Egfem1",29.814732625603,1.89034734191197,0.780013635796074,2.42347986  
645477,0.0153726053592625,0.046987781673444,5.78043203223094  
"Ccdc102a",681.413680944057,-0.915052025989024,0.23325728171503,-3.922  
93016218435,8.74785148427458e-05,0.000890016462292256,-6.4275730422082  
4  
"Olfr64",0.200371616173885,0,4.78471990595729,0,1,NA,NA  
"C230062I16Rik",333.829887598726,-0.254557059420672,0.217770473912906,  
-1.16892366006642,0.242434389950985,0.381208527037445,-0.2454970525569  
42  
"Unc5d",2.40359442614364,-0.000807665424875883,1.47104063767452,-0.000  
549043584650846,0.999561926622609,0.999869610367721,-1.05318064094865e  
-07  
"Sox11",405.422066562684,-0.569304213801551,0.513792316717278,-1.10804  
345506556,0.267843049275065,0.410050547641742,-0.507520382882689  
"Jakmip1",136.306011891346,-1.60902786985566,0.386141867749911,-4.1669  
3449801658,3.08723158943636e-05,0.000399965724457343,-12.5892459681668  
"Slc22a21",452.990326437217,-0.0335049154485107,0.230527008210293,-0.1  
45340520872707,0.884442023333082,0.927951660474155,-0.0025053514140216  
7  
"Zbtb18",2768.03148744133,-0.203488306017521,0.130722584438949,-1.5566  
4231158584,0.119555432184743,0.225902879807939,-0.302719400308865  
"Brwd3",478.827073858349,-0.0351384618086467,0.152313015582044,-0.2306  
99009368108,0.817548643179374,0.883084784483488,-0.00436890777062488  
"Nkx6-3",1.89352310902243,-0.379641886531228,1.52124209780815,-0.24956  
0465805034,0.802927275017901,0.874452495636881,-0.0509317334026154

"Crb1",12.2668168136022,1.12989510766246,0.654853849372997,1.72541569198119,0.0844525853772797,0.173332264177495,1.98019193592587  
"Glyat",14942.3137994513,2.15198155465348,0.743958799442972,2.89260851039701,0.00382057183735982,0.0162189222044071,8.86955699373013  
"Gm13910",4.1894752743101,-4.34091484963411,1.68595913016497,-2.57474500536045,0.0100314011709958,0.0338687896159438,-14.6951312595945  
"Pcdhb5",24.6123189007683,-1.3934822310746,0.415272587141011,-3.35558443832804,0.000791974754772345,0.00492251315541957,-7.40487549750466  
"H2ac21",0.277473179874147,0.850500482667078,4.78471990596024,0.177753452528668,0.858916604581346,NA,NA  
"Cycs",10673.1237334529,0.508041482202257,0.388362007359976,1.30816473438235,0.190817440642364,0.320654870089184,0.577841253343142  
"Gm8730",1.78914684578218,-0.322877245287965,1.13152265207959,-0.285347575406076,0.775377867290818,0.854721712824309,-0.0506850585139642  
"Sfxn4",326.199506970315,0.104366672255048,0.189112390964841,0.551876435608344,0.581033014110447,0.705503905164123,0.0364075801679511  
"Mapk15",1826.7847164098,1.31430553890531,0.576420146459099,2.28011728420491,0.0226007333782762,0.0632599913019853,3.62814332978149  
"Klk1b24",17.5181074314412,1.61881207490639,0.661063948541498,2.44879799976684,0.0143333807569183,0.0447656988624687,5.02853712754407  
"Olfr816",0.931107979858005,0.216699203128391,2.11146727103911,0.102629676576397,0.918256888696063,NA,NA  
"Tnfrsf11b",55.073875386365,-1.84559176776512,0.342718064902106,-5.38516044753081,7.23800530914075e-08,3.55039726542117e-06,-23.1593179652847  
"Magea6",0.170193115163588,0,4.78471990596387,0,1,NA,NA  
"Hsd3b2",6692.59373595401,1.61254453830489,0.3994873496606,4.03653467293743,5.42465117307915e-05,0.00061422676290765,11.9250029006847  
"Gm4963",0.113058343341289,2.23400583696369,4.75316341366045,0.470004004184502,0.638352156775581,NA,NA  
"Gm10136",31.2001126574191,0.362878882624992,0.486053411417314,0.746582318117778,0.455315724974207,0.595502613252223,0.188098088045464  
"Rnf217",615.440050198209,-0.298512878433968,0.215233460330161,-1.38692598249389,0.165464334086567,0.288210075577978,-0.371369613861678  
"Chadl",224.208552660515,1.20934121686104,0.267280546132747,4.52461368535372,6.05059225629715e-06,0.000114984841923277,10.9695837686888  
"S100a7a",79.1061985561907,-1.3107775213088,0.311505074275937,-4.20788497380205,2.57772013842978e-05,0.000348742890696582,-10.435330032958  
"Olfr1469",0.243520746770568,0.888260281139142,4.05231079463612,0.219198458892861,0.826495455919406,NA,NA  
"Chil4",2.49427049634368,-0.0806719147318114,1.13029635867022,-0.0713723565620621,0.943101409755884,0.964723324454133,-0.00289724543109469  
"Olfr282",0.168656668059472,-0.46904334433082,4.78301879384393,-0.098064290471639,0.921881242889596,NA,NA  
"Utp14a",1176.68615087072,-0.315635967936344,0.105011577381618,-3.00572542386735,0.00264948126529915,0.0123380906880351,-1.38724027912533  
"Chchd1",1157.94428320868,0.0159803762805799,0.263653757607028,0.0606112214201717,0.951668836555876,0.970026607515629,0.000486311254257132  
"Slc22a8",11042.7598814236,2.46393601766532,1.1440478121315,2.15370021387017,0.0312636893707186,0.081158223319168,6.18781718845755

"Prpf38a",900.067851610309,-0.812161632287282,0.24344544809973,-3.3361  
134440048,0.000849584876642607,0.00520100656978887,-4.27107932656016  
"Ap3s2",2071.61349228552,0.247287574055228,0.13522772441908,1.82867511  
168692,0.0674482930380251,0.14583131710528,0.476103925491988  
"Hspbp1",1749.22776701,0.136149614337821,0.194984064874049,0.698260211  
293512,0.485014477505137,0.622441990314558,0.0645491915621759  
"Lin28b",0.899471427283934,-3.3717296835971,2.58883004537937,-1.302414  
4592323,0.192774742373655,NA,NA  
"Gpatch1",957.871167345484,0.283650940816869,0.18473226477665,1.535470  
48838392,0.124668300803333,0.23312386391708,0.413048347899277  
"Alms1",475.820728251113,0.308824793698032,0.240879252908896,1.2820730  
3023658,0.199817028786252,0.331351626745565,0.341120193135267  
"Arl9",19.2373193177859,0.578836182457713,0.445069152253229,1.30055336  
23871,0.193411379515394,0.323647020064466,0.652986140094548  
"Dupd1",3.80823966247455,-2.49048824736448,1.21284610450294,-2.0534247  
8169161,0.0400313978868952,0.0979706534452973,-5.78562161774582  
"Olfr532",0.553986404314375,1.40630323756961,2.36422375651366,0.594826  
624889086,0.551959368375755,NA,NA  
"Cdc42ep5",643.363694644639,-0.383879245059556,0.202419122948063,-1.89  
645740712973,0.0578995870108392,0.130150581915765,-0.782754032798773  
"Olfr1276",61.3651401795724,0.448189936437707,0.513814074428567,0.8722  
80380673022,0.383055438020551,0.527831443853336,0.286383635311629  
"Ppcdc",2234.45331601544,0.481642791183823,0.21239878836903,2.26763436  
308779,0.0233515014456338,0.0648956064975725,1.31728116334702  
"Rnf183",1161.31936642554,1.19437398633195,0.621219922973516,1.9226266  
6112669,0.0545269532326196,0.124122437613076,2.49204555725915  
"Gpx1",56650.3087408941,1.3717430645787,0.466320845781102,2.9416293030  
6277,0.00326490504732348,0.0144025155232383,5.81667399407072  
"Chd4",14951.4434825167,-0.0872332253984133,0.161448219036589,-0.54031  
7049757257,0.588978402223781,0.712356608557738,-0.0295874721334744  
"Slc24a3",573.93378350133,-3.22933548525579,0.760953905919605,-4.24379  
907920069,2.19767137199487e-05,0.000308496734421569,-26.1052999352348  
"Rps6-  
ps1",13.9999388255118,0.107009388851936,0.628835655716543,0.1701706763  
58994,0.864875912218435,0.915014646177368,0.00950406103076347  
"Uqcrh",12826.5345272142,0.443346987932143,0.416111186273751,1.0654531  
830838,0.286670900841126,0.430757492647987,0.373391270830224  
"Ptcd3",2356.87658786301,0.286050437495806,0.179364302378856,1.5948013  
8300656,0.110756657696826,0.212950725941497,0.442432630857769  
"Gm6498",0.372546961464118,-0.0605868623489469,3.79155121162696,-0.015  
9794392762399,0.98725079468246,NA,NA  
"Nlgn1",18.5773947378311,0.534599731202652,0.697031714554581,0.7669661  
50950927,0.443101641033899,0.58438824383651,0.287181477749748  
"Rpl7l1",3574.90118748538,-0.245336433353739,0.239283409838916,-1.0252  
9646129206,0.305223325017491,0.449916416661541,-0.195948603401767  
"Crem",877.354748762259,-0.587654039821075,0.188487453539104,-3.117735  
57755216,0.00182246232316476,0.00929732348955169,-2.74906247398329  
"Zkscan8",1003.94429408602,-0.29024472230186,0.184333789178911,-1.5745  
6060332029,0.115357902536456,0.219696071855424,-0.439868831146812  
"Nupl1",0.593981251429278,-0.0916877617371116,2.04416815187963,-0.0448

533363817473,0.964224211554276,NA,NA  
"CAA01118383.1",2117.11003235084,0.460831258191157,0.183903353483584,  
2.50583390385154,0.0122162991497041,0.0394948434456857,1.4892154558225  
7  
"Gm7964",0.622052128432502,-2.17186886455287,3.1709959441155,-0.684916  
948122645,0.493396330585885,NA,NA  
"Klk1",51468.9473938986,2.54691389648783,0.810219197075768,3.143487473  
11853,0.00166947561204693,0.0087456839021201,12.0703215237908  
"Dpp3",2733.51632214618,0.131484012956523,0.0898516800166202,1.4633450  
6969933,0.143372981113293,0.258990079091037,0.177630368288406  
"Srrm4",86.7726993286989,-0.687035707374813,0.450556768103153,-1.52485  
936515223,0.127294179026621,0.236428590490624,-0.990780417874804  
"Cyp4a32",6.52888267316328,2.6516238880714,0.85646745764415,3.09600074  
632738,0.00196149867756143,0.00984181709086279,12.2534587147379  
"Pepd",7851.34632832728,0.885502397805126,0.316357566629115,2.79905553  
466105,0.00512523218535132,0.0202459409392243,3.45328309481551  
"Zar1",10.6543340332759,0.756081462923072,0.56767978750687,1.331880189  
435,0.182899561831517,0.311073696146945,0.882895551234473  
"Brpf3",2078.70529621364,0.18915977373452,0.171090743475419,1.10561079  
981336,0.268895013298008,0.411209017198789,0.168097520732323  
"Amd2",44.7686062254749,0.7573253092923,0.415651876903409,1.8220182594  
491,0.0684522151369566,0.147592755804532,1.4489893388511  
"H2ac19",869.47611807928,0.52143985563295,1.12099753864721,0.465157003  
165422,0.641819027178705,0.755302778546452,0.146335097206377  
"Krt88",6.07079606936757,0.466772431131935,0.801640591135998,0.5822714  
52185917,0.560383851442562,0.688661342897804,0.174108753397687  
"Nr6a1",500.980199072202,0.100701703653198,0.310406311525229,0.3244189  
95085456,0.745620840751661,0.834708339724171,0.0181940697294092  
"Slco1a5",9.74300762253968,-1.44078852323134,0.982447619898293,-1.4665  
2960834746,0.142504061049982,0.257702112998752,-1.95363858397801  
"Olfr190",0.0995512495944413,-0.0588944016436733,4.78471990596623,-0.0  
123088504240835,0.990179206273825,NA,NA  
"Dppa1",6.73278421811726,0.0703985199995129,1.24482980337523,0.0565527  
269741087,0.954901492646198,0.972249458663558,0.00198121588500366  
"Gm648",1.79673336676111,0.448991826677777,1.2516686116453,0.358714617  
032366,0.719808592380967,0.814557628220783,0.092092758721788  
"Klk8",157.281136271744,-0.302938411811796,0.275327012943138,-1.100285  
83310262,0.271207602743573,0.413674868050863,-0.267396149490089  
"Pym1",997.007225288486,0.022567693571963,0.153970179379139,0.14657184  
6983382,0.883469976497488,0.927519793331252,0.00169801908652122  
"Mro",6.95507055593761,-0.0416221423840368,0.977780671949172,-0.042567  
9741665015,0.966045925251498,0.979458345928641,-0.000863891221254415  
"Gpn1",1269.0885527398,0.0525344434041732,0.108448318921373,0.48441915  
8606429,0.628088424349328,0.744375644174763,0.0155086653770599  
"Ccr1l1",2.70340709969941,-1.95153039067919,1.04778905905546,-1.862522  
20693963,0.0625295182401407,0.137669438419858,-3.86968930156294  
"Scgb3a1",3.54536605516365,-0.476319731769005,0.891093879900283,-0.534  
533725921569,0.592972322236701,0.715801307449027,-0.159258766515044  
"Dzip3",627.416514333528,-0.179775775022522,0.204743089934941,-0.87805  
539654426,0.379913656789507,0.524651638223798,-0.115959111147012



"BC048507",1.0419809612146,-2.56198920222342,2.09443635734698,-1.22323  
564200762,0.221240707205039,NA,NA  
"Ipcef1",724.865633997141,0.373197256625405,0.201421411425542,1.852818  
19834414,0.0639084209297961,0.139897617487064,0.734020944577951  
"Mtx1",2240.18996766406,0.753663307797622,0.168019243609166,4.48557731  
607659,7.27167713815997e-06,0.000132383903678658,6.73006599389582  
"Fbln2",730.61981455208,-1.49246599949006,0.334810041493682,-4.4576500  
5383872,8.28630306433889e-06,0.000147012135712902,-13.1710056080996  
"Gm8973",0.526410861081002,1.35123143778089,4.78471990595161,0.2824055  
46059263,0.777632562862021,NA,NA  
"Olfr1202",3.85049810931521,-0.542194415901651,0.867981481903284,-0.62  
4661271243648,0.532193396740994,0.664577100656839,-0.221543012868677  
"Vrk2",386.564860134542,-0.732590516366397,0.165944183377628,-4.414680  
29463431,1.01159377578956e-05,0.000172747826733781,-6.34692810215213  
"Cnm2",1318.53702735303,0.690533781694126,0.218968248045807,3.1535795  
1601124,0.0016128128382115,0.00851650835901745,3.2909105685065  
"Hcst",115.112793241232,-1.40046294146546,0.391347717905469,-3.5785642  
2150837,0.000345486978565212,0.00258293907517811,-8.3451168810557  
"Cadm2",36.5765071742695,-0.703976956011416,0.567667910341237,-1.24012  
110458779,0.214930604006073,0.349707363127098,-0.739639428660613  
"Mocs1",1328.87229941893,-0.0597206760255675,0.281871784877935,-0.2118  
71777274301,0.832207069213185,0.892673419561928,-0.00678035569304186  
"Olfr96",0.136691745128845,0.404158340305515,4.78471990596623,0.084468  
5474277305,0.932683908963291,NA,NA  
"Prr36",54.6596919523341,-2.04213363273418,0.437156658713515,-4.671400  
0393906,2.99153673769623e-06,6.60577387447351e-05,-19.6554981678959  
"Med14",1867.40943130435,0.516096018945649,0.193108984968876,2.6725634  
6994331,0.00752741331775126,0.0272400714308675,1.85952810913494  
"Cenpj",401.469596350125,-0.194302320102444,0.199146295190092,-0.97567  
6298255891,0.329224901302782,0.474028765207942,-0.145044209077779  
"RhoX8",165.153754525826,1.11842916602089,0.397226085331463,2.81559848  
993206,0.00486864711727516,0.0194805831095077,4.40475101950299  
"Fam172a",936.806182975072,-0.298934568965569,0.113085325506737,-2.643  
44261844795,0.00820676747743356,0.0290251319200072,-1.05810676945695  
"Trim38",2.22078245063507,-1.90652887995471,1.3109585161667,-1.4543014  
5686798,0.1458627467374,0.262364560506072,-2.55097432500382  
"Zfp69",166.732823140366,-0.207510258546571,0.472974522910674,-0.43873  
4537474783,0.660853898534663,0.769692076764415,-0.0543188697933475  
"Arih2",2589.24469204602,-0.0798616534904005,0.0936100502482827,-0.853  
131189210804,0.393586557119,0.538083767403327,-0.0494935433475123  
"Rab44",94.6731283001098,-1.92041507994741,0.536764414534638,-3.577761  
54295244,0.000346549387052174,0.00258840673213775,-11.4393609994985  
"Izumo1",18.7662331241692,-0.681050473582412,0.462069004268367,-1.4739  
1508041267,0.140504456867176,0.255008461323298,-0.930627244456755  
"Krt39",0.629196789444319,-1.71073826900845,2.55186234064192,-0.670388  
148201646,0.50261038787367,NA,NA  
"Ghrl",4.77681351427756,-1.1640756443686,0.733457944159642,-1.58710619  
148359,0.11248859585634,0.215566449579078,-1.78625785634887  
"Tnnt1",85.4451978126468,-1.52997771059441,0.365735875574867,-4.183285  
84306798,2.87325751782829e-05,0.000377370110037745,-12.0597190241892

"Rab3ip",7388.74460156722,1.32638431832166,0.31720683943884,4.18144930  
502797,2.89656838064502e-05,0.000379806928620152,10.4464006399619  
"Gm4735",9.40613319274353,-1.07335714404156,0.850171158068098,-1.26251  
888676231,0.206762134571929,0.339746182543081,-1.15874964098085  
"Zfp936",4.396954818298,0.595101907540135,0.874899660887694,0.68019446  
5884614,0.496381336009197,0.632092368816744,0.272984993683073  
"4430402I18Rik",280.168286978602,0.893731344281994,0.399941776243445,2  
.23465363552814,0.025440096689931,0.0694137986650258,2.38417994057418  
"Ano6",4433.81014114328,-0.149415477923646,0.138345401318565,-1.080017  
66953995,0.280134311882832,0.424007049611199,-0.128199256637499  
"Ifi27",7979.996113531,-1.52808728046296,0.412336586653001,-3.70592212  
751888,0.000210623011184051,0.00176075451034255,-9.69114918808396  
"H2ac18",2412.88639665481,0.674755378808338,0.371604844839567,1.815787  
35632376,0.0694029975464176,0.149159845013755,1.28388186511007  
"Gsdma3",0.0886915477092957,-0.544048378937457,4.78471990596623,-0.113  
705376621746,0.90947135024012,NA,NA  
"Paqr9",3419.54070506244,0.944202288557645,0.644911302050283,1.4640808  
5198052,0.14317185842354,0.25869380924309,1.27666546999873  
"Chil1",21.5938637494287,0.483714056594299,0.657168183808718,0.7360582  
39750532,0.461695255442398,0.60098364981747,0.246301175271204  
"Plcxd1",133.602928522729,0.317789117942862,0.568737643781887,0.558762  
236713726,0.576323998063263,0.701840316921959,0.112513036874493  
"Ethe1",3122.33434422059,1.17576115079583,0.381810419835664,3.07943704  
444184,0.00207392197166908,0.0102656680126013,5.3837517023883  
"Vmn1r13",24.8384610405299,0.706269575692038,0.541061967086109,1.30533  
953346537,0.191777258058676,0.321640234568168,0.801136864803899  
"Gimap8",1777.7179103142,-0.556018412880562,0.195562150699471,-2.84318  
0088232,0.00446658246134803,0.0182005067568159,-2.22757981550825  
"Zfp428",261.261629161291,0.217056344057209,0.230212960646487,0.942850  
235050489,0.345757512479045,0.490510766757597,0.154610981097702  
"Hvcn1",1023.90740451867,-1.51162154169052,0.283013463268643,-5.341164  
77793019,9.23512631212011e-08,4.28729744842185e-06,-18.6834215418293  
"Gpbar1",8.16245963230353,-0.517046882491904,0.622796776765317,-0.8302  
01603125411,0.40642480901066,0.550310480978462,-0.308817961246899  
"Ccdc146",8.48301553062952,-0.946047237684422,0.906664072386619,-1.043  
4374389559,0.296745741464072,0.441103031719637,-0.774317714618904  
"Rpl19-  
ps1",12.9408167387978,0.567034293751371,0.439678645106455,1.2896562070  
1019,0.197170051041229,0.328218360386058,0.631719388126004  
"Cdpf1",712.808376541405,-0.0570638896744593,0.232222358518479,-0.2457  
29524230624,0.805891615775966,0.876612257986041,-0.00751477259333484  
"H4c12",9.66880473568469,-1.57058501569102,0.789261809953034,-1.989941  
73528361,0.0465973541857779,0.110181325723296,-3.4641260587343  
"Tank",966.399584514182,-0.998134752066476,0.235098365310969,-4.245604  
81629136,2.18004567346767e-05,0.000307128110847346,-8.07315901485718  
"Cntn4",0.661672535484889,-3.210784261866,2.81361352825686,-1.14116037  
246068,0.253803191593253,NA,NA  
"Aox3",171.883752304536,-1.92331540110958,0.55726049873578,-3.45137580  
265044,0.000557736383759626,0.00375773821588713,-10.7396740329142  
"Clasp1",1374.11632113794,-0.366255489371442,0.127155654100946,-2.8803

7124232541,0.0039720715647497,0.0167151848145622,-1.49851151791144  
"Lrrc51",379.68225799016,0.347216700439865,0.295717324444048,1.1741506  
8965823,0.240334672987358,0.378670339709697,0.337178411633706  
"2410137M14Rik",2.21626338740161,-3.46363546066131,1.56909642512064,-2  
.20740765526568,0.0272855920386686,0.0732499619399642,-9.0535189743480  
3  
"Zpld1",50.4499379269067,0.500837196612993,0.491951398076603,1.0180623  
5040927,0.308648326142453,0.453574394266321,0.395959873371245  
"Gm10146",35.3946948654956,-7.95785130093545,1.53383248314778,-5.18821  
409010982,2.12320427711416e-07,8.10141624171661e-06,-93.293644256024  
"Hhip",98.3062972234004,-2.24542677247693,0.540968607706432,-4.1507524  
4753474,3.31384035321664e-05,0.000419839241111228,-17.4596272634207  
"Siva1",678.443448143119,-0.508091268989559,0.216813541251886,-2.34344  
804321644,0.0191064232017182,0.0554948666150903,-1.46912799707872  
"Scn1a",3.25594957479165,-0.701257361037995,0.949423565147745,-0.73861  
3814508457,0.460141533248966,0.599618143593097,-0.358666670311904  
"Pde6h",19.2595871001558,-0.237482779565417,0.98697446339769,-0.240616  
944381595,0.809852016255516,0.878714224426825,-0.0307054662612231  
"mt-  
Nd1",433131.856220551,0.939772861487628,0.426863951687468,2.2015746651  
1881,0.0276953671576981,0.074023888806141,2.44657404619686  
"mt-  
Nd2",256853.86013508,0.960418328515304,0.524827313843769,1.82997016958  
077,0.0672543995789126,0.145480074978789,1.85141391636775  
"mt-  
Co1",1397823.60343892,0.689860331449601,0.465073138474775,1.4833372955  
3168,0.137984818098744,0.251491214752114,0.952246791708885  
"mt-  
Co2",818115.120482712,1.13785525568835,0.390499075496893,2.91384878245  
994,0.00357002790542205,0.0154273945256913,4.74668891454691  
"mt-  
Atp8",53563.9816640203,0.993507500361784,0.505563511904812,1.965148743  
86117,0.0493970243579319,0.115249872075022,2.14662467016506  
"mt-  
Atp6",631409.347338613,0.919096131599329,0.464445504890126,1.978910597  
52373,0.0478260728840631,0.112527183431092,2.00782106437929  
"mt-  
Co3",771602.997368587,1.03358951688082,0.421027240898394,2.45492314149  
397,0.0140914712961805,0.0441729111467728,3.22443086737229  
"mt-  
Nd3",69444.7895347792,1.13544695566065,0.45442254785291,2.498658926643  
26,0.0124664230097821,0.0400709389786897,3.65285085331364  
"mt-  
Nd4",427104.594886052,0.919676740980528,0.528682916955715,1.7395620540  
8764,0.0819359471229322,0.1693256064656,1.63328312608696  
"mt-  
Nd5",193025.051758745,1.10951872151135,0.511812948438449,2.16782073391  
562,0.0301723286595994,0.0790088724422334,2.81617500828995  
"mt-  
Nd6",6129.83958182931,1.34698054945545,0.398909908764326,3.37665352467

15,0.000733734116774484,0.00463620638581795,7.23848332817128  
"mt-  
Cytb",662656.571503976,1.09201080038051,0.472811322136105,2.3096122052  
3852,0.0209096332759626,0.0595002962076356,3.08140767130717  
"Selenop",61802.0747642451,0.816568221009368,0.357497764161759,2.28412  
119702066,0.022364409150199,0.0627606864724497,2.26060903115695  
"mt-  
Nd4l",34047.305526983,0.640180870000902,0.609667093235101,1.0500498995  
3433,0.293695171329269,0.437736466180866,0.528877887667026  
"C330021F23Rik",63.6513943825083,1.51704567876647,0.465410095355516,3.  
25958911056202,0.00111573724732067,0.00640373612531635,7.6624061044434  
2  
"Tacc1",6510.25114435528,-0.0686456300703247,0.294523322782105,-0.2330  
73664326102,0.815704204606738,0.882553069530513,-0.00857633491320109  
"Ifitm7",5.49516457498583,0.590431842643906,0.870126748173389,0.678558  
432875864,0.497417687975333,0.633173898572236,0.269833358718959  
"Cpdpd1",2360.46521004342,0.343705039328866,0.260024417527205,1.321818  
3222847,0.186228655617156,0.314843174128441,0.397213254337142  
"Cd209b",10.8228003203094,-1.48078925851601,0.75195302185798,-1.969257  
67364718,0.0489235090152288,0.114442583828658,-3.20988027039591  
"Aurkaip1",3132.81238375104,0.539133078373591,0.194533539771188,2.7714  
1452835189,0.00558133230487931,0.0215494687684231,2.06887149286531  
"Zfp985",24.5467242229223,-0.780298801630352,0.552901167909534,-1.4112  
8079830359,0.15816183400524,0.279052056947091,-0.995939783341763  
"Zfp979",221.183360756092,-0.982421266386979,0.327602303983227,-2.9988  
2282402165,0.00271024863774464,0.0125461604792842,-4.30137491507713  
"Zfp600",7.12051414757691,1.08564057880035,1.24054313547013,0.87513327  
651354,0.381501392850082,0.526434122985909,0.69657856336587  
"Zfp987",23.4468593596501,1.42947418447336,1.01409353020821,1.40960783  
388478,0.158655512562303,0.27969847956056,1.82121174244702  
"Dhrs3",8472.35648923007,-0.232167576015929,0.190716445717038,-1.21734  
428902052,0.223473250072614,0.359578943905235,-0.237465995853636  
"Ubr4",6396.55401977755,-0.345299733787442,0.225603745211973,-1.530558  
5173819,0.125878540648316,0.234823936620825,-0.500311431823065  
"Hnrnp",5176.70695158725,-0.37405381741044,0.102960218022635,-3.63299  
364156558,0.000280151924445522,0.00218671025734139,-2.29121318012318  
"Med18",229.015213583369,-0.238912528056725,0.164529434515544,-1.45209  
596544352,0.146474923615292,0.263231954996338,-0.318881252360347  
"Phactr4",2647.64594897891,0.41426520996075,0.190586021966925,2.173638  
9987333,0.0297322571823786,0.0781082660390755,1.05623518193367  
"Clnd19",2458.75792950821,1.07169916794989,0.589231607465258,1.8188080  
1092816,0.0689407257922684,0.14843267132262,2.04439885563916  
"Gm13611",1.31743898968851,0.647977463025532,1.68289053178418,0.385038  
391260396,0.700208972060895,NA,NA  
"Cyp4a12a",1382.35935892263,2.35497796421471,1.03980801228893,2.264819  
98251841,0.0235237286710353,0.0652254922678961,6.42886588569294  
"Cyp4a10",7576.69413155724,3.02128317082157,1.09625101669251,2.7560140  
194324,0.00585104890710337,0.0223869214267468,11.4786957567811  
"Insl5",8.01478282517266,0.431167724709622,0.778068392774384,0.5541514  
45700285,0.579475204440711,0.704094692851311,0.151271930109486

"Cyp2j11",3299.00022637504,2.09178745026896,0.688410186776729,3.038577  
1309735,0.00237698247885523,0.0113949260624006,9.35988515117719  
"Gm12666",0.313271247766557,1.64153920639172,3.84512216254614,0.426914  
708297522,0.669441452137437,NA,NA  
"Muc5b",6.38654389140978,-2.42571827619125,1.2965003139366,-1.87097392  
119094,0.06134869581505,0.135867431962954,-4.84191714512408  
"Adamtsl1",813.829859536121,-0.656073874649229,0.328766026133525,-1.99  
556469494439,0.0459813256371944,0.108949311857336,-1.45443215281702  
"Olfr45",127.470081233654,0.294242732416904,0.180532341743425,1.629861  
60582288,0.103130749841944,0.20195657262584,0.470700861634664  
"Kndc1",46.495221664477,-0.651056512313804,0.595866411720018,-1.092621  
60025848,0.274559974852927,0.417840336378581,-0.568148300071635  
"Gm11487",0.287672527837204,-0.552689009922618,4.78471990595926,-0.115  
5112568312,0.908039898540752,NA,NA  
"Gm11232",3.08922160287759,-0.591513282947143,0.922076317712874,-0.641  
501437120018,0.521196947489821,0.65461853144528,-0.250625720500278  
"Prpf4",1108.28924812991,0.00798080445086085,0.113965227570159,0.07002  
84167462197,0.94417104185993,0.965564196694897,0.000279668845968143  
"Cdc26",2000.25513007091,-0.430176032482586,0.26791978086654,-1.605615  
05048734,0.108358516527721,0.20935773552254,-0.672670923814283  
"Slc31a1",4565.63524135994,0.932486338066596,0.255880161790988,3.64423  
068806828,0.000268192793038411,0.00212224962608074,5.7397132094536  
"Fkbp15",2345.60287147005,0.1974190671239,0.102305788331251,1.92969596  
680772,0.0536445199949752,0.122640018396612,0.414284286352869  
"Slc31a2",1487.01085475923,-0.573263574205714,0.214848139022813,-2.668  
22685461959,0.00762527526007971,0.0274515541028497,-2.06107315760823  
"Mup21",1.4585459003585,-1.09682554978325,1.65886556404525,-0.66119013  
7137195,0.508490385543418,0.642920950762397,-0.484504589503183  
"Mup3",63.9180011990737,0.737391124889218,0.820145510663332,0.89909792  
2626946,0.368600504520243,0.513648701910784,0.491261549241761  
"Gm10155",1.37089980933064,-0.498015130186091,1.15468243228706,-0.4313  
00517147108,0.666249874381338,0.773937447166359,-0.127623462009313  
"Cacng3",0.177552406580748,-0.660080896433263,4.77942086897948,-0.1381  
08970632295,0.890154296180606,NA,NA  
"Anks6",847.784863692855,0.880029373860621,0.273107000913481,3.2222878  
6123066,0.00127171298698401,0.00707039059601203,4.35776426184721  
"Spag8",77.1246222628476,0.716791056790351,0.391146632810191,1.8325379  
7083863,0.0668713100077423,0.144872978058996,1.38476716163103  
"Gpr139",0.130265908122033,0.4.78471990595951,0,1,NA,NA  
"Arid3c",6.52961564577616,-3.16581375431756,1.18497359753295,-2.671632  
31392548,0.00754833073433445,0.0272853823986009,-11.4013748355599  
"Ipo7",4113.47713615145,-0.305865491770029,0.148190799771539,-2.063997  
84765028,0.0390179204618287,0.0961934413815915,-0.716151657989466  
"Tmem42",388.650231751618,0.477976197350759,0.157845920557578,3.028118  
78610703,0.00246081337214329,0.0116827219698198,2.12682405412951  
"Pomgnt2",451.728275190262,0.115562570015371,0.149276480754443,0.77415  
1222157158,0.438841369670063,0.580930750616259,0.0627647728297335  
"Gm10156",0.598921890720522,-1.06583569867507,3.12934459180828,-0.3405  
93906297544,0.733409317524594,NA,NA  
"Trim12a",2005.39012262399,-0.276447620259555,0.261551904447554,-1.056

95128025722,0.290533823024639,0.434286145456487,-0.230571591275568  
"Olfr639",668.699484969873,0.569572980269221,0.145315117395108,3.91957  
141472465,8.87065739180545e-05,0.000900904965479376,3.99390883644305  
"Olfr586",22.9880185644687,1.30334050860861,0.407965829978342,3.194729  
58967619,0.00139961911525904,0.00762284176238011,6.35587820181533  
"Olfr575",1.47827481272304,0.820822101153351,1.55916446351594,0.526449  
980332662,0.598575597055031,0.72065618964983,0.268895662828053  
"Gm10157",3.44816985251726,1.32735736075154,1.01697104210329,1.3052066  
4384535,0.191822492491677,0.321678417356388,1.50549261613275  
"Vps37b",1278.64529300048,-0.280134174225795,0.156987520729816,-1.7844  
3594066258,0.0743528553231675,0.157229321582148,-0.518262198861868  
"Chrna10",1.63949912031383,-0.940642491238357,1.69077590387703,-0.5563  
37767223569,0.577979973478092,0.70306653708128,-0.331391871718908  
"Numa1",5811.16196420372,-0.343691035999902,0.0932211406601412,-3.6868  
357710072,0.000227059786461201,0.00187117993086242,-2.15878734702884  
"Gm12918",1369.23715545525,0.627969113037003,0.523018987319257,1.20066  
217147425,0.229882273676486,0.366585799635571,0.630181247043642  
"Rtp3",269.781042751745,-0.55503875505867,0.318507724550223,-1.7426225  
8738767,0.0813995618657229,0.168502883242156,-0.988414357151414  
"Impad1",3760.05585441427,0.304986944601112,0.122996257417765,2.479644  
10465925,0.0131513576005001,0.041783472461227,0.96841114184519  
"Wdr6",2291.17735125728,-0.195207138443412,0.102976862924561,-1.895640  
75754004,0.0580075639590903,0.130273149282924,-0.397855940876301  
"Serpina3c",329.01614285394,-3.91631674686258,1.42598346717234,-2.7463  
9702143846,0.00602537985467685,0.0229234841768759,-14.7864195990666  
"Rps13-  
ps1",2.29673626039779,0.17931508543646,1.86081457782569,0.096363757879  
6186,0.923231675152813,0.95269495645036,0.0086897012507139  
"Serpina3f",148.809981925108,-1.33723067763407,0.58513543767886,-2.285  
33531132323,0.0222931739251648,0.0626599269455372,-3.70417331874043  
"Serpina3b",67.1595532148519,-5.87263749241046,1.58969435900498,-3.694  
19282338414,0.000220586371017052,0.00182865351279357,-37.0221366266702  
"Serpina1a",1931.72606448759,1.54085990748501,0.615092341211317,2.5050  
8712960164,0.0122421231808981,0.0395586539246189,4.97693250649399  
"Vmn2r65",12.8525899555865,0.952622361844183,0.535171731527595,1.78003  
116705177,0.0750708601774557,0.158326839560847,1.7557723476668  
"Gm10160",0.137867147183495,1.52980402031853,4.76402337946772,0.321115  
976657834,0.748122503326095,NA,NA  
"Iqcf5",0.657403543914238,-1.82649025439088,2.06791311730708,-0.883252  
89834682,0.377099646490576,NA,NA  
"Nrnx3",69.9275108905194,1.50552015573353,0.428015608657193,3.51744218  
033725,0.00043572726647693,0.00309501283853085,8.69884009387606  
"Akap13",5848.37558054649,0.672304822967455,0.410701445303484,1.636967  
26820784,0.101637308951229,0.199790729905339,1.082736705559  
"Gm10263",0.955987893766187,-0.103933494516231,1.83034204852125,-0.056  
7836457673032,0.954717541703264,NA,NA  
"Msl2",2621.36623466915,-0.207273884298759,0.110910795889095,-1.868834  
16205959,0.0616458904044481,0.136308864947372,-0.413062009170863  
"Plekhd1",652.393581586471,1.14435278629233,0.301948714996727,3.789891  
22806744,0.00015071326619026,0.00136782233847703,7.54647488805732

"Zfyve26",1508.30670629211,-0.141265367423723,0.130595152622468,-1.08170452414953,0.279383842234759,0.423101060651909,-0.121508588484687  
"Rdh11",895.694626739794,-1.19968677465413,0.382751960775493,-3.13437133600425,0.00172222761959849,0.00893458103779566,-5.65991348308409  
"Mthfs",605.922154783184,0.417019748514375,0.140790039838846,2.96199751766328,0.00305650248116405,0.0137190804276558,1.78858422461515  
"Gm10163",8.62374255757713,-17.2157639712312,4.72652856477767,-3.6423696028252,NA,NA,NA  
"Hmgn3",1485.23351636974,-0.320238078568834,0.109886899396202,-2.91425165627981,0.00356542361868734,0.0154158870270921,-1.33614748508572  
"Gm10268",0.301908241136152,1.72462839470195,4.71910893404076,0.365456364497445,0.714770773585799,NA,NA  
"Gm5786",3.79005419131831,1.80628590887584,0.696271783072708,2.59422534818881,0.00948043257680249,0.032463904879258,6.19127331406699  
"Cox6c2",0.2150827046657,0.389933306355673,4.78471990596623,0.0814955345389083,0.935047875989975,NA,NA  
"Ankdd1a",39.4795064201434,-3.34996433590634,0.903070156569535,-3.70952833679251,0.000207645717307158,0.00174361593284021,-21.278284038156  
"Klk1b5",75.5080231091068,1.87077929604118,0.464288595651552,4.02934578527791,5.5932294155894e-05,0.0006296581243947,13.7882674019565  
"Klk1b4",5.00245256934828,1.08220318656994,0.788570084993331,1.37236145165092,0.169950944141604,0.294412485406923,1.32328936014155  
"Klk1b3",20.3406783413331,1.69668151222869,0.733704723717741,2.31248546912914,0.0207509451691585,0.0591004862559526,4.79909101959067  
"Klk1b21",7.28805202994407,2.29486237375045,0.804204735073017,2.85357978343922,0.00432296713929144,0.017799189454776,9.24508797240129  
"Vmn2r57",100.897420557376,0.544091077119048,0.23454373834132,2.31978513247392,0.0203525037514197,0.0582379099127065,1.54696995936847  
"Gm6254",30.183799174599,0.203683830775546,0.330512320979263,0.616266982640946,0.537718326431236,0.66903400732284,0.081864684106704  
"Rpl17-ps9",4.82220928172436,-0.422953304193296,0.991099388902379,-0.426751654707111,0.669560222783138,0.776320632881409,-0.10708740219936  
"Hmgb1",20009.9365265372,0.249054091619765,0.14249820699163,1.74777000270883,0.0805038615929937,0.167074432500287,0.445636436697793  
"Gm6969",5.19451741395243,0.70881257070738,0.727411484385833,0.97443137195702,0.329842398952857,0.474471957435559,0.528457169736243  
"Gm10167",0.177797176040025,0.881996290743575,4.78471990596623,0.184336033890674,0.853749847295799,NA,NA  
"Lsm14a",3381.50420273688,-0.217985836356826,0.116148681537062,-1.87678270189635,0.0605478822386561,0.134460433700378,-0.437385375484124  
"4931406P16Rik",2146.38280964855,-0.844801569422774,0.212008115223222,-3.9847605292528,6.7548210864851e-05,0.000730885136205807,-6.10052691766571  
"Scgb2b27",0.207878628269907,0,4.78471990595668,0,1,NA,NA  
"Gm7589",1.02087712350588,-0.427338418450882,1.42565823395272,-0.299748150204316,0.764369267764283,NA,NA  
"Flvcr1",1500.38327105535,0.598191835558538,0.228204852773307,2.62129322969641,0.00875968817182885,0.0305375290495832,2.08697101257545  
"Insyn1",280.97907763588,-0.764663602757885,0.246636843326964,-3.10036

242940467,0.00193283977367012,0.00973057317506328,-3.54229074019042  
"Zfp932",1660.96978454997,0.0947618199470811,0.127813088904235,0.74140  
935611127,0.458445273312096,0.598245186818857,0.0486843206804838  
"Tecpr1",4318.88485864156,-0.428314468768194,0.197149160567678,-2.1725  
4015961768,0.029814943920439,0.0782927719505601,-1.09104544308078  
"Gm5121",0.0875622342969174,-0.0461884850902348,4.78471990596623,-0.00  
965333101999152,0.992297875841732,NA,NA  
"Rpl36-  
ps3",0.277112947373873,-0.580517282415661,3.92508582831329,-0.14789925  
8209374,0.882422273632024,NA,NA  
"Pgk1-rs7",0.201064824902743,0,4.78471990595705,0,1,NA,NA  
"Ttc32",778.562500144058,0.979750937012121,0.2232975334506,4.387647825  
17792,1.14583113128389e-05,0.000189494617453548,8.39759218281551  
"Fbxl18",1258.42048592016,-0.360626054331398,0.121515159214843,-2.9677  
4539622501,0.00299992708955758,0.0135416393905845,-1.55140821577713  
"Wdr35",965.128411369021,0.188230227233436,0.170153640540695,1.1062368  
4944559,0.268624017165193,0.410898316723096,0.167413752224981  
"Gm5113",465.094704739253,0.326609849475513,0.138531573219871,2.357656  
39474211,0.0183907067660405,0.0538734976749186,0.954065458360408  
"Lefty2",0.86776715402818,-3.35929712878989,2.14576105100158,-1.565550  
42660592,0.117453903293556,NA,NA  
"Ifi208",207.495331093295,-0.659681177157566,0.314267687616769,-2.0991  
059633277,0.0358075608848693,0.0900523438840682,-1.58809283545165  
"Pilrb2",120.512894630283,-1.47552087551736,0.419398474771092,-3.51818  
369468963,0.000434511469884546,0.00308862728392595,-8.52855275925892  
"Pilrb1",122.283484742658,-1.55925897472571,0.450538015671415,-3.46088  
214643113,0.000538408462734527,0.00366418436523484,-8.74611672248695  
"Zbtb16",369.663959090505,-0.938763237400177,0.539733584146724,-1.7393  
0854957689,0.0819805042751609,0.169399732127712,-1.66676856870993  
"Gm13083",5.04485819752826,0.195291503552969,0.924617550643057,0.21121  
3277767816,0.832720850303985,0.892943471331854,0.0221132479383323  
"Gm7493",0.426691390324114,0.584245706222807,3.79030033636024,0.154142  
324980993,0.877497516539398,NA,NA  
"Gm10172",2.19488262894844,2.25470332469202,1.54559390546248,1.4587941  
3520161,0.144621777292896,0.260733741438455,3.03089743552102  
"Cyp2b19",0.391680565706474,-1.00824900110039,4.78029942746444,-0.2109  
17541128838,0.832951616178297,NA,NA  
"Fxyd6",786.985877801093,-1.0688067339975,0.19008986764982,-5.62263916  
121208,1.88061960108506e-08,1.295700388055e-06,-14.489234848794  
"Gm8062",0.484204491427894,-0.0751684599104513,3.74348088051209,-0.020  
0798300591744,0.983979690183159,NA,NA  
"Clon9",19.0427408901464,-0.802702959611417,0.67059965793159,-1.196992  
79610027,0.231309362632649,0.368259161640515,-0.80187484716026  
"Zfp575",134.230768061891,0.830019756418508,0.325902882651386,2.546831  
588803,0.0108705880675684,0.036157408075989,2.7555605318424  
"Gm10175",5231.21080437253,0.123339995604353,0.388717439846974,0.31729  
987636497,0.751016071166845,0.83805364594581,0.0217908672597277  
"Vkorc1l1",1812.60358495799,-0.454958338278292,0.272957821510815,-1.66  
677157576987,0.09555983425545,0.190689350968454,-0.753915834390696  
"Tnfsf18",2.87051013491915,-0.00244122836461377,0.829855488409282,-0.0



0294175118283939,0.997652825534858,0.998383086969673,-3.95044858000917  
e-06  
"Psg16",4146.53227716062,0.00994083657920102,0.163522797214776,0.06079  
17473803021,0.951525062803238,0.969930765084564,0.000303499568415336  
"Obox3",0.57302791722238,2.16616667212636,3.07486637306466,0.704475059  
827521,0.481136976391801,NA,NA  
"Zfp648",10.3078613689507,2.14576220174216,0.754241800951544,2.8449261  
2188172,0.00444217247013862,0.0181391053838964,8.60383084182249  
"Zbtb6",990.079914721916,-0.455698000244974,0.108685092908237,-4.19282  
891564275,2.75497215037191e-05,0.000364921514863801,-3.60722710621102  
"Rnasel",835.994052676935,-0.235580239278442,0.186991817362044,-1.2598  
425032809,0.20772618361302,0.340814972070571,-0.253582233505797  
"Vmn1r84",1.69435730739845,-0.0112868647140866,1.55446259181751,-0.007  
26094328258469,0.994206656363437,0.996250456664318,-4.24001286983461e-  
05  
"Vmn1r83",21.0619134152034,-0.148578539676969,0.302040158990592,-0.491  
916505982229,0.622778369195874,0.740559511252631,-0.0446254577413183  
"Gm10181",0.425175793021684,3.14512962951297,3.60824695830013,0.871650  
323788997,0.383399168191587,NA,NA  
"Vmn2r28",0.118201189839426,1.38445453093496,4.78471990596623,0.289349  
127669654,0.772314220863517,NA,NA  
"Zfp810",1462.76361687641,0.887445225252443,0.263167304771621,3.372171  
27341322,0.000745780548995769,0.00468920643157675,4.75891784559486  
"Zfp772",498.373307081745,0.220796935726226,0.124979809577564,1.766660  
84283956,0.0772850448363421,0.161858625587433,0.402078286854185  
"Ecsit",2265.42395503252,0.991387570094539,0.257573135087921,3.8489556  
3644918,0.000118622486260586,0.0011376789164333,6.72038349080508  
"Hmcn1",231.793079139372,-0.535744273087303,0.570574147248383,-0.93895  
6445312063,0.347753106850073,0.492624969294008,-0.379310752236579  
"Vmn1r65",99.0058015430288,0.165336239409608,0.341444708066016,0.48422  
5514421039,0.628225831299563,0.744493238842696,0.0487827068265559  
"Oas1g",444.983131960589,-0.693045357278258,0.422906115178775,-1.63876  
882457774,0.101261414185273,0.199232998461033,-1.11807641679299  
"Oas1e",0.866715771963128,-1.77027997726302,2.58969834113618,-0.683585  
400331353,0.494237006367888,NA,NA  
"Nck2",1387.45165091271,-0.328542427484508,0.11727987419219,-2.8013538  
5331431,0.00508886851884585,0.020154937716932,-1.28273016188753  
"Gm10184",96.5310701737906,1.39657255139472,0.85793243949403,1.6278351  
1510342,0.103559852551292,0.20260987407637,2.22959030318128  
"Zfp617",1361.30422192278,0.138517024166324,0.128636691473938,1.076808  
04426152,0.281566030806592,0.425480467229863,0.118367816657342  
"Fbxl12",1326.07836546083,-0.260840236066677,0.100290005422448,-2.6008  
5972642985,0.00929904685847108,0.0320040182574136,-0.897784394835398  
"Vsig10",1537.14754732191,-0.29301140146313,0.188391592455098,-1.55533  
162411676,0.11986710940166,0.226338262552156,-0.435334265327043  
"Olfr18",2.19591120478181,-0.853216399009908,1.38803251542852,-0.61469  
4821285579,0.538756280511546,0.669812533151446,-0.341932791690143  
"Suds3",6369.08618949084,0.404986764035685,0.142875847170174,2.8345362  
2188025,0.00458922550687918,0.0185798834994041,1.61414595114875  
"Rps23-

ps2",1.38350552818023,-2.41951353992352,1.83003061436916,-1.3221164285  
0443,0.186129384005615,0.314757218503165,-2.79684556149919  
"Gm10190",0.789860826406172,-2.38186391256006,2.51650832705805,-0.9464  
95541838562,0.343895895072187,NA,NA  
"Myo1h",61.9442344443464,-1.89540904900772,0.544345565443986,-3.481995  
94032105,0.000497691237406233,0.00344969205366041,-10.7459653319362  
"Tmem211",1.02563589573236,0.493251271994838,1.53611188414535,0.321103  
74061019,0.748131775697824,NA,NA  
"Cryba4",16.0097968085698,-1.61216947170617,0.566236562197101,-2.84716  
5971499,0.00441103583548597,0.0180376590288519,-6.47333366247117  
"Bub3",2643.2880266079,-0.141744262913152,0.138963554724114,-1.0200103  
4152126,0.307723556161091,0.452556486500901,-0.112380902925056  
"Serp1b7",1.20054789076256,-0.672171422365441,1.82134951765467,-0.369  
051308301873,0.712089481363584,NA,NA  
"Serp1b5",146.851577294404,-2.72671190559487,0.838967632841625,-3.250  
07997788826,0.00115372556900151,0.00655528847112793,-13.7084981737388  
"Vmn2r10",31.9349299468885,1.57856927123253,0.486382475327065,3.245530  
73210755,0.00117231910149223,0.00663894215535741,7.91621335217445  
"Gm3608",6.57876719745198,-1.00777275271205,0.74622394522215,-1.350496  
40146839,0.176856807184062,0.303285314553635,-1.20235481012859  
"Cntnap5b",0.142687882153157,0.893771666596844,4.78471990596623,0.1867  
9707154485,0.851819743073622,NA,NA  
"Rps12-  
ps3",1548.90791314781,1.94278005716424,1.25202555128399,1.551709591846  
47,0.120731726569289,0.227618178751499,2.87548099722747  
"Unc93a",1.21450389567894,-2.3348687383773,1.74792366568602,-1.3357955  
9806516,0.181616092173333,NA,NA  
"Rps15a-  
ps5",0.646113553533823,-0.83975146487758,2.1818233640139,-0.3848851739  
00003,0.700322490857139,NA,NA  
"Gm6990",0.281911496783019,-0.0519176572395917,4.7847199059585,-0.0108  
507202636747,0.991342547713731,NA,NA  
"Olfr1416",8.67934831752446,1.08413843600911,0.53279830699487,2.034800  
82758511,0.0418709177782882,0.101428643911177,2.48094211875718  
"Hes6",1924.7256270569,0.937357700046086,0.233967803442872,4.006353379  
622,6.16633730004515e-05,0.000679272568792544,6.83754457358425  
"Asb18",59.1461151123416,0.176147112103203,0.308703408225446,0.5706030  
688672,0.56826873778056,0.695266704173401,0.0640223870927727  
"Gm10197",0.139550614631636,0.4.78471990595951,0,1,NA,NA  
"Gm7027",8.68408167681253,-2.13718844806185,0.909886513975991,-2.34885  
165922818,0.018831407496588,0.0548802850690403,-6.20340554275489  
"Slc22a7",6645.92411665866,2.60859736695152,1.13205258992239,2.3043075  
8268073,NA,NA,NA  
"Rpl7a-ps11",0.506043198678339,0,4.78471990595113,0,1,NA,NA  
"Polr1c",2069.26441186891,-0.0775516727762736,0.188401000235794,-0.411  
630897284057,0.680609981537281,0.785099297167006,-0.0187632453632353  
"Jchain",2711.98306056815,-1.65528526844174,0.536392672355204,-3.08595  
801872848,0.0020289746690113,0.0100972302440996,-7.60685372798034  
"Xpo5",1879.22988770726,0.176471414885426,0.117386650516287,1.50333461  
351247,0.132752778570937,0.243936827497514,0.248973988201142

"Gm7337",0.169801833401073,-0.071398323185307,4.78471990596493,-0.0149  
221531434468,0.988094286236727,NA,NA  
"Col4a4",10014.6830342043,0.883836135625597,0.48314643560419,1.8293338  
6338726,0.0673496086593578,0.145650251734712,1.70275191499655  
"Gm5560",0.516487873550933,-0.0955548896817291,2.31317253793423,-0.041  
3090195887696,0.96704954261746,NA,NA  
"Eif1ax",3580.03887332043,-0.769240274122623,0.305955791097997,-2.5142  
2034327906,0.0119295873796374,0.0388383861626598,-2.49875871158857  
"Frat1",143.803925552442,-1.29435700825154,0.398507408189181,-3.248012  
4124495,0.00116214200817571,0.00659087983577955,-6.50034946652773  
"H2-  
M9",12.0588089897287,-4.69119094663456,1.72320943659474,-2.72235681108  
205,0.00648181160449619,0.0242623080561464,-17.4457474528942  
"H2-  
K2",1077.68019766276,-0.312806023276159,0.237333245665345,-1.318003393  
91656,0.187502511780199,0.316393247485099,-0.359967595035933  
"Lrrc66",376.510681246811,2.24318800015611,0.494584053675456,4.5355040  
9376538,5.74660634975639e-06,0.00011039145872665,20.438757650563  
"H2-  
T23",9332.9251744934,-0.409855989583619,0.195607511279715,-2.095297807  
85122,0.0361445272269661,0.0906542310099544,-0.983942367992348  
"Usp51",2.48819053966262,-0.614741046836458,1.09383228497472,-0.562006  
676234344,0.574111470421487,0.699889049035773,-0.21936017344273  
"Nipal1",344.000469925289,-1.16837597944022,0.373546401311093,-3.12779  
342898069,0.00176123917787801,0.00907454764381448,-5.49403304115354  
"Cnga1",2.8095198816221,-1.83367497978868,1.09539242004422,-1.67398910  
767947,0.0941327400630002,0.188458791020472,-3.06017600286763  
"Gm3695",4.88498358886091,-0.0185421345902883,0.826411929040305,-0.022  
4369154639634,0.982099433474671,0.988538266165357,-0.00021375235126497  
6  
"Cyp2c54",1.12362584925506,2.01046591949989,1.6721661250696,1.20231231  
177238,0.229242548613968,NA,NA  
"Cyp2c65",2.49312978712274,-0.967749571573098,1.56734114835161,-0.6174  
46669214863,0.53694014748446,0.668407009873715,-0.389865651846302  
"H2-  
Q10",1777.33632886038,-3.04042204421034,0.64651199678276,-4.7028083923  
2745,2.56607210703064e-06,5.81782255149808e-05,-29.6501939669295  
"Lgi1",19.6866098077003,-3.18081592160112,1.11638652865344,-2.84920665  
017137,0.00438284026290754,0.0179634410615897,-12.7850244396179  
"Foxd3",14.7987861568685,-0.976745944937676,0.530780652311649,-1.84020  
638409438,0.0657379430739053,0.142970142356053,-1.89988755008841  
"Rplp0",34486.1334696659,-0.331554470017956,0.212972344156101,-1.55679  
588977496,0.119518953384293,0.225855839609125,-0.493306090368407  
"Capn6",86.8090576874203,0.297557650501262,0.254933652239957,1.1671964  
3674655,0.243131049566493,0.38196512806764,0.286377208130424  
"Ppp1r3c",403.968566302431,-3.63501432265918,0.733277220380306,-4.9572  
1702738007,7.15100830811167e-07,2.09354894882224e-05,-39.1638797792258  
"Gm16223",1.13350431853907,-1.18357813498064,1.75913859020571,-0.67281  
6878425844,0.501063798466923,NA,NA  
"Rps28",8974.90762400106,-0.112826714189395,0.213954340192641,-0.52734

0151584717,0.597957396281789,0.720089760527597,-0.0370499695379638  
"Gm10203",0.155790875084046,0,4.78471990595981,0,1,NA,NA  
"Ifit1bl2",50.2848674070127,0.64253998902814,0.299026878964178,2.14877  
000774607,0.0316526360048538,0.0818953153957856,1.60783648166017  
"Bmpr2",3284.34502484953,-0.275514137962501,0.0831319389337605,-3.3141  
7914096808,0.000919126004035087,0.00551249425612923,-1.43287686893003  
"Tuba3b",0.194000364195305,-0.527784790998707,4.78471990596478,-0.1103  
06308701739,0.912166454177764,NA,NA  
"H2-  
Eb2",87.606698112915,-2.49356139554072,0.563796179469985,-4.4228064792  
5793,9.74270018793522e-06,0.000167663873137123,-21.6778990191697  
"Rps25-  
ps1",0.651332717646409,0.144556977741578,1.92949061518765,0.0749197620  
365308,0.940278552913418,NA,NA  
"Rps15a-  
ps2",0.0766974148937367,-0.0580667001376293,4.78471990596623,-0.012135  
861926886,0.990317220815659,NA,NA  
"Tmem128",1426.99505281417,0.0122260026532644,0.203065183140333,0.0602  
072815447408,0.951990546403649,0.970151658066082,0.000370482983498709  
"Lyar",1464.35259712311,0.213088379661672,0.215157369144467,0.99038383  
165298,0.321986545162211,0.467132656324739,0.162190515685167  
"Trmt2b",1541.1643789776,0.141813689035644,0.138108933924517,1.0268248  
7660901,0.304502933281809,0.449220204088488,0.113485281372074  
"B3galt4",153.001421111669,-0.0801223823473525,0.18857488918839,-0.424  
88362417813,0.670921512919963,0.777418889814788,-0.0201728899054364  
"Tspan6",871.035414047313,-1.55749156483959,0.423719625720544,-3.67575  
979562203,0.000237142574174719,0.00193060789614141,-9.73419823159619  
"Zfp563",441.302809559951,0.0386860792324296,0.199727902832419,0.19369  
3913989019,0.846415557532877,0.901924283570666,0.00399335912678934  
"Zfp763",418.574389317028,-0.0196791336892422,0.200554331746462,-0.098  
1237030278675,0.921834066053122,0.951892335475387,-0.00097024708952538  
3  
"Hmx1",0.677380951193167,0.585368346682949,4.64820577877529,0.12593425  
8193961,0.899783964428457,NA,NA  
"H4c11",8.4414323645097,-1.04868350188148,0.617293161438944,-1.6988419  
2372542,0.0893489720455921,0.181075382698779,-1.79203426110437  
"Olfr1427",0.0778527997966676,0,4.78471990596551,0,1,NA,NA  
"Olfr1423",7.04313707286846,0.455500899491205,0.703260809959993,0.6476  
98397294622,0.517180041054691,0.650789057146458,0.195669393053956  
"A630073D07Rik",0.292233105726524,1.36525818850029,3.89031770142596,0.  
350937453771414,0.725635272201351,NA,NA  
"Olfr1419",13.0018511409574,0.367127482101016,0.428300198969698,0.8571  
73270019868,0.391349132663609,0.535776252540026,0.22910173623555  
"Gm7666",179.995380496305,0.859788845810969,0.742638417072864,1.157748  
94759668,0.24696650268664,0.386247924070273,0.817896343934124  
"Dmrtc1c2",0.131375587390002,0,4.78471990595286,0,1,NA,NA  
"Hdac8",493.669028606163,0.0722235925929193,0.163110376218134,0.442789  
687986077,0.657917862806661,0.767179634762147,0.0191417293535075  
"S1pr3",1382.85068256009,-1.16817792897088,0.305786929643495,-3.820234  
99281939,0.000133324587290536,0.00124380995358414,-7.81461511536847

"Klra3",9.68719953933548,-0.673585331404103,0.599368623543132,-1.12382481322136,0.261087352761737,0.402584515946884,-0.612861766451476  
"Krt77",0.594989152960235,-1.08997427006919,2.60143509704339,-0.418989607431674,0.675223727588381,NA,NA  
"Krt74",0.121527413527064,0,4.78471990595379,0,1,NA,NA  
"Dgat2l6",0.547201855183754,-2.34448838348758,2.20863248317045,-1.06151132039954,0.288457591038277,NA,NA  
"Klra7",32.5306528835586,-3.60997581258242,0.682329703794018,-5.29066196665564,1.218744377099e-07,5.31612480194099e-06,-43.8423112954947  
"Pcna-ps2",0.280384076150672,1.35263986912979,3.95442504158261,0.342057278847406,0.732307786859838,NA,NA  
"Klri1",15.8506580602217,-1.36414676545724,0.817629824883541,-1.66841610217868,0.0952331539718842,0.190290637030518,-2.26339600598  
"Krt83",16.3513348706816,-0.983990554316946,0.613029308944137,-1.60512807456423,0.108465622037221,0.209496057303787,-1.53802678952148  
"Krt86",1.05739295155601,-1.06591795555948,2.16354585685957,-0.492671764816062,0.622244531213975,NA,NA  
"Krt81",0.186590730016243,-0.540742963096549,4.78471990596623,-0.113014549173982,0.910019020541414,NA,NA  
"Klk11",1.02569048931756,0.31722239975742,2.76694349987326,0.114647227083585,0.908724744680151,NA,NA  
"Syngap1",1432.42923362778,-0.436289607676166,0.296368076203245,-1.47212079406611,0.140988261186432,0.255601033622785,-0.595159020179575  
"Adgrf3",2.09098888304617,-4.52021467966006,1.81326791597313,-2.4928553799697,0.0126720448194866,0.0405247711809659,-14.4910934260414  
"Ankrd23",634.690891542581,0.0415997461193997,0.17197981165499,0.241887380379584,0.808867428819121,0.878121647011892,0.00540672502747895  
"Slc22a27",7.68624317817939,3.43392322320001,0.911804192085835,3.76607527471945,0.000165833812884694,0.00146803459911245,22.402334020321  
"Gm10220",0.0721532113593249,-0.544048378937457,4.78471990596623,-0.113705376621746,0.90947135024012,NA,NA  
"Tuba3a",0.743115044893841,-1.54168003934365,2.40935960113771,-0.639871291365418,0.522256279472286,NA,NA  
"Wfdc13",0.967462296002794,-1.49041600103811,2.17594266038212,-0.684951873123522,0.493374290916044,NA,NA  
"Prkag1",3541.40980119839,0.0975865288276987,0.109602309138097,0.890369277756198,0.373267633194203,0.518462851644006,0.0641033123737221  
"Lpar5",19.1661291513229,-1.27690772381462,0.491048470206311,-2.60037002717498,0.00931232874608197,0.0320345423237661,-4.39376351536249  
"Gm10221",12.1644063627039,-0.301609952163239,2.69074866282019,-0.112091462250183,0.910750886900779,0.945169934243248,-0.0170079489944447  
"BC003965",1814.53426092596,0.12560721915158,0.175498340079093,0.715717419862615,0.474165852271611,0.611824881714769,0.0617119796430864  
"Gbx1",34.4862524830092,-0.302734620630497,0.632429712157483,-0.478685006113554,0.63216273412698,0.747477804124188,-0.0881111134514923  
"Gm10222",2.4463557965906,-1.0095041469909,2.24144078358673,-0.450381805481162,0.652435161890612,0.763269225034636,-0.272711951949615  
"Khdc1a",3.00024671075444,-1.78052638195939,1.24367719733495,-1.43166280267488,0.152240346734478,0.271113020214045,-2.32397774737925

"Xlr5c",3.62478913530984,0.414637085343175,1.00690132343357,0.41179515  
3798435,0.680489573756327,0.785053293243054,0.100343698039037  
"Clec4b2",0.366082714542414,-0.0521221765649953,2.64767182883745,-0.01  
96860411465274,0.98429382617474,NA,NA  
"Xlr4b",167.14745992754,-1.18184105185582,0.486184992258254,-2.4308464  
2815968,0.0150635978478787,0.0462830873967723,-3.63177234088129  
"Gm14685",9.75390449369608,-1.54983492970704,1.31172314282288,-1.18152  
594790066,0.237393851704974,0.37551833816259,-1.51798267933079  
"Pi15",250.127546259169,-0.984990552338295,0.269331499830358,-3.657168  
03626276,0.00025501721039251,0.00203751723379642,-6.10302436782971  
"Nnat",180.299692697541,-3.08190577083807,0.723224020605447,-4.2613432  
1182813,2.03201889186859e-05,0.000291607969668831,-25.0870218659546  
"Blcap",2336.97980931078,-0.574341176970925,0.257444318995276,-2.23093  
358289046,0.0256855288049586,0.0699464302568552,-1.52776224074332  
"4930444P10Rik",11.6520204976137,1.13559070150101,0.638795149839361,1.  
77770714412371,0.075451965731612,0.158975840483572,2.08835474652268  
"Xkr9",19.6496909540681,0.833530916384621,0.441728104100861,1.88697732  
529669,0.0591633755096667,0.132148234297721,1.68692570751262  
"Myl9",5087.87450754636,-1.15574374954473,0.206366250507663,-5.6004494  
2766364,2.13796775788138e-08,1.43251186746293e-06,-15.5517816292572  
"Pex26",1091.82307290495,0.165674566493917,0.162217127454464,1.0213136  
4975886,0.307105861472036,0.451750289474293,0.131649269818058  
"Romo1",5651.2276270219,0.800132997725765,0.262594448861216,3.04702936  
865449,0.002311151276782,0.0111679870123161,3.59636090211623  
"Arfgef1",4969.90745101558,0.0278739480571242,0.164074231201216,0.1698  
8620244053,0.865099632243804,0.915131978596445,0.00247205641894229  
"Zic3",0.49005449101698,0.334525117906097,4.57827474091172,0.073067943  
0215844,0.941752051210479,NA,NA  
"Tcea1-ps1",0.091991025955798,0,4.78471990596463,0,1,NA,NA  
"Rpl31-  
ps8",3814.91444507026,-0.336278356947722,0.248008486043861,-1.35591472  
01449,0.175126303385382,0.301365979497278,-0.403342307331883  
"Ccdc87",8.38551748528337,1.20717006941169,0.715926590093759,1.6861645  
9580527,0.0917641010072721,0.18489424554011,2.03766838682285  
"Htatsf1",3735.39726805526,0.0128602625386133,0.106227592689598,0.1210  
63296390343,0.903640900533234,0.94099499458433,0.000782128485329909  
"Map7d3",55.6192517380731,-0.611138673743803,0.322162323746697,-1.8969  
8989824868,0.0578292713468656,0.1300374965657,-1.24668160284993  
"Vxn",0.276102012833439,0.888381297559323,4.78471990596005,0.185670491  
694345,0.85270317013038,NA,NA  
"Casp16",1.83046503451851,-2.90715786919418,1.61115309007138,-1.804395  
80019387,0.0711692809828795,0.152072179792239,-5.47534114187394  
"Sptbn2",2066.85259724652,1.04229929026968,0.414297461833972,2.5158234  
9951103,0.0118754637322656,0.0387009513374085,3.38944378231917  
"Zfp991",1179.12867260814,0.0283420761473961,0.281117048349178,0.10081  
948538458,0.919693758553568,0.950800998695454,0.00142987171776015  
"Rex2",8.92953430424117,-0.343506150297388,1.04648698995619,-0.3282469  
38179106,0.742724960549723,0.832422330332729,-0.0630043036617007  
"Rtl8b",1947.65726032044,-0.253204528888695,0.1406365656219,-1.8004174  
6446961,0.0717947452161359,0.152939357830681,-0.475445635637061

"Rtl8a",2224.85948266376,-0.127015524960296,0.172113407800927,-0.73797  
5771807432,0.46052917215411,0.599946401995112,-0.0648941315705003  
"Zfp760",907.612669901374,-0.279496672473598,0.114070665716401,-2.4502  
0637618153,0.0142774356253435,0.0446338688188148,-0.869028471614191  
"Gm10226",12.5298003539326,-1.09743801864041,0.504578834890537,-2.1749  
584856814,0.0296332274955705,0.0779216007698764,-2.80071897385972  
"Zfp948",659.671365211446,-0.0782394786700864,0.207324068506275,-0.377  
377692970164,0.705892941945551,0.804612885314632,-0.017008793619949  
"Gm7168",0.229207171298064,-0.0623378334633035,4.07339967947323,-0.015  
3036378378085,0.987789940248995,NA,NA  
"Zfp160",1099.973727074,0.100647377590044,0.194325171524864,0.51793278  
6577603,0.604505165548147,0.725586502318834,0.0322851607801508  
"Vmn1r-  
ps144",409.3514854891,0.202130263023553,0.229380821374718,0.8811994909  
25841,0.37820985478353,0.523177036858622,0.130947133652914  
"Vmn1r227",815.872141422954,0.810994535923246,0.406209147486404,1.9964  
9500987761,0.0458800683844158,0.108749036391848,1.79936368980653  
"Olfr1321",0.160515808015246,-0.0754153850347437,4.78471990596502,-0.0  
157617136461269,0.987424492724383,NA,NA  
"Gtf2f2",639.727057143402,-0.135361784941181,0.121106466408629,-1.1177  
0897917584,0.263691306560866,0.405605324654762,-0.12214704993486  
"Bpifb6",0.24255920110299,-0.544119768261999,4.78471990596051,-0.11372  
0296894321,0.909459522303938,NA,NA  
"Mkrn2os",375.054199256854,1.13351649314043,0.391711242834134,2.893755  
32072845,0.00380664666733361,0.0161754670460473,4.67491623829579  
"Gm14648",1.69776600141507,-1.17061808246883,4.16422150496866,-0.28111  
330799096,0.778623494279636,0.856940320636711,-0.180728214295254  
"Lrch1",1128.31367532148,-0.529076009661822,0.183691776657021,-2.88023  
785980188,0.00397375250383439,0.0167163379330665,-2.16464503561623  
"Afdn",7790.98113768933,0.378659116524129,0.233207436512248,1.62370086  
557785,0.104439666212213,0.203901533173698,0.602112708169877  
"Mas1",56.159634156698,0.861430930026402,0.531385129413611,1.621104698  
53946,0.104995186501288,0.204596856526296,1.36684433544296  
"Tcp1",7946.59942911346,0.0596341288757984,0.130441655596217,0.4571708  
98385377,0.647548213912491,0.759802178559905,0.0163813264943679  
"Tm9sf4",2489.63664923005,-0.0710824425330216,0.0780047569614566,-0.91  
1257791215792,0.362159560427267,0.506955783560259,-0.0482885416774737  
"Rhox9",0.204581788221523,2.58336476831812,4.72815898560202,0.54637857  
4871291,0.584805734458048,NA,NA  
"Tcf15",193.822293745185,-2.28733984542207,0.606059886905531,-3.774115  
22333371,0.000160576536402464,0.00143504545093679,-14.9742046956156  
"Cyp2d40",3.24262738958998,1.00847516920059,0.982998646581207,1.025917  
1492331,0.304930638411073,0.449651310318136,0.806056920040437  
"Cyp2d11",0.962521187033484,-1.08764450525286,1.8438557019854,-0.58987  
5066732023,0.555274411154698,NA,NA  
"Cyp2d9",3446.30887799137,2.36756609743354,0.937898952944666,2.5243296  
0928278,0.0115919184490884,0.0380375674722863,7.74000207811978  
"1500009C09Rik",0.168186726483637,-0.969206989771979,4.7821915227276,-  
0.202670048902428,0.839392934832329,NA,NA  
"Cenpm",78.5457040038902,-0.923055307979395,0.355731673045617,-2.59480

776641732,0.00946438369077709,0.0324203361213583,-3.16512840096489  
"Tnfrsf13c",49.4268699441028,-1.72668899854315,0.768553761904547,-2.24  
667301642536,0.0246609319661261,0.0676856491378839,-4.64976816771401  
"Gm4907",0.726654287904918,0.272194414783795,2.74787601189572,0.099056  
2942452456,0.921093573494499,NA,NA  
"Ccdc134",992.492055011112,0.0155895236080879,0.178816026988828,0.0871  
819146784977,0.930526914610631,0.956679177759194,0.000690416056619636  
"Ninl",2003.59263868803,1.29288037264135,0.352192448617242,3.670948589  
94672,0.000241651947430492,0.00195669836835537,8.06304421891749  
"Mei1",1.20759766208943,-3.14917081079055,1.91443732655048,-1.64495894  
805022,0.099978277163774,NA,NA  
"Agtr2",4.15487805874278,-2.86020495820487,1.59086955422072,-1.7978877  
9703307,NA,NA,NA  
"Cst7",37.7627476774829,-1.35958874956216,0.779312505202762,-1.7446001  
9630819,0.0810544866482406,0.16793118485468,-2.42577960309582  
"Zfp442",139.723538342528,0.177614548612178,0.240592059915931,0.738239  
444286904,0.460368957428527,0.59977775838176,0.0907958636797791  
"Zfp120",920.231154492363,0.0723433433202526,0.113985081701344,0.63467  
3785731029,0.525641194012733,0.65829224746999,0.0302472076898217  
"Gm10232",1.89977751447311,-3.07807819165283,2.29327980856939,-1.34221  
65843657,0.179525780692773,0.306890555141827,-3.63602324282965  
"Insm1",5.48424188152047,-2.16682517943532,1.15330069580137,-1.8788033  
2277933,0.0602713531856838,0.134035265255713,-4.35456529245109  
"Ndufaf2",875.802120317486,0.61682938287948,0.185212627452603,3.330385  
14362273,0.000867259346044131,0.00527937019330892,3.23462149857035  
"Col8a1",866.143053175309,-1.30095969616771,0.372737525253261,-3.49028  
366619046,0.000482508089975597,0.00336599024627699,-7.40770754694466  
"MacroD2",2924.29347981457,1.66337719129972,0.35767116786128,4.6505766  
7702434,3.31008147173411e-06,7.15520715475296e-05,15.8770768442462  
"Pick1",2527.29689292616,0.384243352463637,0.153989333535934,2.4952595  
3285572,0.0125865033315932,0.040330590297355,1.2336690112515  
"Ssxb9",0.906403882010084,-1.50787674525992,2.11352118417017,-0.713442  
92953087,0.475571716364023,NA,NA  
"Ssxb10",1.78763408362525,1.40487904823188,1.46892062442507,0.95640228  
9457771,0.338869028495441,0.483456720652421,1.02105693343624  
"Lgals1",8089.82852465207,-1.31731349106593,0.378231632076437,-3.48282  
211044611,0.000496157935730075,0.00344151100350943,-7.47159748830771  
"Gm6723",13.8919785504948,0.44671779430189,0.389669698098816,1.1464011  
6098688,0.251629202551599,0.391624057419466,0.418776908080717  
"Il2rb",573.217979616022,-1.38132532005596,0.37795769554774,-3.6547088  
10874,0.000257474037151047,0.00205242386605524,-8.54865471166764  
"Vmn1r43",7.08129485404246,-0.0824334259004978,0.65592370864868,-0.125  
675325977049,0.89998893400037,0.938696064787591,-0.00521502966429084  
"Vmn1r42",1.8155118000112,0.922044343433641,1.9983078388605,0.46141256  
3921793,0.644502639221613,0.75738382711807,0.256222400162507  
"Gm11808",14681.8623322768,0.0019073218789528,0.233430539780346,0.0081  
7083266288787,0.993480691310357,0.99595846332689,7.72413053476654e-06  
"Gm7079",0.121527413527064,0,4.78471990595379,0,1,NA,NA  
"Phf11d",859.916444988072,-0.910353177731073,0.219586546657719,-4.1457  
6025529509,3.38688060651848e-05,0.000427703355349076,-7.06168306303355



"Apol9b",236.685802772567,-0.490603883044639,0.375368760647363,-1.3069  
9177576349,0.191215504648367,0.321032319802051,-0.557430743381015  
"Amn1",1356.42462974323,0.272185981692252,0.136050911240131,2.00061858  
616913,0.0454335090724565,0.107953029477791,0.605902070197829  
"Apol7b",11.3490150827779,-1.01724285739358,0.77989860519753,-1.304327  
0633058,0.192122091677214,0.322070032114377,-1.15252218666137  
"Olfr461",5.58224031642837,0.731713908265617,0.784146595597659,0.93313  
4075150733,0.350750747505054,0.495702379400227,0.513501874749088  
"Gm5879",2.05478334030852,0.392369577843484,1.20662435447529,0.3251795  
60969586,0.745045176795567,0.834239283593792,0.0711111031833217  
"Efcc1",136.022359193966,-0.532626467229722,0.437648574908707,-1.21701  
862582513,0.223597129285801,0.359655138838007,-0.544668967540417  
"Ap5s1",869.289304895077,0.162270502701693,0.196620122586502,0.8252995  
70395208,0.409201535680835,0.552811777569486,0.0961838447855552  
"Cenpb",13300.7566116963,0.37987224930532,0.155769472005562,2.43868226  
819024,0.0147409227578822,0.045643721126439,1.17262355332596  
"Shroom4",1876.33569867226,0.571848016163034,0.188957275894288,3.02633  
499269408,0.00247537887502168,0.0117404371941554,2.54170215599927  
"Usf3",1807.82706967389,0.138609400083989,0.20239372839134,0.684850272  
711908,0.493438408041352,0.629650659685228,0.0641193392715476  
"Cma2",0.0832382239760744,-0.0615945951554247,4.78471990596623,-0.0128  
731872222281,0.989728966351994,NA,NA  
"Ddrgk1",7440.30844503326,0.608227970943174,0.254147083693306,2.393212  
47406938,0.0167015660425728,0.0500830048066946,1.82107928251679  
"Nat8f4",460.214316739793,0.81516543278332,0.2441888077168,3.338258785  
91747,0.000843051922562918,0.00517075381759414,4.29163144796967  
"Noto",0.224566721019342,0.889442070195366,4.78471990596216,0.18589219  
1742937,0.852529305566485,NA,NA  
"Spr-  
ps1",108.154683076784,1.23514333145595,0.525207899630451,2.35172268415  
046,0.0186867006906798,0.0545357416654505,3.59290717935716  
"Slc4a5",56.9767012487318,0.675509360373641,0.607093282719794,1.112694  
50610183,0.265839655872366,0.407616733903639,0.606220962758442  
"Tlx2",5.56934623079868,1.10714394585736,1.07799815286097,1.0270369600  
5326,0.304403060729713,0.449129843216643,0.88620589816759  
"Aup1",7326.0893348694,0.710418508128544,0.180575779081731,3.934184926  
35714,8.34794944257906e-05,0.000858788192022722,5.01554631389278  
"Htra2",2360.90714269769,-0.211489254454437,0.167282540442911,-1.26426  
376533068,0.206135370527265,0.339203937424306,-0.228652404167096  
"Dok1",878.641569654392,-0.971317132481566,0.291441875852862,-3.332798  
79440505,0.000859770952438975,0.00524853288373674,-5.09922718230074  
"Gm10238",9.97333027710254,-4.68505003705686,1.56480795729679,-2.99400  
959409121,0.00275337286433213,0.0126945528750882,-20.4576564961421  
"Gml",1.48757030632606,2.03786414868237,1.41411600366335,1.44108697122  
666,0.149560113855409,0.267387043824754,2.68806114660606  
"D430041D05Rik",10.5960242781372,1.03791711697758,0.724009709112353,1.  
4335679534603,0.151695594087625,0.270460926620383,1.3572091100359  
"Chrac1",1373.34818312833,0.334934326297617,0.200987193809513,1.666446  
10509391,0.0956245942801418,0.190746297393848,0.554922882714245  
"Rnase13",1.69126039283503,-3.48792561229843,1.90369684203088,-1.83218

542747461,0.0669237992161578,0.144954480906092,-6.73635459347423  
"Cep152",338.225247843313,0.0111401377489109,0.223647445799504,0.04981  
11557191574,0.960272876741658,0.975888697524698,0.000271894428818681  
"Rpl34-  
ps1",0.941951737354675,0.509299028507473,1.60077303521446,0.3181581756  
46207,0.750364956605592,NA,NA  
"Gm10240",283.553484670301,0.139853355360589,0.665968221799947,0.21000  
0043219179,0.833667639303248,0.893712977300128,0.0157154068288891  
"Gm7247",2.74849398557194,1.05996902365097,1.37772890284462,0.76935964  
7941215,0.44167983644525,0.583420481697862,0.571161250060405  
"Rnase12",41.0573059463511,-2.30956675823676,0.943952146619701,-2.4466  
9898416709,0.0144171191001313,0.0449839955535863,-7.1630023737728  
"Pnp2",41.1989066183963,-1.56394923507381,0.548998107147575,-2.8487333  
8307049,0.00438936469269427,0.0179722454385033,-6.28539723060681  
"Gmnc",6.71650489815254,-0.804966448158752,0.778949995121099,-1.033399  
38789474,0.301417032812538,0.446108190813638,-0.649763906907194  
"Olfr742",2.38927002942248,0.163605682448843,1.08003813739987,0.151481  
393835513,0.879595987033589,0.924764625844561,0.0127965873586214  
"DuoX2",5.22628240271056,-1.72457566955037,0.788766822650069,-2.186420  
14347942,0.0287848812175487,0.0762283466871084,-4.43909551006655  
"Uty",1177.81090361115,0.372946129981319,0.261525298028984,1.426042271  
21457,0.153856140703508,0.273313322835003,0.483762015061901  
"Gm5518",4.3194514455048,0.747021598699309,0.930508135857346,0.8028103  
8919775,0.422084336368196,0.565297129741644,0.426103953142664  
"Mfap1a",1866.64182136496,-0.187400105137727,0.150462034643321,-1.2454  
9761394607,0.212948892046927,0.34733792012138,-0.198167579158492  
"Gm7551",1.51845619834391,0.919329181567278,1.46357019199327,0.6281415  
03972023,0.529911246334916,0.662193775622521,0.378944779798447  
"Aard",120.80943429782,-0.764291899461132,0.366740073033426,-2.0840152  
3493036,0.037158781495034,0.0926261725377362,-1.81839070425462  
"Gng5",4230.25223205996,0.282240283834248,0.144238153107511,1.95676579  
153003,0.0503750107091339,0.117104126431753,0.605318414034504  
"Clca4a",1.06338828040364,-2.63942774787005,2.28420222789818,-1.155514  
04145978,0.247879985918608,NA,NA  
"Zfp467",2121.70414743211,0.56691695723066,0.174642120001446,3.2461639  
6792462,0.00116971447524843,0.00662804209194821,2.84390820538261  
"Myadm",4553.72461506435,-1.59679706725555,0.208627416127918,-7.653821  
80775557,1.95092568290044e-14,2.71708206894233e-11,-38.8482802212222  
"Rpl7a-  
ps3",0.534483076537568,0.680484252002244,3.00937477518061,0.2261214713  
48282,0.821106945319672,NA,NA  
"Zfyve19",1240.49763988868,0.455964736674589,0.148393012484364,3.07268  
333623616,0.00212143474462878,0.0104559491028241,2.07946556034801  
"Mgam",2412.68719018314,2.26756534797045,0.604376152983081,3.751910688  
03459,0.000175491986123084,0.00152892884067376,14.7010522103214  
"Gml2",0.609292605655153,2.80400814470394,2.57595559587946,1.088531242  
22687,0.276360652056922,NA,NA  
"Gm8225",0.246232365199318,-0.0830035754874935,4.02928751340227,-0.020  
6000627186335,0.983564690435192,NA,NA  
"Gm4841",264.245684680549,-1.22204511095785,0.627159815336007,-1.94853

860383757,0.0513505503531038,0.118770599889683,-2.60364211601658  
"Actc1",4.24987674999271,-3.54503844455386,1.3258859819621,-2.67371289  
29501,0.00750166445453135,0.0271670604633084,-12.7825225555318  
"Gjd2",0.100946291087227,0.902725258480159,4.78471990596623,0.18866836  
015929,0.850352751122576,NA,NA  
"Efcab1",16.3743853182803,-2.29217641281418,0.83205073263955,-2.754851  
74508844,0.00587187356665784,0.0224445776911771,-8.70272044890973  
"Gm7676",0.0778527997966676,0,4.78471990596551,0,1,NA,NA  
"Olfr1278",0.14728986473751,0,4.7847199059615,0,1,NA,NA  
"Clec16a",1169.10093926903,-0.225152753191942,0.232050777415026,-0.970  
273643122742,0.331910111363398,0.476728055349063,-0.166795200629032  
"Gm10247",0.679867827336299,-1.64538323104324,2.38962691037845,-0.6885  
52352627574,0.491105014180884,NA,NA  
"Cd59b",218.438648953012,-0.392647804739593,0.214498440548159,-1.83053  
92045563,0.0671693499913115,0.145389430076664,-0.757158236918133  
"Gpr88",73.6043099096693,-1.51541365348583,0.493973293933794,-3.067804  
82284318,0.00215637408652762,0.0105933439000039,-6.8913881561165  
"Myoz1",13.486754143407,0.0341482339707428,0.628421821141918,0.0543396  
69346127,0.956664544658012,0.973591799767311,0.000913914647199747  
"Flnc",351.080760130206,-1.82509401200897,0.304814077823594,-5.9875646  
9858722,2.13006222630034e-09,2.67948085731639e-07,-27.6181851020587  
"Gm10250",1.82785418784562,0.521782194855919,1.28784274981802,0.405159  
865154073,0.685360004352256,0.788665566859083,0.123877833247084  
"Tmem167b",1947.63519727315,-0.267633894371032,0.17846563840018,-1.499  
63823159564,0.133708138714304,0.245322413536417,-0.376074320242342  
"Trp53i11",2072.90568858946,-1.81501391716199,0.314112864735841,-5.778  
22216447061,7.54940813536928e-09,6.42787597482228e-07,-25.877472891750  
4  
"Sars",6010.56501632034,0.310882037828442,0.120255639572058,2.58517637  
039515,0.0097329196181546,0.0330902295928123,1.05964677890343  
"Celsr2",4057.55240041077,0.552411319691877,0.272517935756422,2.027064  
08353843,0.0426558593885557,0.102946397618277,1.25593300898774  
"Cry2",1056.38126122594,-0.0546211365065309,0.30223090666515,-0.180726  
508447553,0.856582250662994,0.908883365445529,-0.00521842166196091  
"Psrc1",149.370488084103,-0.668195983308071,0.478549884151021,-1.39629  
327148098,0.162626199161418,0.284741884990063,-0.839369202198818  
"Mybphl",0.369280280622004,0.411698026506507,3.90019291456023,0.105558  
375066411,0.915932752053099,NA,NA  
"Sort1",3327.34835361616,-1.11007420529638,0.36871831155486,-3.0106294  
4396569,0.00260706798397193,0.0122135058989632,-4.89011320764381  
"Ptprz1",48.283501668064,-1.46630782389658,0.407398215257174,-3.599200  
4112511,0.000319197129733335,0.00242544268688689,-8.82972626430729  
"Psm5",3296.00511505826,-0.105230805144801,0.271897492995257,-0.38702  
3815429723,0.698738577049631,0.799202485793025,-0.0235865317190175  
"Il3ra",771.282166899305,-0.875986278098788,0.240549577555449,-3.64160  
389305553,0.000270944740249915,0.00213449719005771,-5.38689878818676  
"Gstm6",266.407645423907,-1.83189995098211,0.342139832453275,-5.354243  
43271193,8.59151308135826e-08,4.06595441893989e-06,-22.739121386651  
"Col28a1",55.6585256131701,-3.28380390393415,0.622056541657962,-5.2789  
4762617858,1.29927932063316e-07,5.58003264178532e-06,-39.7219294800849

"Rap1a",3994.35821815957,-0.213889293136363,0.154069367304909,-1.38826  
618735358,0.16505600434799,0.287781630401243,-0.26641051794211  
"Olfr1259",1.89061873037914,-2.7492324150052,1.70456450375469,-1.61286  
499217213,0.106773842332675,0.207028279415523,-4.32976579914737  
"Olfr152",3.83915177230262,0.512974794074528,0.800818235963448,0.64056  
332765372,0.521806432291035,0.655130831732814,0.216947464159065  
"Csde1",12333.3381422555,-0.500486579641846,0.256629385634234,-1.95023  
098545376,0.0511485942224286,0.118417334408731,-1.06780821809244  
"H2bc21",635.695213131713,-0.47996455177792,0.143449671020101,-3.34587  
418963592,0.000820236030884151,0.00505147256164851,-2.53808877840664  
"H2ac20",1.59764258690359,3.31378655582827,1.516204021562,2.1855809038  
2479,0.028846280977306,0.0763568811424807,8.52417618216625  
"Sf3b4",1489.04796256605,-0.0122345397884259,0.181824507615887,-0.0672  
876277727747,0.946352726173284,0.967034508407667,-0.000410115208680672  
"Sp9",4.0702598473129,0.963799957337024,1.92416407702613,0.50089281306  
333,0.616446560787132,0.735271000319783,0.296384042426712  
"Gm128",82.8576853249071,0.972485967090429,0.396667932633136,2.4516374  
7075528,0.0142207854657981,0.0444781641020423,3.02711240866394  
"Selenbp1",15836.9697158815,1.74658260713224,0.438182788935585,3.98596  
807367758,6.72055488100682e-05,0.000728390100443975,12.6184896030776  
"Cgn",2413.26166019511,-0.194244088786326,0.193935675647794,-1.0015902  
8573522,0.316541514625643,0.461719405451449,-0.150111427770497  
"Selenbp2",810.961735033152,1.63172873044846,0.614566801123783,2.65508  
766087709,0.00792878013287018,0.0282830872723569,5.81791455299322  
"Ssb",6579.43347224504,0.087606689265144,0.102331891562172,0.856103487  
659253,0.391940539687511,0.536435255006816,0.054562269972899  
"Sprr2a2",8489.31550734742,-2.46406719287172,0.817495593683347,-3.0141  
6571772516,0.00257687009248948,0.0121069429068337,-10.8763339371026  
"Clk2",3222.73135808024,0.122307375766592,0.192956741160327,0.63385904  
5458106,0.526172815138899,0.65870417653793,0.051060974082363  
"Dap3",3970.11436353968,0.629324158136676,0.173734103043632,3.62234096  
306715,0.000291948953870008,0.00226338795330315,3.83314579098453  
"Msto1",1002.82062642848,0.119378683178959,0.1072891085827,1.112682216  
82483,0.265844935724257,0.407616733903639,0.107133763786121  
"Syt11",2953.24609993906,0.307098772840985,0.291821375636357,1.0523518  
7851238,0.292638138046633,0.436561470209123,0.254531474645025  
"Olfr366",35.571982984368,0.438489784294948,0.526292057139912,0.833168  
158907589,0.404749897600825,0.548581297864577,0.263277944957082  
"Olfr338",1895.59038807132,0.765276965932561,0.354068126636625,2.16138  
338461048,0.0306657365072344,0.0799679725047555,1.9331883888338  
"Zfp619",112.276105714809,-0.299519496927863,0.215951705889483,-1.3869  
7444270779,0.165449556134709,0.288210075577978,-0.372621913338152  
"Zfp114",41.0624646466073,-0.334854763333871,0.357040839313654,-0.9378  
6123732391,0.348315725830454,0.493206973292825,-0.236684176482029  
"Gm6361",109.903024369373,-0.720987366187499,1.57858632950143,-0.45672  
9766825748,0.647865292606711,0.759961344919123,-0.197902170322228  
"Zbtb34",495.084458787388,-0.567000200465492,0.181093100902825,-3.1309  
873078475,0.00174219689828752,0.00900238677426743,-2.67072150523498  
"Vmn2r5",0.512552707854445,-0.439143041380371,2.41429590558837,-0.1818  
92799620745,0.855666855309137,NA,NA

"Gm5537",0.36186793495761,-2.14264896534635,4.74574922333033,-0.451488  
029500798,0.651637850610099,NA,NA  
"Gm10254",0.128034173648043,-0.0639428131350701,4.78471990596074,-0.01  
33639616094165,0.989337418743081,NA,NA  
"Gm5641",10775.1561064886,-0.575096290529342,0.238387044030393,-2.4124  
4776060909,0.0158458080113522,0.0480984316631885,-1.74513297635116  
"Urm1",1458.96701825525,-0.231935310241198,0.151370953423951,-1.532231  
28344582,0.12546537132424,0.234232459793186,-0.336640474022091  
"Slc25a31",7.24778722294782,-0.115902574032666,0.609416668705165,-0.19  
0186091035097,0.849163309951708,0.903864298364363,-0.0117149734740702  
"Ddx3y",4584.16417681097,0.121427616849798,0.244310463639312,0.4970217  
60922478,0.61917370594525,0.73726100265774,0.0370127535115473  
"Eif2s3y",3819.79084754695,0.519541890470334,0.266660860317893,1.94832  
45117074,0.0513761460007249,0.118770599889683,1.10691588627458  
"Uba1y",16.1762960437299,1.18805063368727,0.479236149753484,2.47905053  
552074,0.0131732640448526,0.0418394367725259,3.7707728209478  
"Slc7a14",124.007135406354,0.362810471877374,0.381682624626664,0.95055  
5378915272,0.341830128977242,0.486329899419402,0.261538488257465  
"Dytn",0.397288227554315,-0.57109890013465,3.80004105810763,-0.1502875  
60424163,0.880537746868116,NA,NA  
"Cdk7",911.822760255865,0.0365172229812704,0.135530050899727,0.2694400  
44763857,0.787591073890683,0.862818898680781,0.00538813307845442  
"Pde7a",2171.82201676419,0.0626555017133659,0.195350806013455,0.320733  
264387199,0.748412536639763,0.836345004550785,0.0111974194784313  
"Zbtb10",919.884166783544,-0.0790141678549012,0.141923343666801,-0.556  
738347712592,0.577706212315827,0.702794068142569,-0.0278676145590768  
"Gm10260",3.45280099610534,0.427842250904438,0.809050551447134,0.52882  
0170926482,0.596930203723127,0.719305337063229,0.140960905028542  
"Nxph2",0.0939487503994499,0,4.78471990596623,0,1,NA,NA  
"Fgfr1op",1260.88953109578,0.0687411284536173,0.0941149480345339,0.730  
395435466786,0.465148507656863,0.603906352529865,0.0346686352837618  
"A130006I12Rik",13.1297098387496,-0.850737272909202,0.424708779769717,  
-2.00310733715108,0.0451657686294917,0.107460909913097,-1.897678489007  
93  
"Adgrv1",62.8655036500797,0.340259429012923,0.451818504844453,0.753088  
741086565,0.451396589635796,0.591993086567323,0.178384517907019  
"Nr2f1",555.930487787125,-0.890666148454533,0.300936036012343,-2.95965  
268984271,0.00307986037594483,0.0137858396717567,-3.81571471416229  
"Zfp72",279.479141007446,-0.0441164483696341,0.101410213064781,-0.4350  
29638893003,0.663540914013177,0.771830610581208,-0.0114257264356177  
"Zdhhc11",0.114222479614858,0,4.78471990596623,0,1,NA,NA  
"Zfp874a",697.254595228603,-0.0815453811174099,0.1868294173775,-0.4364  
69707297981,0.662495973138595,0.771092793950353,-0.0211974410886692  
"Zfp825",831.782492972209,-0.060386574298542,0.101739496391933,-0.5935  
41116676196,0.552819074643879,0.682552325063726,-0.0230626042299636  
"Gprin1",7.11072510544294,-0.764901184492116,0.781501944499926,-0.9787  
57877539982,0.327699627050827,0.472420504860408,-0.573588528916515  
"Gm7251",0.321268139369836,0.84028689807382,3.86654618833521,0.2173223  
48458901,0.827957141710921,NA,NA  
"Fam8a1",4712.42293104809,0.534787260592018,0.130344150376904,4.102886

54339781,4.08027365799585e-05,0.000495992367728199,4.06916953664393  
"Serpnb6e",1.69505870001045,-4.30552353988296,3.08749951513866,-1.394  
50177037181,0.163166135266796,0.285467826054092,-5.39751603606935  
"Dusp22",1943.8209072028,0.135394481247731,0.150139038104006,0.9017939  
83480421,0.36716631643128,0.512052702795014,0.090623279988374  
"H3c1",2.28304109415339,-0.196650351310888,1.60484422468142,-0.1225354  
76207932,0.902474951723305,0.940283029213477,-0.0121086183714268  
"H4c2",7.78828786077033,1.05893512792677,0.616151370600556,1.718628211  
26996,0.0856820913770556,0.175210216850533,1.84442015309348  
"H3c2",2.30525487267328,-0.647553100033681,1.41910459587305,-0.4563110  
44243571,0.648166323172431,0.760194361441577,-0.177546846956578  
"H2bc7",0.927584211050442,-2.67823615515185,2.54377326146794,-1.052859  
62224727,0.292405334237708,NA,NA  
"H2ac6",58.6175107592788,0.00449975775703307,0.263822081759782,0.01705  
60315763494,0.986391915523787,0.991182975731778,3.98504136856652e-05  
"H2ac8",9.21853209686519,-1.57279722838646,0.629902827883971,-2.496888  
66085892,0.0125288287551282,0.0402251116528057,-5.05381241507281  
"H3c6",5.89645253223453,-4.01741014549336,1.40240912123382,-2.86464918  
451107,0.00417471456820842,0.0173188477980697,-16.2944544617026  
"H4c6",1.81896702699981,-0.285780005315649,1.30515647351454,-0.2189622  
55572389,0.826679449985063,0.889363516942602,-0.0335074831721139  
"Vmn1r203",255.455263014149,0.0675367292520546,0.273147274153527,0.247  
253901622662,0.804711732478276,0.875649330474424,0.00896817363288224  
"Vmn1r197",342.079915402192,0.445834854903747,0.319220514055936,1.3966  
3597818035,0.162523065389167,0.284663558116959,0.560167996963489  
"Vmn1r188",0.274369800683699,0.904786324268541,3.97776361436557,0.2274  
61059023451,0.820065246043701,NA,NA  
"H2bc11",2.37571591548896,-2.02306617161713,1.60104516934639,-1.263590  
94068721,0.206376886888212,0.339400855309241,-2.18607150387573  
"H2ac11",5.17621517548956,0.344565135577852,0.935914899217444,0.368158  
617696926,0.712754964876207,0.809483056168643,0.0728270931738738  
"H2ac12",5.04542970207984,0.254783685263107,1.32665979699538,0.1920489  
9842457,0.847703824519301,0.902791705035749,0.0260550515560875  
"Hist1h2br",10.8374077432637,-0.62767111190632,1.00802959433522,-0.622  
671313851911,0.533500537273245,0.66569777779046,-0.255411614102255  
"Hist1h4n",8.04644622100177,-2.27538436711909,1.05241615875048,-2.1620  
576120958,0.0306137357370506,0.0798644125503095,-5.75086316409673  
"Hist1h4m",5.49671063829109,-1.22211358151377,0.918704953942412,-1.330  
25687547384,0.18343365057252,0.311576733065859,-1.42511842492412  
"Hist1h2bq",11.5762773153657,-1.68201080658281,1.04086285037402,-1.615  
97736529688,0.106099207064528,0.205986492018736,-2.65748403408598  
"Hist1h2bp",0.253236983553809,1.39592929185686,4.73695172104063,0.2946  
89364397869,0.768231188562038,NA,NA  
"Hist1h2an",0.229006190431175,-0.07144737337235,4.7847199059604,-0.014  
9324045663252,0.988086107695923,NA,NA  
"H3c3",2.74430575778579,-1.84361210994298,1.18605021395339,-1.55441320  
127398,0.120085886300743,0.226606965512845,-2.73691258773609  
"Ctxn3",86.9569777018935,2.07346207604005,0.719918324502089,2.88013515  
626804,0.00397504725433849,0.0167181776024788,8.48306970035251  
"Gm5507",3.66027718307669,0.225924054565297,0.889312345827153,0.254043

537824907,0.799461922829575,0.872022897947082,0.0309379488276014  
"Prdm6",36.8396079146724,-1.59751194853437,0.471551826070205,-3.387775  
97755825,0.000704617900708312,0.00448975157778126,-8.63608234914239  
"Gm8444",2.41613250428182,0.746067065186318,1.12330123398215,0.6641736  
36257375,0.506579184981679,0.641215330353985,0.331544705558695  
"Dsg1a",6.67278445768223,-2.65891271088052,1.007852397512,-2.638196542  
91081,0.00833482595662089,0.0293771536893514,-9.37941560536467  
"Rdh16",3753.11251206449,2.02568405854812,0.59258099666068,3.418408740  
68402,0.000629884367262199,0.00412130382311354,11.1242176162644  
"Epc2",1414.43754412659,-0.0766682234078198,0.0796952876544486,-0.9620  
17023393479,0.336041052775512,0.480533833473155,-0.0561868932692795  
"Lyz1",632.649768725303,-2.24397957968079,0.672315784104045,-3.3376868  
9169065,0.000844788873959112,0.00517814947012096,-11.8107546226889  
"Lyz2",23402.6360188941,-1.39467030996636,0.466948755420965,-2.9867738  
0285344,0.00281938243319971,0.012902076774174,-6.06732767886538  
"Tmem19",4552.97558551814,1.13992205819586,0.262127472426449,4.3487317  
3591414,1.3692708176045e-05,0.000217520471741762,9.61321075116857  
"Scyl2",2244.20926552183,0.236095107445682,0.156320972225747,1.5103226  
6550089,0.130961111000102,0.241395324473434,0.335566542028623  
"Gm4925",21.6563058969512,-0.137729665399844,0.392637350773591,-0.3507  
80854466554,0.725752761578004,0.819476913669673,-0.0274204685765108  
"Dazap1",4556.02705527783,-0.174482618066981,0.123622491524388,-1.4114  
1483168182,0.158122332207595,0.279010790351465,-0.222727903459675  
"Tspear",16.8971277478726,-0.788033451051827,0.382950736969972,-2.0577  
9327463109,0.0396099819425243,0.0971588159410415,-1.83722777701381  
"Gm11733",0.780346352639779,-2.33421171668183,2.28384550409657,-1.0220  
5324856472,0.306755698738936,NA,NA  
"Ank3",6497.49702566236,1.15118789139465,0.328856925262711,3.500573662  
77147,0.000464257911472476,0.00325849559319306,6.59226556207987  
"Cd300ld3",82.559917098993,-1.71267514443894,0.538093856192051,-3.1828  
5578757411,0.00145830227791634,0.00787208688117742,-8.29693841671992  
"Cd300ld4",9.67614469078764,-2.91655065486635,1.15473574112024,-2.5257  
2995795291,0.0115458191420952,0.0379182047553599,-9.54389854666526  
"Gm10273",0.96221635748513,0.4.78471990594969,0,1,NA,NA  
"Strada",1185.9119001776,0.0573352519984972,0.159224055101185,0.360091  
645461871,0.718778600274402,0.813754205630784,0.0118166186873784  
"Pex11g",926.625506355319,0.725579580949793,0.331383245864006,2.189548  
1742235,0.02855702113171,0.0758176467900438,1.87157753460654  
"Marcks",9292.8974543105,-1.07336771481172,0.255214239566336,-4.205751  
67214653,2.60215834937936e-05,0.000350778232908731,-8.5390226651101  
"Nkain2",12.6597850838366,0.0530617225168809,0.50175939198757,0.105751  
328952095,0.915779654028787,0.948401052768082,0.00281109410555109  
"Pcgf1",475.49258309561,0.397415430479133,0.153223056760097,2.59370514  
387642,0.00949478763698471,0.0324902368104472,1.36186941298553  
"Gm10275",16690.8324096492,-0.336710457863486,0.151149439555365,-2.227  
66593679728,0.0259028001171909,0.0703808245101711,-0.893573806705049  
"Taar5",0.160425824985691,0.4.78471990596563,0,1,NA,NA  
"4930444G20Rik",0.31664630205461,-0.106191335347371,4.78045990571398,-  
0.0222136232583905,0.982277550483813,NA,NA  
"Zfp975",392.314515298646,-0.068157066468936,0.116433060283851,-0.5853

75547999655,0.558295226530216,0.687094636551547,-0.0255782049307929  
"Arid1b",3120.56989453647,0.0132669626232093,0.134125138054031,0.09891  
48105694016,0.92120590944303,0.951510982800244,0.000659421769530627  
"Ube2u",314.923873853331,2.28442774997056,0.595862714862833,3.83381556  
353367,0.000126170758586867,0.00119363292136183,15.3759206386081  
"Zfp820",169.731286098432,-0.707864785241975,0.186636424529056,-3.7927  
4724656855,0.00014898978496321,0.00135557761419164,-4.67440466902777  
"Psm3",5696.1111065417,0.278593654481635,0.171574998695321,1.62374271  
659681,0.104430730207721,0.203901533173698,0.442996807573735  
"Zfp125",442.047180989492,-0.250575743825697,0.16855214370215,-1.48663  
635075738,0.137110881638852,0.250246931591719,-0.347124362580753  
"Tmem100",93.0303477239058,-2.08251068177568,0.524477156342605,-3.9706  
4134555999,7.16794156647123e-05,0.000764600497677384,-14.9444237852853  
"Msi2",4489.92733674971,-0.0518018581087354,0.175404460855076,-0.29532  
8054122498,0.767743287650524,0.84986139562904,-0.00842723023102502  
"Wfdc17",408.180448977564,-1.35481168999377,0.34535905200723,-3.922907  
71624369,8.74866681790471e-05,0.000890016462292256,-9.51656392046171  
"Slfn9",551.045982850829,-0.412486964473928,0.333229131655103,-1.23784  
785089216,0.215772481849656,0.35091599391981,-0.43195982139807  
"Gm10277",10.2284421277538,0.658935011776204,0.83840391433696,0.785939  
808376627,0.431902751310202,0.573966728806319,0.365830075482168  
"Fbp1",18296.1624114982,2.20652890395688,0.812201249701828,2.716726802  
33739,0.0065931005074724,0.0245891877763383,8.17617911576007  
"Cacng7",242.707966776693,-1.19942608202173,0.240890905665356,-4.97912  
562829568,6.38721744862411e-07,1.92188218847643e-05,-13.0253120117279  
"Fam57a",303.973634657436,-0.733979275315937,0.273840896062266,-2.6803  
1286002309,0.00735533789870047,0.0267414466434574,-2.65813575129391  
"Ccdc92b",16.9206045662967,-0.387574894120081,0.492547745558027,-0.786  
877815633857,0.431353395185841,0.5735439660425,-0.21546089972846  
"Gm49340",5.80008609240492,-1.15469231114352,1.38903095632898,-0.83129  
343221782,0.405807883956631,0.54962782171342,-0.691099418771947  
"Nlrp1a",16.7038968131027,-1.31544038184753,0.749461995646265,-1.75517  
956812903,0.0792285976068684,0.165095564405121,-2.36941172414901  
"Ahnak",15443.8745995898,-0.96527979147019,0.244681977309622,-3.945038  
38036555,7.97871980946118e-05,0.000829957558035776,-6.84782611234882  
"Sat2",543.406380902365,1.36376270778663,0.19613622546052,6.9531403726  
3933,3.57242895425143e-12,1.78603127564088e-09,27.470640224887  
"Sco1",601.397386375737,0.103979651141737,0.204501434851248,0.50845438  
428034,0.611134721523095,0.730854519307396,0.0326018687251199  
"Slc47a2",41.9890062797902,1.02985640615943,0.393509872931085,2.617104  
36510392,0.00886792230252839,0.0308156743993403,3.58362409561027  
"Rps12-  
ps9",23.736410784649,0.600482347428395,0.519296712399394,1.15633766417  
254,0.247543068139915,0.386870370518761,0.57025742993922  
"Pabpn1l",17.3424451255338,-0.814280442458584,0.720657367641315,-1.129  
91343601148,0.258512701827384,0.399594154132736,-0.74694422286344  
"4930438A08Rik",1.02318972491479,-2.53834579367617,1.97574901402918,-1  
.28475113774683,0.198879262061996,NA,NA  
"Irgm2",1927.15082773578,-1.0390259849313,0.441713579529935,-2.3522618  
1191218,0.0186596360660107,0.0544812195290621,-3.02346091609576



"1700024J04Rik",2.91592766470277,-0.820374651482749,1.08119655953731,-  
0.758765503132773,0.447992845055188,0.588756190336407,-0.4345878268998  
09  
"9930111J21Rik2",2405.61562267588,-0.191488340455916,0.335368678494082  
, -0.570978605741488,0.568014145282447,0.695075271121819,-0.06965103746  
41979  
"9930111J21Rik1",48.1854782247164,-1.01686525504862,0.655706126959355,  
-1.55079419459452,0.120951012304096,0.227946622606267,-1.5035814934364  
4  
"Atxn1l",2010.70481389832,-0.0731520766186263,0.125122587437231,-0.584  
64325360378,0.558787617594272,0.687570425839525,-0.0274021107837692  
"Gm12166",12.3746636221637,-1.22945920661224,0.554631850470496,-2.2167  
1223094974,0.0266427624508171,0.0719502191504199,-3.23566713407776  
"Spdl1",109.203388960179,-0.124339354331832,0.319815514724734,-0.38878  
4623031348,0.697435476758837,0.79808656176089,-0.0280432759097152  
"Insyn2b",13.8317177485723,-1.77739475870704,0.849023434232282,-2.0934  
5783289742,0.0363083044545901,0.0909947712410794,-4.2603321132096  
"Anp32-  
ps",0.327861021431765,-0.0722735395048099,3.88115663244318,-0.01862164  
9768181,0.985142931812207,NA,NA  
"Hba-  
a2",8191.49367241999,-0.0644683976500117,0.279629840898738,-0.23054906  
2442008,0.817665143768398,0.883107669311625,-0.00801394724607786  
"Hba-  
a1",5366.27457089004,0.177191866269991,0.255647504256779,0.69311009620  
5026,0.488240462157477,0.624817047200478,0.0833326962095556  
"B3gnt9",392.754821412782,-1.36067321009063,0.349571234695809,-3.89240  
611080219,9.9254916003136e-05,0.000985138054305071,-9.41957157800595  
"Ces3a",20.6151278176778,1.28719336288484,0.660328236843027,1.94932351  
982826,0.051256801515008,0.118637834275834,2.74388413657336  
"Gm12070",17.3340087671107,0.333756413286736,0.779793753623075,0.42800  
6010225189,0.668646744640205,0.775920047887311,0.0846759362293483  
"Gm5356",0.149054616161455,-0.0676124033290223,4.78471990596623,-0.014  
1309010052426,0.988725547477153,NA,NA  
"Rps13-  
ps2",41.1574967086835,3.4160934346237,2.94564211067655,1.1597109581785  
2,0.246166507121591,0.385243964672669,3.25853798189355  
"Gm8054",0.499386666485729,-1.25248565076012,2.63947909698702,-0.47452  
0011236246,0.635129131345664,NA,NA  
"Olfr372",5.71664241616021,0.556143707091865,0.574704010164297,0.96770  
4587502137,0.333191926368564,0.477865110727051,0.4106714076498  
"Fcho1",434.183914350178,-0.934722102722573,0.400943952817677,-2.33130  
365517103,0.0197373536285424,0.056861542708233,-2.6799754294384  
"Ell",1601.81062552955,-0.316551797637219,0.15732494938354,-2.01208898  
44719,0.0442105576533477,0.105898950015353,-0.71074423609715  
"Ssbp4",2754.67125235913,-0.247924355988505,0.224366488335052,-1.10499  
726509189,0.269160774191267,0.411454078806846,-0.220171172953899  
"Gm10283",0.130991149872174,0,4.78471990596534,0,1,NA,NA  
"Gm10284",3.72351375974585,0.983917397133915,0.965003088535693,1.01960  
02570592,0.307918083043598,0.452800160260767,0.779562081175771

"Sp140",756.161432158318,-0.980782884495383,0.306750294956739,-3.19733  
314236488,0.00138704632200731,0.00757128476665695,-4.78954778987296  
"Sp110",1533.64997208716,-0.956449474615284,0.272359277407796,-3.51171  
982727513,0.000445217086943963,0.00315208524373035,-5.50885349117326  
"Fam149a",1849.4747731576,0.266477060011424,0.249385808064177,1.068533  
37838234,0.285279982264847,0.429494949749053,0.225211833779007  
"Fat1",4110.24621676127,-0.888793236189894,0.301422442119539,-2.948663  
11194378,0.0031915167110506,0.0141556398617071,-3.78416355170689  
"Mfhas1",2224.21289307507,0.362518156811351,0.226169567058325,1.602860  
02014526,0.108965562087257,0.210295014310336,0.565254226121336  
"Gm13268",0.371993727289741,-0.545995097750808,3.03492593144936,-0.179  
903928492272,0.857227991033048,NA,NA  
"Slc22a14",30.9074263264017,2.73047214616614,0.67191409028355,4.063722  
1121734,4.82963206091101e-05,0.000563912898686245,20.4255992983221  
"3000002C10Rik",292.448570370691,0.0918769276802292,0.285680357438003,  
0.321607437431774,0.747750108708324,0.835944176232897,0.01646374300034  
29  
"Ndufaf3",1095.49999319805,0.695996452178874,0.180639277807808,3.85296  
299135664,0.000116697034230297,0.00112197178176643,4.72767256583883  
"Gmppb",833.626702302876,-0.204766165932053,0.17635964734039,-1.161071  
53206559,0.245612810668093,0.384734408571195,-0.19559305749973  
"Slc35g2",137.121972839939,0.375435855036304,0.387541957975403,0.96876  
1826455275,0.332664036911314,0.477459211755377,0.277550921073591  
"Ddx43",26.4072626269404,-0.830335378509789,0.350581489987942,-2.36845  
184992039,0.0178627053202662,0.0526749891613051,-2.44418728085041  
"Trcg1",0.148177164577155,2.59891947282788,4.7275994170606,0.549733436  
265582,0.582502219767124,NA,NA  
"Scn2b",155.880304208897,-1.56026727230936,0.461996852671082,-3.377224  
89512322,0.000732211565570431,0.00463076909033158,-8.38648700785085  
"Mpzl3",351.422132641954,-0.662589697089173,0.249342292201401,-2.65734  
982717645,0.00787576703020041,0.0281609582899042,-2.36532510308255  
"Ccdc153",0.260176559853529,0.475205867343033,4.77906150747709,0.09943  
49762185627,0.920792913353949,NA,NA  
"Pate14",6.81091023548682,-2.07395441531128,1.58699351852707,-1.306844  
91845699,0.191265386252306,0.321032319802051,-2.35645495565741  
"Eif3g",4082.80659275705,0.0907098812228972,0.102747117521306,0.882845  
995208456,0.377319485532497,0.522549565232802,0.058873927486139  
"Mmp27",19.8433515349025,-0.508115743797213,0.55649393128298,-0.913066  
100515718,0.361207777952285,0.506132177830661,-0.3460051873791  
"Fbxw22",6.75176656723036,-0.726136080641732,0.807946496093987,-0.8987  
427808057,0.368789684143843,0.513786888720227,-0.483567936012475  
"Rnf213",4849.09720732559,-0.60516288482743,0.251133791136849,-2.40972  
30487699,0.0159646341822423,0.048417862386897,-1.83236451460332  
"Tmem235",2.40389778585926,1.5577394338198,1.4708068224963,1.059105390  
31629,0.289551785379369,0.433338830566076,1.30263676251603  
"Qrich2",2.3688472307715,-1.25087356089367,1.44761850178524,-0.8640906  
14585993,0.3875381143663,0.531865851616394,-0.789756509949672  
"Trim80",3.88751871080224,0.16651775952804,0.942401454672144,0.176695  
160143545,0.859747842705774,0.911052360710716,0.0155119479813285  
"Fbxo47",10.9897123028998,-0.314495728938555,0.724664025700173,-0.4339

88328087196,0.664296916882103,0.77245117398421,-0.0811985444139415  
"Gpr179",21.2622607243029,0.578588496872839,0.433678612100589,1.334141  
18365293,0.182157590962295,0.310274194861783,0.677121465756264  
"Gm10288",1595.11022465552,2.14920204789716,1.43257951476513,1.5002322  
9129416,0.133554241400221,0.245086174006729,3.02209057254836  
"Hsf5",20.6407421923897,0.750482620308478,0.389367614720905,1.92743975  
599105,0.0539248490981634,0.123132299767653,1.57188276660009  
"Ccnd1",6975.59935041185,0.595229578401073,0.255033187179153,2.3339298  
8961449,0.0195993933580296,0.0565643830217379,1.70972301685091  
"Evi2",173.33238284684,-0.980570835429514,0.448291438721412,-2.1873512  
4236643,0.0287168926372306,0.0761278324574352,-2.52530461483473  
"Plpp4",7.76095712777193,-1.67981285472236,1.37392026146267,-1.2226421  
7352326,0.2214648768211,0.357273960863772,-1.72895140240292  
"Prok1",316.479639046773,2.42329915444543,0.609556956479654,3.97550898  
022819,7.02288936196721e-05,0.000752454088464517,17.4287808735333  
"Itgad",7.31884456066617,-3.64715246517655,1.70211152543525,-2.1427223  
8374271,0.0321353969138858,0.082836590299702,-9.0846388393843  
"Prss36",357.287616148489,0.22807232982146,0.302274432162964,0.7545207  
45236234,0.450536593358608,0.591142987180469,0.119897019339671  
"Capza1",3707.88551739435,-0.594174181579891,0.136268102315939,-4.3603  
3210620554,1.29865192451512e-05,0.000207720387401114,-5.03819163928937  
"Olfr406",0.143496190699501,2.13905051906252,4.75861871486567,0.449510  
802868119,0.653063216902212,NA,NA  
"Olfr403",0.313713952385504,1.38200209437123,4.78471990595842,0.288836  
571739596,0.772706444091295,NA,NA  
"Ampd1",2.32932647630291,-0.687080069825079,1.78515445498299,-0.384885  
502712215,0.700322247232887,0.800497313667887,-0.152890501633146  
"Fbxo39",3.86180727149762,-1.5334800924472,1.04207528270609,-1.4715636  
3642463,0.141138751260331,0.255802507164337,-2.09066945319101  
"Nlrbp1b",362.159429910389,-0.897855593337524,0.427298354926662,-2.1012  
3812316484,0.0356200684043341,0.0896965121719884,-2.16502019658458  
"Tmem256",2795.8254427908,0.969587394021796,0.253265564712403,3.828342  
77183642,0.000129009004008254,0.00121283392485676,6.51058113919625  
"Hs3st3b1",417.04653458607,-0.123844597511322,0.273631432616895,-0.452  
596386047192,0.650839401577935,0.762051070880455,-0.0336537418831958  
"Olfr2",9.51859545695744,0.696681598782761,0.721718838156403,0.9653088  
73691591,0.334390128524404,0.479106759883857,0.512640492726175  
"Cyp3a57",40.5968006169308,-2.73130213448487,1.02567969421715,-2.66291  
918411188,0.00774660165247926,0.0277959585977256,-9.7858858470944  
"Zscan25",305.860622962049,-0.464992724727729,0.23658996109361,-1.9653  
9499215585,0.0493685386566527,0.115249872075022,-1.00468778945739  
"Olfr658",0.535799336007516,-2.83516877158022,2.36378019098446,-1.1994  
214954477,0.230364093467848,NA,NA  
"Olfr558",223.158377250436,-0.961271647120103,0.223194801051357,-4.306  
87293159179,1.65578662028087e-05,0.000248151633529872,-7.9799682913421  
7  
"Art5",26.9766956793494,-0.413791991558344,0.53540042165318,-0.7728645  
23118341,0.439602562517012,0.581489980400399,-0.224342102465011  
"Xntrpc",302.962612958945,0.375544198106194,0.324188830382639,1.158411  
89735914,0.246695986283802,0.385886750145333,0.357597446350465

"Rnf121",1183.71590847965,-0.272756648894487,0.11085023071457,-2.46058  
711052044,0.0138709894365706,0.0436290614670518,-0.854282498888637  
"Il18bp",466.908681793745,-0.443596887922156,0.269863972258024,-1.6437  
7958350817,0.10022174008427,0.197685734766119,-0.719104582473275  
"Serpinh1",16669.3043464288,-1.55145828181097,0.227808124247153,-6.810  
37292650618,9.73460662530747e-12,4.0384119144733e-09,-29.9856770014777  
"Gm10291",2.79456243896838,2.12908807592194,0.901943610321561,2.360555  
63957361,0.0182475807854827,0.0535159665212278,6.23349133107748  
"Vmn2r89",36.8906409964581,0.697795774942337,0.476603353880308,1.46410  
168804137,0.14316616613595,0.25869380924309,0.943496729223929  
"Vmn2r73",28.7267708015011,0.782254813970916,0.319956271481187,2.44488  
039052834,0.014490018797808,0.045132010626144,2.42355332349899  
"Olfr290",0.0781092737083837,-0.544048378937457,4.78471990596623,-0.11  
3705376621746,0.90947135024012,NA,NA  
"Tlnrd1",1169.39491134723,-0.761941290103676,0.137075848044597,-5.5585  
3785311458,2.72043963636732e-08,1.73264480341006e-06,-10.1078076475625  
"Gm9696",1.01023264307585,-2.16350761311319,2.10548592867947,-1.027557  
38409048,0.304158079193925,NA,NA  
"Adamtsl3",33.2332742457598,-2.06181220406551,0.663015594668001,-3.109  
74918334755,0.0018724627028216,0.00949032435134274,-9.6028542354657  
"Erich6",8.55145984776121,0.00977107239065556,0.636882535632862,0.0153  
420322335361,0.987759309549516,0.992084222819578,7.76533823842877e-05  
"Cldn3",1671.89614891475,0.00298005687064489,0.582433706300742,0.00511  
655977050566,0.99591759376704,0.997247393347871,8.21423483823622e-06  
"Fam217b",457.035794876376,-0.99261743319485,0.262245234827839,-3.7850  
7328778154,0.000153663287566659,0.00138453178418425,-6.53379830049115  
"Gm10293",6.05769856715337,0.585751172634614,0.709597567765382,0.82546  
9532652462,0.409105073095708,0.552787991352745,0.347222007757993  
"Chchd2",22159.5909271668,0.224053296470501,0.410243581976578,0.546146  
987579914,0.584964903055815,0.708909545638777,0.0770804597795862  
"Ctcf1",69.003013887214,0.0864715790987306,0.31216616428192,0.27700497  
0406201,0.781776289602333,0.858947133837245,0.0131478222482896  
"Tmem132b",11.0393277098243,-2.33291677129084,0.968882990690935,-2.407  
84160079761,0.016047141762329,0.0486302720052675,-7.05359499706662  
"Ifi214",39.9569911600952,-1.39974263835178,0.547366540245121,-2.55723  
091463529,0.0105509152611261,0.0353749819381806,-4.67759056864094  
"Fcr16",0.679252792242218,-0.225265623124159,2.70663319321415,-0.08322  
72447145504,0.933670849736788,NA,NA  
"Rgma",486.110862718817,-1.30235668890194,0.309679166648946,-4.2055030  
7918615,2.60502041877035e-05,0.000350778232908731,-10.3607115540475  
"Nsmce3",1012.30246897953,0.133551240968585,0.144508689010522,0.924174  
46925188,0.355395485895418,0.500469535171808,0.0924453109773585  
"Gm6505",0.687236756850971,-2.2322007309539,3.09095320339916,-0.722172  
282808787,0.470188562001039,NA,NA  
"Fcr1b",12.5166260916854,-0.817149983985035,0.71663347664031,-1.140262  
08741456,0.254177127736799,0.394770243477147,-0.75950115200456  
"Peg12",32.211097103636,-1.47026807750897,0.35078615192495,-4.19135153  
836841,2.77297614735223e-05,0.000366807930265086,-11.6308088038894  
"Mkrn3",100.707064368107,-0.268286351384606,0.232414719312857,-1.15434  
320243488,0.248359491000037,0.387773330839104,-0.25415686528638

"Wfdc10",0.687645127274271,-2.92171932922991,3.032627806582,-0.963428259441738,0.33533265028013,NA,NA  
"Wfdc16",118.510023528072,0.829625110606408,0.585976597602932,1.41579905067911,0.1568343476258,0.277488400828238,1.06355960149393  
"Wfdc6b",3.84188018212954,-0.260994608134033,1.12691575167444,-0.231600816428584,0.81684807333348,0.882761056939136,-0.032546215208764  
"Ccdc190",28.6381392595367,-0.190299563278126,0.396098688360381,-0.480434722129113,0.630918309575481,0.746504350998406,-0.0556348068356158  
"Wfdc8",8.96139690246625,-0.881845019710234,0.738176287905607,-1.1946265873864,0.232232956643309,0.369458037352203,-0.878069057284311  
"Top1",8595.7193322095,0.44828586443554,0.189212169897975,2.36922320946512,0.0178254919638205,0.0526050313774137,1.32017654720625  
"Mrgprb3",0.524616831736465,-0.0705144770438465,4.54698872788213,-0.0155079507040455,0.98762694151182,NA,NA  
"Mrgprb1",1.17419118092541,-3.75118386163111,2.26567912411648,-1.6556553934326,0.0977916254767484,NA,NA  
"Spaca4",0.0886915477092956,-0.544048378937457,4.78471990596623,-0.113705376621746,0.90947135024012,NA,NA  
"Ntn5",1.92382741388185,-0.62981169056155,1.08906365259861,-0.578305674841649,0.563057763771426,0.691036714169779,-0.232754672478989  
"Rasal2",893.09893206761,-0.0762947305127709,0.152761956953335,-0.499435409406788,0.617472679092123,0.736134655881272,-0.0233722971674445  
"Slc6a21",1.03660948753491,0.0366117676722462,1.91798606562416,0.0190886515436346,0.984770384538366,NA,NA  
"Slc17a7",3.39690450782729,-0.653644938791142,0.857597388785273,-0.762181586999681,0.445951634047852,0.587035171527478,-0.34817740481871  
"Trmt112-ps2",326.938321208645,-0.665407517413763,0.482675690893856,-1.37858096019195,0.168023990259451,0.29178230869957,-0.819613894943469  
"Mn1",195.03239935731,-0.548760663358834,0.252953771964188,-2.16941087336908,0.0300515041953611,0.078798309413818,-1.39432606953946  
"Gm572",0.681397164889672,0.2.99613625635873,0,1,NA,NA  
"Fv1",86.9918441616317,-0.840189392720494,0.295771674978075,-2.84066888008385,0.00450190292031473,0.0183176342112472,-3.36066604486367  
"Gm4788",3.78875778904959,0.245014669560486,1.00037375709882,0.244923127802805,0.806515953587357,0.876948921651031,0.032172026166201  
"Vmn2r84",2.10428775171068,-0.760433591880387,1.18774524305107,-0.640232908807106,0.522021190943642,0.655316068826882,-0.321387837287213  
"Vsig10l",381.053396997846,0.690684991889931,0.266825080386398,2.58853099899653,0.00963862711689263,0.0328555859309742,2.3591267996629  
"Zfp992",644.883853997958,-0.467248962058801,0.134880081600216,-3.46418060039233,0.000531849312782139,0.00363349611094119,-2.62479906913674  
"Gm13127",0.897259788444377,-0.72655278096162,2.15571093956721,-0.337036273104169,0.736089556172991,NA,NA  
"Srap",21.4862855256327,-2.30520526025459,0.511303625320248,-4.50848604644795,6.52918623298742e-06,0.000121591282875634,-20.7810687549498  
"Lrrc8b",1299.63434112035,0.823679414234513,0.264758346849756,3.11106117723998,0.00186416314373705,0.00945317372602991,3.83950313385418  
"Sox13",2180.12971810983,0.1050809390954,0.156122073670502,0.673069071047408,0.500903349538479,0.636088680958584,0.0475404336849276

"Etnk2",358.255101734462,1.48458778181655,0.391742367928389,3.78970441  
636769,0.000150826650309038,0.00136782233847703,9.79016658918098  
"Ren1",2284.61207025931,0.475850164321942,0.551227545456438,0.86325541  
6468565,0.387997050961723,0.532270913927508,0.300072390114065  
"Rnf186",610.328239489596,1.44492792721524,0.629124401497481,2.2967284  
7496605,0.0216342640051385,0.0611961235415915,4.03665387198448  
"Rpl31-  
ps10",0.743846604852371,-0.997942359433962,2.19596698566873,-0.4544432  
43430667,0.649509833805486,NA,NA  
"Lactbl1",0.811318234272837,-0.0569567445121045,2.09141048185552,-0.02  
72336516462192,0.978273375521105,NA,NA  
"Htr1d",19.7553604329743,-1.94189298557489,0.758556710094657,-2.559983  
92701921,0.0104677004429192,0.0351652693377048,-6.5008680598927  
"Albfm1",50.3351878397409,2.2259647602107,0.661980267904066,3.36258475  
990298,0.00077216417080339,0.00481935243352256,11.8757795617436  
"Runx3",597.847204181465,-0.993134378453457,0.451232936058182,-2.20093  
503619027,0.0277406231669819,0.0740636273462704,-2.58496067549961  
"Rps12-  
ps10",0.50903104705068,0.385725453191967,3.12156225012828,0.1235680797  
89572,0.901657267379329,NA,NA  
"Cntnap5a",30.4063536041464,2.67555098812817,0.836261766764054,3.19941  
804643457,0.00137705331827865,0.00752305564578233,13.0828634368568  
"Utp3",1929.15005026417,0.030048939916753,0.10155121252223,0.295899371  
070287,0.767306931385194,0.849739749379717,0.00489272325685897  
"Sars2",571.691982131931,0.129647926139541,0.152161532478971,0.8520414  
06440613,0.394191110878442,0.538596812182937,0.080224583167078  
"Ugt2b36",3.22784089586888,1.49121272909796,1.13455715866276,1.3143566  
3484383,0.18872621658922,0.317907885188476,1.70892025479415  
"Eid2b",400.412546298991,0.014402631417233,0.168358630681602,0.0855473  
304749736,0.931826269074753,0.957426856800689,0.00062660017108463  
"Gtsf1l",0.340645032147182,-1.40330166134147,4.76831255329929,-0.29429  
733174066,0.768530711385842,NA,NA  
"Zfp974",436.239096866125,0.237596755970924,0.178236344257045,1.333043  
25198834,0.182517610380198,0.310588965543122,0.27781829789589  
"Gm10282",46.9346688379283,-0.0376710751902398,0.362984528513939,-0.10  
378148992869,0.917342756035281,0.949331351328659,-0.00195879732116202  
"Tmem200b",380.533901778045,-0.901690201281342,0.268478313462143,-3.35  
852154929633,0.000783606112560978,0.0048798313582606,-4.79937649645547  
"Gm12966",0.381861838896379,-2.01001662038639,3.84283520833264,-0.5230  
55637678127,0.600935535803893,NA,NA  
"Rmdn3",2472.79089695071,-0.417030002159128,0.393868910592786,-1.05880  
406130934,0.289689023675999,0.433455343690786,-0.348623111912371  
"Rbm44",8.19347691294221,-1.36788501901593,1.16409294511753,-1.1750651  
2237974,0.239968662974462,0.378246482673893,-1.32987043464014  
"Fryl",2982.56028443349,-0.204938876603474,0.173440996492018,-1.181605  
73767751,0.237362175837464,0.37550407338571,-0.200734752278724  
"Tmem35b",889.383171395899,0.369385961071622,0.101687785507949,3.63254  
995894022,0.000280634220453077,0.00218959825145822,2.26213336631891  
"Dgkd",3443.37640238166,-0.318745640096786,0.246082057660965,-1.295281  
91988679,0.195222993917734,0.325807900162954,-0.357456448502901

"Ceacam20",1.5197049367955,2.25996367824058,1.60114111843651,1.4114706  
3941959,0.158105886970794,0.279007021826096,2.88488505959927  
"Rpl7a-  
ps8",0.630651497445571,-2.21455680388181,2.82719123640666,-0.783306334  
34493,0.433447244390842,NA,NA  
"Rbm47",7695.91356975043,1.21787926457652,0.238563152025573,5.10506025  
023497,3.30689136692272e-07,1.16176158328395e-05,13.8387474755169  
"Pnmal2",422.952834396217,-0.265506878893045,0.361713379198104,-0.7340  
25596403587,0.46293313804922,0.602152790239072,-0.134676787603868  
"Cited4",147.829224315057,1.38874622378711,0.40927732512512,3.39316678  
089253,0.000690895590873644,0.00441819686154618,7.5298148220089  
"Zmynd12",47.5873070963056,1.91946813647916,0.46561229876949,4.1224601  
2734605,3.74847509150444e-05,0.000464049316407324,14.7329155450228  
"Bicra",1000.27993755986,-0.115495024414698,0.231612650168253,-0.49865  
5942716418,0.618021787172848,0.736429065959554,-0.0353348203446834  
"Zswim9",637.231592746515,-0.305508477626867,0.154067348060091,-1.9829  
5408776498,0.0473725581832421,0.111675751354958,-0.669722145653411  
"Vmn1r87",238.262554044264,0.693959007116206,0.40187858815851,1.726787  
71042784,0.0842057964281432,0.172934971429949,1.21778677619063  
"Vmn1r86",11.7858727582265,1.3802693776263,0.74275063806077,1.85832136  
237542,0.0631233919691855,0.138679205812773,2.72684898147357  
"Vmn1r85",5.96632374563346,1.5502977714838,0.71862282020629,2.15731775  
820696,0.0309809142781628,0.0805850942630228,3.90433437106127  
"Zscan18",138.898424669346,-0.407891716892128,0.276355839612982,-1.475  
96561543029,0.139953123107278,0.254268169432139,-0.55855296058585  
"Gm13015",0.250005489867457,-0.18548539901363,4.77842545748626,-0.0388  
172632729959,0.969036081105638,NA,NA  
"Aurkc",1.40927325133546,1.08887299604926,2.01300325993975,0.540919638  
690424,0.58856297402151,0.712075010391623,0.369750804366008  
"Vmn2r34",0.487347171723503,-1.04994556293661,2.66796352785917,-0.3935  
38199444244,0.693922016119682,NA,NA  
"Vmn2r30",4.72347008257572,1.11051323864712,0.657380600634329,1.689300  
2890191,0.0911618980327154,0.183832318527447,1.88091097497084  
"Olfr1150-  
ps1",8.59608472457524,0.207100829413941,0.700914152030883,0.2954724609  
48136,0.767632986706514,0.849837719005984,0.0336973483145931  
"Olfr1116",32.3063623088105,0.33944085985724,0.393952430227755,0.86162  
9054200782,0.388891677518929,0.533048149614346,0.213557018050375  
"Gm1673",109.821840233697,-0.745792347117053,0.346688748844026,-2.1511  
8705064346,0.0314614387161939,0.0815013161440769,-1.86980292391339  
"Zfp804a",5.33875290049851,-0.839329259415583,0.980579572350459,-0.855  
952217527541,0.392024209980764,0.536512111055306,-0.522621912643643  
"Trabd2b",7974.56124083495,1.47015497903084,0.319127958535593,4.606788  
40480495,4.08935746827669e-06,8.50952955351749e-05,13.777908467113  
"Skint3",74.3144430149291,-1.15234101513829,0.403282658471156,-2.85740  
284371962,0.00427123370945864,0.0176329348870441,-4.65313783731114  
"Ccnyl1",955.872939902299,-0.0956320842421905,0.139779627648562,-0.684  
163249330094,0.493872085992357,0.629916105843948,-0.0441981497207909  
"Lilra5",325.552577028803,-1.10789871316072,0.418411789347295,-2.64786  
686553216,0.00810014179287718,0.0287680445678541,-3.93136758385391

"Ldlrad1",2.34794589438469,0.323934372621158,1.08328277314393,0.299030  
299984396,0.764916926645552,0.847825885870919,0.0534750821952256  
"Gad1",91.2076854676035,-0.725057707841632,0.602856576476514,-1.202703  
48891164,0.229091083318787,0.36562314336987,-0.729518363622746  
"Ccdc173",354.424661462068,0.694681124768098,0.262447248388647,2.64693  
62092125,0.00812246733637937,0.0288210861009508,2.46378942419517  
"Gm12794",0.0766118744664315,-0.0618313090175059,4.78471990596623,-0.0  
129226600997911,0.989689495990023,NA,NA  
"Gm12689",130.148784247798,0.736188584375465,0.396836470913272,1.85514  
346169145,0.0635757428428134,0.139406105336438,1.45055947235503  
"Gm13288",1.6032608456347,-2.53164715978728,2.5154625357358,-1.0064340  
5489907,0.314206818820036,0.459388463808719,-1.9692647824276  
"Klhl9",3338.8932862025,0.000686097393819236,0.184850748712919,0.00371  
16289687567,0.997038555349972,0.998011076144246,1.36595431423594e-06  
"Speer4d",2.23558776767986,2.31499688064883,1.47936024191812,1.5648635  
2346959,0.11761491314072,0.222992568690953,3.47392328590025  
"Rraga",1824.93857010678,-0.580040779137861,0.247206116337216,-2.34638  
522594895,0.0189565035643683,0.0551691409568523,-1.68058203463841  
"Tgfbra1",2818.34522064387,0.340364941560492,0.100859964019288,3.3746  
2882195162,0.000739153120159259,0.00466408010901787,1.82703293927984  
"Il1rl2",402.84396018036,-1.30162391788715,0.24776658234407,-5.2534280  
6754949,1.49293999270876e-07,6.24065568814102e-06,-15.5992146163547  
"Rabepk",798.812622868276,-0.0462738715335665,0.18884464474487,-0.2450  
3671574104,0.806428002715085,0.876948921651031,-0.00607606152096869  
"Gm19680",43.3554100424157,-3.3738549959766,2.96563644674783,-1.137649  
55906056,0.255266843635284,0.396015309344929,-3.12521000874671  
"Dnajc25",819.911120113503,0.27764938499693,0.210165294142436,1.321100  
07092207,0.186467999427266,0.315165833289948,0.320589618184925  
"Actl7b",1.91847411158053,0.67360391057096,1.30693654661913,0.51540674  
4354562,0.606268820562476,0.726787484894267,0.214961262717252  
"Acnat1",286.191535881097,1.76815503704993,0.779971393110221,2.2669485  
7358706,0.0233933674504906,0.0649803804045465,4.83355219373231  
"Foxe1",3.04083095002855,-0.0959149087315515,1.09017528023973,-0.08798  
11810725147,0.929891633460728,0.956530048494713,-0.00426275353473561  
"Ccin",0.679405716080242,-1.62064894974202,2.04341288641773,-0.7931089  
0154126,0.42771437703502,NA,NA  
"Olfr155",0.199757551976942,1.60202671877344,4.78340845099921,0.334913  
218301229,0.737690550614586,NA,NA  
"Hrct1",192.990552953628,-1.62778647686962,0.50235854478599,-3.2402882  
2394785,0.0011940893420052,0.00673449682104072,-8.13976610885449  
"Ccl19",779.694497751583,-1.14011639810664,0.556530840508487,-2.048613  
14974917,0.0404999577776156,0.0988444331891287,-2.63846654266278  
"Ndufb6",5316.38652841934,0.591453855434188,0.400863872748416,1.475448  
13998588,0.140092101064529,0.254496952068963,0.809384739677911  
"Sdr16c6",3.80670831050771,-3.40939452155786,1.5810287036626,-2.156440  
62227313,0.0310492755745934,0.0807413677185145,-8.57975571448425  
"Gm10309",4.94925974181274,0.67212868962755,0.829315483200193,0.810462  
005404644,0.417674693463641,0.560907347617129,0.388624501086983  
"Camkmt",320.519201921032,0.250274230568371,0.106780621149209,2.343816  
9573733,0.019087536349987,0.055464796386296,0.723794766364381



"Impdh2-  
ps", 2.67485375684729, -0.565953421377217, 1.35902195440963, -0.4164417061  
4085, 0.677086815420792, 0.782470289655915, -0.138827992686429  
"Rasgrp3", 918.285209313208, -0.617463202377269, 0.2219350605707, -2.78217  
961952239, 0.00539951471447071, 0.0210701770453112, -2.38334414541655  
"Ces1a", 1.10334459340652, 2.00005391937283, 2.31539159092941, 0.863808060  
462897, 0.387693339189153, NA, NA  
"Rpl7a-  
ps5", 1.25067372108221, 1.94164565709493, 1.43522992713527, 1.352846411843  
21, 0.176104702092339, NA, NA  
"Safb", 7751.92556402217, 0.197052597763562, 0.167950373650737, 1.17327871  
013461, 0.240684056951938, 0.379037052132209, 0.19116492542348  
"Zfp827", 1698.46760697902, 0.521266042663091, 0.270519912643752, 1.926904  
52088659, 0.0539915299979645, 0.123226835057979, 1.09138953550072  
"Treml2", 80.8016187000387, -1.43546180765758, 0.475326727842642, -3.01994  
75930434, 0.00252818427034558, 0.0119357232211134, -6.35653985960948  
"Ptges3", 7258.03135659656, -0.033312249216208, 0.144618059473135, -0.2303  
46398904601, 0.817822608691059, 0.883185002728234, -0.00413806705898971  
"Lrrc73", 79.4106396332455, 0.163042163191106, 0.39646385800405, 0.4112409  
23729901, 0.680895883171348, 0.785257263795684, 0.039414446814247  
"Yipf3", 2857.67279495128, 0.125210808674017, 0.232455687504927, 0.5386437  
73434725, 0.59013267738584, 0.713527397185242, 0.0422629607518032  
"Jund", 10782.6208356791, -0.0475497390524326, 0.223275013576358, -0.21296  
4891551428, 0.831354346977874, 0.892330627692681, -0.00541679762200688  
"Nr2c2ap", 1015.03991902636, 0.0473573272584972, 0.144184245464605, 0.3284  
50082086969, 0.742571381271012, 0.832298045069108, 0.00869313239003288  
"Trim75", 4.69058348644336, 1.24336482210545, 1.05086461768114, 1.18318268  
708018, 0.236736752879396, 0.37484921289934, 1.22002864590042  
"Gm10313", 0.0949220886599469, -0.0536251540817779, 4.78471990596623, -0.0  
112075847982054, 0.991057828330315, NA, NA  
"1700029J07Rik", 889.087717856566, 0.834287605959791, 0.263945483696927, 3  
.16083304125694, 0.00157318644329134, 0.00834460498122947, 3.993017331587  
01  
"Ccdc110", 0.128405942251645, -0.0640010143304913, 4.78471990596623, -0.01  
33761255806607, 0.989327714165651, NA, NA  
"SpX", 62.1033878669039, -0.309145401641353, 0.355920236966693, -0.8685805  
68152079, 0.385076586799244, 0.529643290731635, -0.196477834669453  
"Mboat4", 4.05245485060028, 0.334985179032822, 0.720985851468639, 0.464621  
016279947, 0.64220287932228, 0.755592067404406, 0.0938808163783056  
"Tex24", 0.260018680983686, -0.543629041003686, 4.78471990596554, -0.11361  
7735559796, 0.909540827451446, NA, NA  
"Rpl36a-  
ps3", 0.159179032621103, 0.853554329491959, 4.78471990596623, 0.1783917023  
9153, 0.858415365321949, NA, NA  
"Gm4799", 0.24755220893593, -0.534913098456694, 4.78471990596417, -0.11179  
6115335805, 0.91098506772832, NA, NA  
"Klrlh1", 0.259980857330119, -0.220360023442976, 4.78155456202554, -0.04608  
54353086432, 0.963242154614272, NA, NA  
"Gm6040", 0.187509570690825, -1.55459299704879, 4.76279207440393, -0.32640  
3708741232, 0.744118931885744, NA, NA

"Srsf3",10879.3244933309,-0.300965337578489,0.10222631861337,-2.944108  
14808629,0.00323886799911076,0.0143070793490398,-1.27820003092609  
"Arhgef10",1060.84575339445,-0.566865951645501,0.164318732080346,-3.44  
979506881981,0.000561012256522873,0.00377454001990441,-3.1628153991243  
7  
"Serpina1d",3642.99734521905,2.40709458003662,0.991145326980317,2.4285  
9903034625,0.0151572850603951,0.0465173354185246,7.38479823136482  
"Serpina1b",855.866794110687,-0.158366735271175,0.532661938965486,-0.2  
97311904016923,0.766228394239512,0.848859160845568,-0.0259502891384049  
"Serpina16",0.995035697013741,-0.649815944474643,2.0799934072617,-0.31  
2412501984861,0.754727050316448,NA,NA  
"Smim15",2150.38952057379,-0.199951110610207,0.170711590032464,-1.1712  
8023101526,0.241486155004946,0.380054649308777,-0.19344074696415  
"Wfikkn1",43.2261757999448,0.523671990135159,0.36783318413116,1.423667  
06628739,0.154542871577025,0.274283352449374,0.677418721277782  
"Ccdc78",13.060797956659,0.714995956689981,0.491469068012706,1.4548137  
4765074,0.145720831189253,0.262212939179172,0.957092415289744  
"Naip5",557.255071232905,-0.632584428698884,0.341995135167736,-1.84968  
838339944,0.0643584757613368,0.140679547129433,-1.24066929929621  
"Gm10319",0.0886915477092957,-0.544048378937457,4.78471990596623,-0.11  
3705376621746,0.90947135024012,NA,NA  
"Cecr2",492.906608390667,0.117512126479054,0.323325693550032,0.3634481  
54054202,0.716270135722911,0.811967157344495,0.0244772337750152  
"Timm8a2",4.8622796603996,0.103741064937317,0.881494826697977,0.117687  
661680245,0.906315143389054,0.942923678875182,0.00609685554036802  
"Npw",2.22593244983651,0.128242912894399,1.2686558624073,0.10108565821  
0774,0.919482462815599,0.950687721920594,0.00648519774250061  
"Syndig1l",0.220808477882297,-0.0605886012006049,4.14270639794808,-0.0  
146253669414311,0.988331061523137,NA,NA  
"Vrtn",0.0804673502708677,-0.544048378937456,4.78471990596623,-0.11370  
5376621746,0.90947135024012,NA,NA  
"2210408I21Rik",189.162749187922,-0.398515025658817,0.324298026372328,  
-1.22885430453184,0.219126436735005,0.354712052726017,-0.4130404750109  
1  
"Slc25a16",3108.65495701976,1.05470233552392,0.315265031027792,3.34544  
662973085,0.000821501675213673,0.00505607312604678,5.57638544152003  
"Zfp213",511.859712717205,-0.111067732374018,0.116054686600987,-0.9570  
2927324155,0.338552479896822,0.483172028475204,-0.0807887273010852  
"1700086L19Rik",0.383510420479959,-1.51173891727675,3.88101204832616,-  
0.389521830505202,0.696890164885802,NA,NA  
"Zfp946",899.163395988297,0.312545385132445,0.119970324019655,2.605189  
13895108,0.00918235553413218,0.0316656470117632,1.07907009201946  
"Zfp942",1035.2778372354,0.3332195260961,0.152103252422191,2.190745567  
82776,0.0284702095803538,0.0756327998847241,0.860327908044059  
"Zfp65",578.360248261234,0.0361991573041716,0.126379274116198,0.286432  
70470828,0.774546728790827,0.854292460604845,0.00570070425507611  
"Zfp58",471.158666647569,-0.184141979248157,0.117017023552749,-1.57363  
410602518,0.115572063647148,0.219945636833542,-0.278859985603255  
"2610044015Rik",1602.85837311944,-0.285272977832707,0.092822483844102  
8,-3.07331764911429,0.00211693020765063,0.0104363856355934,-1.30154568

320053

"Rps8-

ps1",1.31467744781803,0.174695565228547,1.3637252539777,0.128101730696  
119,0.898068466437044,NA,NA

"Gpr31b",5.00362000495886,-2.47728943683213,1.19608386752029,-2.071167  
00099637,0.0383431922479221,0.0949225594403144,-5.83325828480171

"Bves",16.8982203507386,-1.96184759303818,0.933913200982519,-2.1006744  
4273647,0.035669554291228,0.0897863374090323,-4.72868531642957

"Tcp10a",1.97052277102951,1.38558039879613,1.5727177001458,0.881010240  
215185,0.37831227748708,0.523181274306199,0.897616767365365

"Armc2",103.033392214969,-0.423545478727277,0.53703215466756,-0.788678  
061538913,0.430300193419927,0.572841593544606,-0.235976691122033

"E230015B07Rik",5.73467800045384,-0.809437887395586,1.06769302673634,-  
0.758118548240247,0.448380016676623,0.589078469453594,-0.4283511945796

25

"Mfsd4b3-

ps",590.289832271517,1.51413192166341,0.302951580440257,4.997933727439  
35,5.79478922023528e-07,1.77095298144432e-05,16.5667345993948

"Tia1",3863.81061145976,0.0335825772516157,0.155401931149885,0.2161014  
15234186,0.828908696580903,0.891010752359036,0.00387538857308681

"Trappc3l",0.521381832858575,1.46739176261564,3.64580238470934,0.40248  
8014372349,0.687324907430786,NA,NA

"Egr4",1.55023549806751,-2.3203606978669,1.82189122213361,-1.273600020  
50481,0.202805204982378,0.334882781736653,-2.53841593001812

"Lsmem1",11.6428565996414,-0.0507013519638524,0.500502732899448,-0.101  
300849388246,0.919311641949849,0.950561510035433,-0.00257068052195128

"Gm10327",2.50407334755143,1.44161087600345,0.97007291717867,1.4860850  
668795,0.137256621675784,0.250466037382726,1.99581215182331

"C1qtnf9",261.551716058144,-1.97059960086469,0.656033765582624,-3.0038  
0819440689,0.00266623354787069,0.0123894713337423,-8.6527220508689

"Setdb2",253.007557473143,0.195382054949258,0.177370585562333,1.101547  
10449775,0.270658615250077,0.413096021929237,0.172732432124397

"Reg3b",0.124117865206097,-0.949654955366437,4.78012969768763,-0.19866  
7194286763,0.842523087626157,NA,NA

"Tbpl1",1209.77448811112,-0.296847853561904,0.134037908913944,-2.21465  
595790881,0.0267836880030641,0.0722107783025089,-0.780165424106702

"Gm10330",35.0448734711518,-0.611605789156616,0.353366896814692,-1.730  
79537067488,0.083488267866953,0.171768940262726,-1.07740786260695

"Map3k5",3055.57856357126,0.123559936057053,0.16628577694449,0.7430577  
54712844,0.457446714729006,0.597431702061354,0.0636476145040805

"Hpcal1",1647.89027956319,0.108448734476073,0.213658779473739,0.507579  
116304941,0.611748539366071,0.731322686729592,0.0339336615848485

"Ect2l",8.05201696421126,-0.0627970945470739,0.860441198970442,-0.0729  
824357808687,0.941820094449224,0.963817152236969,-0.00231430393098084

"2410004P03Rik",31.5189970440572,-0.17244816598572,0.555682526638977,-  
0.310335772169705,0.756305630793101,0.841774546120265,-0.0297029998949

397

"Gm6736",0.376360808246515,-0.632838946206739,3.15760468186314,-0.2004  
17408120048,0.84115414596563,NA,NA

"Rpl23",25939.062477203,0.12614440101749,0.144859087814246,0.870807644

317389,0.383859190659289,0.528490785162746,0.080446057464485  
"Rps15-  
ps2",0.275505587434007,-0.543332972191678,3.96739004568715,-0.13694972  
4109512,0.891070534912864,NA,NA  
"Grid2",0.866736811528288,0.928763626302958,1.86959039263096,0.4967738  
5483136,0.619348534348375,NA,NA  
"Psmg4",535.313700982095,0.282423992209587,0.149302367831557,1.8916243  
3464028,0.0585410512429697,0.131154017825511,0.57371127899805  
"Dtnb",1340.80504310623,0.854002672366572,0.313576383815228,2.72342789  
96909,0.00646083163044449,0.0242116654104184,3.17767623872475  
"Ccnb1ip1",44.1019251570318,1.22954785269092,0.538758969804403,2.28218  
539570173,0.0224783969537005,0.0630170789077287,3.39889998634861  
"Zfp777",1290.66557606549,0.138842695295566,0.129114719148231,1.075343  
66500977,0.282220893608995,0.426106782065061,0.118441885792627  
"H2ac7",6.45919712713841,-0.395802055016452,0.866206985917767,-0.45693  
7038665291,0.64771630078252,0.759923727821022,-0.108662391448518  
"Ptgdr",0.63932398960245,-0.0964872734923402,3.15411633490038,-0.03059  
09051054034,0.975595795431338,NA,NA  
"Vmn1r209",20.8512665144803,0.155713335379605,0.380061032577668,0.4097  
06131469248,0.682021531705223,0.786153796822987,0.0374650700074683  
"Vmn1r208",1.27853520419737,1.12275156421543,1.61683716321518,0.694412  
269682604,0.487423701275071,NA,NA  
"Nutf2-  
ps1",2161.18963183668,0.222736893018738,0.107380796221485,2.0742711998  
458,0.0380541309764329,0.094399420582505,0.525708146205761  
"Tmem139",446.833607802669,1.15983753752435,0.309177875986564,3.751360  
06683334,0.000175877905001016,0.00153092294272759,7.51793295109052  
"H2ac13",2.90261721776403,-0.941184253107191,1.59513672365577,-0.59003  
3593452833,0.555168127792514,0.684628939073964,-0.356594273118774  
"Gm10334",0.0721532113593249,-0.544048378937457,4.78471990596623,-0.11  
3705376621746,0.90947135024012,NA,NA  
"Atp5md",9971.72716871797,1.04676625914646,0.298114997058796,3.5112834  
6266998,0.000445948603796949,0.00315611828560178,6.02771180354112  
"Gprin2",49.40711043006,-1.31324537378247,0.321880821227868,-4.0799118  
4057774,4.50527838923737e-05,0.000535633646544818,-9.89144311530427  
"Gm10335",12.1807647263557,-0.45303813454662,0.626230826962421,-0.7234  
36335359143,0.469411854580402,0.607540148729418,-0.225765672787211  
"Pcnp",5795.90457083724,-0.103646178982018,0.0811845878676726,-1.27667  
309404782,0.201717684314582,0.333591762617886,-0.113786641412776  
"Klrg2",130.464068853948,-0.652606111960191,0.366813903865435,-1.77912  
043432137,0.0752200192266374,0.158589958356507,-1.20173061724808  
"3425401B19Rik",1.20342966957865,-3.34218599902887,1.84945185134706,-1  
.8071224706902,0.0707431857530329,NA,NA  
"Nt5dc2",663.416163468405,0.816446090415162,0.326292382973236,2.502191  
69376728,0.0123427074889275,0.0397493998767156,2.63316971011871  
"Cfap44",89.9311319412198,0.374119546056836,0.608622085603916,0.614699  
260684255,0.53875334816974,0.669812533151446,0.149931179191479  
"Akr1c19",806.144737774749,1.24743933750263,0.483931217225518,2.577720  
33111332,0.00994544546174385,0.0336193300300072,4.23213015658557  
"Tigit",47.1011325145411,-2.1788454989988,0.627921630524532,-3.4699322

225589,0.000520589714253093,0.00357284697237128,-12.2764708030369  
"Cpa2",2.50088100983915,-0.145510457820956,1.01281109685816,-0.1436698  
88957916,0.885761149606441,0.928725042752548,-0.0107594150565875  
"Cstdc5",1.32013544428525,-1.20321645670739,2.32670658997738,-0.517132  
870079285,0.605063409389586,0.726046301697221,-0.385199508940238  
"Stfa1",0.875190295028274,-0.293202481030016,2.15157014059962,-0.13627  
3726567103,0.891604893266153,NA,NA  
"Rnls",80.6349456876967,0.185296391612397,0.340571336151562,0.54407512  
3016037,0.58638977856464,0.709974410236795,0.0634688969681316  
"Gm10337",0.168733443545849,1.52134930970964,4.76404184136562,0.319340  
039480751,0.749468673713961,NA,NA  
"Fam189a2",507.425595161056,-0.78286492713411,0.239881285785189,-3.263  
55148786036,0.00110025190382108,0.00633010080280418,-3.96320603149951  
"Gm10340",0.534466438770599,1.59048525211913,4.72899100534176,0.336326  
554718027,0.736624627304221,NA,NA  
"2510002D24Rik",1497.29134113225,0.630303034761432,0.208885052508782,3  
.01746356281253,0.00254899683060763,0.0120078135306083,2.7873246391561  
9  
"Gm4952",75.3082340794421,1.27477795203675,0.578614049101613,2.2031576  
2124344,0.0275836410870173,0.0738163373476069,3.32229468232199  
"Rimbp3",5.60767075169025,-1.56777613676115,0.807643454095237,-1.94117  
358199535,0.0522372263355791,0.120236269518489,-3.3210147962758  
"Cebpd",1488.3070152369,-0.591270936261327,0.268517531022853,-2.201982  
61919444,0.0276665362300428,0.0739772522508741,-1.53966811969881  
"Eef1g",14754.6422598393,-0.180098817873261,0.207685788126789,-0.86716  
9677317128,0.385849047855018,0.530107436237116,-0.114304322248881  
"Tut1",1530.12350571516,0.104047555260812,0.16822632344474,0.618497468  
946885,0.53624746571775,0.668013869573517,0.0419776056500053  
"Mta2",5081.15456531438,-0.322052956474348,0.109336574384658,-2.945518  
99295225,0.00322413352684219,0.0142686851402946,-1.36862458232735  
"Em13",2265.11176731621,-0.18237834287154,0.149396439011733,-1.2207676  
7075564,0.222173997678449,0.358012281548298,-0.187336842917443  
"Rom1",339.970662921953,0.00584184254406186,0.191835651073988,0.030452  
329957213,0.975706310914105,0.984797683518129,8.94915151233248e-05  
"B3gat3",3358.12414084265,0.00709770362265426,0.119751470463784,0.0592  
702836563565,0.952736829697416,0.970455684120793,0.00021285686919436  
"Ganab",8113.18301190315,0.132344097046702,0.0953414111070367,1.388107  
17724876,0.165104411388509,0.28784029088458,0.164814654847251  
"Ints5",891.17370637636,-0.400231409242716,0.108442507226066,-3.690724  
41684118,0.000223616303109412,0.00184670507328561,-2.51919747901172  
"1810009A15Rik",1219.46913006061,0.0350529351636066,0.178767030282673,  
0.196081655035494,0.844546254700022,0.900424479119698,0.00367666673380  
682  
"Uqcc3",1875.22289662054,0.526367959899003,0.226625000161968,2.3226385  
4174433,0.0201985784031808,0.0579164531919441,1.49949270969925  
"Ubxn1",7385.9165351742,0.22988791187355,0.176794091756787,1.300314448  
23282,0.193493218096023,0.323700623460854,0.259298895906984  
"Lrrn4cl",72.8457977431928,-1.97389077336566,0.5897782628908,-3.346835  
40843067,0.000817397275030338,0.00504195256834594,-10.4418069021138  
"Bscl2",5221.29396650307,-0.54487916153762,0.465369512577101,-1.170852

72415078,0.241657980714797,0.380171640146612,-0.526970314988648  
"Gng3",11.3246120666552,-0.735745715761379,0.8778874725666,-0.83808658  
7123001,0.401982075402418,0.545887066875355,-0.445378637900723  
"Hnrnpul2",10263.4308649662,-0.141777026372394,0.1100539771966,-1.2882  
4991139687,0.197658982840036,0.328667478033006,-0.157756536998231  
"Ttc9c",1453.02706863217,-0.0668604788772745,0.136519194848755,-0.4897  
51488436092,0.624309762471315,0.741734001995496,-0.019975543422817  
"Zbtb3",83.6903043697633,-0.53093514495136,0.199494927022233,-2.661396  
72259529,0.00778172093972516,0.0278763732154262,-1.90073496343651  
"Polr2g",1616.58305040747,0.116219396818761,0.223589744558818,0.519788  
584436562,0.603210936674742,0.724670785168461,0.0374270408073916  
"Foxr2",1.86055826981131,1.35529378026752,1.24374870767085,1.089684573  
66726,0.275852113733542,0.419283170687294,1.1780332292959  
"Snx29",727.466792404786,1.18125880343681,0.365515576924281,3.23176049  
944792,0.00123030126225867,0.00689520379750492,5.8790414444398  
"Gm10343",3.70138867543904,-0.471192425263443,0.806825693563368,-0.584  
007709499692,0.559215125162171,0.687792626658172,-0.176352200076172  
"Rtl4",18.965664742846,1.21022104070495,0.480276346551771,2.5198431057  
3265,0.011740715351372,0.038415920107577,3.94445325047906  
"Gm960",26.3965940761726,0.28431780544562,0.537955101146064,0.52851586  
4688162,0.597141338834182,0.71937360670923,0.0936470169030235  
"Sms",1854.68325038731,0.993160419465436,0.203504164811314,4.880295301  
99678,1.0592710939621e-06,2.92399786079693e-05,10.3685686140946  
"Mpst",3630.96537447516,1.04816050411502,0.31629002719992,3.3139220777  
6598,0.000919971412761542,0.00551586796003215,5.45056695896503  
"Csf2rb",1499.66705787471,-1.65922126226476,0.285685939209342,-5.80785  
063085984,6.32799311950906e-09,5.65497425832413e-07,-23.8688271765917  
"Csf2rb2",742.548492589736,-1.38364933396223,0.27727359690473,-4.99019  
506151409,6.03183511233063e-07,1.82339102356934e-05,-15.0986963092671  
"Ncf4",593.560685016541,-1.06400305061176,0.457125086781397,-2.3275971  
5311922,0.019933504762963,0.0573249964407452,-3.04200441887165  
"Apol7e",224.228459501418,-1.1285967855045,0.342755766374319,-3.292714  
21876525,0.000992252759368779,0.00583794336215222,-5.80479841949218  
"Tmem28",123.443688368641,1.95086655548233,0.633936979164702,3.0773824  
837492,0.00208827160126329,0.0103107418793192,8.924373719125  
"Spin4",72.604188809115,-1.45805751583694,0.324525798686169,-4.4928863  
0284507,7.0264302589681e-06,0.000128557795264438,-13.0629297277808  
"Gspt2",284.438575014314,-0.136402426352232,0.250763187937327,-0.54394  
9163648067,0.586476455985314,0.71003526475018,-0.0467097343846698  
"Smpd5",136.624549028414,-0.872913690901278,0.475667929956931,-1.83513  
252823312,0.0664860553096369,0.144230652695516,-1.69025901086285  
"DXBay18",4.89278132162391,-0.736100010794794,2.43009327447218,-0.3029  
10188068676,0.761958306945553,0.845714297764239,-0.123350992008116  
"Gm14698",105.351758303794,0.127847539560061,0.312815871870696,0.40869  
9017717704,0.682760554736408,0.786556295199437,0.0306950413431046  
"Zhx2",1414.67486338918,-0.385248753029668,0.183856316035229,-2.095379  
48620623,0.0361372716119093,0.0906542310099544,-0.92486770952697  
"2610005L07Rik",1606.13558509549,-0.316727668796743,0.214039039625911,  
-1.47976588453353,0.138935736028322,0.252796657435631,-0.4355543372953

"6820431F20Rik",5308.41522877906,-0.309074893414954,0.165415989595261,-1.86847047961444,0.0616965211492439,0.136374421195778,-0.615785697402091  
"Ssxb5",1.56649811394391,-0.755739720512627,1.43209586764098,-0.527715872651402,0.597696554828132,0.719864563965589,-0.248405744008927  
"Apcdd1",622.144476857704,-2.57488130647411,0.517181023310289,-4.97868481328496,6.40177960193035e-07,1.92329581939042e-05,-27.9603404538735  
"Ccdc112",531.706006029096,0.194380733586419,0.378526494870794,0.51351949261245,0.607587979090063,0.727955660335385,0.0617188255994929  
"Mcc",954.756484876825,-0.497007356278867,0.199357023208778,-2.49305165315582,0.0126650420372437,0.0405090206105934,-1.59352019340315  
"Gm94",0.728465203776911,3.77388974475315,2.74981801930382,1.37241436279067,0.169934481424391,NA,NA  
"Lrrtm2",2.48721608870852,0.0393437775589089,1.32571222799045,0.0296774644815242,0.976324284742613,0.98508443949892,0.00059125498839508  
"Ppia",41796.9307225588,0.309280072874655,0.162083800782341,1.90814918814732,0.0563719367728997,0.127495652847465,0.637015818717023  
"Gm6304",2.02195524043331,-2.40972779052902,1.64560508472518,-1.46434148320066,0.143100668026416,0.258637080569063,-3.25874581725805  
"Vmn1r4",26.3568123290282,0.49165324133131,0.547936232728316,0.897281858663082,0.369568534310539,0.514556361181584,0.326679086748041  
"Fndc1",339.198153670601,-1.62555576851295,0.541144048336534,-3.00392432201718,0.00266521610541882,0.012387695738607,-7.13789922270063  
"Vmn2r121",0.263966273192378,-1.04620271350415,4.78078017908052,-0.218835142866862,0.826778470243954,NA,NA  
"6720489N17Rik",173.905366642356,-0.433524022989545,0.216229791769636,-2.0049227233748,0.044971309023492,0.107135846616353,-0.96834425267607  
"Ccnf",134.134466045572,-0.531144739987549,0.34144399729874,-1.55558376831804,0.119807100946001,0.226268777048153,-0.789297924823103  
"Ang",319.028297554939,-1.245884834926,0.291431029443134,-4.27505896440279,1.91086715344531e-05,0.000278877902379316,-10.1972390804864  
"BC061237",18.8345926910039,-1.21470752491233,0.691790198418697,-1.75589004829633,0.0791071845417627,0.164877806969031,-2.18957183040161  
"Gm10354",12.9573056698286,2.77465597244652,0.847308716198116,3.27466945565772,0.00105785672284673,0.00615153306950954,14.1259232446238  
"Sept5",727.990648507908,-1.68330826709805,0.336647861625523,-5.00020484006671,5.72694376116722e-07,1.75972959378397e-05,-18.428463848565  
"Tuba1a",6157.7703494506,-1.66748444564846,0.242450757069127,-6.87762111286388,6.08602762171455e-12,2.75965968763233e-09,-32.8630476951005  
"Trim6",115.095471543334,0.0613793777916039,0.326902232189321,0.187760656697067,0.851064278578415,0.90524528414827,0.00611027653629076  
"Rpl31-ps17",0.520147759709394,0.303757572609441,2.29292591700936,0.132475964598817,0.894607832925079,NA,NA  
"Taf1a",651.411471081644,-0.102936958794896,0.140476025813951,-0.732772430017547,0.463697239291945,0.602624059968963,-0.0521336298360416  
"Klf12",253.109192388503,0.125972660975428,0.272897320142927,0.461611938546893,0.644359631666733,0.757352709520644,0.0350111033948434  
"C2cd6",2.52667330221808,1.35723193270776,1.37986679927493,0.983596339458949,0.325314025686942,0.470200337231707,1.02416236522286

"Gm10355",0.100532412451372,0,4.78471990596383,0,1,NA,NA  
"Dppa2",8.55533664241187,0.30716598016341,0.630553728277552,0.48713688  
6816097,0.626161327624208,0.742904561641524,0.0912859488673109  
"Gm10357",0.426146230277328,-1.34571859286432,3.12375600472945,-0.4308  
01442502828,0.666612750620651,NA,NA  
"Psmb11",6.11139212121403,0.84536629048515,0.696397418902057,1.2139135  
8948165,0.224780722998879,0.360946048261288,0.861450891126708  
"Nanos1",46.0743251442698,-0.891023219504976,0.414227010972287,-2.1510  
5050106109,0.0314722138434449,0.081504213775998,-2.23388481018717  
"Atp5l-  
ps1",0.402335125235068,0.846085295045606,2.27802512917084,0.3714117479  
26401,0.710330876790998,NA,NA  
"Gm9008",0.365443222765953,-1.09559719357591,3.83240836112773,-0.28587  
6944818458,0.774972372525084,NA,NA  
"Xlr5b",2.38835849851892,-3.93710491775487,1.62679962401775,-2.4201535  
7000839,0.0155139537314212,0.0473307885863324,-12.0105097172749  
"Mroh5",1.01656093851654,-2.0262525075825,1.94788751161102,-1.04023076  
050561,0.298232703578062,NA,NA  
"Gm10364",5.79177098698422,-0.372489090711498,0.716716567607838,-0.519  
716032175372,0.603261511026341,0.724686891873057,-0.119947294571091  
"Ppp1r3e",313.870910300364,0.329608043695639,0.138463277316342,2.38047  
264288419,0.0172904448425153,0.0514386776837601,0.978067341391881  
"Phf20l1",4573.47118242052,0.230002918544349,0.163114334998362,1.41007  
176681718,0.158518492887883,0.279507467383609,0.293190762400965  
"Hhla1",0.204761310506594,1.36985166703191,4.78471990596527,0.28629714  
8830817,0.774650541681034,NA,NA  
"Gm525",14.5276442334022,-1.66597289899453,0.652959329591565,-2.551419  
09073666,0.0107285231124504,0.0358438560052361,-5.54532924869773  
"Lratd2",2175.38952288888,0.130814002254081,0.188733427757667,0.693115  
172061864,0.488237277000955,0.624817047200478,0.0615213538819286  
"Tmem253",65.3726652638918,0.3479215209389,0.296607867939378,1.1730016  
5823656,0.240795140716111,0.379181364374313,0.337393643392144  
"Slc39a2",173.654497598411,0.201365025162857,0.22836611591834,0.881764  
023323242,0.377904430661841,0.523058907526772,0.130496857300932  
"Gm17184",1.02762014198014,2.84734993445031,1.83581331625358,1.5510018  
9613017,0.12090122956095,NA,NA  
"Eddm3b",63.7688511070067,-0.964471237124111,0.565769872483248,-1.7047  
0589550996,0.0882492897706617,0.179331386341674,-1.65746297961921  
"Gm16020",0.607478954081298,-0.563524591681315,2.24253579024498,-0.251  
289006905773,0.801590673763299,NA,NA  
"Ptrh2",933.683898092731,-0.146613192752778,0.159457886229503,-0.91944  
7737703998,0.357861429687178,0.502990600604612,-0.100750210299618  
"4930503E14Rik",5.67534832102698,-0.667412587266171,0.990096381889516,  
-0.674088502366275,0.5002550488248,0.635562190785558,-0.30250163966426  
8  
"Ear2",577.464907439485,-1.78750238923478,0.480085009154486,-3.7233039  
0482903,0.000196632595820666,0.00167274971784963,-11.4280148383568  
"Slfn2",2135.24975388957,-0.896168892264038,0.3573316707695,-2.5079470  
0154669,0.0121434879335457,0.0393151003908917,-2.9001339137627  
"Slfn10-



ps",79.0688051400537,-0.90655862752992,0.392917585109187,-2.3072488020  
0513,0.0210409539029503,0.0598390488914419,-2.5529568859318  
"Zfp9",447.625498828338,-0.589072701576722,0.251191029837345,-2.345118  
38244449,0.0190210391534977,0.0552962906537794,-1.70539460040856  
"Gm5460",2.96302935885198,-1.96905797357068,1.62132743809079,-1.214472  
73839353,0.224567253926675,0.360765618938972,-2.00750734827253  
"Gdf2",1.16947135570113,-1.076767158693,1.58795291330929,-0.6780850676  
79379,0.497717757927104,NA,NA  
"Lym9",1011.83847466559,-0.166337951013588,0.38356034100291,-0.433668  
273885297,0.664529348370701,0.772651756259624,-0.0429030222884484  
"Adam1a",650.232526640478,-0.415008526908029,0.186983040850948,-2.2194  
9822304393,0.0264528479770536,0.0716357819245265,-1.09402911995271  
"Zfp783",228.354923163416,-1.00866061790623,0.27012211838734,-3.734091  
17301482,0.000188394243313022,0.00161819865908251,-6.48209864318829  
"Mansc4",177.766805708005,0.907122750687739,0.368619864754526,2.460862  
36099028,0.0138603527711628,0.043602639292051,2.84168683320717  
"Spef2",71.1759382436891,0.272882722817307,0.443222244482208,0.6156792  
1333935,0.538106259079026,0.669345827082798,0.109549975503846  
"Ugt3a1",3725.99897968093,1.64403478682632,0.351421604003241,4.6782405  
1822139,2.89347029090632e-06,6.43293999225672e-05,15.8673915531839  
"Duxbl3",0.554159295479682,-1.33942124025219,3.09761909568607,-0.43240  
3468237122,0.665448197841256,NA,NA  
"Plac9b",1441.02641609678,-1.35249846635875,0.354918624607273,-3.81072  
835457796,0.000138557955541819,0.00128220361516582,-9.00652411931392  
"Duxbl2",58.0913724072043,-1.36077861284599,0.393005890702522,-3.46248  
910013413,0.000535203592158615,0.003650986037486,-7.63772104631642  
"Tmem254a",1353.18853445808,0.249166324950865,0.244162631493226,1.0204  
9328116689,0.307494574147535,0.452253843760175,0.197716383018955  
"Tmem254c",2202.04884049809,0.334268260107238,0.507932181524614,0.6580  
9624250209,0.510476290186893,0.644683380145349,0.146742417817339  
"Rpl37rt",869.589923412582,-0.661585970711873,0.323962252297351,-2.042  
16993189883,0.0411346779556286,0.100017951213224,-1.52323924184529  
"Gm10401",2.99651690991056,-3.36325826925962,1.52619104857792,-2.20369  
413933691,0.0275458616041061,0.0737374567740001,-8.76883620711777  
"1500011B03Rik",752.876397442675,0.0897604152338816,0.201341423373184,  
0.445811963231787,0.655733079456416,0.765529958651212,0.02398280965564  
"Smim10l1",4802.86356221441,-0.264631267307398,0.302958913733686,-0.87  
3488962731165,0.382396619634388,0.527258983779881,-0.169380794211551  
"Olfr31",26.4630145551834,0.580159962520685,0.353898015305358,1.639342  
23259235,0.101142005171749,0.19911821656288,0.936294971549536  
"Olfr381",3.52891243483251,-1.08952822489001,1.38964993202434,-0.78403  
0711463331,0.433022089904323,0.575140647748943,-0.602662365015953  
"Olfr380",0.212355555277396,-0.0733444351575391,4.78471990595936,-0.01  
53288879180135,0.987769795962783,NA,NA  
"Klra10",1.45588617294469,-3.75805140364248,1.55139477309822,-2.422369  
51471575,0.0154196623292724,0.0470873259351846,-11.4836708477065  
"Myo18b",64.5083561192065,-2.9516058298116,0.709359981446443,-4.160942  
12672251,3.16937401453864e-05,0.000406939432251913,-23.0427327525302  
"Klra14-  
ps",1.85796970152996,-1.58693676154671,1.34635265081077,-1.17869323508

299,0.238520350374688,0.376663950077401,-1.54948801861608  
"Gm10044",5.55652518442928,-0.535384822406044,0.768434139744515,-0.696  
721807003584,0.485976908842325,0.623024378237074,-0.253327838627264  
"Gm3715",2.49259428798228,-0.316602869840294,1.16527588938095,-0.27169  
7777947236,0.785854409986628,0.861545644414915,-0.0471824524787664  
"Gm10408",4.2401681372574,1.33987071589731,1.1388624640027,1.176499145  
63707,0.239395473629938,0.377617744910325,1.30486371523971  
"Lrcol1",1.06135629159526,1.29511870273619,2.71161370608549,0.47761917  
5559425,0.632921280198387,NA,NA  
"4930522L14Rik",250.834931863743,-0.0279395806628733,0.186524063538608  
, -0.149790756928744,0.880929701982533,0.925700206373237,-0.00215707107  
746468  
"5430403G16Rik",206.931998341815,-0.164962684444246,0.152457323722179,  
-1.08202531972066,0.279241277401912,0.422979087640195,-0.1419392614761  
4  
"Gm10418",2.38804160668668,1.039930840916,0.958926371689215,1.08447412  
816908,0.278154632076697,0.421763668732518,0.897782848721558  
"Acrbp",1261.38427006976,0.112090862884743,0.268983097651841,0.4167208  
41804817,0.676882607931732,0.782369095919354,0.0275103102897457  
"Grcc10",5984.79883129705,0.392351498427815,0.291224362783263,1.347248  
19956019,0.177900309169574,0.30472636635231,0.466247397324912  
"Zfp951",194.452711520286,-0.757684675807851,0.185850972411334,-4.0768  
3998623859,4.56518857950148e-05,0.000540449586661322,-5.70014455292555  
"Vmn2r27",52.3354377304956,0.251067252012057,0.530886494736663,0.47292  
0774028343,0.636269703276154,0.750876811189835,0.0719342007220138  
"Vmn2r24",45.54638501421,0.0799474609218067,0.257301629622083,0.310714  
941989412,0.756017337073233,0.841767671021623,0.0137710483165951  
"Gm10420",1.84126038319113,0.00699132479935167,1.16530181209826,0.0059  
9958287781515,0.995213054168233,0.996930467424169,2.14931030114225e-05  
"Abcb5",0.732300871995313,-0.835028355967307,2.45784926263764,-0.33973  
9449713525,0.734052750347751,NA,NA  
"Ahnak2",503.674729051492,-1.65171428660751,0.406950299374844,-4.05876  
169435155,4.93336265265157e-05,0.000573246156146605,-12.328718083781  
"Cep170b",3689.2307311593,0.506367258518859,0.198526921719474,2.550622  
62655931,0.0107530688259362,0.0358988216718608,1.68470959585931  
"Tmprss11a",14.0612523125661,-3.75301170531697,1.42600722569541,-2.631  
83217987327,0.00849258010036307,0.0297820731649063,-13.1875150696329  
"Serpina1e",37.7600348463907,0.307061709039456,0.719093642753494,0.427  
012131359805,0.669370491684015,0.776313695387516,0.0777475929543298  
"2310040G07Rik",11.0739377127961,-0.00760122865380342,0.57414937940037  
5,-0.0132391132456538,0.989437024512845,0.992978528091061,-5.356006955  
13672e-05  
"Rybp",1933.88998799709,-0.0761637152921679,0.151969719919776,-0.50117  
6914271963,0.616246620007545,0.735162804677183,-0.0234327800887506  
"Gpr27",277.807719661282,-1.18091193714484,0.271985971709349,-4.341811  
93141383,1.41312471748549e-05,0.000222561435715121,-9.9318323787971  
"1700123L14Rik",1.90775410440127,-2.73786826216804,1.81546127374041,-1  
.50808408957531,0.131533006734315,0.242129018627802,-3.88307628372685  
"Nfxl1",1111.74809978389,-0.117058333726675,0.174273912608109,-0.67169  
1660414512,0.501780011604455,0.636918603363301,-0.0528065844234189

"Gm10434",3.51332601067448,-1.29774328780467,1.03093302609217,-1.25880465069964,0.208100900124091,0.341343598100406,-1.3948997344153  
"Gm12258",462.81165681033,-0.131886043335781,0.169506110595243,-0.778060701603294,0.436533228774856,0.578543018940467,-0.0721736312162419  
"Noxred1",62.5102574883078,0.336593309181749,0.283606947339013,1.18683026752303,0.235294577359461,0.373202466609375,0.331757877249896  
"Trpc5os",0.979285855032912,-0.0358052056188743,1.96481202960263,-0.0182232219059223,0.98546077730924,NA,NA  
"Gm10443",297.834391672181,-0.317153829492165,0.585231860152856,-0.541928509171267,0.587867756170114,0.711322173873953,-0.108032053120472  
"Sod3",13443.1258730877,1.37846019920343,0.375688504106637,3.6691572516474,0.000243351362927334,0.0019671799592104,8.58939813504046  
"Nup62cl",7.89821920982255,-1.19532706111109,0.737994742494133,-1.61969590334932,0.105297616655959,0.204981322839246,-1.89439785081203  
"Ripply1",3.6043305332492,0.262447474568961,0.919733899273673,0.285351529150138,0.775374838512153,0.854721712824309,0.0411988326817708  
"Ptgr2",4918.14526702289,0.206314881870714,0.421266434246007,0.489749158961551,0.624311411066761,0.741734001995496,0.0616395806728598  
"Acot1",1985.4280757193,1.40289352474905,0.523036296732569,2.68221064869301,0.00731373907427511,0.0266448977454585,5.08571012450327  
"Tmsb15l",116.70285371655,0.287844657202321,0.327473721928931,0.878985512201767,0.379409131237809,0.52425194818757,0.185885155481352  
"Bhlhb9",629.136007747507,-1.11216374582273,0.274579098534316,-4.05043119363193,5.11233407824919e-05,0.000588068177193943,-8.27301649888376  
"Gprasp2",321.546851566586,-0.603291566923112,0.221793596107683,-2.72005854772384,0.00652703585664151,0.0243979198330699,-2.24017687708106  
"Gm17728",1.36920188202504,0.373494329486884,1.75141103599411,0.213253383592439,0.831129331680129,0.892267355417859,0.0425744189877909  
"Armxc5",321.870254363046,-0.113144871909467,0.180412107691014,-0.627146777217673,0.530563027011323,0.662795867546564,-0.0465351539079026  
"Adam4",81.0653292628011,-0.14574356296053,0.240633526402795,-0.605666072966784,0.544736517339596,0.674788617274026,-0.0573290753292822  
"Gm4787",60.2907685975342,-0.198486209780794,0.206600391537127,-0.960725235339765,0.336690339259925,0.481183627859709,-0.145193916694393  
"Oip5",42.6828069171444,-1.13725334099935,0.473555211346837,-2.40152217471093,0.0163270194809383,0.0492716647329104,-3.42359441208798  
"Vamp5",1796.59327609801,-0.525683346885201,0.179662743038904,-2.9259452349081,0.00343411384708432,0.0149929135222682,-2.20796342950874  
"Tent5d",0.10500178835157,-0.544048378937457,4.78471990596623,-0.113705376621746,0.90947135024012,NA,NA  
"Gpr174",97.9402464944677,-1.25458169093585,0.355285562272306,-3.53119243830766,0.000413690654897554,0.00297753428910761,-7.29747481312109  
"Gm5127",7.02505856734548,0.183952759352584,0.585448717355323,0.314208151626948,0.75336295188612,0.839720296103966,0.0321340496102446  
"Uprt",47.4358322967625,-1.16778918712246,0.442997807782415,-2.63610601814995,0.00838635247981879,0.0295157221392611,-4.11392535556568  
"Gm1070",8.85609020890114,-1.26235250006814,0.677337635531299,-1.86369756211459,0.0623641879508814,0.137429581449625,-2.50531984551628  
"Igkv4-71",0.329185624347197,3.2118292588323,4.69556163413782,0.684013864386649,0.493966411019868,NA,NA

"Atoh1",0.389469994667899,-1.8768504800066,4.73707422560677,-0.396204574938067,0.691954116584097,NA,NA  
"Zxdb",447.717213826658,-0.620713989745824,0.216195439752945,-2.87107808774847,0.00409074458398377,0.0170860383883816,-2.52599161955191  
"Hbq1b",0.709285491826252,1.0701658464572,1.98068667924025,0.5403004208963,0.588989868172708,NA,NA  
"Cfap47",27.2775554079912,0.867455644819605,0.600897360114325,1.4436003590606,0.148851423877489,0.266486554289164,1.14715066053877  
"Srp54a",3442.85784751049,-0.467020475214372,0.210104983319855,-2.22279580348362,0.0262295721989022,0.0711101499908502,-1.23458039318819  
"Smim9",3.70235560951064,-0.157968414957963,0.975715048874128,-0.161900152242442,0.871384482928505,0.919336326396839,-0.0132856576660858  
"Lrrc61",931.7359831109,-0.358798367874095,0.312687330648463,-1.14746691888669,0.251188697777001,0.391157034522479,-0.336784716249248  
"Drc1",27.0823979863234,-1.26409365584899,0.511791672532535,-2.46993791359242,0.0135136503948718,0.0427231812196955,-3.9857045142893  
"Olfr446",46.2210229386068,-0.0997335700014262,0.336556960224137,-0.296334890637848,0.766974342985305,0.849540745300658,-0.0162624936067601  
"Speer4a",0.218485588243121,-1.19910335393491,4.77612443304502,-0.251062000319456,0.801766174477112,NA,NA  
"Xlr3b",665.156037490703,-0.244262941511614,0.581363327071105,-0.42015540048287,0.674371933410229,0.78016518082548,-0.0606381803169056  
"Gm1141",11.2278062162418,-0.321973497179124,0.506934363228216,-0.635138433166692,0.525338132840646,0.65797014208407,-0.134776729630043  
"Vma21",1979.23615750489,-0.0365919812469389,0.272016465323117,-0.134521199676177,0.892990448526578,0.93382853574598,-0.00250517625393005  
"Tmem185a",1101.21569660959,0.0237499770592113,0.164716545161472,0.144186954843723,0.885352841829112,0.928396779067657,0.00176453005130192  
"1810058I24Rik",3477.43027415883,0.496899410412343,0.157879055509076,3.14734217791021,0.00164762024230184,0.00865444490420291,2.36011429886963  
"9030624G23Rik",53.0354585357507,-0.797204248009604,0.22398998976465,-3.55910658707222,0.000372118499128709,0.00273898319970237,-4.70363941007294  
"Zfp449",190.629053740118,-0.58449329942492,0.247499692641621,-2.36159202133339,0.0181966552292517,0.0534338828499583,-1.71216219782615  
"Gm773",5.19726135154893,4.20508908995958,1.26343819405563,3.32829030319342,0.000873807599165767,0.00531230678977397,22.0251175550291  
"Gm10478",88.9732638130898,0.223659953955897,0.381721346476486,0.585924669973033,0.557926138121786,0.686782595104151,0.0840374302261711  
"5730507C01Rik",156.118570088806,-0.313203713750811,0.223222070703263,-1.40310370190573,0.160585917439822,0.282222990707839,-0.396220792715959  
"Bnip3l-ps",0.175012171185054,-0.86895767294621,4.78232165718814,-0.181702055034318,0.855816553137226,NA,NA  
"Ccadc160",321.323822733884,0.657724793283071,0.320973286971766,2.04915742206586,0.0404467240095428,0.0987515933806744,1.52273006859984  
"Speer4c",0.52771470581906,1.24166262082678,3.68482976984791,0.336966073979051,0.73614247502256,NA,NA

"Klf14",0.292664219102447,-1.62726410037658,4.75983394023588,-0.341874  
132755131,0.732445617064549,NA,NA  
"Gm8773",16.1575137207627,-2.28396654721341,0.738800446137245,-3.09145  
258256804,0.00199179791541436,0.00995796814224338,-10.5276748165934  
"Gm10490",0.526409275526632,-0.108036059973208,2.60647024790289,-0.041  
449182111375,0.966937804806137,NA,NA  
"Nudt10",72.4471258719674,0.161279596533714,0.339015400519097,0.475729  
410188342,0.634267165509914,0.749057613150352,0.0466000263596338  
"AU022751",0.282774071718944,0.888024687372606,4.78471990596586,0.1855  
95960646592,0.852761621468831,NA,NA  
"Nudt11",99.9304270182868,0.623254252907355,0.260792982678958,2.389842  
8803761,0.0168555819689162,0.0504064627653263,1.86205677000319  
"Lrrc30",0.0823857475307038,-0.0662335070756759,4.78471990596623,-0.01  
38427135500841,0.988955465306843,NA,NA  
"9830107B12Rik",1.78920224513113,0.38737876987511,1.24810457507945,0.3  
10373647857552,0.756276831292437,0.841774546120265,0.0667233049138666  
"Trim40",2.81405825959396,-0.935768237756458,0.953336441572412,-0.9815  
71874261958,0.326310809313945,0.471219683010169,-0.704100914329347  
"Trim10",5.52005228743686,0.830742762816211,0.873234477663926,0.951339  
856665544,0.341431880482495,0.485937530101761,0.599526451355452  
"Gm8909",1.71602931891965,-3.2317988941898,1.81143064764763,-1.7841140  
6386808,0.0744051324464199,0.157314169642192,-5.97724564161324  
"Gm10499",41.7117430432137,-0.373776716598939,0.354054054737575,-1.055  
70522805051,0.291102907885011,0.434736864119327,-0.311361365257268  
"H2-T-  
ps",58.7524871328161,-0.925746074613598,0.422009827589379,-2.193659991  
05206,0.0282598621286031,0.0751514991521417,-2.39606155015303  
"H2-  
Bl",27.837312700525,0.576945462857742,0.327536022828543,1.761471785226  
38,0.078158584397451,0.163389737169669,1.04520415466919  
"Gm6034",2.53119800130893,-2.22580837784825,1.31727178019969,-1.689710  
81845451,0.0910832925238051,0.183692804885101,-3.77161105153256  
"Muc13",4.56957734891467,-0.464097014198149,0.916289489022245,-0.50649  
6058023516,0.612508456287956,0.731872158395794,-0.144867617181373  
"H2-  
Q6",7383.4797178563,-0.859703598484555,0.297304425959511,-2.8916609489  
0776,0.00383211252800007,0.0162511195105709,-3.54162933872385  
"H2-  
D1",42418.9729195477,-1.33149436771034,0.2364113019622,-5.632109618529  
32,1.78018468372016e-08,1.26218330775184e-06,-18.0852453447808  
"Lst1",373.282357123201,-1.17310385406939,0.405232948392409,-2.8948876  
4110416,0.00379294270708708,0.0161351356379485,-4.84111342362328  
"Ly6g6d",139.101588711175,0.794370761502237,0.286777400828138,2.769990  
79846704,0.00560578762962281,0.0216310404121087,3.04532035707619  
"Mpig6b",26.7385280040889,0.786604162488951,0.3456134250626,2.27596529  
951484,0.0228480865920418,0.0637966479123059,2.16477762780427  
"C4b",3138.85954838771,-0.852797925956663,0.385859550275544,-2.2101252  
2651746,0.0270964725398897,0.0728626426124355,-2.23363060510123  
"Btnl5-  
ps",1.72485870337344,-3.87717282529006,2.31672089510191,-1.67356060606

494,0.0942169861422688,0.188608089918065,-6.46745001372887  
"H2-  
Ab1",27996.9972423509,-1.3007662336803,0.436835977907553,-2.9776994099  
9589,0.00290420654982155,0.0131965088110978,-5.62945996728957  
"H2-  
Ke6",4928.25599619843,0.684605650029349,0.209150642089505,3.2732658297  
8586,0.00106312441032949,0.0061747988539185,3.48277992700205  
"Zfp414",1094.60925915864,-0.175928637510767,0.14858686235425,-1.18401  
206353851,0.23640828749788,0.374572467872067,-0.172756642255002  
"Cyp4f15",717.565013909551,-3.18599133966971,0.803108283862503,-3.9670  
7567794827,7.27598942771477e-05,0.000773540031960647,-22.8261405208164  
"Gm4924",237.111600177469,-0.187604923685291,0.193421451600049,-0.9699  
28217027423,0.332082273976237,0.476869949770855,-0.13892359730287  
"Arhgdig",93.3249269674934,-0.343259615963915,0.35960519558093,-0.9545  
45763470941,0.339807455992053,0.484466640606394,-0.248762544647292  
"Wdr90",1170.40820523692,0.305172327678055,0.24096409812715,1.26646388  
424646,0.205347051665775,0.338135023509779,0.330901402178099  
"Nme3",1275.75613614905,0.696957093194052,0.217289591633659,3.20750335  
050145,0.00133892500897631,0.00736427639633854,3.42283607432006  
"Eme2",1277.58093282447,0.195985355460729,0.142384859759642,1.37644800  
010036,0.168682975906451,0.292718108243501,0.240776871832332  
"Gm10509",21.2854102718245,-1.40585935813622,0.437224348363344,-3.2154  
1872816267,0.0013025437185693,0.00719665554680197,-6.93670530229501  
"Pnlcd1",60.0879831164642,0.191647694051355,0.452617932284482,0.423420  
462119251,0.671988518267301,0.778306481382631,0.0480336001425277  
"Sft2d1",2567.2152745113,0.00489145183797118,0.154978539468265,0.03156  
21237285747,0.974821249216392,0.984464946248574,7.65853986975726e-05  
"Rsph3a",1514.63943744404,0.633117324031816,0.222257569357026,2.848574  
85782544,0.00439155207899534,0.0179736529043348,2.54440249462972  
"Marc2",10104.8798831263,1.07543363867362,0.271223193925787,3.96512415  
884272,7.33577535276312e-05,0.000776698269304374,7.70059805839417  
"Ifi204",820.341060909691,-1.20177625837412,0.269783532543664,-4.45459  
456714472,8.40518756132877e-06,0.000148445966549627,-10.5940056649083  
"Ifi207",905.328845641503,-0.981431965593603,0.293318152892281,-3.3459  
6395046176,0.000819970554640095,0.00505143313566274,-5.18989397430365  
"Ifi213",825.411883260281,-0.579676856203246,0.402445922198582,-1.4403  
8446963617,0.1497586550537,0.267668370724819,-0.764017857059615  
"Gm10521",18.4489958452979,-1.31472083826578,0.776792478199686,-1.6924  
9944504201,0.0905507858354836,0.18288369817902,-2.23358561805926  
"Sh2d1b2",1.91027193509422,-0.78592499967678,2.00532205419013,-0.39191  
9591187155,0.695117626988259,0.796899563529676,-0.178425901192698  
"AA792892",1.33723577401666,0.681383468659548,1.53499282350487,0.44390  
0100525378,0.657114811873336,0.766568421796476,0.181133066509648  
"Dok6",27.1785321725467,-1.13527166368171,0.392309537135358,-2.8938161  
2277759,0.00380590966613606,0.0161754670460473,-4.68215501718791  
"Pappa2",98.3821381122222,-0.752299697846639,0.68344055452263,-1.10075  
366887191,0.271003881195268,0.413461163970684,-0.664424840920965  
"Cep76",346.506331909808,0.0395541891016794,0.178839492515993,0.221171  
445664566,0.824958941774033,0.887989921978034,0.004698835352651  
"Spink13",0.45823795476436,-1.77744947272542,3.79140997383936,-0.46880

9620956261,0.639205722399508,NA,NA  
"Gm4951",476.172415605014,-0.806735358213086,0.409683036632755,-1.9691  
6954346893,0.04893362505793,0.114442583828658,-1.7487457414123  
"Ppp1r12b",1959.88050105873,-0.842568066401224,0.231157258323095,-3.64  
499939354507,0.000267392432153574,0.00211805227816088,-5.1879092617126  
3  
"Gm8618",0.0933621026652515,-0.0749359102995288,4.78471990596623,-0.01  
56615040738516,0.987504438526807,NA,NA  
"Csnk1g3",2112.42744817689,0.53471571564142,0.113521230799231,4.710270  
59763908,2.47388113025722e-06,5.64821244470202e-05,5.23036794596497  
"Prr16",74.2266454860392,-3.43124418385788,0.767263026990133,-4.472057  
25175913,7.7470678713742e-06,0.00013921873673369,-30.4676099474396  
"Arl14ep1",1.31516051760012,-1.97774847322159,1.69239658405754,-1.1686  
0816894343,0.24256153547803,NA,NA  
"Spink11",3.31149146236177,0.725796005019168,0.891096681304284,0.81449  
7484107821,0.415360012926009,0.558684432397304,0.422537013617566  
"Pcdhb22",311.400483682054,-0.684471559672471,0.271242285201725,-2.523  
46922664888,0.0116203230714298,0.0381079797732025,-2.23639553973254  
"1700066B19Rik",21.2225668953818,-0.689364494729897,0.451816804502325,  
-1.52576107807506,0.127069377196688,0.236145521035066,-0.9949646348702  
77  
"Ecscr",557.23890449394,-1.16598764833183,0.237771511369222,-4.9038156  
0691361,9.39927278997689e-07,2.64836735345331e-05,-12.2883229637687  
"Prob1",1768.48801699207,2.06213859417135,0.568846200303673,3.62512502  
16148,0.000288821693886038,0.00224488576797197,12.5771908234916  
"Gm10548",20.2878332789562,-1.08783983616781,0.589158513452267,-1.8464  
2980000992,0.0648298236080918,0.141516137965431,-2.12709839787287  
"Gal3st2c",36.9925910001353,-0.475080678620289,0.272962107932662,-1.74  
046384026859,0.0817776041128349,0.169159741671128,-0.844176460707425  
"D2hgdh",1760.03608983252,0.30248563890541,0.195794054183163,1.5449173  
8866819,0.122366246864894,0.229943820486864,0.444629768577066  
"Cops9",3536.23465665575,0.342343603695732,0.340032193750023,1.0067976  
2089647,0.314032038168786,0.459167355096737,0.266459901025529  
"Fbxo36",718.244301455982,1.56044680071934,0.384296586434196,4.0605273  
5258042,4.89620005374233e-05,0.00056986454691056,11.6567121566584  
"Rab18",7188.32839390558,-0.900379352708453,0.308222495930511,-2.92119  
934331933,0.00348686643649676,0.0151824300533305,-3.77044337717316  
"Wdfy1",2826.0867439098,0.72365372836397,0.244266388361848,2.962559577  
75072,0.00305092760327426,0.0136994265323637,3.10476490124698  
"Gm10557",58.4736605335717,-0.70345796435072,0.445498810765481,-1.5790  
3443814362,0.114328158133142,0.218279957982983,-1.07064672202669  
"Catip",86.0226619532873,-0.627963401241986,0.401003007549317,-1.56598  
17742508,0.117352884024274,0.222668989169453,-0.943244335386688  
"Nbeal1",2616.57852946213,-0.340385368910668,0.0888308538939089,-3.831  
83718257613,0.000127189905551323,0.0012006356172685,-2.289058990662  
"Hspe1",8588.33867570227,0.721387073055133,0.33055952245549,2.18232125  
850275,0.0290858311358849,0.0768032957052388,1.85144549709664  
"Pgap1",924.365090621665,-0.0750735348824524,0.224112368252118,-0.3349  
81667758727,0.737638915116748,0.828579534908766,-0.0141170112823291  
"Tmem88b",235.122519328426,1.40557283406486,0.442293631499537,3.177917

86714056,0.00148336764957841,0.00797427693175625,6.79107336074034  
"Gm10563",1.39982499052349,-1.21596588846286,1.74397194769051,-0.69723  
9362177311,0.485653009171684,0.622772928170306,-0.575848988094976  
"Faap20",1614.45431093087,0.285559215203955,0.175819361165616,1.624162  
51151639,0.104341129437303,0.203831614243917,0.454170808210407  
"Klhl21",1298.77548372647,-0.315176702310453,0.238298051706041,-1.3226  
1552309814,0.185963269322414,0.314530866173528,-0.364556401969591  
"Rpl31",8475.65220772886,-0.000252097768596836,0.23546517876391,-0.001  
07063715289131,0.999145755308684,0.999607159782889,-9.90535995415929e-  
08  
"Cenps",100.967927317833,-0.667640094441253,0.303328440799347,-2.20104  
680155231,0.0277327107774289,0.0740526423908942,-1.73785318212927  
"Gm13241",15.6941425370622,-0.831086533208746,0.428235421238077,-1.940  
72347122987,0.0522918278586382,0.120319336746251,-1.7599137720721  
"Gm13102",0.0804673502708677,-0.544048378937456,4.78471990596623,-0.11  
3705376621746,0.90947135024012,NA,NA  
"Pramel4",1.57893302975299,1.09927161735448,1.38693554420085,0.7925902  
6993059,0.428016579508736,0.570903493450632,0.616180322478222  
"Lmbrd1",3379.20907540814,0.119368007914624,0.132556641432928,0.900505  
675341985,0.367851206432223,0.512897799128681,0.0796994734370374  
"Ppp1r14bl",0.113223189076304,-0.0636467458667775,4.78471990596623,-0.  
0133020839500791,0.989386785583963,NA,NA  
"Cplane2",16.81527897257,-0.580911555738499,0.592455746881563,-0.98051  
4677756392,0.326832128016694,0.471693029760881,-0.43651254954782  
"Gm10566",6.05621821799834,1.58680295845766,0.715483339348308,2.217805  
6024379,0.0265680899720786,0.0718082365228152,4.17925196293339  
"Gm10571",4.10830053737782,-0.0802811128400428,0.722600980373604,-0.11  
1100199170136,0.911536890805753,0.945480705230906,-0.00450070353443249  
"5730409E04Rik",843.300286496825,-0.821287192607613,0.20057254220886,-  
4.09471398010397,4.2268987441129e-05,0.000508741183411811,-6.228289860  
75899  
"Sh3d21",591.718035220162,0.364169190005876,0.188609622572468,1.930809  
17632373,0.0535066551431033,0.122392393474921,0.764945779763897  
"Olfr1330",9.89581168057565,0.845678493994756,0.48798948002409,1.73298  
509212332,0.0830983185468461,0.171038848836314,1.49335368347973  
"Btbd19",257.093182295859,-0.993914790081399,0.213437680995736,-4.6566  
9784943576,3.2132148291846e-06,7.00014108820573e-05,-9.50877798681722  
"Kncn",1.52750182541307,-1.55874528940305,1.57687314385107,-0.98850392  
3401375,0.322905913921345,0.468035943327266,-1.18341529802713  
"Kti12",926.782486886959,0.216548384443856,0.166590586950623,1.2998836  
753486,0.193640840969265,0.323864223470469,0.244143343081946  
"Krtap5-5",0.117005207039703,1.36469123774578,4.78471990596623,0.28521  
862607759,0.775476651221608,NA,NA  
"Efcab7",104.79949870713,0.25018854891344,0.346406973187322,0.72223877  
773427,0.470147685969329,0.608129201342044,0.124435757526417  
"Alg6",527.52877097421,-0.217649342669164,0.104834617185138,-2.0761209  
2754433,0.0378827680842124,0.0940451061651094,-0.514518858275499  
"I0C0044D17Rik",0.252115847811122,2.79800997492053,4.71575005438048,0.  
593332967747399,0.552958339660458,NA,NA  
"Spefl1",14.8823258957234,-1.05369169888475,0.435697437770786,-2.41840



233047017,0.0155888298870905,0.0475146170296219,-3.21030134778792  
"Cdkn2b",249.636287904514,-1.27326836045585,0.314661551795855,-4.04646  
946278939,5.19959041256998e-05,0.000594962522677755,-9.45657957249162  
"Nps",7.1445276552048,0.325116838380134,0.59662522641216,0.54492640268  
539,0.585804136497247,0.709441556113249,0.11160518466048  
"Insyn2a",4.99428232413993,0.247513783112031,1.15857940765232,0.213635  
579466736,0.830831251471928,0.89210024109011,0.0282603254773328  
"Gm10581",0.850770035559932,0.886174315765236,2.36921882261543,0.37403  
6499839626,0.708377160896352,NA,NA  
"Gm10583",0.128253348780207,1.33514403910425,4.78471990596623,0.279043  
30145625,0.780211594256507,NA,NA  
"Mup14",56.9317292505597,1.68510373361993,0.852738273103251,1.97610895  
015602,0.0481424389612546,0.113135021678503,3.67213304964849  
"Mup11",78.3530104443352,1.20363197352341,1.07626303330692,1.118343691  
34201,0.263420233380441,0.405373569690702,1.08681496811276  
"Tufm",5459.519886892,0.320254454488956,0.344588204215777,0.9293831029  
93322,0.352690581380176,0.497738922680274,0.223434996846669  
"Mup7",155.41133138718,1.89045225422348,1.26616343692802,1.49305547695  
337,0.135422665690115,0.247701522381816,2.63818433995806  
"Iqck",107.175993284926,-0.458040204760758,0.234530039077117,-1.953012  
95545407,0.0508180600717576,0.117860180240172,-0.979407339879213  
"Gm13305",44.0278345833895,0.367633767434635,0.502285294431751,0.73192  
2219324675,0.464216043479564,0.603177586103839,0.185854906099117  
"Gm13306",2.91824459881065,-2.07467368555474,1.18424640644739,-1.75189  
358756725,0.0797921073924471,0.166021396856038,-3.72536415676919  
"Gm13304",227.224285078787,1.09462407944105,4.07511876060229,0.2686115  
77660933,0.788228601960128,0.863438768864966,0.16072616499681  
"Gm5859",221.086996998117,-0.933719094752163,0.570414629362412,-1.6369  
1295189227,0.101648659281454,0.199792899059454,-1.50373028211676  
"Ccl27a",1017.81394914806,0.542793484257865,0.221305951232475,2.452683  
63202614,0.0141794985350776,0.0443846303478797,1.69072681577059  
"Il11ra1",4130.98596044159,0.554270869088587,0.182996908031101,3.02885  
373885326,0.00245483498683263,0.0116631928764041,2.46723551064903  
"Olfr472",311.490123137621,0.201024699309683,0.268338743845758,0.74914  
5264782311,0.453769655265541,0.594117696640312,0.104669105570893  
"Rbmxl2",30.3023607211176,0.499148093654456,0.365932703389908,1.364043  
41298407,0.172553902694744,0.297897644301586,0.604471000365455  
"Olfr716",8.34606714885821,0.863365328625082,0.636328729169924,1.35679  
13706353,0.174847510191418,0.301084231538661,1.03635370778505  
"Olfr713",27.4909443534532,0.834581757717251,0.441791521102029,1.88908  
504996978,0.0588804333398038,0.131629695899599,1.6923337023274  
"Olfr704",1.41052500307535,-0.533992387152662,1.26156241391428,-0.4232  
78611714367,0.672091997324572,0.778358859814357,-0.133801191801426  
"Olfr703",0.220184838260432,1.16717879088917,4.7847199059637,0.2439387  
9136674,0.807278225328341,NA,NA  
"Gm1966",169.514028997476,-1.47598030358835,0.598973322267,-2.46418371  
022276,0.0137325705395884,0.0432760757878048,-4.63480740089269  
"Mob3b",1191.57787056694,1.00439501532225,0.248418130494689,4.04316308  
68574,5.27349127259293e-05,0.000601301361596591,7.44900957005269  
"Olfr678",1.10405491378222,0.624101412994921,1.72176424212118,0.362477

857146134,0.716994967543998,NA,NA  
"Olfr676",29.9322809583724,0.849171139909305,0.355208721913783,2.39062  
58138431,0.0168196852329512,0.0503267544295861,2.53835803529156  
"Olfr656",39.0184182397225,0.848000493105539,0.338877514463221,2.50238  
052662999,0.0123361253940436,0.0397493998767156,2.734937724395  
"Olfr653",0.193595530535309,0,4.78471990595378,0,1,NA,NA  
"Olfr652",0.0886915477092957,-0.544048378937457,4.78471990596623,-0.11  
3705376621746,0.90947135024012,NA,NA  
"Trim30e-  
ps1",0.962945065021989,-2.52674806952245,1.83393292433667,-1.377775618  
72192,0.168272575882749,NA,NA  
"Olfr646",7.0431309952897,0.942392161823534,0.59445047217814,1.5853165  
333867,0.112894434430437,0.216186965480716,1.44337882783473  
"Olfr641",0.111546761784032,0.528936876484576,4.78471990596623,0.11054  
7093012702,0.911975503879754,NA,NA  
"Olfr633",8.12537850291226,0.794291366404078,0.79681829330345,0.996828  
728807297,0.318847650925257,0.463912506360769,0.610062877559479  
"Hbb-  
bt",1964.2388812644,-0.132863354369522,0.459206884675685,-0.2893322352  
15413,0.772327146551657,0.852708646855278,-0.0211700951595126  
"Olfr596",1.58308484155394,-1.0217176685462,1.6048462034904,-0.6366452  
22653767,0.524355961394939,0.657189209698433,-0.428900026371704  
"Olfr561",0.305508674477007,-0.820790421642752,4.76107793741065,-0.172  
39592219092,0.863126277806658,NA,NA  
"Olfr557",0.146625948940742,-0.733790538282752,4.7847199059654,-0.1533  
61231734358,0.878113415764461,NA,NA  
"Trim68",955.129375164192,-1.1256189204752,0.296168467798025,-3.800603  
51746433,0.000144344101505967,0.00132264609837491,-7.4607383248489  
"Olfr554",0.0978630835954031,-0.060151050410746,4.78471990596623,-0.01  
25714883196698,0.989969667766945,NA,NA  
"Olfr552",801.406174562638,0.413255004059846,0.291202691021046,1.41913  
181712314,0.155860589454894,0.276119368816238,0.531826960902533  
"Gm9574",0.148177164577155,2.59891947282789,4.7275994170606,0.54973343  
6265582,0.582502219767124,NA,NA  
"Rhog",1795.1813171301,-0.670791351638051,0.208064751299988,-3.2239547  
9026095,0.0012643335857433,0.00704188307545427,-3.32436121720986  
"Ggh",1060.52196566129,-0.382445245202316,0.314421026529852,-1.2163475  
4972726,0.22385255518082,0.359919295794712,-0.390811407428407  
"Ttpa",294.810526178994,1.31539707347004,0.290091284399808,4.534424659  
43629,5.77607144472155e-06,0.000110739273381692,11.9810732676102  
"Cnbd1",0.946595608159724,1.37046752189017,2.47682112903351,0.55331711  
5162428,0.580046283382997,NA,NA  
"Olfr520",0.232779338028142,-1.00475298011262,4.78124187542131,-0.2101  
44771231445,0.833554683158721,NA,NA  
"Klhl40",0.918857834564353,-1.54105418933116,1.71029562622313,-0.90104  
5506813512,0.367564124597533,NA,NA  
"Gucy2d",0.700003888546396,-0.819870890641812,4.10822778967959,-0.1995  
68021204042,0.841818440010087,NA,NA  
"B3gnt6",9.98289078836176,-0.0848097535252616,0.528543117472779,-0.160  
459479504299,0.872519138655126,0.920135116312274,-0.00705911898554751

"Omp",57.4503080174007,-0.577231827075534,0.325122535907097,-1.7754285  
3332221,0.0758271561613413,0.159473399938931,-1.05972729431471  
"Slc22a13",2427.90991811682,2.58480150258815,0.947717046563392,2.72739  
792110013,0.00638360055799264,0.0239821664122814,9.64245930109797  
"Exoc8",676.517398075963,-0.534273105017228,0.243031350440482,-2.19837  
113215593,0.0279226691378907,0.0744375448250741,-1.38793190985231  
"Gm5921",2.18605385925236,-0.59327412868021,1.1883340262974,-0.4992486  
25008852,0.617604242959958,0.736201475162515,-0.181691064699064  
"Mc1r",43.7969745323074,0.532424397238901,0.584906180235152,0.91027316  
043207,0.362678469409586,0.507572839258406,0.361044998209826  
"Fbxw18",2.85788690184925,-1.47596966600531,1.22231537878689,-1.207519  
50897497,0.227232136509131,0.36354904387093,-1.49344672594514  
"Fbxw15",26.7987208588357,1.89194331090718,0.500438544340874,3.7805707  
2602003,0.000156469261007131,0.0014059159682567,12.4245170713717  
"Fbxw19",17.421586669271,-0.297925998008856,0.474825806677863,-0.62744  
2724929605,0.530369068925624,0.662680942384609,-0.122585119093413  
"Fbxw16",0.568137441520325,-0.0232803532517132,2.54379898773677,-0.009  
15180537611027,0.992698017717318,NA,NA  
"Osgin1",2385.4865893061,1.22114150234091,0.340866027829856,3.58246760  
498659,0.000340363835844724,0.00255541550685423,7.28965358552957  
"Mlycd",2916.58715089737,0.746359226337175,0.34743838504056,2.14817722  
644562,0.031699679132368,0.0819735203876541,1.86691237248747  
"Gm10617",24.6641913738016,0.939650224797189,0.370485495061717,2.53626  
724209718,0.0112041196002671,0.037033287709258,3.09702897938151  
"Fam169b",383.223804769019,1.39621414397037,0.386053898556507,3.616630  
08505017,0.000298463355887307,0.00230199308270994,8.48057674932111  
"Snrrp40",1113.047552658,-0.171258157510481,0.125493808946643,-1.36467  
415363332,0.172355486666434,0.297660520728266,-0.207530915113264  
"Svip",1043.35923374167,1.33026196893734,0.295551921815881,4.500941698  
37966,6.76530622210766e-06,0.000124678582909882,11.9587510945784  
"Rbm15b",1453.57094188973,-0.486449041397052,0.114368846667643,-4.2533  
3520071841,2.1060994956324e-05,0.000299305597418663,-3.94706962690919  
"Rpl10-  
ps2",0.407599653168008,-0.537412713592062,4.78471990594593,-0.11231853  
1524536,0.910570848744301,NA,NA  
"Mrgprx2",0.432079268238142,-1.92667814479645,3.7893954773155,-0.50843  
9448014898,0.611145193907042,NA,NA  
"Mrgpra9",0.220934797106265,0,4.78471990595636,0,1,NA,NA  
"Saa1",2.39729120180279,-0.686273641100362,1.52009848715866,-0.4514665  
64106073,0.651653318014431,0.762752815142597,-0.185857495352661  
"Ntf5",115.259160394009,-0.692986063816638,0.225999993399751,-3.066310  
10643827,0.00216718418192322,0.0106330541467385,-3.14878163203962  
"Cmtm2a",0.276820350109743,-1.83452811868481,4.75374318390569,-0.38591  
2332179787,0.699561597032613,NA,NA  
"Rpl13a",39595.6675592145,-0.0900667702112498,0.183244896643366,-0.491  
510387798353,0.623065506868342,0.740676320055275,-0.0270372846283423  
"1700057G04Rik",2.82242199100849,0.444319886190525,1.10074018779996,0.  
403655550251674,0.686466030286676,0.789593544435084,0.104964782130174  
"Il4i1",380.15294438662,-0.958879321549882,0.369404649240995,-2.595742  
42912227,0.00943867913714308,0.0323550221195527,-3.28990155364561

"Nlrc5",2072.73146357205,-1.08077024232303,0.412461191015346,-2.620295  
59596267,0.00878535792610079,0.0306051293269811,-3.76820018910501  
"Ces1h",3.68727284702821,1.45346265606382,0.943840590844045,1.53994506  
081163,0.123573745696075,0.231543426252362,2.12639818683864  
"Zfp976",410.67202037201,0.068146382183661,0.140998030357861,0.4833144  
26525687,0.628872498186218,0.74497948462331,0.0200621994009083  
"Vmn2r-  
ps54",7.60146887793435,0.572661268035071,0.821322083177184,0.697243237  
171708,0.485650584538742,0.622772928170306,0.271197091010546  
"Zfp788",1067.15534064932,-0.115498922692138,0.145700159533952,-0.7927  
16514941248,0.427943006112613,0.570903493450632,-0.0647411998152042  
"AW146154",705.579539535708,0.145558231609424,0.111771590062807,1.3022  
8291042143,0.192819691465969,0.322934061518937,0.164525505636088  
"Plekhl1",1020.13207646952,-0.255387735378723,0.147324975287013,-1.733  
49925822954,0.0830069692278758,0.170908323241829,-0.451175121019219  
"Gm10639",78.7182755790194,2.33006071284442,0.637312357573979,3.656073  
32911939,0.000256108122360186,0.00204487967640414,14.428706006158  
"Znhit6",848.895984128585,0.119040820043046,0.122136593607944,0.974653  
185638738,0.329732321957512,0.474471957435559,0.0887512121578893  
"Gsta1",26.2142205102408,-0.255311069719279,0.64254476179785,-0.397343  
632535287,0.691114075930747,0.79341393384937,-0.0590815879670533  
"Smt3h2-  
ps2",0.0988800539518094,-0.0469987059377266,4.78471990596623,-0.009822  
66608315407,0.992162772415381,NA,NA  
"Zfp791",133.129264413385,0.289288125959425,0.179800146157782,1.608942  
66295848,0.10762887958884,0.208230590813972,0.453924660950227  
"Clca4b",2.47805552274445,-2.46094041906796,1.53970522805311,-1.598319  
19397956,0.109971957867887,0.211692490325606,-3.82090672765939  
"Clca4c-  
ps",1.96107601040455,-1.35699501855871,1.33109976825679,-1.01945402660  
225,0.307987468320764,0.452842142924233,-1.07502730963934  
"Krt dap",1.89455914177029,-3.00877518387918,2.59932685922617,-1.157520  
90707626,0.247059602545647,0.386331552685462,-2.8615237207856  
"G430095P16Rik",30.2455229313868,-0.469544004985142,0.371491577597118,  
-1.26394253140878,0.206250654665865,0.339250486306313,-0.5075848388365  
92  
"Adh6b",25.594014143156,-0.500285945927947,0.833514183814699,-0.600212  
876568357,0.548364373141252,0.678297820688202,-0.194195407263467  
"Adh1",18968.1871850529,0.616199364325606,0.313238822664169,1.96718707  
81683,0.0491616471768095,0.114906952367949,1.33322902534057  
"E130208F15Rik",61.4823573650984,0.701560661599014,0.322480889355602,2  
.17551081244196,0.0295918587509756,0.077844314884852,1.79111552529828  
"Sdhaf1",1337.79920412481,0.824715342648234,0.222143254228005,3.712538  
31458576,0.000205190986077394,0.00172821332463802,5.2457398000104  
"Dnajb14",3829.13320073533,0.244642011860497,0.131399599538371,1.86181  
702775325,0.0626288855109775,0.137810406240045,0.484850231289328  
"Gm10643",113.654169936104,0.54898714943108,0.168524857969251,3.257603  
39481342,0.0011235731820101,0.00643390011830629,2.77028488529502  
"Misp3",608.385181406559,1.25010375782383,0.636095372596166,1.96527723  
935744,0.0493821584363197,0.115249872075022,2.70104006847809

"Cox7a1",852.045918944015,-0.82046204115337,0.709454320209829,-1.15646  
915915701,0.247489307428337,0.386817356011039,-0.779277017340319  
"Zfp382",42.5045627237228,-1.06072381286189,0.445838579145077,-2.37916  
560495032,0.0173518785204196,0.0515585076792351,-3.14508646006726  
"Zfp568",606.349465343855,-0.226489501820864,0.173188947894464,-1.3077  
5955726043,0.19095487555939,0.320802874690418,-0.257502356440187  
"4932431P20Rik",1.35319359618414,-0.619700403679459,2.17612143451244,-  
0.284772896333473,0.775818138409536,0.854965357073935,-0.0971035388788  
401  
"Spint2",20994.3129541571,0.46343975059627,0.206842349767901,2.2405457  
6403865,0.0250555132310607,0.0685948324879558,1.24180445730777  
"Ap1ar",2587.07309458663,-0.113055390593916,0.0939635146219795,-1.2031  
8392781224,0.228905153007823,0.365463676841997,-0.113800242931275  
"Cib3",13.9786420885301,-0.208800966615686,0.668400173208743,-0.312389  
156952652,0.754744789850592,0.840674887889565,-0.0362374645008463  
"Gm10651",16.4889732253363,0.826583637558784,0.608873830807394,1.35756  
144497571,0.17460288387101,0.300742670469696,0.993140484588016  
"Dda1",1949.97227459329,-0.195533833303639,0.106834148164203,-1.830255  
93093236,0.0672116778017318,0.145448756246189,-0.376975825817226  
"Gm10653",1.85158248288225,0.219120672820268,1.50123095201231,0.145960  
668161384,0.883952438087033,0.927826477057546,0.0164144500317376  
"Cyp2a4",10455.6551167444,2.47631493555756,1.09096260794724,2.26984400  
521023,0.0232170495349057,0.0646009364516576,6.78393007169143  
"Gramd2",143.382750579932,-1.55187050511106,0.2498193158267,-6.2119716  
4028578,5.23238721053338e-10,9.62463073877169e-08,-25.0725711504745  
"Erich4",2417.71629339126,1.75865847566783,0.736196696018026,2.3888432  
0614333,0.0169015137930435,0.050505090565021,5.25079345044008  
"Amy1",2095.53568641851,-0.643046307424115,0.517840718622042,-1.241783  
97777456,0.214316275798459,0.349003000606815,-0.676918616751014  
"Amy2a5",8.20281441416848,3.9024880409836,2.06141838288459,1.893108198  
40597,NA,NA,NA  
"Rec114",4.41576435123396,-1.10740441166856,1.0432478030519,-1.0614969  
985357,0.288464096228907,0.432452171941507,-0.928318894668187  
"Ceacam1",1191.36412082321,0.231590314046455,0.172332113460847,1.34386  
046451563,0.178993512667036,0.306197555460133,0.274092875311705  
"Phldb3",468.480628623365,0.163504543649001,0.142723034287293,1.145607  
2557978,0.251957693695271,0.392041426196663,0.153103654309645  
"Zfp94",291.387890535926,0.165422180534709,0.166497696894139,0.9935403  
52932849,0.320446695476716,0.465717774925835,0.126411571157861  
"Zfp109",78.2980460119085,-0.481353497374076,0.329301073625633,-1.4617  
4287278912,0.143811683992233,0.259513208188853,-0.649320683091708  
"Vmn1r168",8.35998128059584,0.146179852945511,0.930511740202861,0.1570  
96194093846,0.875169037014097,0.922100125725339,0.0118554002405656  
"Smim31",3.24605035861595,-1.16878740244282,1.58264621340344,-0.738502  
005403579,0.460209448984289,0.599650082617994,-0.597728384455624  
"Peak1",1573.028020189,-1.0101853536712,0.199030835552269,-5.075521844  
98519,3.86433954665477e-07,1.30357945468295e-05,-11.3623744962996  
"Apoc4",206.704290853016,0.296969134840973,0.34832845429635,0.85255491  
2405514,0.393906174986748,0.538331996908363,0.183906990742404  
"Ovvp1",199.18943994151,0.340415071074421,0.417981350749074,0.81442645

8176557,0.415400686538298,0.558698920556294,0.198170779923651  
"I830077J02Rik",158.199243782966,-1.11412481185764,0.517971790956467,-  
2.15093723501881,0.0314811540683599,0.0815165394455355,-2.793054463259  
76  
"Tmigd3",0.491218811967619,-1.59691479540023,3.02125582277266,-0.52855  
9939665986,0.597110756433102,NA,NA  
"Tnfaip8l3",24.6279064892867,-1.18661977837459,0.538574932223838,-2.20  
325846484332,0.0275765366706864,0.0738074553198411,-3.09268182642275  
"Ccdc61",864.130572381922,0.352312299622462,0.163180017531277,2.159040  
70211865,0.0308470093591732,0.0803654447468143,0.888239548132801  
"Psg23",193.606583014952,1.49404514052798,0.420372789406888,3.55409574  
115383,0.000379281112714691,0.00277182276450939,8.79731150409392  
"C5ar2",178.383031187648,-1.51756512039346,0.359993248313192,-4.215537  
72884426,2.49183726570529e-05,0.000341432487749274,-12.113752012465  
"Ehd2",5725.16198499183,-1.8572348595591,0.401770523959325,-4.62262597  
379374,3.78912562528125e-06,8.03921343217995e-05,-17.5111138590194  
"Crxos",0.785407593650901,2.12469840870431,2.0066307476225,1.058838758  
06334,0.289673219038708,NA,NA  
"Sult2a3",0.659039665627025,3.35554831033619,3.19398636160107,1.050583  
16800518,0.293450075019834,NA,NA  
"AI429214",158.358924194295,-0.330477711557352,0.176019315793885,-1.87  
75082158843,0.0604484723573393,0.13430085620139,-0.663491112560646  
"Foxr1",6.32719718634921,-1.47843535459651,0.753094244921201,-1.963147  
85907201,0.0496289958778852,0.115699150130461,-3.188633177862  
"H3c13",0.851336887274552,-0.668240649498916,2.34622853463199,-0.28481  
4816474701,0.775786020259695,NA,NA  
"Zfp865",2463.7437046064,0.039314184399934,0.171750715608626,0.2289025  
94441124,0.818944624030518,0.883907128665765,0.00485149930287728  
"Zfp628",636.411618173013,-0.021193713341863,0.148970479922974,-0.1422  
67873157296,0.886868421875053,0.929736033642657,-0.00154405882806538  
"Gm10689",1.74423819408695,-0.358827450277436,1.22121992850152,-0.2938  
27051051919,0.76889006326717,0.850514442726844,-0.0580991468190974  
"Gm14548",15.8504977294162,-0.966995296222569,0.582614690907132,-1.659  
75096631524,0.0969645616776038,0.192721125903809,-1.59216846810564  
"Gm15448",5.42156236632322,-0.806225821923479,0.896181704962539,-0.899  
623165100407,0.368320825116256,0.513374942849257,-0.537550113831939  
"Gm10693",11.2475571407853,-0.465248125553382,0.589596957202408,-0.789  
0951943866,0.430056370471823,0.572762234389317,-0.259275614196908  
"Spopfm2",0.224775304585742,-0.0601689351544951,4.78471990596004,-0.01  
25752262069816,0.989966685600102,NA,NA  
"Smcp",110.882978410166,1.73889346369742,0.768973283525087,2.261318437  
13227,0.0237395453454138,0.0656744686641428,4.73508521067297  
"Sprr2a3",489.934655182767,-2.66349708365349,0.82504705581128,-3.22829  
718001289,0.00124529530529702,0.0069552471677689,-13.232943133861  
"Pate9",0.296060783763101,-0.0671034748778836,4.78471990596069,-0.0140  
245356461279,0.988810406345781,NA,NA  
"Gm15319",1.02546917598587,-0.550435575538683,3.50258020852098,-0.1571  
51454861647,0.875125486221063,NA,NA  
"Pate2",14.2844778366314,0.629187144030998,0.579324767703709,1.0860698  
162879,0.27744810510068,0.420954256731232,0.544392287911978

"S100a16",4038.91205807362,-0.550240007346323,0.226438518272246,-2.429  
97530431096,0.0150998516575916,0.0463794750503655,-1.68973108426051  
"Gm10702",16.5057151447874,-0.756922414965056,0.401749915858919,-1.884  
06365523885,0.0595563656586607,0.132803066973075,-1.52814154078804  
"Zfp872",33.8408581229203,-2.94856752837099,0.769725216077475,-3.83067  
550183287,0.000127791946381768,0.00120429549084181,-19.819859712349  
"SpC24",390.551183402891,0.474609701941074,0.333319085107895,1.4238899  
6953908,0.154478325854835,0.274193754894636,0.614107122149158  
"Rtraf-  
ps",0.360536932367893,-0.56014783274787,3.79791309966778,-0.1474883226  
7828,0.882746596088251,NA,NA  
"Mex3a",1064.4036320878,-0.637921865347507,0.430140165234978,-1.483055  
79647281,0.138059586978964,0.251578114665031,-0.880333285807801  
"Bg1ap",1.55671905791578,0.459906119881292,1.05498652361608,0.43593554  
0015159,0.662883498512192,0.771313627379049,0.119419318809831  
"Bg1ap2",6.99188249223513,-5.97054548767876,1.97901167941674,-3.016932  
92150677,0.00255346309526485,0.012023043571957,-26.3953646954233  
"Bg1ap3",233.068715908284,0.774399159864491,0.345684679949063,2.240189  
41186112,0.0250786287615833,0.0686292075218737,2.07464405566357  
"Clec4g",6.0872913656944,-1.76952769210891,0.944126689832693,-1.874248  
13975176,0.0608962317962353,0.135095543015473,-3.54219280074116  
"Zfp558",35.5230986838724,-0.307946661457903,0.304265282246768,-1.0120  
9924176676,0.311490604901823,0.456615578856909,-0.241403522471047  
"Ubtfl1",0.457049688843605,-0.163983134995948,3.20418813420439,-0.0511  
777486613361,0.959183882600706,NA,NA  
"Fat3",53.2267077362103,-1.27410200923893,0.55527843446479,-2.29452816  
8498,0.0217601789635994,0.0614890194644987,-3.55333884495032  
"Arfp1",2862.02497382946,-0.356907421975147,0.222421585368328,-1.6046  
4381810835,0.108572212479313,0.209681160748973,-0.557549062396547  
"Gm10709",1.20179817655549,-0.999537987647172,1.81030591277327,-0.5521  
37614198004,0.580854072922569,NA,NA  
"Zfp971",122.681740909469,-0.481556493531347,0.359453433112907,-1.3396  
9090060154,0.180345857081164,0.308022382740762,-0.567072657211612  
"Gm14327",232.21153913691,0.167355267646242,0.351091118728063,0.476671  
891480875,0.633595781573224,0.748672840986287,0.0484415152966403  
"Gm14296",587.879743015697,-0.0591900461428064,0.157553902644138,-0.37  
568124400255,0.707153883298999,0.805802490594582,-0.0127801144282281  
"Zfp972",24.0432405371555,-0.104529850698734,0.505642747919919,-0.2067  
26688217604,0.836223313410986,0.895517227708431,-0.011535268284494  
"Rps8-  
ps4",0.791695559231501,-0.906060264788767,2.18257432250136,-0.41513375  
0749147,0.67804399334996,NA,NA  
"Eif1-  
ps1",0.604848468346878,1.51461612659296,2.53354288452207,0.59782533615  
1229,0.54995648328698,NA,NA  
"Gm10720",0.211626059649607,0,4.78471990595649,0,1,NA,NA  
"Cass4",81.0725154946315,-2.09477227123139,0.48456786863037,-4.3229698  
1876297,1.53942799845126e-05,0.000236904239256533,-17.4868542403276  
"Kcng1",93.6967135973699,2.82406819647209,0.772969178215492,3.65353273  
592596,0.000258656793855102,0.0020593263236369,17.4679247095703

"Mocs3",416.08437056669,-0.183952072803151,0.219719476172844,-0.837213  
32313046,0.402472669853504,0.546286955572824,-0.111219424916679  
"Ripor3",1244.47943417149,-0.134209701191006,0.358171243310795,-0.3747  
08198096597,0.707877494573836,0.806344300356409,-0.028887894126709  
"Lekr1",290.652795703384,0.00675910045963584,0.182231914593897,0.03709  
06516276168,0.970412725821605,0.981941181421263,0.000123176962288914  
"4931440P22Rik",74.0120185027434,0.12959078510589,0.269322526593234,0.  
481173211706925,0.630393398225156,0.74606436895867,0.0379627648131405  
"Arfgef2",2464.75558078134,0.159980908269571,0.171634940988567,0.93209  
9882157608,0.351284908943196,0.496293975405727,0.112080518261746  
"4930449A18Rik",0.345481033673316,-2.09802041621591,4.72774001737908,-  
0.443768144716849,0.657210221679699,NA,NA  
"Ankub1",1.4019794871482,0.405254410945181,1.98830534507317,0.20381900  
1920084,0.838494943143271,0.896803937983383,0.0441395064493409  
"Wfdc9",0.11235393834966,-0.5416703124363,4.78471990596623,-0.11320836  
3933879,0.909865364838827,NA,NA  
"Wfdc6a",1.42804525506039,-3.35076092713821,1.93215975005252,-1.734204  
9108761,0.0828817319353659,0.170827485124288,-5.92113328882808  
"Spint3",0.126731683733319,-0.0788433223283236,4.7847199059596,-0.0164  
7814791209,0.986852935162024,NA,NA  
"Mgst2",438.240563911806,-3.22911060624733,0.801511198075407,-4.028777  
90603686,5.60675547501133e-05,0.00063081660849262,-23.7936865641686  
"Tox2",64.6812615775443,-0.904220038850692,0.437638623372441,-2.066133  
99860089,0.0388158287725056,0.0958082443354487,-2.12076359265326  
"1700034I23Rik",6.55164700765674,1.31677800058059,0.563120520189819,2.  
33835911384782,0.0193686268398333,0.0560643536405981,3.79397329798829  
"Mafb",2001.40474454814,-0.757563917435022,0.333081050376356,-2.274413  
13932159,0.0229411581825327,0.0639740706869312,-2.08275337485989  
"Gm826",17.3332553139167,0.673645189624428,0.453174854579898,1.4865016  
9535313,0.137146468762319,0.250288454504652,0.933093711879903  
"Arhgap40",112.338222184006,-2.35041599086832,0.590576578194834,-3.979  
86658741639,6.8953954156899e-05,0.000742797899531058,-16.9349506574276  
"Mroh8",4.64927984928475,0.0370995987152585,1.19022484128489,0.0311702  
439979391,0.975133770228397,0.984521038460692,0.000578754164391691  
"Tldc2",104.84692223982,1.26785966505337,0.777321509032897,1.631062115  
63703,0.102877213443082,0.201618243814776,2.03032416176794  
"Tmem267",837.389304367267,1.1578019790954,0.364363161774485,3.1776043  
809061,0.00148497226040863,0.00798070262774188,5.59302739151945  
"Sox2",4.07575439254488,-0.25169841467648,0.77127690470469,-0.32633988  
2785485,0.744167216323553,0.833559624511785,-0.0458217075276661  
"Rdh16f2",2355.51003159474,2.60084081372866,1.05124888556839,2.4740485  
8110497,0.0133591529366905,0.0423401761962924,8.22390768359884  
"Cpne1",2702.08429125809,-0.405717023563989,0.135478005390739,-2.99470  
7682578,0.0027470797073594,0.0126715306681082,-1.77233322394641  
"6430550D23Rik",124.864858643173,0.312769556063711,0.325149802604736,0.  
.961924483909112,0.336087538729089,0.480533833473155,0.229215558719197  
"Fam83c",24.1191650090244,-5.88364666692711,2.05951462239184,-2.856812  
28137826,0.00427918832350403,0.0176508597274554,-23.7521097155222  
"BC029722",1834.70651301703,0.070217156884201,0.189929240885554,0.3697  
01666561768,0.711604789906505,0.808653117705853,0.0149130872239366



"Mcidas",1.29907924834384,0.383270180861733,1.8296866348494,0.209473127016244,0.834078911570913,NA,NA  
"Myh7b",19.0597169659126,-0.570511560417196,0.917899115644775,-0.621540592744163,0.534243994743928,0.666412219916647,-0.231540320304491  
"Lrrc31",257.277861468318,0.714354292937092,0.521159599220686,1.37070159314977,0.170467997991495,0.295054152227089,0.871938258722514  
"Gm1527",4.28600341660824,-0.445464715242287,1.04338862476013,-0.426940360160334,0.669422767693908,0.776320632881409,-0.112787058651214  
"Eif2s2",8551.37922381331,0.422880391892096,0.185265094945208,2.28256915862733,0.0224557593900214,0.0629626684766519,1.16935448062367  
"Kif5a",522.242767491779,1.65945669692025,0.436500075885359,3.80173289444304,0.000143687586080829,0.00131965169731701,11.002840845249  
"Bpifb4",0.0765733336795006,-0.0638733235179301,4.78471990596623,-0.013349438373244,0.989349005575396,NA,NA  
"Tspyl3",164.019716223434,-1.31948265668415,0.294209699160668,-4.48483738112106,7.29695639487821e-06,0.000132581880464041,-11.7807503801051  
"Ttll9",15.7924782487343,0.32702177086134,0.637194440097591,0.513221318772421,0.60779651489027,0.728071293686213,0.103782420754622  
"Foxs1",231.254034041141,-2.04627153194019,0.379624906045476,-5.39024573823683,7.03614024408504e-08,3.50871259537519e-06,-25.7017052745694  
"Sirpb1c",77.5189874143805,-1.46429348206119,0.581178174429532,-2.51952593281484,0.0117512983704061,0.0384376473118904,-4.77171938219076  
"Defb25",3.63974572870634,-0.689330257365952,0.907679732170679,-0.759442161077506,0.447588100872828,0.588513911310163,-0.365451685425596  
"Defb28",11.0969824685982,-1.41765095866983,0.837885631334609,-1.69193850049887,0.0906577002011275,0.183023914066839,-2.40736761111961  
"Defb26",3.92222868269884,0.429812176192226,0.922071022993053,0.466137819619416,0.641116853905686,0.754678605255559,0.12097635725957  
"Defb23",0.0825573251723767,-0.0762715950891888,4.78471990596623,-0.0159406603914438,0.987281731815468,NA,NA  
"Zcchc3",650.882606385577,0.310397794753899,0.244574538587917,1.26913372318321,0.204393374369236,0.336934563193385,0.337671375618515  
"Il22",0.0861935957450157,-0.0647422764701941,4.78471990596623,-0.0135310483670036,0.989204114852618,NA,NA  
"Csnk2a1",7112.42923296739,-0.0196812534234325,0.146335771671194,-0.13449379600536,0.893012116590973,0.93382853574598,-0.00134742659576782  
"Ccl28",289.627435185855,0.776063411640811,0.499564957089415,1.55347848288307,0.12030886587155,0.226930663322383,1.15098799320344  
"Zfp345",3.19954377735973,1.02056013111302,1.09904312600765,0.928589704045807,0.353101759686736,0.498030823956306,0.711425638196612  
"Zfp950",4627.62118020674,0.254782227042984,0.22362692894315,1.13931818608373,0.254570465825567,0.395223739363557,0.236515168303731  
"Taf7l2",0.31276492091849,-1.84004418660376,4.75367775581313,-0.387078022769554,0.698698447187015,NA,NA  
"Gm21994",0.241402050812603,-1.91226050533222,4.75158060865894,-0.402447240787087,0.687354909099483,NA,NA  
"Syndig1",41.9001777702225,-1.88330147319018,0.672861333903894,-2.79894441587748,0.00512699622771228,0.0202483638744043,-7.34427550904938  
"Fndc10",266.202281351233,-0.622351935966759,0.235008996220007,-2.64820473248664,0.00809205029333228,0.028749780725108,-2.20880490107107

"Thbd",2749.52857134653,-1.27025186300916,0.308264572205053,-4.1206547  
1527558,3.77797264579892e-05,0.000466220953467008,-9.74391263025627  
"Pdzd8",1088.75756605911,-0.362338381265848,0.123014180006128,-2.94550  
092719228,0.00322432181393671,0.0142686851402946,-1.53982506836772  
"Atxn7l3b",8779.04576835138,0.390192003695162,0.128963882506387,3.0255  
9132147589,0.00248147456126278,0.0117564790053949,1.73375994617139  
"Kiz",1044.87275256041,0.755841503263034,0.157735113021897,4.791840502  
61598,1.65258259261955e-06,4.04291786585898e-05,7.64606149852757  
"Smim26",879.357263645365,0.712800888120818,0.250518258019135,2.845305  
14365293,0.0044368896458641,0.018124968429721,2.85866288550994  
"Ism1",82.4679300694705,-1.52232093925282,0.352633523859517,-4.3170057  
1911388,1.58160062003236e-05,0.00024073418336761,-12.6836997959005  
"Bhmt",123.134081940258,1.69930807357083,0.562049658315681,3.023412697  
48872,0.00249941133158777,0.0118285247920627,7.54023998136728  
"Ankef1",603.056307574945,-4.04836524524685,1.30640162524642,-3.098867  
27558473,0.00194262024525635,0.009767202047965,-18.7387703749435  
"Ube2n",4286.00374144281,0.120179730930148,0.10863938108917,1.10622621  
120702,0.268628620538994,0.410898316723096,0.106888994356114  
"Plxnc1",474.76124661103,-1.4731545415977,0.413767571063028,-3.5603431  
6032297,0.000370370471420675,0.0027292076537265,-8.69712721037237  
"Hspa12b",943.444922917896,-1.16265724056397,0.376101381006623,-3.0913  
3999309483,0.00199255339038351,0.00995919149082227,-5.35898879912007  
"Arrdc3",4252.54763622679,0.165117814428631,0.221646648832899,0.744959  
67025928,0.456296100791561,0.596344351044565,0.0853555090495016  
"Slc4a11",661.552683595729,0.668280656112927,0.38383162317372,1.741077  
63864591,0.0816699704130112,0.168990882215101,1.18814320674697  
"Itpa",1459.48458715224,-0.198094276889874,0.254660216580099,-0.777876  
809931821,0.436641640667808,0.578583972925933,-0.108391559776572  
"Gm4149",4.46531071095508,0.961497660098162,0.749990913681878,1.282012  
4118277,0.199838292254662,0.331358705874768,1.062025881498  
"Gas2l3",211.376295704665,-0.573932854827503,0.277660619086377,-2.0670  
3009132512,0.0387313185944912,0.0956865787173977,-1.34683516406494  
"Hps6",382.976745002845,4.54213612828214e-06,0.110255960052676,4.11962  
865872475e-05,0.999967130118979,1,0  
"Papolb",2.84182690972937,-2.06021473955838,1.15308018162534,-1.786705  
53218109,0.0739850944829722,0.156714977971645,-3.81825067645328  
"Pdzd7",84.9895048265358,0.695664030887692,0.254795998831347,2.7302784  
7406725,0.00632808465728167,0.0238240962826179,2.59973666611975  
"Rslcan18",77.8050565170025,-0.0842021392406646,0.31390501756955,-0.26  
8240819763286,0.788513956273393,0.86358732345215,-0.0123491075641512  
"Itpripl1",687.598291716914,-0.538566899911933,0.325533755732152,-1.65  
441184033482,0.098043862341494,0.194333559818486,-0.882269101782476  
"Gm10767",129.734190959771,0.270670964192688,0.192142078571008,1.40870  
217604448,0.158923251218702,0.27991739406163,0.344634712313004  
"2010315B03Rik",1147.75257040075,-0.0328139003824086,0.130136968626646  
, -0.252148952973919,0.800925933041971,0.87291525111528,-0.004459960519  
75107  
"Zfp640",1.19839916349727,-1.09482942314617,1.65635718376855,-0.660986  
310123769,0.508621092976114,NA,NA  
"2410141K09Rik",0.621434884674893,0.225449776676577,4.47322594113428,0

.0503998187534898,0.959803780818248,NA,NA  
"Gm10774",0.146854719523001,-1.09588946218151,4.77913116968581,-0.2293  
07257589575,0.818630113016537,NA,NA  
"Gm10775",15.9480237483883,0.31485639306007,0.453886542481591,0.693689  
641773947,0.48787686329074,0.624556698866972,0.148207048579265  
"Hpse2",24.3517174208603,-0.224419424004023,0.440291502055677,-0.50970  
6462550903,0.610257124754957,0.72996256066487,-0.0706387141252009  
"BC025920",295.366536563836,0.0886232555057649,0.303162655600255,0.292  
329064509258,0.77003503859546,0.851190157182055,0.0142789544602061  
"Platr25",513.12009148289,-0.562809353104967,0.208424254809417,-2.7003  
0641884553,0.00692756390563121,0.0255627632535953,-2.06360721240886  
"Zfp934",636.054569761696,0.0896529483345131,0.144750430865637,0.61936  
2220881625,0.53567776325075,0.667389458649401,0.0362539943940748  
"Zfp808",116.719379068264,-0.183375840091531,0.278633005686239,-0.6581  
26770157395,0.510456675349807,0.644683380145349,-0.0805012540995792  
"Gm6478",4.96038577473264,0.501008641683489,0.673563533522396,0.743817  
942553196,0.456986623736235,0.597006712871632,0.258433745190131  
"Ctxn2",1.42237918541691,2.54117337584339,1.79934876549835,1.412273942  
97824,0.157869315665698,0.278715675194656,3.24650934102934  
"Ctla2b",212.164898229045,-1.04704848980012,0.26045409340372,-4.020088  
43906758,5.8176297998428e-05,0.000650786837850459,-7.68253862812834  
"Gm10780",0.0837058623428614,-0.544048378937457,4.78471990596623,-0.11  
3705376621746,0.90947135024012,NA,NA  
"Mageb3",4.66369385001525,0.209722130613324,0.80745301821366,0.2597329  
20532386,0.795069796964969,0.868669220061805,0.0295273807822862  
"Cyp2c68",7.64857242928586,0.9092614134194,0.842223662868797,1.0795961  
3758922,0.280322062157033,0.424126605721877,0.77989467273122  
"Serf2",18571.3340261346,0.5725825974986,0.140599982571382,4.072422962  
12876,4.65265912919618e-05,0.000547944613162784,4.2997153110531  
"Grk6",1748.75378371528,-0.720441383733646,0.139593709246715,-5.160987  
46584884,2.45650628953227e-07,9.08745933807127e-06,-8.36332679043026  
"Lcmt2",524.064929862271,0.164832113589448,0.111336570158398,1.4804849  
2382101,0.138743881184368,0.25254814651244,0.226834268466252  
"B3galt5",971.39519668551,1.78956113224784,0.650982569003899,2.7490154  
382876,0.00597745707715731,0.022767817560151,6.768849002115  
"Eif4e1b",0.434551021569792,-2.46222286507662,4.67910377585616,-0.5262  
16767788207,0.598737605016859,NA,NA  
"Ifit3",2646.29462069329,-0.207573384065399,0.313761863982782,-0.66156  
3459084976,0.50825103236678,0.642747349143046,-0.0917481741135502  
"Sptbn5",176.29736953615,-0.471487481065168,0.309054571261776,-1.52558  
002666076,0.127114489471572,0.236180514171595,-0.680431343117702  
"Gm2058",0.229620943444323,0,4.78471990595749,0,1,NA,NA  
"Ranbp6",1149.23656806603,-0.0620001390718994,0.0908250265940535,-0.68  
2632765405198,0.494838924455742,0.630818525599089,-0.0285657615416806  
"Gm815",0.114818043445778,0,4.78471990596623,0,1,NA,NA  
"Chst14",339.141896609806,-1.06773360024436,0.219173154140677,-4.87164  
408629641,1.10673406514709e-06,2.99709733364417e-05,-11.1207456933807  
"Inafm2",1495.05558154922,-0.00647726875977838,0.209249782252814,-0.03  
09547216252421,0.975305649260607,0.984546184275605,-0.0001008800318734  
33

"Fam122a",521.059791087006,0.172495265983219,0.176805796491396,0.97561  
9970647363,0.329252824249213,0.474028765207942,0.128765520715378  
"Pak6",1094.7953416371,0.691782536381661,0.245428034512257,2.818677734  
82541,0.00482219056588943,0.0193184860599368,2.7302531655722  
"Ptar1",1775.30930671747,0.0305255899625841,0.11222868481767,0.2719945  
44105875,0.785626214431252,0.861343900639932,0.0045562933400035  
"Gm13981",0.206769947013767,0,4.78471990595689,0,1,NA,NA  
"Grem1",191.398855670208,-1.0396538922634,0.627163857172649,-1.6577069  
6186213,0.0973766279509438,0.193266438496285,-1.70886406075353  
"Chrm5",0.648796835846296,-0.997751298789332,2.23782364398899,-0.44585  
787690169,0.655699911403494,NA,NA  
"Olfr1314",0.503990052520402,-1.03329928397682,3.09631662997089,-0.333  
718869050721,0.7385917096409,NA,NA  
"Olfr1312",9.59667297569013,0.984866694616341,0.59327779456475,1.66004  
30753335,0.0969057872605272,0.192665345162206,1.62187902227057  
"Olfr1305",18.695592768903,0.246792473915294,0.5940643889442,0.4154305  
13102974,0.677826773346058,0.783000558486963,0.060370836403462  
"Olfr1277",16.6334886859996,0.370536858862969,0.425422787175807,0.8709  
84982545948,0.383762352874425,0.528420950454034,0.236351403458031  
"Ano3",5.46058980182867,0.2381259823047,0.923036006138115,0.2579812496  
16679,0.796421378175616,0.869707310650695,0.0332420414842457  
"Gm10794",4.18433165735193,0.975758909870147,0.93288339081183,1.045960  
21269175,0.295579402399858,0.439939479999422,0.801213308947233  
"Fibin",209.094337934004,-1.27421130628976,0.298226530481959,-4.272628  
94495176,1.93181773798853e-05,0.000280884282291576,-10.4199493235298  
"Gm11382",0.0921938571203131,-0.0803843497044132,4.78471990596623,-0.0  
168002205529689,0.986595993946669,NA,NA  
"Actg-ps1",0.177626551078171,0,4.78471990595385,0,1,NA,NA  
"Dcdc5",6.24022496250335,2.2892897771369,0.857359125364804,2.670164356  
34579,0.00758141267558206,0.0273641978418399,8.23805451794816  
"Gabrr3",0.480081101319771,-0.534078823271169,3.61949602081191,-0.1475  
56129416981,0.882693079652103,NA,NA  
"Qser1",1350.13234785074,-0.197676403452119,0.115284212767914,-1.71468  
754225761,0.086402528801954,0.17633206055898,-0.343044933023023  
"Pin1rt1",3.50267788195829,0.48540393368824,0.904152473196881,0.536860  
704447293,0.591363836195885,0.714532569755677,0.163157221751273  
"Nrbf2",1297.8495109906,-0.333954803065691,0.1973132116015,-1.69251111  
142095,0.0905485633354612,0.18288369817902,-0.56735743703071  
"Gm10799",0.325289603858509,-0.0819918616735069,3.86932629244384,-0.02  
11902164554133,0.983093918669254,NA,NA  
"Fjx1",349.009859939386,0.205593006406344,0.252273431258104,0.81496099  
4429887,0.415094637524695,0.558427210147365,0.119784858904689  
"Gm10800",0.580668535654468,-0.540901117756393,2.6653369794122,-0.2029  
39111239765,0.839182623937881,NA,NA  
"Accsl",6.13511850630435,-0.311213439651167,0.74818064491968,-0.415960  
292162566,0.677439059578565,0.782784567006214,-0.0762154738702383  
"Prdm11",1122.64494497543,0.285670470912185,0.284744703280718,1.003251  
21984992,0.315739665547826,0.460966111187852,0.221231997101564  
"H2bc3",6.78520163150457,-0.564267949423894,0.877541230397407,-0.64301  
0185593625,0.520217490732465,0.653640973985153,-0.239925066209873

"Nxpe3",893.495438510914,0.910667214348542,0.248775933044746,3.6605920  
9668303,0.000251633085284593,0.00202114435483568,5.64986264708251  
"Zfp408",1112.11259098217,0.19075949563803,0.204551934564739,0.9325724  
34692157,0.351040771290901,0.49602094054859,0.133748566112245  
"Slc22a29",85.879083088572,2.4216212762445,0.891850652035429,2.7152766  
7857589,0.00662204212648842,0.0246735290239387,8.96490083297322  
"Gm4981",0.964711041181352,-0.397193048405114,1.88801533576816,-0.2103  
75965110216,0.833374249964426,NA,NA  
"Duxf3",1.05835223793342,1.85933348623013,1.38131123099136,1.346064119  
7391,0.178281838800922,NA,NA  
"Vdac3-  
ps1",0.891553492856588,-1.24472511008057,2.03278752661543,-0.612324256  
117914,0.540323244400468,NA,NA  
"Yae1d1",1439.97175888486,-0.0581168389819552,0.163630594355095,-0.355  
170982608764,0.722461501937173,0.816753891388125,-0.0117638631643664  
"Olfr1271",23.4297472963027,-0.217212150696739,0.345574172786694,-0.62  
8554353310464,0.52964085215721,0.661898303766265,-0.0896311505091042  
"Olfr1264",0.344463928176796,3.11931181232618,4.63234682149842,0.67337  
6137954452,0.500708025489355,NA,NA  
"Olfr1256",2.21607555179046,-0.742066429837769,1.26341783221713,-0.587  
348390148602,0.556969747959343,0.686329782323912,-0.279311603608061  
"Olfr1254",0.384760973932277,-0.54684581114379,3.77481193869455,-0.144  
867034444345,0.884815854524208,NA,NA  
"Olfr1250",159.868072632002,0.594916801277665,0.190682007362165,3.1199  
4198879883,0.00180886659899259,0.00925108043844964,2.78600426256382  
"Olfr1247",566.866091904886,0.516606091972972,0.191466633515787,2.6981  
5206172922,0.00697255831533599,0.0256753431600418,1.89192731005108  
"Olfr1239",0.218186994526575,2.22170858953881,4.75380905932204,0.46735  
335008505,0.640247092666351,NA,NA  
"Olfr1233",0.889422413154606,2.28450174248745,1.97308582807608,1.15783  
191485138,0.246932636559533,NA,NA  
"Olfr1226",17.2569101834204,0.891623198028268,0.557659323076727,1.5988  
6719567242,0.109850114427923,0.211589568760367,1.38478612071701  
"Olfr1224-  
ps1",0.543971764496758,0.448873702181455,2.6430833614636,0.16982956675  
7551,0.865144173774349,NA,NA  
"Olfr1221",31.022458198514,0.629272281744854,0.443258505270581,1.41965  
077773459,0.155709374734174,0.27597685561012,0.810149219823884  
"Olfr1219",0.186168132172104,-0.0665793018349587,4.78471990596623,-0.0  
139149841878808,0.988897807234145,NA,NA  
"Olfr1211",0.211386208257158,-0.564784456986496,4.7847199059603,-0.118  
039188936211,0.906036606641477,NA,NA  
"Olfr1209",11.5018536649145,0.831414420247981,0.555965546660278,1.4954  
4234394081,0.134799036504531,0.246952138848571,1.16278355932418  
"Olfr1200",0.139896150021884,0,4.78471990596454,0,1,NA,NA  
"Olfr1198",37.0582653505,0.50722745402243,0.275055877307764,1.84408876  
838827,0.0651702044992628,0.142055745928074,0.989872495430377  
"Olfr1196",0.43915433264815,-1.54391066393627,2.70916608148674,-0.5698  
84096248911,0.568756312249243,NA,NA  
"Olfr1195",1.78536663875853,0.892703850638703,1.50726171465015,0.59226

8643170511,0.553670709985839,0.683344189346999,0.339902890827181  
"Cd80",96.2865500543788,-1.92915857587858,0.428642273781053,-4.5006260  
3219574,6.77536174052936e-06,0.000124745989817603,-17.3416520155572  
"Olfr1173",326.707909993407,-0.192133443356359,0.144636245900931,-1.32  
83906959806,0.184049071496695,0.312231392216994,-0.223645388569607  
"Olfr73",28.0256313773845,0.12509693258603,0.541225898772646,0.2311362  
64671952,0.817208942659316,0.882913501633033,0.0155780761779771  
"Olfr1160",6.77405497803651,-0.278720590251969,0.799733910647232,-0.34  
8516658530083,0.727452205400637,0.820839320536139,-0.0550272209808682  
"Olfr1157",0.207795695386742,-0.0311051080969916,4.17773280045672,-0.0  
074454517755638,0.994059443865669,NA,NA  
"Olfr1156",363.618115026322,1.0340953909334,0.298662808196048,3.462417  
69164173,0.000535345629355446,0.003650986037486,5.80412717886  
"Olfr259",60.3972640221255,0.527767985333789,0.473766563533621,1.11398  
318487779,0.265286400472411,0.407180975321621,0.474198234169984  
"Olfr1109",0.0980156114669698,-0.052421387384144,4.78471990596623,-0.0  
109559991837303,0.991258552281853,NA,NA  
"Gm10812",4.57115134998119,0.545371378473451,1.19526139311015,0.456277  
916794716,0.648190141813924,0.760194361441577,0.149530546086935  
"Olfr1106",5.41760176697635,0.312273886091051,0.80347592728978,0.38865  
3692643148,0.697532342232755,0.798110206349771,0.0704204430818492  
"Olfr1090",0.452833658489912,1.54110204975249,2.22331604430581,0.69315  
4737806818,0.488212449440819,NA,NA  
"Olfr1087",0.514921858569734,-0.0651518408301563,4.58891313304731,-0.0  
141976627016454,0.988672284693591,NA,NA  
"Olfr1055",0.93959019168637,-2.86466578312612,2.37295651729282,-1.2072  
1376993215,0.227349828796587,NA,NA  
"Olfr1051",0.211370406601301,0.4.78471990595005,0,1,NA,NA  
"Olfr1048",17.6397200170853,-0.422478611976624,0.545472932831026,-0.77  
4518012807607,0.438624520325932,0.580683113614546,-0.229638286037333  
"Olfr52",2.75049216998868,-0.734620907197856,1.398383772975,-0.5253356  
92100449,0.599349849592083,0.721152069689338,-0.240151430567709  
"Olfr1043",0.289206877099017,0.389405047109029,3.89312474499576,0.1000  
23778485283,0.920325447607772,NA,NA  
"Olfr1039",31.4889568967682,1.08883700677915,0.502556433296994,2.16659  
64947178,0.0302656349154253,0.0791681445641216,2.76148802939581  
"Olfr1012",8.49963233759711,-0.288939940461705,0.508500246180363,-0.56  
8219863475187,0.56988568536289,0.696803235571382,-0.104380192044001  
"Fads2b",3.65950294333927,-3.40856933243374,1.41120538629784,-2.415360  
20591289,0.0157196553904402,0.0478087413512404,-10.3639145175019  
"Lrrc55",36.1948958823915,-0.0350320134184417,0.356900124475724,-0.098  
1563496787867,0.921808142934274,0.951892335475387,-0.00172719539366908  
"Ccfdc162",104.269332718414,0.889608279214893,0.578939743192011,1.53661  
63571877,0.124387284571486,0.232758606218692,1.29682948237213  
"Znhit2",987.888270865022,0.645041826526242,0.195585039657688,3.298012  
0956858,0.000973719397598515,0.00575146343967763,3.32731986353292  
"Ccfdc58",885.827624784308,0.78491808977087,0.173613977358244,4.5210535  
5636908,6.1532616724818e-06,0.000116256100862452,7.11113421861995  
"Amd1",4165.8699413076,0.324588351113035,0.251286710670849,1.291705200  
98932,0.196459255634754,0.327370529558707,0.362455682360682

"Gm6043",0.169282362348442,0,4.78471990596579,0,1,NA,NA  
"Heg1",2795.17122357756,-1.00733150533792,0.167697650972757,-6.0068313  
3898855,1.89184134415251e-09,2.4756458072675e-07,-15.32311824197  
"Cerkl",66.807755886381,-1.02881492030032,0.404639534626187,-2.5425467  
1692116,0.0110047888862675,0.0365467569387485,-3.40451608926588  
"Cenpw",663.185326940256,0.109375703664256,0.168941740069759,0.6474166  
98911075,0.517362291204529,0.650871298644513,0.0469706690553687  
"Pjvk",10.1727872304339,1.19363890351091,0.460809070135863,2.590311217  
52657,0.00958891990812598,0.0327261964587153,4.08174301366668  
"Gm10819",0.18204270006224,0,4.78471990596056,0,1,NA,NA  
"Bex6",12.5759312025914,-2.0575529913636,0.754918521277868,-2.72552988  
61667,0.00641983641644318,0.0240811793858809,-7.66711049608044  
"Pde11a",109.206162360302,-0.153941278489,0.410296449948139,-0.3751952  
48480599,0.707515263687126,0.806120061437012,-0.0331778227353009  
"Ttc30a1",230.694342262315,-0.211047954322195,0.223718144884844,-0.943  
365386973101,0.345494041209761,0.490172656298327,-0.150476682837621  
"Ttc30a2",14.7032007280448,-0.357235839060588,0.430622044082289,-0.829  
580937552566,0.406775758142314,0.550709188464021,-0.213108467424835  
"Ttc30b",448.874860915786,-0.400610672761596,0.285662818784831,-1.4023  
8997313594,0.16079882590635,0.282379132443664,-0.506574066441263  
"Gm13653",1.61530440648795,-0.116620311391322,1.26830236473402,-0.0919  
49928214301,0.926737822471747,0.955102028203625,-0.00535719988516562  
"Mrpl23-  
ps1",1616.39553961592,0.266634481609485,0.161049773176635,1.6556029626  
7569,0.0978022498215074,0.19397296989317,0.437290271352426  
"Wipf1",1414.24677019628,-1.15782204546845,0.220150606528997,-5.259227  
14328724,1.44662108680583e-07,6.11848545564862e-06,-13.8987227282925  
"Carns1",346.200172503543,-0.700218736887723,0.232408575541574,-3.0128  
7822644249,0.00258782735773701,0.0121437558691238,-3.08862294839707  
"Aldh3b2",622.320561981148,-2.700597055255,0.658843496956569,-4.098996  
29840776,4.14945671232152e-05,0.000501898926655367,-20.5167377551676  
"H60b",4.53761484709602,-0.571824876277199,0.895906474585461,-0.638264  
029224462,0.523301823179756,0.656416556121904,-0.240715226925311  
"Erich2",204.861786846226,0.677712684467627,0.274980794565559,2.464581  
88303057,0.0137173216986176,0.0432629365633983,2.1283288851434  
"Sp5",472.564110287349,1.50058770681914,0.568020344644339,2.6417851419  
7184,0.00824703546507241,0.0291206099561982,5.30654197734079  
"Klhl41",67.2280999741103,0.0216075265946701,0.225890693286139,0.09565  
47889615776,0.923794749358059,0.953075522841759,0.00103848216614138  
"Gm13597",1.73490872197858,-4.61513945741606,4.68234968541021,-0.98564  
604685473,0.324306833703763,0.469159715355095,-3.49279303399765  
"Scn9a",0.986696119260705,-0.89037738881717,3.36760260266983,-0.264395  
029304016,0.791475541336368,NA,NA  
"Scn2a",60.1090851545445,-0.381910755940108,0.273758693387866,-1.39506  
348168827,0.162996697209053,0.285262508049736,-0.47904801587714  
"Fign",992.196848841302,-0.115338902059551,0.309660844384572,-0.372468  
473657942,0.709544080511185,0.807368060385607,-0.0246797142255522  
"Zbtb2",682.533018940453,-0.104014808046156,0.124501644529457,-0.83544  
9270082105,0.403464798614667,0.547328786153815,-0.0626903057895518  
"A930003A15Rik",0.948683434824221,-2.19377715324555,1.57245063473272,-

1.39513260689322,0.162975855029517,NA,NA  
"Rprm",114.980378374059,-0.985748758167036,0.584785189314081,-1.685659  
58266361,0.0918613858630685,0.185013252924089,-1.66328130224148  
"Gm20775",0.169140413210904,1.39131657052081,4.78471990596491,0.290783  
284678025,0.771217070112664,NA,NA  
"Igl1",7.6726628555176,2.18706548930521,0.711833003756911,3.072441819  
58735,0.00212315217066635,0.0104617692756261,9.97307918635044  
"Rc3h2",2841.66393583311,0.176998964998112,0.210279294274215,0.8417327  
32692624,0.399937571913946,0.544095923609972,0.107726830065503  
"Olfr361",15.3834953117761,0.721390568593732,0.590931686022741,1.22076  
812879851,0.22217382420331,0.358012281548298,0.741003726116526  
"Olfr358",0.0845412381163432,-0.544048378937456,4.78471990596623,-0.11  
3705376621746,0.90947135024012,NA,NA  
"Olfr353",0.401069958204818,0.396159174942807,2.37733107303654,0.16664  
030493523,0.867653078328025,NA,NA  
"Olfr351",212.171632057031,0.480800323834524,0.189413160220235,2.53836  
810111551,0.0111370775015923,0.0368901946116141,1.58654947231234  
"Gm13443",0.338098319368161,3.11084490351226,4.68274734628628,0.664320  
466911238,0.506485224293659,NA,NA  
"Hoxc4",631.282386501316,-0.453771376030792,0.212974723242266,-2.13063  
48900128,0.0331192328729943,0.0848454608537174,-1.11941940041845  
"A630010A05Rik",16.2137517912705,-0.155925220617442,0.49374256956441,-  
0.315802667683693,0.752152293145296,0.838793491863817,-0.0274102097376  
483  
"Krt76",0.220579319468594,-0.0587426935145853,4.78471990595315,-0.0122  
771436299746,0.990204502723872,NA,NA  
"Smim41",32.9525565372799,-2.04932113773959,0.45678049048247,-4.486446  
29190493,7.24209623810411e-06,0.000131968591075284,-18.3064763103587  
"Prd",46.5006857399651,-0.591991691027065,0.377922633154026,-1.566436  
19379576,0.117246535225325,0.22253216624388,-0.889576217540862  
"Fnbp1",5890.22816558623,-0.795433897146305,0.18591489206179,-4.278484  
03280109,1.8817048534175e-05,0.000275604419747346,-6.51980892284015  
"Dolk",1155.20711821372,-0.471286123259115,0.379651918448601,-1.241363  
73440431,0.214471409886598,0.349178653137014,-0.49587386854687  
"Smim6",694.656929262866,0.662282930133425,0.214139902494641,3.0927581  
567849,0.00198305669616031,0.00992699344332061,3.05477844024173  
"Gm13547",0.797891209559664,-1.0864583757916,2.14084106349239,-0.50749  
137538461,0.611810086360447,NA,NA  
"Dnlz",1822.23213332333,0.228310456433198,0.173398212726361,1.31668287  
027557,0.187944947802485,0.3168444504253,0.262407325886817  
"Gm17205",1.84168987143218,0.402733133206435,1.54941229631227,0.259926  
382516114,0.794920560218322,0.868554837945466,0.0567549873027017  
"Alg10b",1854.80089409072,-0.332510961565351,0.249265742288946,-1.3339  
6173301628,0.182216398037073,0.310312656117172,-0.389095988396219  
"Slitrk1",13.0139875139927,1.31547688937976,0.822977581381272,1.598435  
87375963,0.109946006182944,0.2116732191412,2.04255624233119  
"Commd6",2177.77585422457,0.268717151751496,0.268601635151922,1.000430  
06662826,0.317102425549905,0.462288796503808,0.207332878857068  
"Kbtbd6",16.9879130155573,-0.7893327123708,0.464332711917158,-1.699929  
15018149,0.0891442530398006,0.180735639572635,-1.35032715526229



"Fam187a",0.422828153201454,-1.00071564208439,3.08819069073892,-0.3240  
45935727159,0.745903257226014,NA,NA  
"Cyp2d37-  
ps",6.22758393860994,1.7430125795374,0.663390662211719,2.6274300782683  
,0.0086032520956402,0.0300566581904305,6.10868576589302  
"Malrd1",209.917972715851,1.10232032040718,0.576816645650755,1.9110411  
0590214,0.0559992986008065,0.126814671790769,2.27632291695038  
"4930407I10Rik",0.195811498738837,-0.161737094944977,4.77935733399022,  
-0.033840762186732,0.973004131022583,NA,NA  
"Gm10849",1.25658417552162,-1.3059251011627,1.88833772338783,-0.691573  
909152098,0.489204951282821,NA,NA  
"Aarsd1",1809.80755194684,0.489580084292082,0.176423707203198,2.775024  
35502165,0.00551975740731059,0.0213837134766028,1.88249696392651  
"Urad",0.150347356545012,1.37942029850426,4.78471990596623,0.288296979  
888879,0.773119418764016,NA,NA  
"Rsph10b",88.820051224517,1.22857344004127,0.381987887936668,3.2162628  
1575965,0.00129871837124661,0.00718374524070161,6.06415791871213  
"Defb30",1.1275881162551,1.79198083902009,1.84632651871733,0.970565509  
86713,0.331764688046915,NA,NA  
"Defb47",3.72924914850649,-3.57045442807114,1.8318532282043,-1.9490941  
5945465,0.0512841810422654,0.118673031327094,-7.61000659670176  
"Defb48",0.216459634077975,-1.76339607442448,4.75589426724941,-0.37078  
1177068586,0.710800522158867,NA,NA  
"Gm16409",1.80284113473107,1.28707197719275,1.03324814923173,1.2456562  
1351438,0.212890635276787,0.347271949019225,1.36126793287707  
"Hoxb2",1451.58689321606,0.393754179050506,0.225075006084987,1.7494353  
8111835,0.0802157894781282,0.166618457786784,0.705626690024772  
"Nrpb2",6988.74197275307,0.699764706782419,0.237600727129917,2.9451286  
4179829,0.00322820412204513,0.0142793838411152,2.9732571835638  
"Nynrin",845.242539045955,-0.673295047036246,0.199866960229118,-3.3687  
1610127263,0.000755191707257589,0.00473311729608116,-3.60426368570547  
"Gal3st4",24.0392995360137,-7.56798921738971,1.28095777197957,-5.90807  
080681067,3.46137249373855e-09,3.6767720030535e-07,-112.127785781273  
"Zfp652",1988.74647130616,-0.788441647698753,0.137084346966784,-5.7515  
0748531337,8.84511640452842e-09,7.24367910523317e-07,-11.1469615313516  
"Smok3c",0.477561994299282,0.405886191102611,2.59955264475644,0.156136  
938377195,0.875925082789752,NA,NA  
"Smok3a",0.466970943771671,3.30451842689462,4.69292528024437,0.7041489  
53916981,0.48134001642169,NA,NA  
"Zc3h3",859.457290221751,0.0505163010280757,0.150801185916106,0.334986  
099221919,0.737635572241239,0.828579534908766,0.00949920891125596  
"Ly6a",30348.0207588509,0.393308219308441,0.349585044838812,1.12507163  
883338,0.260558678305464,0.401959372100354,0.358462786530394  
"Cyp11b1",1.0681579153428,-3.54181214327188,2.22333381602001,-1.593018  
60914978,0.111156016428722,NA,NA  
"Slurp2",3.07488750079139,0.108007328496936,0.921797224230224,0.117170  
37723468,0.906725040736847,0.943048212742681,0.00633331976036051  
"Gm7935",0.0987330424883298,-0.0724335097221066,4.78471990596623,-0.01  
5138505731921,0.987921681344786,NA,NA  
"Tmem92",8.36885821993822,-1.56546575381503,0.676419108002126,-2.31434

289081335,0.0206489208403405,0.0588689613763647,-4.4340898529028  
"Gm11545",1.40107095415219,-2.57875330684119,1.72603126260206,-1.49403  
626847038,0.135166139958997,0.247369006656704,-3.60219371265539  
"Selenot",10431.5997826438,0.125493762831216,0.257656141001034,0.48705  
9079374757,0.626216464210742,0.742924771474357,0.0372917879404822  
"Selenos",2280.08113837151,0.0816608931332282,0.252112286745341,0.3239  
06836066717,0.746008568339542,0.834806879332208,0.0147442713817653  
"Selenom",2606.83592038737,0.252722052988285,0.219241757266263,1.15270  
948444991,0.249029647213964,0.388570747549445,0.238893107651723  
"Selenoi",1111.56010190364,-0.592235714816629,0.225347658575837,-2.628  
09792903759,0.00858637931556557,0.0300084645805516,-2.07654174553762  
"Txnrd2",1302.44838074898,-0.0375791842043571,0.375217810496343,-0.100  
152986220582,0.920222869835492,0.950948988554825,-0.00189003972093349  
"Msrbl",6714.70444889254,0.711794297833684,0.393671200098364,1.8080933  
9788085,0.0705919655616119,0.151070370378697,1.34529800041665  
"Gpx4",32121.6736978078,0.321385363448614,0.425467172911629,0.75537052  
8939413,0.450026691115488,0.590795261665096,0.169140536578246  
"Dio3",68.3339698527605,-1.52511571032125,0.415064158572215,-3.6744095  
5530228,0.000238400071859292,0.00193841726485091,-9.52569502285008  
"Hus1b",3.74625921045163,-0.401878332734459,0.940137831463865,-0.42746  
746198768,0.669038879711435,0.776067587400414,-0.101882452943538  
"Sox4",10042.1367324958,-0.300561032135124,0.356849241627115,-0.842263  
334411653,0.399640569584754,0.543843650597678,-0.183069765143331  
"Ywhaq",9107.33431436514,-0.438854403750236,0.143814706164779,-3.05152  
661680794,0.00227680861142766,0.0110430881357255,-1.97745624405889  
"Cep295nl",13.5677154949388,-0.226585094125328,0.463511652616402,-0.48  
8844439716487,0.624951833244512,0.742162500975133,-0.0675647421015504  
"Wfdc3",37.0009913596025,0.617401310204444,0.405298937512601,1.5233232  
8822167,0.127677843571144,0.237001389370732,0.888866045005947  
"Acsf2",1741.75161125714,-1.64087643527559,0.450766496081186,-3.640191  
65031303,0.000272435186677871,0.00214191180235691,-10.0849192531139  
"Oxct2a",2.07461422125806,-1.29266970440618,1.62285792392959,-0.796539  
047162,0.425718789307891,0.568655542503614,-0.729686713910591  
"Selenoh",741.661785334012,-0.39696329110766,0.330665908106905,-1.2004  
965778913,0.229946540897633,0.366658296894182,-0.39828316855624  
"Oxct2b",1.00036200086526,-0.977565677769898,2.09457036350404,-0.46671  
4174325714,0.640704387273057,NA,NA  
"Mog",0.777673516206132,-1.40263498148899,2.33362781312583,-0.60105342  
1458069,0.547804405556067,NA,NA  
"Ass1",58433.2310213179,2.2046145291323,0.796937341627231,2.7663586758  
6629,0.00566861489346474,0.0218296615189979,8.43151655076084  
"Trbv1",7.78872024745064,-1.99243191994352,0.972474131989254,-2.048827  
68024676,0.0404789680555547,0.0988179440524861,-4.6114360013173  
"Trbv2",5.10075739107592,-1.84005403062425,0.767864323785851,-2.396327  
02500374,0.0165603077971508,0.0497753786694691,-5.52059417600463  
"Trbv3",15.9350450804822,-2.03970896244155,0.74540637234587,-2.7363717  
8070048,0.00621207984137987,0.0235008018523913,-7.65037870294729  
"Trbv5",6.00244285693057,-1.00275249934906,1.00609375097894,-0.9966789  
85803628,0.318920353008332,0.463983662360577,-0.77001959839952  
"Trbv13-1",5.8251499319105,-2.08068184977432,0.974312461072333,-2.1355

3858018434,0.0327170423189247,0.0840404949505802,-5.15271811951631  
"Trbv13-2",11.5803290643018,-1.14745176439301,0.616045554595176,-1.862  
60862664132,0.0625173497557734,0.137669438419858,-2.27528192127504  
"Trbv13-3",5.71285806700543,-1.30082609010837,1.08523076454792,-1.1986  
6311627303,0.230658965337912,0.367463723029545,-1.30229690561072  
"Trbv14",2.5331036621559,-2.13783680716227,1.45165613979119,-1.4726881  
5841593,0.140835141040337,0.255397920158486,-2.9180028926495  
"Trbv15",4.32349447972046,-1.80075506231642,0.915912749596463,-1.96607  
707787647,0.0492897077636519,0.115123469331059,-3.89278240039728  
"Trbv16",9.71633544664011,-3.80385571099106,1.09059293111529,-3.487878  
56812996,0.000486869143990516,0.00339034806054539,-21.631852967256  
"Trbv17",3.07532200686734,-1.75054912633728,0.924349877872366,-1.89381  
658205725,0.0582493598668713,0.130620588692841,-3.56316997214121  
"Trbv19",5.2667097340451,-1.95217951174578,0.815193488568939,-2.394743  
74994433,0.0166319844483685,0.0499534670756096,-5.85002482548089  
"Trbv20",3.73091858769574,-1.37999626580565,0.87561579106154,-1.576029  
44110068,0.115019018383081,0.219222169057939,-2.09437837080316  
"Trbv23",0.550268361001881,-2.22124223271182,3.05010605280949,-0.72825  
0819562752,0.466460061948564,NA,NA  
"Trbv26",2.61075657436213,-1.51936825972294,1.06637996147005,-1.424790  
70745893,0.154217709265597,0.273855949114857,-1.96781442653359  
"Trbv29",4.64996565727948,-0.393477812433013,0.764909635873819,-0.5144  
10845385038,0.60696477827435,0.72746804119941,-0.125198820585611  
"Trbv30",0.16706118684088,0.381301127017375,4.78471990596623,0.0796914  
207124052,0.936482683031999,NA,NA  
"Trbc1",459.304550775528,-1.48898979555967,0.433910889120166,-3.431556  
64652452,0.000600127781347905,0.00396385212761567,-8.2349160858688  
"Trbc2",677.233900302844,-1.32437992161579,0.501196252508848,-2.642437  
79754201,0.00823115830224351,0.0290902890297524,-4.68479646901904  
"Trbv31",2.83284183715043,-3.70622354784156,1.48525878640908,-2.495338  
57786636,0.0125836995546792,0.0403282337141906,-11.8995847941078  
"Igv2-137",19.1327497279762,-1.85339496708819,0.935084096118446,-1.98  
206233512223,0.047472264409807,0.1118431864986,-4.06015360238743  
"Igv17-127",15.0864339349098,-2.03174961508524,1.05920925807185,-1.91  
817584637031,0.0550887177916559,0.125130454275595,-4.22278525419998  
"Igv9-123",1.5429040878648,-4.28717471770084,2.77650921502842,-1.5440  
8805650478,0.122567001835265,0.230190205945529,-6.29721370932382  
"Igv17-121",8.84091783013792,-2.9967174860274,1.14790553813417,-2.610  
59589528448,0.00903846272429719,0.0312689755497421,-10.384012274539  
"Igv2-112",4.46070810258412,3.70669837524688,2.43901777408532,1.51975  
045636433,0.128573705153998,0.238278690532522,5.31657056597087  
"Igv16-104",10.1859170205223,-2.32794753422264,1.28122439032842,-1.81  
697097853867,0.0692215572179431,0.148872923299741,-4.43395367362804  
"Igv15-103",17.5752449863485,-2.60303057758714,1.08993758432685,-2.38  
823820282772,0.016929365083715,0.0505418405148178,-7.76992591176587  
"Igv1-99",3.70568421328232,-4.99111795302244,2.78575130958288,-1.7916  
5955548622,0.073187516890126,0.155413875443659,-9.29178239916177  
"Igv12-98",2.97355538654671,-0.440920110155151,1.78173197055621,-0.24  
746713728076,0.804546721342288,0.875540100057596,-0.0586045991908862  
"Igv4-92",1.17106178162646,-4.18826705965641,4.71998526889745,-0.8873

47485437122,NA,NA,NA

"Igkv4-91",8.86997368977945,-3.30102077224249,1.47094614612957,-2.2441  
479458159,0.0248228839527175,0.0680535139637354,-8.87136429922691

"Igkv4-90",2.30391748195726,-0.360665972425433,2.32029449415134,-0.155  
439739797921,0.876474657046691,0.922809161569004,-0.0289733163454397

"Igkv12-89",5.18727955040852,-4.1452871532613,2.19560608365228,-1.8879  
9219683606,0.0590269980176885,0.131879042895484,-8.39781337512701

"Igkv1-88",10.7541056530088,-5.38592508712984,2.10915261574386,-2.5535  
96665754,0.0106616679408338,0.0356571529177321,-17.9556267286583

"Igkv4-86",2.89285384809232,-4.83059580727848,2.43541967971308,-1.9834  
757218713,0.0473143163198974,0.111605920591019,-10.592439567389

"Igkv13-84",2.78396085955611,-0.351444876032341,1.73537828953816,-0.20  
2517732387831,0.839511997168918,0.897124821651609,-0.0381529513462725

"Igkv4-81",0.251331031128429,0,4.7847199059551,0,1,NA,NA

"Igkv4-80",28.8922035327418,-3.62571789629333,2.17591913766692,-1.6662  
9257196612,NA,NA,NA

"Igkv4-79",25.5043927126287,-22.5980230475715,3.12897791188703,-7.2221  
7404019418,NA,NA,NA

"Igkv4-74",5.76480212879968,-1.86711649084542,1.93435807407268,-0.9652  
38295779599,0.334425469721319,0.479106759883857,-1.37388373615222

"Igkv4-72",24.3456442349065,-3.33286283939419,1.23548897631989,-2.6976  
0629457147,0.00698399841993405,0.0256980564619502,-12.2027437417254

"Igkv4-70",39.9404101556263,-7.03260207526244,2.59181699858131,-2.7133  
8681670499,0.00665993148134081,0.0247986413863439,-25.9992936479893

"Igkv4-69",0.644258357435702,-0.529170761573354,2.26431979282903,-0.23  
3699658170726,0.815218153146637,NA,NA

"Igkv4-68",10.2033452515824,-1.56661585620368,1.25126383398686,-1.2520  
2680174334,0.21056009796474,0.344392315251783,-1.66997148889174

"Igkv4-63",2.32238780801184,-2.68801221847844,1.78298177347365,-1.5075  
9377267306,0.131658527531612,0.242337200963974,-3.81005606897831

"Igkv4-61",104.467376586599,-5.63427485203577,2.1789519939071,-2.58577  
2824638,NA,NA,NA

"Igkv4-57-1",27.8672348509855,-5.06405983632037,1.46471189838115,-3.45  
737604911747,0.000545463106060045,0.00369928335372479,-28.356791326440

5

"Igkv4-57",17.9813161071071,-1.91002444067769,1.31098925740676,-1.4569  
3370856132,0.145134680075283,0.261394979415201,-2.56272312000337

"Igkv4-50",3.4851487555118,-1.05673498387686,1.85079006104269,-0.57096  
4263381404,0.568023867578985,0.695075271121819,-0.384371642557947

"Igkv5-48",48.5209046455593,-2.730060089798,0.988742504472558,-2.76114  
365211228,0.00575993352570804,0.0221033623074701,-10.4070587919245

"Igkv12-46",38.6079849809043,-2.76519552489176,1.52784499244688,-1.809  
86653656746,0.0703164866145203,0.150578341431355,-5.23526667877684

"Igkv5-39",38.1870802296047,-4.6644733552178,1.81554307041884,-2.56918  
903837502,NA,NA,NA

"Igkv12-38",1.7421719107681,-1.2855097023405,2.08482925360477,-0.61660  
1911220208,0.53749733360431,0.668929789405556,-0.516872821385386

"Igkv7-33",0.253320664103069,-1.24642654913759,4.77444171864865,-0.261  
062260801954,0.794044494243145,NA,NA

"Igkv6-32",9.48259204369343,-0.92508613682848,0.83715255540059,-1.1050

3889746333,0.269142734864561,0.411454078806846,-0.821530014737079  
"Igv8-30",25.1005442609842,-3.02923348918811,1.10080945681769,-2.7518  
236425269,0.00592644270104238,0.0226176903082647,-11.4778351263073  
"Igv6-29",0.163632306263339,1.41740481992539,4.78471990596584,0.29623  
5693579073,0.76705009193086,NA,NA  
"Igv8-27",14.6783364800224,-1.97101113266256,0.976245961110424,-2.018  
96982029062,0.0434903563856007,0.104610778288483,-4.44957475957764  
"Igv8-24",23.5059731204549,-0.719914869947406,1.40033791083189,-0.514  
100821222309,0.607181503292413,0.727602787240825,-0.228932929804643  
"Igv8-21",26.2538667779756,-4.55242128305757,1.49642665167074,-3.0421  
9473635736,NA,NA,NA  
"Igv6-20",45.0585752857238,-4.25236253068977,1.60932060185094,-2.6423  
3399224428,0.00823368174476336,0.0290939337911192,-15.0415655501249  
"Igv8-18",0.632923161052561,-0.522235378620692,4.78471990595092,-0.10  
9146489007887,0.913086302221328,NA,NA  
"Igv8-16",1.03579193227993,-1.99904096967525,2.81683681008095,-0.7096  
75818819551,0.477905190732086,NA,NA  
"Igv6-13",16.4823936305324,-7.86399936982694,1.98067024099466,-3.9703  
7286018786,NA,NA,NA  
"Igv3-10",5.4845850094775,-2.95448942390744,2.46651570802638,-1.19783  
928976942,NA,NA,NA  
"Igv3-7",5.02881196513804,1.48289162462249,1.95610715340242,0.7580830  
23234781,NA,NA,NA  
"Igc",11074.9293062189,-2.29327706561298,0.776801835187908,-2.9522034  
6004749,0.00315514960378881,0.0140390476893369,-9.78291978422604  
"Ighg2c",1809.12067803298,-4.80789461353652,1.63382796878873,-2.942717  
78019624,NA,NA,NA  
"Ighg2b",587.056182420354,-1.60618943067771,1.13933993555579,-1.409754  
35035039,0.158612230162865,0.279647460323315,-2.04664759365446  
"Ighg1",118.83898225887,-0.278053167695557,1.14477263415416,-0.2428894  
25725137,NA,NA,NA  
"Ighg3",235.021063045001,-4.89985251280554,1.68868907663461,-2.9015717  
4615617,0.00371295744847954,0.0158866017841681,-20.2965570492232  
"Ighm",7586.72734172633,-2.47900192611928,0.74895421766448,-3.30995121  
951478,0.000933122317386102,0.0055662270292408,-12.868592774491  
"Ighv5-2",0.377335418150917,0.4.78471990594057,0,1,NA,NA  
"Ighv7-3",3.10066992053621,-0.372043922482423,1.02202203506743,-0.3640  
27300505195,0.715837623126107,0.811618420405468,-0.0776548583740773  
"Ighv4-1",6.41818933916892,-2.06514998988604,1.44659216564389,-1.42759  
655342584,0.153408016223265,0.272790652104078,-2.68273437492088  
"Ighv7-1",2.06177110794878,-4.72577818836767,3.024437994051,-1.5625310  
2151976,0.11816294376199,0.22385746963382,-7.07328830511871  
"Ighv14-4",7.00882164391518,-5.54099811248515,1.89092865970938,-2.9303  
0521486556,0.00338629218495588,0.0148306210741846,-23.3334824052745  
"Ighv7-4",0.794967659913678,-3.27866306149306,4.72736587616271,-0.6935  
4967383113,0.487964663856873,NA,NA  
"Ighv3-5",0.308535944078607,-2.27258726598183,4.74286684614589,-0.4791  
58985420086,0.631825529764044,NA,NA  
"Ighv13-2",1.44788774769928,-0.35431507551284,2.52016426169414,-0.1405  
92056199804,0.888192224137048,0.930645719183114,-0.0254669672304823

"Ighv3-6",24.1268269620518,-1.15107437315615,0.961997869186579,-1.19654565776683,0.2314836923402,0.368446451693814,-1.14930159450761  
"Ighv3-8",3.16366474270321,-2.07404056898248,1.45330388436717,-1.42712105244637,0.15354500527699,0.272984454535493,-2.69281072108384  
"Ighv12-3",0.580956325866411,-2.66403120074572,3.73040797932319,-0.714139369074868,0.475141003902525,NA,NA  
"Ighv6-3",20.2663947391385,-1.16636457906131,1.0454722761875,-1.11563415465656,0.26457876603516,0.406499985717858,-1.04992801869866  
"Ighv6-6",4.31824178882067,0.776567648612295,1.32482250742591,0.586167312420699,0.557763085554938,0.686782595104151,0.291785580886894  
"Ighv15-2",0.0838789263846049,-0.0661761530403213,4.78471990596623,-0.0138307266341346,0.988965028566501,NA,NA  
"Ighv1-18",9.76506782218256,-1.50768868329092,1.08859154432229,-1.38499025750705,0.166055446401434,0.288981532839626,-1.87163341339981  
"Ighv1-47",0.848450836509834,-2.97000703284474,2.69216757719561,-1.1032028830607,0.269939069603451,NA,NA  
"Ighv1-49",0.197329541459206,0,4.78471990594883,0,1,NA,NA  
"Ighv8-12",6.56298462578332,-2.79919122517473,2.00305955153004,-1.39745781548859,0.16227594364371,0.284337714145405,-3.52024220705993  
"Trgv7",0.222710160105464,-0.539472998571456,4.7847199059654,-0.112749128302968,0.910229450792267,NA,NA  
"Trgv4",2.20781600839775,-2.17795286940655,1.68381771699334,-1.29346119085595,0.195851598331063,0.326553314884477,-2.43748220129519  
"Trgv6",0.581900741017744,-2.71159911950994,3.65873189611318,-0.741130860774627,0.458614099426055,NA,NA  
"Trgv5",0.126029814732675,-0.572498166581552,4.78471990596623,-0.119651343826351,0.904759345353276,NA,NA  
"Trgc1",33.1020108949349,-0.98032463822259,0.626759100558448,-1.56411711828215,0.117790066564713,0.223252712441978,-1.4699486703913  
"Trgc2",57.3198823635358,-1.2229333252132,0.531454831121303,-2.30110491729459,0.0213857014614586,0.0605985186884931,-3.42847502569118  
"Trgv2",4.4990732161232,-1.17808309960933,1.16535051106384,-1.0109259732798,0.312051861661356,0.457189897930565,-0.922034328087235  
"Trgv1",0.638569964101611,-1.26783301894583,2.90654528585181,-0.436199299944599,0.662692135812445,NA,NA  
"Trgc4",27.7856196159047,-1.93302785740164,0.497396747624139,-3.886289700596,0.000101788025854095,0.00100438407292669,-13.3444273736636  
"Trav1",0.897263992306915,-1.0020388800436,2.59139006200031,-0.386680065937323,0.698993075463463,NA,NA  
"Trav2",0.0977231987562172,-0.149802970403459,4.78471990596623,-0.0313086185497848,0.975023417169987,NA,NA  
"Trav3-1",0.111986802044757,-0.538711890826009,4.78471990596623,-0.1125900578118,0.91035556764406,NA,NA  
"Trav5-1",0.358921850784994,-2.32075247175339,4.74185340256548,-0.489418856875204,0.624545188621485,NA,NA  
"Trav6-1",0.18121394279552,-0.541606668236383,4.78471990596378,-0.113195062382087,0.909875910157544,NA,NA  
"Trav6-2",0.196308176813057,-0.549415354255742,4.78471990595402,-0.114827067217051,0.908582194418852,NA,NA  
"Trav8d-1",0.202715174640625,0.869054415947073,4.78471990596341,0.1816

31199532481,0.855872162405518,NA,NA  
"Trav13d-1",0.164625285844773,0.385475183411966,4.78471990596623,0.080  
563792863048,0.935788861679452,NA,NA  
"Trav8d-2",0.35777239821687,-0.541664118668037,3.90222726995481,-0.138  
808962470889,0.889601111525799,NA,NA  
"Trav16d-  
dv11",0.121018421815005,-0.535005481850078,4.78471990596623,-0.1118154  
23340238,0.910969758158219,NA,NA  
"Trav6n-6",0.398231198083775,-0.141513226875364,3.78694014725956,-0.03  
73687519138032,0.970190987621071,NA,NA  
"Trav8n-2",1.31809655019975,-3.1088673475038,2.20235481910213,-1.41161  
057271019,0.158064657594456,NA,NA  
"Trav16n",1.40015827206648,-0.632307930722272,2.13751652599902,-0.2958  
14288699708,0.767371910302496,0.849739749379717,-0.102955635929653  
"Trav13n-4",0.196584893836897,-0.546440464891117,4.78471990596623,-0.1  
14205319356258,0.90907503526481,NA,NA  
"Trav14n-3",0.627110767761326,0.26492675118784,2.32082223476028,0.1141  
52108343276,0.909117215664201,NA,NA  
"Trav4-2",0.13333781980132,-0.0518788885950879,4.78471990596623,-0.010  
8426176693015,0.991349012268394,NA,NA  
"Trav8-1",0.540839988624357,-2.2432721192463,3.05360368916433,-0.73463  
1061393632,0.462564215645311,NA,NA  
"Trav13-1",0.880548573341915,-0.373909152966537,1.90061716993945,-0.19  
6730387834205,0.844038528722616,NA,NA  
"Trav14-1",0.273093008388534,-0.944262718961583,4.75574193030748,-0.19  
8552136091315,0.842613097897965,NA,NA  
"Trav13-2",0.387705885660762,0.407381405475344,3.24271236204261,0.1256  
29830830488,0.900024948441962,NA,NA  
"Trav15-2-  
dv6-2",0.214167119266423,-1.01677242428256,4.78099749811679,-0.2126695  
16075476,0.831584745475855,NA,NA  
"Trav16",0.889133769955028,-3.42856000165616,2.20565725800648,-1.55443  
915377631,0.120079699882331,NA,NA  
"Trav3-4",6.38182506224533,0.500419698984999,0.841265804737554,0.59484  
1364247669,0.551949514978672,0.681867302987654,0.191620816458312  
"Trav18",0.091991025955798,0,4.78471990596463,0,1,NA,NA  
"Trav19",0.683131988356062,-2.991866528331,1.95903239795703,-1.5272164  
622959,0.126707194056488,NA,NA  
"Trav21-  
dv12",0.52049975866705,-1.5009639866181,2.60753361668708,-0.5756259390  
14777,0.564868044431679,NA,NA  
"Trdv1",0.117219013045971,-0.0515486017301778,4.7847199059601,-0.01077  
35881605036,0.991404086630841,NA,NA  
"Trdv2-2",0.603529217428885,-2.68130854343385,2.57002675251322,-1.0432  
998570197,0.296809437301816,NA,NA  
"Trdv4",1.98311362190389,-2.59304677495691,1.74792789994642,-1.4834975  
6018907,0.137942264195948,0.251458327158993,-3.57964402671323  
"Trdv5",0.465837017267451,0,3.65384118758817,0,1,NA,NA  
"Traj49",0.0825841185902447,-0.077342504998692,4.78471990596623,-0.016  
1644791165834,0.987103173318039,NA,NA

"Trac",529.514924293088,-1.54208825097714,0.423325666152282,-3.6427941  
2820296,0.000269694533766618,0.00213067423799899,-9.48587337409074  
"Iglv1",161.699848940155,-1.78307194256759,0.876749587187207,-2.033730  
00526644,0.0419788251359393,0.101618482247067,-4.0770472187057  
"Iglc2",225.479649956403,-2.92634779290111,0.806105385340364,-3.630229  
80136215,0.000283168997121604,0.00220408347540002,-17.9017673251212  
"Iglv3",10.2601581626855,-3.17048439276283,1.6418229766636,-1.93107566  
274024,0.0534736962008056,0.122360066720257,-6.66051307583827  
"Iglv2",24.5896331410865,-3.24630526827693,1.1411138250169,-2.84485666  
294408,0.00444314121004663,0.0181391053838964,-13.0166620357534  
"Rab11b",6925.43518523568,-0.114939573819852,0.150105412229277,-0.7657  
25713102794,0.443839524034849,0.58512278375967,-0.0615999757872801  
"Gm10913",0.425630646882101,-1.18220060979651,3.80796470103079,-0.3104  
54718626068,0.756215188727377,NA,NA  
"Gm10916",0.4754344523387,-1.0675986184224,3.21830681029749,-0.3317267  
99634656,0.740095562314044,NA,NA  
"Rpl23a-  
ps3",1.88627095053598,-0.931276155111703,1.04590030819293,-0.890406234  
529874,0.373247795925627,0.518462851644006,-0.611743106292145  
"Fam170b",0.95788263966858,-3.16670284010148,1.76156516666359,-1.79766  
431581933,0.0722302195200617,NA,NA  
"Gm2178",0.118587540758437,1.32787626362674,4.78471990596623,0.2775243  
46194427,0.781377514152993,NA,NA  
"Actl10",0.758194014240466,-2.48378581328874,2.15275706424968,-1.15376  
967263811,0.248594610856731,NA,NA  
"Gm12355",0.506831226234358,-0.548033005011597,3.62554544404055,-0.151  
158774168014,0.879850469996055,NA,NA  
"Ankrd63",3.42745234918897,-0.969613000983355,0.964467870150008,-1.005  
33468350018,0.314735719575128,0.459992654860093,-0.752947892544808  
"AK157302",0.445414868407742,-2.42487913646343,3.07048833896581,-0.789  
737288916123,0.429681209506517,NA,NA  
"Gm2399",2.13987106791488,-1.62397277111918,1.40393215674295,-1.156731  
65780796,0.247382011324433,0.386711653716331,-1.54289746436234  
"Capns2",6.01388827490733,-1.30969501763729,0.921634265664211,-1.42105  
720938382,0.155300128494411,0.275376673825394,-1.68900285819263  
"Psme2b",347.480364874622,-0.373995416571202,0.351116976898916,-1.0651  
5902442072,0.286803972715702,0.430824642527794,-0.314924386453886  
"Gm12184",120.288457916037,0.0554682586986399,0.295324557112151,0.1878  
2135573499,0.851016694236087,0.90524528414827,0.0055218285331261  
"Fem1a1",21.763613779001,0.816235082319623,0.543041556507668,1.5030803  
306636,0.132818330295852,0.244011288430088,1.1513328784133  
"Erich3",30.1552402265984,1.18853010965292,0.495181184839275,2.4001923  
8622464,0.0163864570399711,0.0493898808726785,3.5751101180759  
"Lenep",122.944574062205,0.664798807152504,0.781103040569222,0.8511025  
72418662,0.394712376589522,0.538980455125884,0.410896167647184  
"Gm4877",0.0831298681997379,-0.0544124280391055,4.78471990596623,-0.01  
13721239923066,0.990926553414313,NA,NA  
"Gm20900",1.3711308212451,-0.579273253792877,1.2892357764371,-0.449315  
217883374,0.653204281455265,0.763742928748787,-0.156128060172839  
"Gm15610",0.280939333105489,-0.07765209130477,4.78471990595724,-0.0162



291822365796,0.987051554468786,NA,NA  
"Rbm8a2",27.4453929133915,0.0481166471051222,0.494530980377123,0.09729  
75385049266,0.922490110716133,0.952282516875432,0.00235259257437357  
"Chml",430.966335012034,-0.539204638645192,0.149156991730961,-3.615014  
16988734,0.000300331194371917,0.00231182693559559,-3.27281966185857  
"Gm2000",390.742612642372,0.880847967572123,0.56999838929821,1.5453516  
783734,0.122261221685006,0.229857226922597,1.29510804958366  
"Gm17374",0.413451554617361,1.74149693812616,2.59980004747782,0.669858  
029972597,0.502948296735303,NA,NA  
"Tmem203",527.906014267944,0.206978996309217,0.255122199055317,0.81129  
3556874441,0.417197109279538,0.56049812145886,0.119826223666462  
"Nrarp",1081.99289412987,-1.61126343972723,0.440362921640787,-3.658944  
38551656,0.000253256287204233,0.002025427025393,-9.99301512676099  
"Klhdc7a",6218.45394770933,-0.56905606182298,0.431989040640338,-1.3172  
9282062218,0.187740490794992,0.316657793211139,-0.654376688554773  
"Fam43b",0.469643775310707,-2.16545162064729,2.60252124624121,-0.83205  
9151783996,0.40537555710049,NA,NA  
"Gm12854",7.89381996870362,-0.582065620741494,1.06711680337401,-0.5454  
56335146366,0.585439703981958,0.709262438520792,-0.199956809376521  
"Gm3550",0.634793590301088,0.248463624081151,2.87378878732217,0.086458  
5543576682,0.931101901486654,NA,NA  
"Hmga1b",1.44868608458387,-3.68270219080028,2.75162083154108,-1.338375  
60342125,0.180774027628469,0.308537464171908,-4.33053371048577  
"Gm16487",0.80798799640183,3.22683725005717,1.68009088828486,1.9206325  
5182065,0.0547780483165269,NA,NA  
"Gm10923",0.422721160263035,0.690389606524687,3.57863844360596,0.19291  
9630581352,0.847021910842615,NA,NA  
"Gm2606",11.4203702400694,-0.862622733375091,0.625500529661721,-1.3790  
9193113171,0.16786641134066,0.291560599351523,-1.06318890815795  
"Foxd1",342.6144698981,-0.99511262752524,0.318661991539377,-3.12278418  
495441,0.00179149059529457,0.00918515849937256,-4.66724371443907  
"AI593442",13.3822727293884,-0.977989553330319,0.701485580162634,-1.39  
416914757332,0.163266532241693,0.28560657147394,-1.22555786741161  
"F8a",570.758069316642,0.195455704798743,0.261290980600841,0.748038467  
877042,0.454436954908964,0.594700974930064,0.101577657984362  
"Sf3b5",2098.70862535075,0.261900481677641,0.201645824750341,1.2988143  
0474398,0.194007664289391,0.324394257637814,0.294846425201352  
"Smim1",3446.19396921292,1.03287287084355,0.280228354111118,3.68582570  
496772,0.000227962331235058,0.00187551751242224,6.48527515497166  
"Ifna2",0.189927915381104,-0.0609903347341921,4.78471990596445,-0.0127  
468976100699,0.989829722616409,NA,NA  
"Mos",3.21140169666244,-0.804100250540976,1.26138610757995,-0.63747352  
6709193,0.523816448540706,0.656724094241685,-0.338117156931959  
"Gm6316",0.945981167356963,0.511108778665723,1.74646643253188,0.292653  
078894141,0.769787337925196,NA,NA  
"Gm4294",13.0384988104997,-3.38425716368425,1.57192774566633,-2.152934  
30185602,0.0313238421970186,0.0812278594437383,-8.49616743655845  
"Sarnp",1762.88749683553,-0.210881439756467,0.193803985308795,-1.08811  
714795474,0.276543394460457,0.420104643957148,-0.182887233660168  
"Ctdsp2",10248.6907562434,-0.289365154034769,0.110144437690156,-2.6271

4268739354,0.00861052194100556,0.0300712801013302,-1.01398894900484  
"AU041133",217.543547373272,-0.061157747312186,0.149636439923849,-0.40  
8708917047942,0.682753289097161,0.786556295199437,-0.0146834236204976  
"Smim24",2437.39933094992,1.90551681847517,0.5200624081535,3.664015680  
8118,0.000248291574302139,0.001998839436723,11.8431463091406  
"Dohh",1785.47609697696,0.255207694275343,0.192501668572477,1.32574276  
455821,0.184924917110321,0.313186787539992,0.296284776600198  
"Ccdc105",0.527663163986313,-1.39125610390308,4.7421182752698,-0.29338  
2835084165,0.769229544126556,NA,NA  
"Ppil6",155.899733463583,1.7261712938176,0.36728688074376,4.6997902302  
4748,2.60428861893079e-06,5.88394200369786e-05,16.8141141650414  
"Raet1d",6.11403929398039,-1.18048351455389,0.78187300049507,-1.509814  
9108697,0.131090659212712,0.241559289207569,-1.67704249210199  
"Abracl",2009.97532100739,0.134064114358829,0.236463413067388,0.566955  
000013567,0.570744755282929,0.697376796331572,0.0483206505752705  
"Plekhn1",2605.49376293522,-0.401164487374848,0.210339800340504,-1.907  
22101440351,0.0564919733443542,0.127707883625301,-0.825600439342411  
"Perm1",124.947702347123,1.04137491202637,0.445877392958741,2.33556338  
238196,0.0195140089064449,0.0563763736342958,2.99468716160259  
"Ankrd65",83.6447031115775,1.87200475851777,0.629849251727554,2.972147  
30887307,0.00295724758956437,0.0133910058387729,8.07427851475772  
"Cfap74",204.329396666039,0.550440483553483,0.175694286791661,3.132944  
69390572,0.00173062048423703,0.0089624537056185,2.59516793388663  
"Gm13090",0.135196401973943,0.87255389390206,4.78471990596623,0.182362  
585699958,0.855298185716236,NA,NA  
"Zfp984",914.397233408427,-0.188765185975102,0.147064494093848,-1.2835  
53771005,0.199298133886858,0.330714138460108,-0.208868849449611  
"Zfp982",74.0436385511018,-2.06332255640951,0.513698418473415,-4.01660  
289813854,5.90430901067461e-05,0.00065859391927994,-15.114670113063  
"Zfp978",1.79738217044624,-3.20887630322728,2.26817825040425,-1.414737  
26884356,0.157145542856051,0.277815195811705,-4.10992604038303  
"Zfp988",8.64947035187289,-0.0496256423392084,0.620055096368055,-0.080  
0342463595387,0.936210018666902,0.960192674975922,-0.00201585867875211  
"Zfp986",1.2938024475507,-2.35394316130456,1.79644788727394,-1.3103320  
046075,0.190083545005436,NA,NA  
"Gm13212",165.466290863599,-1.05767130434843,0.323093712166491,-3.2735  
743981406,0.00106196430308299,0.00616989868340646,-5.38150866061519  
"Zfp990",26.1138087772636,-1.00892219015813,0.576194288844541,-1.75101  
039647815,0.0799441192093352,0.166201852090095,-1.81056358932872  
"Aadacl4fm4",4.76643607956394,-2.70113613537326,1.59822585854192,-1.69  
008411479309,0.0910118634836223,0.183573973584352,-4.57879733643795  
"Ddi2",5553.63154074381,-0.0406147436318958,0.134815829116343,-0.30126  
0941672111,0.763215522193466,0.846435143150457,-0.00677135902233308  
"Emc1",2673.43181919206,-0.35057362786228,0.174400712261164,-2.0101616  
7489785,0.044414080217484,0.10624288260097,-0.785995700666681  
"Aunip",25.4346482614599,-0.784142648194645,0.515359495290172,-1.52154  
49707648,0.128123134984354,0.237645709614936,-1.12679285609219  
"Gm17068",0.406447856116098,-0.949210666064877,2.68439349273996,-0.353  
603400035074,0.723636125927168,NA,NA  
"Nkain1",147.242263975503,1.11026296504154,0.280386344979892,3.9597611

8281067,7.50247519124962e-05,0.000789440158008554,7.93192571346853  
"B020031M17Rik",0.406077530918203,1.24268961232147,4.68478673436959,0.  
265260658122295,0.790808669468513,NA,NA  
"Zfp995",179.678820247306,-0.457341971804228,0.172748021827402,-2.6474  
5128173551,0.00811010444861239,0.0287876964389303,-1.62256113590188  
"Dcdc2b",86.2252876977705,-0.146384270840196,0.221953182872972,-0.6595  
27693837914,0.50955696847995,0.643855989334591,-0.0644500955929638  
"Fam229a",8.8343061129751,-0.0603833030917755,0.557791081341989,-0.108  
254335918207,0.913793944328686,0.946965417301128,-0.00329044949961912  
"Bnip3",5539.17202946895,0.370140074120168,0.49465380988326,0.74828105  
3788957,0.454290649971554,0.594600194209933,0.192423255242695  
"1110065P20Rik",950.646250406465,0.608424996802937,0.193924084456921,3  
.13743905769525,0.00170430700230065,0.00888190078805025,2.874041307109  
91  
"Ndufaf8",938.389625391056,0.324364354873576,0.313437174743731,1.03486  
242542474,0.300733164522297,0.445318476556219,0.262399596894115  
"Ube2d3",12544.9820926752,-0.166579197455921,0.198398948368506,-0.8396  
1734084657,0.401122973252168,0.545138058999844,-0.101066297201929  
"E430018J23Rik",322.971464284686,0.219252202242841,0.132814016463802,1  
.65082126179504,0.0987750772920234,0.195464980923564,0.357901603441771  
"AU022252",1629.62764672449,0.576200454887493,0.202430435017699,2.8464  
1217530908,0.00442149236720096,0.0180734293869359,2.31247243563392  
"Gm11735",0.135008700536434,1.37980002353348,4.78471990596623,0.288376  
341907279,0.773058675297569,NA,NA  
"Ccdc24",102.619025962907,0.293015391779104,0.507171787592218,0.577743  
870908486,0.563437055345948,0.69141517434296,0.108127017502529  
"Hs3st4",5.96992136939171,-0.293021781824441,0.656701349606911,-0.4462  
02496766358,0.655450979557626,0.765360114948772,-0.0783566081568777  
"Gm4609",64.7597495501293,1.89765037347739,0.610066743908269,3.1105619  
0560475,0.00186731750120847,0.00946670739432209,8.84300162973523  
"Cyp4a12b",388.501439268243,2.70307477058499,0.988197659275551,2.73535  
840245424,0.0062312388849239,0.0235504353127052,10.1327757487591  
"Skint8",46.2372288067612,-0.256442871148045,0.307177938534891,-0.8348  
34924575538,0.40381065892473,0.547627378078758,-0.154419688098279  
"E030025P04Rik",0.76742600898649,-0.945208851814779,2.09378680643717,-  
0.451435097837475,0.651675992058901,NA,NA  
"Gm4070",2195.86267743131,-1.04819570583276,0.299875005380925,-3.49544  
205760418,0.000473277198325955,0.00330653032062436,-5.98714280668006  
"1810010H24Rik",90.9212970384163,-0.793817516981973,0.291024520169095,  
-2.72766540950137,0.00637842694967182,0.0239779863672454,-2.9614307941  
4081  
"Gm5901",0.823383654561706,3.684280497791,3.3887500700713,1.0872092723  
3016,0.276944333909563,NA,NA  
"Fyb2",271.10286935895,-0.565467996060376,0.447649745072753,-1.2631929  
3663057,0.206519850659962,0.339523977295054,-0.610824585031909  
"Trim30c",7.16388834467225,-1.18566600312157,0.851489322912016,-1.3924  
6138644076,0.163782726703033,0.286278404774158,-1.48301977096215  
"Smarcd2",3367.08765287789,-0.261973061659976,0.078984252522258,-3.316  
7758546066,0.00091062641447809,0.00548344466630445,-1.36383746654597  
"Ccdc47",5248.03147498854,0.219452594464169,0.165022148515374,1.329837

21541915,0.183571911277771,0.311693978928332,0.255823221119174  
"Olfr613",147.163793571387,0.561826899955238,0.23134187986857,2.428556  
81934643,0.0151590496076164,0.0465173354185246,1.7236457310537  
"Gm12789",5.07988229398165,-0.303397326566,0.796925318580018,-0.380709  
860124159,0.703418551581245,0.803047890317414,-0.0665474510294675  
"Gm12790",0.517305604072354,-0.531192843894999,3.07246191888945,-0.172  
888340984548,0.862739196198057,NA,NA  
"March10",21.7900310267608,1.55012980322857,0.928612629142469,1.669296  
49089529,0.0950586353294944,0.18996138891611,2.57466398239424  
"Tomt",11.099014252052,0.112783973891484,0.760482569108601,0.148305797  
493404,0.882101440219205,0.926482109534263,0.00861224550768955  
"Gm7336",121.399812698436,1.56955535894809,0.878224286732118,1.7871919  
31105,0.0739064730062776,0.156616499367069,2.90988522685681  
"Gm12695",0.0898126250377202,0,4.78471990596623,0,1,NA,NA  
"Gm11627",39.8920804568951,-1.33128717633936,0.411274506319544,-3.2369  
7957418495,0.00120802058016027,0.00679180659514559,-6.64583658026559  
"G6pc",12764.6080437293,1.76452980388036,1.0909517617611,1.61742238816  
492,0.105787136301055,0.205626316777787,2.79094753354566  
"Aoc2",332.497711690034,0.324385781205759,0.184769093998533,1.75562792  
55682,0.0791519607380472,0.16495349834015,0.584572915164808  
"Psme3",3224.89829725232,-0.168499040515846,0.189693604123019,-0.88826  
9487497177,0.37439580854053,0.519511336889512,-0.110344401514641  
"Cntd1",149.140021824776,1.18926333442233,0.232025947973206,5.12556179  
51819,2.96651845791682e-07,1.05756066307006e-05,13.6253430109826  
"Vps25",3770.3640319314,0.157285144438312,0.15899789823138,0.989227821  
171725,0.322551689393534,0.46766157345294,0.119538342125422  
"Sprr2a1",572.81077763656,-2.45225986318839,1.03460337873537,-2.370241  
4989074,0.0177764697953936,0.052476246490626,-7.2277776246333  
"Fam174b",1169.96966204979,-0.670591165090316,0.277188974276125,-2.419  
25627396096,0.0155522789721057,0.0474123112709966,-2.04454753369923  
"Chd2",3967.49141215073,0.275636814101631,0.243988857660424,1.12971066  
279286,0.258598162749417,0.399694568156015,0.252774009172124  
"Mup20",53.3596354264717,1.35415559984403,0.778144641115727,1.74023636  
261557,0.0818175230736341,0.169160500457647,2.4062089813902  
"Mup19",85.4889611040921,2.06396996675084,1.20390317222697,1.714398644  
64592,0.0864555372864182,0.176403313730701,3.58095146378861  
"Mup18",5.35662360723801,-1.02946796990807,2.09944566370047,-0.4903522  
80941409,0.623884637644076,0.741421506965575,-0.308002383558876  
"Mup16",18.0404066774985,1.45048997622149,1.18249927134793,1.226630756  
87824,0.219961403676081,0.355740498413755,1.49915935567376  
"Casc3",2715.98246695889,-0.226013182449777,0.0719345268877822,-3.1419  
2908785453,0.00167838679816244,0.00879000424135677,-1.06997806672068  
"Mup10",22.4425231093908,-0.256567760930287,1.38752979454385,-0.184909  
730903929,0.853299838452098,0.906584582069475,-0.0251618432689383  
"Tm2d3",1350.02429893787,0.332282320579489,0.222867788384336,1.4909391  
9308998,0.135977460196942,0.248499133107552,0.462641965526093  
"Mup1",12.3462605335923,1.63238855901865,1.2476104675088,1.30841204168  
331,0.190733590507823,0.320541591770516,1.85723904730328  
"5830417I10Rik",1373.0780717264,-0.318829277017205,0.189318678316771,-  
1.6840878029147,0.0921647012092107,0.185456876626582,-0.53720593672768

8

"Mup9", 14.187700999092, 2.51038251911545, 1.46784257971312, 1.71025323410  
777, NA, NA, NA  
"Mup8", 1.23336455478839, 0.488156088749347, 2.28303184804579, 0.213819219  
897083, 0.830688036241282, NA, NA  
"Mup2", 3.35721167799767, 2.8511102421764, 2.4646966369411, 1.156779377812  
14, 0.247362509311879, 0.386711653716331, 2.70877125620762  
"Mup6", 0.0836669429966302, -0.544048378937457, 4.78471990596623, -0.11370  
5376621746, 0.90947135024012, NA, NA  
"Gm6821", 0.124547664330452, -0.551233919761366, 4.78471990596623, -0.1152  
07144951999, 0.908280935535847, NA, NA  
"Cisd3", 3773.64770883527, 0.770481582150922, 0.382600152343707, 2.0138036  
4704811, 0.0440301526796124, 0.105541314181887, 1.73254556636091  
"Mrgpra3", 0.294579729475019, 0, 4.78471990595405, 0, 1, NA, NA  
"Tomm5", 2308.13081212611, 0.349490965253651, 0.288527557831399, 1.2112914  
5472432, 0.225783722611435, 0.361863846560386, 0.355253111002048  
"Tmem8b", 496.043028115024, -0.104661718867545, 0.21793606938027, -0.48024  
0463018189, 0.631056418051703, 0.746535289358386, -0.0305939171873065  
"Msmpl", 80.7883902692981, 0.659762726520457, 0.312584426120516, 2.11067049  
855544, 0.0348006434306999, 0.0880195804399775, 1.60335272855098  
"Fam205a1", 2.44397622228672, 0.0750561170827857, 1.36898235137178, 0.0548  
262123376361, 0.956276917379511, 0.973298916065444, 0.00203132124608086  
"Gm12394", 2.82859615665087, -0.879911705984887, 1.16526926916084, -0.7551  
14486644401, 0.450180291706603, 0.590886255650983, -0.462949477731383  
"Il11ra2", 8.32572577600956, -6.06718153328027, 4.5944368525877, -1.320549  
55328488, 0.186651602930495, 0.315366807100415, -7.00164185964133  
"Gm20878", 81.6444983582242, -0.620630832868067, 0.356897398294798, -1.738  
96149378882, 0.0820415363098553, 0.169471964717614, -1.1016617858471  
"Haus5", 893.423419144128, 0.0918625158639643, 0.224240410938582, 0.409660  
843375482, 0.68205475769966, 0.786153796822987, 0.0221023817871181  
"Slfn1", 289.610850457881, -1.18600382253497, 0.467618270801568, -2.536264  
93357922, 0.0112041934658382, 0.037033287709258, -3.90899518897133  
"U2af1l4", 1066.76621725586, 0.143666014309506, 0.17361686646029, 0.827488  
81049737, 0.407960061656009, 0.551584861117042, 0.0854754713672336  
"Zfp566", 205.971863895096, -0.262641537539186, 0.240086169354793, -1.0939  
4697014413, 0.273978236805571, 0.417020114069869, -0.229711757760388  
"Evi2a", 676.937350590975, -1.29386180332794, 0.398298062418626, -3.248476  
26792632, 0.00116024886951726, 0.0065846492166184, -6.49908623071286  
"Gm12353", 0.752287182724095, -0.551545337848476, 3.58074231278957, -0.154  
031005213216, 0.87758528868019, NA, NA  
"Rad54b", 84.3122108502522, -0.796753797835391, 0.521538960710033, -1.5276  
9756021808, 0.126587646168262, 0.235583270496208, -1.15185966551816  
"9530053A07Rik", 4.77829041725205, -0.732779359209101, 0.950485257565816,  
-0.770952893141912, 0.440734853872572, 0.582448704134974, -0.396077619068  
716  
"Zfp59", 253.815965557297, -0.442726732170972, 0.15262099433543, -2.900824  
58248141, 0.00372182162191537, 0.0159100221853892, -1.83324552761831  
"Gm5150", 9.04225587985304, -0.775755983848865, 0.531833969083533, -1.4586  
4316486903, 0.144663346594098, 0.260760463334725, -1.0427347780024  
"Gm9733", 16.5154633069417, -1.30722590434666, 0.735542888003224, -1.77722

59451728,0.0755310722923342,0.15907375756707,-2.40318750111295  
"Rbis",1937.77628296446,0.238577289544469,0.184986431237137,1.28970156  
323862,0.197154296630972,0.328218360386058,0.265793270411747  
"BC024978",592.464322577048,-0.325639141754413,0.204770218167932,-1.59  
026612691966,0.111774830482754,0.214446013575439,-0.501385693414152  
"Cyp2t4",0.0983898136351888,-0.544048378937457,4.78471990596623,-0.113  
705376621746,0.90947135024012,NA,NA  
"Dph1",547.364659811778,0.360512920387779,0.160301902329461,2.24896220  
911236,0.0245149005148679,0.0673512089951942,0.97260416740778  
"Dact3",830.14660227224,-1.40131888095586,0.264069949035785,-5.3066200  
3030856,1.11676632478368e-07,4.92640493226973e-06,-17.1253793956888  
"Ceacam15",1.06541071620164,1.79320964328161,1.78158111548039,1.006527  
08299397,0.314162090421106,NA,NA  
"Zfp541",2.34796368219427,-2.34184599803835,1.38320405429106,-1.693058  
94583907,0.0904442477084099,0.182763181865331,-3.98011727443728  
"Sult2a1",0.113058343341289,2.23400583696369,4.75316341366045,0.470004  
004184502,0.638352156775581,NA,NA  
"Vmn1r58",386.527315239793,0.679765680503255,0.273420103010953,2.48615  
838051975,0.0129130482020082,0.0411470197487754,2.16886294875582  
"Gp6",5.65829848994486,0.148256705924688,0.715536994891721,0.207196423  
082392,0.835856460671086,0.895173529065409,0.0164176054786986  
"Eif5a",16804.8163572812,0.0255322154624426,0.304795864656077,0.083768  
2476146862,0.933240693993001,0.958407618849443,0.00108466218416051  
"Leng1",1268.30059019785,0.287173035311988,0.19399886964861,1.48028200  
283922,0.138798004101398,0.252573890455219,0.395164868083864  
"Cacng6",1.33028579299284,-2.06130893981031,1.99386342064116,-1.033826  
54923649,0.3012172576484,0.4459140604076,-1.66477295030436  
"Prkcg",6.96398077925309,-0.396053052743068,1.68653226847368,-0.234832  
775006136,0.814338528179625,0.881864627739313,-0.049790489962115  
"Nlrp12",1.98491303282632,0.413183399795516,1.21074876455765,0.3412627  
06096153,0.732905820734703,0.825259742012315,0.0793548069360325  
"H2aw",1682.08095891222,0.249418716037312,0.157452888481952,1.58408472  
808615,0.113174439244108,0.216595525753986,0.381541696540873  
"IgtP",2012.31115664367,-0.72592020923488,0.448863904437717,-1.6172389  
9395347,0.105826702190301,0.205662218609238,-1.14805745379466  
"Zfp931",389.198292950152,-0.346872688216929,0.284324990750898,-1.2199  
8663325669,0.222469942086465,0.358370698182575,-0.355956367666405  
"Gm14326",309.715168950014,-0.387957559111895,0.330535584640587,-1.173  
7240319639,0.240505581128484,0.378817175930462,-0.376591013931824  
"Gm14322",149.561209252823,-0.329510099763259,0.304076297585669,-1.083  
64283036702,0.278523192753037,0.422256839460284,-0.284084340166297  
"Gm14406",1.08399541265843,1.8687328182639,4.08517321407345,0.45744273  
7513823,0.647352851895687,NA,NA  
"Zfp970",477.125545492662,-0.491279924399358,0.262319798489904,-1.8728  
2823190437,0.0610921081170155,0.135422228747791,-0.982244329681158  
"Gm14418",173.810048907879,-0.570979883971951,0.327476084756068,-1.743  
57734976972,0.081232815736834,0.168227862951538,-1.01773503849734  
"Gm14412",21.2869429709701,0.214479150609746,0.473899573179807,0.45258  
3548811022,0.650848647104608,0.762051070880455,0.058282929728021  
"Gm14409",7.37454413324919,-0.346280025939742,0.808742740889165,-0.428

170799479483,0.668526774099793,0.775842809439782,-0.0878877212677317  
"Gm14410",599.402321540419,0.29656671041909,0.196407340229897,1.509957  
36754011,0.131054302878031,0.241521436438171,0.421361106137896  
"Gm14401",24.6422556001138,-0.235745451002207,0.304010394673389,-0.775  
4519422123,0.438072652469725,0.580228284617533,-0.128324183868595  
"Gm14419",47.7911417656087,-0.193979567821078,0.393607634289179,-0.492  
824708980527,0.622136450191844,0.740201153639283,-0.0583555136134003  
"Gm14295",232.310272276405,-0.449727372711893,0.276916164835829,-1.624  
0560495214,0.104363846839276,0.203855568590684,-0.715221018801267  
"Gm14305",417.233005342185,-0.526592575234359,0.210321206169883,-2.503  
75406657289,0.0122883417836545,0.0396751263615988,-1.69933047389673  
"Zfp973",38.3388068087198,-0.0703716611300121,0.524127490035067,-0.134  
26439648358,0.89319350577202,0.93382853574598,-0.00481781549959846  
"Gm14308",416.273648133008,0.0125120633607687,0.22304920894396,0.05609  
55289642488,0.955265705701803,0.9724727577807,0.000349251932784305  
"Gm14434",293.236507293188,-0.289292946777626,0.28086726079082,-1.0299  
9881852759,0.303010560192696,0.447617236354056,-0.232538529265597  
"Gm2026",171.89667707249,0.250260012251597,0.31390120589744,0.79725725  
0210642,0.425301642742233,0.568331946418207,0.141409324387376  
"Gm6710",263.599681021514,-0.1773603406828,0.321347275547727,-0.551927  
320312564,0.580998149468959,0.705503905164123,-0.0618709084279713  
"Gm14288",260.854467021353,-0.579678522033201,0.723421005644691,-0.801  
301755838025,0.422956974624968,0.566168824058604,-0.329757645417958  
"2210418010Rik",1114.20724196285,-0.234834333436043,0.199394279087143,  
-1.17773857159368,0.23890084468189,0.3769595103672,-0.229108484563276  
"Zfp965",205.091813472921,-0.11563040776917,0.281422311390489,-0.41087  
8608728098,0.681161548560468,0.785456731553138,-0.0279235763906709  
"Gm4724",126.58463982485,-0.921914175772719,0.391626384056972,-2.35406  
554130072,0.018569336622204,0.0542581935351016,-2.68645907447918  
"Zfp968",80.8050090019489,0.003869446838486,0.482444933456457,0.008020  
49429924263,0.993600640038722,0.99595846332689,1.56701985163697e-05  
"Gm4631",6443.84910385384,-0.069529865916487,0.084254247696548,-0.8252  
38700924698,0.409236085620985,0.552811777569486,-0.0412129729059012  
"Gm14440",19.5006471319428,0.993157373915285,4.5682090433675,0.2174062  
88654245,0.827891730765302,0.890311233051782,0.115389172446164  
"Gm14443",162.194707773502,0.25124383926131,0.174647077240522,1.438580  
26845362,0.150269480153947,0.26843374475874,0.330423625682268  
"Gm14391",789.923819384524,-0.209758836764296,0.304895053390407,-0.687  
97061294303,0.491471287480808,0.627839033171774,-0.0976367524106654  
"Gm14393",6.60109251806684,-0.6256376097636,0.809136219924125,-0.77321  
6665325237,0.439394164903987,0.581307329847872,-0.339393197142144  
"Gm14444",9.30262818555689,-0.215908831343618,0.603676800827596,-0.357  
656333732923,0.720600514881936,0.815264525888823,-0.0440977911725927  
"Fam186b",5.75332669089268,1.36179516696325,0.984743649151256,1.382893  
06880727,0.166697655894739,0.289840457877263,1.68648070661038  
"Mon1b",1064.37560326446,-0.365925116403241,0.173504123171802,-2.10902  
836032839,0.0349421337353408,0.0882972684774073,-0.888117129008286  
"Hsp25-  
ps1",1.22414397502231,-3.37159670505613,2.94188785396287,-1.1460656804  
1485,0.251767976615165,NA,NA

"Gm11281",0.10545741159289,0,4.78471990596623,0,1,NA,NA  
"Dpm1",1507.81188807743,0.289105130226967,0.287860396851234,1.00432408  
691626,0.315222427263514,0.46052801489465,0.224166795355431  
"Ifi47",1060.85803413464,-1.15855636961852,0.391811952616149,-2.956919  
41474162,0.00310729315780561,0.013889442741732,-4.95471257361768  
"Tgtp2",1486.4439717531,-1.00966840778767,0.498011856336081,-2.0273983  
3387882,0.0426216922025685,0.102897212847041,-2.29601092088035  
"Tgtp1",1869.84509917143,-1.15111886437126,0.54355108980737,-2.1177749  
1749525,0.0341941345502129,0.0869820268049644,-2.81109416259244  
"Ube2v1",4498.2502004013,-0.0781891284711207,0.213003399034102,-0.3670  
79252376638,0.71355990286802,0.810025092345171,-0.0164736716678572  
"Gm12169",0.0721532113593249,-0.544048378937457,4.78471990596623,-0.11  
3705376621746,0.90947135024012,NA,NA  
"Cdc20b",0.201840171091245,-0.0719637578156297,4.78471990595443,-0.015  
0403282177653,0.988000006750034,NA,NA  
"Pdf",1062.39939441351,0.216131639257615,0.17632208807434,1.2257774486  
3418,0.220282435821212,0.356112008427328,0.223158071761202  
"CN725425",0.0721532113593249,-0.544048378937457,4.78471990596623,-0.1  
13705376621746,0.90947135024012,NA,NA  
"Pate13",0.085368497520862,0,4.78471990596623,0,1,NA,NA  
"Cpt1b",1639.56923941734,-0.825246511356189,0.656696224372863,-1.25666  
401104147,0.208875325190283,0.342412232265019,-0.884449622039439  
"Ak6",2211.87442971111,-0.0442193819156353,0.209042431536281,-0.211533  
044227725,0.832471349970137,0.892796054409795,-0.00501434996968107  
"Naip6",246.342500612417,-1.20661764746676,0.43606117369043,-2.7670834  
2835257,0.00565602787123688,0.0217990178757416,-4.61638682778881  
"Naip2",237.753866836082,-0.734756824633758,0.252943688313926,-2.90482  
371602749,0.0036745999669727,0.0157674626223666,-3.04909885984814  
"R3hdm1",15.7577353342003,-0.394037431625454,0.804719489262416,-0.4896  
58119236826,0.624375842381376,0.741734001995496,-0.117724430901809  
"Arhgap8",212.229459048625,0.110323181887619,0.27197651427436,0.405634  
957790247,0.685010839237877,0.788496448636881,0.0262158082832066  
"Atp6ap1l",0.374314122502106,0.473713911122021,3.19641344237447,0.1482  
01701582797,0.882183588979311,NA,NA  
"Hsbp1l1",136.191863648714,1.83604859285406,0.363311916337697,5.053642  
64228387,4.33462308606088e-07,1.41316438901834e-05,20.5033272756649  
"Ces1b",0.482996217943864,3.4895843639457,2.81250118565488,1.240740584  
12643,0.214701596681553,NA,NA  
"Gm12033",11.7197818847267,0.807545381397586,0.863788511583957,0.93488  
7846466913,0.349846101077554,0.494834913225256,0.568133274869287  
"Gm3272",18.7951345012973,0.300747859207389,0.562795073195059,0.534382  
537323942,0.5930768982229,0.715848295255052,0.100536103402159  
"Wdr92",561.892703009252,-0.206267579958636,0.21509137800249,-0.958976  
514420061,0.337570576694394,0.482123579284156,-0.150483504948526  
"Gm15557",0.16957216673407,-0.541380993078895,4.78471990596009,-0.1131  
47896578967,0.909913302796856,NA,NA  
"Sec61g",411.195609598733,0.0222510946007964,0.244076426607066,0.09116  
4455781787,0.927361917486355,0.955440035252256,0.0010142777581336  
"Gm11027",14.1484324396913,0.522790884773944,0.576441249251634,0.90692  
8304406838,0.364444712196962,0.509423112654409,0.352610085243551



"Zfp429",302.55362153242,-0.522298569094132,0.208814706367612,-2.50125  
375831835,0.0123754469683013,0.0398376201069735,-1.68333882236185  
"Zfp456",159.645359474028,-0.789581089859648,0.221281819997568,-3.5682  
1491195402,0.000359421645497614,0.002660593486679,-4.68158898742273  
"Bpifa6",0.454886807022958,2.18688467142174,3.66298327952411,0.5970228  
37545099,0.550492133295395,NA,NA  
"Samd1",2140.25724757826,0.303795580779485,0.216613929224209,1.4024748  
1714363,0.160773505397269,0.282360098021614,0.384171409269596  
"Gm14124",2.14484503965941,-0.124645215755914,1.48668260153503,-0.0838  
411747249982,0.933182710551073,0.958398550978395,-0.00529637010518241  
"Gm14139",0.124557648045323,-0.545425050517131,4.78471990596623,-0.113  
993099123111,0.909243263887189,NA,NA  
"Serpina3m",15.0133585746691,-4.55118074216533,1.47018405882841,-3.095  
65371412895,0.00196379556090784,0.0098508067524006,-21.0273740184888  
"Serpina3j",14.6083368096087,-7.73329735835336,2.4152185581283,-3.2019  
0375000529,0.0013652260591842,0.00748360351475219,-37.8548064719588  
"Serpina3i",42.1827994156237,-0.745594770510917,0.578609571575539,-1.2  
8859736709969,0.197538099240347,0.328599277923746,-0.829784551535194  
"Serpina1c",142.234188638174,1.84866209660467,0.379436868523237,4.8721  
2037090555,1.10406864550225e-06,2.99403761474309e-05,19.2562238323667  
"Ifi27l2a",5829.10534294272,-2.83350417050946,0.590574176827828,-4.797  
88023534852,1.60353606397402e-06,3.97783030220934e-05,-28.709599630689  
9  
"Ly6c1",4349.12215695449,-0.641819201734908,0.28638137177448,-2.241134  
60228946,0.0250173574274779,0.0685288613544485,-1.72039655561324  
"Insl3",279.421920210907,-0.443126316277452,0.2504899381502,-1.7690383  
8752893,0.0768874686386592,0.161129821960079,-0.808946982899987  
"Slc45a4",1793.85976853539,0.423104654579139,0.10559164429018,4.006989  
92257749,6.14974859358073e-05,0.00067797439601287,3.08714123947021  
"Col22a1",32.2838186790674,-1.76709884997206,0.911582392859643,-1.9384  
9603043412,0.0525627346465859,0.120785880982809,-3.73518024197474  
"Gm21961",0.158549846488857,-0.0631865841068489,4.78471990596586,-0.01  
32059107635672,0.989463513944942,NA,NA  
"Gsdmc",4.78911368097315,-1.16826079548124,1.12045219967997,-1.0426690  
1864704,0.29710161146245,0.441396466038926,-0.955417454029594  
"Mef2b",12.921733832388,-1.71943489090336,0.752433511094737,-2.2851652  
2131199,0.0223031416468159,0.0626599269455372,-4.76289166313793  
"Alkbh1",1352.56584402533,0.133055705715885,0.262836354950166,0.506230  
219716419,0.612695042815632,0.732050244795588,0.0415008898378209  
"Prnp",5746.34425009753,-0.0430588002719923,0.294189983311281,-0.14636  
3923704472,0.883634105281025,0.927642157151211,-0.003234113207393  
"D130040H23Rik",338.143724964758,-0.177300464020444,0.294529664714001,  
-0.60197829034508,0.547188588491789,0.676940654407375,-0.0691776180635  
16  
"Apela",1836.48961742142,1.51467033878117,0.649235247865036,2.33300693  
972186,0.0196477810909489,0.0566620966885552,4.34808807558938  
"Fastkd5",499.208857740671,-0.00153382023125079,0.158745899616205,-0.0  
0966210928886386,0.99229087212316,0.995044158668305,-7.62026775151113e  
-06  
"Serpina1c",9.77475775929293,-1.82288856271989,0.626778536916541,-2.90

83455404961,0.00363346618024706,0.0156322426263145,-7.58033564207339  
"Vinac1",5.23332206743347,-0.750816789766817,0.997030899286726,-0.7530  
52679013208,0.451418258851316,0.591993086567323,-0.393623452162916  
"Slc8a3",9.32643259459855,-0.944422996522012,0.627688793331264,-1.5046  
0388421112,0.132425947072503,0.24347393833283,-1.33422921718939  
"Kcnp3",375.77762099286,-0.625059803849715,0.286234138542607,-2.18373  
603872787,0.0289816499660591,0.0765800529933893,-1.60604031170929  
"Cyp4v3",964.269760005052,-1.01724703840754,0.171316872206174,-5.93781  
000848135,2.88854501045013e-09,3.21189920567974e-07,-15.2090977297741  
"Hmgn2-  
ps1",0.911619984723531,1.0045479955646,3.54180544230297,0.283625967583  
193,0.7766970347267,NA,NA  
"Slc28a2b",2.66530422306004,1.02316834215328,0.940440488185515,1.08796  
713349441,0.276609617106464,0.420172508128844,0.887178954299568  
"Gm3086",1.99906464862633,0.561075225677856,1.36707045066571,0.4104215  
88298272,0.681496712566586,0.785750275064945,0.135284356199984  
"Jrkl",794.33416798736,-0.216313437248408,0.12579944047199,-1.71951032  
879651,0.0855214885458401,0.175010283760158,-0.377014970251991  
"Ccdc82",4102.91858906652,-0.11244869745591,0.105578619089474,-1.06507  
073520837,0.286843921239627,0.430851458002485,-0.0946808916686675  
"Prllc2",0.150059148640589,1.08555847741413,4.78471990596623,0.2268802  
56054385,0.820516855131543,NA,NA  
"Esd-  
ps",0.0949500915947116,2.04836625511614,4.7634299069052,0.430019186835  
683,0.667181684222319,NA,NA  
"Tgm7",51.1177099995232,1.23028869388175,0.405178537847109,3.036411307  
51596,0.00239412531908704,0.0114525651304119,5.49882642991358  
"Prps1l3",534.518088486533,-0.152269833135794,0.237513997148327,-0.641  
098356155834,0.521458782169264,0.654820849793026,-0.0644700716844581  
"C7",1321.29306955046,-1.16422471598495,0.322269287415084,-3.612583517  
72573,0.000303161417221208,0.00232443622217032,-7.06018204631106  
"Srp54c",1655.59279222703,-0.478175726891051,0.268053425835129,-1.7838  
8216976254,0.0744428137798625,0.157359711955742,-0.884252564958694  
"Pms2",345.862968589704,-0.383282993932271,0.16150262052012,-2.3732308  
0392075,0.0176332414201801,0.0521877567107881,-1.13179917273895  
"Capn3",59.8433856512988,-0.53548370010298,0.300314067496013,-1.783078  
97651211,0.0745734481788556,0.15755044886676,-0.989578997946054  
"Kdelr2",3665.89492327836,0.154594804160035,0.114380586468465,1.351582  
54502094,0.176508897285101,0.302928481583038,0.184626164444952  
"Fam90a1a",0.0820963129933334,-0.544048378937456,4.78471990596623,-0.1  
13705376621746,0.90947135024012,NA,NA  
"Rpl27-  
ps1",1.31563338818645,-2.76463510630353,1.57234723978531,-1.7582853433  
0688,0.0786989702583679,NA,NA  
"Gm8818",0.649875221549138,-0.565503102538558,1.87037814773564,-0.3023  
4693621885,0.76238760157947,NA,NA  
"Gm4204",1.307626134622,0.775108144852753,2.431917918238,0.31872298774  
555,0.749936581365068,NA,NA  
"A130010J15Rik",299.82591469181,-0.20744345982569,0.216130018562065,-0  
.95980864299107,0.337151531596487,0.481560366498301,-0.151583849154611

"Smok3b",0.519273059374675,0.414240873250076,4.42056307716769,0.093707  
7168720066,0.925341340077664,NA,NA  
"Fam155a",3.70269242339113,-1.5026840925287,1.06263545026688,-1.414110  
63610883,0.157329420714432,0.278039431259856,-1.92342412229483  
"Trim43b",0.992106275514212,-0.108223953311967,1.72481522887224,-0.062  
7452445342388,0.949969368421008,NA,NA  
"Tlr5",87.8803802739668,-2.14231413859829,0.545471590299036,-3.9274531  
9224387,8.58501220819935e-05,0.000878229632924821,-15.0767552467685  
"Sap25",1764.6705037564,0.0277059207314578,0.436628293441699,0.0634542  
496389032,0.949404789283751,0.968673135954443,0.000881825291622814  
"Cd209g",9.51764480706446,-3.37756188552629,1.59469307157697,-2.118001  
22903041,0.0341749635978911,0.0869559493973222,-8.24920048884291  
"Zan",75.804321483144,0.276852299560939,0.371780563694101,0.7446658771  
24045,0.456473732350209,0.596486516225821,0.143049207361142  
"Fam228a",56.2671395897207,1.11022727147658,0.376092043268234,2.952009  
46509989,0.00315713253169249,0.014044665777536,4.73568843228165  
"Mphosph8",3552.9809812086,0.513272237375754,0.236001787081839,2.17486  
589284922,0.0296401674753828,0.0779293399993275,1.30984650296161  
"Gzmc",5.36314309823131,-1.32903969699267,1.0546801033526,-1.260135364  
9964,0.207620534523172,0.340727647683933,-1.43093957341572  
"AC133103.1",10.232829748555,-2.5043543088909,0.952814502555766,-2.628  
37551503822,0.00857937500797314,0.030000117271424,-8.78165358990798  
"AC125149.1",0.109943896015533,-0.0667539898524695,4.78471990596623,-0  
.0139514937476761,0.988868679647546,NA,NA  
"Psme2",5745.50498902824,-0.515466949735016,0.17971793625203,-2.868199  
8051221,0.00412814741466647,0.0171986715608152,-2.09430259436598  
"Zfp664",2553.95249624231,-0.453121429974315,0.13338314163747,-3.39714  
168081212,0.000680937012764687,0.00437163075242599,-2.46163616663216  
"AC132444.1",26.671182827979,-1.60951164213128,0.431617933168693,-3.72  
901939063366,0.000192226361410079,0.00164243189955028,-10.319508260370  
3  
"Gm6565",35.2408428526514,-1.20595232241994,4.56708381163954,-0.264053  
030808519,0.791739055682682,0.865994259886126,-0.173508800783786  
"Gm9531",43.5177333001213,-1.3550072181349,0.64481571578542,-2.1013867  
7604101,0.0356070278307383,0.0896752555726861,-3.26768175652885  
"Ccr5",1092.25685280022,-1.14797164999116,0.501359624573733,-2.2897169  
8901201,0.0220377279209375,0.062115877505285,-3.189930408272  
"Cc dc13",19.1589218398124,1.02957282479179,0.716679484181784,1.4365875  
5066392,0.150835223082254,0.269197728115129,1.3511178083386  
"Xirp1",37.0347875014224,-0.594660373978896,0.332939473435344,-1.78609  
153142179,0.0740844391202404,0.156874282576721,-1.10149567982265  
"Trim71",40.1504411763302,-1.34557395884613,0.484417803344892,-2.77771  
367929703,0.0054742832837387,0.0212709397103103,-5.18101609691782  
"Tmpe",391.525136564015,0.710150049882418,0.199658086300906,3.5568308  
9545468,0.00037535560497786,0.00275138480671366,4.18679680058922  
"Gm15217",264.889823230595,2.31885673612736,0.858161663030449,2.702121  
09911637,0.00688986631447628,0.0254718645050547,8.51062344468793  
"Slco1a6",3616.15966667181,2.06408745117607,0.540889309122743,3.816099  
55375855,0.000135577821122466,0.00126166132895907,13.7784564463334  
"Gm6614",69.3373693932003,2.36375013249931,0.727316999160158,3.2499585

9471009,0.00115421812273355,0.0065554747908706,11.8836467901407  
"Gm8257",13.6380234129141,0.616832976446496,0.632680457686452,0.974951  
840147068,0.32958414961209,0.474359571349341,0.460027653021064  
"Gm6490",0.50095658390211,-0.515406704250955,3.04431130242158,-0.16930  
1576957974,0.865559435655045,NA,NA  
"Gm5930",0.499430441276193,1.37875655270858,3.55118757838797,0.3882522  
45840096,0.697829373026507,NA,NA  
"Hoxd3",1015.06099525657,0.665778839822013,0.311512991086862,2.1372426  
1546565,0.032578263546839,0.0837898671199403,1.65076081458949  
"Tmem233",0.290414005972113,-0.109851654929429,3.23811279389837,-0.033  
924591859933,0.972937283003593,NA,NA  
"2310009B15Rik",369.286836827335,0.0113386870433492,0.22492708306756,0  
.0504105014332285,0.959795268093943,0.975657584969277,0.00027942594554  
6979  
"Clec7a",819.649186556747,-1.48030897762129,0.447560258866827,-3.30750  
764460023,0.000941301426790713,0.005609258930185,-7.67293980097908  
"Klrb1-  
ps1",0.406631083276752,-0.180305767592832,2.73296921939517,-0.06597431  
33267835,0.947398275883931,NA,NA  
"Klrb1b",186.024283069849,-1.08006274910524,0.418426004703344,-2.58125  
149241378,0.00984428379718639,0.0333616666189413,-3.67258893244764  
"Klrb1",1.10511889021849,-0.75968597428953,1.75577240312428,-0.4326790  
7214951,0.665247935661971,NA,NA  
"Tex52",1.77359683339248,-1.42417721411019,1.68372239003755,-0.8458503  
74466083,0.397636219478939,0.542175594923102,-0.87183194863169  
"Gm3222",5.37820451139663,1.28568474996218,0.693923953043259,1.8527747  
0870361,0.0639146567122147,0.139897617487064,2.52874188607437  
"Rab9",1821.15934484295,0.18483176503438,0.174896042253143,1.056809305  
99251,0.290598626321347,0.434291736856911,0.154156857221464  
"Trappc2",592.808850354294,-0.35648963551668,0.268737154571431,-1.3265  
3646677621,0.184662064389681,0.312927249389015,-0.414164149183148  
"Gm20661",7.7043160767947,-1.38558233454369,0.762355070649969,-1.81750  
261510344,0.0691401882481734,0.14874714669126,-2.64023741484927  
"4932414N04Rik",2.69867123604748,0.805200476516878,1.05435203746807,0.  
76369224689933,0.445050662127652,0.58620535095352,0.430045595171745  
"Lemd1",0.9934216970203,-1.89647050001011,1.9911368435622,-0.952456133  
862337,0.34086570263779,NA,NA  
"Naa80",1939.27303604219,-0.143496418748675,0.15016283777015,-0.955605  
400640614,0.339271631967225,0.483915016832257,-0.104156297651294  
"Ifit1bl1",105.199661171351,-0.894410431118377,0.438239752853837,-2.04  
091578934576,0.0412591981146325,0.100183293255181,-2.05781823233358  
"C1s2",30.3361687133456,-0.364652857019421,0.375799963015456,-0.970337  
660742193,0.331878210902189,0.476717353482457,-0.270146328176517  
"Magea8",0.139896150021884,0,4.78471990596454,0,1,NA,NA  
"Ackr4",19.6740011682984,-0.839354835864921,0.516856344363577,-1.62396  
156111511,0.104384012546314,0.203874534371234,-1.33478444903741  
"Mettl4-  
ps1",0.342279092424296,-2.40314989186315,4.74010433057101,-0.506982489  
048645,0.612167105241947,NA,NA  
"Gm11100",6.2303773115038,1.23885710072941,0.905781079475416,1.3677224

3183407,0.17139897567401,0.296323570463898,1.50682595289453  
"Gm9006",0.0983898136351889,-0.544048378937457,4.78471990596623,-0.113  
705376621746,0.90947135024012,NA,NA  
"Gm43302",148.598951264435,-1.50368331492506,1.68967762546475,-0.88992  
3197338585,0.373507127041764,0.518669750235761,-0.98714992836298  
"Gbp4",1456.2957800641,-1.06372316725954,0.431672157300633,-2.46419220  
99199,0.013732244870009,0.0432760757878048,-3.34025596149862  
"Gm3558",12.0246678004671,-1.65468867343266,1.04088431655878,-1.589695  
07668551,0.111903553982688,0.214626745578837,-2.54632565169921  
"Gm8334",0.198428573791398,-0.0677848707312059,4.78471990596443,-0.014  
1669464594381,0.988696790244393,NA,NA  
"Gm8271",0.157502682527355,-1.19648096621745,4.77621924155054,-0.25050  
7965758505,0.802194545266423,NA,NA  
"Gm3298",2.42717991289243,-1.30499520468285,2.73722974498275,-0.476757  
644138152,0.633534709955508,0.748646046952273,-0.377781723722988  
"Gm3173",0.421950588436764,-0.402444550463111,4.76321664047863,-0.0844  
900790451286,0.932666790412763,NA,NA  
"2610042L04Rik",1.74328528077323,-1.77747504038472,1.46395489519151,-1  
.21415970274972,0.224686745251071,0.360891997574805,-1.81156086355852  
"Gm2974",3.65105879445765,-3.10167626495399,1.38608049040008,-2.237731  
70925933,0.0252385561280075,0.0689893968013305,-8.29326961414194  
"Gm3411",82.0593113263913,0.778035426882434,0.416584556663539,1.867653  
07171678,0.0618104437811865,0.136579786133905,1.54894896746341  
"Gm5795",0.0765959922879536,-0.544048378937456,4.78471990596623,-0.113  
705376621746,0.90947135024012,NA,NA  
"Gm2897",62.9281276776873,-1.77978490484802,0.608941584705068,-2.92275  
145851638,0.00346953341905721,0.0151204654905627,-7.46033528201389  
"Cntf",149.930845358447,-1.40355814803049,0.468360764403973,-2.9967457  
8808204,0.00272878161755693,0.0126087597024852,-6.13826996362396  
"Atg4a",1114.59584271165,0.0583272126689736,0.135680471333191,0.429886  
571706692,0.667278154028856,0.774716532526774,0.0148884923770411  
"Ms4a6c",1185.12726466477,-0.952952953752881,0.43803497674202,-2.17551  
794799738,0.0295913246298665,0.077844314884852,-2.43293121147264  
"Gm3259",0.222908359211618,2.7145462834081,4.71096270880419,0.57621901  
322525,0.56446715533442,NA,NA  
"Arpc4",5985.39920419908,-0.0231205891601203,0.155686979865081,-0.1485  
06889787166,0.881942748983587,0.926371289515079,-0.00176826645304868  
"Mthfsl",789.081054423209,0.615256626542925,0.148360558387854,4.147036  
33653414,3.3680662608435e-05,0.000425879091789407,4.77522514027449  
"Tceal7",0.29481514664608,1.40063163448135,4.78471990595329,0.29273012  
0469254,0.769728445076231,NA,NA  
"Mroh2a",21.0042664821747,-0.8959608813583,0.755608793455713,-1.185747  
02824817,0.235722216388183,0.373576507773453,-0.882192162461498  
"Neu2",258.578569943283,1.92472963672029,0.569021027425162,3.382528138  
59929,0.000718219196473354,0.00456002536399787,10.3751147808449  
"Rpl36a",6923.64090032285,0.0776600841373221,0.190609397054255,0.40743  
0511493707,0.683691821202293,0.787350016526036,0.0185671578728481  
"Kcnj13",23.0701246529804,1.07446350159383,0.804774443474709,1.3351113  
5984227,0.181839902022001,0.309949681757582,1.2585677850652  
"St6galnac4",521.513615166713,-1.25055235999866,0.192664357864455,-6.4

9083397604067,8.53625084427705e-11,2.10119810007091e-08,-22.1074810132189  
"Gm21981",142.40865923477,-0.0743881521197627,0.340594138000871,-0.218407024138426,0.827111993171417,0.88967030836677,-0.00869629670584133  
"B3gnt7",321.227102029338,0.257342772440774,0.40885520614912,0.629422760357156,0.529072321135933,0.661569429712591,0.106318681259697  
"Clnd34c1",177.014362498018,-0.528878098435935,0.207877408328477,-2.54418266366026,0.0109533788071842,0.0363831311724833,-1.75251693261034  
"Tmprss11g",29.6498613888499,-0.880153138613053,0.57516381411231,-1.53026514710675,0.12595111548164,0.234869431232412,-1.27510032311996  
"Gm16026",4.06328255786046,-3.11441277028492,1.67201788176292,-1.86266714265112,0.0625091114139253,0.137669438419858,-6.17556858729123  
"Gm7609",86.9090956535087,0.13699575099407,0.498026355838671,0.275077311447445,0.783256842267547,0.859906639106567,0.0206769679997712  
"Gm15737",3.91722970918956,-1.82397815255565,0.985302715410569,-1.85118555346273,0.0641428633578663,0.140305906795297,-3.5821657625896  
"Col4a3",8915.77762806718,0.919036398464854,0.538248633471283,1.70745700279402,0.0877371430986891,0.178513573309986,1.58358301573941  
"Pigb",607.152714429335,0.047781893524522,0.149492632310908,0.319627079849308,0.749251043657038,0.836658659253474,0.00852138018292285  
"Utp14b",194.472964168589,-1.00282296812898,0.291087691738258,-3.44508887387345,0.000570871659462073,0.00382095416002512,-5.58297129117643  
"Mymx",75.0559859234659,1.30559766951542,0.617057017571687,2.11584607635345,0.0343579008653387,0.087227910295882,3.18465421380414  
"1700011M02Rik",0.424027718305264,1.36304810015425,4.78471990595354,0.284875212540286,0.775739746999088,NA,NA  
"Rab7",13318.0024058099,0.0944962345939376,0.146573523859408,0.644701935968855,0.519120361497513,0.652472687969994,0.0403485690522107  
"Znrd2",735.273660325042,0.529811471331403,0.152994888536973,3.46293576470281,0.000534315937090982,0.00364651457521875,2.9743528467767  
"Gm9112",0.121821870984685,0,4.78471990596557,0,1,NA,NA  
"Pin4",1663.73422501478,0.468998457973259,0.142729283908729,3.28593015483193,0.0010164621077453,0.00594807268211819,2.40347078407177  
"Nhsl2",771.259603733433,0.102072316216156,0.184195542229843,0.554151935386084,0.579474869340188,0.704094692851311,0.0358112989444249  
"Phyhd1",3201.33504327532,0.707387306970358,0.171645429342571,4.12121260484339,3.76883417593094e-05,0.000465682691776308,5.42707971624522  
"Med12",2057.26795373502,-0.0997648186484638,0.193674212951374,-0.515116685531657,0.606471483677249,0.726956619753937,-0.0318138507221884  
"H2-T10",392.608868724005,-1.1319996248218,0.228069776467883,-4.96339165299793,6.92726924540434e-07,2.04192587652012e-05,-12.2245002237612  
"Gm11127",449.495759550931,1.57711991485281,0.508859766197239,3.0993213054331,0.0019396454388847,0.00975727728776414,7.301658125716  
"Nat8f5",575.059199368998,1.93789195214865,0.990989713705698,1.95551167216673,0.0505227070427691,0.117355835041552,4.15202000434877  
"Nat8f6",3428.32698370618,2.77315206518742,0.812082077392556,3.41486672639235,0.000638132265253452,0.00416269752690258,15.201288094591  
"Gm13420",89.2689632021848,0.356379095393962,0.594630878434826,0.599328269551045,0.54895399991772,0.678725750817737,0.138110489842109

"Gm5138",2.92604826580552,-0.548768890301778,2.29008228239806,-0.23962  
8459867885,0.810618299696726,0.879302747617215,-0.070585957065298  
"Cfap77",13.0980307847207,-0.511763584984264,0.633745110941133,-0.8075  
22734533253,0.419365381796066,0.562326264648903,-0.294608506639985  
"H2-  
Q1",2.38512332331096,0.154386155150381,1.0994513648814,0.1404210864452  
7,0.888327298338072,0.93070824938275,0.0110863809053797  
"Apoo",2319.17078781833,0.88366296321208,0.39396918097743,2.2429748464  
5812,0.0248984365871817,0.0682222760788179,2.37262104021872  
"Zfx",1669.31195791535,-0.0829900259244042,0.0982843696662422,-0.84438  
6815586496,0.398453287410837,0.542834139039722,-0.0507028773939063  
"Gm42688",434.752702432108,-0.0070942237964934,0.15861268240559,-0.044  
7267121953885,0.964325141746371,0.978482952401665,-0.00015431294927275  
1  
"Tmsb10",21270.874191604,-1.03937912938968,0.317640805239366,-3.272183  
90158162,0.00106720134418657,0.00619294399075883,-5.28456176887006  
"Cldn34d",0.217386277664725,0.4.78471990595627,0,1,NA,NA  
"Gm5936",3.41743842044638,-2.31830706941885,1.20570960767318,-1.922773  
98692443,0.0545084403503747,0.124116030591102,-4.83723677045728  
"Ctag2l2",0.140115633876375,0.4.78471990596052,0,1,NA,NA  
"Gm5640",2.14743291875697,1.28748109434623,1.81803954433642,0.70817001  
6629727,0.478839683418252,0.61630577247931,0.623156369876553  
"Igkv13-85",39.2944916548824,-3.08422324352749,1.88745901219471,-1.634  
06104376339,0.102246033604119,0.20070403334472,-4.95302790297655  
"H2-  
DMb1",2745.89976968089,-1.09013610896519,0.383418307693402,-2.84320306  
853191,0.00446626040321262,0.0182005067568159,-4.36741866138379  
"Mpp4",92.4560962050247,0.926944345798124,0.305631313230554,3.03288408  
507697,0.00242228624970455,0.0115589175958736,4.13444806144858  
"Kifc1",201.40575036794,-0.475249756731426,0.339585058891014,-1.399501  
3746584,0.161662686407737,0.283564147137284,-0.598965306235205  
"Aox2",7.8492483683821,-0.474000073787922,0.583451299885874,-0.8124072  
63263683,0.416557979899276,0.55987092383512,-0.274943275897407  
"Haus3",637.083318892813,-0.455140574823212,0.218810088646008,-2.08007  
125100863,0.0375189980582469,0.0933212685469701,-1.07946019579988  
"March2",3296.06599479315,0.0884779397721951,0.243269150534696,0.36370  
3903999847,0.716079127768589,0.81179782738717,0.0184480000074883  
"Colca2",89.1870933747966,-1.12981433044418,0.275889762539973,-4.09516  
583740755,4.21866303912022e-05,0.000508063569714429,-8.56953321275622  
"Hoxa3",918.016849278264,-0.0811933409231836,0.176666898375615,-0.4595  
84345849311,0.645814597494392,0.758377079134284,-0.022456011822891  
"Maea",3475.11657245907,-0.34811869439226,0.0992315912090565,-3.508143  
82950748,0.000451245015753675,0.00319012883145945,-2.00087972302677  
"Pglyrp2",147.195554481467,-1.58619687001137,0.520367370049481,-3.0482  
2508348389,0.00230197434651008,0.0111374431285989,-7.13382936327439  
"Rbpj-  
ps3",0.799529097645108,1.29107828796847,1.91998923521984,0.67244037845  
9018,0.501303384355164,NA,NA  
"Tmem217",3.18758004780315,0.932213180800198,1.08049369387013,0.862765  
961605181,0.388266157449927,0.532527682748922,0.587406538984224

"Tmem182",413.92477248483,-2.94881028760891,0.726232511111332,-4.06042  
175541884,4.89841512269002e-05,0.00056986454691056,-22.0279427093603  
"C1qtnf5",1924.6317749343,-1.38634074037698,0.414382734531846,-3.34555  
623303953,0.000821177059656731,0.0050556710796296,-7.32992270381896  
"Cstdc4",17.3291642604628,0.579102732854923,0.554645027123782,1.044096  
14173947,0.296440910772115,0.440851565726084,0.474312382587383  
"Clec2l",17.7219652580693,-0.837363213425484,0.571925622143837,-1.4641  
1208206876,0.143163326614559,0.25869380924309,-1.1322072752657  
"9230102004Rik",75.5528083262293,0.242397925715847,0.351124143156691,0  
.69034821569554,0.489975233581677,0.626431878077023,0.113373205134387  
"Zbtb9",187.913722308313,-2.45149773253692,0.582219377858913,-4.210608  
27887969,2.54684019348005e-05,0.000346061422803521,-19.5357262487059  
"Stard6",86.9923703256813,-0.548815769844432,0.359360873044795,-1.5271  
9956737199,0.126711393868241,0.235746064660588,-0.793038815117351  
"Ankrd39",386.385544686138,-0.134221750368944,0.153727815754237,-0.873  
112973799893,0.38260150303918,0.527429638902544,-0.0858669968769398  
"Sehl1",2469.40350839351,-0.255438758677562,0.208806969290593,-1.22332  
4870551,0.221207017161953,0.357103363191237,-0.263032954597752  
"Muc4",558.583321447739,-1.68097872107742,0.718338340570896,-2.3400932  
7657699,0.0192789242527117,0.0558793615399691,-4.84888426579714  
"Tm4sf19",2.09897323447514,-0.921106775805099,1.24698315229173,-0.7386  
68180169292,0.460108512170276,0.599618143593097,-0.47111134746698  
"Rpl39",6751.36797575282,-0.0362495018912435,0.183192262994762,-0.1978  
76816949851,0.843141442919964,0.899603374493452,-0.00383524470718074  
"Gm1110",0.666661730750809,-2.48497892667704,3.66639075689195,-0.67777  
2526566043,0.497915933018789,NA,NA  
"Fam71f2",11.7927319364714,-0.511889990869717,0.532395345110349,-0.961  
484722905715,0.336308503256655,0.480746304966324,-0.37491620482536  
"Prtr4",19.347615932906,-0.983479605798743,0.518810017986511,-1.895644  
97928471,0.0580070053323864,0.130273149282924,-2.00445130755882  
"Rab26",20.6207919999352,-0.116997903106643,0.51233729125861,-0.228361  
091614521,0.819365534715853,0.884263529965667,-0.0143907596259298  
"Eloc",3224.20823943235,0.333418406381986,0.176881561009106,1.88498113  
924278,0.0594323842592799,0.13263278336814,0.673562194350184  
"Tmem243",1305.84481304629,0.85397323977852,0.208507418065215,4.095649  
19897202,4.20986998090384e-05,0.000507452964257932,6.47833197295681  
"1700015F17Rik",0.257788887631576,-1.61181276663539,4.76439227353112,-  
0.338303958637058,0.735134140852758,NA,NA  
"Fdx2",1136.46317330851,0.470080447539145,0.174211937088317,2.69832512  
855211,0.00696893408959614,0.0256695146896677,1.7216466944936  
"Vwde",0.326186543737132,-0.0635344406776446,4.78471990595404,-0.01327  
86123172191,0.989405511583547,NA,NA  
"Zglp1",21.2680205485744,-0.321988528333904,0.591318656663923,-0.54452  
6246052316,0.586079392425087,0.709686746584546,-0.110420043875249  
"Ulbp1",151.217964655972,-1.52814458086726,0.499337332513795,-3.060345  
14418175,0.00221082055353373,0.0108063622844825,-6.91885830019128  
"Gm14862",0.0848672154183096,0,4.78471990596508,0,1,NA,NA  
"Vmn2r93",4.04454899015847,1.41388796320748,1.01239085923646,1.3965830  
9862045,0.162538975684724,0.284665853579516,1.77646430400199  
"Ssxb3",1.26357472353921,-0.711296827777138,1.98412426492945,-0.358494



092507068,0.719973588015884,NA,NA  
"Tcte3",14.2754513913938,0.312312735869354,0.779539130676743,0.4006376  
63433555,0.688686911899414,0.791279752988495,0.0731135681851929  
"Gm3448",90.8760052959319,0.308155161511508,0.204164662121993,1.509346  
22235154,0.131210328299437,0.241717590814666,0.437575773081725  
"Smok4a",0.167236268235182,0,4.78471990595382,0,1,NA,NA  
"Ttll2",1.26284004591748,-4.00547408918641,1.75883732107023,-2.2773419  
9246416,0.0227658111593077,NA,NA  
"3110001I22Rik",84.7348536987991,-0.563125203590962,0.328181436751329,  
-1.71589596646703,0.0861810851093227,0.175972227192541,-0.978390113656  
567  
"Fam205a2",4.10546476111458,-3.60201570617797,4.72405885458137,-0.7624  
83241013127,NA,NA,NA  
"AC125149.2",0.0859362365967029,-0.544048378937457,4.78471990596623,-0  
.113705376621746,0.90947135024012,NA,NA  
"AC125149.3",51.9417045274868,-1.43375090462747,0.602243605754028,-2.3  
806826522174,0.0172805917470969,0.0514253065148257,-4.25483486064851  
"AC168977.1",24.4194131367029,-1.11146108893281,0.636976475030192,-1.7  
4490131504484,0.0810020484281633,0.16787605657444,-1.98343491273453  
"Tmlhe",724.499079264515,-0.134099595219557,0.349997819097427,-0.38314  
408805567,0.701612931686685,0.801536344671323,-0.029666177876089  
"Xlr4a",123.543347812685,-0.824268098378649,0.609785944729068,-1.35173  
351485639,0.176460579535251,0.3028988801636,-0.984469761572941  
"Klra4",12.9032236445617,-1.21516108581117,0.703653658747668,-1.726930  
67207788,0.0841801151120146,0.172900440793644,-2.13265550624728  
"Klra1",14.6509693703088,-1.76724619694842,0.795211985448906,-2.222358  
60284574,0.0262590806347097,0.0711802522195982,-4.67001850991866  
"Gm4984",0.119399719318782,0,4.78471990596094,0,1,NA,NA  
"Gm10698",0.27236914177153,-1.80039963343949,4.75433019234732,-0.37868  
6283997997,0.704920839903829,NA,NA  
"Gm11951",0.592165312938737,0.204431273021883,2.62553184418785,0.07786  
2804625445,0.937937187158899,NA,NA  
"Gm16073",2.64051327902683,1.14240045797058,0.936285758198459,1.220140  
80420139,0.22241150253415,0.358306161812019,1.17252265345397  
"Gm11273",1.19991339185247,-2.21236288709139,1.83219552811087,-1.20749  
27883775,0.227242420699563,NA,NA  
"Rpl28-  
ps3",0.696014434970465,-1.05155809308772,2.43769449415278,-0.431374028  
045787,0.66619643134195,NA,NA  
"Gm14853",4.81044820855453,-0.0491678508608743,0.724699411771865,-0.06  
78458545187178,0.945908341203087,0.966678962865873,-0.0016662410155246  
4  
"Gm11799",0.217996825385802,1.35259535955677,4.78471990596398,0.282690  
60386812,0.777414019612185,NA,NA  
"Gm12947",0.109774352016009,0.783563706501105,4.78471990596623,0.16376  
3756688046,0.869917124392331,NA,NA  
"Gm5566",0.139660715524877,0.878580643585134,4.78471990596623,0.183622  
16824638,0.85430987107372,NA,NA  
"Rps19-  
ps7",0.353285840664904,2.51828711802403,4.6862178868173,0.537381568430

306,0.591004072282452,NA,NA  
"Gm5915",1.1467283258217,-1.60406915271899,1.8561709723417,-0.86418178  
9620024,0.387488034248986,NA,NA  
"Gm14864",0.563078828412384,1.68458566797839,4.32059989785045,0.389896  
243069508,0.69661327209948,NA,NA  
"Rpl12-  
ps1",0.238328672238717,-0.0842666279073726,4.06655152086738,-0.0207218  
886751984,0.98346750813001,NA,NA  
"Gm12378",0.307470783928605,-2.24482137699618,4.74340034090464,-0.4732  
51510659557,0.636033751893678,NA,NA  
"Rps19-  
ps3",113.667617382987,0.503740147755365,0.240396876182973,2.0954521362  
9129,0.0361308190354772,0.0906542310099544,1.20933031706764  
"H2ac14",0.227784851836398,-0.535158236868322,4.78471990596092,-0.1118  
47348932925,0.910944444009316,NA,NA  
"Eef1akmt3",172.006805720096,1.15287786046,0.365442780867248,3.1547424  
6809323,0.00160639834291567,0.00848822625749856,5.49816123815564  
"H3f4",0.487525728937086,-0.0810972722206582,4.53533183983377,-0.01788  
12212831665,0.985733609865265,NA,NA  
"Gm14448",0.542068407696648,2.57248017991015,1.99366469653547,1.290327  
39777182,0.196937008125148,NA,NA  
"Gm14756",3.12684918925749,-2.00294387817254,1.56241993588485,-1.28194  
977046181,0.199860267063517,0.331361807179863,-2.21234049927777  
"Gm13573",25.3675705872204,0.653871573054121,0.625528496265054,1.04531  
060848275,0.295879436222748,0.440218027277462,0.536491921097668  
"Gm11486",0.274637497105995,-0.0727624895253796,4.7847199059629,-0.015  
2072620666259,0.987866828041307,NA,NA  
"Gm14239",9.23734383150301,1.54579971246491,0.916479400652577,1.686671  
52951198,0.0916665294562879,0.184749892799198,2.61047281883991  
"Atp6v0c-  
ps2",0.637439406786506,0.663726794188368,2.08753695875243,0.3179473261  
08673,0.750524892752918,NA,NA  
"Fam220-  
ps",0.195731310228964,-1.59253370050427,4.76137237505847,-0.3344694712  
06757,0.738025324148497,NA,NA  
"Brms1",1531.45154453829,0.178678849463677,0.122210658081583,1.4620561  
9271273,0.143725811949011,0.25940626505432,0.241102066456239  
"Gm14806",0.924920890121944,-0.745636293903287,1.51598379277179,-0.491  
849779304027,0.622825543011276,NA,NA  
"Gm12419",0.146566312185547,-0.543527903010563,4.78471990596623,-0.113  
596597855774,0.909557584411867,NA,NA  
"Spaca6",1457.10417239223,-0.170801465470426,0.172160881973638,-0.9921  
03801469721,0.3211468923274,0.46642250328489,-0.130264025734044  
"Gm15981",0.44165739466225,-1.93359648029745,3.79755104074287,-0.50916  
9319793844,0.610633546078344,NA,NA  
"Gm13183",0.747504546461109,-1.66364441650412,2.57858937236341,-0.6451  
7617048088,0.518813026791546,NA,NA  
"Ccnd3-  
ps",0.13723801640762,-0.539570848828682,4.78471990596623,-0.1127695788  
7459,0.910213237001764,NA,NA

"Gm14324",47.2018522187854,0.851169156115109,0.421006205127261,2.02174  
966959886,0.0432022197232307,0.104084626240399,1.92581362267868  
"H2bu1-  
ps",3.98857764889784,-0.143901575746456,1.02760575457795,-0.1400357823  
07932,0.888631718732928,0.930883858155839,-0.0103063400836  
"Gm5406",0.0979111614626272,0.872226304507305,4.78471990596623,0.18229  
4119958766,0.855351912966398,NA,NA  
"B230307C23Rik",181.75759420915,0.288194254393208,0.167992336581395,1.  
71552024489863,0.0862498869064985,0.176094271717582,0.500517276822345  
"Gm8019",0.284872694796323,-0.299837486489242,3.98193070077294,-0.0752  
995240301496,0.939976400177968,NA,NA  
"Gm12564",0.0912955812833968,1.38290321109373,4.78471990596623,0.28902  
4903917436,0.772562319885583,NA,NA  
"Gm14016",1.24297293696577,-1.29097502493633,1.67985829143526,-0.76850  
2338273621,0.442188802025095,NA,NA  
"Gm7571",0.0949500915947116,2.04836625511614,4.7634299069052,0.4300191  
86835683,0.667181684222319,NA,NA  
"Gm12219",0.692893423873329,0.205006783112654,2.53458650634739,0.08088  
37191389024,0.935534427783341,NA,NA  
"Gm12543",51.5686386640851,0.324855175278283,0.620294740224439,0.52371  
0994487462,0.600479567443969,0.722231598322123,0.105710933595248  
"Gm12955",4.23496572896396,-0.271480578200501,0.864694141819201,-0.313  
96139405934,0.753550360319305,0.839812582812826,-0.047394136690495  
"Gm9143",0.859402415010214,0,3.27711976921284,0,1,NA,NA  
"Gm12174",1.11150703583195,-0.48534423792283,1.75482949964789,-0.27657  
6293035999,0.78210547025574,NA,NA  
"Gm13495",0.0879989745112968,1.38047202050314,4.78471990596623,0.28851  
6788366605,0.772951181378425,NA,NA  
"Gm8250",0.470599017223304,-0.0591017532494964,3.07287618081475,-0.019  
2333663225656,0.984654940044975,NA,NA  
"Gm7638",0.089804525095522,0,4.78471990596623,0,1,NA,NA  
"Cbx3-  
ps3",1.37772037592315,-0.00449394766271793,1.88443294344379,-0.0023847  
74517105,0.998097227035365,0.998763137425484,-5.5618359987416e-06  
"Gm9159",0.299895288408894,-0.0674476618351444,4.78471990595283,-0.014  
0964702554962,0.988753016504793,NA,NA  
"Gm15760",59.85939741496,-0.580383207491776,0.355612488224766,-1.63206  
643948044,0.102665490717009,0.201263999396767,-0.930434260088464  
"Gm11582",0.0936055384591785,-0.0734269209554436,4.78471990596623,-0.0  
153461273383809,0.987756042513205,NA,NA  
"Gm13005",1.00618222634576,-2.23786473190914,1.89200138549949,-1.18280  
290334901,0.236887269668759,NA,NA  
"Gm12608",0.452024059809244,-0.0994916998326573,3.77613549968069,-0.02  
63474919904411,0.978980174912982,NA,NA  
"Gm11737",3.28209773500376,1.5050587148948,1.0792238197088,1.394575145  
03424,0.163143994544071,0.285467826054092,1.88678066061427  
"Gm14828",0.0721532113593249,-0.544048378937457,4.78471990596623,-0.11  
3705376621746,0.90947135024012,NA,NA  
"Gm12314",0.471246541220926,-1.47389226337292,3.05182934660769,-0.4829  
53696284246,0.629128614017458,NA,NA

"Gm12447",0.473446109965616,1.52497756145745,4.6608853811002,0.3271862  
39687679,0.743527027792688,NA,NA  
"Gm13751",0.36370881504367,-0.544821647565322,4.78471990594941,-0.1138  
669887213,0.909343234507647,NA,NA  
"Gm9001",0.187864797281494,-0.539645107411675,4.78471990596623,-0.1127  
85098818172,0.91020093237732,NA,NA  
"Gm6444",0.485851262662352,-0.135633361652346,2.14621519972712,-0.0631  
965339121593,0.949610004801933,NA,NA  
"Gm9385",8.9513375646195,1.04081556589178,0.944741873450416,1.10169306  
044463,0.270595134920534,0.413031465530027,0.920321910299988  
"Gm12439",3.45913175134234,-0.58614722190759,1.10629862657889,-0.52982  
7306863957,0.59623167054073,0.718810679045518,-0.193520765087404  
"Gm12094",0.602713619824272,-1.25479849804068,3.12945152468406,-0.4009  
6435050783,0.688446370870511,NA,NA  
"Rpl10-  
ps1",1.19827662636793,-1.71009091399967,4.75769078418113,-0.3594371705  
88211,0.719268071957494,NA,NA  
"Gm13815",0.174037060030708,-1.1214791660092,4.77934701932327,-0.23465  
1127334962,0.814479523357795,NA,NA  
"Gm14523",0.433707108918781,-0.0494995367919116,3.79101774895254,-0.01  
30570575159107,0.989582271413497,NA,NA  
"Gm5687",0.651224578118442,0.586491293691973,2.07898424986741,0.282104  
731543482,0.777863205273842,NA,NA  
"Gm14111",0.0970646269723127,-0.0721772193211291,4.78471990596623,-0.0  
15084941384161,0.987964414631213,NA,NA  
"Gm15010",0.139896150021884,0,4.78471990596454,0,1,NA,NA  
"Gm7332",8.08475565843892,0.429683497707126,4.56848890039793,0.0940537  
466709614,0.925066462248324,0.953982434067691,0.0202423984414905  
"Rpl10-  
ps6",51.0772996792698,0.573451777013851,0.663149854720301,0.8647393540  
57036,0.387181864194045,0.531489157142741,0.362463087942667  
"Gm14387",77.8491177181661,-0.393702328535258,0.311463694243337,-1.264  
03923093415,0.206215946302816,0.339250486306313,-0.425598731657715  
"Gm15920",18.2542080637709,0.636455852407183,0.601364804960914,1.05835  
234645724,0.289894836238555,0.433630189258101,0.531799092901547  
"Gm14567",6.78786507472678,1.42040239120832,1.89005238663947,0.7515148  
26387332,0.452342881314086,0.592846776894673,0.742613783494336  
"Ywhaq-  
ps3",2.94342455123549,-1.9861477238844,1.47875340813845,-1.34312300682  
011,0.179232146994165,0.306549859832652,-2.3483711409691  
"Gm11966",0.113878607504189,-0.0631812258841595,4.78471990596623,-0.01  
32047909022588,0.989464407387087,NA,NA  
"4930455H04Rik",0.737681301947111,-2.91380219539212,2.93865317661777,-  
0.991543411307133,0.321420305710602,NA,NA  
"Gm7129",0.752813143873197,-0.468776478491508,2.16693158499876,-0.2163  
31923784191,0.828729026591457,NA,NA  
"Gm12463",7.03103589759251,-1.31413892456095,0.70262322098084,-1.87033  
232793879,0.0614376829379969,0.13600271820221,-2.62181282002718  
"Gm15925",1.06743952287879,-0.447705991594434,1.68208180775355,-0.2661  
6184155297,0.790114569356098,NA,NA

"Rpl38-

ps2",8.24937849479042,0.804268920009236,1.09362955769152,0.73541256667  
1044,0.462088270786413,0.6013747900009,0.409000445996729

"Hmgb1-

ps6",10.1536336358542,1.54760927208356,0.812079085749679,1.90573713723  
321,0.0566843184736468,0.128053625489418,3.18081086037635

"Gm10224",0.658512346459009,2.02577324822442,1.98515048182896,1.020463  
31840699,0.307508777470391,NA,NA

"Gm12931",0.241229565195936,2.17926938741541,4.7204199272315,0.4616685  
42420025,0.644319033203918,NA,NA

"Got2-ps1",0.42398008820833,0,4.47831619413821,0,1,NA,NA

"Gm13510",0.300325157400826,-0.00335992969313243,4.7833443737121,-0.00  
070242270483339,0.999439547814744,NA,NA

"Zfp36l1-

ps",1.20847356470993,-2.27587139006355,2.14271342522079,-1.06214455151  
838,0.28817006746846,NA,NA

"Gm13130",0.0978453789602802,-0.0553726826677976,4.78471990596623,-0.0  
115728159131638,0.990766434966999,NA,NA

"Gm12985",0.148520197626442,1.3794606047162,4.78471990596463,0.2883054  
03832848,0.773112971034974,NA,NA

"Gm7278",3.27893235652843,0.494526850221874,0.871493254713116,0.567447  
708341318,0.570410044332749,0.69713438612052,0.178413953163247

"Gm12208",6.8878363334022,0.814134620895008,0.700962759106838,1.161452  
03196297,0.245458119588408,0.384652134925474,0.777837160555114

"Gm5379",0.591304377819821,1.14577753090139,3.49240383774445,0.3280770  
44962069,0.742853409763738,NA,NA

"Gm16179",0.147414268477378,0.39665976277778,4.78471990596623,0.082901  
3548490417,0.933929976737676,NA,NA

"Gm15739",4.30802645563414,0.200435866155382,0.973440455826642,0.20590  
459843296,0.836865433386647,0.896008029222604,0.0220090416498733

"Gm11453",0.379396284176735,2.58219519500059,3.5813749172744,0.7210066  
67731333,0.470905412367546,NA,NA

"Atf1-

ps",0.147584720452783,-1.19613598147574,4.77623172629649,-0.2504350814  
66039,0.802250902680516,NA,NA

"Gm16128",1.98899317588291,0.286261094791186,1.23625504627732,0.231555  
046552239,0.816883626194476,0.882761056939136,0.035696964253705

"Gm9009",0.343226921701456,-1.36832524139309,3.81031728737383,-0.35911  
0577464842,0.719512369009311,NA,NA

"Gm13772",0.140585840359221,-0.079888022165446,4.78471990596623,-0.016  
696488767468,0.986678748329326,NA,NA

"Gm12161",0.487803512401126,-2.92040002338364,4.73156614843928,-0.6172  
16357494429,0.537092027865602,NA,NA

"Gm14469",0.0983898136351889,-0.544048378937457,4.78471990596623,-0.11  
3705376621746,0.90947135024012,NA,NA

"Gm13559",0.311353711989764,3.44738297338498,4.68731279342057,0.735471  
073793914,0.462052650339762,NA,NA

"Gm14048",0.131541805299557,-0.546563197984049,4.78471990596623,-0.114  
230970406966,0.9090547017543,NA,NA

"Olfr118",16.1555669667941,-0.521751139016599,0.488467011160116,-1.068

13997075756,0.285457378050013,0.429654308441239,-0.440761967574795  
"Gm12903",0.0783944374996835,0,4.78471990596623,0,1,NA,NA  
"Gm13464",3.93525764257055,-0.363310745062261,1.03819462039974,-0.3499  
4473861016,0.726380170656004,0.819995401079826,-0.0721013960180142  
"Gm4986",0.127031414256792,-0.0440738077365257,4.78471990596623,-0.009  
2113663083117,0.992650496972172,NA,NA  
"Gm9157",3.15203497270453,1.19672943724781,0.937479944597199,1.2765387  
0799551,0.201765152702872,0.333598861334694,1.31378874993285  
"Cyp4b1-ps1",0.362266128727056,0,4.65609352315758,0,1,NA,NA  
"Gm11943",0.178140125536298,0.800602707544408,4.78471990596029,0.16732  
4884900181,0.867114424834404,NA,NA  
"Gm11855",0.43035113349013,-0.0593692304621238,4.46235647110267,-0.013  
3044571509665,0.989384892211164,NA,NA  
"Gm15077",1.92948854668786,1.26487816816924,1.57815039481096,0.8014940  
60596646,0.422845681137721,0.566058708604414,0.71978838378166  
"Gm12704",0.0792066383645282,-0.0500573581824368,4.78471990596623,-0.0  
104619202724946,0.99165274760877,NA,NA  
"Psm7-  
ps2",6.8160084827614,-0.747295333021814,0.609371798348874,-1.226337246  
07317,0.220071790590651,0.355830481212083,-0.77218089377665  
"AU015836",1.18818514142281,-2.18034469724172,1.81516759608147,-1.2011  
8092783751,0.229681025932528,NA,NA  
"Gm12846",69.6458184906038,0.662573285854339,0.630471868663236,1.05091  
649411601,0.293296944233838,0.437340877750839,0.547976165617979  
"Rps24-  
ps3",2.01404104701145,-1.36943636398057,1.20522592112234,-1.1362486816  
6236,0.255852501665143,0.396645629121965,-1.26633426472461  
"Gm15427",6.44545416929641,-0.574429984747226,0.754126172333216,-0.761  
716017586258,0.446229513350519,0.587321658654544,-0.305701665079634  
"Gm6305",0.578637778040167,-1.58886241900515,2.64135680790208,-0.60153  
2672243217,0.54748525722022,NA,NA  
"H3c15",158.038522493936,-0.3237755527118,0.346736171441828,-0.9337807  
22574885,0.350417015432243,0.495354960262297,-0.227446071071505  
"Gm11945",2.07782651253,3.77219706392703,1.33642478532108,2.8226033409  
1362,0.00476354672074112,0.0191346588300392,14.9237696848237  
"Gm12912",0.32961231367796,0.945931840795429,3.80755013094843,0.248435  
820478562,0.80379722138249,NA,NA  
"Gm13181",0.458461162110919,-2.39870919376346,3.00610155098346,-0.7979  
46826839138,0.424901347667654,NA,NA  
"Rpsa-  
ps4",0.856461436342753,-0.963632173865517,2.1055039724904,-0.457672930  
783278,0.647187438409203,NA,NA  
"Gm12568",18.2726608061811,1.69085665136959,0.891039418165858,1.897622  
72790366,0.0577457982533653,0.129879752490958,3.45128569196654  
"Gm13059",0.091991025955798,0,4.78471990596463,0,1,NA,NA  
"Gm6079",0.0938488985102299,1.30200381849554,4.78471990596623,0.272117  
04009508,0.785532027658222,NA,NA  
"Rps15a-  
ps7",3.45088236055845,-0.712034228639625,1.07445723410491,-0.662692014  
198957,0.507527825371964,0.64208905518925,-0.315451292255892

"Rpl19-

ps11",42.3221947249048,-0.393587511222248,0.550462210703521,-0.7150127  
72119673,0.474601151227308,0.612265002423585,-0.193090128497774

"Gm12691",0.355618406598654,1.11505072937199,3.68122286057611,0.302902  
261450557,0.761964347881964,NA,NA

"Rps12-

ps26",5.00169639992252,-0.690824008516175,0.725406458063596,-0.9523267  
96704105,0.340931271867079,0.485536333274729,-0.499121145597786

"Gm15989",1.416071491943,-0.964335888093029,1.50970592408581,-0.638757  
437927504,0.522980740549299,0.656140433641994,-0.406352278204813

"Gm5913",0.182854006480543,0.388582487920829,4.78471990596623,0.081213  
2153099061,0.935272389935931,NA,NA

"Gm7308",0.377006159563081,2.18211656062588,3.61315947356223,0.6039358  
56303216,0.54588628869884,NA,NA

"Gm6758",0.117597376238333,-0.0663779635412635,4.78471990596548,-0.013  
8729047563484,0.988931378522404,NA,NA

"Gm12791",0.102032324652483,-0.070979088379274,4.78471990596623,-0.014  
8345336350343,0.988164188752275,NA,NA

"Gm13328",0.0820863251147936,-0.544048378937456,4.78471990596623,-0.11  
3705376621746,0.90947135024012,NA,NA

"Gm12990",1.79934237987743,-0.841399415122603,1.37038654465619,-0.6139  
86920992208,0.53922396997525,0.670180326783365,-0.336735162788877

"BC022960",96.5103173317995,0.610774494854981,0.332377671255816,1.8375  
918350571,0.0661225728562809,0.143629405499677,1.1852194323711

"Gm15823",401.635702877405,1.3477306919377,0.44149790277173,3.05263214  
949975,0.00226843824751224,0.011016191519301,6.07609440459617

"Gm12430",0.159990391611245,1.69813073764696,4.75493930901803,0.357129  
844838683,0.72099460277566,NA,NA

"Gm14425",0.547701245938728,-0.0715977421165848,3.54486037043551,-0.02  
01976198311553,0.983885726598984,NA,NA

"Gm13552",0.619770731236429,0,3.03009965671292,0,1,NA,NA

"Gm11783",49.7542660036552,1.73964669739068,0.309366190146369,5.623260  
56563457,1.87386425546227e-08,1.29562429975189e-06,23.5835515828111

"Gm8880",0.11785601150882,0.883984363971696,4.78471990596623,0.1847515  
38511047,0.853423920054532,NA,NA

"Gm12551",20.6644541064941,-1.7217180276914,0.614689598882507,-2.80095  
519888648,0.00509515920592992,0.0201716577050196,-6.72068628035205

"Gm12922",5.72163130898633,0.128457983895786,0.805328636588933,0.15951  
0016233726,0.873267067538363,0.920724667866923,0.0106098891065729

"H3f3a-

ps2",0.4805916018378,0.443997300415183,2.61392772316453,0.169858292744  
859,0.865121581966382,NA,NA

"Gm13136",3.78311633412529,0.635520991109641,1.03857093157737,0.611918  
71617706,0.540591537933236,0.671229641760802,0.253346606126876

"Gm7212",0.281132628767166,1.29572609697428,4.74763088466444,0.2729205  
63635153,0.784914278887195,NA,NA

"Gm14935",0.211918637745288,-1.09583239551227,4.77942654751899,-0.2292  
81145890006,0.818650406588931,NA,NA

"3110067C02Rik",18.9959395270992,0.129532449521523,0.372674760155759,0  
.347575053023137,0.728159344265225,0.821473868233177,0.025473223527616

5

"Hspd1-

ps4", 31.8847765852338, -4.0349334459277, 1.06287038864601, -3.79626103900  
383, 0.00014689482195864, 0.0013427825778479, -26.6830603412812

"Gm11271", 0.419626910292347, -0.555525789783965, 3.1917802524109, -0.1740  
48883648663, 0.861827044874013, NA, NA

"Gm8424", 0.445596616367007, 0.89111150237877, 4.65432548515489, 0.1914587  
84999243, 0.848166167993364, NA, NA

"Gm13858", 2.41225168876536, -0.194392485269203, 1.18612217167082, -0.1638  
89091623145, 0.869818454610993, 0.918330096816393, -0.0165619229643629

"Smt3h2-

ps4", 0.490320494323238, 0.885756307342417, 4.70988337598081, 0.1880633206  
03551, 0.85082701393518, NA, NA

"Gm5940", 1.44622220196459, 0, 4.78471990594897, 0, 1, 1, 0

"Gm11400", 66.7507656064717, -0.477075165684186, 0.357657159278433, -1.333  
88960155775, 0.182240039925494, 0.310312656117172, -0.558261394623814

"Gm12933", 0.374216154693866, 0.797715023598445, 2.61280831996565, 0.30530  
9431810495, 0.760130493120564, NA, NA

"Rpl35a-

ps2", 29.5258531232967, 0.369660569067314, 0.522758514351345, 0.7071344778  
11424, 0.479482911863317, 0.616848628629649, 0.178594709454233

"Gm15268", 1.54364358367278, -1.28315593023704, 1.43611084296783, -0.89349  
3657902685, 0.371592866944821, 0.516821293936095, -0.846957496016611

"Bambi-

ps1", 21.5033105081672, -1.54390976617301, 0.514853652114788, -2.998735193  
64449, 0.00271102821661653, 0.0125467904504128, -6.75968528780767

"Gm14542", 17.720495857471, 1.72999947882199, 0.628134026966924, 2.7541884  
4474268, 0.00588378794803186, 0.02248571097819, 6.5651321859216

"Gm14760", 9.83904195419991, 0.143052641825314, 0.851340766506394, 0.16803  
2176366172, 0.866557965874811, 0.916127919461425, 0.012531307566408

"Gm12247", 2.03197861432413, -0.350695937377231, 1.24497323809766, -0.2816  
89538895711, 0.778181576559713, 0.856649976273785, -0.0542617350330584

"Cyp2j12", 0.974742580636126, 2.13892770051614, 2.06599276410637, 1.035302  
60980431, 0.300527611416606, NA, NA

"Gm16089", 0.514404220696487, 1.2740254336162, 2.98318772163484, 0.4270684  
75904699, 0.669329453113653, NA, NA

"Gm9097", 0.297116296686132, -0.988551817126924, 3.2250157917157, -0.30652  
6194279817, 0.759204038899407, NA, NA

"Olfr1120", 12.8597379506932, 0.301533287444571, 0.527880726412654, 0.5712  
14807355661, 0.567854042074118, 0.694954689452746, 0.109730565706627

"Gm14788", 0.100532412451372, 0, 4.78471990596383, 0, 1, NA, NA

"Gm13574", 0.177214992908293, -1.05197271949365, 4.78066889257502, -0.2200  
47182336242, 0.825834408936131, NA, NA

"Gm11836", 0.0949500915947116, 2.04836625511614, 4.7634299069052, 0.430019  
186835683, 0.667181684222319, NA, NA

"Gm15719", 0.0878501130459839, -0.0428822859559626, 4.78471990596623, -0.0  
0896233986497124, 0.992849183123016, NA, NA

"Gm13529", 0.118469239322782, 1.34722634297173, 4.78471990596623, 0.281568  
486650979, 0.77827440689019, NA, NA

"Gm6587", 1.78463598003481, 2.98988420364462, 1.19007092695457, 2.51235799



138109,0.0119927361657042,0.0389594084903198,9.70287681221769  
"Gm13787",12.8963965013852,1.07700533028526,0.509453105588053,2.114042  
13355829,0.0345116688425561,0.0875043587896175,2.62365679080438  
"Gm11517",13.2292864163406,-0.471788436988748,0.527029578063471,-0.895  
183983263897,0.370688745248334,0.515830312736545,-0.31231329177042  
"Gm12164",1.12369494390068,-1.8488577930185,1.62779916075805,-1.135802  
15396935,0.256039375404016,NA,NA  
"Gm12112",8.70406815486885,-0.409274550832348,0.673970828962246,-0.607  
258553701104,0.543679339097933,0.673999221371535,-0.161469583762441  
"Gm5380",3.5449996585122,-1.19166380982463,1.25083104396658,-0.9526976  
60945218,0.34074327882677,0.485374959860049,-0.861374610220064  
"Gm15791",0.147195314619965,0,4.78471990596623,0,1,NA,NA  
"Gm13607",2.97131369694132,-0.334620410328832,1.0088708920039,-0.33167  
8129462315,0.74013231685383,0.830662517355435,-0.0620826878654681  
"Gm6893",0.550504170155642,0.393117423570207,3.16204101141057,0.124323  
948409145,0.90105878631009,NA,NA  
"Gm15370",0.453428410026644,2.53048893951056,3.54264587587728,0.714293  
504959459,0.475045707632724,NA,NA  
"Gm14859",0.157502682527355,-1.19648096621745,4.77621924155054,-0.2505  
07965758505,0.802194545266423,NA,NA  
"Gm14021",2.14968468259933,-3.24340248776914,1.43990699982848,-2.25250  
831349212,0.0242901679507065,0.0668751333949274,-8.77317046091642  
"Gm11653",2.16474518604492,0.738224338418921,1.32315743412906,0.557926  
305198022,0.576894708038064,0.702204143630637,0.260985272993151  
"Gm13509",1.7386093766043,-1.907787689173,1.49371614896039,-1.27720898  
679498,0.201528475075643,0.333339176028579,-2.09588555992208  
"Gm15727",0.157863633167365,0,4.78471990595081,0,1,NA,NA  
"Gm13132",0.346902779969996,1.34954284565876,4.74078762312925,0.284666  
378868068,0.775899751116873,NA,NA  
"Gm6274",0.118397724875524,0,4.78471990595411,0,1,NA,NA  
"Gm13836",0.115573525299121,0,4.78471990596623,0,1,NA,NA  
"Gm11673",0.176981228059683,1.3904336483191,4.78471990595304,0.2905987  
55130714,0.771358212272777,NA,NA  
"Gm12020",2.32337846286544,0.198494091799182,0.850913822422351,0.23327  
1674015256,0.81555045276835,0.882441882801182,0.024824137090453  
"Gm16011",6.00501940419622,-1.31315497022666,0.831603976845613,-1.5790  
6287943407,0.114321635009858,0.218279957982983,-1.99859143777535  
"Gm12879",49.39867626771,0.64051316335092,0.283382863137144,2.26023957  
927527,0.0238063856463115,0.065807134831778,1.74285362057927  
"Gm14480",0.672633084538552,-2.29909305794071,2.6564757168013,-0.86546  
7372202852,0.386782316676447,NA,NA  
"Gm16205",0.109847963812737,-0.0650179634024476,4.78471990596623,-0.01  
35886665636111,0.989158146409427,NA,NA  
"Gm12757",0.968186221773283,1.99631024023205,2.39736828497314,0.832709  
038801025,0.405008845566255,NA,NA  
"Gm15304",0.639052495752292,0.622519700962423,1.87529715447642,0.33195  
7897699807,0.739921050730969,NA,NA  
"Gm13013",0.0861828411948613,-0.544048378937457,4.78471990596623,-0.11  
3705376621746,0.90947135024012,NA,NA  
"Gm12664",0.130790259896863,0,4.78471990596536,0,1,NA,NA

"Gm16044",5.22593704548368,0.133397030936978,0.950332538637191,0.14036  
87925158,0.888368613666138,0.93070824938275,0.00957916398121017  
"Gm12275",6.20840783803051,0.766666965124728,0.627718314705629,1.22135  
51001523,0.221951599524046,0.357801760026445,0.787962051568794  
"Gm14891",0.166168677439249,-0.543954474583284,4.78471990596623,-0.113  
685750738514,0.909486908545045,NA,NA  
"Gm11434",10.8141782861729,2.07485115143009,0.557876167291642,3.719196  
61222133,0.000199857442127582,0.00169500673184033,13.2376926115515  
"Gm16071",0.0986343186894943,0,4.78471990596623,0,1,NA,NA  
"Gm14303",169.980936222407,0.508225426315368,0.329781678547087,1.54109  
660838178,0.123293275201096,0.231151180756824,0.744389304915379  
"Gm15264",0.600652126779348,-0.551697985707116,2.39362669084738,-0.230  
486227370654,0.817713964391763,NA,NA  
"Xlr4e-  
ps",4.85591515956004,0.649018571499376,0.931144113927373,0.69701194669  
2065,0.485795317386625,0.622914448139182,0.307210404476256  
"Cyp2j7",68.5622756992265,1.82194178764508,0.670560482675839,2.7170431  
8210746,0.00658680132449081,0.0245703945331781,6.75250440249356  
"Gm8595",0.257991723548045,-1.4643457940774,4.76575423922323,-0.307264  
227354719,0.758642261922931,NA,NA  
"Gm15011",0.133037321563944,-1.09148944917188,4.7792627781536,-0.22838  
0296258487,0.819350606036027,NA,NA  
"Gm14686",8.58714443069833,1.47548795734968,3.03697123695305,0.4858419  
26784269,0.627079245321982,0.743586396964544,0.437143284539671  
"Gm11694",0.191248344767664,-1.2542747389479,4.77430148087604,-0.26271  
3769537184,0.792771202933684,NA,NA  
"Rps13-  
ps4",67.1453163264406,0.503208720354897,0.355906444772268,1.4138792026  
5642,0.157397373300833,0.278109105991812,0.643977220826619  
"Rpl18-  
ps1",0.420928496999757,2.0151164825524,3.79010520833238,0.531678244213  
975,0.59494886247437,NA,NA  
"Gm11668",0.264329015450333,-1.52606969387194,4.76384496148845,-0.3203  
44114094579,0.7487074854278,NA,NA  
"Gm13215",0.327791923811178,-0.61672961359275,3.90293557220177,-0.1580  
16857358686,0.874443515349237,NA,NA  
"Gm15132",0.309017199155003,-1.84176969787019,4.75383926422832,-0.3874  
27844211969,0.69843949353769,NA,NA  
"Gm14815",0.292550171621104,-1.9849939550408,4.749839001085,-0.4179076  
28992765,0.676014654462581,NA,NA  
"Gm14921",0.404097276845139,-0.323174652066184,4.71128767987902,-0.068  
5958222093714,0.945311344429436,NA,NA  
"Gm13680",1.52362025134112,-1.38494136987327,1.40467493859875,-0.98595  
1505089736,0.324156910664198,0.469013445343985,-1.04857213206092  
"Gm15455",1.19236625411479,-0.51150760971271,1.64491362404468,-0.31096  
3203317001,0.7558285952414,NA,NA  
"Gm15694",2.8498326833144,-0.230058882739998,1.04334975832476,-0.22050  
0250183973,0.825481577553685,0.888405354039948,-0.0272222143126217  
"Gm13142",0.505448995883486,0.480086340801749,2.17900580987356,0.22032  
3570789197,0.825619164313991,NA,NA

"Rps6-

ps4",832.131413905171,3.28857517999822,2.57324858186846,1.277985812630  
02,0.201254428718127,0.333055410893401,3.61561215516055

"Gm14830",5.10944747197196,0.0516382509793396,0.738392273962363,0.0699  
333576477422,0.944246702552442,0.965590927066005,0.0018081136371425

"Gm12882",0.14728986473751,0,4.7847199059615,0,1,NA,NA

"Gm14774",0.268191251623547,-2.05586317299311,4.74795630416205,-0.4329  
99598414784,0.665015061571623,NA,NA

"Gm15483",0.690533051273717,1.98335137792598,1.94506815544688,1.019682  
20104364,0.307879205747722,NA,NA

"Gm12593",0.362823479679351,-0.536918378143231,3.20120187255285,-0.167  
723998522797,0.866800415545982,NA,NA

"Gm14165",0.344637239825591,1.16928487436404,3.87270852776736,0.301929  
480615505,0.76270582161897,NA,NA

"Gm5912",0.0908326761198619,-0.056137466949588,4.78471990596623,-0.011  
7326547954433,0.990638910649065,NA,NA

"Gm6161",55.8932795873299,0.483142026932315,0.48570932172726,0.9947143  
39049916,0.319875218480033,0.464991203304532,0.369959625396233

"Gm3880",1.64931713173039,-4.67402252541485,2.79840280799641,-1.670246  
51063774,0.0948706012823783,0.189663383964299,-7.77058320779484

"Gm15803",0.278972036476992,-1.84845254986704,4.75336351361649,-0.3888  
72541427131,0.697370435366168,NA,NA

"Rpl23a-

ps4",0.21270014869273,-0.549309477165327,4.78471990596623,-0.114804939  
047816,0.908599734150947,NA,NA

"Gm12734",0.459154451667943,-2.52905216316799,4.7378412792833,-0.53379  
8414528265,0.593481010820577,NA,NA

"Gm14761",0.492108799408597,0.895939878254211,2.3711270368384,0.377854  
018082825,0.705539042647828,NA,NA

"Gm6767",0.600299549689229,0.560812625808008,1.90824811478021,0.293888  
73567555,0.768842925850041,NA,NA

"Hmgb1-

ps3",8.15319982287162,0.0268640165927415,0.663299939867374,0.040500556  
351796,0.967694063502353,0.980211899328219,0.000536917852622142

"Llph-

ps1",0.407591278803953,-1.57959105966084,2.34840367523353,-0.672623312  
729128,0.501186966488929,NA,NA

"Gm13168",0.388288786915528,-0.93876290200649,4.75235717616173,-0.1975  
36268257658,0.843407902569059,NA,NA

"Gm14912",0.302893118340962,-0.547892326878724,3.21217755943611,-0.170  
56726060153,0.864564042874021,NA,NA

"Gm14735",898.894494837967,0.56120196123209,0.287910235129934,1.949225  
46250855,0.0512685054525853,0.118650839087775,1.19624139030685

"Gm4853",0.935097765055502,-1.07824694485328,2.28035236431685,-0.47284  
2250928313,0.636325727996839,NA,NA

"Itpa-

ps1",2.35807855162009,-0.653963918366611,1.1825554562956,-0.5530090913  
58115,0.580257184841258,0.704803939884488,-0.228779869112682

"Gm13608",0.461992590283959,1.33071484266024,2.2438982216577,0.5930370  
77090406,0.553156339138315,NA,NA

"Gm12338",665.384876171769,2.05789967968937,0.30347619368128,6.7810909  
8023892,1.19271732826668e-11,4.65112049330873e-09,39.4831877442897  
"Gm13689",180.611797467658,0.544025623779444,0.49615735549119,1.096477  
99787401,0.272869646796634,0.41549491395867,0.477809493589699  
"Gm15368",2.35580453882363,-0.978436660043303,1.59216151569764,-0.6145  
33544741899,0.538862813416465,0.669902265748165,-0.391984669624233  
"Gm11830",0.845619241011868,-3.56018296762627,4.21822375837012,-0.8440  
00501529082,0.398669125348589,NA,NA  
"Gm12778",0.518169919514796,1.01533173692706,3.10373663214813,0.327132  
05315502,0.743568009446409,NA,NA  
"Gm15560",0.163369031073948,0.904520550403997,4.78471990596623,0.18904  
3573747362,0.850058665550759,NA,NA  
"Gm8644",0.25520067168023,-1.97432040980842,4.7499139169112,-0.4156539  
3485958,0.677663253846572,NA,NA  
"Gm11475",0.928415721672897,-1.33180179013113,2.31015211622238,-0.5764  
99608306715,0.564277534540479,NA,NA  
"Gm12311",0.0869374294683173,0,4.78471990596623,0,1,NA,NA  
"Gm12470",0.669165992756613,-2.40220003351572,2.30511978175856,-1.0421  
1505732821,0.297358338377025,NA,NA  
"Gm16204",0.391504313242135,-0.0576432003217825,3.82575156445191,-0.01  
50671572240579,0.987978602725508,NA,NA  
"Gm13331",0.207165366049677,0,4.78471990596576,0,1,NA,NA  
"Gm16200",0.780757379270897,0.97380743576962,1.82284720377883,0.534223  
292962176,0.593187055455552,NA,NA  
"Gm13170",1.55795308504663,1.04784213380975,1.72746009050602,0.6065796  
48102211,0.544129909944149,0.674386281724576,0.412799728488292  
"Slc48a1",5849.52847650486,0.154055667308374,0.22538844255411,0.683511  
832117962,0.494283476154031,0.630247037464415,0.07111878412484  
"Gm11990",0.268012445201858,1.62715937405076,4.72843874278489,0.344121  
910542595,0.73075460582205,NA,NA  
"Gm11692",0.0964741161665989,1.36019450077017,4.78471990596623,0.28427  
8814121198,0.77619672055633,NA,NA  
"Gm15877",1.5533563975572,1.52067561188844,1.29780338532201,1.17173034  
766829,0.241305334815839,0.379830393693235,1.47206030947748  
"Gm14654",130.09562830469,0.350027597130638,0.321795080399835,1.087734  
45726928,0.276712351491025,0.420295819067695,0.303402690676391  
"Gm12328",0.33034922765651,-0.535953470481758,3.2283747069325,-0.16601  
3402759868,0.868146402658349,NA,NA  
"Ccdc50-  
ps",8.32889433158777,1.04739838068689,0.828040000033421,1.264912782769  
7,0.205902594556218,0.338906701726923,1.13331691565396  
"Gm5697",52.5031838105888,1.27105905547347,0.29090510395855,4.36932538  
541702,1.24630948531859e-05,0.000201163430006141,10.8184830147361  
"Gm12411",0.916859372672499,-1.36039941955333,1.51129228450176,-0.9001  
56398271978,0.368037026004719,NA,NA  
"Gm11575",1.14449272505975,2.63157687490589,1.98262794604606,1.3273175  
5352991,0.184403659616059,NA,NA  
"Gm13717",100.574701205755,0.554274977625906,0.477476023010548,1.16084  
358358171,0.245705515173935,0.384774960622724,0.529386165138611  
"Gm12490",0.212401220253179,-0.0269273073713768,4.7847199059584,-0.005

62777088327454,0.995509712203098,NA,NA  
"Gm14429",10.3072514874279,0.198538995514318,0.445513645926921,0.44564  
0660683343,0.655856834475155,0.765604775106063,0.0530276218353051  
"Gm14769",3.69268079150779,0.554487979620474,1.07555006356591,0.515538  
977127766,0.606176440025778,0.726787484894267,0.176948848411115  
"Gm11661",0.435901153773867,1.07587105968201,4.66890343100717,0.230433  
350267414,0.817755048574709,NA,NA  
"Gm11841",22.8952249499977,0.230609355554607,0.451960869875066,0.51024  
186146547,0.609882028032481,0.729717708798314,0.0726644360018738  
"Gm15968",4.55762210662926,3.50873496758849,1.03756055132864,3.3817158  
5561479,0.000720346133895788,0.0045705528534657,18.905488937356  
"Gm12286",13.2853497291425,1.53559543906013,0.513166149219901,2.992394  
25943136,0.00276798537503756,0.0127408354207938,6.69971545822157  
"Gm15369",0.0966504601457139,0,4.78471990596623,0,1,NA,NA  
"Gm14681",0.690582698537919,1.57308191686327,2.65932444376267,0.591534  
410384887,0.554162406187277,NA,NA  
"Gm11518",4262.67077034115,0.36859667683939,0.158415968834409,2.326764  
6535349,0.0199777946345698,0.057393110326336,1.05338701399861  
"Gm15953",0.136005112736276,0,4.7847199059646,0,1,NA,NA  
"Xlr5e-  
ps",0.238284961649088,-0.434123795282801,4.76963291978142,-0.091018282  
2418744,0.927478064224199,NA,NA  
"Gm9436",0.218240849958048,-0.063843759662345,4.78471990595406,-0.0133  
432595673779,0.989353935110144,NA,NA  
"5033423K11Rik",0.895350150644667,-1.39199450735046,1.96061866362824,-  
0.709977178720973,0.477718288239177,NA,NA  
"Gm13351",1.7684711468886,0.471192901193562,1.09657727944498,0.4296942  
03979905,0.667418100155845,0.774783101958063,0.120235309073962  
"Gm14633",1.15948772360744,-0.40065106618977,1.35187500019298,-0.29636  
6946746244,0.766949864747534,NA,NA  
"Gm5937",0.118987874983649,0,4.7847199059607,0,1,NA,NA  
"Eif3s6-  
ps1",0.139184173788803,1.36149981216929,4.78471990595964,0.28455162244  
157,0.775987679210004,NA,NA  
"Gm12005",0.113582498381052,0,4.78471990596623,0,1,NA,NA  
"Gm8522",2.48259459461259,0.451878326066654,1.09403794842879,0.4130371  
59008626,0.679579389090441,0.784328100419405,0.10977383054899  
"Gm15901",0.087583724926668,0,4.78471990595887,0,1,NA,NA  
"Rplp0-ps1",0.106515742275206,0,4.78471990596623,0,1,NA,NA  
"Gm13532",0.0984406529250204,-0.0792257193923823,4.78471990596623,-0.0  
165580683821414,0.986789176551689,NA,NA  
"Gm11605",0.294384134235874,1.32977699211102,4.78471990596557,0.277921  
59588131,0.781072545609813,NA,NA  
"Gm13022",0.213452081220796,-0.56242877278923,4.78471990596076,-0.1175  
46854119624,0.906426717146809,NA,NA  
"Gm13423",93.8880760071818,0.694504696496248,0.38268800580884,1.814806  
54202465,0.069553644700824,0.149356493874082,1.32054460215733  
"Gm16181",4.66822549555916,-0.688656260661577,1.07785819539295,-0.6389  
11745167475,0.522880346844031,0.656056692584616,-0.290274172805002  
"Gm15530",6.37521971014632,0.935382357070846,0.59803857170667,1.564083

65835246,0.11779792315125,0.223252712441978,1.40255992604317  
"Gm15466",2.34497255273511,0.360023416889325,1.18256843456881,0.304441  
930263933,0.760791227110511,0.845188726921585,0.0605542578051196  
"Gm14917",0.385621353365833,-0.558684354276765,3.83671212556129,-0.145  
615395680757,0.884225013541144,NA,NA  
"Gm11787",0.120519204726127,-0.0579881638098586,4.78471990595946,-0.01  
21194479404391,0.990330316318947,NA,NA  
"Gm15544",0.541246839346015,-0.976580349891196,3.81560812422108,-0.255  
943566031314,0.797994413863457,NA,NA  
"Gm15922",35.1214836220075,-2.56530544915417,0.497413186592188,-5.1572  
9280666895,2.5054584599507e-07,9.21725076455072e-06,-29.7432640699582  
"Npm3-  
ps1",0.330400510351801,-0.0596616732638322,3.86329606172819,-0.0154432  
050535478,0.987678594881029,NA,NA  
"Gm15697",33.0635054136148,0.611903162837111,0.326464803891129,1.87433  
118530343,0.06088479178405,0.135095543015473,1.22489124517129  
"Gm13167",0.268784500828289,2.55810952129487,4.72907969195938,0.540931  
785447451,0.58855460137054,NA,NA  
"Gm6184",0.723817810280747,-1.36211361051027,2.39115372887493,-0.56964  
7026061833,0.568917126261482,NA,NA  
"Gm12712",5.93214349584601,0.283544727981993,0.770273387297101,0.36810  
9209870219,0.712791803844467,0.809483056168643,0.0599298541597214  
"Gm11874",0.203615845152126,-0.0673409065301508,4.78471990596578,-0.01  
40741585408558,0.988770816911576,NA,NA  
"Fzd10",24.1721638394895,-2.15923498695125,0.487833328249614,-4.426173  
57591939,9.59193511354134e-06,0.000165801020251622,-18.7955406433924  
"Rps2-  
ps13",0.281278830727475,1.37707858292325,4.78471990595803,0.2878075644  
94734,0.773494046634576,NA,NA  
"Gm9166",0.139818166219533,0,4.7847199059606,0,1,NA,NA  
"Gm12317",0.357316764641346,-2.47068310107588,4.73880849697638,-0.5213  
72218913744,0.60210750050533,NA,NA  
"Gm15971",0.80249308751102,1.8873832688079,2.11697653614912,0.89154661  
6875186,0.372635994344323,NA,NA  
"Rpsa-  
ps5",0.394836117164022,0.344040974038485,3.83776166525268,0.0896462584  
306503,0.928568323454905,NA,NA  
"Gm11785",0.317241914076929,0.131511359060141,3.85881410060912,0.03408  
07708356258,0.97281274222703,NA,NA  
"Gm12096",0.300931936805614,-1.76414434044466,3.9156730301731,-0.45053  
4129599343,0.652325350631768,NA,NA  
"Rps11-  
ps3",0.531877106463248,0.6889470508347,1.94255905833743,0.354659513633  
705,0.722844685116514,NA,NA  
"Gm14839",0.0756569351367057,-0.0568979650704299,4.78471990596623,-0.0  
118915978758719,0.990512101266211,NA,NA  
"Gm13882",0.559888033034874,2.19358437394321,1.7243427067105,1.2721278  
4640002,0.203327698708751,NA,NA  
"Gm15931",18.5892229302631,-2.49129496088985,0.779449815815657,-3.1962  
223998768,0.00139239740538651,0.00759199234066728,-12.1591667194994

"Olfr129",9.28973878801355,0.143608901164542,0.52711756793619,0.272441  
879952532,0.785282274539282,0.861162632498352,0.0214654959562492  
"Gm13785",56.2900528547927,-0.250670083146333,0.405797710828255,-0.617  
721777273464,0.536758754208438,0.668266534037171,-0.101037134689661  
"Gm15495",2.30616502245619,3.59923898350096,1.41257688505136,2.5479951  
0142778,0.0108343992409249,0.0360801223568838,11.9567193862487  
"Gm12852",0.166685142581975,-0.531860332618984,4.78471990596623,-0.111  
158091397532,0.911490983836668,NA,NA  
"Hmgb1-  
ps2",5.12701923965215,-0.741107642812371,1.09871819493532,-0.674520223  
865044,0.499980632562885,0.635389870411235,-0.336104543802269  
"Mdm4-  
ps",13.3032190010861,0.721018154587855,0.433060737647832,1.66493540491  
355,0.0959256437155138,0.191145447231997,1.19308361997608  
"Gm14279",0.524684137425071,0.1109150007998,2.60991612399896,0.0424975  
346065351,0.966102077075563,NA,NA  
"Gm15549",0.324077079111625,-1.09526827112963,4.7795501350342,-0.22915  
7188477068,0.81874674585625,NA,NA  
"Gm14870",0.942490942903677,-0.491321383867411,1.87026729895714,-0.262  
701157284507,0.792780924724266,NA,NA  
"Gm14251",18.0665302562124,0.429007497735145,0.591046241274024,0.72584  
4219583228,0.467934275172902,0.606272354474852,0.214686490638646  
"Sms-  
ps",199.486662479362,-0.332106971848272,1.55960414893451,-0.2129431189  
80005,0.831371329503808,0.892330627692681,-0.0378331467471552  
"Mup-  
ps23",0.25131098961073,-0.0473428415815626,4.78471990595937,-0.0098945  
8996807673,0.992105388246785,NA,NA  
"2210409E12Rik",3.64288235321124,-0.45934750382784,0.952811225409637,-  
0.482097073982682,0.629736988337246,0.745649590004228,-0.1348182662016  
27  
"Gm12216",235.37049473405,-0.422224093985129,0.230239543939336,-1.8338  
469871899,0.0666767106750561,0.144572242129926,-0.816571243626098  
"Gm15381",0.642710991769,3.61724311933357,2.42009861973556,1.494667651  
07647,0.135001200778057,NA,NA  
"Gm8302",0.0834859128705577,0.894347003437588,4.78471990596623,0.18691  
7316167744,0.851725462135043,NA,NA  
"Gm21998",0.250902407609146,-0.0604938755588199,4.78471990595718,-0.01  
26431383127574,0.989912503886809,NA,NA  
"Gm15599",0.158171827562892,-1.30683657695417,4.77224777175327,-0.2738  
4088996579,0.784206898594094,NA,NA  
"Gm5898",1.45690687374438,-0.941283031219469,1.47572641786247,-0.63784  
3857659526,0.523575326932085,0.656564801396286,-0.396029664471452  
"Anp32b-  
ps1",2.38605249320918,0.647884711001607,1.29174212910189,0.50155886101  
823,0.615977863725388,0.734998624295786,0.19947505421373  
"5730416F02Rik",1.02925365916483,2.41753385035136,2.11424861917271,1.1  
434482342466,0.252852535761583,NA,NA  
"Gm8152",1.01388970926901,-1.04446832513709,2.62600458184397,-0.397740  
480865296,0.690821494516918,NA,NA

"Gm14335",2.60748968761654,-0.227924573314297,0.963974117701287,-0.236  
442627586112,0.813089221686563,0.881001036090281,-0.0288772404624133  
"Gm14849",39.3512145798671,1.05549652961635,0.507678271667918,2.079065  
79524988,0.0376113034333721,0.0935244875857272,2.50103277923988  
"Gm15539",21.6997477760439,-0.105134626071478,0.334351805638954,-0.314  
44312337588,0.753184508099327,0.839656463060073,-0.0183735841323503  
"Gm12713",0.259850090598189,1.36563772837207,4.01344978491273,0.340265  
308290574,0.733656740079849,NA,NA  
"Gm15528",0.11659529170675,-0.949132880211107,4.78281748744769,-0.1984  
46393303125,0.842695822520151,NA,NA  
"Gm13590",0.142425137392067,2.57912268336951,4.72883040948399,0.545403  
928674817,0.585475739019112,NA,NA  
"Cyp4a28-ps",0.100532412451372,0,4.78471990596383,0,1,NA,NA  
"Ndufs5-  
ps",2.43399985522395,0.680779077280699,1.29525424181222,0.525594941367  
038,0.599169672220405,0.721152069689338,0.222550253753521  
"Gm11420",0.967593911325671,-0.0735070616559513,2.25692185280869,-0.03  
2569608719271,0.974017805695493,NA,NA  
"Gm15460",16.4426377726883,1.04065922763295,0.734946794277157,1.415965  
39468748,0.156785636600442,0.277430469410601,1.33431758713029  
"Gm13669",5.79315989617142,1.35050669541845,0.707793778047542,1.908051  
09808092,0.0563846122814611,0.12750953030201,2.7814552008378  
"Gm11790",0.883062780018481,0.133084773039615,1.7670540098884,0.075314  
4908389188,0.939964492206164,NA,NA  
"Gm7851",0.0886915477092957,-0.544048378937457,4.78471990596623,-0.113  
705376621746,0.90947135024012,NA,NA  
"Gm15847",1.96111633701403,-0.361352001393589,1.08483107374691,-0.3330  
95179644431,0.739062437912331,0.82981166316243,-0.06741257035459  
"Gm13323",45.4762975730101,-1.0656729225419,0.584218307822473,-1.82410  
05259043,0.0681368760539337,0.147026649988889,-2.043045695921  
"Gm12281",0.254183575612786,-0.177639772581399,4.78039082151421,-0.037  
1600940621692,0.970357356945649,NA,NA  
"Rpl17-  
ps5",2.84791168166853,-0.0273163335856979,1.22829609206348,-0.02223920  
90654687,0.982257141005273,0.988645970231303,-0.000311924635618357  
"Olfr650-  
ps1",1.40608853842027,-0.119849887005276,1.40498134050217,-0.085303543  
5776243,0.932020074436296,0.957507809105404,-0.00520405015170722  
"Gm11533",0.96399247279286,3.08940109630418,1.86377589694283,1.6576033  
1023261,0.0973975610989836,NA,NA  
"Gm14441",0.123399277423572,0,4.78471990595966,0,1,NA,NA  
"Gm15484",0.085691905297434,-0.0782833786850596,4.78471990596623,-0.01  
6361120446663,0.986946296983598,NA,NA  
"Gm15002",2.51648976794274,2.11682638509757,1.41184497964555,1.4993334  
3647191,0.13378715228308,0.245444288221255,2.97347488333807  
"Gm15141",0.210165528076269,1.35355347617658,4.74626867911247,0.285182  
649295296,0.775504212525046,NA,NA  
"Gm15197",30.4375867097123,0.421744717359378,0.424775182125296,0.99286  
5720754316,0.320775397005795,0.466021808421056,0.322011727206216  
"Gm11821",6.41178318994997,0.337719695857344,0.902525174046254,0.37419



4211495796,0.708259830259933,0.806418509783654,0.0726612126578001  
"Gm12097",36.68107937951,0.757413399049426,0.489715335701763,1.5466401  
4751356,0.121950043048343,0.229449188396854,1.11496832607176  
"Gm8864",0.156323777469693,1.37043127905442,4.78471990596623,0.2864182  
86960869,0.774557770156902,NA,NA  
"Rpl17-  
ps10",12.6718626258996,-0.665567354381271,0.820348224624543,-0.8113229  
6554416,0.41718022492174,0.56049812145886,-0.385316501158597  
"Gm5754",0.303762834497805,0,3.86239998788083,0,1,NA,NA  
"Gm12399",0.0979381719461325,1.35972931062325,4.78471990596623,0.28418  
1590008594,0.776271223154227,NA,NA  
"Gm11191",0.654113576653456,1.18945428852785,2.48020681626678,0.479578  
670910284,0.631527015713299,NA,NA  
"Gm15536",2.15603513812922,-1.7816663441307,1.735453046568,-1.02662895  
29723,0.304595215322149,0.449311356358849,-1.42540289445195  
"Gm11218",2.03778538066813,-4.17034911844852,1.74403370434103,-2.39120  
901624103,0.0167929896007573,0.0502655374939461,-12.4711603680527  
"Gm12276",126.130399380452,0.0978639601602495,0.241701393860873,0.4048  
96134842241,0.685553859620269,0.788813332333403,0.0232158341024904  
"Olfr607",58.3663257087315,0.248926986053991,0.347477385415346,0.71638  
3271263666,0.473754721594242,0.611456249529657,0.12245013984149  
"Olfr1191-  
ps1",30.112938686102,1.52060249218748,0.376516986128264,4.038602634701  
51,5.37705654073873e-05,0.000611322731377981,11.2522843884216  
"Gm14392",0.209264655857154,-1.70393280158598,4.75774425526995,-0.3581  
38796489241,0.720239446619107,NA,NA  
"Gm15352",0.109726490644631,0,4.78471990596514,0,1,NA,NA  
"Gm12435",0.793381103389268,2.04047159468439,2.45314635064794,0.831777  
359775313,0.405534625436344,NA,NA  
"Gm13626",1.51091690031817,-2.02150902363049,1.78339316850958,-1.13351  
842954513,0.256996606296751,0.397881517355412,-1.86302476417791  
"Gm11594",0.262078180926091,0.879251149198986,4.05536300313241,0.21681  
1947172138,0.828354900918773,NA,NA  
"Gm16480",0.527171663287022,3.17038983070321,4.69799600101743,0.674838  
767426922,0.499778207112649,NA,NA  
"Gm11620",8.83326762450227,-0.292360243148026,0.650267690681724,-0.449  
599829943148,0.652999010739845,0.763594501103844,-0.0788549336243018  
"Gm14017",0.995858912418011,-0.936995569154747,2.12151913338291,-0.441  
662558876216,0.658733407072162,NA,NA  
"Rpl23a-  
ps2",64.8096965015878,0.386423375864333,0.50803758389164,0.76061966302  
6257,0.446884271745244,0.587945312448635,0.205237701756152  
"Gm16397",0.662624584775868,-1.33809779859435,2.70740321775604,-0.4942  
36613821934,0.621139084643886,NA,NA  
"Gm11960",1140.50078205129,0.623197925158414,0.367237495069588,1.69698  
882473949,0.08969877333611,0.181595543817617,1.06315905307102  
"Gm12482",0.284012744648568,0.664028198207557,4.75028012959468,0.13978  
7166249544,0.888828153579513,NA,NA  
"Rps8-  
ps3",11.1051334571589,1.61951882229465,0.648650514556005,2.49675100219

907,0.0125336930956834,0.0402341040466964,5.20357921614594  
"Gm13702",1.12488332651615,1.35960026365838,1.47604336295525,0.9211113  
28962765,0.356992306064745,NA,NA  
"Dnajib3",61.4984155203591,-0.102789602657111,0.314213407823899,-0.3271  
33088842343,0.743567226142031,0.832983267757387,-0.0187839491724042  
"Gm13859",3.23553575501265,-1.68170965020343,1.08854088767365,-1.54492  
097563507,0.122365379132597,0.229943820486864,-2.47197908399743  
"Gm13408",3.42357611009091,-1.71869948429793,1.28403368386432,-1.33851  
588622307,0.180728325240932,0.308486464636933,-2.0213234685254  
"Gm13245",11.9997649589435,-1.21260841044532,0.630816580309037,-1.9222  
8366897278,0.0545700737662394,0.124178916478346,-2.52953980032056  
"Gm12488",0.233575329508174,1.27660355831842,4.78471990595827,0.266808  
420014033,0.789616670964946,NA,NA  
"Gm15206",0.239711496103095,0.382672050691248,4.78471990595986,0.07997  
7941909325,0.936254799568116,NA,NA  
"Gm12390",0.989299958805087,1.98297572852329,2.36703622578642,0.837746  
25285444,0.402173230467922,NA,NA  
"Pgaml-  
ps2",0.345308264136612,-0.514413785974859,3.1701587306083,-0.162267517  
083017,0.871095193251868,NA,NA  
"Gm14407",3.19623686129103,1.79171813098491,0.863379100222597,2.075239  
17422019,0.0379643736327761,0.0942007326408589,4.23262469043287  
"H3f3c",0.101599971162199,-0.0660999043584734,4.78471990596623,-0.0138  
147907625797,0.988977742337718,NA,NA  
"Gm13081",4.63998057247307,2.07826594307795,0.892744597413926,2.327951  
29659502,0.0199146899519527,0.0572793368761137,5.94345681064845  
"Gm8097",1.14192902195205,-0.825177289030117,1.80759609038808,-0.45650  
5351730959,0.648026623305273,NA,NA  
"Rpl17-  
ps8",29.4974155388573,0.31422584299106,0.697445146123422,0.45053843264  
6076,0.652322248652158,0.763215073760563,0.0849086644649475  
"Gm13724",0.261592698144515,2.13789756150788,4.75859925158605,0.449270  
35215149,0.653236642356356,NA,NA  
"Gm15923",0.247466305100361,0,4.78471990594723,0,1,NA,NA  
"Snrpert",0.214804333861831,2.70853423293755,4.72063317099657,0.573765  
029991889,0.566126815863386,NA,NA  
"Gm11585",2.61967290157558,1.63334788878846,1.53603584188912,1.0633527  
1889207,0.287622025840394,0.431660949101152,1.37219979850592  
"Gm12105",1.82075327792601,0.428521575913102,1.21340543777331,0.353156  
136088751,0.723971390139371,0.817986565737814,0.0860939980558857  
"Gm16072",2.6981284826671,0.877435310211524,0.983816823010972,0.891868  
577248083,0.372463378961366,0.517699669446016,0.577668305197181  
"Ywhaq-  
ps2",0.261984413159769,-0.257028091595579,4.77616579016437,-0.05381473  
40121402,0.957082770486293,NA,NA  
"Gm15789",2.319000416251,0.371192814493094,1.15290269414205,0.32196369  
7698984,0.747480196374084,0.835782134929573,0.0665872782604782  
"Gm12726",0.396445016187185,0,4.76770665348645,0,1,NA,NA  
"Ftl2-  
ps",9.88004550069874,1.04019320924692,0.606924801750927,1.713874941749

04,0.0865516960612198,0.176525624456241,1.80399588209146  
"Gm12993",19.173630207572,0.713973101175362,0.544679497620713,1.310813  
24759636,0.189920865723503,0.319407694646124,0.814848184844357  
"Rpl5-  
ps2",1.63009940988744,-1.17987364526887,1.35666010733296,-0.8696899384  
68354,0.384469872234449,0.529161847486556,-0.750943494112073  
"Gm2673",7.06073416118091,-2.90688147202347,1.15852425844561,-2.509124  
38892184,0.0121030856438169,0.0392133539187672,-9.41462727856291  
"Gm12098",104.884172781561,0.447949760052949,0.452080788072468,0.99086  
2190722301,0.321752876692753,0.466993045310299,0.341087274583411  
"Dnmt3c",1.33103723083843,-1.37732546349454,1.8634041298644,-0.7391447  
94959089,0.459819078590332,0.59954208869562,-0.704624695168224  
"Gm13230",1.88785993656271,-0.327963617758239,1.11186046310482,-0.2949  
68324390649,0.768018077169827,0.849936453053083,-0.053324815914285  
"Gm12138",1.98048591431195,-1.54076029264244,1.3044788195272,-1.181130  
93871534,0.237550711004635,0.375680409049263,-1.50842970737873  
"Gm15753",5.53847165104538,-0.169328587690754,1.30048191310966,-0.1302  
0449264524,0.896404640224233,0.936209634961278,-0.011161439244199  
"Gm15928",1.13084246127262,1.15726457723273,1.45005410413932,0.7980837  
22482632,0.42482190676622,NA,NA  
"Gm11991",75.1798408129271,-1.11259932327721,0.432982924446607,-2.5696  
1478261346,0.0101811657308965,0.0343209490700242,-3.75168419622434  
"Gm12013",0.850683551891035,3.00309481361973,1.84154171507165,1.630750  
35935468,0.102943005743237,NA,NA  
"Glms-ps1",0.106415820905437,0,4.78471990596623,0,1,NA,NA  
"Slfn14",0.35098576214799,-2.43846589750161,4.73942720313052,-0.514506  
456791009,0.606897947282855,NA,NA  
"Gm15320",2.84886586673009,-0.57765835000106,0.990793004383117,-0.5830  
2627031639,0.559875615589581,0.688348566265745,-0.215732248302312  
"Mageb16-  
ps1",0.183945604905163,1.58341655250876,4.76310708924005,0.33243354030  
098,0.739561915726273,NA,NA  
"Gm16216",17.26110473926,-1.74503335662574,0.611062282474311,-2.855737  
30644896,0.00429370225181516,0.0176958350498917,-7.04020790122513  
"Gm13777",0.761652270912603,1.49058549271179,2.6793919853116,0.5563148  
2846973,0.57799565192499,NA,NA  
"Gm11196",3.45509863187444,0.055461222739677,0.844567714940269,0.06566  
81776470694,0.947642008265549,0.967641994090688,0.00182429159721899  
"Gm12479",0.0880347728040912,-0.0610759955720126,4.78471990596623,-0.0  
1276480060951,0.989815439251646,NA,NA  
"Gm14445",0.0807735097387688,-0.0706835162585751,4.78471990596623,-0.0  
147727594608908,0.988213472011614,NA,NA  
"Gm13489",0.549705204119483,0.357065008489965,2.73142405573636,0.13072  
4853118314,0.895992971108432,NA,NA  
"Gm12188",0.412379169835456,-1.31915722968751,3.03615290880452,-0.4344  
8313352799,0.663937640147315,NA,NA  
"Gm4994",0.303076396632074,-0.543138110845704,4.78471990594822,-0.1135  
15131820045,0.909622167163576,NA,NA  
"Gm13862",0.091991025955798,0,4.78471990596463,0,1,NA,NA  
"Cyp2j14-

ps", 0.274568794802096, -1.19766409338215, 4.77561146299625, -0.2507875907  
95908, 0.801978336155933, NA, NA  
"Gm15720", 21.4271037308994, 1.45920125824087, 0.508817234941887, 2.867829  
85723259, 0.0041329772690032, 0.0171986715608152, 5.92862254778302  
"Gm11809", 0.157502682527355, -1.19648096621745, 4.77621924155054, -0.2505  
07965758505, 0.802194545266423, NA, NA  
"Gm16149", 0.159565127266309, -0.0554304945280883, 4.78471990596216, -0.01  
15848985139166, 0.990756795092634, NA, NA  
"Gm13577", 6.13947381794767, 1.35035574191236, 1.02784138109159, 1.3137783  
3851975, 0.188920809236722, 0.318123394331744, 1.54658395450179  
"Gm11824", 0.557140688091164, 0.323954452976555, 2.34865934003235, 0.13793  
1647836205, 0.890294438100343, NA, NA  
"Gm14502", 0.891224593173942, 0.0378757987571654, 2.49772297419876, 0.0151  
641311500189, 0.987901237566019, NA, NA  
"Gm15799", 0.623332410208591, 4.09558311836117, 3.24407881517702, 1.262479  
53631721, 0.206776285267841, NA, NA  
"Gm13094", 7.24988716915909, 0.454245172348752, 0.80052995888626, 0.567430  
571843585, 0.570421684078714, 0.69713438612052, 0.163881247029762  
"Gm12788", 0.0983898136351889, -0.544048378937457, 4.78471990596623, -0.11  
3705376621746, 0.90947135024012, NA, NA  
"Gm13002", 0.472558454042084, -2.14667191733552, 3.15247047897992, -0.6809  
49094257701, 0.495903701856894, NA, NA  
"Gm11810", 0.0869125872773591, 0, 4.78471990596623, 0, 1, NA, NA  
"Gm13655", 61.9018358038896, 1.18125345521487, 0.5018873811209, 2.35362254  
491575, 0.0185914786918868, 0.0543066144620838, 3.44112036244825  
"Gm16464", 2.09615323316247, -1.81782981251023, 1.53960058045588, -1.18071  
520340163, 0.237715879773535, 0.375819688950328, -1.77901151345012  
"Gm11578", 0.139896150021884, 0, 4.78471990596454, 0, 1, NA, NA  
"Gm14276", 48.3817390705522, 0.229197479933692, 0.279211991702428, 0.82087  
2622755977, 0.411718826745238, 0.555242335307695, 0.134848479499638  
"Rpl27-  
ps2", 0.37850123993511, 1.5260502269416, 3.68559868614399, 0.4140576218129  
19, 0.678831907690151, NA, NA  
"Gm14877", 0.1081304200825, 0, 4.78471990596623, 0, 1, NA, NA  
"Gm11407", 0.676499047455374, 3.16963104109784, 3.00642531383142, 1.054285  
64166073, 0.291752160453371, NA, NA  
"Gm15994", 0.267041009241157, -0.805857509402453, 4.75788859531257, -0.169  
372925250158, 0.865503318334852, NA, NA  
"Gm12428", 0.321323759591168, -1.00101764037496, 2.74161693383423, -0.3651  
19440291394, 0.715022249952222, NA, NA  
"Gm12403", 6.22354065158352, 0.620034682258373, 0.563077995873099, 1.10115  
239239096, 0.27083033772746, 0.413291410395574, 0.547864096532325  
"Gm13670", 1.19231964587328, 2.04749536456895, 1.28423706221899, 1.5943282  
0061363, 0.110862544554856, NA, NA  
"Gm13641", 0.0948805546934464, 1.33808138336231, 4.78471990596623, 0.27965  
7202440169, 0.779740516107169, NA, NA  
"Gm14719", 1.22409822679317, -0.682356116900659, 1.41124195658585, -0.4835  
14618961194, 0.628730382285467, NA, NA  
"Rpl5-  
ps1", 1.00131478845262, -0.938247054187633, 1.83733774691247, -0.510655733

146668,0.609592142644292,NA,NA  
"Gm13034",0.172644145064741,-0.548626708058275,4.78471990596093,-0.114  
662241226447,0.908712843609013,NA,NA  
"Gm8577",0.0983898136351889,-0.544048378937457,4.78471990596623,-0.113  
705376621746,0.90947135024012,NA,NA  
"Gm4910",0.087583724926668,0,4.78471990595887,0,1,NA,NA  
"Gm7722",0.199952976092686,-0.0516432961894886,4.78471990596594,-0.010  
7933791746296,0.991388296604314,NA,NA  
"Gm12998",0.134424809673886,-0.542562491371447,4.78471990596623,-0.113  
394828126701,0.909717539823535,NA,NA  
"Gm15379",10.921306977095,0.894105715013476,0.559370893499688,1.598413  
01255332,0.109951090545804,0.2116732191412,1.38828832665076  
"Gm15009",25.4644743406035,0.11270638701348,0.438927482082595,0.256776  
783442035,0.797351093420542,0.870527555826963,0.0156274015940113  
"Gm15079",0.455482247332902,-1.66385985127331,4.69648036569229,-0.3542  
78038385465,0.723130524642097,NA,NA  
"Gm715",9.25504606833025,-2.3824976971133,0.752439607451452,-3.1663640  
1582172,0.00154357497832528,0.00822986735777587,-11.4359541172193  
"Nap112",16.4072080306433,-1.63321889163438,0.699483400859987,-2.33489  
299335253,0.0195490114793676,0.0564524031138492,-4.69445483741748  
"Gm6506",0.142381965238495,-0.0659187992568723,4.78471990596623,-0.013  
7769400408738,0.989007939970348,NA,NA  
"Gm16221",0.972557098152778,-0.603037182392571,1.87895878195315,-0.320  
942209155713,0.748254186260097,NA,NA  
"Gng5-ps",0.139896150021884,0,4.78471990596454,0,1,NA,NA  
"Gm8503",0.323562789064908,-2.13211361956419,4.74628105265066,-0.44921  
7734034833,0.653274595753862,NA,NA  
"Gm6292",0.547435741776521,-0.131079879426917,2.36630097887876,-0.0553  
944238695399,0.955824238125989,NA,NA  
"Gm13161",0.2936236749955,-0.544338978408816,3.84056666159104,-0.14173  
4026869699,0.887290096694683,NA,NA  
"Gm14639",0.104600138169097,0,4.78471990596623,0,1,NA,NA  
"Gm7429",0.125151632146135,-0.556070793723328,4.78471990596623,-0.1162  
18045079283,0.907479735754331,NA,NA  
"Gm14730",0.835136411876851,-1.04293152992135,2.16088180723887,-0.4826  
41635663537,0.629350210773771,NA,NA  
"Gm12799",0.428511294105514,-1.37522661657055,4.76939599642552,-0.2883  
43978483068,0.77308344600391,NA,NA  
"Gm15547",2.25818188566709,0.909313239743136,0.972055968785124,0.93545  
3583891467,0.349554593334345,0.49460199280356,0.640158243728895  
"Gm12217",1.24775524724218,1.32446610032542,1.74403509718572,0.7594262  
88188041,0.447597592889219,NA,NA  
"Gm14026",0.95595800598882,-0.874938825880135,1.9136617171153,-0.45720  
663064684,0.647522532902004,NA,NA  
"Gm13885",0.620235443403709,0.851553348589002,2.84103342335719,0.29973  
3660853148,0.764380320746988,NA,NA  
"Gm15807",192.742385023929,0.789237371808106,0.493211643430914,1.60020  
020273235,0.10955417720363,0.21120104282345,1.22722053901209  
"Gm14472",0.909224681097314,2.60834161607964,1.86240640943284,1.400522  
25060478,0.161356985114287,NA,NA

"H3f3a-

ps1",0.217433070689783,0.806450543203896,4.78471990596623,0.1685470746  
57036,0.866152913116813,NA,NA

"Pisd-

ps1",306.468256346699,-0.225024770829617,0.228778279981968,-0.98359324  
5160133,0.325315547710315,0.470200337231707,-0.169802887754644

"Gm12250",126.502098033783,-1.21367941585458,0.477781027541305,-2.5402  
4196419071,0.0110775801491605,0.0367393532485681,-4.00988367848282

"Gm2420",1.53602639214282,-0.498143531805152,1.46854083009066,-0.33920  
9861651854,0.734451640702221,0.826236908055152,-0.0950825154646471

"Gm13418",2.97181895585268,-0.98674190357116,1.13909377367855,-0.86625  
1687413417,0.386352154078445,0.53068646003674,-0.625183786397195

"Gm15770",0.544020145869661,1.32757255156777,4.21792336950984,0.314745  
535958384,0.7529548673565,NA,NA

"Gm12904",0.101444496535411,-0.0694630435407845,4.78471990596623,-0.01  
45176823107594,0.98841697230617,NA,NA

"Gm11701",1.11935400759906,0.322191298185476,1.44889165174771,0.222370  
870725107,0.82402518595175,NA,NA

"Gm16523",13.9691057120794,0.554769052254985,0.567817037535095,0.97702  
0792935781,0.328558858510369,0.473281321417369,0.41500348162343

"Vmn1r221",2.73510089646693,0.0513123437872413,0.975744914459598,0.052  
5878669997065,0.95806028432611,0.974604489440235,0.00131993523768405

"Gm14933",0.338345903851636,-1.10919839271163,3.93106302713597,-0.2821  
62454545979,0.77781894600938,NA,NA

"Gm8822",1.22686125362156,-0.00519362795266049,1.1172089389778,-0.0046  
4875259359495,0.996290845438278,NA,NA

"Gm9164",0.313368134882617,-0.392005959971652,3.18742003170298,-0.1229  
85347419747,0.902118700941711,NA,NA

"Gm14366",0.113058343341289,2.23400583696369,4.75316341366045,0.470004  
004184502,0.638352156775581,NA,NA

"Gm13921",0.396246601805002,2.05756105003334,3.65281919923679,0.563280  
28785636,0.573244038790134,NA,NA

"Ldha-

ps",1.27129499111369,-2.49431506640332,2.10863953323996,-1.18290254312  
494,0.236847773652734,NA,NA

"Gm13384",0.751386542713201,-1.66177477748977,2.22840553095815,-0.7457  
23681979579,0.455834350311276,NA,NA

"Gm13244",4.06129184566963,-0.12035667852233,1.21648791825687,-0.09893  
78330158767,0.921187629853477,0.951510982800244,-0.00598221433044371

"Gm8401",0.113058343341289,2.23400583696369,4.75316341366045,0.4700040  
04184502,0.638352156775581,NA,NA

"Gm5395",4.43177700637475,0.461086417783685,0.804858147244927,0.572879  
108401907,0.566726550914183,0.694010444022405,0.168420237943739

"Gm14404",0.573789658002835,-1.74186126433528,4.75633611923971,-0.3662  
1912763678,0.714201570351805,NA,NA

"Gm13622",0.166193020885911,-0.527288111884026,4.78471990596544,-0.110  
202503437373,0.912248776912828,NA,NA

"Gm12807",0.188239063294059,0,4.7847199059598,0,1,NA,NA

"Gm14008",0.147804841224025,1.3930343276874,4.78471990596623,0.2911422  
93606441,0.770942494623687,NA,NA

"Gm13542",2.94824486571659,1.07176814566778,0.902391370332856,1.18769768960938,0.23495253435384,0.37293263715656,1.05714651989226  
"Gm8814",0.803576525350081,-2.17127110398423,1.9786455978115,-1.09735220212543,0.272487459294621,NA,NA  
"Btc",165.175883037557,0.691944575389982,0.366465208246903,1.88815898431425,0.0590046102584093,0.131844131425449,1.40197303690675  
"Gm11955",0.157863633167365,0,4.78471990595081,0,1,NA,NA  
"Gm11225",0.146602807622313,0.884534098746678,4.78471990596623,0.184866432336765,0.853333800252978,NA,NA  
"Gm12313",0.262504470878925,-2.01337166768009,4.74889217132398,-0.423966600007843,0.671590171850734,NA,NA  
"Gm3712",4.07811136377409,0.806141656988913,0.78533649979708,1.0264920288274,0.304659719017361,0.449372509372911,0.644835204778741  
"Gm14442",0.332955626685671,0.394620059488483,2.68987158656029,0.146705910222692,0.883364153401937,NA,NA  
"Gm14415",5.15582833277617,0.235785339803361,0.820858583073236,0.287242339503349,0.773926769375992,0.85384621452459,0.0372550688185699  
"Gm12218",0.138617592701157,-0.547118720678913,4.78471990596623,-0.114347073900124,0.908962667610887,NA,NA  
"Gm9670",22.1226938710663,0.503772157204347,0.379805389370776,1.3263954943845,0.184708730430226,0.312979128002828,0.585191195809654  
"Gm12692",0.10500178835157,-0.544048378937456,4.78471990596623,-0.113705376621746,0.90947135024012,NA,NA  
"Zfp389",12.6148966166043,-0.418618893629668,0.453047496424863,-0.924006637125506,0.355482860196721,0.500492998798261,-0.289751951980704  
"Gm14036",30.4849404785259,0.986934709186443,0.414575738419173,2.38058964316085,0.0172849548840613,0.0514301923286169,2.9287582387084  
"Fau-ps1",0.20998738240326,-1.06749374810741,4.78074326636038,-0.223290331363078,0.823309551774656,NA,NA  
"Gm13401",0.506617671052912,-0.0149914669601504,2.68233087247705,-0.00558897006852337,0.995540670287254,NA,NA  
"Gm13126",0.2658606371107,-0.539135551042909,3.93944755612582,-0.136855623374033,0.891144916121545,NA,NA  
"Gm11425",49.2238805132028,-1.43489604725827,0.47933155904303,-2.99353551876075,0.00275765408382057,0.0127112858927502,-6.26370153271157  
"Gm6517",1.28666417893382,-0.138872059360197,1.36270196415556,-0.101909341156819,0.918828635397585,NA,NA  
"Gm13292",5.04479819604265,-1.11075607991381,1.54873584850431,-0.717201762318939,0.473249612039275,0.611042922025645,-0.547145197492498  
"Prdx2-ps1",0.0778527997966676,0,4.78471990596551,0,1,NA,NA  
"Gm9025",0.239908723254136,-1.59433161518648,4.76131868740098,-0.334850851173914,0.73773759887957,NA,NA  
"Gm11688",0.877453027894903,-2.3591582634773,2.37067892998205,-0.995140351416192,0.319668007643105,NA,NA  
"Gm12183",1.30276582408165,1.83097441016919,1.51406428976407,1.20931087441109,0.226543434628906,NA,NA  
"Gm13665",0.17798411607672,0,4.78471990595825,0,1,NA,NA  
"Gm13776",0.15829558155706,0,4.78471990596379,0,1,NA,NA  
"Gm11988",0.127190170833851,-0.075954425969193,4.78471990595946,-0.015

8743724736301,0.987334615230177,NA,NA

"Rps6-

ps3",27.390910620058,-0.495833502320551,0.632593465669193,-0.783810660763039,0.433151217470547,0.575233785467969,-0.274185384071297

"Gm12980",0.087583724926668,0,4.78471990595887,0,1,NA,NA

"Gm8213",2.24055732379911,0.414632551405675,1.05483935233363,0.393076491210134,0.694262986792318,0.796138311855356,0.0945289032983085

"Gm7206",0.615619881157801,-1.48416742660987,2.32555838479719,-0.638198308119152,0.523344598411881,NA,NA

"Gm11619",18.4849435195027,2.27438022695852,0.795772905240346,2.85807698651362,0.00426216969588873,0.0176030046029312,9.18778122333175

"Gm11687",4.23146418027628,0.75651510549471,0.800736118675541,0.944774549131149,0.344773987951791,0.489278244552788,0.540775111454555

"Rps12-

ps19",0.155095275986326,0.844560820406314,4.78471990596623,0.1765120711357,0.859891666175625,NA,NA

"Gm13486",1.91534058835693,0.98148752155556,1.13230203438154,0.866807169600864,0.386047673116855,0.530342952894557,0.622490205633909

"Gm15693",0.087583724926668,0,4.78471990595887,0,1,NA,NA

"Gm11628",1.65218102295281,1.19380445568031,1.35426637073404,0.881513771203841,0.378039803665908,0.523134317076405,0.773486234312174

"Gm5909",0.272319656738866,-0.553176667894162,4.01578754381954,-0.1377504815327,0.890437621164399,NA,NA

"Gm13615",0.0721532113593249,-0.544048378937457,4.78471990596623,-0.113705376621746,0.90947135024012,NA,NA

"Gm12229",8.58688781735905,0.373854783532818,0.76030002997393,0.491720069438426,0.622917248533143,0.740676320055275,0.112228052236535

"Gm9378",0.126049042748277,-1.03746213064881,4.78088970847916,-0.217001895862358,0.82820686745958,NA,NA

"Gm11793",0.327945742610498,-0.0532579934861871,3.19623921886749,-0.0166627057110756,0.986705699559139,NA,NA

"Gm13937",0.201903741423594,0.401988345582556,4.78471990596623,0.0840150214605672,0.933044488595854,NA,NA

"Gm15374",0.158739837535227,-0.0614792655986602,4.78471990596584,-0.0128490835005837,0.989748196748847,NA,NA

"Gm11452",0.677806571826897,3.54603021051428,3.24776122203052,1.09183833665496,0.274904165185945,NA,NA

"Gm12902",1.51270452246296,-1.89678870138184,1.70817147384743,-1.11042054642768,0.266817848461174,0.408834138255086,-1.69657456438902

"Vamp7-

ps",1.95831269794205,2.67896659437155,1.476002498513,1.81501494548314,0.0695216127440774,0.149320599833005,5.09448256328589

"Gm13349",8.03888106034637,1.29388168005023,0.793864361916999,1.62985233009554,0.103132710720868,0.20195657262584,2.0698258769227

"Rpl31-

ps6",7.1925154769296,0.883039321564227,0.710926377586585,1.24209671972212,0.214200878708535,0.348883863759002,0.929854693852976

"Gm13712",0.181881813819633,-0.910129032678294,4.78339714679016,-0.190268339581426,0.849098861792589,NA,NA

"Gm7860",2.53440434459833,-0.790142337803904,1.30949129495192,-0.60339



6403511727,0.546245014215366,0.676191053721745,-0.3091665929083  
"Gm13456",4.13275103683737,0.0696985006356633,0.729864673550093,0.0954  
951008885618,0.923921581402945,0.953104226982415,0.00334768966435961  
"Gm9095",0.169246085983818,-0.0695881871068772,4.78471990595306,-0.014  
5438371471435,0.988396105969036,NA,NA  
"Gm14336",0.116304490808944,-0.540716164473093,4.78471990596623,-0.113  
008948297863,0.910023460947597,NA,NA  
"Gm12196",0.119311706836815,1.34539191932235,4.78471990596623,0.281185  
094585106,0.778568436456758,NA,NA  
"Gm12344",0.19901881554581,-0.994085031512421,4.78176033017853,-0.2078  
9101980678,0.835314061149585,NA,NA  
"Gm5387",0.0949500915947116,2.04836625511614,4.7634299069052,0.4300191  
86835683,0.667181684222319,NA,NA  
"Gm15157",3.02215996372695,-1.85323024569219,1.0922110310567,-1.696769  
39070942,0.0897402678382109,0.181660687532126,-3.16089672395491  
"Gm15711",0.361327907176467,0,4.77125242729436,0,1,NA,NA  
"Olfr1268-  
ps1",0.456243817987832,1.3580922326089,3.12666112665073,0.434358626533  
883,0.664028037030451,NA,NA  
"Eef2-  
ps2",0.15719780580529,-0.539813066837438,4.78471990596623,-0.112820202  
111377,0.9101731016314,NA,NA  
"Gm12058",2.66103109833354,0.0441927497593927,1.41005314721087,0.03134  
11943704445,0.974997438174697,0.984521038460692,0.000689407401828556  
"Gm11979",0.0877742361633249,-0.0533227224756219,4.78471990596623,-0.0  
111443770008631,0.991108257706451,NA,NA  
"Gm15387",140.158930296376,0.274029631950665,0.330747056216345,0.82851  
722124299,0.407377646185116,0.551225184893259,0.163215301329996  
"Gm15443",88.2220013471899,-0.571227816843883,0.269970950823325,-2.115  
88622813611,0.0343544850005282,0.087227910295882,-1.39335655725336  
"Gm11331",61.5723360754171,-0.473130709305786,0.330722965066005,-1.430  
59526940126,0.152546244042984,0.271580228848621,-0.616724782416216  
"Gm14227",0.346984061868763,-0.445702634086265,3.20684038374501,-0.138  
984976098425,0.889462021153363,NA,NA  
"Gm9673",0.0810182756847091,0,4.78471990596022,0,1,NA,NA  
"Gm8482",0.558689218064588,0.806020805901646,2.60207960036024,0.309760  
241689017,0.75674328798725,NA,NA  
"Gm15464",0.282419068394613,1.3300792182791,4.78471990595819,0.2779847  
60742801,0.781024057053393,NA,NA  
"Gm13829",0.087583724926668,0,4.78471990595887,0,1,NA,NA  
"Gm13239",0.136785605327573,1.3548439283572,4.78471990596007,0.2831605  
51711616,0.777053766485206,NA,NA  
"Smt3h2-  
ps",0.110504694228196,-0.0583133614855051,4.78471990596623,-0.01218741  
3815549,0.990276091401363,NA,NA  
"Rps13-ps5",0.156678846972464,0,4.78471990595966,0,1,NA,NA  
"Gm5639",0.148177164577155,2.59891947282789,4.7275994170606,0.54973343  
6265582,0.582502219767124,NA,NA  
"Gm15481",7.51032369745877,0.385019800979723,0.818618729187479,0.47032  
8600179811,0.638120267085275,0.752370526252533,0.109548280690697

"Gm11366",0.0867949333026056,1.36959897306587,4.78471990596623,0.28624  
4336133046,0.774690988371737,NA,NA  
"Gm14001",14.4516573290642,0.610125899190742,0.740749280468023,0.82366  
0468229209,0.41013250737352,0.553639132426536,0.360732172807296  
"Fau-  
ps2",1.31904847089127,0.399690918355446,1.70425141572064,0.23452579511  
9517,0.814576809904066,0.881975712989198,0.0501974860606282  
"Gm15516",0.0898336716487984,0,4.78471990596623,0,1,NA,NA  
"Trav13-3",0.129245593242968,-0.0710203076601276,4.78471990596062,-0.0  
148431484090956,0.988157315913768,NA,NA  
"Gm11470",0.276223673765429,1.37708221506417,3.94492187034367,0.349077  
183357297,0.72703136547968,NA,NA  
"Gm11914",0.139247737472274,-0.0578616232098583,4.78471990596623,-0.01  
20930011258775,0.990351416277699,NA,NA  
"Gm11843",6.4067443349071,-0.807928717860669,0.724040574249203,-1.1158  
6110861046,0.264481591430364,0.406425928738124,-0.727421516519564  
"Gm15371",0.113208142637159,-0.0641040868165809,4.78471990596623,-0.01  
33976675910845,0.989310527668183,NA,NA  
"Gm13469",0.229783256629995,-0.0556704282423051,4.78471990595824,-0.01  
16350443362381,0.99071678721167,NA,NA  
"Cyp2j7-  
ps1",0.461590471269106,2.14524209560479,3.63129551998312,0.59076494430  
1409,0.554677926412591,NA,NA  
"Gm12697",0.131245990525548,-0.563974500741073,4.78471990596623,-0.117  
869909174377,0.906170736007201,NA,NA  
"Gm11474",0.470099634997704,-1.48548895068895,3.02455623374135,-0.4911  
42777944454,0.623325467430037,NA,NA  
"Gm12124",1.02840806342561,1.1725822090852,2.01596678916183,0.58164758  
2385383,0.560804085522983,NA,NA  
"Gm14156",0.122497687364811,0,4.78471990596339,0,1,NA,NA  
"Dynlt1-  
ps1",17.4379637485146,-4.93059581075816,4.716691556098,-1.045350486059  
16,0.295861012025988,0.440218027277462,-4.04548068409577  
"H2af-  
ps",0.337547536628258,-0.537054811687758,3.15661381361588,-0.170136368  
716123,0.864902892349005,NA,NA  
"Gm15190",0.129637672256756,0.381240221032376,4.78471990596623,0.07967  
8691443776,0.936492807324677,NA,NA  
"Gm13792",0.157863633167365,0,4.78471990595081,0,1,NA,NA  
"Gm15616",2.62677001778412,-0.741220547432035,1.0947103091898,-0.67709  
2872159591,0.498347031064737,0.633922913080653,-0.337869020499656  
"Gm12362",0.286376690958177,-1.52411421723995,4.76419737564253,-0.3199  
09965324305,0.749036583317483,NA,NA  
"Gm12987",2.03391289008024,1.13416354065816,1.58667612311686,0.7148046  
93997799,0.474729734276565,0.612390364467381,0.556177184131819  
"Gm11633",0.0877685440485567,-0.0696810135755947,4.78471990596623,-0.0  
145632377537308,0.988380628163799,NA,NA  
"Gm12489",0.091991025955798,0,4.78471990596463,0,1,NA,NA  
"Gm14416",69.0048984470426,-0.523256715235357,0.390887250756465,-1.338  
63848008019,0.180688392717025,0.30844530565545,-0.615460169589541

"Gm11424",1.36044222936993,-2.25193522301641,1.80118687915146,-1.25025  
07369348,0.211207967943251,0.34524889189736,-2.39490990633152  
"Gm14845",0.264821288518541,-1.28272573882614,4.77318653171619,-0.2687  
35724091834,0.788133058841965,NA,NA  
"Gm12988",0.109151399420083,0.828701667963925,4.78471990596623,0.17319  
7529688329,0.862496165322031,NA,NA  
"Gm15181",0.0952244391919744,0,4.78471990596623,0,1,NA,NA  
"Rps12-  
ps1",4.86123601952887,0.611697702329234,0.797279387223382,0.7672313020  
15147,0.442944005103644,0.584259383812126,0.328732611705382  
"Gm12366",69.4137239344771,-0.0869192717077497,0.528702099224175,-0.16  
4401222986056,0.869415300869915,0.918103311111439,-0.00742684805840933  
"Gm14411",72.5066793472772,-0.226118031974674,0.243241164622257,-0.929  
604297553108,0.352576001519513,0.497613237613281,-0.15781504081592  
"1700064H15Rik",2.08586940926889,-0.273822537290148,1.26198398508904,-  
0.216977822639191,0.828225628201649,0.890530688358406,-0.0317463592629  
858  
"Gm15793",9.14126705419156,-0.127236352103117,0.58619715915861,-0.2170  
5385315368,0.828166376442117,0.890530688358406,-0.0147514919157192  
"Gm12803",0.0886915477092957,-0.544048378937457,4.78471990596623,-0.11  
3705376621746,0.90947135024012,NA,NA  
"Gm7061",41.8791425853735,-0.215577453571286,0.278586186782734,-0.7738  
26786104843,0.43903322999016,0.581066380555807,-0.117034903356864  
"Gm15191",1.54968337224184,-0.502436817483558,1.38543296249341,-0.3626  
56895775965,0.716861202790446,0.812401030631102,-0.104386866403179  
"Gm4875",0.495982414058971,-0.540021327592466,3.09102676042049,-0.1747  
06131472962,0.861310549658296,NA,NA  
"Gm9308",0.165102468646656,-0.0656213067293069,4.78471990595387,-0.013  
7147645043237,0.989057544184472,NA,NA  
"Gm6806",0.127073262934416,-0.0678492568600034,4.78471990596623,-0.014  
1804030734171,0.988686054498281,NA,NA  
"Gm14554",0.341857019588167,-1.39912968465624,4.76944556336685,-0.2933  
52689755528,0.769252583538196,NA,NA  
"Rpl13-  
ps1",13.4805078670799,0.34700971456419,1.05521752873255,0.328851355398  
722,NA,NA,NA  
"Gm14150",0.822679203637872,-1.63346763353772,1.74551852134959,-0.9358  
06531731766,0.349372807887352,NA,NA  
"Gm14860",0.469334648426981,0.768754334070193,2.9308526528009,0.262297  
162341316,0.793092349586875,NA,NA  
"Gm12956",0.524577629548266,2.52677352172609,3.55935457146491,0.709896  
547532257,0.477768291539206,NA,NA  
"Gm5678",1.08376154460515,0.212409709265399,1.6687498917129,0.12728672  
5422568,0.898713466423647,NA,NA  
"Gm11953",1.98457695854498,2.94647018378445,1.37397969081601,2.1444787  
0189008,0.0319945501665518,0.0825280776752781,7.35031375034169  
"Gm13803",0.14728986473751,0,4.7847199059615,0,1,NA,NA  
"Gm15828",0.206768112091553,-0.265788274280717,4.77573590211786,-0.055  
6538886840142,0.955617534030059,NA,NA  
"Gm15741",0.209844225032826,0,4.78471990595858,0,1,NA,NA

"Gm16106",0.348455440057185,-1.10156137905568,3.88158084759504,-0.2837  
9194516538,0.776569827687053,NA,NA  
"Gm13612",0.210550563275788,-1.4099538418912,4.76824366417734,-0.29569  
6684396361,0.76746172948991,NA,NA  
"Gm15373",0.127617942788231,1.34819547593071,4.78471990596623,0.281771  
034130879,0.778119082767684,NA,NA  
"Gm12021",0.818173643927048,-0.950610751769414,1.82881633329917,-0.519  
795637462687,0.603206020289811,NA,NA  
"Gm14537",9.57294959146896,-0.442768961750613,0.898595290406088,-0.492  
734567471992,0.622200149488038,0.740231772208052,-0.133181333265905  
"Gm13204",0.123704538891851,-0.0602841505491193,4.78471990596054,-0.01  
25993060688925,0.989947474172041,NA,NA  
"Gm14745",0.176070670659706,1.3732405160467,4.78471990596385,0.2870054  
13699357,0.774108175013278,NA,NA  
"Gm15730",0.288540861350169,0.332548071200452,3.23487907368414,0.10280  
0773576281,0.918121091294062,NA,NA  
"Gm13263",0.182935217827788,-0.0641251163117533,4.78471990596154,-0.01  
34020627271946,0.989307021171759,NA,NA  
"Gm11889",0.262768062315523,2.12199898215968,4.72750936046739,0.448861  
93138069,0.653531259408855,NA,NA  
"Gm13525",0.333998163055864,-0.832000997531167,4.78284983490862,-0.173  
955074118914,0.861900769490297,NA,NA  
"Olfr1186",1.63224562288472,0.13415760189342,1.32164990215578,0.101507  
669825868,0.919147469368573,0.95054298068041,0.00680472834056524  
"Gm13339",0.268179988084879,2.81316561259539,4.71505656301309,0.596634  
541918979,0.550751404172667,NA,NA  
"Gm12934",4.36239051455919,0.968120700163833,0.759436255263207,1.27478  
862571329,0.202384067685026,0.334420751911989,1.06043618115187  
"Gm6480",100.169672527472,0.467501669462304,0.184070813988819,2.539792  
48166252,0.0110918259463704,0.0367702351085434,1.54418914501016  
"Rpsa-  
ps9",4.70226871368945,0.702545154788535,0.734581263326171,0.9563886119  
38484,0.338875936052756,0.483456720652421,0.510605238402325  
"Gm5844",4.44023331266439,1.44987285859111,1.04205028595511,1.39136553  
977546,0.164114608775917,0.286704295485426,1.81133185109779  
"Gm11557",0.560385841996882,1.77397299623487,3.0719532153382,0.5774739  
62616832,0.563619322748891,NA,NA  
"Gm14323",0.571905833865485,1.5909504027837,3.02987366681971,0.5250880  
32615444,0.599521995023951,NA,NA  
"Ccl19-  
ps1",39.7972553620738,-0.615301059010546,0.718519134923816,-0.85634610  
0060071,0.391806368928536,0.536326915288444,-0.383339566351749  
"Gm13736",3.49740375054711,0,4.78471990594791,0,NA,NA,NA  
"Gm14119",1.00549350617704,0.898610361029945,2.38303407893901,0.377086  
659805565,0.706109204633189,NA,NA  
"Gm8770",0.753809639370135,-0.535325883342736,2.32762455156316,-0.2299  
88072167063,0.818101038336816,NA,NA  
"Gm11440",0.585961157562187,0,2.60223678652126,0,1,NA,NA  
"Gm13864",55.5921963575118,0.487345308107282,0.352956054344036,1.38075  
350205568,0.167354764730054,0.290853302674623,0.601840388925221

"Gm6939",5.04509615002357,0.734960236373894,0.634918647905352,1.157565  
99494847,0.24704119301449,0.386331552685462,0.698990792494698  
"Gm11462",4.43292157826252,1.23434305926969,1.04795228395818,1.1778618  
9139023,0.238851669802666,0.37694292657324,1.20430099009939  
"Gm13135",0.842904756887835,-2.54922144052089,2.82323765106647,-0.9029  
42562967706,0.366556379465969,NA,NA  
"Gm8172",4.15930604301158,-1.28075939533842,0.96372394250147,-1.328969  
15688744,0.183858145776644,0.312053109884488,-1.49154918659022  
"Gm12785",0.160607951939866,-0.066458390006181,4.78471990596623,-0.013  
8897137789219,0.9889179681549,NA,NA  
"Gm13586",0.147888995901559,1.28684844093746,4.78471990596623,0.268949  
58664829,0.787968477651411,NA,NA  
"Cyp2j8",24.4148339063117,2.32291893362471,0.52393509988138,4.43360052  
447454,9.26722674510542e-06,0.000161044908267438,20.2879727947784  
"Gm13887",0.623147531672017,3.00303561345651,2.12262592483061,1.414773  
83194411,0.157134818884541,NA,NA  
"Gm7658",0.397396324333171,0.414494595660684,3.14266696873257,0.131892  
624889824,0.895069222152294,NA,NA  
"Gm16166",2.71567021481533,-1.49273791588267,1.15995810173138,-1.28688  
951234926,0.198132801260764,0.329202672260962,-1.65855377044541  
"Gm2810",1.93510617901222,0.0260055372389357,1.51993895639125,0.017109  
5932041112,0.986349185763156,0.991182975731778,0.000230308268366177  
"Gm12850",0.55748454495379,1.11430654279903,2.22063715202626,0.5017958  
66011817,0.615811121381843,NA,NA  
"Gm11540",0.256518167333674,-1.00405963733981,4.781493468511,-0.209988  
70832976,0.833676486010755,NA,NA  
"Gm13217",0.632684405116942,-1.61603299765679,4.35203982242162,-0.3713  
27713806987,0.710393458547658,NA,NA  
"Naip3",2.80067893045102,-2.34551270847908,1.2610929001307,-1.85990477  
643319,0.0628989994597995,0.138342322782535,-4.63948058345027  
"Gm10601",1.83617668629644,0.44303258818803,1.8759546598975,0.23616380  
3773507,0.813305565555088,0.881137518319337,0.0560620400629513  
"Gm16082",1.05369862114996,1.17736173644201,1.62514170067282,0.7244671  
25515622,0.468779002634779,NA,NA  
"Gm12630",3.62662083727567,0.468212642511018,0.805903706925548,0.58097  
8395417994,0.561255014448268,0.689516725650283,0.174064756714954  
"Gm15056",2.05074287231743,-3.23658955808164,2.27633219765151,-1.42184  
412337568,0.155071507261007,0.275046324804431,-4.17784075089014  
"Rpsa-  
ps11",0.15234168564631,-0.0517425633659806,4.78471990596361,-0.0108141  
258804908,0.991371744094061,NA,NA  
"Olfr1274",0.109739176510518,-0.0630684187637729,4.78471990596623,-0.0  
131812143664106,0.989483217104,NA,NA  
"Polr2k-  
ps",1.31654771932018,2.19334782596139,1.60095733507507,1.3700226595098  
8,0.170679828374918,NA,NA  
"Gm14042",0.239299676887515,2.47161398570487,4.70748188996228,0.525039  
510183792,0.599555725064949,NA,NA  
"Gm13557",0.331177777477332,1.35810935403618,4.78471990595671,0.283843  
021269733,0.776530683605867,NA,NA

"Gm14052",0.448485481350082,-0.0574102677468006,3.07637528507279,-0.0186616593968125,0.985111014293572,NA,NA  
"Gm6238",0.343923222075373,-1.07103547693079,3.87276718950442,-0.27655560598463,0.782121356796408,NA,NA  
"Gm13413",0.799704607394198,-1.9939686515502,2.33272304918013,-0.85478156193939,0.392672087442768,NA,NA  
"Gm13623",0.365942758752766,0,4.78471990594136,0,1,NA,NA  
"Gm12053",0.312275944407216,1.38275914972982,3.80687875859574,0.363226474341381,0.716435712541655,NA,NA  
"Gm1335",3.22551666702871,0.378772811298833,0.916674039517783,0.413203379794726,0.679457612101888,0.784280400234585,0.0920375013519512  
"Gm12816",0.309297132036839,0.395174089574814,3.86913619803003,0.102134964847197,0.918649548184692,NA,NA  
"Fam220a",55.6856360691552,0.0151829752096898,0.547351252220995,0.0277389978520769,0.977870319872517,0.985961086817372,0.000214662837943761  
"Gm12978",9.31296727973355,0.518445854521798,0.718064724406331,0.722004349887023,0.47029180314991,0.608234914952039,0.257768219188753  
"Gm11764",0.844424332276473,0.396642562884903,1.9640374094647,0.201952651702804,0.839953739885956,NA,NA  
"Gm16518",0.0983898136351888,-0.544048378937457,4.78471990596623,-0.113705376621746,0.90947135024012,NA,NA  
"Gm12618",1.02106715820236,-0.418784102940894,1.71204978703506,-0.244609769010367,0.806758599243059,NA,NA  
"Gm12163",0.708711731205731,-2.58567072928482,1.781543028663,-1.45136585964208,0.146678011092385,NA,NA  
"Gm13555",0.451638513564219,0.824191246499795,3.68458160004864,0.223686522911832,0.823001233408371,NA,NA  
"Gm6222",7.79469092972014,0.92935599121787,1.07099192754136,0.867752564065876,0.385529803389981,0.529967576600244,0.590084782413673  
"Gm15331",0.397457763466965,-1.64324018245981,4.67609006125423,-0.351413287796911,0.725278315076518,NA,NA  
"Rps15a-ps6",7.54360024026808,0.858451557460637,0.848832426460869,1.01133219078337,0.311857463899966,0.456981574561968,0.672263893890819  
"Gm13140",0.68767616600141,0.394104535777476,2.79483809745002,0.141011579932681,0.887860794290583,NA,NA  
"Gm9083",0.145677530593902,1.33689467847087,4.78471990596623,0.279409182720152,0.779930824809219,NA,NA  
"Gm13233",16.6988085896821,2.90303913248598,2.0919567342935,1.38771470981995,0.165223934984702,0.287971420785887,3.61397610565212  
"Gmfg-ps",0.0952355354515652,-0.0467962316186178,4.78471990596623,-0.00978034922384192,0.99219653476228,NA,NA  
"Gm12416",4.97069443347532,1.41532177314328,0.698456673738365,2.02635585908003,0.0427283308706091,0.103083023424293,3.21592323587997  
"Gm16100",0.443335064507377,3.80456808734107,4.39528357349474,0.86560241761967,0.386708229351617,NA,NA  
"Gm14822",48.7769304564042,2.30346350224499,1.66866942842063,1.380419310747,0.167457577837401,0.290992926624423,2.84352507648189  
"Gm14140",0.126424926517484,0.892972098283783,4.78471990596623,0.18662

9962847001,0.851950772531011,NA,NA  
"Gm12191",47.728009340862,0.633678055993867,0.635469016074618,0.997181  
672063551,0.318676335532575,0.463732456915751,0.486948314466568  
"Gm7785",18.0467952304885,-0.124915846597539,0.414302954632754,-0.3015  
08461865224,0.763026798417571,0.846396995439143,-0.0208318119711283  
"Gm13195",5.97300599200768,1.77317581288891,0.778439639747579,2.277859  
09446221,0.0227349741145363,0.0635171980635089,4.88766084837547  
"Gm11800",2.20408349702102,1.56502894892352,1.15432919157615,1.3557908  
4401963,0.175165725318561,0.301392632568064,1.87700406874072  
"Gm13350",1.08368104865201,0.325686279416021,1.40857450946011,0.231216  
93401995,0.817146274968701,NA,NA  
"Gm11980",1.67148391959442,-1.40659908178153,1.53572781823183,-0.91591  
6912543154,0.359710475521258,0.504832278968796,-0.961451299955796  
"Gm14126",0.669996845872503,-0.476959570673224,2.04605054158902,-0.233  
112311244669,0.815674195241064,NA,NA  
"Gm15382",43.4904970788563,0.370360781527348,0.32912911219349,1.125275  
06017036,0.260472494654619,0.401890694055215,0.33761167855706  
"Gm14667",12.3318270811624,0.639736210670202,0.52822948946992,1.211095  
22172301,0.225858912497812,0.361916261989015,0.650191044923605  
"Gm11249",3.60133489248798,-0.327019193612426,0.879095698135258,-0.371  
994987924638,0.709896581063985,0.807515510877057,-0.0699144195462182  
"Gm11736",0.27997571763301,-1.19848398935303,4.77616680373937,-0.25093  
0094906801,0.801868156263616,NA,NA  
"Gm14494",4.22487871746791,0.105033679043843,1.0432593569369,0.1006783  
96359877,0.919805761428948,0.950820312604264,0.00529686734298281  
"Gm6044",1.39109565384802,2.07478462726511,1.36979204930642,1.51467124  
394222,0.129855680182141,0.239902032612412,2.96180617069409  
"Gm12917",25.313217645632,-0.103722794367376,0.430010676949221,-0.2412  
09811587131,0.809392506835147,0.878264516571412,-0.0134639923770849  
"Gm5303",0.210310257294164,-0.0536293754074091,4.78471990596352,-0.011  
208467049569,0.991057124439786,NA,NA  
"Gm14421",155.26169072242,-0.554631516272799,0.343394739856821,-1.6151  
427261351,0.106279790163384,0.206213886815172,-0.875675179296601  
"Gm13410",0.0991051158695402,-0.0656266771124181,4.78471990596623,-0.0  
137158869071073,0.989056648720846,NA,NA  
"Gm11609",0.108229817038987,-0.909962624367568,4.78339755770097,-0.190  
233534509919,0.849126134161093,NA,NA  
"Gm15854",0.405417489967213,-2.02317411498599,2.26337215636981,-0.8938  
76028867883,0.371388224640742,NA,NA  
"Gm6341",0.961145630171778,1.01673949534476,1.81076525519383,0.5614971  
30800603,0.574458685725876,NA,NA  
"Gm12723",0.21000357670314,-1.68827967326331,4.75824391397549,-0.35481  
1502685823,0.722730810441824,NA,NA  
"Gm12418",5.796778773445,-1.36704089901613,0.769776856913847,-1.775892  
43783816,0.0757506476240564,0.159381259023832,-2.51051058637454  
"Gm5073",4.2435331489119,-1.77076640254469,1.21137379035395,-1.4617836  
5145847,0.143800505496992,0.259513208188853,-2.38867122887573  
"Gm11380",0.193332721523886,0,4.78471990596133,0,1,NA,NA  
"Apc-  
ps1",2.43606950957033,-0.444093281835347,1.46545587116941,-0.303041047

207357,0.761858580289715,0.845692203680511,-0.0744299501078332  
"Gm12459",0.400725822168657,1.01557070836263,3.1158025247495,0.3259419  
36401853,0.744468286076938,NA,NA  
"Gm13511",0.324572375918086,-0.904089643751506,3.20124122163223,-0.282  
41846869963,0.777622655172088,NA,NA  
"Gm15967",1.42043449513441,3.18434083571736,1.50239634678481,2.1195078  
3994648,0.0340475719007411,0.0866770540436938,7.78751596513335  
"Gm11427",678.209252436634,-0.725354328632325,0.415581690960622,-1.745  
39529630302,0.0809160838833769,0.167733553429522,-1.29503205955196  
"Gm11344",0.079975362203259,-0.0600617233481236,4.78471990596623,-0.01  
25528190841914,0.989984562486398,NA,NA  
"Gm8648",0.387187301401167,1.03203618866867,3.73133731430891,0.2765861  
41036089,0.782097907554293,NA,NA  
"Gm14405",0.64210881543416,-3.31573477003166,4.7268043697196,-0.701474  
931197196,0.483006673979574,NA,NA  
"D11Bhm181e",0.506247658263534,1.75799543083841,2.64034847086639,0.665  
819474298994,0.505526495734801,NA,NA  
"Gm12187",0.239416085754772,-1.90044868638697,4.75193352439454,-0.3999  
31665001377,0.68920684894626,NA,NA  
"Gm12693",8.4779878809779,-3.54266711198695,2.8938663980295,-1.2241985  
7198633,NA,NA,NA  
"Gm15007",0.0721532113593249,-0.544048378937457,4.78471990596623,-0.11  
3705376621746,0.90947135024012,NA,NA  
"Gm13828",0.543016739237506,0.367292553447581,3.12676939026488,0.11746  
710665364,0.906489908638601,NA,NA  
"Gm15575",0.0845225592669447,-0.544048378937457,4.78471990596623,-0.11  
3705376621746,0.90947135024012,NA,NA  
"Gm11805",0.239637259951864,1.57025384351372,4.73064768569977,0.331932  
104827935,0.739940527317923,NA,NA  
"4930595D18Rik",0.100200954730384,0,4.78471990596623,0,1,NA,NA  
"Gm13567",17.3188017668248,1.34913875031337,0.71104448926404,1.8974041  
2967659,0.0577746210179428,0.129929591765611,2.75327187288589  
"Gm9432",0.502839782683398,2.9571770045097,2.99743434649425,0.98656939  
9916422,0.323853777538895,NA,NA  
"Gm15066",0.198286244141763,-0.54373941213266,4.78471990596623,-0.1136  
40802976712,0.909522540752892,NA,NA  
"Gm12080",3.31472463169765,-0.22108381704264,0.991195493376833,-0.2230  
47641479326,0.823498427805148,0.886809474502639,-0.02655771947182  
"Gm11338",0.123614986811833,1.36307735570112,4.78471990596623,0.284881  
326909325,0.775735062437121,NA,NA  
"Gm14780",0.121821870984685,0,4.78471990596557,0,1,NA,NA  
"Gm11969",5.35201388943769,-0.0280744399068998,0.606960727951117,-0.04  
6254129161979,0.963107699774997,0.978046740493088,-0.00062319131239288  
9  
"Gm14875",0.127072482277892,-0.548176005964452,4.78471990596623,-0.114  
568045097251,0.908787509204795,NA,NA  
"Gm16425",0.515021566451296,0.437849158505752,3.15711769297963,0.13868  
6359231834,0.889697997681135,NA,NA  
"Gm11410",0.114810471722162,0,4.78471990596601,0,1,NA,NA  
"Gm12919",0.304601599975041,-0.111849810057567,4.73641801831009,-0.023



6148519039444,0.981159825348966,NA,NA  
"Gm15016",0.902916594444048,-2.79204465153146,1.67333636697392,-1.6685  
4955562857,0.0952066831278934,NA,NA  
"Gm7831",1.99512406120871,-0.35561354016958,1.09779829838503,-0.323933  
404426589,0.745988453304359,0.834806879332208,-0.0642077540682328  
"Gm14158",0.324776427500882,0,3.16682073389581,0,1,NA,NA  
"Gm7222",4.81380671407916,-0.533016281441581,0.673907738056096,-0.7909  
33612038764,0.428982732939691,0.571644705225403,-0.298082759481476  
"Gm11698",0.8337094890899,-1.56123656079026,1.90859940978767,-0.818001  
175513279,0.41335651604881,NA,NA  
"Gm13453",0.229206040763528,-1.03294678223556,4.09638249990122,-0.2521  
60725288829,0.800916834008494,NA,NA  
"Gm13259",6.98580725438955,0.0042859846247467,0.711887699918685,0.0060  
2059092359127,0.995196292475584,0.996930467424169,1.31762021775324e-05  
"Gm11185",0.438742679226431,-0.0602436484399148,3.13982610675164,-0.01  
91869378722508,0.984691977754018,NA,NA  
"Gm11839",109.747201840857,-0.467262032032887,0.241445838925847,-1.935  
26645193663,0.0529576068920872,0.121451574930956,-0.985100345621992  
"Gm5403",0.513250089442887,0.854022031493743,2.05048214247992,0.416498  
156117011,0.677045516353591,NA,NA  
"Gm7816",2.8104078283663,-0.501959667382797,1.0862444004921,-0.4621056  
4321933,0.644005563527844,0.757096549962594,-0.139677551243588  
"Gm14874",0.289884490570098,2.02720341704491,4.76383836314672,0.425539  
924428892,0.670443123785701,NA,NA  
"Gm11511",4.34444369301812,-0.118823777719423,1.12287895050936,-0.1058  
20647600102,0.915724654354096,0.948401052768082,-0.0062950240833233  
"Zcchc9-  
ps",2.95447772305754,0.662974312031959,0.978986179926263,0.67720497554  
1017,0.498275911333761,0.633875032882832,0.302252278099744  
"Ctsf",2180.11875077653,0.53707026962103,0.176290635521197,3.046504813  
10706,0.00231518772526509,0.0111819495336187,2.41330079275935  
"Gm13688",15.2687592193782,0.519771356761279,0.373974558946056,1.38985  
7529951,0.164572144322357,0.28717989854746,0.648490880479772  
"Gm15815",0.12798354833985,-0.0643592976229232,4.78471990596075,-0.013  
4510063050389,0.989267973366418,NA,NA  
"Gm13502",0.121476062291212,0,4.7847199059656,0,1,NA,NA  
"Mup-  
ps28",0.347788399101177,-0.989503752599269,3.86609025939936,-0.2559442  
96746191,0.797993849624222,NA,NA  
"Gm14957",0.678678810690728,2.01750560405094,3.27462375676978,0.616103  
025539976,0.537826525361659,NA,NA  
"Gm12309",0.283308534952408,-0.555610739173621,4.78471990595998,-0.116  
121894299714,0.907555937052273,NA,NA  
"Gm13315",0.282991139186187,-0.546509172632761,4.78471990596025,-0.114  
219679181635,0.909063652267216,NA,NA  
"Gm13868",77.1848958880575,0.545740226130923,0.55219837205732,0.988304  
663227571,0.323003462305304,0.468073440522315,0.414287816710097  
"AA414768",90.7734856440425,-0.843928919905258,0.363787215743265,-2.31  
98421587768,0.020349417511214,0.0582376255149935,-2.39947866113707  
"Gm5643",1.16438825009159,0.310206120443156,2.11245647735917,0.1468461

59325825,0.883253449709559,NA,NA  
"Gm15185",1.11779259095006,-1.07333536504862,1.90833989352576,-0.56244  
4546010919,0.573813175885134,NA,NA  
"Vcp-  
rs",49.5121840948328,-0.136916541770254,0.413020756761893,-0.331500389  
577723,0.740266546765261,0.830717532594478,-0.025393288655123  
"Gm11826",7.04982202241068,1.198857548637,1.04312094991174,1.149298697  
08632,0.250432835169982,0.390166953267623,1.12834140239327  
"Gm14220",0.321345964881454,-0.988669073158156,3.91729316588702,-0.252  
385775404248,0.800742893930326,NA,NA  
"Gm12400",0.0949500915947116,2.04836625511614,4.7634299069052,0.430019  
186835683,0.667181684222319,NA,NA  
"Gm7599",8.41309315725249,0.7809978120094,0.624863106703493,1.24987025  
739062,0.21134694591486,0.345302727622587,0.830461351971476  
"Gm13397",0.111644319771445,-0.933284986714223,4.78299436282993,-0.195  
125671476232,0.845294565896608,NA,NA  
"Gm11539",0.286507613293219,-0.539933414899784,4.78471990595306,-0.112  
845354694223,0.910153160118818,NA,NA  
"Gm11693",1.36256221190046,-0.0743958517694159,1.42496301844612,-0.052  
2089702022879,0.958362185495437,0.974708981940954,-0.00190574888290302  
"Gm13156",5.89891626800538,0.684780463521925,0.922004897613716,0.74270  
8054256802,0.457658452395947,0.597444061650789,0.352726732796897  
"Gm14238",0.246712545893904,-0.546830374688923,4.78471990596207,-0.114  
286809977641,0.909010438101126,NA,NA  
"Gm14237",0.202495291978539,2.35637737332633,4.74020479219422,0.497104  
550673974,0.619115325730948,NA,NA  
"Gm7363",0.346562064440452,1.56399095077147,3.83475333576453,0.4078465  
58521778,0.683386329579832,NA,NA  
"Gm12540",3.40019888070689,0.611413599806926,0.968115019649319,0.63155  
0577562983,0.527680589877086,0.660167862779816,0.253896307705997  
"Gm11581",1.15659172853279,-2.73935856544209,1.95010969296416,-1.40472  
024487929,0.160104483261931,NA,NA  
"Gm8606",0.230262150928052,-0.0727980051447045,4.78471990596172,-0.015  
2146847831153,0.987860906255533,NA,NA  
"Llph-  
ps2",644.903788332422,0.279465918402307,0.239473574732119,1.1670010718  
9248,0.24320993666943,0.382018369119126,0.268926304196409  
"Gm12895",0.0824544976492807,-0.549913775772746,4.78471990596623,-0.11  
4931236640841,0.908499625883032,NA,NA  
"Gm8806",0.224725280583358,1.06846423976784,4.76380377327917,0.2242880  
45985648,0.822533177207342,NA,NA  
"Gm13392",1.26286949365222,0.906259274724108,2.17766203715894,0.416161  
580291148,0.677291771166449,NA,NA  
"Gm11449",0.189679463825625,1.36773971025687,4.7847199059643,0.2858557  
52716464,0.774988604408619,NA,NA  
"Gm13196",0.345410120510583,-2.03300134687124,3.80494828614933,-0.5343  
04593382181,0.593130814746821,NA,NA  
"Ndufb4c",4515.51448901272,0.88438812575585,0.289837760730875,3.051321  
27548086,0.00227836643268799,0.0110469905977565,3.9846966916007  
"Gm6433",2.0397272258042,0.253306728730313,1.10104930914411,0.23005938

6647468,0.818045623210917,0.883298155181371,0.0314334585947746  
"Gm14148",0.174079187293888,-0.0653974817798611,4.78471990596559,-0.01  
36679853920652,0.989094865017778,NA,NA  
"Gm6335",0.363535361566731,0.880032707673964,4.66159798411263,0.188783  
483833921,0.850262517068805,NA,NA  
"Gm11703",2.66225963169885,-0.0634033290315128,0.929049734891014,-0.06  
82453550658949,0.945590322984138,0.966485527048076,-0.0021613532331810  
6  
"Gm15542",128.702127746146,0.412776311038229,0.352293379478322,1.17168  
341809168,0.241324182842948,0.379830393693235,0.399580041543066  
"Gm5466",29.0758661763225,-0.0412668603597474,0.349182921821655,-0.118  
181210422497,0.905924077525716,0.94269979257559,-0.00243505016126007  
"Gm13019",0.0985499052437135,0,4.78471990596623,0,1,NA,NA  
"Gm14300",1.78920773324455,-0.50274122284036,1.58321254861208,-0.31754  
4996267929,0.750830102605533,0.83797794569066,-0.0888662964533  
"Gm12268",1.19305175793133,0.976659804959916,1.73534697118318,0.562803  
76269307,0.573568517852096,NA,NA  
"Gm15378",0.274312915359214,-0.557951868285683,4.78471990596557,-0.116  
611187122998,0.907168172169974,NA,NA  
"Gm14776",5.7338348713177,-0.755317408842118,0.915254951030059,-0.8252  
53562400354,0.409227649982594,0.552811777569486,-0.447705104786984  
"Gm13992",0.0921191373971165,-0.0631812258841596,4.78471990596623,-0.0  
132047909022588,0.989464407387087,NA,NA  
"Gm13006",0.47571245640952,-0.825942416181393,3.24164951808902,-0.2547  
90782153493,0.79888469514382,NA,NA  
"Gm14878",0.14728986473751,0,4.7847199059615,0,1,NA,NA  
"Gm15824",0.313958663819585,0.4228611274941,3.21935512666367,0.1313496  
37072293,0.895498727184772,NA,NA  
"Gm11471",0.67685997995251,1.5616894833191,2.26120227554915,0.69064563  
5822132,0.489788261118536,NA,NA  
"Rpl7a-  
ps12",0.64716197941458,2.06445695089436,3.04572641124825,0.67782087822  
1386,0.497885271606957,NA,NA  
"Gm15519",2.21444524269411,-4.85866729163412,2.7924929201692,-1.739903  
17273203,0.0818760214972333,0.169237640957602,-8.63118627476661  
"Gm13487",0.1338741488466,0,4.78471990596623,0,1,NA,NA  
"Gm13226",0.1363289230534,-0.0707947773478269,4.78471990596623,-0.0147  
960128783193,0.98819492049645,NA,NA  
"Cyp4b1-  
ps2",0.322964745617201,0.40900553301907,3.893244536087,0.1050551870626  
01,0.916332018005872,NA,NA  
"Gm5510",0.20078184031027,0.410852445928438,4.78471990596623,0.0858676  
064645147,0.931571662668093,NA,NA  
"Gm12501",2.16542276588587,0.792524894174572,0.938722921640388,0.84425  
8594207607,0.398524918309378,0.542867877807112,0.484144983866513  
"Gm11652",7.98955660589343,2.29311855127284,0.539963048564084,4.246806  
43864594,2.16839135695606e-05,0.000305847723026659,18.5568858037504  
"Gm9431",0.224258150256319,0,4.78471990596395,0,1,NA,NA  
"Gm13207",1.11501802902108,2.14080649270974,1.7046993724443,1.25582640  
981449,0.209178914178546,NA,NA

"Gm5555",0.376389893550332,-1.74693265269082,4.75662445459306,-0.36726  
3102094167,0.71342277415707,NA,NA  
"Gm14044",0.667302440971713,-0.283438773879778,2.15291126641694,-0.131  
653718525753,0.895258194038481,NA,NA  
"Gm12308",0.147660689572092,-0.530496794303523,4.78471990596623,-0.110  
873113730655,0.911716966260901,NA,NA  
"Gm11784",4.90435921278827,-1.46650802592903,0.904895397639753,-1.6206  
3817514614,0.105095259981693,0.204689579374993,-2.32626403959086  
"Gm13877",0.374952622855139,-0.129195618545806,4.70470593599448,-0.027  
4609338614267,0.978092098349992,NA,NA  
"Gm11263",1.89706967514003,1.64617002024878,1.11661133203689,1.4742551  
6204093,0.140412902694095,0.254889747391255,2.25018962233939  
"Gm15470",0.331543477579665,-0.0628420638491778,3.89665055008547,-0.01  
61272002817392,0.987132913648075,NA,NA  
"Gm14861",6.32904547255003,1.00352958689792,0.927945067628525,1.081453  
65701717,0.27949536463046,0.423237078251375,0.862857607508369  
"Gm7541",7.53483453495259,-0.754545372801022,0.858824107042928,-0.8785  
7963768512,0.379629240325877,0.524429257054929,-0.487017339825497  
"Gm12842",0.229677443976327,-0.911715552150092,4.78339365322723,-0.190  
600150906456,0.84883887195311,NA,NA  
"Gm9429",3.86634718000289,-1.9404637654134,1.12735167154334,-1.7212586  
0491865,0.0852039074999578,0.174580263601742,-3.38682856128264  
"Gm13432",2.30546141741978,-1.41819385770755,1.07477017133495,-1.31953  
220840326,0.186991249702269,0.315803844668241,-1.63465846303773  
"H2-M6-  
ps",3.58764594872641,-0.520227022456348,1.1234431195623,-0.46306485250  
3641,0.643317882337546,0.756356251194976,-0.145269641052474  
"Gm15808",0.091991025955798,0,4.78471990596463,0,1,NA,NA  
"Gm16016",0.40129860894927,-1.44485746987495,4.76663925383746,-0.30311  
8694940411,0.761799407470725,NA,NA  
"Oat-rs1",0.206281766889864,0,4.78471990595673,0,1,NA,NA  
"Gm13321",12.7502581927039,-0.334165134251059,0.5408691186637,-0.61782  
9938371533,0.536687446323728,0.668220423270756,-0.134714391520062  
"Gm11989",0.239428351803808,-0.0615482557207798,4.78471990596444,-0.01  
28635023429598,0.989736693127854,NA,NA  
"Gm6877",0.442606082248744,2.02580218352928,4.58325890037847,0.4420003  
81728817,0.658488929696192,NA,NA  
"Gm12896",0.0824544976492807,-0.549913775772746,4.78471990596623,-0.11  
4931236640841,0.908499625883032,NA,NA  
"Gm14939",0.128632411549176,0,4.78471990596515,0,1,NA,NA  
"Gm13340",22.5614931939155,1.19043583845392,0.58320931028983,2.0411811  
2905695,0.0412328267121355,0.100144202196465,2.73936441768714  
"Gm11451",0.274971951019114,3.50370570721384,4.6857713407055,0.7477329  
66988166,0.454621241998461,NA,NA  
"Gm13666",0.0934664748768423,1.3657101059803,4.78471990596623,0.285431  
568162923,0.775313525097524,NA,NA  
"Gm7312",0.475936486772788,-2.06264305008726,4.64684836261683,-0.44387  
9999760891,0.657129345242216,NA,NA  
"Gm15538",19.5418724787956,0.0902399007706339,0.42241415881977,0.21362  
8967889631,0.830836407731835,0.89210024109011,0.0103033008293766

"Gm13722",4784.70522934677,0.422199042776409,0.309118257731068,1.36581723084025,0.171996336711358,0.297224547832851,0.512240323315916  
"Rpl21-  
ps15",5.96781545013859,1.44599647270202,0.90026569634132,1.6061885714168,0.108232483652678,0.209190817432584,2.26227368789323  
"Gm14810",5.03959895831153,-0.598485343977676,0.65645904955423,-0.911687247489511,0.361933378989735,0.506711928164131,-0.406857893250269  
"Gm14863",0.836537738418419,-0.435262638064129,2.76382962898079,-0.15748533610758,0.874862363779082,NA,NA  
"Gm11771",0.127893479106977,-0.0565025322925124,4.78471990596549,-0.0118089529592038,0.99057803773937,NA,NA  
"Gm14414",1.46850720090852,0.804237720822316,1.85501618085553,0.433547550216734,0.664617029345356,0.772651756259624,0.207434494962801  
"Gm14586",3.43828432756371,0.0731144512727767,0.880688393977366,0.0830196602711853,0.933835906940711,0.958753743692193,0.00307965537728221  
"Gm4459",3.96419541818069,-1.46016994835238,2.01268533377077,-0.725483474168687,0.468155479564314,0.606356818157632,-0.730503542626699  
"Gm13312",0.848451237307867,-1.06527205067012,1.74372925617803,-0.610915970409895,0.541255211439223,NA,NA  
"Gm15175",0.310448347573716,1.41209064579096,4.78471990595762,0.295125038360703,0.76789836327679,NA,NA  
"Gm13148",0.269396302043323,0,4.78471990594893,0,1,NA,NA  
"Gm6088",0.243390247303071,-0.545958832392802,4.78471990596541,-0.114104658814431,0.909154829148038,NA,NA  
"Rasl2-9",52.7422938197269,0.427739033205243,0.384902040842789,1.11129323260707,0.266442151389691,0.408322649359128,0.38312482968085  
"Gm13357",3.48814678770533,0.930609216556971,1.0187375061336,0.913492642563935,0.360983501379102,0.50607249855405,0.633814990605331  
"Gm12245",0.081018275684709,0,4.78471990596022,0,1,NA,NA  
"Gm15798",0.485954678575461,1.32306322816281,4.78471990595285,0.276518428281817,0.78214990749718,NA,NA  
"Mif-  
ps",0.688050466956113,1.39081705863097,2.56885442681167,0.541415287730874,0.588221372257784,NA,NA  
"Kpna2-  
ps",15.7219022224973,-0.629181572662915,0.447693680240503,-1.40538408387833,0.159907097001543,0.281203449705242,-0.798228096515367  
"Zfp133-  
ps",84.2980654752473,0.209510259365822,0.213614034965633,0.980788829720526,0.326696887840258,0.471602570453051,0.157471820367188  
"Gm12989",0.159000708466872,2.28561396140279,4.74700141535114,0.481485839463083,0.630171241568535,NA,NA  
"Gm12892",0.309260850219262,-0.0624821282067858,4.78471990596322,-0.0130586804316202,0.9895809766245,NA,NA  
"Gm6539",0.0789318165836824,0,4.78471990596069,0,1,NA,NA  
"Gm9575",1.56719006279904,-0.613223773754575,1.15164137140371,-0.532478069112025,0.594394927185893,0.717172790239513,-0.203859177312072  
"Rnf138rt1",0.434517486938135,-0.900114888984919,4.71568493776883,-0.190876808112375,0.848622110538559,NA,NA  
"Gm2986",12.055203383871,-0.810683136341188,0.47376282333945,-1.711158

19225084,0.0870519141359679,0.17733490912987,-1.40225093705243  
"Gm13153",0.118397724875524,0,4.78471990595411,0,1,NA,NA  
"Gm8624",4.27936744775707,0.253138824094787,0.719875262815952,0.351642  
620840419,0.725106297273119,0.819078997985706,0.0505201157984169  
"Olfr1118",0.102718135213499,-0.0615907277687127,4.78471990596623,-0.0  
12872378943627,0.989729611211579,NA,NA  
"Gm13123",0.316542946969242,0.906628501314603,3.90632849429266,0.23209  
2232550138,0.816466377707902,NA,NA  
"Gm5883",0.0900267936067733,0,4.78471990596623,0,1,NA,NA  
"Gm13436",1.62108383957957,-1.15798550505855,1.80792637979784,-0.64050  
4789353224,0.52184447646497,0.655136411184984,-0.489725738578622  
"Ccnb2-  
ps",19.8629348219203,-0.0469251383821989,0.513711871651688,-0.09134524  
8127759,0.927218265439412,0.955393000028413,-0.00214131160234917  
"Gm15161",3.74750322759617,-3.10269228993444,1.64940165053096,-1.88110  
172494108,0.0599580824122553,0.133485121132011,-6.24809394453668  
"Gm12901",0.892638496176848,1.76908586039059,1.7652161010774,1.0021922  
2978469,0.316250759883547,NA,NA  
"Rpl23a-  
ps14",1.0687051437734,3.35478275552145,2.91426152658264,1.151160499811  
21,0.249666212186393,NA,NA  
"Gm11865",0.258024280882172,-0.920638352944717,4.03530436750664,-0.228  
145951110391,0.819532778098534,NA,NA  
"Gm16202",0.462724057341431,-1.763723309331,4.67394341632133,-0.377352  
302377499,0.705911808395591,NA,NA  
"Gm14197",8.27837728860259,-0.00978386312945097,0.548259613823895,-0.0  
178453106571399,0.985762257828245,0.990792953406625,-9.04977343736673e  
-05  
"Gm16209",2.63881313441248,-0.245175520526225,1.16983710095905,-0.2095  
80906884579,0.833994782788198,0.89375155694601,-0.0275399392916899  
"Gm6039",0.114810471722162,0,4.78471990596601,0,1,NA,NA  
"Prdx6-  
ps2",0.133306294967721,0.418920675205161,4.78471990596623,0.0875538554  
895961,0.930231279251637,NA,NA  
"Gm12421",1.24933230851768,0.274232784469847,1.65437694225473,0.165761  
972054627,0.86834427393633,NA,NA  
"Gm14108",0.575389172321379,0.289893908820912,3.71714715790373,0.07798  
82787810844,0.937837376771716,NA,NA  
"Gm7803",0.227648960235433,-1.13762170066451,4.77794594574683,-0.23809  
8487003016,0.811804708196056,NA,NA  
"Rps15a-  
ps4",13.8226931490678,-0.146828598667437,0.497894786255544,-0.29489884  
7549042,0.768071152340319,0.849936453053083,-0.0238734041550461  
"Gm13394",35.8685850927358,-0.373243668368192,0.682655295569845,-0.546  
752762031425,0.584548600360615,0.708537150928216,-0.128602145492572  
"Gm13473",1.86192266572897,-2.192159233072,1.45539652252709,-1.5062281  
6472423,0.132008611629231,0.242821123542145,-3.10284843391472  
"Gm11660",0.134418836436093,-1.08130773501465,4.7800317013581,-0.22621  
3507058422,0.821035365768439,NA,NA  
"Gm12739",1.35010253350738,0.731620399214146,1.47153646941814,0.497181

289365827,0.619061214641581,0.737217099070515,0.223051202694081  
"Gm6092",0.381776475727153,0.883219077702068,2.68471273233668,0.328980  
850376996,0.742170162328856,NA,NA  
"Gm12721",1.18282254065854,-0.123998594243916,1.72672117781329,-0.0718  
11590566638,0.942751848698669,NA,NA  
"Gm15670",1.96187601140489,1.64025776688326,2.00626419003094,0.8175681  
82213312,0.41360380191209,0.557052354056913,0.959708341289099  
"Gm13369",0.422578771286159,3.35563882636676,4.67620293818155,0.717599  
058622482,0.473004538254261,NA,NA  
"Gm14584",33.8538200255044,0.581098155766542,0.340686140030377,1.70567  
008013513,0.0880695233256785,0.179059391637547,0.999510753516582  
"Cyp2j7-  
ps2",0.166327329563128,1.38732773038271,4.78471990596561,0.28994962247  
4867,0.771854778158552,NA,NA  
"Gm12455",0.122422938474846,0,4.7847199059634,0,1,NA,NA  
"Gm3828",0.727601845000792,-2.15261874848224,2.42074106095053,-0.88923  
9573454004,0.373874338922333,NA,NA  
"Gm13071",12.825883193313,-0.988932480669372,0.55868806931199,-1.77009  
772535006,0.0767108624221393,0.160898063199965,-1.80676407870643  
"Gm15502",1.33328587659183,1.83767377108026,1.26905424433977,1.4480655  
8055075,0.147598710521082,0.26467501307899,2.44273258548776  
"Gm13033",8.94648767504614,0.621728660998943,0.552627346194432,1.12504  
14321339,0.260571477679675,0.401959372100354,0.566646150134774  
"Gm14400",8.80172928268567,-1.64736264220779,0.759348105116332,-2.1694  
4327786979,0.0300490463156965,0.078798309413818,-4.18572399843053  
"Ndufs6b",0.342091124893044,0,4.78471990595298,0,1,NA,NA  
"Hmgb1-  
ps5",38.8376014092288,-0.151664510348665,0.651257774471347,-0.23287938  
5542503,0.815855066344239,0.882553069530513,-0.0189484113389922  
"Gm13039",2.65754117297081,0.111230050245063,1.07272648834584,0.103689  
105707254,0.917416072436708,0.949331351328659,0.00578367151328871  
"Gm15712",108.235639587838,0.286000128719102,0.266099449287973,1.07478  
66238896,0.282470270452106,0.426413730929221,0.243770838245116  
"Gm8839",10.8910042864692,1.06110608809398,0.619971495990938,1.7115401  
1911137,0.0869814516948017,0.177235274861035,1.83600766311351  
"Gm14248",0.152473496529706,-0.051202652786563,4.7847199059636,-0.0107  
012852983818,0.991461772642737,NA,NA  
"Gm13771",0.625376276924498,1.01117756118084,2.06642539686757,0.489336  
591930033,0.624603419073355,NA,NA  
"Gm12577",11.1983743514216,0.162936041523056,0.673399716626068,0.24196  
0365441515,0.808810874597304,0.878121647011892,0.0211768209126217  
"Ldha-  
ps2",1.75532304711613,0.264857036552931,1.08358386489923,0.24442689221  
6195,0.806900216310852,0.877024383612742,0.0347546684110567  
"Gm11957",2.67289286199472,-0.243964043115722,1.1359208013344,-0.21477  
2053499796,0.829945042526038,0.891437692897741,-0.0280362830158059  
"Ube2d-  
ps",719.053548414419,0.246517739056819,0.206234770332582,1.19532578652  
608,0.231959768642375,0.36908369258928,0.245712082471259  
"Gm13477",0.509875643994549,-0.0706529049403666,2.94577447925045,-0.02

39844921727831,0.980864978603106,NA,NA  
"Gm13007",0.114810471722162,0,4.78471990596601,0,1,NA,NA  
"Gm15696",16.8306427794466,-0.242961472207458,0.654240302837883,-0.371  
364269601811,0.710366234533881,0.807857733504906,-0.051840521282674  
"Dnajc19-ps",0.0918205622261725,0,4.78471990596623,0,1,NA,NA  
"Olfr1175",137.964797539442,0.322961535598648,0.216507739547286,1.4916  
8586893917,0.135781515336116,0.248215637167034,0.45003314360452  
"Gm13886",5.47367519407719,-1.59344832389953,0.820781220215613,-1.9413  
8009575919,0.0522121907600915,0.120194122556775,-3.37595475850705  
"Gm13341",34.1637228473822,0.991658739481013,0.564409814466995,1.75698  
351457176,0.0789206191756263,0.164541727190586,1.78953851587983  
"Gm13472",0.605665745986563,-0.196340521583029,3.07091963238229,-0.063  
9354151481706,0.949021652743756,NA,NA  
"Gm11439",0.470010880944733,2.0552541198903,3.56877133359831,0.5758996  
38214712,0.564683020173127,NA,NA  
"Gm12034",1.39606798343968,0.72992111630535,1.99931034528507,0.3650864  
49948457,0.71504687522951,0.811034657748805,0.152877956816596  
"Gm14038",0.333359299745902,0,4.78471990595527,0,1,NA,NA  
"Hspe1-  
ps6",164.152760027947,2.73400202220451,0.777843065104044,3.51485041759  
524,0.000440001748575257,0.00312082724398704,15.7742543702101  
"Gm13213",4.4861657782446,0.108915714569288,0.694727748879086,0.156774  
671437868,0.875422435245634,0.922183844871549,0.00882333581613782  
"Gm12441",0.592596950816445,-0.528317535664799,3.58988197884918,-0.147  
168497119831,0.882999025469232,NA,NA  
"Gm15703",1.57573837861111,-1.47911144149627,1.5403243790272,-0.960259  
709990701,0.336924522129118,0.481377176850116,-1.08138453494363  
"Gm1848",0.10983060364978,-0.0679381626182718,4.78471990596623,-0.0141  
989842568543,0.988671230351372,NA,NA  
"Gm11489",0.919622760887107,0.208041533738925,2.33200193156939,0.08921  
15615011166,0.928913777266689,NA,NA  
"Gm14843",12.1081987277024,0.419202146671702,0.594623292841488,0.70498  
7765730615,0.480817849803619,0.618280448161377,0.20155789408357  
"Gm12346",278.448375999114,1.02691299263338,0.56256512423015,1.8254117  
5839627,0.0679389162236913,0.146680654249755,1.97115689681591  
"Gm13294",0.893768704990765,0.751198364978236,1.90478535709278,0.39437  
4285890547,0.693304725536406,NA,NA  
"Gm15975",0.0861613871363745,-0.0663162651309467,4.78471990596623,-0.0  
138600098718955,0.988941666162528,NA,NA  
"Gm12805",0.119420756039598,-0.0600781498785438,4.78471990596623,-0.01  
25562522068701,0.989981823466683,NA,NA  
"Gm15186",7.39468438736674,0.533885995161573,0.478612663773468,1.11548  
656266702,0.264641973526622,0.406499985717858,0.480588895765404  
"Gm15842",1.84764132728508,-1.64904255786415,2.15658684402281,-0.76465  
3907833402,0.444477659493177,0.585688004649454,-0.882185075713998  
"Gm13604",0.305436228037336,-0.558934432090393,4.78471990595931,-0.116  
816541631674,0.907005435173556,NA,NA  
"Gm4342",0.595428276788995,1.58486790895594,2.07839133614339,0.7625454  
75144628,0.445734512767162,NA,NA  
"Gm14219",1.80623575657727,0.521782923156038,1.01186909193645,0.515662



477798866,0.606090165602706,0.726745051278228,0.166542438064332  
"Rps18-  
ps1",0.243322981813832,1.30641437679619,4.05530834877741,0.32214920899  
6659,0.747339660294416,NA,NA  
"Gm13932",0.287012367791931,-1.68472950240736,3.9305768790648,-0.42862  
1435031746,0.66819874381083,NA,NA  
"Gm12093",0.0942094774975221,0,4.78471990596623,0,1,NA,NA  
"Gm15750",2.14288489732158,0.894446461995071,1.04511215618878,0.855837  
774633545,0.392087517650156,0.536561090619227,0.556859876005268  
"Gm3835",0.101823727744439,0,4.78471990596623,0,1,NA,NA  
"Gm14749",6.55441459816315,0.73685914202814,0.686100383467399,1.073981  
53358291,0.282830958167825,0.426730482268533,0.627511201051858  
"Gm10600",87.8629181087794,-0.227096731010267,0.546434089254762,-0.415  
597663974417,0.677704436350682,0.78297292368848,-0.0555608421191079  
"Gm15515",0.841381970958195,-1.34526940238684,2.22594214364773,-0.6043  
59554549022,0.54560461961085,NA,NA  
"Gm12294",2.81219240471742,0.499312483448195,1.28026579533793,0.390006  
891745788,0.696531450796465,0.797506851713595,0.112976865603382  
"Gm14829",0.53338705337661,-0.172075241395728,2.60684568550892,-0.0660  
089863977258,0.947370670949775,NA,NA  
"Cct3-  
ps1",0.506342296750524,3.07060172390708,4.70219939354887,0.65301393388  
7992,0.51374729561086,NA,NA  
"Gm14451",0.56327579045478,0.849636447929215,3.52010678982787,0.241366  
668302345,0.809270943988463,NA,NA  
"Gm11483",0.177952396446594,0.839062816117595,4.78471990596623,0.17536  
2995662784,0.860794415171306,NA,NA  
"Gm14466",1.26921497900598,-1.94025387848364,2.04069170886228,-0.95078  
2457760543,0.341714819428059,NA,NA  
"Gm13786",0.275898275001372,0.426040422382417,4.00227670144324,0.10644  
9517153271,0.915225707217851,NA,NA  
"Gm14049",21.8007064712618,0.402401450840537,0.750080692072749,0.53647  
7548473556,0.591628548585864,0.714675264254208,0.1351775183435  
"Gm12361",0.091991025955798,0,4.78471990596463,0,1,NA,NA  
"Gm13725",0.14430642271865,-1.19870620812803,4.7761387806117,-0.250978  
094060848,0.80183104564832,NA,NA  
"Gm14122",22.5030105754028,0.77568431821066,0.350326323630155,2.214176  
51455037,0.026816638779086,0.0722896202011087,2.03778066757614  
"Gm16053",2.14523485627105,-0.835685303925352,1.41154294481993,-0.5920  
36754526062,0.553825976566077,0.683449296904138,-0.318064172550557  
"Gm12527",0.947879217789591,-2.50132654071641,2.29295753042002,-1.0908  
7347128415,0.275328561779281,NA,NA  
"Rps10-  
ps4",2.78513497586839,3.96795134893839,1.40845772879839,2.817231406954  
33,0.00484396112137514,0.0193937482432387,15.644856515129  
"Gm12101",1.22813741863527,3.07917418107048,1.75237219333344,1.7571462  
2315088,0.0788928887303931,NA,NA  
"Gm11618",0.343733563634772,3.14371254973467,4.62499942107724,0.679721  
717457523,0.496680682136276,NA,NA  
"Gm11478",15.4919162654318,1.38473932838815,0.685265515663243,2.020734

00271414,0.0433073079450172,0.104273387294634,3.13053434978798  
"Gm14398",1.37050088957233,-2.17549107128027,1.49960018933463,-1.45071  
405482119,0.146859500147742,0.263659669614961,-2.90013874477979  
"Gm11649",0.297562618722717,-1.98254658363626,4.75019914825887,-0.4173  
60729889176,0.676414574177565,NA,NA  
"Gm13302",22.9255414466399,-0.854860032340888,3.56747030337411,-0.2396  
26390591777,0.810619904011665,0.879302747617215,-0.109957241757036  
"Gm14270",0.586606655600555,-2.02919592111262,3.1520680162438,-0.64376  
6540142981,0.519726834086631,NA,NA  
"Rpl21-  
ps9",1.11598001200441,1.38474600242327,1.21857943932797,1.136360878685  
87,0.255805561634882,NA,NA  
"Gm11895",0.304554677461712,0,4.78471990595499,0,1,NA,NA  
"Gm16459",0.268665461882368,-0.527376861505252,4.78471990595742,-0.110  
221051988564,0.912234066920509,NA,NA  
"Gm15937",39.4651589903736,1.06767000343747,0.564024156609885,1.892950  
84425957,0.0583644067671962,0.130833433334881,2.17145956718225  
"Gm6276",3.90319651282551,-0.799189573148949,1.33666742810266,-0.59789  
7095677241,0.549908597906769,0.679776697013008,-0.3084799197836  
"Gm13983",0.0951499328418777,-0.0591165963197125,4.78471990596623,-0.0  
123552888113676,0.990142156618947,NA,NA  
"Gm8855",0.231536648368306,-0.546020342811395,4.7847199059605,-0.11411  
7514408983,0.909144638432468,NA,NA  
"Gm7416",11.5111335053472,1.50079047940965,0.627742190869756,2.3907752  
2785311,0.016812842376837,0.0503172372469023,4.48647442279599  
"Gm7645",2.87371277644498,-0.392694959568416,1.48263906281871,-0.26486  
21430639,0.791115662532166,0.865610167679695,-0.0566739818279293  
"Gm15312",0.227309469052963,-0.0878863054160408,4.78471990596037,-0.01  
83681191675525,0.985345185369138,NA,NA  
"Gm11745",0.976249558103727,-0.17076967458075,1.89983547364827,-0.0898  
865596255131,0.928377361779424,NA,NA  
"Gm15263",0.55493251880178,1.74941613765526,3.59496149930937,0.4866300  
06466367,0.626520555117208,NA,NA  
"Gm14269",0.895187846545316,-1.83105282565533,2.15433337807989,-0.8499  
3940319827,0.395358777103077,NA,NA  
"Gm13378",2.85519112475181,5.86052937993577,4.64642951499235,1.2612973  
8136045,0.207201724331678,0.34029811497802,6.3172594037895  
"Gm11285",0.148177164577155,2.59891947282788,4.7275994170606,0.5497334  
36265582,0.582502219767124,NA,NA  
"Gm12057",41.3985539201617,0.516689290004192,0.453460574177106,1.13943  
597178614,0.254521359616928,0.395210437987645,0.479661734544057  
"Gm15782",1.30448373725069,-0.792897227051012,2.00764191037737,-0.3949  
39567137237,0.692887488296635,NA,NA  
"Gm13650",0.45104052888615,2.52773189978561,3.61557642895592,0.6991227  
9534236,0.48447529381268,NA,NA  
"Gm12941",18.436677694432,-0.695482562875119,0.664675099153624,-1.0463  
4965829279,0.295399626196007,0.43977261293195,-0.571337168920502  
"Gm16418",0.113058343341289,2.23400583696369,4.75316341366045,0.470004  
004184502,0.638352156775581,NA,NA  
"Vmn1r-ps135",0.241829449368322,0,4.78471990596296,0,1,NA,NA

"Gm13422",0.191297905118859,1.38382996204852,4.78471990596623,0.289218  
593615684,0.772414103934671,NA,NA  
"Gm12929",0.258198919919415,-0.950989010374361,4.00112347230119,-0.237  
680495730219,0.812128912371768,NA,NA  
"Gm13578",0.126156906482596,-1.01046558774237,4.78119218472428,-0.2113  
41763456146,0.83262059629306,NA,NA  
"Gm13252",4.57772982907157,0.410590504770995,0.812832616681765,0.50513  
5370240373,0.613463760078723,0.732833990565797,0.127626343888341  
"Gm6136",61.699120498825,0.696368565926534,0.446598050870484,1.5592736  
3446663,0.118931629235857,0.224961275013937,1.03886143043868  
"Gm15710",3.28271901118174,-0.781544869142236,1.62027129458729,-0.4823  
54326558199,0.629554260792186,0.745550640027836,-0.229486754550681  
"Gm14277",0.145394353254768,-0.871817723083018,4.78314940389616,-0.182  
268553512644,0.855371975943831,NA,NA  
"Gm13169",20.8914254720149,2.04243135565626,1.93939367522802,1.0531288  
1120752,0.292281959814222,0.436203881441466,1.69449403831714  
"Esrp2",2022.1056560144,-0.0184258481219352,0.292305577248351,-0.06303  
62523198799,0.949737636534373,0.968767169089574,-0.000584670136069287  
"Rpl3-  
ps2",1.31390479977907,0.927183778186388,1.52117934954062,0.60951641137  
2786,0.542182198112068,NA,NA  
"Gm15982",5.36913524966519,-0.684508988730172,0.646321365138988,-1.059  
08457564755,0.289561263874116,0.433338830566076,-0.572410605800806  
"Vmn1r207",48.4568134067275,0.501008251081692,0.254181285755203,1.9710  
6663298652,0.0487162547045255,0.114148940755009,1.08731375083647  
"Gm9085",2.0279154829133,-2.28913881293062,1.26597709253029,-1.8081992  
3712469,0.0705754973250117,0.151051706568944,-4.32677697940475  
"Gm9103",0.306143679460681,0,4.78471990596003,0,1,NA,NA  
"Gm13400",0.476638259404878,-1.7947267184094,2.684190209738,-0.6686287  
40205628,0.50373233444219,NA,NA  
"Gm12516",0.1691215272529,-0.069920857026113,4.78471990595435,-0.01461  
33647110879,0.988340636894116,NA,NA  
"Gm12104",5.45103170331195,0.604746656868853,0.668518435511283,0.90460  
729988148,0.365673466664583,0.510628178258687,0.406458446065651  
"Gm12380",3.1053509018037,-0.906423782292829,0.93476324403405,-0.96968  
2738466566,0.332204657154704,0.476989829353233,-0.670989369178042  
"Gm12944",1.98167852651884,-3.75991454536245,1.56059138982517,-2.40928  
827999215,0.0159836669908001,0.0484680464986968,-11.3806993465834  
"Gm11577",0.196296791098055,-1.01285714876005,4.7813977931156,-0.21183  
2855701399,0.832237435002265,NA,NA  
"Gm12186",3.04278567072483,-0.636710472072598,0.942752944400543,-0.675  
373623444322,0.499438419063752,0.634828199671814,-0.289321791424762  
"Gm15644",26.7137520927394,0.869625047510352,0.767587445932801,1.13293  
286923622,0.257242445492663,0.398135672504838,0.800892010941031  
"Gm15576",1.60108831703227,-0.796818964714826,1.79978498459326,-0.4427  
30088058214,0.657960976680828,0.767179634762147,-0.211184357060196  
"Gm12696",0.559967286184342,-1.16117925843472,3.74665352262277,-0.3099  
24376893507,0.756618464826228,NA,NA  
"Gm6451",21.3850927560243,1.10346271358797,0.552228621390483,1.9981990  
6257214,0.0456950831425093,0.108432280501768,2.4514852545329

"Atp5l2-

ps",2.02873184122819,1.22221049929239,1.08399842288185,1.1275021010114  
5,0.259530252701725,0.400785749024096,1.11750163115788

"Gm12240",95.0488783199195,0.248558368309355,0.249256274513511,0.99720  
0045593564,0.318667418841826,0.463732456915751,0.191004055371569

"Gm11954",2.81785283187696,-1.54751986980991,1.5895482666901,-0.973559  
534012952,0.330275286781067,0.474869666076045,-1.15246110479464

"Sycn",7.78904385022083,5.50714689233119,1.21403406935261,4.5362375170  
1458,5.72666839201386e-06,0.00011011694310403,50.1919585530709

"Gm13508",0.13113039344513,0.888765848589111,4.78471990596623,0.185750  
862340109,0.852640139965061,NA,NA

"Gm11759",0.576619626164188,1.26037099195638,3.10001274975913,0.406569  
615577973,0.684324117244194,NA,NA

"Gm13474",0.316800332695845,-2.09481900619746,4.74676175126146,-0.4413  
1538846262,0.658984687146543,NA,NA

"Gm13282",0.323715967371509,0.790636779805383,4.78471990596273,0.16524  
2019458671,0.8687534930844,NA,NA

"Gm15372",1.37937431601492,3.96559957614452,2.67782112029378,1.4809053  
3235822,0.138631801893935,0.252408523048645,5.45946624042827

"Gm9089",0.596936991396707,-1.35855586183582,2.58677529320912,-0.52519  
2839672756,0.599449142038065,NA,NA

"Gm13711",0.144488890497902,0,4.78471990595983,0,1,NA,NA

"Gm12422",0.203518452085701,0.03443998879989,4.78251274228522,0.007201  
23304542073,0.994254296994237,NA,NA

"Gm5398",2.84560249183953,-1.49567342443146,1.3325766198787,-1.1223920  
6520643,0.261695776729604,0.403277737435626,-1.35826557732605

"Gm15593",0.153630865766811,-0.0640809466078614,4.78471990596623,-0.01  
33928313187062,0.989314386109064,NA,NA

"Gm12792",3.12611073232252,0.49699545045559,0.922360561714334,0.538829  
901326067,0.590004229407872,0.713420307906647,0.167827680116355

"Gm15168",0.0816801940885108,-0.0798587155561809,4.78471990596623,-0.0  
166903637257015,0.986683634724691,NA,NA

"Gm11814",0.158274779698728,0.390276797381651,4.78471990596623,0.08156  
73236995549,0.934990786590049,NA,NA

"Gm15488",0.588323129215741,-0.674582911545401,2.68539966162113,-0.251  
203916194049,0.801656456940437,NA,NA

"Gm14388",1.70202371736413,-1.90649142563903,1.37274082054796,-1.38882  
110672429,0.164887155359776,0.287641563496906,-2.37556485274843

"Gm11975",0.348453170469829,-0.188604462729916,4.72292566833458,-0.039  
9338198342687,0.968145888270191,NA,NA

"Gm15421",4.82635188423916,-0.609267055340497,0.768616096922732,-0.792  
680582386691,0.427963946230801,0.570903493450632,-0.3415155678617

"Gm15383",0.886025056415215,1.28253253712965,2.11075160844427,0.607618  
88419213,0.543440273164438,NA,NA

"Gm13416",0.397909035474254,0,3.13957255710309,0,1,NA,NA

"Gm13784",0.14421404863738,-0.0434568845137795,4.78471990596623,-0.009  
08243018772982,0.992753368808529,NA,NA

"Gm12267",1.6600385551138,-1.64420378110645,1.6147344684749,-1.0182502  
5303348,0.308559043116371,0.45347736660006,-1.30025265885976

"Gm13550",10.3055421845524,1.28710964702772,0.710992437096789,1.810300

05365936,0.0702492687454688,0.150469102713298,2.43778247101534  
"Gm11597",0.125558793514292,-1.03498639904526,4.78089210794988,-0.2164  
83948115925,0.828610536062342,NA,NA  
"Gm12844",0.318194705218591,-2.00988002970469,4.7491532047183,-0.42320  
8084276555,0.672143448998886,NA,NA  
"Rpl36a-  
ps4",0.0882428325998401,-0.073514744232334,4.78471990596623,-0.0153644  
822846716,0.987741399111397,NA,NA  
"Olfr588-  
ps1",0.981688036558716,-0.529508789155386,2.32439905634953,-0.22780459  
6508046,0.819798153148038,NA,NA  
"Gm14142",0.369456144291281,0.4.61093548114786,0,1,NA,NA  
"Gm14541",1.20469000183111,-0.0553741087735247,2.40174720852237,-0.023  
0557606466805,0.981605794185719,NA,NA  
"Gm12504",19.1202198060436,-2.75136925821181,1.00576347889602,-2.73560  
266995561,0.00622661587624012,0.0235375254662524,-10.3153216505661  
"Gm8317",1.59782277495279,-2.08679934452479,1.54245697683513,-1.352906  
02970759,0.176085652858538,0.302388414605935,-2.49590163761228  
"Gm14914",13.8510030670446,1.07735363376556,0.576589445743026,1.868493  
50386083,0.0616933147646036,0.136374421195778,2.14646667474966  
"Tpt1-  
ps6",1.27433734480451,-1.3787337534473,1.72319415751565,-0.80010354459  
1305,0.4236508076647,NA,NA  
"Cyp2j15-  
ps",8.86285606493038,1.14771397943847,0.613025240021905,1.872213254053  
71,0.0611771061378891,0.135595227404406,2.29322561078339  
"Gm5228",1.22584842801574,-0.503412108838818,1.69406597507779,-0.29716  
2044598471,0.766342797706162,NA,NA  
"Gm6977",0.419424616018907,0.811002742184554,3.03641835416564,0.267091  
898279413,0.789398405313525,NA,NA  
"Gm6654",7.35631624063378,0.350563233955288,0.739830468510965,0.473842  
655684154,0.635612114118888,0.750305189397667,0.100708135775861  
"Gm6630",0.48683180224813,-2.29284971988171,3.1044362235401,-0.7385720  
15909252,0.460166922140248,NA,NA  
"Gm12194",0.306377369911245,1.37818505398358,4.78471990595428,0.288038  
815452606,0.773317026712174,NA,NA  
"Gm8216",0.28997124024544,-1.96354699460525,4.75011599003126,-0.413368  
220634194,0.679336854352311,NA,NA  
"Gm6142",3.01670551362066,0.901200081316519,0.98380500537697,0.9160352  
67548981,0.359648397550962,0.504811829029792,0.616032920462498  
"Gm11743",0.469327358744693,1.72484276109827,2.6149177155064,0.6596164  
57860219,0.509499990071371,NA,NA  
"Gm12151",0.365306691621117,-0.530099148802063,3.16051441611375,-0.167  
725591156735,0.866799162556785,NA,NA  
"Rps15a-  
ps3",0.131153024706045,0.866360449715805,4.78471990596623,0.1810681642  
27442,0.856314072791983,NA,NA  
"Tpt1-  
ps3",8450.49377888443,0.410105630461527,0.40008565996042,1.02504456296  
209,0.305342161316997,0.449993105862309,0.327478785177642

"Gm14438",1.00887523010387,-1.07272953675896,2.30614107683944,-0.46516  
2147941588,0.641815343161476,NA,NA  
"Gm15550",1.29204548684057,0.172222090267698,1.53340701579982,0.112313  
357440762,0.910574951108685,NA,NA  
"Gm14046",0.617746124786348,-1.84510041108599,3.02186740443674,-0.6105  
82849656803,0.541475779490462,NA,NA  
"Gm6733",2.43330092317807,0.698596163191291,0.943371757663566,0.740531  
140047581,0.458977773275128,0.598649428034514,0.358435100625323  
"Gm11599",5.54905441052718,0.244053520449902,0.808013473003192,0.30204  
1399808364,0.762620503387739,0.846115505390862,0.0407811962250732  
"Olfr1269",25.7137957189008,0.279140796104387,0.302777809546019,0.9219  
32807833331,0.356563624916485,0.501682811558605,0.192547750516688  
"Gm14766",0.977235304436269,-2.89873968071303,2.27090436078505,-1.2764  
6929160457,0.201789675432735,NA,NA  
"Gm3928",0.194631999491669,0,4.78471990595726,0,1,NA,NA  
"Rpl17-  
ps4",0.449662131158161,1.14623791283776,3.07891184592181,0.37228669419  
5553,0.709679404297079,NA,NA  
"Cyp4a30b",1.94548699845988,0.475995651307989,1.63916819926108,0.29038  
85345766,0.771519014081361,0.852299021901324,0.0760726011509103  
"Akt2-  
ps",1.71221286162252,-1.88076925600893,1.68607482520462,-1.11547199916  
272,0.264648211032028,0.406499985717858,-1.69301466628902  
"Rpl3-  
ps1",75.0098698735887,-1.33941405925251,0.545413092096382,-2.455779075  
82721,0.0140579551289214,0.0440962048107642,-4.18082234434304  
"Znf41-  
ps",289.930687540275,-0.77798269268686,0.196553117074508,-3.9581295085  
3356,7.55389987401102e-05,0.000793994284331358,-5.55357833463985  
"Gm15452",2.33594603908703,-3.56740637275021,4.69904961808827,-0.75917  
614468637,0.447747194261347,0.588564335853014,-1.89097165881359  
"2610024D14Rik",0.330313376492443,1.20268630152436,3.79126416454928,0.  
317225666512569,0.751072375851311,NA,NA  
"Gm15142",0.172523086745975,0.898372016875195,4.78471990596033,0.18775  
8538541847,0.851065939092667,NA,NA  
"Gm13988",20.2051781738042,-0.287764084203513,0.393939702894585,-0.730  
47748700901,0.465098369238452,0.603906352529865,-0.145129827040136  
"Rps2-  
ps4",0.441949992324356,-0.404004159316413,2.21645647158038,-0.18227479  
96618,0.855367074340784,NA,NA  
"Gm13255",0.417907500757912,1.33615242201312,3.72413193339483,0.358782  
246684563,0.719757994739831,NA,NA  
"AA413626",8.85492785141264,-0.0826959858061509,0.631641426874704,-0.1  
30922359249491,0.895836726799427,0.935867150618047,-0.0054812342998260  
1  
"Gm12251",0.713638300530605,-0.574630886174744,2.74992651872864,-0.208  
962269450171,0.834477692984046,NA,NA  
"Gm13852",0.335771373507864,-0.573670885517915,4.76418292008349,-0.120  
413278654687,0.904155773091885,NA,NA  
"Gm13967",37.4468682672282,-0.115249566049605,0.652637973139226,-0.176

590346858378,0.859830177010521,0.911090092459711,-0.0107312896136285  
"Gm15666",76.3423008757662,0.40496106779248,0.770862688103994,0.525334  
893025524,0.59935040498442,0.721152069689338,0.132383898690755  
"Gm12586",0.0850557901623812,0,4.78471990596509,0,1,NA,NA  
"Rps15a-ps8",0.0831453134050955,0,4.78471990595975,0,1,NA,NA  
"Gm11870",1.90482834952947,-0.499151265066879,1.06039393443233,-0.4707  
22482333036,0.637838927265734,0.752182375942137,-0.1421465318856  
"Gm11510",35.0741909451666,0.807075464104144,0.399669406154771,2.01935  
762826841,0.0434500621706745,0.104552549944935,1.82242923208329  
"Gm12017",0.23740455656729,2.0815821615286,4.7564212623506,0.437636207  
289995,0.661650019935687,NA,NA  
"Rpl10a-  
ps1",3819.83955654117,0.0150716714042323,0.565957321706197,0.026630402  
7285938,0.97875452398317,0.986597513758148,0.00020336372309009  
"Gm16276",2.95332069962837,0.0419196596234307,1.63872731047489,0.02558  
06193962086,0.979591844493213,0.986845872266198,0.000555075380329726  
"Ubl5",4549.15552921042,0.506187191279173,0.161225545693181,3.13962151  
036828,0.00169166242015368,0.00883708446130557,2.39365711381073  
"Gm2568",10.7371226329456,-3.34094498460305,1.35909898201272,-2.458205  
78840798,0.0139633135644311,0.04387698434799,-10.4450147059925  
"Gm5526",2.80152144347477,0.126981051212694,0.926277736055128,0.137087  
448256596,0.890961673639462,0.932561768321665,0.00886580304945116  
"Gm14539",1.27873570233452,3.29678698224036,1.47476960420807,2.2354589  
9836381,0.0253872305377463,NA,NA  
"Gm16274",3.90208637064622,1.50758984602546,1.13149413713818,1.3323885  
6176358,0.182732538791387,0.310900439908766,1.76129090509443  
"Gm10241",0.124111539944299,0,4.78471990596102,0,1,NA,NA  
"Pabpc1l2b-  
ps",8.99556169184957,-0.118603165198839,0.707599326949374,-0.167613451  
118113,0.866887388454764,0.916277459754485,-0.0103701930548227  
"Tmem240",156.038900208096,-0.222318971015876,0.231453732825286,-0.960  
53309792024,0.336786981439942,0.481251195611285,-0.162596516324113  
"Gm16359",0.103664682855674,2.13777789841149,4.75859684961849,0.449245  
432208211,0.653254616975913,NA,NA  
"Gm9850",0.548388054812317,2.20076070280541,3.00418074524284,0.7325660  
10314242,0.463823168265271,NA,NA  
"Gm1980",38.81678583732,2.45089844290643,0.461715052997344,5.308248944  
8758,1.10683403776799e-07,4.89622970393912e-06,29.9672457900755  
"Gm12906",0.0939618437451222,-0.544048378937457,4.78471990596623,-0.11  
3705376621746,0.90947135024012,NA,NA  
"Ccdc85c",1054.99896984866,0.584308996423282,0.141998712796987,4.11488  
938817818,3.87365125615805e-05,0.000475260260970854,4.47092675577062  
"Gm14226",329.745569151968,0.329651078819636,0.381148303657752,0.86488  
9271855825,0.387099566434443,0.531413598981819,0.208410243107901  
"Gm281",0.126637915947595,1.37400105073268,4.78471990596623,0.28716436  
4421707,0.773986470752304,NA,NA  
"Gm5724",0.348558012338208,2.00128337745986,3.69614152634098,0.5414520  
42135694,0.588196044738633,NA,NA  
"Bbip1",1473.10326807398,0.304787339999361,0.111231338530007,2.7401211  
2078593,0.00614165466859705,0.0232795456314746,1.14605531310843

"Crocc2",24.2379201566489,-0.852580809711622,0.544298125178062,-1.5663  
8571818102,0.117258344407145,0.222532917972601,-1.2811563377813  
"Gm16260",0.0721532113593249,-0.544048378937457,4.78471990596623,-0.11  
3705376621746,0.90947135024012,NA,NA  
"BC021767",93.5418704929928,0.558831514058346,0.284760765933579,1.9624  
5965354896,0.0497089935015024,0.11581144166475,1.20472445892044  
"Gm11549",18.5489479664295,0.0159526914861273,0.461493983559116,0.0345  
674961200958,0.972424620340532,0.983164907824719,0.000270851387141391  
"Slc2a4rg-  
ps",1384.75402820327,0.123959947473244,0.159831675221103,0.77556558987  
2995,0.438005524238392,0.580178784755447,0.0674861473414473  
"Abhd11os",563.40161063396,0.447941666767936,0.398391570756583,1.12437  
536245371,0.260853819496343,0.402319868101542,0.407854388239815  
"Khdc1b",0.181891354531166,-1.4938004313743,4.76490239842872,-0.313500  
740721761,0.753900258020323,NA,NA  
"Gm16288",0.226132152656234,-0.557546306129575,4.08292080226743,-0.136  
55574847789,0.891381956333212,NA,NA  
"Ascl4",28.312433456175,0.886279012864889,0.502790170235274,1.76272143  
994018,0.0779474828866861,0.163070817738692,1.6073296567346  
"Gm2735",1.28776394713656,-2.86221550410088,1.9341319971453,-1.4798449  
6835035,0.138914624803943,NA,NA  
"A730046J19Rik",0.95235776428977,-3.31526078271436,2.03641147090519,-1  
.62799160684394,0.10352666546192,NA,NA  
"Gm6542",56.8709622735527,1.17635538677912,0.564054834582896,2.0855337  
3653646,0.0370208791234023,0.0924005505821938,2.8016342708976  
"Gm11962",0.0847127044266364,0,4.78471990596508,0,1,NA,NA  
"Sbk3",25.4644755508586,-1.0567687140262,0.441758222814856,-2.39218798  
756599,0.0167482615729325,0.0501855853925061,-3.16188098702856  
"Trav8-2",0.131991305736293,-0.0737222719952369,4.78471990596623,-0.01  
54078553069136,0.987706796542645,NA,NA  
"Gm17131",889.940114262349,0.431905325275264,0.282623118594389,1.52820  
238989408,0.126462295620365,0.235484847675091,0.624582052204987  
"Gm12254",0.558155400327385,-0.112774424492237,1.86238473850056,-0.060  
5537739656488,0.951714588954684,NA,NA  
"Gm3160",0.112482966358412,0,4.78471990596623,0,1,NA,NA  
"Gm3362",29.091615633334,0.884009489932751,0.399289517407262,2.2139561  
6812823,0.0268317942976503,0.0723063709506621,2.32215417188669  
"Gm16304",0.220934797106265,0,4.78471990595636,0,1,NA,NA  
"Gm11634",0.455689560421819,1.81791404609998,3.00323975308137,0.605317  
655453507,0.544967952547939,NA,NA  
"Gm16976",0.665392266842462,0,4.78471990593798,0,1,NA,NA  
"Gm16363",0.920974230748337,-0.958208127032058,2.10267788959755,-0.455  
708471455633,0.648599629379464,NA,NA  
"4930526A20Rik",37.6329461292693,0.551855513507368,0.580621263727621,0  
.950456946692625,0.341880120121802,0.486354777625485,0.397786794999432  
"Dpy19l2",0.96292606444186,-3.24699814618437,4.16474163733928,-0.77963  
9754138211,0.435602949299196,NA,NA  
"Rtl9",1.29754102780797,-1.11981639280749,1.60809875011958,-0.69636046  
4632049,0.486203115676026,NA,NA  
"Gm4969",1.89719022888416,-1.54516481996399,1.27543748512535,-1.211478



28724207,0.225712151280794,0.361863846560386,-1.57064034231825  
"Gm11346",37.5174436836939,-0.192293583957298,0.451820694586044,-0.425  
597114655131,0.670401443119599,0.776977970635967,-0.0485239938595496  
"Ap3s1-  
ps1",0.0967909267146322,0.873134203046213,4.78471990596623,0.182483869  
52755,0.855203012076385,NA,NA  
"Gm8813",2.68484453943807,1.65140595963107,1.18087732762518,1.39845682  
612279,0.16197592885322,0.284062480732153,2.07839523907294  
"3110053B16Rik",55.9484960623652,-0.0242934451552576,0.301098284982412  
, -0.0806827749174218,0.935694235775191,0.959820915915004,-0.0009962391  
50878961  
"Gm9855",2.28481065366113,-2.34847748915558,1.26578439699476,-1.855353  
48257679,0.0635457654901625,0.139371803771337,-4.62793338838955  
"Gm16328",0.220934797106265,0,4.78471990595636,0,1,NA,NA  
"Gm14267",3.1029608315079,-1.16490812904287,1.17214997405221,-0.993821  
741953116,0.320309659189497,0.465553316054925,-0.890605643694279  
"Tmem238l",113.524973803743,-3.10397216068557,0.910048006363495,-3.410  
7784852899,0.000647776951358382,0.0042171469107131,-16.9743711918807  
"4930469K13Rik",31.3958815813732,1.85119908102816,1.05787415259091,1.7  
4992372816205,0.080131475665362,0.166504464078745,3.31870597579808  
"Gm15163",0.515399495526161,-0.546210528241713,2.60708948252033,-0.209  
509697271181,0.834050366036108,NA,NA  
"Rpl9-  
ps3",6.70062163635291,0.41106092135417,0.713244111623092,0.57632571325  
2284,0.564395045881772,0.692198679368649,0.151222018960673  
"Gm12335",0.163291395009403,0.396091996082896,4.78471990596623,0.08278  
26923764118,0.934024331367834,NA,NA  
"Gm9816",0.130762743722646,0,4.78471990596536,0,1,NA,NA  
"Gm13092",10.319418374288,-5.17454179506535,4.12241242411926,-1.255221  
76403077,NA,NA,NA  
"Rpl30-ps9",1.52604226900029,0,4.40205355404997,0,1,1,0  
"Lin52",685.358405923429,0.362405344664019,0.217451119456358,1.6666060  
1964274,0.0955927711402798,0.190716039260532,0.600494661679936  
"Zfp703",1719.7024500256,-1.76702807691253,0.401580219544439,-4.400187  
0383882,1.08157612544678e-05,0.000181866834250497,-15.2180624965255  
"Gm6963",0.203510844029321,-1.64554864687299,4.75964460597379,-0.34572  
9310295074,0.729546154637463,NA,NA  
"Gm15843",0.211367906384565,-1.42453409711513,4.76769657564095,-0.2987  
8874934981,0.765101235758792,NA,NA  
"Gm13548",0.374543983854531,-0.0683732026573264,3.82249912873914,-0.01  
78870420514339,0.985728966306795,NA,NA  
"Armh2",0.406515729511306,1.54765462804919,3.07491224305012,0.50331668  
21418,0.614741639520556,NA,NA  
"Gm5834",6.56475008823424,-0.767324951334614,0.637789901117933,-1.2030  
9987660455,0.228937673150028,0.36546804904857,-0.772371203041377  
"Gm15229",0.552930007501934,-2.0156127437033,2.34546197287428,-0.85936  
7053064278,0.390138040907542,NA,NA  
"Gm12091",3.45918985464582,0.665824069562005,0.933326779601784,0.71338  
7940980422,0.475605733107055,0.613236383026145,0.32559116643397  
"Gm8091",0.0868509581959284,1.37368365413655,4.78471990596623,0.287098

028961665,0.774037261341309,NA,NA  
"Gm15899",0.186532250969118,2.58455303728257,4.72811595368714,0.546634  
867376096,0.584629609587287,NA,NA  
"Gm8980",0.284775560229403,2.72331773931162,4.71696123594181,0.5773457  
95967278,0.563705882845337,NA,NA  
"Rtl1",2.75309919219323,1.16218573647512,1.00770627185106,1.1532981077  
3162,0.24878804656199,0.388286987262121,1.09943997343515  
"Tmem61",494.013819681897,1.1376439254303,0.613945178180096,1.85300571  
755053,0.0638815391543786,0.13988794366937,2.2376472852545  
"Cd63-  
ps",3.07184039898564,0.155114730348978,1.06779020709732,0.145267047139  
008,0.884500031280755,0.927951660474155,0.0115988028566321  
"Syna",9.49909008652418,-0.0474585042238075,0.626131753186902,-0.07579  
63543331766,0.939581116603741,0.962511041050371,-0.00181337718619079  
"Gm5970",32.1780598367047,-0.849312957118978,0.598420115355612,-1.4192  
5870358531,0.155823606995032,0.276104024826348,-1.09304673653407  
"AW822252",294.709683954105,1.80777372398283,0.660272228356396,2.73792  
179398925,0.00618287770667938,0.0234039505969393,6.78791996642344  
"Rad51ap2",1.89742939869572,1.23084606543606,1.22396389270666,1.005622  
8560094,0.314597025007482,0.459855520923298,0.956174056200588  
"Wipf3",354.552703580705,-0.405845088351791,0.385449463965143,-1.05291  
387404418,0.292380466792922,0.436277212943169,-0.336639340122139  
"Ncr3-  
ps",0.246932996014129,-0.0547276470229735,4.78471990596105,-0.01143800  
43343375,0.990873991925147,NA,NA  
"Gm16060",0.12306405236781,-0.555750866275238,4.78471990596623,-0.1161  
511806746,0.907532726960215,NA,NA  
"Zfp989",3.14508017600356,-3.88867477616852,1.71146322239398,-2.272134  
58360448,0.0230783828633112,0.0642831870098346,-10.6723013293581  
"Ccp1os",450.681901759798,0.837809135842843,0.239739112379825,3.49467  
02168292,0.000474647839311825,0.00331471474602506,4.78337383102307  
"Gm6425",2.08802677497804,2.29824993644593,1.12331817019412,2.04594744  
16307,0.0407615419983584,0.0993584880465048,5.30670708573893  
"Gm8661",0.32020227437472,-0.0620385279676119,4.78471990595626,-0.0129  
659685806024,0.989654943716663,NA,NA  
"Ubap1l",14.28568219742,0.183963858745285,0.50280819054477,0.365872836  
212091,0.714459966664234,0.810574911557037,0.0386345288140872  
"Marcks1l-  
ps4",1.51992441011773,-0.666242199193922,2.95624555247556,-0.225367679  
161838,0.821693253193447,0.885697111546566,-0.0808686429542329  
"4930558K02Rik",0.820094539650539,1.03625604068076,2.0894454546303,0.4  
95947878603086,0.619931184873743,NA,NA  
"Olfr75-  
ps1",29.7765030921127,-0.0860187007815265,0.486118800290408,-0.1769499  
56944967,0.859547697745283,0.911029575198301,-0.00801521546004693  
"Nbdy",698.575730374951,-0.499803035037845,0.201475539417497,-2.480713  
22445825,0.0131119815900204,0.0416923380695072,-1.58809310926295  
"E130218I03Rik",0.557333680962975,-1.26192869351986,4.56471436434252,-  
0.276452937204017,0.782200202232065,NA,NA  
"Gm6569",1.55287252192255,-1.74932261095411,1.74660603264616,-1.001555

34691692,0.3165583963743,0.461719405451449,-1.35187287501138  
"Gm11978",0.563075813826459,-0.43822236469107,3.0360088516362,-0.14434  
1596519028,0.885230732934649,NA,NA  
"4930529C04Rik",1.81642903707847,0.303380519614621,1.2805464541484,0.2  
36914887883844,0.812722819891043,0.880701914201943,0.0385402657932448  
"Gm13898",0.484063767496141,-1.99199070019007,3.07487490606545,-0.6478  
28207990087,0.517096068736492,NA,NA  
"Gm15645",1.93474596556426,1.75989664101935,1.10592516279079,1.5913342  
9659767,0.11153436226149,0.214102370413237,2.71253047368483  
"Gm8865",0.543678373215213,1.51809548156507,4.41195154144077,0.3440870  
70609421,0.730780806071481,NA,NA  
"Gm15506",199.828145466836,0.382267282444576,0.389611377666931,0.98115  
0203399262,0.326518676420832,0.471417154078278,0.28746954518708  
"9130208D14Rik",27.4857236723,0.240630025075204,0.375910082780198,0.64  
0126551795381,0.522090328291424,0.655360665745586,0.101682923858395  
"Scml1",0.912727040436098,1.84003505002727,2.3626485669885,0.778801839  
48501,0.436096453988146,NA,NA  
"Cd101",45.3101127317602,-1.33545961506153,0.464669301803856,-2.874000  
08969228,0.00405308847958519,0.0169611030611471,-5.44444531035873  
"Gm2830",0.140642619833913,0.335131608350052,4.78471990596623,0.070042  
0536491938,0.944160187837391,NA,NA  
"Gm15280",37.4316738393225,0.503977008101015,0.238085613886138,2.11678  
899818801,0.0342777594948726,0.0870952204998575,1.23008353069838  
"Gm15500",23071.462656574,-0.300207890897222,0.267492180345907,-1.1223  
0529695862,0.261732654764465,0.403277737435626,-0.272627725803414  
"Susd5",149.056724639024,-0.434548334427787,0.360349867567995,-1.20590  
674102521,0.227853451148348,0.36424420681237,-0.438863720285461  
"Btbd18",4.76896078081411,0.358505476779941,1.07238527858265,0.3343066  
00379454,0.738148210306639,0.829103854171257,0.0671874595097573  
"Gm13194",11.569230945187,0.687755542675809,0.442674197325985,1.553638  
1989966,0.120270742221019,0.226880701608498,1.02016907782351  
"Gm11560",0.557045304152667,-1.06920347644719,2.0252730537476,-0.52793  
0529895079,0.597547553902142,NA,NA  
"Gm15432",1.3970537366018,-0.137830700978401,1.31956786609152,-0.10445  
1392399125,0.916811140448204,0.948932138043268,-0.00722480855922822  
"Gm13750",0.187787236499751,-0.067809283929856,4.78471990596358,-0.014  
1720487849957,0.988692719586269,NA,NA  
"Gm12833",1.16794791214278,-0.123763040724792,2.03514275032943,-0.0608  
129531477626,0.951508174295432,NA,NA  
"Gm9458",0.140709930694066,0.859955692287477,4.78471990596623,0.179729  
578572649,0.857364871210476,NA,NA  
"4931428L18Rik",3.9756370299868,-2.08584043368183,1.86090688487831,-1.  
12087308109359,0.262341890692368,0.403975847790222,-1.89060615602411  
"Hnrnpa1l2-  
ps",0.350886064031409,1.23251827096874,4.71026592221358,0.261666388123  
905,0.793578656234951,NA,NA  
"Isoc2a",7794.94254876185,1.00390990474904,0.413829668469655,2.4259012  
3724456,0.015270425273419,0.046765981375982,3.07457370533907  
"Gm6081",1.29750924685044,-0.541541669434361,1.36410689526108,-0.39699  
3572362755,0.691372200489659,NA,NA

"3110082J24Rik",0.091991025955798,0,4.78471990596463,0,1,NA,NA  
"Gm13352",0.304236741780473,-0.566874445364233,4.78471990595634,-0.118  
475993685346,0.905690515378018,NA,NA  
"Gm15276",0.435223780448303,-1.07765740789774,4.72383967807572,-0.2281  
31664353335,0.819543884459651,NA,NA  
"Gm13835",16.0994092261554,-19.4380322642419,4.71629420056148,-4.12146  
304654356,3.76473866164579e-05,0.000465546311615029,-149.134395081124  
"Gm6286",2.23009757710609,0.453524045906059,1.17324903016848,0.3865539  
49114223,0.699086455813345,0.799459690055636,0.101507374133562  
"Gm12248",7.8546437561448,0.408305428087465,0.784720350586787,0.520319  
66264434,0.602840793537802,0.724360004461703,0.131664931119137  
"Rtl10",31.0832200269031,-1.1219195789437,0.3728350953983,-3.009157648  
49109,0.00261973141180178,0.012249915808011,-4.93895500055329  
"Gm16441",0.121821870984685,0,4.78471990596557,0,1,NA,NA  
"Gm13889",1380.20477366416,-1.32738091772509,0.400918002480814,-3.3108  
5386416045,0.000930117684356761,0.00555790211755689,-6.89247128812226  
"Gm5530",0.0866426562418363,0,4.78471990596623,0,1,NA,NA  
"Tmem74bos",0.739043919295952,-0.445990302781575,1.45251648026869,-0.3  
07046638602733,0.758807873183454,NA,NA  
"Gm8093",13.9134338711094,-1.49322449691414,0.637268477400314,-2.34316  
390951209,0.0191209807862338,0.0555172487692644,-4.3170038805829  
"Lbhd2",7.8856536065843,-0.857468782957643,0.76583042524049,-1.1196588  
1048455,0.262859183783924,0.404708493794926,-0.775656176751127  
"Atg4a-  
ps",0.340010900877752,1.82607246270093,3.7493786435974,0.4870333557319  
45,0.626234693182096,NA,NA  
"Plcxd2",188.771186845874,0.475133272088502,0.279805646679324,1.698083  
21500044,0.0894920570778895,0.181271560330366,0.811413140031842  
"Gm5958",0.194028697802581,-1.09505139192027,4.77919672935725,-0.22912  
8754042218,0.818768845385383,NA,NA  
"BC064078",300.811547303463,0.0154058860899432,0.190620044900233,0.080  
8198639235785,0.935585210618205,0.959820915915004,0.000631773170857218  
"Gm6483",46.275220748798,-0.158302313583174,0.322075164208044,-0.49150  
7359694828,0.623067648043216,0.740676320055275,-0.0475210191243071  
"L1td1",16.6406395278384,0.0316656855698792,0.527843182887186,0.059990  
7067032199,0.952163036336914,0.970226019466797,0.000957134132624491  
"Gm13570",1.61990247547007,-0.21994274203219,1.36810664298016,-0.16076  
4325764172,0.87227902361665,0.920080952257368,-0.0183198274462343  
"Skint6",0.169587515011933,2.81750627912083,4.7150516096972,0.59755576  
6585081,0.550136386344283,NA,NA  
"Tmem274",0.221112090338885,1.39669929731248,4.73545711701847,0.294944  
978446319,0.768035911623979,NA,NA  
"1700073E17Rik",0.0995120633190364,0.0665330642697831,4.78471990596623  
,0.0139053205991893,0.988905516916446,NA,NA  
"Gm13147",2.62275337602787,0.813926813580194,1.28736920415898,0.632240  
394558703,0.527229805546871,0.659730891320299,0.338531099837962  
"Gm5125",0.0932405921486592,-0.0718114130567579,4.78471990596623,-0.01  
50084883688205,0.988025408406769,NA,NA  
"Mroh3",29.6833768553817,0.143102883460017,0.494019239808105,0.2896706  
68526196,0.772068197803986,0.852567577775507,0.0228253110075432

"Gm43213",9.12332800899337,0.614642623476151,0.700719648374068,0.87715  
9110497831,0.380400222034793,0.525286368925949,0.395714112608535  
"Gm4750",2.93523949778979,0.569250728910006,1.01479090311648,0.5609537  
16831522,0.574829089263753,0.700516629231158,0.202617495972698  
"Kif28",0.587823675809934,1.33648670241101,3.45247265792336,0.38711000  
3418507,0.698674772207839,NA,NA  
"Alkal1",0.177277326827117,-1.08508522870382,4.77975297945934,-0.22701  
7009742324,0.820410515588064,NA,NA  
"Lamtor5",3405.4464203187,0.545569727873665,0.233075642303568,2.340741  
06792803,0.0192455093793553,0.0558073976619081,1.57443176839428  
"Gm9013",1.26982958440704,-2.601058459176,1.65547482651202,-1.57118575  
137519,0.116139508761396,NA,NA  
"Gm9392",7.51778889961254,1.15052360951411,0.663554434471009,1.7338797  
6893157,0.0829394181988492,0.170892188105375,2.032655832923  
"Lipo2",29.7177180676405,1.78618088035356,0.667756494012709,2.67489855  
414205,0.00747518658367632,0.0270825422271528,6.44608737204754  
"Gm5353",4.52510169933724,0.93277186054114,0.874005524302637,1.0672379  
4599055,0.28586440148913,0.429976402085556,0.787282723580747  
"Gm13398",203.311883848917,-1.93141517830462,0.491659010733923,-3.9283  
6322763921,8.55259688098559e-05,0.000876292874332407,-13.5967962561974  
"Tmem170b",932.707777414869,-0.303431351322136,0.145976156369506,-2.07  
86363942483,0.0376507832256764,0.0935893640150738,-0.718779877518349  
"Gm15517",1.46789363698333,-1.33955677410519,1.76891416547012,-0.75727  
6299921077,0.44888434668291,0.589647818393879,-0.707593858159579  
"Frg2f1",271.261704731585,0.315226869536391,0.26774192544833,1.1773534  
122777,0.239054476419528,0.377140883665989,0.307389215111243  
"Kantr",539.126123828928,0.202548386466025,0.26720210774313,0.75803438  
8938059,0.44843039596464,0.589104962977937,0.107178662169209  
"Cers1",20.7651461085111,-0.23651330560103,0.526526833083595,-0.449195  
161082093,0.653290877878194,0.76376991786598,-0.0637376608460872  
"Gm15501",25.9634058547844,0.225258837145784,0.625392935370696,0.36018  
7690659256,0.71870677925062,0.813735833100783,0.0464302377592232  
"Gm5475",66.3337705504652,1.64580126983702,0.579487706826024,2.8400969  
5192918,0.00450998245731296,0.0183428531399016,6.58076148416025  
"Gm7799",0.18543324591211,-0.566741528827874,4.78471990596623,-0.11844  
8214308466,0.905712525136422,NA,NA  
"Gm15878",8.87656088191315,0.483970214834512,0.490192583127287,0.98730  
6278171167,0.323492513830458,0.46839871043118,0.367060143668811  
"Zfp111",437.319081043519,-0.421391464884845,0.209084413279859,-2.0154  
1309691418,0.0438613832886196,0.105269479488122,-0.948649842935675  
"Gm16253",2.49670891857684,0.0377838432117,0.948007836462386,0.0398560  
452334395,0.968207894059378,0.980477693900995,0.000744922952335968  
"Gm6058",53.6816233582632,1.02152845310625,0.688324129340702,1.4840805  
5095309,0.137787552241796,0.251246768316706,1.41105735811375  
"Gm13414",0.118966045027455,-0.541540676070616,4.78471990596623,-0.113  
181270108486,0.909886844531687,NA,NA  
"Gm4660",1.5550440492853,0.579258317165606,1.48367567355169,0.39042111  
9313059,0.696225173570675,0.797419964553361,0.131128910658947  
"Ighe",1.36659109336734,-3.16973627747415,2.80057548294492,-1.13181604  
880046,0.257711779054372,0.398660470803725,-2.9150326727225

"1500009L16Rik",246.864632879581,-1.02381567926961,0.395470638731642,-  
2.58885383388564,0.00962959591487897,0.0328362821175779,-3.49758084153  
579  
"Trav13-5",1.28319125658063,-1.5559899766071,1.44592493883131,-1.07612  
08516569,0.281873211270628,NA,NA  
"Tmem250-  
ps",4720.34702460348,0.149018341381016,0.183273681332557,0.81309187602  
6742,0.416165383905183,0.559536109183785,0.0865270849073788  
"Pet100",1502.06147993375,0.797770643104913,0.268817184139616,2.967707  
01493017,0.003000301680548,0.0135416393905845,3.43199809096825  
"Gm13493",1.38898011258682,-1.40638341699394,1.90733819276519,-0.73735  
3984903438,0.460907110599544,0.600265388635653,-0.717794760146299  
"Gm16326",0.493806005927232,1.74757915447216,2.97985123244775,0.586465  
23539252,0.557562916911651,NA,NA  
"Nat8b-  
ps",1.91608902040715,2.14212865954621,1.55352342598068,1.3788840410912  
8,0.167930509394632,0.29164594924526,2.6395624556616  
"Gm2862",33.0955713467069,0.337887888582404,0.465510746389898,0.725843  
369251457,0.467934796517184,0.606272354474852,0.169087872384557  
"Gm6397",0.339729111307548,-0.995749258951784,2.70469150349547,-0.3681  
56315670347,0.712756681275296,NA,NA  
"Gm16301",1.79587732009155,1.4798295563575,1.13873584669354,1.29953716  
716161,0.193759646921333,0.324007340966737,1.66775178896147  
"Gm5766",0.481176416281711,0.397273917797926,3.13614894959497,0.126675  
717315414,0.899197065759068,NA,NA  
"Gm16353",0.376453982661364,-1.39136408053356,3.83121199214259,-0.3631  
65516130954,0.71648124573282,NA,NA  
"Gm16585",0.138651386575802,1.99583778046241,4.76445837330085,0.418901  
294561984,0.675288270922706,NA,NA  
"Gm3470",1.56264881643774,0.29863974346232,1.39725239702677,0.21373357  
0325447,0.830754830871872,0.89210024109011,0.0340977227393124  
"Mia",23.6223402408819,0.944883424444292,0.357135426521114,2.645728634  
78844,0.00815151797268016,0.0288978722602396,3.34865486640383  
"Gm14057",37.9943614898993,0.703747067653864,0.317981656354691,2.21316  
87586056,0.0268860131040978,0.0723965589702665,1.84775584387852  
"Fcor",182.291510864557,-3.36779977155875,0.921596706275033,-3.6543096  
8733703,0.000257874858601683,0.00205477891010037,-20.8385541630564  
"Gm15914",2.28248393266817,0.0627302740884631,1.20609412476618,0.05201  
10933304016,0.958519854179666,0.974767648088204,0.00160314404558793  
"Tnfsf13",217.489622913314,-0.37082652374688,0.259552291576719,-1.4287  
1604598132,0.153085863966912,0.272366837816119,-0.482298998858073  
"Gm16581",0.108960845291504,0.864875509038428,4.78471990596623,0.18075  
7813630843,0.856557677412646,NA,NA  
"Gm16546",2.33488418382891,0.0620465305664156,1.31169425637619,0.04730  
25861513118,0.962272066941157,0.977309134348301,0.00142410842224361  
"Ugt1a8",38.3767735922505,-20.6961936143052,4.71333585206338,-4.390986  
39772188,1.12837600148739e-05,0.000187795454709123,-177.57659453461  
"Agxt2",3369.26191482892,2.15854032498695,0.740263456784318,2.91590825  
564128,0.00354654771573388,0.01535977282463,9.01407160976797  
"Bcl2l2",3007.32194008463,-0.492829477687896,0.205377644793452,-2.3996

2571478281,0.0164118432636947,0.0494358288205653,-1.481977585882  
"Gm14163",0.509110529607793,-1.45330927258639,3.6753166170638,-0.39542  
4237966043,0.692529824214421,NA,NA  
"Mnd1-  
ps",0.713925921985596,-2.25167590842228,2.38332771757653,-0.9447613485  
19827,0.344780728751369,NA,NA  
"Rab42",31.8083709224514,0.223479369370255,0.294143695939948,0.7597625  
66578616,0.447396522275461,0.588364157321519,0.118535515224269  
"Nat8f7",381.265007032178,2.63714975346645,0.67341820983349,3.91606540  
327817,9.00058403005084e-05,0.000908821270936982,18.46891464798  
"Gm15946",3.78685053617257,0.373446256878822,0.703916650116096,0.53052  
624457346,0.595747117669609,0.71840418704447,0.123507241661654  
"Gm2541",0.163354934636162,-0.548689472717204,4.78471990596623,-0.1146  
75358955291,0.908702445761211,NA,NA  
"Gm15833",0.389427427235554,3.08277330086896,4.68307970475021,0.658279  
058915439,0.510358831625975,NA,NA  
"Galnt2",1235.88516943854,0.477631621510431,0.314194090455618,1.520180  
1562143,0.12846570330656,0.238146442581413,0.685339040958794  
"Cbxb6",12162.7596151771,0.0543058415277795,0.203505500016688,0.2668519  
59889666,0.789583146124444,0.864369894061783,0.00791531989200709  
"Gm6264",3.92981369806847,-0.25682387038334,0.990961625270612,-0.25916  
6312634161,0.795506921927685,0.868952042786891,-0.0360753664107571  
"Cd300ld5",19.0867558345142,-1.04797277598856,2.18335116854585,-0.4799  
83610097191,0.631239047365463,0.74661200761491,-0.306227736668844  
"Klra8",18.6943201061008,-1.8913713615386,0.700056292411155,-2.7017418  
1996748,0.00689773007046656,0.02549480167588,-6.93997243994591  
"Clec2f",4.55330553720396,-2.1683441239264,1.32301965206032,-1.6389356  
8818095,0.101226654194963,0.199232998461033,-3.49814684276193  
"Tgfbfr3l",709.258292870659,0.21967100403764,0.199795490846499,1.099479  
28808069,0.271559063320874,0.414113766356202,0.193665152262261  
"Gm20431",12.8289093493962,-1.26545088535215,1.87260970351597,-0.67576  
8625451513,0.499187557482447,0.634702249481105,-0.575273072127533  
"Matr3-  
ps2",1.0716744683632,1.13837999317915,1.62933996194509,0.6986755494661  
53,0.48475481752253,NA,NA  
"Cd300ld2",4.32493851729656,0.590943298017292,1.08428368159341,0.54500  
8015936261,0.585748004520004,0.709417640358472,0.202877257977174  
"Ear-  
ps7",0.458358087947492,2.82134874662531,4.44202565057346,0.63514913432  
8181,0.525331154179257,NA,NA  
"Zfp966",342.448664398679,-0.349693214679318,0.328814709059466,-1.0634  
962641409,0.287556958474523,0.431623216038202,-0.293813028024657  
"Ier5l",1324.0541556587,0.200102823207154,0.314915491053691,0.63541752  
9120654,0.525156138565296,0.657896067190063,0.0837847154778436  
"Gm16580",77.2644809443745,0.00201380209493102,0.32115474678773,0.0062  
7050390839174,0.994996894529429,0.996888620807502,6.27546968934382e-06  
"Tmsb15b1",50.1427399048313,0.424222033567975,0.373487544269545,1.1358  
3984279223,0.25602359880839,0.396847772443437,0.392067071001828  
"Gm16574",20.1141180405093,-1.50636488736354,0.551165052072638,-2.7330  
5588171621,0.00627496849745039,0.0236652486969609,-5.63944994175883

"Slc5a3",5934.42674711467,1.13658954807174,0.26189765924866,4.33982323  
985798,1.42597370877708e-05,0.000223859249642613,9.55245896135131  
"Gm3531",1.78445075074399,2.90787173530371,1.15551368222594,2.51651865  
316046,0.0118520626280151,0.0386634627942176,9.45890034714594  
"Gm454",61.721636359435,-3.13183154967388,2.5610764286097,-1.222857512  
05559,0.221383518638147,0.357240407713861,-3.22373925821406  
"Slc25a5-  
ps",8.41650503889614,1.81724637603314,0.673778275142117,2.697098501209  
22,0.00699465767284823,0.0257324217556971,6.65112816069858  
"Rdh1",179.580530657017,-0.204585519909623,0.369556254273362,-0.553597  
77447655,0.579854149468166,0.704428222156717,-0.0716803908079734  
"Gm16588",28.5390128807811,0.587434535446784,0.37160834677437,1.580789  
39976948,0.113926199060706,0.217735054821177,0.895530027196176  
"1700028K03Rik",5.04706754166382,-0.573139700126762,1.05119864457206,-  
0.545224923078248,0.58559883222083,0.709325093535549,-0.19683986290046  
4  
"Rps19-ps10",0.182214093436818,0,4.78471990596019,0,1,NA,NA  
"Gm16107",0.102760101933905,-0.0623644520303791,4.78471990596623,-0.01  
30340862696298,0.989600598256686,NA,NA  
"Gm10171",1.47218766685608,3.59201098017689,4.68278680766337,0.7670669  
47036447,0.443041712606427,0.58434873249003,1.92983422745982  
"Gm16570",0.465912655471389,-1.46695315227971,3.64246436894293,-0.4027  
36445354832,0.687142119723153,NA,NA  
"Gm16298",1.04400078700237,1.3291798427505,2.09464079990053,0.63456218  
4988289,0.525713997682199,NA,NA  
"Gm7241",0.2808204873217,1.36404686336258,4.78471990596389,0.285083952  
701677,0.775579824039613,NA,NA  
"Rasgef1b",801.815299872736,-0.461230221418587,0.259385516021897,-1.77  
816490485787,0.0753767750697597,0.158868917988344,-0.848514091307164  
"Gm15310",1.25199094091664,-2.06312550912167,1.72355529378044,-1.19701  
730287772,0.231299810658857,NA,NA  
"Gm7162",3.72454545385005,0.285649095615208,1.05871115497296,0.2698083  
36554747,0.787307708960178,0.862605400612809,0.0422183461619922  
"Gm15950",42.8333936789616,0.380505701091436,0.341958194947661,1.11272  
578552965,0.265826217592561,0.407616733903639,0.341476441308136  
"Rbm12",930.784041762344,-0.38229577780117,0.105721830459394,-3.616053  
33676099,0.000299128767848562,0.00230621301522786,-2.32135672878541  
"Shkbp1",1351.42044936943,-0.0841933469522219,0.182987845709483,-0.460  
103492807329,0.64544193714155,0.758076434575384,-0.0233191206557821  
"Npcd",0.790695829652786,-1.41195245413286,1.82139856596486,-0.7752023  
53025298,0.438220098006834,NA,NA  
"Gm2962",3.98399644989896,-0.607638058750472,1.00908828011333,-0.60216  
5410822359,0.547064037393126,0.676904086882293,-0.237115980649076  
"Gm4491",0.616810807950601,-1.07156971431179,2.09240915688612,-0.51212  
2455010891,0.608565309894374,NA,NA  
"A530032D15Rik",33.2080313840021,-1.38231078100285,0.696265122721509,-  
1.98532245245859,0.0471086075766131,0.111201408054334,-3.0361243118104  
5  
"Timm10b",1696.49981829455,0.330129476980665,0.170937936799161,1.93128  
268167026,0.0534481038785889,0.122330218267957,0.693612325784897



"Zfp882",131.600662921174,-0.217395526304045,0.23993796156558,-0.90604  
8900663959,0.364909970136863,0.509890683512151,-0.14642869640884  
"Olfr1565",48.2749468857151,0.365641541868377,0.347758370784358,1.0514  
2412832129,0.293063838939913,0.437062775864343,0.302633621828415  
"Umad1",952.342851330509,0.304147385172955,0.233796640542504,1.3009057  
1219162,0.193290730644764,0.32358398438324,0.343168456647709  
"Gm44503",0.669618159838885,-1.38483336745047,4.76908010691589,-0.2903  
77459888387,0.771527485598976,NA,NA  
"Gm16134",0.362549170663459,-0.0595456393982808,4.76346052647434,-0.01  
2500500228214,0.990026303618737,NA,NA  
"Rps6kc1",723.572626654778,-0.445361547570444,0.116776028178483,-3.813  
80968780463,0.00013684086020703,0.00126993007725686,-2.97002416566596  
"Mup13",1.38966113382848,2.01514702655187,2.0816673349925,0.9680446979  
58007,0.333022047028607,0.47774860750252,1.48852988448145  
"Tmem102",791.154168073373,1.00771397821425,0.253701449586777,3.972046  
59199069,7.12577778677365e-05,0.000761306385131576,7.2358646977368  
"Gm16102",35.0779306018337,-0.313917984778801,0.581261951567486,-0.540  
062847623623,0.589153691182935,0.712524418228809,-0.106399705886689  
"Gm3355",0.580183059952856,-0.0520154258259831,2.12712861545732,-0.024  
4533524903007,0.980490991896206,NA,NA  
"Gm8113",2009.03111670363,-0.687770465927791,0.261055842819255,-2.6345  
7219919026,0.00842433853326465,0.0296173373100602,-2.42053619284822  
"Gm16563",0.650404090414773,1.71662860969718,2.07905486593538,0.825677  
396890078,0.408987117524693,NA,NA  
"Gm16558",0.308814008033429,-0.581547413853148,3.89140461848559,-0.149  
444087898387,0.881203225191589,NA,NA  
"Mfsd14a",2674.47519837157,0.0544223922049466,0.121955328549953,0.4462  
48580131987,0.65541769471609,0.765360114948772,0.0145530275408599  
"Uckl1",1843.74170864323,0.207217213973041,0.138524615620398,1.4958873  
0526337,0.134683024997287,0.246785980772212,0.289945328192603  
"Gm16539",0.100532412451372,0,4.78471990596383,0,1,NA,NA  
"Bcl2a1b",838.059752740052,-1.36773271372704,0.450538450312347,-3.0357  
7355668273,0.00239919474623191,0.0114711866508165,-6.11091610125186  
"Gm8459",0.689843793534157,-1.43655055359835,1.98002492067709,-0.72552  
1451066944,0.468132189897683,NA,NA  
"Gm16114",0.290095882672122,-0.0612448683107369,4.78336243492401,-0.01  
28037273244401,0.989784382764802,NA,NA  
"Gm16199",100.906787368744,0.251123790038054,0.293501146324509,0.85561  
4341486761,0.392211134560822,0.536692589070595,0.156281820094428  
"Gm7281",0.576843308001586,-1.92533122105113,3.72211839770906,-0.51726  
7592088461,0.604969373729646,NA,NA  
"Pira2",84.8781815835429,-0.587017845369666,0.46206549718969,-1.270421  
2907909,0.203934603278341,0.3363204681317,-0.639667945165944  
"Ugt1a5",25.7080646912894,-3.36457029244065,2.35409497646168,-1.429241  
52427264,0.152934826587174,0.272172622197583,-4.37837848649146  
"Pakap.1",55.4613876293603,-1.12241177331515,0.924936921565531,-1.2135  
0088546079,0.224938376043933,0.360973191529306,-1.14368325555265  
"Gm14435",115.097938590784,-0.100908664526095,0.319159390347139,-0.316  
170125580012,0.751873381880164,0.838595668336011,-0.0177626100968598  
"Rnf224",1.48583850248931,-3.18088646238166,1.58872325576043,-2.002165

22975183,0.0452669638974859,0.107622882828092,-7.09058395518635  
"Ugt1a1",172.835252236907,-0.289219961064809,0.870715670142345,-0.3321  
63496055524,0.73976580627208,0.830394570563789,-0.0537527748356665  
"Gm16550",0.400455056217593,-0.523014306496955,3.14481955727503,-0.166  
309798375251,0.867913155442003,NA,NA  
"Vmn1r190-ps",0.29457972947502,0,4.78471990595405,0,1,NA,NA  
"Gm7420",5.41046967142238,0.337580067584627,0.900691505870047,0.374800  
989444807,0.707808478353851,0.806344300356409,0.0726622380135775  
"Gm2389",0.150798618677057,0,4.78471990596031,0,1,NA,NA  
"Crb1-  
ps",6.41949324708335,0.341746845609913,0.846040470430535,0.40393675900  
1616,0.686259224473321,0.789420788128661,0.0808080176290452  
"Fbxo24",27.9554170172069,-0.44941718216222,0.334062639839888,-1.34530  
812058966,0.178525752226901,0.305556102257735,-0.532838842825035  
"Gpx2-  
ps1",0.561547568088293,-0.0594643790816491,3.62066180895451,-0.0164236  
214867082,0.986896435068363,NA,NA  
"Gm16238",38.3828245042596,-0.842135529352063,0.31343428213567,-2.6868  
0095748921,0.00721399267379806,0.0263800504789412,-3.06128662684126  
"Gm45713",4.47943859417686,-1.86771517604603,2.3123350309906,-0.807718  
237631813,0.41925280231723,0.56225264045542,-1.07543785414351  
"Gm16332",35.3463638217967,-0.976731485642599,0.509440400987346,-1.917  
26349883048,0.0552044646279948,0.125321166066916,-2.02854970064448  
"Gm5822",1.44548159168653,2.21653084962022,1.47038034405286,1.50745408  
056172,0.131694305605689,0.242380174693197,3.14137350505832  
"Tmsb15b2",36.1516408299662,1.43552800274154,0.795146547483498,1.80536  
280674895,0.0710179273013973,0.151797099810113,2.70627249186022  
"1810020005Rik",28.7251235270207,-1.343734321076,0.504922556254453,-2.  
66126815772285,0.00778469312389682,0.0278763732154262,-4.8105363337225  
8  
"Ier3ip1",2131.10005869705,0.100022644313209,0.174216046744578,0.57412  
9916171581,0.565879890464749,0.693365556732336,0.0366280842982572  
"Gm15446",862.665565447618,0.0992196576442557,0.22140186167525,0.44814  
2833549385,0.654050116686717,0.764383195397004,0.0266589379842201  
"Gimap1",991.130360646104,-0.681941946974754,0.21465126960906,-3.17697  
607014746,0.0014881931483864,0.00799140457373672,-3.29336276223376  
"Gm6493",36.4720173137829,1.77151893837218,0.683607258375955,2.5914279  
2395267,0.00955785604087971,0.0326659206108804,6.06111551257106  
"Gm15740",2.18856490014189,-1.49162537490319,1.16771795650264,-1.27738  
497690886,0.201466365965427,0.333264715669288,-1.63902505411288  
"Galnt4",753.006689659688,-0.744851877345654,0.229142670109229,-3.2506  
0311547646,0.00115160498149544,0.00655017325822581,-3.74531171486767  
"Gm16027",0.593006716906273,2.14533065972506,2.57952088913815,0.831677  
955684956,0.405590746794855,NA,NA  
"Gm8194",0.166079751795917,0,4.78471990595323,0,1,NA,NA  
"Pakap.2",10.7611099476774,-2.4793487356774,1.20221371665432,-2.062319  
45396303,0.0391773320873753,0.0963885957147815,-5.80010757095674  
"Olfr1062",0.349189585672877,-0.508425930118475,3.21171145214802,-0.15  
830373858101,0.874217462328976,NA,NA  
"Nwd2",38.7405335639854,0.893425202388102,0.64011458353406,1.395726992

27616,0.162796722772266,0.284989271019361,1.12152000240676  
"1110002E22Rik",12.159293077146,-0.779054973148156,0.559877078108757,-  
1.39147502837547,0.16408142689808,0.286672012693437,-0.973364160954216  
"Cdk5r2",2.92112742991326,-3.5256989886554,1.83985429766128,-1.9162924  
9834461,0.0553278751990976,0.125527450620433,-7.3166391831509  
"Lime1",1948.12274742301,0.520455044517874,0.281229709051717,1.8506403  
4049889,0.0642213121267793,0.140426953442631,1.02168855471288  
"Gm16147",5.69635064473706,0.344725078797984,0.60669891444525,0.568197  
948917038,0.569900564040252,0.696803235571382,0.124532696552161  
"Rnf8",1215.89351253962,0.133559361828131,0.149626187950307,0.89262022  
6831469,0.37206058352062,0.51725042834118,0.088046088908825  
"SrpX",331.181322976617,-1.91432491886823,0.350565220284321,-5.4606812  
3162829,4.74311020519303e-08,2.61986296829614e-06,-24.6036476562506  
"Gm14399",114.817947036115,-0.424675503812307,0.500183017370899,-0.849  
040229403467,0.39585890732077,0.54020555535697,-0.26151753380502  
"Alms1-  
ps2",42.4622849382615,0.517242616306098,0.592312479905315,0.8732596962  
81905,0.38252154320912,0.52739393646524,0.330935706350129  
"Ttbk2",919.283891103322,0.0287677598562546,0.115488701728837,0.249095  
880597915,0.803286615856685,0.874624044150445,0.00385376215830155  
"Ear-  
ps10",0.0804673502708677,-0.544048378937456,4.78471990596623,-0.113705  
376621746,0.90947135024012,NA,NA  
"Cmc4",761.841184140668,0.524763024577891,0.227529025525565,2.30635640  
163162,0.0210907260011532,0.059939380627848,1.47690436519855  
"Shprh",1149.78522395929,-0.206842809915527,0.106374704812362,-1.94447  
364418434,0.0518383606618072,0.119558121147849,-0.43932433557976  
"Nhrlrc4",170.762170478928,1.18163058810284,0.714745290173818,1.6532191  
3183294,0.0982862741507379,0.194695293446214,1.93352522068067  
"Gm3076",0.512923822355948,-2.35638858292675,3.12672300031836,-0.75362  
8825670464,0.451072130474195,NA,NA  
"Usp49",671.344253034941,-0.295378223096896,0.205188800296559,-1.43954  
359433842,0.149996567763946,0.267970778656901,-0.388976888512599  
"Gm8185",0.123813063655936,-0.924826464410838,4.78261850165001,-0.1933  
7240971484,0.846667321482057,NA,NA  
"Abhd12b",2.23462152990274,2.29643793635106,1.15733701302526,1.9842430  
6015083,0.047228750369843,0.111431047278703,5.0391869538585  
"Kcne1l",35.8226109933995,0.555942686782722,0.377072914837782,1.474363  
88270393,0.140383643430368,0.254860361229545,0.759995605248787  
"Ugt1a7c",8804.03019433338,0.750680924744432,0.516627732047237,1.45304  
031932183,0.146212559694283,0.262896762165172,1.00290510865285  
"Pou3f1",18.0223325086298,-0.50002114867342,0.510042929117743,-0.98035  
1104049893,0.326912836848847,0.471739675316668,-0.375679880037194  
"Olfr287",0.131429725537869,-1.03751416062827,4.78068967600954,-0.2170  
21858966233,0.828191309889634,NA,NA  
"Gm10177",1538.65201229719,0.184655486538317,0.255003315220818,0.72412  
9748581567,0.468986082664616,0.607029383948134,0.09217597134486  
"Uba52",5319.41664058284,0.0715738564020946,0.2538376014564,0.28196711  
5949086,0.777968725301017,0.856609114858777,0.0110777414970749  
"Gm3687",0.513332085120026,-0.547648781544567,3.44530951260154,-0.1589

54886213123,0.873704417414104,NA,NA  
"Gm614",9.92274652670101,-0.560855016796345,0.630298821198136,-0.88982  
3997655928,0.373560398780091,0.518706783607336,-0.368154498134822  
"Gm15795",9.86093381730441,0.669139618216029,0.627610302738561,1.06617  
054451824,0.286346554794165,0.430435982220078,0.564055705551981  
"Ugt1a6b",609.917220575741,-2.29949658211934,0.756011524624242,-3.0416  
1577862488,0.0023531204979561,0.0113174996223848,-10.3049757381816  
"Acad11",5526.18356552341,0.0768625373711993,0.47147635195149,0.163025  
222904727,0.870498575327673,0.918650206848829,0.00652177497796284  
"Gm16285",0.0826362641167121,0.4.78471990596623,0,1,NA,NA  
"BC035044",127.495764249136,-1.5467819741082,0.414985226406557,-3.7273  
181686541,0.000193528087390906,0.00165066082587397,-9.90958179567783  
"Ugt1a10",837.848319555805,2.57062126898271,0.756227549501084,3.399269  
5329318,0.000675660959558392,0.00434213493390558,13.9826093918826  
"Ear10",0.365748136872381,1.54616177462359,4.68877275442288,0.32975830  
8965839,0.741582591472333,NA,NA  
"Ugt1a2",209.77468442062,-0.122687205230499,1.29395441126813,-0.094815  
7092414564,0.924461208917604,0.953509556256635,-0.00584062644377641  
"Fbxw10",59.8006978342888,-1.59870203161345,0.54730012475811,-2.921070  
10266081,0.00348831326056131,0.0151853386814969,-6.69444465816134  
"Ugt1a9",2595.76301337087,3.92536251718654,2.26397117610167,1.73383944  
045861,NA,NA,NA  
"Cd200r2",2.07593720373411,-3.47548090523142,1.40185270698203,-2.47920  
547424243,0.0131675427193202,0.041828078843484,-11.0318277758379  
"Ang-  
ps1",0.0791521452115832,-0.0571644332921712,4.78471990596623,-0.011947  
2893744294,0.990467669035775,NA,NA  
"Gm7592",0.436023380572942,-1.8501037125664,4.70170660839611,-0.393496  
20609303,0.693953025571463,NA,NA  
"Dnaja1-ps",0.216760439587237,0,4.78471990595095,0,1,NA,NA  
"4930503B20Rik",9.10523153910275,-0.904459492894169,0.89307427533462,-  
1.01274834341778,0.311180380159057,0.456361480404594,-0.7095213956601  
"Tep",5.32245600853487,1.12751600282356,0.875107269777556,1.288431763  
46845,0.197595707786366,0.328618313751157,1.2547655897905  
"Itga10",467.789469344935,-0.737880702502399,0.196940309049901,-3.7467  
2257833938,0.000179160036808952,0.00155325139960024,-4.77217324732473  
"Tmem189",6390.86839439832,1.16378116588651,0.240030456491253,4.848472  
9100572,1.24415517080297e-06,3.27375675038008e-05,12.0183533039833  
"Trim34b",18.4974994098028,0.0148201651067388,0.360674375517149,0.0410  
901525385302,0.967224025110703,0.980031236663284,0.000298935085467517  
"4930516K23Rik",0.514304663161865,-0.0622423510058621,2.43018012949654  
,-0.0256122376487198,0.979566625040654,NA,NA  
"Ifi203-  
ps",272.476182994617,-0.394411344898541,0.333221685779308,-1.183630483  
04053,0.236559368189939,0.374690053693537,-0.387176309828635  
"Pcp4",80.206773727034,-1.59721486119432,0.861812242080689,-1.85332115  
651796,0.0638363405363672,0.139820373823645,-3.14235528590977  
"Cfb",10783.24714992,1.52399668397056,0.259504228718819,5.872723891608  
94,4.28692149485802e-09,4.33090131123014e-07,22.3300870552697  
"Car15",3332.72049943428,2.18056951305251,0.622521816172202,3.50280015

319065,0.000460394744932137,0.00323837544613521,12.5005148254218  
"Gm16103",0.0869124700231921,-0.0544872087505081,4.78471990596623,-0.0  
113877530600205,0.990914084029922,NA,NA  
"Bloc1s1",5563.60641808345,0.762887986894987,0.196460461301315,3.88316  
296236794,0.00010310641505973,0.001013767402248,5.25941217556905  
"Alms1-  
ps1",3.4880696517986,-0.421651128536006,1.3061771845214,-0.32281311718  
8619,0.746836778342045,0.835398055425001,-0.0758326713873115  
"Churc1",2694.29191559445,0.565861569356193,0.180454512400644,3.135757  
38189284,0.001714109444604,0.00891229260464894,2.67104981278422  
"Eif4ebp3",646.526363455419,1.07657658979222,0.34275686371467,3.140933  
71646796,0.00168410142675281,0.00881283135234201,5.09387220756234  
"Mettl23",1093.70874133112,0.232847485948681,0.17777305159467,1.309801  
92925744,0.190262850332979,0.319861983585881,0.265414857329639  
"Spopfm3",0.0903403390113135,-0.0633216058579363,4.78471990596623,-0.0  
132341301272366,0.9894410001178,NA,NA  
"Mndal",3346.92198652484,-0.314478715652938,0.332590221375824,-0.94554  
4082300545,0.344381176536984,0.488878353121086,-0.225054047172233  
"Prr22",85.5526954158438,0.472115937390202,0.281528823475283,1.6769719  
4042958,0.0935479689333265,0.187454834813834,0.7904246905597  
"Tarbp1",339.792341373066,0.110054558756499,0.200149875582143,0.549860  
740289753,0.582414893758181,0.706697716005788,0.0382056891483884  
"Lrrc10b",29.4400012987465,-0.587185483503679,0.381445533511677,-1.539  
36914163842,0.123714203062117,0.231784330864336,-0.858434612711229  
"Gm17119",12.7568354476717,-1.10060439185443,0.462934287852309,-2.3774  
5274164173,0.0174326766368153,0.051751268127988,-3.25922676590481  
"Vmn2r99",20.1112276271481,0.270452784849224,0.446441794687405,0.60579  
6294315574,0.544650030764644,0.674788617274026,0.106384170667176  
"Gm5459",0.332199080292827,-1.43966823405126,3.88671064135604,-0.37040  
7876195531,0.711078606155838,NA,NA  
"Adh6-  
ps1",16.7723760241387,-0.366170930696778,0.728208578871504,-0.50283797  
983296,0.615078188656575,0.734357634096252,-0.113058617670006  
"Gm5174",0.435930384138145,2.04106872377438,3.65855872567251,0.5578887  
41665394,0.576920359791973,NA,NA  
"Gm4462",0.929656625504208,0.240465586590455,1.31888064429867,0.182325  
510371202,0.85532727982561,NA,NA  
"Dthd1",0.257312061966709,-0.547665211590433,4.78471990595066,-0.11446  
128976313,0.908872130966286,NA,NA  
"Gm17149",0.166957680997996,-0.550358830503345,4.78471990596623,-0.115  
024252478621,0.908425898927171,NA,NA  
"Cfap97d2",2.6010986053165,-0.904869935761439,1.10301472832233,-0.8203  
60701019593,0.4120105117723,0.555482018983288,-0.531990263499256  
"Gm17081",381.610376335205,-0.709832649946379,0.458104002033469,-1.549  
50108882594,0.121261309975128,0.228417836140957,-1.04812378039359  
"Gm17217",0.113058343341289,2.23400583696369,4.75316341366045,0.470004  
004184502,0.638352156775581,NA,NA  
"Vmn1r5",2.02458997838266,2.06217107431116,1.26474050873721,1.63050923  
099645,0.102993915840856,0.201786110436597,3.30060173017333  
"Gm17148",0.239693619214495,0,4.78471990595708,0,1,NA,NA

"Gm3972",2.45816439861499,1.37310538805152,1.3969144173781,0.982955985  
685032,0.325629101547255,0.470521009570549,1.03520429172334  
"Gm17555",441.479426933762,0.690277523405172,0.337050278884693,2.04799  
570464476,0.0405604202783125,0.0989744241268925,1.59653860718399  
"Tedd3",2.13898095166501,0.874649316052384,1.22926939641074,0.7115196  
38092521,0.476762285895728,0.614217109455193,0.426310037269664  
"Vmn2r79",573.030152053448,0.741809022758319,0.314369823627384,2.35966  
993968725,0.018291201004045,0.0536222879532204,2.17037777477026  
"Gm3512",91.667788530757,-0.816549056081397,0.333766071539979,-2.44647  
112366419,0.0144262353001935,0.0449980380552188,-2.5322299911647  
"4933411K16Rik",57.9665831414238,0.697342451830302,0.587820032892791,1  
.18631964344347,0.235496092043492,0.373369881498131,0.687011819414058  
"Gm8229",0.0778527997966676,0,4.78471990596551,0,1,NA,NA  
"Gm6158",259.858050579115,-0.0542802128492906,0.278074744559917,-0.195  
200081672986,0.845236315123854,0.900913883577592,-0.00566390163066715  
"Cdv3-  
ps",0.254134604453599,-0.541756010891157,4.78471990595397,-0.113226274  
795524,0.90985116533686,NA,NA  
"4930523C07Rik",2079.66414913467,-0.485667291421408,0.401941920754729,  
-1.20830216094272,0.226931057572589,0.363138912435794,-0.4919663180150  
72  
"Gm8362",0.10500178835157,-0.544048378937456,4.78471990596623,-0.11370  
5376621746,0.90947135024012,NA,NA  
"Vmn1r174",0.785347946627647,0.759296935681708,1.74520493698482,0.4350  
7608739266,0.663507199873816,NA,NA  
"Vmn2r94",0.877644496628758,1.35631390760249,2.11374629581295,0.641663  
529009684,0.521091674382021,NA,NA  
"Gm17271",0.70213440284282,0.434739644954715,3.72302789858482,0.116770  
450503464,0.907041960605069,NA,NA  
"Vmn2r75",17.6553730391401,0.390047179363136,0.608244720877171,0.64126  
6855223397,0.521349319749071,0.65472555947877,0.165200240787528  
"Gm17455",0.363690895888372,-0.644933510212631,3.93305287869779,-0.163  
977838616338,0.869748589869753,NA,NA  
"Gm6133",45.8669290722581,-0.020436194544348,0.658933992311686,-0.0310  
140238366719,0.975258355648817,0.984546184275605,-0.000318282911125651  
"Gm17511",0.414595265926162,-0.193672283931258,3.77041377860114,-0.051  
3663208612377,0.959033621388845,NA,NA  
"1700091H14Rik",0.627145201275479,2.53609412033159,4.35431961938926,0.  
582431778558163,0.560275881431973,NA,NA  
"Gm4613",0.426732949589963,-0.654641005890224,3.18640466463731,-0.2054  
48169579785,0.837221988950346,NA,NA  
"Gm2840",0.221787968205762,-0.0457774532302773,4.78471990596535,-0.009  
56742591623895,0.992366415032498,NA,NA  
"Gm5656",0.268529148175278,2.16132862279237,4.75529540823855,0.4545098  
5422438,0.64946190096797,NA,NA  
"Gm3675",0.116779199695001,0,4.78471990596232,0,1,NA,NA  
"Gm17416",7.3749836160375,-1.28067094763249,0.964130612573561,-1.32831  
685969807,0.184073452322898,0.312231392216994,-1.49071471738444  
"BC035947",3568.92284585615,1.98853400385087,0.619187549012273,3.21152  
130242764,0.00132034181174822,0.00727437825528873,9.7903422152629

"Gm17415",0.337289071717324,-0.537976986799748,3.89441223110681,-0.138  
140739827856,0.890129188682352,NA,NA  
"Gm3486",0.194173698613775,-0.917632882424805,4.78271639669383,-0.1918  
64372944869,0.847848445197244,NA,NA  
"Sfta2",12.6375569584422,0.455247150459931,0.620880898400496,0.7332278  
24583962,0.463419487391121,0.60251166438802,0.230650173839155  
"Gm3424",1.09580591080919,1.36613116597493,3.34448911363907,0.40847230  
161514,0.682926961655765,NA,NA  
"Rps11-  
ps1",29.0877717618442,0.673810135179146,0.598442562337572,1.1259395263  
3847,0.260191117283383,0.401615453197546,0.614690190422632  
"Gypc",474.378741151765,-2.50467451362079,0.474613404303534,-5.2772940  
9011582,1.31105390715898e-07,5.61822617182107e-06,-30.2802489362173  
"Aadacl2fm2",0.120024854922605,0,4.7847199059602,0,1,NA,NA  
"Gm9602",0.120701025406302,-0.999956691173236,4.78169649435351,-0.2091  
21740025541,0.834353203805696,NA,NA  
"Gm6576",0.325888092114222,-1.09764439406247,3.17443620222013,-0.34577  
617067711,0.729510934825848,NA,NA  
"Gm8265",0.0721532113593248,-0.544048378937457,4.78471990596623,-0.113  
705376621746,0.90947135024012,NA,NA  
"Prlh",1.95611968227838,0.0989701414343658,1.34411705079056,0.07363208  
53724423,0.941303139991934,0.963591569463051,0.0036705805835111  
"Gm17158",0.220934797106265,0,4.78471990595636,0,1,NA,NA  
"Snrpe",2058.29841979361,0.289384478748823,0.229194290402146,1.2626164  
3883479,0.20672705719439,0.339746182543081,0.312406884061925  
"Gm8893",13.4504119552863,-1.64151487170019,0.805259177607091,-2.03849  
259635651,0.0415006944237799,0.100681913633801,-3.76857195290152  
"Olfr753-  
ps1",1.36140615039079,1.30317585199893,2.00222549250857,0.650863679877  
632,0.515134488792923,0.64885724491729,0.563679003619669  
"Gm17137",0.208987345851815,-0.54485924921566,4.78471990595393,-0.1138  
74847415343,0.909337004697896,NA,NA  
"Vmn2r6",20.2255317711753,0.438082666438327,0.423221773347525,1.035113  
72530118,0.300615803429848,0.445260326289515,0.354451005353154  
"Gm17571",0.24675097778079,-0.0631938991100017,4.7847199059574,-0.0132  
074395893728,0.98946229422481,NA,NA  
"Gm5611",0.248588592571134,1.37264347048614,4.03771509979004,0.3399555  
03685119,0.733890037213643,NA,NA  
"Vmn2r60",104.645152478643,0.348684166317342,0.392881619254223,0.88750  
4401400153,0.374807397591208,0.51989433090152,0.228084668362197  
"A930033H14Rik",139.513775267506,0.0426338824269354,0.344084308401269,  
0.123905337691878,0.901390226652274,0.939654974297799,0.00265364026754  
02  
"Gm17060",0.303427801045336,1.35212525270546,3.86877340702493,0.349497  
143009271,0.726716115307928,NA,NA  
"Gm20721",85.5856178528181,-0.528916203465136,0.613492333315094,-0.862  
139874849065,0.388610551010423,0.532848577757048,-0.332962264989283  
"Tex9",850.664576694861,0.585363651605771,0.264885713301079,2.20987249  
297369,0.0271140127668194,0.0728796554904114,1.53303564940468  
"Gm8356",0.417196922199262,0.38561665194151,2.65059340084267,0.1454831

4042392,0.884329426121649,NA,NA  
"Gm8126",446.471711747101,0.0229375529862045,0.621610147132569,0.03690  
02229001785,0.970564562021124,0.981997189055466,0.000416702696839846  
"Gm6189",0.839991313906614,1.35435556037944,1.89096600431784,0.7162241  
71818478,0.473852939897372,NA,NA  
"Zfp712",103.527798184248,-0.180001320414968,0.232375784667798,-0.7746  
13071978632,0.438568330691,0.580648378083383,-0.0978505009735877  
"Vmn2r120",633.00087392547,0.691079584662345,0.29451691479409,2.346485  
2100108,0.0189514183340357,0.0551679239589473,2.00231573186491  
"Prss47",0.0789318165836824,0,4.78471990596069,0,1,NA,NA  
"Zfp493",121.651576231006,-0.346979836522579,0.181485839388902,-1.9118  
8380146311,0.0558910998171104,0.126584349428972,-0.717154025683219  
"Gm17030",0.0785241885886732,0,4.78471990596623,0,1,NA,NA  
"Vmn2r45",1.26337508135619,1.98404085942435,2.68464305815214,0.7390333  
8970879,0.459886722461915,NA,NA  
"Gad1-  
ps",3.54958606388323,-0.384800447789071,1.11622539164386,-0.3447336448  
97988,0.73029462191001,0.823127610729023,-0.0748991117355502  
"Gm765",0.294249264395698,-2.18425768375249,4.74476312314856,-0.460351  
260339219,0.645264113023419,NA,NA  
"Gm5067",0.313764919340756,0.887294118457697,4.7847199059486,0.1854432  
72730462,0.852881370237858,NA,NA  
"Gm17082",7.64948486111079,0.659185769335016,0.505627120351752,1.30369  
939190848,0.192336096850039,0.322290238602789,0.746397877374782  
"Olfr111",3.27525630445485,-1.17916658555096,1.16358189553507,-1.01339  
371992268,0.310872137888889,0.456120471409253,-0.925643780018209  
"Atp6v1fnb",0.551298985532393,2.30537989779638,4.29431461841857,0.5368  
446661799,0.591374915521597,NA,NA  
"Gm3667",17.8018251108091,-1.91057556984306,0.673899589859414,-2.83510  
421818425,0.00458107385318725,0.0185591455059297,-7.61706852875574  
"Trim43a",6.76676570753099,0.546484165935145,0.615957222096479,0.88721  
1232096809,0.374965186318373,0.520064817387654,0.357292345760996  
"Apolo1",399.242178968454,-1.60828834705911,0.499081189741354,-3.22249  
842333788,0.0012707786512632,0.00706922743005132,-7.96425045554632  
"Cyp4f40",1.02582392887727,-3.18753017547697,2.21987368384873,-1.43590  
610522963,0.151029061007574,NA,NA  
"Gm8237",9.55413426791922,0.131524822953726,0.763611036612292,0.172240  
599791783,0.863248380788973,0.913818173007405,0.011853498788285  
"Gm2959",0.0890967035576327,0,4.78471990596491,0,1,NA,NA  
"Rps27",7473.43095279594,-0.00197126974172547,0.337893746666683,-0.005  
8339929672331,0.995345173488498,0.996955214269288,-6.01125011641409e-0  
6  
"Gm17079",0.233558399390003,0,4.78471990595561,0,1,NA,NA  
"Gm6871",0.466697356976967,-0.320492639376744,3.06431938830016,-0.1045  
88523180845,0.916702321930725,NA,NA  
"Vmn2r63",11.3536891754707,0.934782640722756,0.698857067793721,1.33758  
773260153,0.181030865577598,0.308813632286264,1.09838578935959  
"Rpl31-  
ps4",0.125558793514292,-1.03498639904526,4.78089210794988,-0.216483948  
115925,0.828610536062342,NA,NA



"Vmn2r56",90.9599405244634,0.876487645982899,0.413120101208662,2.12162  
914227259,0.0338688931644337,0.0863236181594938,2.14708975286882  
"Ighv1-13",0.111923838333244,-0.538190344109746,4.78471990596623,-0.11  
2481055252296,0.910441990129039,NA,NA  
"Gm9597",1.0517049009731,-0.553001159999789,3.27594540054364,-0.168806  
586308801,0.865948777551194,NA,NA  
"Gm17377",0.226334855555154,-1.2736652579805,4.77324368133539,-0.26683  
4325463177,0.789596724236084,NA,NA  
"Gm3141",27.8411008080689,-1.30745280066727,0.668108841699083,-1.95694  
581341306,0.0503538394459652,0.117075979193588,-2.80439756000713  
"Gm8046",1.61785472188798,1.60780222468459,1.4634087988352,1.098669234  
43696,0.271912366661373,0.414490448374908,1.41600001844898  
"Klhl33",126.914625797599,-0.650106496919326,0.331025772932409,-1.9639  
1504854841,0.0495399443970446,0.115541846393968,-1.40300946372614  
"Samd15",26.0190634114144,-0.102362073635908,0.42280047809128,-0.24210  
4914587652,0.808698870180247,0.878121647011892,-0.0133040135342031  
"Gm4450",3810.36271306792,2.22962224484178,0.733362510244061,3.0402730  
0781951,0.00236363787019438,0.011345694533001,9.98629284962593  
"Olfr1344",0.262310360101335,-0.542795148839119,4.78471990596602,-0.11  
3443453223315,0.909678991350649,NA,NA  
"1700092M07Rik",5.14089214904741,0.0402658431685562,0.638433357796405,  
0.0630697670741022,0.949710948733291,0.968767169089574,0.0012776744846  
9731  
"Myl6",39650.7818881185,-0.111294277766464,0.197613576124839,-0.563191  
456522984,0.573304519880748,0.699473845731483,-0.039779565965708  
"Heatr4",0.36816271930589,0.718111743225287,3.83998330727152,0.1870090  
79405488,0.851653514196227,NA,NA  
"Rps13",10588.364199556,-0.194425938327193,0.194804955744456,-0.998054  
37487042,0.318252992476638,0.463296610448278,-0.149588945475869  
"A530084C06Rik",32.6386165611085,0.0366810308957954,0.35843294341832,0  
.10233721974876,0.918489013290667,0.95000541340214,0.00188128189659225  
"Vmn2r40",0.178411379660983,1.05080222703386,4.76399320534436,0.220571  
73084442,0.825425914450033,NA,NA  
"Trav9d-4",0.48340400975649,-2.4606027856927,4.57197291465247,-0.53819  
2774022535,0.590443968196804,NA,NA  
"Gm3239",1.45288574546051,-1.62431172134237,3.03864706620378,-0.534550  
964937051,0.592960398679443,0.715801307449027,-0.54309293510932  
"Olfr733",1.50611375091605,-4.45728667639979,2.51240517027657,-1.77411  
140891305,0.0760447240076415,0.159809598618809,-8.17364830993842  
"Hspa1b",2943.57928248503,-0.168113494373644,0.348904211577341,-0.4818  
3280337497,0.629924724418126,0.74573602165784,-0.0493217421490059  
"Phf11",7.8499642820262,-2.06439383935017,0.631986634860535,-3.2665150  
2654916,0.00108880029265367,0.00628089588939682,-10.466977693002  
"D6Ertd527e",8.49670901249914,-1.88674201930565,0.774148256025957,-2.4  
3718435663877,0.0148021306911426,0.0457605746338827,-5.81933949234337  
"Olfr110",0.529819114440695,-2.10750501248442,2.62216776480434,-0.8037  
26230171881,0.421555101993095,NA,NA  
"Pabpc4l",28.2477947740222,-1.38037570065185,0.411612907142091,-3.3535  
7729726231,0.000797741285286806,0.00495361770080323,-7.3265333092841  
"Synj2bp",3300.45205738391,0.240358192159956,0.0982632311783067,2.4460

6440555375,0.0144425198376578,0.0450344237637378,0.745189259412379  
"Gm17147",9.00377368532072,-2.95538358873216,0.950969906760509,-3.1077  
5721473638,0.00188512863057548,0.00954211787096594,-13.7485621355175  
"F830016B08Rik",116.444792162036,-0.270885075909308,0.484522605496871,  
-0.55907623883001,0.576109690324638,0.701661107332962,-0.0959758676376  
407  
"Ccdc71l",862.046233777158,-0.547042774690435,0.173069582372231,-3.160  
82564707343,0.00157322637762845,0.00834460498122947,-2.61822333791643  
"Vmn2r77",2.57551732546876,0.505776204622899,0.973955979984433,0.51930  
0887326533,0.603550934700437,0.724786357979485,0.162798408292714  
"Gm17097",1.5549817812813,-0.29197238322662,1.3552596766953,-0.2154364  
86635958,0.829427025579721,0.891126743704728,-0.0336552515906987  
"Lrrc32",1748.23818639361,-1.27447046423199,0.249401173362785,-5.11012  
216601771,3.21950562509908e-07,1.13927260758951e-05,-14.5067052642451  
"Gm17655",128.995527416283,-0.407990343703112,0.335783009563193,-1.215  
04165512677,0.224350204475128,0.360565470396971,-0.416183495125525  
"Vmn2r116",92.012191801785,0.525362982243885,0.257807934094222,2.03780  
765743182,0.0415691722790571,0.100784799096452,1.20558602204142  
"Olfr718-  
ps1",215.935941450411,-0.00285661942600421,0.268544503601775,-0.010637  
4153545898,0.991512730584298,0.994470947578839,-1.58382241999808e-05  
"Gm17042",0.467876581041155,0.380438577697893,3.66345969652555,0.10384  
6803080351,0.917290923741952,NA,NA  
"Gm6153",0.933881119202555,3.6342182653276,2.02721390540862,1.79271573  
445282,0.0730183893004407,NA,NA  
"Gm20458",13.6193270497354,-7.01347476699153,2.00464589125719,-3.49861  
030198861,0.000467689596496577,0.00327198125313608,-40.1336245902913  
"Tcerg1l",33.2114501086713,1.15003462878798,0.443949817153296,2.590460  
86821762,0.00958475179861159,0.0327176979288041,3.93293342026919  
"Gm7244",0.249491397669739,1.07236179920964,3.97289576571185,0.2699194  
39735791,0.787222231329149,NA,NA  
"Vmn2r69",0.697719385541114,-0.0222310761899956,1.79127375442559,-0.01  
2410764203445,0.990097897053606,NA,NA  
"Vmn1r1",8.54251602846113,0.437250338894337,0.575116809948884,0.760280  
922641088,0.44708668275054,0.58805289667229,0.232152984314478  
"Gm5244",0.862711340417735,-2.08441139642981,3.12036454754113,-0.66800  
2524920473,0.504131980765368,NA,NA  
"Fam71a",0.14728986473751,0.4.7847199059615,0,1,NA,NA  
"Gm7502",7.60422584882938,0.751064664079897,0.67189932341301,1.1178232  
1831306,0.263642503059092,0.405605324654762,0.677741750136788  
"Gm3115",0.108229817038987,-0.909962624367568,4.78339755770097,-0.1902  
33534509919,0.849126134161093,NA,NA  
"Gm10722",0.0839785818268104,-0.0698281583628248,4.78471990596623,-0.0  
145939908155864,0.988356093377949,NA,NA  
"Gm17660",0.47990952285939,-2.28468526238201,3.71586310883732,-0.61484  
6455712648,0.538656126439908,NA,NA  
"Gm17661",3.94957832198062,-0.77495580021449,1.0857406900812,-0.713757  
720691606,0.475377007513126,0.61298200466179,-0.379278634988127  
"Glyatl3",0.10104575754398,0.4.78471990596623,0,1,NA,NA  
"Siglec15",2.05896588672185,-1.01501819792446,1.28893131457221,-0.7874

88197741042,0.430996134665419,0.57330895304314,-0.564685604407331  
"Vmn2r14",2.70205076000261,1.66143237307616,0.99844637730135,1.6640176  
2863496,0.0961089065410728,0.191373719335972,2.74722348183574  
"1700030C10Rik",15.1228604556287,0.403746411771237,1.03173779200748,0.  
391326570470641,0.695555861266724,0.797245792897453,0.0914858079226654  
"Vmn2r115",201.423735704299,-0.0826696239902972,0.249063892435958,-0.3  
31921352315467,0.739948646751668,0.830551995530714,-0.0153488346066611  
"Gm21292",0.346117571516189,1.13265877285717,4.73855753588233,0.239030  
288074,0.811082096880214,NA,NA  
"Gm4535",0.764261881894469,-0.651889872407997,2.23680120019749,-0.2914  
38448955787,0.770716012107813,NA,NA  
"Rpl6l",1.55938820862745,1.06989074818001,1.57493098920412,0.679325478  
712351,0.496931656150577,0.632659055280703,0.48982125447439  
"Kcnmb3",1.39347030685689,2.84602423132351,1.5245402813778,1.866808155  
93237,0.0619283831416141,0.136727009604437,5.66293070821723  
"Mrto4-  
ps2",1.28327592911125,-1.07180402971062,2.1086792378941,-0.50828215617  
1373,0.611255482030965,NA,NA  
"Gm2832",0.374601417569738,0.410555385852548,3.82181050189916,0.107424  
317780416,0.914452363332178,NA,NA  
"Ccdc152",45.6373695404047,1.20298093590897,0.662654894978459,1.815395  
83427973,NA,NA,NA  
"Gm8247",0.14751245096507,1.8946624849735,4.78209019182113,0.396199655  
166262,0.691957745677035,NA,NA  
"Gm7945",14.6302532971342,-0.309383358719663,0.680860118973172,-0.4544  
0076470664,0.649540402068302,0.761147830971077,-0.0844392826831033  
"Lgals1-ps2",0.63176100775281,0,4.78471990594188,0,1,NA,NA  
"Gm17124",0.219119695940912,-1.44728713313833,4.7667913472838,-0.30361  
8729601625,0.761418380649887,NA,NA  
"Phf11c",223.167400004607,0.385727303688575,0.245103534146284,1.573732  
11705043,0.115549393490937,0.219943244534619,0.584139930279089  
"Gm3182",0.412156217569207,3.28449841464129,4.69727598334941,0.6992347  
10986529,0.484405361445412,NA,NA  
"Vmn1r224",69.4460898550801,1.23797728779267,0.410992103740515,3.01216  
805998366,0.00259388948252958,0.0121663837215208,5.45833912120842  
"Serpine3",0.886057640320581,2.02814322090302,1.53243275496585,1.32347  
942468001,0.185675994245162,NA,NA  
"Gm3962",0.590194067341922,-0.549480174665733,2.61121616834172,-0.2104  
30749214718,0.833331495485977,NA,NA  
"Gm5141",189.451406934428,-0.702112804650953,0.318940260793731,-2.2013  
928342055,0.02770822585622,0.0740364568469885,-1.8277384009964  
"Gm3278",1.86480956209437,-1.98880921601261,2.3796268129656,-0.8357651  
73419807,0.403287022459259,0.547163757839443,-1.19926617104794  
"Gm17208",1.69622136755874,1.81335024644027,1.84719321993602,0.9816787  
04138531,0.326258160054454,0.471178550088271,1.36457900823127  
"Gm3084",0.185034860161786,-1.51600384949628,4.76407540962271,-0.31821  
5754191082,0.750321283294368,NA,NA  
"Gm3755",26.4430192315414,0.858651908266191,0.504626590817528,1.701558  
98220726,0.0888380722008699,0.180208565519409,1.47142060085881  
"Gm20390",2427.40472188155,0.566746317430792,0.424587225265272,1.33481

716760721,0.181936193254584,0.310005409077853,0.663753752939219  
"H1f11-  
ps",1.43506644973092,-0.585805461135511,1.40279609653961,-0.4175984397  
02365,0.676240737764709,0.781816893266309,-0.144187061796684  
"Vmn2r76",157.809938157714,1.08245762377188,0.409755356767663,2.641716  
83394403,0.00824869877875077,0.0291206099561982,3.82790475567341  
"Vgll3",369.403057276571,-1.73302287555087,0.341777702073346,-5.070614  
21806551,3.96533848492041e-07,1.32390701676332e-05,-19.4658991140291  
"Speer4e",3.62258519758983,3.77021505089016,1.04969149329792,3.5917363  
1010852,0.000328482130355455,0.00248534907942207,22.6112696569225  
"Vmn2r110",1.45044231097698,-0.2356648262803,1.84201044511104,-0.12793  
8919622193,0.898197310713687,0.937479319324205,-0.0152146580513398  
"Smim13",666.175665270453,-0.430342331718823,0.194617870028897,-2.2112  
1694351565,0.0270208176194056,0.072719379150196,-1.12799066955913  
"Gm6682",0.867929447476649,-1.8810450282816,2.75236115342412,-0.683429  
58043186,0.494335433672553,NA,NA  
"Gm6673",0.546368954006363,0.0694968105545601,3.12860155900801,0.02221  
33784835789,0.982277745737677,NA,NA  
"Gm3248",16.489144301105,-1.07751329761297,0.560836182062711,-1.921262  
09412875,0.0546986733970115,0.124403911570621,-2.24577654916561  
"Gm1818",0.226312406602595,-0.546668538650257,4.78471990596566,-0.1142  
52986463986,0.909037249739833,NA,NA  
"Gm8065",0.130246627347867,0,4.78471990596148,0,1,NA,NA  
"Gm8439",3.70778578831003,-1.78685300386592,1.00257798582276,-1.782258  
36706314,0.0747071085723979,0.157747368739941,-3.29988947114932  
"Speer6-  
ps1",52.116893315278,0.0431426042157742,0.412479825453328,0.1045932468  
77854,0.916698573524366,0.948913045812766,0.00226231670076354  
"Spata31d1b",1.81680833325004,0.0501402385175575,1.46980020395267,0.03  
41136423731046,0.972786529776769,0.983326857669524,0.00084304311683421  
6  
"Fth-  
ps2",33.2018229660401,-0.370742069438099,0.38527543422018,-0.962277987  
405303,0.335909983336946,0.480478883292215,-0.271743555712447  
"Gm5415",1.32297347659441,1.49034958138904,1.28097473006627,1.16344963  
44139,0.244647121496073,0.383759418739375,1.42736656817168  
"Eid1",2837.41027780829,-0.453069450379405,0.200882614998199,-2.255394  
02891319,0.0241086072113551,0.0664503284431724,-1.22840745051099  
"Col6a5",432.602180776607,-2.32658940295677,0.643511232613737,-3.61546  
043805157,0.000299814261160685,0.00230875926702648,-14.1248289911587  
"Vmn2r92",59.4171186070673,0.167685806391314,0.253452686081245,0.66160  
5954878544,0.508223790184771,0.642747349143046,0.0741177228980095  
"Speer5-  
ps1",17.9592670106391,0.341398891714912,0.726180261676304,0.4701296767  
92415,0.638262372719974,0.752408690646557,0.0971196651620911  
"Gm5277",0.391962760292944,-1.92072258074339,3.12922445211171,-0.61380  
1473859513,0.539346523202788,NA,NA  
"Gm7701",23.8850196279299,0.638477837529133,0.601647332098772,1.061216  
10362982,0.288591702610541,0.432576953989877,0.535041261086984  
"Gm17040",25.4997232863555,0.681403782006853,0.481627884221346,1.41479

304735125,0.157129183220576,0.27781146304269,0.872750540047406  
"Gm17711",0.636598749505527,1.07131191058523,3.12680150920438,0.342622  
295477217,0.731882626874286,NA,NA  
"Vmn2r83",1.32859413994877,-0.0675542819069142,1.57539374042259,-0.042  
8808875988001,0.965796484221898,0.979307288437181,-0.00141254691470093  
"Vmn1r18",187.305194976748,0.454268841334308,0.237530392356559,1.91246  
61767594,0.0558164269225277,0.126473990951243,0.939300131302163  
"Hist1h2a1",0.155221657132113,1.37958490900916,4.78471990596623,0.2883  
31383262144,0.77309308634787,NA,NA  
"Gcnt4",182.83359574839,0.509180067873577,0.410502392528801,1.24038270  
456086,0.214833875052693,0.349651994639183,0.53505503073729  
"Gm9252",0.162036551369418,0.4.78471990595057,0,1,NA,NA  
"H4c14",13.6039040225114,-1.04732138161516,0.62803771502933,-1.6676090  
5683228,0.0953933591843034,0.190532648778483,-1.73638733378681  
"Vmn2r117",18.8084507651652,0.864490039579196,0.509370063863111,1.6971  
7480651066,0.0896636166797649,0.181543218901563,1.47504610015559  
"Gm6728",0.326063064836922,-1.07678031789381,3.90767081298463,-0.27555  
5534083327,0.782889466408994,NA,NA  
"Gm17150",0.302783738822172,0.377821921415992,4.78471990595967,0.07896  
4271439461,0.937061041553408,NA,NA  
"Ak9",18.9992485405559,0.00776388560854841,0.390169316800343,0.0198987  
600363289,0.984124134297825,0.989758723399133,7.992205408992e-05  
"Gm3164",8.41402891657241,-1.25975909659569,0.921709723270815,-1.36676  
337982555,0.17169948458408,0.296737861232086,-1.53048907653473  
"Gm17450",0.0886915477092957,-0.544048378937457,4.78471990596623,-0.11  
3705376621746,0.90947135024012,NA,NA  
"Gm4202",1.15604771137921,-1.23056646181973,2.51967667988661,-0.488382  
684827288,0.625278804165863,NA,NA  
"Gm17228",0.51275269852271,-1.52479073915609,2.739347289051,-0.5566255  
67430089,0.577783281442594,NA,NA  
"Gm10269",5.51223461934788,0.194065877125286,0.758207610762821,0.25595  
3480775588,0.797986757961915,0.871026468495853,0.026797181814122  
"Vmn2r11",2.72245012347249,-0.205905046304728,1.2584683828794,-0.16361  
5589478389,0.870033771467307,0.918485014358499,-0.0175080422159402  
"Otogl",9.8333434798178,-6.74434085613054,1.84526779624974,-3.65493879  
524561,0.000257243339774142,0.00205142357419887,-41.7422180838929  
"Gm7808",0.899991882183399,-0.0994243787596807,1.54076834810965,-0.064  
5290895816124,0.948548945236717,NA,NA  
"Gm17084",82.4680025560194,-0.231676348885727,0.264796417885583,-0.874  
922518724681,0.38161606547056,0.526519675475409,-0.148612634672917  
"Gm3739",28.5155822520849,-1.83376983484803,0.614267102142255,-2.98529  
715892771,0.00283302960893095,0.0129405701951478,-7.97210883970517  
"2610021A01Rik",546.292884769466,-0.356177344147708,0.211350735478437,  
-1.68524298409194,0.0919417010512963,0.185136764132828,-0.600750243635  
772  
"Catspere2",81.114641369336,0.697642354928963,0.211163037753728,3.3038  
090489236,0.00095380774824424,0.0056612917732926,3.60967353014767  
"Gm5799",94.6363159118404,-0.32809821659736,0.734529675886835,-0.44667  
7959200532,0.655107598056483,0.765142443207458,-0.0878296819287018  
"Gm10039",1.72779768221686,3.40607328141215,2.60215113666621,1.3089452

1590929,0.190552908788275,0.320265547414343,3.87817135889898  
"Gm6586",0.131375587390002,0,4.78471990595286,0,1,NA,NA  
"Triml2",4.87660518220395,2.28195318572058,0.745156111089805,3.0623827  
0311328,0.00219582515593572,0.0107384496840819,10.3462035707666  
"Vmn2r97",1066.61293361512,-0.226214867154245,0.310744223024457,-0.727  
97770768675,0.466627232568796,0.605337893480938,-0.113552731940654  
"Gm8398",0.263007883263616,-0.819520603436638,4.78275603068931,-0.1713  
49029341671,0.863949330639435,NA,NA  
"Mpc1-  
ps",0.223874463509632,0.0969728691017867,4.78301816496934,0.0202744095  
374784,0.983824469821391,NA,NA  
"Vmn2r118",0.0868903154092203,1.37631162641162,4.78471990596623,0.2876  
47271618857,0.773616755883718,NA,NA  
"Gm17194",0.125105613469391,0,4.78471990595343,0,1,NA,NA  
"Vmn2r87",1.29130939937223,-1.55316939953899,1.68084000389757,-0.92404  
35710344,0.35546363104358,NA,NA  
"Lamtor3",2060.47941802208,0.0251880117701841,0.112349647590129,0.2241  
93064334963,0.822607079988104,0.886241178340593,0.00304185933617085  
"Zfp422-  
ps",0.193328978549597,-0.544106123424044,4.78471990596623,-0.113717445  
141476,0.909461783008449,NA,NA  
"Clndn20",4.30944819552295,-0.152444083429043,0.795168485258553,-0.1917  
12934120465,0.847967073956504,0.902821162359775,-0.0155844796144527  
"Olfr102",305.590749277791,1.11945377970323,0.30458388183307,3.6753546  
2797982,0.000237519257374809,0.0019328674792546,6.99518752028814  
"Gm17195",13.1197180820614,-0.82521283887456,0.65519127416043,-1.25949  
912860484,0.20785010477451,0.340989595531627,-0.887849227936737  
"Tma7",5053.24527698098,0.288253013491571,0.167323415716942,1.72272967  
448383,0.0849374214420898,0.174161825583397,0.503800078894888  
"Vmn1r9",54.5428177810941,0.750208017413957,0.436456781655173,1.718859  
80226713,0.0856399031566859,0.175142315056541,1.30697970386209  
"Gm6548",681.908106859753,-0.417981554696206,0.137456138311023,-3.0408  
3586103981,0.00235922404366914,0.0113300863062712,-1.87268007876883  
"Gm6811",0.643399080156194,-0.671568802488261,4.45278522510451,-0.1508  
19940450305,0.880117755991328,NA,NA  
"Gm8711",0.802204192561842,3.0016269438101,2.81366392276318,1.06680365  
040268,0.286060509843884,NA,NA  
"Serpina3e-  
ps",0.344885451046996,-2.02322682004929,4.7487952504248,-0.42605054826  
6596,0.670071013217596,NA,NA  
"Gm6665",0.104511347015237,0,4.78471990596623,0,1,NA,NA  
"Gm8108",49.7270942416803,-0.930408254520443,0.505616561419586,-1.8401  
4592383643,0.06574681658684,0.142970142356053,-1.80975520648378  
"Gm8206",50.4451714343297,-1.25053716796844,0.574900144793502,-2.17522  
50008871,0.0296132595570845,0.077879597362292,-3.19211025584995  
"Vmn2r3",24.3763504715123,0.33181366346879,0.443509300548044,0.7481549  
1593698,0.454366721110622,0.594659842140885,0.172465371281162  
"Gm6211",192.817950461435,0.816173272549516,0.347228755708525,2.350534  
79624435,0.0187464547948454,0.0546855738464835,2.37192631159166  
"Cyp4f17",842.716861395194,-0.247827592889009,0.26199364458379,-0.9459

29788803518,0.344184398535691,0.488705753178626,-0.177443243607537  
"Gm17067",4.52618215412163,0.827539312533624,0.712063247593456,1.16217  
107866533,0.245165979944629,0.384344188693584,0.791306995895851  
"Olfr93",1.23356396747151,2.00130662933157,1.86213215428085,1.07473931  
145584,0.28249145822066,NA,NA  
"Gm17349",6.03152312611244,-0.407800534984468,0.711248425382154,-0.573  
358787775674,0.566401788498614,0.693801532472899,-0.149079370647165  
"Gm8256",0.821860291958073,-0.591999830407105,3.442500907335,-0.171967  
951888036,0.863462724303553,NA,NA  
"Gm17046",0.13468145834248,1.36590076811901,4.78471990596623,0.2854714  
16292482,0.775283000194679,NA,NA  
"Gm17657",4.95049531883767,0.98146460251392,0.896220655482763,1.095114  
91004996,0.273466297343059,0.416370909385832,0.859938484413432  
"Gm3752",4.38658913450103,-2.43482444683129,1.3187836827044,-1.8462652  
205692,0.0648537050689509,0.141524067312189,-4.76077691000403  
"H60c",54.0910869827072,-3.19408328022894,0.746861191107049,-4.2766759  
3156695,1.89704645919132e-05,0.00027748395994983,-26.1587353304493  
"Vmn2r23",29.0829768275674,0.339303223684037,0.358599002278266,0.94619  
1209480121,0.344051068928687,0.488655425792926,0.242974254221621  
"Lsm5",645.717903339577,-0.0110703586991403,0.222977674448392,-0.04964  
78345938732,0.960403027113881,0.975931450625501,-0.000269706374621039  
"Vmn2r95",83.0528989139511,0.690612292439758,0.43618397093181,1.583305  
06956599,0.113351948002088,0.21690965862149,1.05544503979123  
"Vmn2r13",18.9091649133631,0.902542051475372,0.361883217191301,2.49401  
466716337,0.0126307325128068,0.0404258080326176,2.89561382716255  
"Akain1",0.460951684843375,0.834169131954294,3.76182624846463,0.221745  
789640007,0.824511782364552,NA,NA  
"Gm3756",2.16047610154881,1.34512342203936,1.37347415602696,0.97935837  
8267846,0.327402934894242,0.472132418058422,1.00950945990189  
"C2cd4d",19.9070747683953,1.56947436671639,0.589607108566323,2.6618986  
5066704,0.00777012701380501,0.0278445022082651,5.62047563503596  
"Phf11b",403.752736249567,-1.09872837421521,0.474187789256888,-2.31707  
437244864,0.0204996807677509,0.0585387779158768,-3.11826350364357  
"Apol11a",0.146429860481607,0,4.78471990596489,0,1,NA,NA  
"Vmn1r57",0.0721532113593249,-0.544048378937457,4.78471990596623,-0.11  
3705376621746,0.90947135024012,NA,NA  
"Vmn2r105",0.207182695437178,-0.995411718075361,4.78198128030577,-0.20  
8158848754781,0.835104938696386,NA,NA  
"Gm17129",1.62348218502169,-4.25933105537694,2.63287740501116,-1.61774  
758189278,0.105717007108212,0.205510488992613,-6.73936151027443  
"Vmn2r96",4.61376024014772,-1.94472543136364,1.15828831582809,-1.67896  
490432375,0.0931588838128808,0.186854430262684,-3.26213186000997  
"Klhd7b",0.228836970840262,-0.543587050032139,4.78471990596623,-0.113  
608959503423,0.909547784684165,NA,NA  
"Trgc3",0.978074990263112,-2.06842908230931,3.11489615033547,-0.664044  
315598302,0.506661948166132,NA,NA  
"Gm17359",0.444937765814894,1.04574252072104,3.1484914933241,0.3321408  
11858115,0.739782934273827,NA,NA  
"4930433I11Rik",0.0810182756847091,0,4.78471990596022,0,1,NA,NA  
"Apol11b",7.12130951534187,-0.181348651825951,0.781977667917424,-0.231

910269648648,0.816607707934418,0.882704129576743,-0.0226260023780329  
"Gm17669",0.281989778526742,-1.05405780473211,4.77996648333004,-0.2205  
15731314875,0.825469522081482,NA,NA  
"Eif3s6-  
ps2",1.08397763407855,1.58521229477916,2.71876996184199,0.583062310172  
488,0.559851354743827,NA,NA  
"Gm6526",4.3596112390358,1.06365601105049,1.03771542717534,1.024997781  
85409,0.305364234289394,0.449993105862309,0.849353806612489  
"Gm7876",0.2428721367569,-1.90670920094254,4.75174185046922,-0.4012653  
17212942,0.688224795737349,NA,NA  
"H2-  
Q2",94.8566529834241,-0.122856782079995,0.358787373870788,-0.342422256  
264348,0.732033141656918,0.824515175092518,-0.023706411737861  
"Sec14l5",12.8831646040759,-0.123454498834681,0.441544912747043,-0.279  
596696215152,0.77978694209033,0.857497366018682,-0.0189795454777059  
"Gimd1",1.27181955129326,0.220331245668668,1.29235780786524,0.17048780  
4791939,0.864626524331994,NA,NA  
"Siah3",1.99640201083479,-2.54228472982523,1.55557669465652,-1.6343036  
8850221,0.102195099585527,0.200644451889901,-4.08347069732048  
"Gm8220",0.667176027999313,0.0201968266356588,3.05849935985825,0.00660  
350853779312,0.994731200782755,NA,NA  
"Gm17230",1.72632226912395,-2.9735104352056,1.67095136664197,-1.779531  
40621999,0.0751526806594453,0.158482259084779,-5.47754110432289  
"Gm17541",0.816893749535709,0.629003728190739,2.2944276586975,0.274144  
066301838,0.783973910510668,NA,NA  
"Gm8094",29.2687407305932,-0.903437603898197,0.753853615805402,-1.1984  
2577518579,0.230751303041472,0.367550764374039,-0.904245128516668  
"Vmn1r29",2.12758889601595,0.0633491085818449,1.30665777665794,0.04848  
17904990196,0.961332276451457,0.976507253256082,0.00150600474918848  
"Gpr62",7.46999283025143,-0.406185076051138,0.645459939320069,-0.62929  
5563221189,0.529155575479656,0.661588676543914,-0.167799624774723  
"Yy2",110.212142002527,-0.430087745280868,0.223702272504713,-1.9225899  
6954002,0.0545315646937884,0.124122437613076,-0.897372403555439  
"Gm5093",1.9725539330313,0.451929380170945,1.34163544734902,0.33684961  
2213159,0.736230271223379,0.827664773311431,0.0854811179826641  
"Gm3636",143.497959676262,-1.64841518093713,0.351712050973493,-4.68683  
167487305,2.77466988908687e-06,6.2041873276853e-05,-15.9693534387311  
"Gm3095",0.556055285679982,1.06380585566529,4.4452660307855,0.23931207  
902923,0.810863599785214,NA,NA  
"Zfp964",226.321291616255,-0.0963637939516244,0.1429037699649,-0.67432  
6464412332,0.500103782507912,0.635452821853325,-0.0436930236971605  
"Gm21293",2.20347948955433,0.880556084948716,1.34410053310668,0.655126  
654040859,0.51238621240802,0.646579034715141,0.383975143843115  
"Sco2",601.849934510976,0.735375191022355,0.197180644208522,3.72944917  
577551,0.000191898806642657,0.00164107146136778,4.71552422860565  
"Gm17022",0.118013433006149,0,4.78471990596623,0,1,NA,NA  
"Rp129-  
ps5",0.788123987224085,2.15709855592034,3.01092264931157,0.71642443435  
5215,0.473729311832371,NA,NA  
"Gm8425",0.367902170239352,0.402411285828203,3.79711701990951,0.105978



11016048,0.9155997199259,NA,NA  
"Gm8032",0.137986538933697,0,4.78471990596107,0,1,NA,NA  
"Gm3573",0.310355945649333,-0.886954524435779,4.78326315264579,-0.1854  
28753579065,0.852892757369948,NA,NA  
"Vmn2r18",3.6801720259523,0.0176255333040692,0.878179433339528,0.02007  
05375631983,0.983987103028342,0.989723009277618,0.000182074642746364  
"Cox16",1642.13310474548,0.446063815788708,0.217332453602313,2.0524491  
7818367,0.0401260293408522,0.0981460882231814,1.03544713898334  
"Vmn2r108",291.122280070632,0.829548294970088,0.331372727563538,2.5033  
6924547005,0.0123017126308623,0.0396985754512666,2.6764877798958  
"Inafm1",1606.19095167097,-0.205709155142529,0.186158266141199,-1.1050  
2294314721,0.269149647779386,0.411454078806846,-0.182681632042582  
"Ces2h",119.898808564636,1.99603169365884,0.999690146111554,1.99665036  
353785,0.0458631777110038,0.108722217508711,4.42911271615361  
"Gm8050",12.4167675270483,-1.54852749336489,0.652682794639091,-2.37255  
755182142,0.0176654108042512,0.0522450871710519,-4.57095803893448  
"Gm5778",0.501275447787429,-0.548691709905824,3.59137594910078,-0.1527  
80359862689,0.878571486447142,NA,NA  
"Speer4f2",2.05268652299553,0.962309810247546,1.14702803010828,0.83895  
9279972177,0.401492160384561,0.545487711182369,0.583231919770514  
"Gm4707",107.146909825434,0.396941794796367,0.668528766924829,0.593754  
247288809,0.552676494387547,0.682514811701318,0.15162027415997  
"Gm17177",8.68738955854558,-1.09706555591382,0.716632491362554,-1.5308  
6214919999,0.125803465661897,0.234706341352565,-1.59010893086113  
"Gm8251",18.6463354056844,0.710904615093436,0.566763789114085,1.254322  
57449732,0.209724781919152,0.343429394294081,0.759796181664859  
"Rpl36-  
ps12",6.27374085246825,1.25950137287775,0.783601955751066,1.6073229062  
7139,0.107983551978745,0.208807678455349,1.97280945786323  
"Vmn2r100",18.9865746066738,0.410975034679308,0.500608578119635,0.8209  
5084391681,0.411674268339365,0.555242335307695,0.241797416598336  
"Gm6257",0.123358006343051,0,4.78471990596547,0,1,NA,NA  
"Olfr732",0.275684292946662,0.787592820485807,4.73356337321494,0.16638  
4763103085,0.867854164102468,NA,NA  
"Vmn2r17",24.2634523493682,0.92346153233703,0.487404848279448,1.894649  
8698092,0.0581388032247342,0.130492734577629,1.88057190434966  
"Gm6337",0.225497214928629,-0.548980577149642,4.78471990596378,-0.1147  
36199388679,0.908654220425019,NA,NA  
"Ube2d2a",7088.49118891826,-0.1486088103434,0.141236093916754,-1.05220  
136172126,0.292707174885011,0.436631053164099,-0.12314717430399  
"Gm17019",4.99455061822725,3.62929376085152,1.11658836853074,3.2503417  
2228313,0.00115266411271005,0.00655336751672329,18.247276927035  
"Tnnc1",146.209919331873,1.96200242382226,0.408317022974074,4.80509582  
855879,1.54677402377637e-06,3.88146717060383e-05,19.9274940448294  
"Gm4353",0.439446558357628,-0.859686022610711,4.72268685417076,-0.1820  
33246996145,0.855556634441319,NA,NA  
"Gm6460",0.862861820145848,-3.26362634332252,4.24218493647582,-0.76932  
6748407572,0.441699361971573,NA,NA  
"Gm6395",1.36833591491113,1.23759659625746,2.03628196108448,0.60777270  
5307639,0.543338234490579,0.673734694895145,0.488750253410718

"Gm8267",0.141288982607259,0,4.78471990596053,0,1,NA,NA  
"Vmn2r52",15.1690446500231,-0.0812545735974228,0.501225767916446,-0.16  
2111724493318,0.8712178735144,0.919260030184738,-0.00684051765073402  
"Gon7",456.086554720184,0.331272102884182,0.175311841629908,1.88961623  
929269,0.0588093036913516,0.13155849052019,0.671920442397282  
"Gm8857",0.391015971330637,-1.15018254838936,4.77710700164378,-0.24076  
9685082118,0.809733626318622,NA,NA  
"Gm3646",0.183323691516246,-0.177460824965319,4.77866734503808,-0.0371  
360490596997,0.970376528848905,NA,NA  
"Gm7399",2.23170284335071,0.616915362800902,1.02568006246945,0.6014695  
86252464,0.547527262930635,0.677305327535943,0.240370649532382  
"Vmn2r114",355.929461792697,0.483088915179552,0.214499283867568,2.2521  
7029385427,0.0243115125018484,0.066905556917578,1.30650104956373  
"Gm17709",1.41974698480505,-1.34343843161591,1.87449314432186,-0.71669  
4235818042,0.473562783348151,0.611289450494687,-0.661219840881346  
"Gm9844",2.06763911509225,0.128001388349486,1.38512348738381,0.0924115  
35516773,0.926371074630854,0.954827720620495,0.00591678123552021  
"C2cd4b",2.37084567614153,-0.336344656555504,1.19569026244714,-0.28129  
7479053756,0.778482243706982,0.856835833350197,-0.0519682558272857  
"Rps2-  
ps10",222.494084790163,0.627914896067167,0.260274127409331,2.412513692  
07224,0.0158429423682709,0.0480984316631885,1.90541133635257  
"Vmn2r78",1.37904227939869,-0.396810133802608,2.17379773881028,-0.1825  
42343621989,0.855157127136495,0.907815847166515,-0.0383769891102633  
"Hspa1a",1903.57642936385,0.218936723026434,0.30283567136995,0.7229555  
291027,0.469707206283547,0.607698276793034,0.109047297036096  
"Tmem207",291.642002078792,3.42341908842394,0.784945501510654,4.361346  
21045086,1.29264638973201e-05,0.000207099583459282,29.038504709633  
"Gm10352",56.283865498164,-1.48202694464788,1.34195677088662,-1.104377  
56029109,0.26942939070096,0.411638791716606,-1.31546050367836  
"Ndufab1-  
ps",1.10132146249383,1.28975447219286,3.00737143339362,0.4288643756709  
01,0.668021926768984,NA,NA  
"BC049352",39.6078020167126,-0.711751533686596,0.682486525996497,-1.04  
287997868876,0.297003883467318,0.441352162171006,-0.582150240374923  
"Gm6611",7.32572020517184,-1.24301073175963,0.558039148690274,-2.22746  
152250608,0.0259164446285581,0.0703982777051581,-3.29843647295451  
"Gm17072",0.371930246943201,-0.0636247887862148,4.76187154663094,-0.01  
33612988429371,0.98933954313367,NA,NA  
"Cyp2c69",20.213053369064,1.69500999284992,1.09863870252408,1.54282749  
092645,0.122872637440619,0.230562090734018,2.48697812026138  
"Myh15",0.853481824797322,-0.775546930364913,1.55847877106008,-0.49763  
0731176008,0.618744339233404,NA,NA  
"Gm4468",74.3605430780034,0.23810918094209,0.463573360024659,0.5136386  
20065277,0.607504673065063,0.727900578591692,0.075621287162913  
"Gbp11",58.8967776646576,-1.18280184053735,0.954552044157791,-1.239117  
18358002,0.21530210423424,0.350267870534769,-1.24082663658422  
"Gm9027",3.03427426236906,-0.825421979899202,1.20590444757123,-0.68448  
3734645522,0.493669756851436,0.629822215474011,-0.381607188867956  
"Vmn2r59",353.931290163207,0.891566021143069,0.348004365355665,2.56193

918783713,0.0104089542495211,0.0349920327512351,2.98909533949098  
"Peg10",110.16962374089,-2.13414422301501,0.529106094699937,-4.0334901  
5328449,5.49544845198638e-05,0.000621482488983404,-15.7572464805125  
"Gm2244",0.904608781336655,1.37314655683541,1.66590590583883,0.8242641  
74838852,0.409789469786907,NA,NA  
"Vmn2r85",0.256704320198229,-0.973327371522738,4.04120016535012,-0.240  
851066935065,0.809670548691787,NA,NA  
"Vmn2r4",52.8591200321491,0.444177166330362,0.455809295421816,0.974480  
272323781,0.329818129670034,0.474471957435559,0.331157513115425  
"Gm17229",24.5261589321211,0.434728202594654,0.359417911344124,1.20953  
405179194,0.226457737083262,0.362637397967266,0.440967355516795  
"Gm7289",0.403722453358459,1.33361387574888,4.67721849148482,0.2851296  
93679441,0.775544781586873,NA,NA  
"Bend4",155.954962159628,-1.26596944245197,0.270864330607324,-4.673813  
78571866,2.95657421818427e-06,6.53597325466631e-05,-12.1983804760329  
"Gm4540",7.9909428097999,0.116912309047572,1.27771535604309,0.09150105  
96801728,0.927094464267113,0.955366411092446,0.00533825526101815  
"Dynlt1a",356.254036067367,0.0517105718527485,0.166579087023334,0.3104  
26553397456,0.756236604124227,0.841774546120265,0.00890678715850567  
"Serpina4-  
ps1",1.37235612230384,0.36208291076761,1.62313087875887,0.223076842111  
757,0.823475701555397,0.886809474502639,0.0434952521552113  
"Kcnb2",57.6511762528634,-0.8728257804552,0.536822530224419,-1.6259112  
3008625,0.103968540788234,0.203237185533735,-1.39074452142871  
"Gm6793",2.7750234889582,0.141345255905642,0.966298705540638,0.1462749  
09709788,0.883704371950095,0.927665976326206,0.0106127036305097  
"Gm5819",2.95451336434176,-0.0882871191349067,0.949204571688269,-0.093  
0116876469295,0.925894276076222,0.954634159744814,-0.00409891408737166  
"Vmn2r113",57.3913214477843,0.710848917574625,0.433756674445098,1.6388  
1954896489,0.101250846590117,0.199232998461033,1.14679854975769  
"Gm10320",0.0843599768587285,0,4.78471990595952,0,1,NA,NA  
"Fancf",154.933806534411,0.013201368958981,0.187159765172931,0.0705352  
93452539,0.943767610380262,0.965354153142081,0.00046548352885591  
"Vmn2r90",97.8674933606767,0.348615353126736,0.26661246943818,1.307573  
32491371,0.191018069470788,0.320881392137626,0.396265396103244  
"B930094E09Rik",29.2994481182102,0.00648028727980854,0.515029778275672  
,0.0125823545611375,0.989960998446323,0.993321687496475,4.342254014133  
63e-05  
"Gm6482",18.5689544358294,-0.378259241967077,0.721410136522498,-0.5243  
33139800955,0.600046850951973,0.721848068846346,-0.123290041707768  
"Gm17026",0.0985813917510383,-0.0660609963454596,4.78471990596623,-0.0  
138066590403935,0.988984229894568,NA,NA  
"Vmn2r86",6.62019691865254,0.87519464820447,0.600477548251205,1.457497  
70454089,0.144979044537502,0.261208779374626,1.17489216425888  
"Rergl",258.623482472645,-0.0704036868434015,0.513491352523071,-0.1371  
07833457114,0.890945560743569,0.932561768321665,-0.0049155776830302  
"Gm5624",4.62320879556528,0.721911356083406,1.23974907732125,0.5823044  
10859699,0.560361654967468,0.688661342897804,0.269277013568499  
"Gm3696",37.0233967772401,-0.792901094188811,0.425178806385216,-1.8648  
6504567313,0.0622003230513897,0.13717577132645,-1.57509181766073

"Gm45351",109.995536590291,-0.549358981354569,0.237161275173388,-2.316  
39411178293,0.02053675996213,0.0586168827632991,-1.55838448873257  
"Dnaaf4",181.714751242884,0.938212766086837,0.190598803149309,4.922448  
36055907,8.54681215814845e-07,2.45587555310696e-05,9.95860510799866  
"Tnxa",0.305315197043413,-1.66958758573036,4.75872404509821,-0.3508477  
41938334,0.725702578142961,NA,NA  
"Stk19-  
ps1",0.45952925068954,-0.203300133783799,3.22725711898957,-0.062994712  
3170186,0.949770714919743,NA,NA  
"Slc22a13b",43.0315502392387,0.196177905701545,0.384229894174704,0.510  
574290745701,0.609649181963216,0.729483875416925,0.0618780455783259  
"Gm19345",6.44351435080167,-1.43664770035011,0.802247876619556,-1.7907  
7781595849,0.0733289565538281,0.155663363624011,-2.67225024470261  
"Gm2381",33.6289165826175,0.0626931287087233,0.296042420309297,0.21177  
076124166,0.832285880306507,0.892673419561928,0.00711783155255665  
"Gm5977",0.605984479168043,-2.99062279285645,4.73052412475934,-0.63219  
6922367159,0.527258208124144,NA,NA  
"Gm20521",10.0736412679629,1.34131077320334,0.704267207326866,1.904548  
10226711,0.0568388382214573,0.128313496311448,2.7540850009947  
"Gm7030",0.314597658684723,-0.063287456101743,3.87368103462338,-0.0163  
378077689084,0.986964895323368,NA,NA  
"Gm20426",0.528325977262567,2.07595411536087,3.41884866740735,0.607208  
542206448,0.543712524007071,NA,NA  
"Gm2308",1.34080886343083,-0.532548414736774,1.87306958099807,-0.28431  
8543282842,0.776166276790267,0.855191308976103,-0.0833065921255138  
"Zfp963",375.154666855104,0.284663980047204,0.146630048575684,1.941375  
47393822,0.0522127509516814,0.120194122556775,0.603102531536196  
"Gm20519",2.38398088276839,0.88981535684989,0.946107915193546,0.940500  
911746267,0.346960682201342,0.491752517377464,0.631572879268388  
"Vmn1r-ps46",0.177130336839638,0,4.78471990596529,0,1,NA,NA  
"Gm19684",13.361514241304,-1.38096228719478,0.55295997560447,-2.497400  
07978909,0.01251077176671,0.0402002353176188,-4.43825043089664  
"Gm8752",41.5638587989867,-0.237995657395969,0.486750021316266,-0.4889  
4842726947,0.624878209322903,0.742162500975133,-0.0709672243680488  
"Hmgb1-  
ps7",0.158210390104713,0.913886219740627,4.78471990596623,0.1910009859  
93155,0.848524820668283,NA,NA  
"Olfr113",4.38872874929021,0.731410210957792,0.815278014901365,0.89712  
9810431942,0.369649653315462,0.514632555540513,0.485877351795699  
"Cdk3",60.1968703930844,-0.590365209729578,0.341322966199596,-1.729638  
10874756,0.0836949528600838,0.172121526301647,-1.03877976342506  
"Gm20509",0.164675992287458,0,4.78471990596349,0,1,NA,NA  
"Zfp419",0.195655326416926,-0.550938421589028,4.78471990596623,-0.1151  
45386232963,0.908329886106443,NA,NA  
"Gm6633",0.153839396210631,0,4.78471990596586,0,1,NA,NA  
"Gm18284",2.09191562099308,0.841926559542455,1.2259659787149,0.6867454  
51472472,0.492243149659545,0.628660308643597,0.390792183133842  
"Gm20388",2768.92719754452,0.0834938761211031,0.209957987714972,0.3976  
69443443371,0.690873864356036,0.793184867644939,0.019345444273809  
"Zfp977",37.3688364590985,0.549523391343867,0.388938095857557,1.412881

37417406,0.15769060649268,0.27845059277253,0.702573700921187  
"Olfr754-  
ps1",1.35902688010024,-0.989922044621741,1.7964180006284,-0.5510532873  
05883,0.581597146108288,0.705969068967155,-0.344674872764758  
"Gm20503",98.5011073295546,-0.117049094733368,0.517217469542497,-0.226  
305377575323,0.820963916180295,0.885204580970159,-0.0142725564425754  
"Smim40",10.8340865350278,-0.268271264449393,0.683979788129101,-0.3922  
21040892449,0.694894898772422,0.796722376588539,-0.0609643756083776  
"Gm20532",0.405668613713217,-2.64765752416052,4.73568101570637,-0.5590  
86964552573,0.576102370639135,NA,NA  
"Gm20430",4.51598828239892,-0.156273020260836,0.943875773862988,-0.165  
565241304223,0.868499103121049,0.917552810997049,-0.0134465340691057  
"Gm20441",1.4910052917622,-1.62168748439092,2.01283772385418,-0.805672  
243307184,0.420431858029865,0.563407585420365,-0.930446372645266  
"Gm17782",0.0825783317518567,0,4.78471990596623,0,1,NA,NA  
"Gm20479",0.450630814599774,-1.39853246761052,4.55359156233223,-0.3071  
27340796069,0.758746447798141,NA,NA  
"Gm19203",1.55889905049307,1.1115614243261,1.34289047003565,0.82773796  
4583658,0.407818913765095,0.551508751601596,0.661487504400655  
"H2-  
Pb",0.10500178835157,-0.544048378937456,4.78471990596623,-0.1137053766  
21746,0.90947135024012,NA,NA  
"Gm20541",1.81964181984952,-2.14191785935936,1.77174749638603,-1.20892  
952507532,0.226689921919088,0.362860200113158,-2.17134276128625  
"Gm20445",0.842366716880659,-0.0784077076626684,2.26683431412196,-0.03  
4589077452288,0.972407411219961,NA,NA  
"Vhl-  
ps1",1.819905291239,-2.96311923821569,1.88109657319281,-1.575208461087  
32,0.115208334825664,0.219508265992803,-4.49317145599742  
"Zfp141",475.948679504011,-0.43220291971057,0.152023277478415,-2.84300  
487977532,0.00446903861769186,0.0182029068242648,-1.73148009190345  
"Gpank1",743.471999600138,0.145521125245511,0.155571365930006,0.935397  
875923923,0.349583291154865,0.494602473941974,0.102447006343727  
"Gm18958",0.211119668107668,-1.05381423250207,4.78028750946316,-0.2204  
49968838886,0.825520732945918,NA,NA  
"Gm18733",5.01809019591233,-0.47988578598882,0.890994768022331,-0.5385  
95515048852,0.590165982890881,0.713527397185242,-0.16197798219957  
"Vmn2r-  
ps45",0.145705268621658,1.63805446688875,4.75839587017326,0.3442451009  
92218,0.730661966931968,NA,NA  
"V1rd19",0.111495491977094,-0.523384542516081,4.78352240235852,-0.1094  
1404648968,0.912874093147839,NA,NA  
"Gm8835",0.822969828580752,-2.50311175542395,1.99091827456481,-1.25726  
49452279,0.208657713066747,NA,NA  
"Gm20472",0.62693904187703,1.82336843971266,2.88549759071253,0.6319078  
0182298,0.527447125028725,NA,NA  
"Gm20518",424.15789497475,1.78234239987238,0.563138035313626,3.1650186  
776671,0.00155072996215345,0.00825672659805242,8.54941002968853  
"Cyp21a2-  
ps",3.37201593615999,-0.666530117202008,1.04287244212494,-0.6391290921

8686,0.522738955668687,0.655963712036817,-0.281042296334456  
"Vmn1r180",6.00234506959831,0.234117896767001,0.879393526521938,0.2662  
26541026465,0.790064743600187,0.864751452268803,0.0340204094620311  
"Rpl9-  
ps5",0.325325611346547,-0.558009769952242,3.85288760824683,-0.14482897  
6780392,0.884845903262012,NA,NA  
"Gm18159",49.7455835164104,1.63784948158307,0.823938909760368,1.987828  
78461149,0.0468306290844968,0.110652400132031,3.60549882678787  
"Gm20482",1.98082908146335,-2.6503550819898,1.77004672527734,-1.497336  
2251635,0.134305793507865,0.246303081434946,-3.71365756524474  
"Gm19246",0.312475518711752,-0.0534115332843584,4.78471990595824,-0.01  
1162938339995,0.991093448821701,NA,NA  
"Gm20547",12.2308551191849,-1.05926331127506,1.24738711693633,-0.84918  
5707382229,0.395777964988244,0.540132901332734,-0.652442703398608  
"Gm4152",1.35908158987077,-2.20350024663143,1.65061679334783,-1.334955  
66960895,0.181890855843145,0.31000051598742,-2.58069832092305  
"Art2a",11.7735837208506,-2.71680734373488,0.900153728560374,-3.018159  
29605702,0.00254315185619948,0.0119860707982058,-12.0191830475359  
"Fam71e2",0.452839851832186,-1.84923730123856,2.37633763563697,-0.7781  
87944973095,0.436458222523147,NA,NA  
"Actl9",16.5011657210141,1.30826109309525,0.500067593564506,2.61616851  
388009,0.00889226598203762,0.0308837552756982,4.54951059568947  
"Gm17907",0.694893451836808,1.68870295732606,3.05204214235684,0.553302  
634288664,0.580056197517501,NA,NA  
"Nlrp1c-  
ps",18.2096857775278,-0.209952809407487,0.696545899738848,-0.301419920  
045762,0.763094306227547,0.846396995439143,-0.0350131513936605  
"Pagr1b",13.0263055058688,-0.45464944450254,0.651890300957594,-0.69743  
2441984001,0.485532204666909,0.622757312967028,-0.215321241242077  
"Gm8738",67.9394134675279,0.0451054912730295,0.388705963319149,0.11604  
0131949289,0.907620735919372,0.943217504455568,0.00263679355867712  
"Gm20537",2.99985094700222,-0.277444846957188,1.38364842271268,-0.2005  
16867148412,0.841076367788327,0.898266262684664,-0.0297667103520142  
"Skiv2l-  
ps1",0.0983898136351889,-0.544048378937457,4.78471990596623,-0.1137053  
76621746,0.90947135024012,NA,NA  
"Gm20422",8.53523312035866,0.443191972003454,0.906573784729199,0.48886  
4755929203,0.624937448928291,0.742162500975133,0.132154109278381  
"Gm20428",0.256399477666896,-0.931341919961624,4.04527665510033,-0.230  
22947485863,0.817913459338758,NA,NA  
"Olfr755-  
ps1",7.44226424908756,-1.40498362982731,0.86234611609821,-1.6292572130  
8322,0.103258579803563,0.202162444925181,-2.24612445863185  
"Gm8696",0.162549404075142,0,4.78471990596623,0,1,NA,NA  
"Med20",1676.89589701769,-0.0707088929203553,0.101925365717021,-0.6937  
32050142129,0.487850262605298,0.624556698866972,-0.0332836066188239  
"Gm8750",8.58063618203029,-1.09675889846998,2.02886081861261,-0.540578  
677654178,0.588798017855753,0.712182614897733,-0.372262913084372  
"Gm3617",21.4606491112381,-2.16461702517389,0.576376377719342,-3.75556  
165875332,0.000172953173121348,0.00151289410925081,-14.0564403199599

"Serpnb10",11.7073544502987,-1.22984254830509,0.560322664265457,-2.19488274656412,0.0281720097691207,0.0749485395658775,-3.18646490425811  
"Ly6g6c",3.25180743710199,0.336997171243318,0.8546383160352,0.394315542517097,0.693348089685668,0.795399659364824,0.0771422160624159  
"Gm20449",29.7448675072251,0.332055072342489,0.294128260495656,1.12894650715616,0.258920400171341,0.400034069931918,0.304230703729375  
"Olfr760-  
ps1",0.912310047180631,-2.59150517574245,2.18708178349425,-1.18491461787133,0.236051207139743,NA,NA  
"Gm20386",2.90254425697976,0.346147200858854,1.30735521123901,0.264769052728066,0.791187378639495,0.865640059969299,0.0499442268545767  
"Scnm1",1501.07295949127,0.372752629462288,0.200470240177728,1.85939134472938,0.0629716877454575,0.138470956091229,0.736967240165659  
"Gm20481",1.88244995503678,-1.35183538661599,1.48066100375932,-0.912994522840645,0.361245422182591,0.506148551431171,-0.920498609149635  
"Vmn1r-  
ps67",0.12249561258204,0.873634658686964,4.78471990596623,0.18258846408075,0.855120936507189,NA,NA  
"Gm18604",0.087583724926668,0,4.78471990595887,0,1,NA,NA  
"Btntl6",0.321093997635076,-0.540956867554225,3.19755431526892,-0.16917832012143,0.86565638201612,NA,NA  
"Gm20438",5.02694777778766,-0.590614024319089,0.730224955032348,-0.808811066026805,0.418623830010304,0.561563635193733,-0.34080211706751  
"Khdc3",17.7813736193108,0.214566556755668,0.462142373701639,0.464286698138166,0.64244235288151,0.755782611106775,0.060078956797225  
"Gm3654",0.269940656177261,3.22121704550649,4.70540856225078,0.684577545794591,0.493610540289961,NA,NA  
"Vmn1r-  
ps14",101.124882037127,0.937821260599718,0.340025989641636,2.7580869967855,0.00581407223371437,0.0222672913794859,3.56806893434696  
"Gm20689",0.251148999057305,0.369489253842473,4.78471990596569,0.0772227551672955,0.93844633969047,NA,NA  
"A330044P14Rik",81.0304912687029,0.711240393088997,0.224314169954989,3.17073323201879,0.00152054712358859,0.00813824535155927,3.42190603876263  
"Gm6061",54.5131330190431,1.6402406887835,0.482413971825783,3.40006878858776,0.000673689025943904,0.0043351777649684,8.92453755269574  
"Vmn2r-ps6",0.134277293149554,0,4.78471990596623,0,1,NA,NA  
"Gm18588",1.68081949552308,-1.55737296797107,1.69702099211309,-0.917709901768431,0.358770762362455,0.503803552361767,-1.06768641640394  
"Rpl48-  
ps1",0.250615459297013,-0.549660102714045,4.78471990596112,-0.114878219314205,0.908541649252387,NA,NA  
"Gm18294",24.2164846107505,-0.051019043570085,0.397966529354458,-0.128199332875664,0.897991228002328,0.937364578595717,-0.00330006382941792  
"Vmn2r-ps11",0.091991025955798,0,4.78471990596463,0,1,NA,NA  
"Lrch4",573.465043479263,-0.527217066846578,0.289719503295539,-1.81975000250077,0.0687970848098358,0.148172490845264,-1.00665677683412  
"Gm20694",1.75938259441782,2.28826143649902,1.29994123410365,1.7602806776699,0.0783602286650185,0.163635829336032,4.14200919489573

"Gm20662",5.05537078692049,0.439514164068154,0.945661618674184,0.46476  
8956875243,0.642096920691591,0.755512990142094,0.123221445322273  
"Vmn2r-ps12",0.220934797106265,0,4.78471990595636,0,1,NA,NA  
"Gm20657",0.41000288221989,2.33350487144562,2.57475159378718,0.9063029  
13677698,0.364775543747209,NA,NA  
"Gm20708",678.122161226417,2.03114090117597,1.02797779274364,1.9758606  
8056482,0.0481705585341052,0.113187460869846,4.42526676744494  
"Vmn1r-  
ps24",0.183996721562015,-1.22848682929816,4.77749098746911,-0.25714058  
5407771,0.797070247995583,NA,NA  
"Gm20691",0.229620943444323,0,4.78471990595749,0,1,NA,NA  
"Smim17",9.78560868717677,-0.223936770387724,0.924371848022122,-0.2422  
58319384003,0.808580008218555,0.878067000849089,-0.0291190306623988  
"Gm7584",0.123655532110202,0,4.78471990596332,0,1,NA,NA  
"Higd1c",25.6101590202998,2.85152916498994,0.889642918886563,3.2052513  
479889,0.0013494458469623,0.00740977302809772,13.9866235774767  
"Gm20695",19.9327015697349,-2.2155562468971,0.626148308627352,-3.53838  
893496984,0.000402576600555327,0.0029082766052715,-12.9392796404302  
"Gm20706",32.2291644804242,2.14698583827201,0.716025778719612,2.998475  
61649417,0.0027133386738564,0.0125545034320959,9.39880802993581  
"Gm18367",0.114950709829796,-0.0573309197909873,4.78471990596623,-0.01  
19820848278913,0.990439908267773,NA,NA  
"Gm20683",399.39478902329,-0.130168471136014,0.278025504445234,-0.4681  
88957684833,0.63964946805115,0.753507676125308,-0.0368397696171187  
"Gm19459",0.803681266086334,0.892992153085357,1.91251144421005,0.46692  
1207603126,0.640556251563742,NA,NA  
"Mipep-  
ps",0.0936147576180412,-0.544048378937456,4.78471990596623,-0.11370537  
6621746,0.90947135024012,NA,NA  
"Gm18953",0.121698401091076,0,4.78471990596558,0,1,NA,NA  
"Lim2",0.271479428075456,-0.889859440425094,4.78328504814794,-0.186035  
210418757,0.852417149357871,NA,NA  
"Gm20614",0.218719056083763,0.87276273051445,4.78471990595952,0.182406  
232270231,0.855263935210973,NA,NA  
"Vmn2r-ps31",0.14728986473751,0,4.7847199059615,0,1,NA,NA  
"Eif4e3",2538.40549238949,-1.02484003485724,0.392364051142483,-2.61196  
210986485,0.00900242309309395,0.0311885652930252,-3.55384163034546  
"Vmn1r-  
ps15",9.42274451782218,0.720138402483656,0.45560860702635,1.5806075464  
2857,0.113967799276768,0.217793212809803,1.09764160099319  
"Pou5f2",81.8556697407055,0.176144718716748,0.448075574742907,0.393113  
85990592,0.694235387777375,0.796138311855356,0.0401578868461587  
"Gm20656",1.42767047285691,1.36631985888803,1.88467335522364,0.7249637  
47750285,0.468474270831489,0.606648823316223,0.682893770510484  
"Rpl41",24830.8542161288,-0.0264020115046129,0.25651539552728,-0.10292  
5640975046,0.918021987216009,0.949731665874555,-0.00136170463421098  
"Gm4705",0.11337588115053,-0.0642404114871261,4.78471990596623,-0.0134  
261592631624,0.989287796647434,NA,NA  
"Gm20637",2.37015627336927,2.30777449574673,1.00863105333704,2.2880264  
1769902,0.0221359827225324,0.0623169782159887,6.40527742266745



"Gm8488",0.576701334176672,0.272234534406993,2.54385796927922,0.107016404883692,0.914775965278822,NA,NA  
"Gm21970",2.13248294018691,-1.29334164626352,1.64895836971729,-0.784338567919851,0.432841474578974,0.574939919023151,-0.715851321562183  
"Gm18417",0.595671384240696,-0.785218577547498,2.13004482103568,-0.368639462321598,0.712396477335679,NA,NA  
"Gm3307",0.0721532113593249,-0.544048378937457,4.78471990596623,-0.113705376621746,0.90947135024012,NA,NA  
"Gm20716",5358.92033609647,-0.120734331845556,0.210580207996595,-0.573341307780971,0.566413621597272,0.693801532472899,-0.0441367694814992  
"Vmn1r39",0.727598285558433,-0.879240630616078,3.14239783519994,-0.279799273270609,0.779631509287918,NA,NA  
"H3c14",467.960172627314,0.0892164902706552,0.168597114217375,0.529169735109622,0.596687709472562,0.719227062271019,0.0294038074398392  
"Obox3-ps7",0.0721532113593249,-0.544048378937457,4.78471990596623,-0.113705376621746,0.90947135024012,NA,NA  
"Vmn1r-ps47",4.89892206775872,0.568293806648405,0.699266376215507,0.812700032459822,0.416390062614955,0.559722401990099,0.329789039017564  
"Methig1",1241.48129636612,2.81927733467785,1.04455610816823,2.69901952861282,0.00695440953183092,0.0256327177791379,10.3295099256467  
"Gm8355",3.87915797539003,0.298453410718099,0.886623896899182,0.336617828328212,0.736405014735416,0.827704291313188,0.0564373383556473  
"Gm20796",0.981909135600836,0.770580855587088,2.10172184380285,0.366642644867221,0.713885594104893,NA,NA  
"Ppp2r3d",1808.68102986376,-0.0388723971346617,0.17267447529876,-0.225119532388356,0.821886286298624,0.885807241736254,-0.00471350797255636  
"Olfr1303",4.79876403646052,-2.09333976528345,0.888107352413499,-2.3570796476289,0.0184192957254489,0.0539168186105461,-6.11320694511098  
"Gal3st2b",9.89741461902875,-0.574230533176909,0.813426591755872,-0.705940202836703,0.480225324850983,0.617640724534596,-0.276692030601642  
"Asmt",1.22186492808052,0.313449087577983,1.38236567409041,0.226748315191081,0.820619455354266,NA,NA  
"Gm6900",1.08445717156941,0.828385164666788,1.4466463345563,0.572624521197062,0.566898953051194,NA,NA  
"Ccl27",8.6665441021476,-1.08950131719179,1.1084349497963,-0.982918589306491,0.325647507969911,0.470521009570549,-0.821391023012184  
"Gm7970",1.00471629693427,-2.53878441097275,2.3633986412205,-1.07420913539228,0.282728958872377,NA,NA  
"Ighv3-1",7.96308067512919,-2.81119416556622,1.82347990036189,-1.54166446529425,0.123155151294183,0.231003284264933,-4.11930845489878  
"Gm7882",2.54287326082056,-0.174660844942102,1.08334556185394,-0.161223575461189,0.871917313475116,0.919798938383261,-0.0146016777371172  
"Igkv1-110",53.5587312333453,0.992313903304539,0.84395550084552,1.17578936603931,0.239679056813418,0.377942407541418,0.965534780463619  
"Gm5117",3.51624129335211,0.300643915972717,0.933710768638742,0.321988270962137,0.747461580151765,0.835782134929573,0.0539317015539038  
"Lrit3",1.56893301486158,1.11290849300618,2.3803952833534,0.467530960420305,0.640120046620699,0.7537782744903,0.314571398035272

"Olfr802",26.8275127799817,0.57540390195124,0.511712945485389,1.124466  
18172897,0.260815309449787,0.402292295202273,0.523949186011848  
"Gsdmc12",1.04293180888983,-2.93354931690483,3.11270037242613,-0.94244  
5133136388,0.345964789257396,NA,NA  
"Tmem181c-  
ps",10.2850055178798,-0.680895288973014,0.454553511777876,-1.497943083  
33436,0.13414803877437,0.246054775096763,-0.954752126478669  
"Rpl35a-  
ps5",0.996341306765475,1.50522656132508,1.71264902400381,0.87888793338  
7646,0.379462041862703,NA,NA  
"Gm3033",0.530879462435597,4.46045939100517,4.66245073320633,0.9566770  
02340728,0.338730309386402,NA,NA  
"Ighv1-53",19.5577961397997,-1.09086390026141,1.18699025266555,-0.9190  
16729759762,0.35808682171195,0.503133015042127,-0.749315177149929  
"Ighv1-76",8.08055204188477,-1.50302851435784,0.912270616106919,-1.647  
5687014583,0.0994412074759773,0.196482316730517,-2.44570221097596  
"Gm3629",5.42245994592753,-2.48925175013832,1.22099549579819,-2.038706  
7427395,0.0414793044101376,0.100642543229077,-5.71577062078853  
"Olfr893",67.1170256482443,0.359321248724859,0.327255129481316,1.09798  
507755819,0.272211005404764,0.414815958060343,0.316174072353608  
"Tomm20",7841.69092510243,0.103627273600722,0.302286506546926,0.342811  
443304153,0.731740316546191,0.824232968920718,0.0200313654343676  
"Igv9-129",6.591495598318,-20.3882729089052,4.71316851346459,-4.32581  
030163889,NA,NA,NA  
"Gm3883",2.73965606247714,-3.85457555358468,4.65264357261576,-0.828469  
985595222,0.407404386081019,0.551225184893259,-2.29583095083245  
"Zfp853",72.6453463102698,-0.881191932444928,0.523518468230539,-1.6832  
1078609376,0.0923342935233883,0.185628401040984,-1.4839346580944  
"Gm379",12.3083261312536,-0.356606974591749,0.839627529996202,-0.42472  
0440733241,0.671040481004481,0.777510535929723,-0.089743027961643  
"Gm21677",1.83309608136743,-4.62034068168052,3.79625467108395,-1.21707  
869518703,0.223574275772682,0.359655138838007,-4.72480498737687  
"Rpl36-ps4",0.139896150021884,0,4.78471990596454,0,1,NA,NA  
"Gm20918",0.147383004787727,-0.0638134555255149,4.78471990596623,-0.01  
33369260436632,0.989358988081303,NA,NA  
"Hmgcs1",18354.761117071,0.704897167069354,0.319564188336935,2.2058077  
6193276,0.0273974626009733,0.0734895757041928,1.84021279867989  
"Evi2b",576.619281788021,-1.41526401810102,0.45854010115907,-3.0864563  
7431406,0.00202557667535915,0.0100915434173577,-6.50463479250998  
"Trav4d-3",0.906480904226787,-0.653094756228666,1.94082673870301,-0.33  
6503379309947,0.736491303689487,NA,NA  
"Olfr46",1091.83077794641,0.769252572399319,0.38678483507209,1.9888385  
0308129,0.0467190314044749,0.110415475675691,1.69505187165299  
"Trav3d-3",2.10696227486414,-0.974125445469554,1.58537027804518,-0.614  
446643134175,0.538920221558601,0.669930919984036,-0.390215829858476  
"Gm16867",429.006865726944,0.0323934968959155,0.124866993171094,0.2594  
24016493531,0.795308101360139,0.868821734118311,0.00455508652019815  
"Ighv1-34",2.86838582608211,-1.63241848296339,1.77153752067627,-0.9214  
69889240746,0.356805154791315,0.501874686778319,-1.12539716777452  
"Trav4-3",1.49409974734698,-4.43267179701277,2.45289115093568,-1.80712

128025815,0.0707433713236506,0.151344552783469,-8.36975419820432  
"Gm8165",1.10441241933614,-0.319347616246475,2.37951638894424,-0.13420  
6941263458,0.893238937235978,NA,NA  
"Mrgpra2a",0.360706870233544,0.398324894395847,4.75161321534477,0.0838  
294020038298,0.933192070871836,NA,NA  
"Vmn2r-  
ps19",0.310431040541306,1.58249897671868,4.7564105545634,0.33270865888  
5721,0.739354212742125,NA,NA  
"Gm2237",182.07196299103,-0.942227915250136,0.308013687191159,-3.05904  
56022994,0.00222043347741159,0.0108397626295872,-4.26314240870023  
"Gm10406",12.8387086797377,-1.72295994477784,0.759014582930761,-2.2699  
9583871634,0.0232078355263852,0.0645976269940697,-4.72018247507332  
"Gm21704",29.5659483797296,-7.62582768558016,2.3923922146607,-3.187532  
39491781,0.00143492383204195,0.00777386631763097,-37.0385508348744  
"Rnasek",4975.54215561657,0.840667519410925,0.21212695944181,3.9630395  
0060405,7.40015318331721e-05,0.000780556799219901,6.01539899732561  
"Fam205a3",62.218686913756,-0.893399137513215,0.588286400536595,-1.518  
64659237119,0.128851476605917,0.238681792546911,-1.27990506930257  
"Igv4-59",55.7065787166813,-0.590815049140824,1.39853786509223,-0.422  
451950631928,0.672695165403845,0.778687386312288,-0.14778979377263  
"Trav15-1-  
dv6-1",0.0821276541927872,-0.544048378937456,4.78471990596623,-0.11370  
5376621746,0.90947135024012,NA,NA  
"Gm13160",0.167856841899961,0.889228124840884,4.78471990596623,0.18584  
7477452562,0.852564371426054,NA,NA  
"S100a2",21.3832746854712,-1.39791932809457,0.732186266314494,-1.90924  
002867616,0.0562311347191728,0.127206713627385,-2.88242836465458  
"Trav7d-4",0.241196116588866,-1.04895813818366,4.78101847796786,-0.219  
40056141124,0.826338032739359,NA,NA  
"Gm8879",0.558014303022041,-3.02365820842526,4.73176631395319,-0.63901  
258173063,0.522814746998351,NA,NA  
"Gm21762",9.08423336871031,-0.819818204895119,0.848258084210853,-0.966  
472610346895,0.333807745969657,0.478501943163974,-0.604283905597745  
"Gm21833",276.203979080131,0.816279771321646,0.326915947301717,2.49691  
022435283,0.0125280669336094,0.0402251116528057,2.62292224835005  
"Ldlrad2",0.616544551437031,2.48599727811129,2.15524641469815,1.153463  
13124918,0.248720342023537,NA,NA  
"Gm6465",0.108229817038987,-0.909962624367568,4.78339755770097,-0.1902  
33534509919,0.849126134161093,NA,NA  
"Ighv1-36",0.509156122708963,-0.867682324491012,3.86853711676017,-0.22  
4292102751668,0.822530020777039,NA,NA  
"Scgb2b7",0.100532412451372,0,4.78471990596383,0,1,NA,NA  
"AC133103.2",2.17499498932652,-0.126891427435967,1.71925551884135,-0.0  
738060317651227,0.941164727463839,0.963500464984245,-0.004718116204573  
78  
"Gm21541",410.918450976248,-2.36861616697257,1.95508417838704,-1.21151  
620639,0.225697627286442,0.361863846560386,-2.40766813950697  
"Ighv1-80",20.3813750110968,-4.72067642616168,1.49420643719333,-3.1593  
2009704685,0.00158137698781741,0.00837189478915665,-22.5784054575337  
"Gm4767",4.52498846062535,-1.91815210469428,4.19933842895986,-0.456774

831832116,0.647832897630708,0.759961344919123,-0.526509176623253  
"Gm20826",60.9156234904133,0.296293977078485,0.404318685912333,0.73282  
2863256758,0.46366647474611,0.602624059968963,0.150061559079441  
"Gm1604b",6.63885494660576,0.229339216999825,0.629691851057045,0.36420  
864684026,0.715702210534316,0.811559273102535,0.0478855361840745  
"Ighv1-61",2.3963813583027,0.0495498435994539,1.65306782582881,0.02997  
44770451937,0.976087408389246,0.984978381574035,0.000749965903798687  
"Ighv1-64",12.135202652424,-1.87097724073664,0.996897843469966,-1.8767  
9936614589,0.0605455973848712,0.134460433700378,-3.75408832352891  
"Gm8494",0.796986904713568,-1.61556617780639,2.42183119979912,-0.66708  
4550707084,0.504718127841173,NA,NA  
"Gm15921",0.158020009246596,-0.555660103866358,4.78471990596623,-0.116  
132211453692,0.90754776047329,NA,NA  
"Igv5-45",1.02140071964136,-3.2466179672631,2.39173193343956,-1.35743  
388373551,0.17464338805423,NA,NA  
"Vmn2r44",17.7631217677796,0.27271423861535,0.418086484160603,0.652291  
449131348,0.514213175190851,0.647901830040152,0.1183623677925  
"Ighv9-2",0.977584453497515,0.442126143091772,2.33783202180323,0.18911  
8011460356,0.850000325106316,NA,NA  
"Fam177a2",0.43791862463334,0.4.78471990594448,0,1,NA,NA  
"Gm8922",0.312933965826522,-0.725402629537759,4.78471990595893,-0.1516  
08170132245,0.879495989069521,NA,NA  
"Gm17258",1.55771007647151,-1.96892569794181,2.33815874833594,-0.84208  
3840262379,0.399741025912592,0.54394239118178,-1.19890235915817  
"Igv3-12",27.2313938348406,-5.9461869428909,1.52854354832324,-3.89009  
979428697,0.000100203005817725,0.000992763316785565,-41.1179913707438  
"Ccl21c",7.8690205659288,0.305266768598389,4.50332433421612,0.06778698  
26694431,0.945955206250941,0.966678962865873,0.0103451340989986  
"Rpl31-  
ps9",1.18035410191169,0.672836072431083,1.82784195068356,0.36810407605  
5078,0.712795631706655,NA,NA  
"Ighv1-74",5.75491327624755,-4.20423296292953,1.51959692839844,-2.7666  
7640238028,0.00566309372220741,0.0218219370347036,-16.0805164264014  
"G530012D18Rik",3.23079305539457,-1.18190594025363,1.34083568153747,-0  
.881469636084263,0.378063681501878,0.523134317076405,-0.76577698356554  
2  
"Gm3264",2.38234637150892,-3.93152683032943,1.93646248343584,-2.030262  
3283224,0.0423298812866924,0.102362399271726,-8.96087681208619  
"Ighv5-15",0.81141857030893,-0.0725642294269836,3.39994256729769,-0.02  
13427809413435,0.982972217345195,NA,NA  
"Olfr1512",0.162925563196302,0.410902425832286,4.78471990596623,0.0858  
780521969359,0.93156335885274,NA,NA  
"Vmn2r20",31.1682381913667,0.1633566396774,0.334218359405502,0.4887721  
90636009,0.625002988307092,0.742162500975133,0.0487108354280118  
"Gm7233",84.5782333149886,-0.555388786994349,0.635151610940664,-0.8744  
19236962675,0.381889984965438,0.526743278741858,-0.356027531151853  
"Slc6a16",1.6644661012184,-0.371899946599134,1.51299725884674,-0.24580  
3450352984,0.805834386000559,0.876598909743299,-0.0489813557134833  
"Gm7995",0.447915028026776,0.4.78471990595164,0,1,NA,NA  
"Ighv2-3",2.24256909130667,-2.73202239807467,1.98911626122163,-1.37348

552788804,0.169601457236195,0.294024114269702,-3.34425084207535  
"Gm10580",1.59828068390471,-3.12952935539734,1.80246357897457,-1.73625  
109095283,0.0825194470612991,0.170225222952128,-5.54124756890816  
"Ighv6-4",0.157502682527355,-1.19648096621745,4.77621924155054,-0.2505  
07965758505,0.802194545266423,NA,NA  
"Trav6d-6",2.81776553307886,-1.75851595723083,1.35720624991663,-1.2956  
8807787236,0.195082970430877,0.325661623070312,-1.97287272653809  
"Vmn2r-  
ps15",0.384448387097986,-2.03655495586473,4.73042320815035,-0.43052278  
1208206,0.666815398677432,NA,NA  
"Rpl31-  
ps14",1.4137124618376,-0.682094783679278,1.60164004134118,-0.425872709  
268747,0.670200601922447,0.776814370246337,-0.172265672474557  
"Ighv5-16",12.6288349107369,-4.59847404694059,1.78566710979872,-2.5752  
1349959732,0.0100178228642925,0.0338288032919943,-15.5724687339551  
"Magea3",0.36226610087021,0,4.70155112428755,0,1,NA,NA  
"Ighv1-50",7.03677959397038,-6.55432768562688,2.26759853950139,-2.8904  
2684207587,0.00384719064497631,0.0162999833106797,-26.9814876401543  
"Olfr237",0.411615743001983,-1.09338331775659,2.71883385398948,-0.4021  
51575445559,0.687572477753023,NA,NA  
"Gm8926",0.618070333981583,-2.35741781382698,3.69007853930381,-0.63885  
301863297,0.522918553699379,NA,NA  
"Trav14-3",0.891106800708276,-1.53202507379547,3.35944320636927,-0.456  
03541410995,0.648364512249306,NA,NA  
"Calhm3",0.301308077458684,-0.0537851685696529,4.78471990594723,-0.011  
2410276101637,0.991031146507793,NA,NA  
"Trav6-3",1.7940181032989,-0.774799544426312,1.39958581713476,-0.55359  
2023397669,0.579858086245528,0.704428222156717,-0.271465615781859  
"Trav9n-4",0.658985640001204,-3.26688593568791,4.25856504079983,-0.767  
13303762864,0.443002420884527,NA,NA  
"Mup-  
ps24",17.1363905848753,-1.11211829606971,0.516941833593973,-2.15134126  
084911,0.0314492737942412,0.0814880983973575,-2.78841231461725  
"Hist1h2ao",0.271350145920609,2.17220770667885,4.75514872590073,0.4568  
11728063749,0.647806375274202,NA,NA  
"Gm4479",0.284892227750863,-0.995399091794781,3.97978238823053,-0.2501  
1394963164,0.802499228510553,NA,NA  
"Rpl21-  
ps7",1.4736807229401,1.09184701730404,1.4565470892018,0.74961326372384  
9,0.453487660069141,0.59398780035121,0.568739287621394  
"Ap3s1-  
ps2",3.80055561454335,-0.0925178063763761,0.845376648050208,-0.1094397  
46874675,0.912853709612238,0.946353538447837,-0.00510134491908519  
"Gm8159",0.121527413527064,0,4.78471990595379,0,1,NA,NA  
"Igv4-62",0.289476048762417,1.05546202172767,4.7642918462309,0.221535  
971303407,0.824675131263599,NA,NA  
"Gm13290",5.8397469651582,-0.150461779468914,1.10140446294066,-0.13660  
9015608302,0.891339849892103,0.932718531272271,-0.0104799345280322  
"Gm8034",16.7340563395339,0.376458160361441,0.374108602286375,1.006280  
4171321,0.314280697838769,0.459427578831932,0.292799353497408

"Cfap73",0.277335272870028,-0.539592238561351,4.78471990596502,-0.1127  
74049299866,0.910209692727385,NA,NA  
"Gm12424",28.3007113542307,-0.0448918297135207,0.40604991293393,-0.110  
557417409975,0.911967316388699,0.945776221208811,-0.00250268765786929  
"Gm20909",0.522815858307529,0,4.78471990593712,0,1,NA,NA  
"Gm21798",0.128497552327547,-0.0521489793657285,4.78471990596547,-0.01  
08990662756895,0.99130397545808,NA,NA  
"Chchd2-  
ps",7.47388002906127,1.43350854297739,0.538639409519391,2.661351021932  
2,0.00778277733878496,0.0278763732154262,5.13192587443364  
"Ighv9-4",1.47877380719031,-3.94353488182062,1.86251145475174,-2.11732  
114278259,0.0342326017026834,0.08704580959819,-9.62743354243271  
"Gm10045",1.7714370686597,0.243710279304019,1.73378856249457,0.1405651  
67273551,0.888213467446844,0.930645719183114,0.0175170692011444  
"Igv1-117",53.895129817864,-1.50298352959467,0.813070217849987,-1.848  
52857305367,0.0645259148234062,0.140998127000647,-2.94435776891359  
"H2bc13",0.43855748309437,-0.0880347895541746,2.38591172710395,-0.0368  
977563394738,0.970566528712513,NA,NA  
"Gm11942",0.352103118654163,0,4.7847199059532,0,1,NA,NA  
"Igv14-126",18.5264406583784,-7.44059994682206,1.66627626244368,-4.46  
54059560988,7.99170714422755e-06,0.000142825211639,-65.8782458108717  
"Olfr784",108.689449791266,0.625304115684657,0.271506556313518,2.30309  
029798381,0.0212737630733576,0.060342716381194,1.7556757628945  
"Gm10931",2.895060860852,-2.23766426138283,1.22469357876663,-1.8271217  
3900376,0.0676814673576385,0.146248701565115,-4.30179021032777  
"Igv8-28",9.73615087850072,-1.20088039715305,1.49663697824591,-0.8023  
85892242559,0.42232977123163,0.565562216996862,-0.684423731039373  
"Gm3373",36.8907615318743,-0.71960357829258,0.387477919377006,-1.85714  
7316806,0.0632901979199005,0.138951951248983,-1.42022910903954  
"Gm5435",2.0369737894856,-1.30395334825399,1.37398096718943,-0.9490330  
50233083,0.342603802966324,0.487123965204703,-0.937851024415026  
"Gm15097",0.100532412451372,0,4.78471990596383,0,1,NA,NA  
"Vmn1r202",75.5820887598049,0.626399062080669,0.250515771473253,2.5004  
3763072038,0.0124039971960162,0.0399158471414907,2.01762001763137  
"Olfr904",106.767584307287,0.658816941193328,0.422845033868215,1.55805  
765333561,0.119219581865395,0.225399341337291,0.981559238172578  
"Gm3788",0.207610643953656,-0.552362101790618,4.78471990596004,-0.1154  
42933472986,0.908094050430426,NA,NA  
"Vmn2r124",353.588320198747,0.405254643525103,0.358852285920425,1.1293  
0768292491,0.258768061006252,0.399862074298613,0.371470835585681  
"Gm38394",615.543103759452,0.263840073256436,0.413643687038262,0.63784  
3829179558,0.523575345473135,0.656564801396286,0.111006458440561  
"Trav15n-1",0.113058343341289,2.23400583696369,4.75316341366045,0.4700  
04004184502,0.638352156775581,NA,NA  
"Gm13243",1.4441962571939,-0.0145488873316797,1.39891735047842,-0.0104  
001050002733,0.991702066376927,0.994546270544975,-7.95628502524641e-05  
"Igv10-96",49.2882642942608,-0.350982429130217,1.07177091973689,-0.32  
7478962777214,0.74330565183914,0.83278593343444,-0.0642222919378956  
"Gm20778",1.78980292126903,1.45883810718752,1.75462422909874,0.8314248  
04806698,0.405733691155088,0.549565509561786,0.873300310781953

"Smbd1",2.46477779820702,-0.346310466651264,1.11450930203527,-0.310729  
094875068,0.756006576884471,0.841767671021623,-0.0596524031383756  
"Igv5-43",77.7956865151057,1.50942640525282,0.827732967620883,1.82356  
685585606,0.0682175811538912,0.147168222763728,2.89233114047969  
"Gm9830",2.09852627031948,0.29037732135175,1.1607456661121,0.250164467  
401688,0.802460162648515,0.874030362654743,0.0390964501833296  
"Gm21969",1.66959100083616,0.744710899460627,2.26197671204844,0.329230  
135524348,0.741981746600283,0.831876263309317,0.137080105357306  
"Zfp955a",419.192409499293,-0.341890805705526,0.185267851598392,-1.845  
38657276951,0.0649813249592462,0.141739106617673,-0.667975038266473  
"Gm6344",0.783860793438114,-1.7574489624523,2.64547534065367,-0.664322  
564434885,0.506483882101063,NA,NA  
"9430069I07Rik",0.685341869691289,-0.564006905635639,2.63723847400321,  
-0.213862686744253,0.83065413867624,NA,NA  
"Gm21560",1.1442832429813,-2.26499425412955,3.06995285108675,-0.737794  
475679896,0.460639350808255,NA,NA  
"Gm21028",1.70180609488398,1.18264328469214,1.33970623367299,0.8827631  
42371713,0.377364258415979,0.522574453877468,0.767521075148914  
"Gm8546",0.110777372760768,0.4.78471990596623,0,1,NA,NA  
"Trav6-4",0.0794462797275502,-0.544048378937457,4.78471990596623,-0.11  
3705376621746,0.90947135024012,NA,NA  
"Gm21897",722.626152695585,0.853778203800927,0.362163798403887,2.35743  
662829819,0.018401595854656,0.0538972984789068,2.49360858990859  
"Gm11007",1.12184731090024,0.380126479510371,1.75159548299508,0.217017  
275507234,0.828194881847453,NA,NA  
"Igv3-3",0.120701025406302,-0.999956691173237,4.78169649435351,-0.209  
121740025541,0.834353203805696,NA,NA  
"Purb",9014.72696440791,0.196371908039645,0.203210542139478,0.96634705  
0562275,0.3338705498389,0.478556787529139,0.144722246728839  
"Gm21244",353.997183761219,0.688946692674113,0.171649787546455,4.01367  
634951286,5.97803019474488e-05,0.00066377922971034,5.04140941435769  
"Olfr393",136.504299455752,0.773576285150095,0.212398281715824,3.64210  
236966556,0.000270420487662253,0.00213209003980534,4.75799894392831  
"Igv1-133",0.482474709523963,0.914520982280945,4.56033735508456,0.200  
538010913008,0.841059833305568,NA,NA  
"Gm8210",1.25519704374912,2.14262933030969,1.88805584326423,1.13483366  
392666,0.256445018412392,NA,NA  
"Gm10582",0.752469627444009,-0.192520313421809,2.65922565864518,-0.072  
3971329006709,0.942285866423118,NA,NA  
"Vmn2r-  
ps104",0.959816239434727,2.0968685355996,2.46994456652669,0.8489536826  
11705,0.395907065738428,NA,NA  
"Smim18",0.767985175519563,0.397390851700257,1.98548289145122,0.200148  
21251358,0.841364667999022,NA,NA  
"Ighv1-69",26.5184806675372,-7.30697214220651,2.43778523138849,-2.9973  
8141331042,NA,NA,NA  
"Gm5294",0.200234466920578,0.893619035881186,4.78471990596623,0.186765  
17193136,0.851844755154594,NA,NA  
"Ighv14-1",3.64741894167613,-4.15185557451014,4.30801572328701,-0.9637  
51258396587,0.335170648856546,0.479788011737684,-3.04916805078447

"Gm21693",1.45411055396084,-3.43619318736779,4.20936643816484,-0.81632  
0754642084,0.414316706975283,0.55770432534374,-2.00648371120892  
"Olfr635",432.401796704883,0.140798842818707,0.222070344823655,0.63402  
8118119575,0.526062471996548,0.658699021587726,0.0587819073637246  
"Trbv12-2",4.80147359293578,-2.1505893692853,1.14997011895201,-1.87012  
630488623,0.061466280397118,0.136024227674809,-4.29025861446436  
"Gm21451",56.1949338064289,-1.54098157566735,0.368620147731339,-4.1804  
051817332,2.90990130024061e-05,0.000381298760430722,-12.1304949990278  
"Gm21399",2.11485057023031,-0.674704139495867,1.32710030702535,-0.5084  
04779898057,0.61116950134922,0.730854519307396,-0.21154731279253  
"Olfr671",20.5294407296334,0.916118133116893,0.485786103474123,1.88584  
672670797,0.0593156121437841,0.132432818685389,1.85209751582505  
"Olfr191",3.11673301733691,2.01266310638649,0.991369349124097,2.030184  
92367626,0.0423377457277648,0.102368721006939,4.58720956765732  
"Gm8212",1.17065167870922,-1.96591983881231,2.1874390205028,-0.8987312  
65368224,0.368795819284798,NA,NA  
"Ighv1-26",61.0481042825481,-0.0302795429883203,1.06846568081018,-0.02  
83392752169264,0.9773915560755,0.985631267667965,-0.000438234681264236  
"Vmn1r50",0.401476272542022,2.86492907746362,3.66810297282582,0.781038  
345621074,0.434779942037084,NA,NA  
"Gm20821",0.177383095418591,-1.46051059816181,4.76615446877084,-0.3064  
33752353492,0.759274412928056,NA,NA  
"Rpl35a-  
ps7",2.37493149442958,2.49301975926646,1.4224265159398,1.7526527601457  
9,0.0796616290588474,0.165869666042387,4.47884198630446  
"Cyp2d34",2.53086391214421,1.34222816767068,0.844056823519118,1.590210  
67097656,0.111787325981165,0.214446013575439,2.066625028373  
"Ighv1-22",14.8177019623167,-7.73740133402655,1.70213420138998,-4.5457  
0581315392,5.47514660079771e-06,0.000106435103113015,-70.7815548893265  
"Trav13-4-  
dv7",0.709357359195442,-0.0891916867603466,2.24862258248613,-0.0396650  
320311798,0.968360180122001,NA,NA  
"Smarce1-  
ps1",0.184493724217206,-1.09840322189488,4.7792837431451,-0.2298259071  
70779,0.818227052505041,NA,NA  
"Gm15027",1.37791690308376,2.99632936514375,1.60507823024848,1.8667808  
8872958,0.0619321923918075,0.136727009604437,5.9620031997812  
"Gm3187",0.226099379590843,0,4.78471990594896,0,1,NA,NA  
"Ms4a18",0.21000357670314,-1.68827967326331,4.75824391397549,-0.354811  
502685823,0.722730810441824,NA,NA  
"Olfr898",12.7216923408013,0.0571167134111786,0.514874883647203,0.1109  
33190227853,0.91166932602977,0.945567770569097,0.00319680625638897  
"Gm10251",0.211527941194225,-0.935903906010901,4.7829900001607,-0.1956  
73398016608,0.844865807194503,NA,NA  
"Tpd52-  
ps",1.16676685660235,-0.0667907886510847,1.55812613040744,-0.042866098  
8013977,0.965808273135222,NA,NA  
"Fsbp",47.4148371563436,-1.08879350403108,0.385339590635092,-2.8255427  
952176,0.00472005824211109,0.018991270244466,-4.31573341457306  
"Vmn1r169",0.179618527021769,-0.0632395575900079,4.78471990596623,-0.0



132169821500214,0.989454681027516,NA,NA  
"Trav12d-3",0.115448525781332,-0.929094027379545,4.78265364432734,-0.1  
94263289059523,0.845969729109403,NA,NA  
"A630076J17Rik",0.505019532465406,-1.57788730422441,4.52370354396211,-  
0.348804312415753,0.727236225673204,NA,NA  
"Trav14d-3-  
dv8",0.874819154342932,-2.40145772485413,2.50530176841605,-0.958550285  
290555,0.33778534763822,NA,NA  
"Gm3055",175.738682507237,-0.445787318789458,0.205764162411095,-2.1664  
9640814916,0.0302732740351995,0.0791775046463206,-1.13054474856642  
"Tmem121b",4.31093271370883,-1.52087470721954,0.896961720781444,-1.695  
58485271204,0.0899645283656426,0.181950048930634,-2.59160561201633  
"Gm10182",1.66994204117825,0.436574667784928,1.7154423207251,0.2544968  
50468509,0.799111736976113,0.871815166045225,0.059888371272503  
"Gm3252",4.8345763880478,-3.05920873215447,1.41166784841961,-2.1670881  
9682996,0.0302281297420968,0.0791018754142268,-7.76126974563067  
"Gm10310",89.0569915644368,0.681171177296113,0.33950998047757,2.006336  
23888743,0.0448203861034942,0.106911964527974,1.52292814943101  
"Gm3468",108.61465748363,-1.43427907253816,0.409239999656695,-3.504738  
23121238,0.000457056439953981,0.00321721533076632,-8.23167053011597  
"Gm21972",16.6854589356523,0.307000371936687,0.778634781328269,0.39428  
0321530174,0.693374090174577,0.795399659364824,0.0702756315010212  
"Gm13287",0.973673928734987,2.67664778079249,2.96553612251508,0.902584  
784070148,0.366746305122139,NA,NA  
"Gm7102",27.3552359279549,0.437356662880458,0.438172365295374,0.998138  
398311891,0.318212252645174,0.463296610448278,0.336496881846254  
"Gal3st2",54.8792625421688,-0.622842667287878,0.876518255210232,-0.710  
58721662162,0.47734006699481,0.61486269579605,-0.302923452011241  
"Ighv1-42",1.54545932366212,-2.97773009787237,2.263628466183,-1.315467  
68489509,0.188352770920009,0.317443368259861,-3.41681380338573  
"Rbmy",5.2067786198859,-0.331063741746585,3.49525722042438,-0.09471799  
09427062,0.924538827518895,0.953539172650802,-0.0157502819564861  
"Ccl19.1",0.241402050812603,-1.91226050533222,4.75158060865894,-0.4024  
47240787087,0.687354909099483,NA,NA  
"Vmn2r25",2.41697523580154,1.03486551666698,1.073386695818,0.964112486  
859491,0.334989532996212,0.479667027565553,0.760277517217408  
"Olfr857",0.456826070428024,-2.18114608245765,2.96874870618223,-0.7347  
02158493762,0.462520905466512,NA,NA  
"Gm6902",0.342522378462975,2.57781365308102,4.72835985927981,0.5451813  
58821883,0.58562879100035,NA,NA  
"Ap3m1-  
ps",0.0804673502708677,-0.544048378937456,4.78471990596623,-0.11370537  
6621746,0.90947135024012,NA,NA  
"Ccl21a",1369.95284237711,-1.22661585622745,0.41372931447309,-2.964778  
69301968,0.00302900744373496,0.0136333303642531,-5.26860669654063  
"Ighv1-81",10.1423253208576,-2.9626979059009,1.09695884325965,-2.70082  
868113552,0.00691669565116268,0.0255323233257043,-10.8666131488093  
"1600014C23Rik",0.646583242018972,0.87387943905368,2.69096861339162,0.  
324745310928123,0.745373838460821,NA,NA  
"Ighv1-9",13.2295609283167,-0.497868010786469,1.22838804799453,-0.4053

01900811627,0.685255609460157,0.788638523979113,-0.118217368929396  
"Gm21953",0.56355353037716,0,4.78471990594652,0,1,NA,NA  
"Gm28637",0.0862526113334639,-0.544048378937457,4.78471990596623,-0.11  
3705376621746,0.90947135024012,NA,NA  
"Gm10338",0.427709569501475,-1.64627693004895,3.13497025800818,-0.5251  
33189332047,0.599490605409093,NA,NA  
"Gm10359",1982.51908958655,-23.6245321806688,4.71182723542207,-5.01387  
911744023,5.33435068732882e-07,1.65998066661989e-05,-260.01442453137  
"Gm5108",7.81692836022856,0.952473630473211,0.739224920733197,1.288476  
08320415,0.19758028907231,0.328618313751157,1.05996822546885  
"Rnaset2b",6801.82260730606,0.698241758502329,0.17777578522169,3.92765  
391322337,8.57785259336989e-05,0.00087795784706313,4.91416403406968  
"Gm4073",0.0992447183528933,-0.0633897149913117,4.78471990596623,-0.01  
32483648441508,0.989429643452576,NA,NA  
"Olfr954",0.527608224815826,1.19273888664665,2.31044963013097,0.516236  
697434101,0.605689102566808,NA,NA  
"Olfr1307",681.181020804644,0.500721799112902,0.20328672919171,2.46313  
077643497,0.0137729669530693,0.0433627175280067,1.57134274277487  
"Trav13d-2",0.426033483351195,-2.44047133052612,2.99241439260689,-0.81  
555259744626,0.414756070306157,NA,NA  
"Olfr346",0.182141632843385,0,4.78471990595739,0,1,NA,NA  
"Trav7-4",1.71307181204705,0.173256507387183,1.3009883514089,0.1331729  
88981459,0.894056572218427,0.934584130811368,0.0117214313891421  
"Rpl29-  
ps2",47.0369190828909,1.77801887767302,0.405969885124632,4.37968170256  
564,1.18852783727194e-05,0.000194575279354562,15.1926226653698  
"Gm21812",0.117380677374712,1.36942342329479,4.78471990596623,0.286207  
646467918,0.77471908757155,NA,NA  
"Hist1h2ap",1372.73081467075,-0.88469806008191,0.400278872586053,-2.21  
020423677674,0.0270909910755192,0.0728579508952377,-2.31723974211898  
"Olfr143",1.29492549909893,2.15302820749814,1.87177354147365,1.1502610  
5444522,0.250036366256747,NA,NA  
"Gm8122",9.85672435566214,1.06063672335056,0.808226461637889,1.3123014  
0770343,0.189418457385986,0.318716006395577,1.21279018928032  
"Gm14403",139.614080258605,-1.30986297541556,0.458219877234419,-2.8585  
9047259412,0.00425527745828571,0.017581987684182,-5.29299952977442  
"Ighv1-54",1.40773799479114,-1.11562019043737,2.13272632528222,-0.5230  
95803344453,0.600907585806626,0.722571452855849,-0.362508472467302  
"Gm6625",0.0831464917594374,0,4.78471990595975,0,1,NA,NA  
"Trav10d",0.172963361984078,-0.0717962769911718,4.78471990595395,-0.01  
50053249515882,0.988027932164337,NA,NA  
"Mup12",5.2879783599954,4.34571965314285,1.84084184762252,2.3607240669  
5633,0.0182392961463917,0.0535103515290921,12.7237463415004  
"BC147527",179.172777792604,-0.989950084468985,0.544693357721147,-1.81  
744475205403,0.0691490405928034,0.14874977862737,-1.88633971201774  
"Ighv6-15",56.8401880645178,-2.51074949920307,1.03912309652909,-2.4162  
1951007495,0.0156826037945415,0.0477183846420054,-7.63880102328589  
"Gm9780",510.415387185968,-1.61540393301295,0.371194881149598,-4.35190  
250471669,1.34961278221063e-05,0.000214814285939125,-13.6432762653206  
"Cyp2d10",7.99873394870176,1.22877602696565,0.73057926287052,1.6819202

0963976,0.0925843132217566,0.186046474203629,2.06650486606707  
"1810009J06Rik",0.178538064574868,0.409668621193021,4.78471990596623,0  
.0856201886932171,0.931768349135808,NA,NA  
"Olfr907",0.38414313929149,0.387509349128684,3.86982697954836,0.100136  
091659041,0.920236282319972,NA,NA  
"Gm21103",0.288809133799091,1.64858643088234,4.74251194620124,0.347618  
825125546,0.728126466601456,NA,NA  
"Gm21973",0.131375587390002,0,4.78471990595286,0,1,NA,NA  
"Cphx3",22.7154595441537,2.66274105428712,3.33506552546488,0.798407417  
772086,0.424634100063047,0.567650508458571,1.50777539559263  
"Olfr243",17.8078724305847,1.06334561540233,0.594705829097379,1.788019  
49363139,0.0737728628492931,0.156384353102361,1.97297239360052  
"Trav3-3",1.75650038221012,-2.96562376686354,1.7089196168944,-1.735379  
32243585,0.0826736401163743,0.170470667828793,-5.24675794196148  
"Gm20828",0.461235772696006,2.81588870677512,3.53625669155024,0.796290  
8104221,0.425863025642124,NA,NA  
"Muc3a",59.546865162842,0.204562157429245,0.383216443063808,0.53380318  
3897263,0.593477710726385,0.716243402063818,0.0682695971807547  
"Ppp1r2-  
ps1",0.848592545184792,-2.88334912405768,3.14707185098389,-0.916200601  
888463,0.359561689881847,NA,NA  
"Tmem95",21.5850074693097,-0.438849064647073,0.515194029732535,-0.8518  
13179735222,0.394317790096267,0.538705736497829,-0.271465799985101  
"Olfr1487",0.221165247559827,1.41934278833207,4.78471990596357,0.29664  
0726359559,0.766740814459895,NA,NA  
"Gm21962",40.3123185070823,1.49158340347924,0.464985279868414,3.207807  
79103661,0.00133750855388735,0.00735856145138138,7.32649482729211  
"Zfp131",1699.65550362664,-0.018499818203867,0.152679768359897,-0.1211  
67450033453,0.903558405232852,0.940959343333342,-0.00112581284031543  
"Igkv9-120",17.895075831766,-2.16844607323472,0.923205774220262,-2.348  
82204356465,0.018832905292694,0.0548802850690403,-6.29413396000165  
"H2a12c",0.167247593621335,-0.094494860084674,4.78471990596158,-0.0197  
49298170398,0.984243364182464,NA,NA  
"Olfr105-  
ps",3.30728181678366,1.64045296114247,1.01817295235059,1.6111731875761  
,0.10714198005421,0.207576940291831,2.5792074363927  
"Olfr55",0.102465140593258,-0.0648131862778414,4.78471990596623,-0.013  
5458684210592,0.98919229124392,NA,NA  
"Gm4791",4.22214051957476,0.161374664833035,0.938581037312769,0.171934  
716788082,0.863488852931296,0.913989465430385,0.014513429518323  
"Vmn1r201",101.630532787895,0.798085800653108,0.358283164876472,2.2275  
2805292504,0.0259120030874862,0.0703960200919333,2.11781528526528  
"Igkv10-95",0.526676109044664,-2.87956840148443,4.73189377520194,-0.60  
8544599326206,0.5428263354509,NA,NA  
"D430019H16Rik",181.037256933432,-0.759213409654038,0.391931706218258,  
-1.93710638258812,0.0527323405883767,0.1210757391418,-1.60295687040966  
"AC168977.2",1.08656589462239,-3.53966036665434,2.04655505519945,-1.72  
957006832606,0.0837071176469849,NA,NA  
"Gm8765",1.27095876902377,-0.529316999176032,2.55068298187383,-0.20751  
9712538787,0.835603999355647,NA,NA

"Vmn2r112",187.460956043412,0.627697953565679,0.307510082527593,2.0412  
2722873438,0.0412282464448736,0.100144202196465,1.44442344854642  
"Gm5798",3.81391824811822,-2.79805225276633,1.92086752833786,-1.456660  
7074604,0.145210061088264,0.261490246311129,-3.75319059957899  
"Gm3526",0.24660156186104,-0.55131940987109,4.0837229170843,-0.1350041  
17827054,0.892608618585093,NA,NA  
"Igv6-25",13.1652487778909,0.364397807454431,1.27301633346091,0.28624  
7550700118,0.774688526472826,0.85439656593513,0.0573415770534311  
"Gm9726",4.11243887816899,0,4.78471990594781,0,1,1,0  
"Rbm4",988.501817660632,0.22952957688159,0.16562964595318,1.3858000816  
2593,0.16580795746705,0.288653888811834,0.285196679394481  
"Ighv1-84",2.80863213489749,2.13070108576291,2.39585085233958,0.889329  
602334077,0.373825966705491,0.519001616264858,1.3974166457661  
"Gm3604",74.9668252438256,-0.354586453500174,0.219532459074966,-1.6151  
8918429775,0.10626973204311,0.206213886815172,-0.559835759661715  
"Rhox4a2",0.172887320495796,0.406238152080497,4.78471990596623,0.08490  
32252805319,0.93233832764544,NA,NA  
"Vmn2r66",1123.75560531245,0.105681195771645,0.216313037191534,0.48855  
6756188808,0.62515553471075,0.742253234428827,0.0314998453001965  
"Ighv5-6",2.46633584107438,-2.26577581134986,2.16297882017301,-1.04752  
565777257,0.294857204839967,0.439166280648513,-1.86445517891942  
"Gm8011",0.992060247284193,0,4.78471990593019,0,1,NA,NA  
"Gm3699",0.0837058623428615,-0.544048378937457,4.78471990596623,-0.113  
705376621746,0.90947135024012,NA,NA  
"3110021N24Rik",22.5489867505387,1.65832230954776,0.491129863506424,3.  
37654545726087,0.000734022418351627,0.00463620638581795,8.911589996788  
6  
"Trav9-2",0.836585332499709,-3.14653859099481,2.24949955938333,-1.3987  
7270829846,0.161881152844936,NA,NA  
"Olfr943",16.2588726544721,-0.13738441349597,0.522238176032382,-0.2630  
68499778636,0.792497782575226,0.866684713929651,-0.0196569646434001  
"Rps19-  
ps2",0.314567432043405,-1.40311595460953,4.76848460182152,-0.294247768  
792951,0.76856858118782,NA,NA  
"Topaz1",6.86667641994696,-0.292895323583171,0.969731943188424,-0.3020  
3740903919,0.762623545581034,0.846115505390862,-0.0489426321014843  
"Rpl9-  
ps4",1.31681616278898,-3.1287424172111,2.25177446660956,-1.38945638810  
887,0.164694013786697,NA,NA  
"Fbxw25",0.188602809664665,0,4.78471990596145,0,1,NA,NA  
"Igv4-51",0.444635286862636,-0.0838432247179412,4.64290208245724,-0.0  
180583659161659,0.98559229171636,NA,NA  
"Olfr798",0.247888406255613,2.64661656934419,4.72591820395413,0.560021  
662484506,0.575464661989453,NA,NA  
"Igv12-41",10.772643628487,-2.61898200241185,1.71023316566009,-1.5313  
5961516745,0.125680539293943,0.234521882969978,-3.79806440345169  
"Gm5458",0.0778527997966675,0,4.78471990596551,0,1,NA,NA  
"Gm3336",25.8869468572722,-1.15572198785616,0.562384784264971,-2.05503  
779652694,0.0398753541742485,0.0976745798604895,-2.68834102608452  
"Sirpb1b",79.5225845922869,-1.41985866851233,0.511355676802278,-2.7766

557269713,0.00549213183018639,0.021323294787928,-5.46355247840523  
"Gm36079",0.10630803467366,-0.0765693605887282,4.78471990596623,-0.016  
0028929788035,0.987232083727802,NA,NA  
"1700001J03Rik",57.8845170433812,0.97343992049072,0.37859464412481,2.5  
7119305726314,0.0101348811625276,0.0341944822472681,3.28603236474937  
"AC149090.1",15679.7644281633,0.190224789016127,0.193313462304465,0.98  
4022461490686,0.325104469071504,0.470009026802552,0.143620358381547  
"Gm12537",7.05625741018271,-0.00439135027253994,1.42898388610803,-0.00  
307305793664349,0.997548058377127,0.998367315585527,-7.17554844679213e  
-06  
"Gm11239",1.00947054299541,2.76017817917862,1.89453859331953,1.4569131  
4439911,0.14514035720387,NA,NA  
"Gm13146",2.11737773567538,-1.08010072022853,1.69710908721812,-0.63643  
5647162207,0.524492512753857,0.657315767182992,-0.453200277969814  
"Gm3159",0.246596351355516,-1.2241526458149,4.77536275106619,-0.256347  
571824063,0.797682467088209,NA,NA  
"E030018B13Rik",0.968062802298258,-0.286601504937707,3.16555015746052,  
-0.0905376603375718,0.927859968204687,NA,NA  
"AF067061",0.458541441381959,-0.53361774681604,3.62458285728517,-0.147  
221837057333,0.882956924920034,NA,NA  
"Igha",8635.49333252941,-0.928765804784548,0.41226880444343,-2.2528161  
1117387,0.0242707459237583,0.0668405372911638,-2.51272530130521  
"Trav11d",1.68491711648198,-0.444153834436714,1.25517198075281,-0.3538  
58946222114,0.723444595068395,0.817580867944332,-0.0894550073667003  
"Vmn2r111",0.135606367615478,0,4.78471990596119,0,1,NA,NA  
"Vmn2r-  
ps17",0.203643613426002,-0.0690498537168282,4.784719905962,-0.01443132  
61954558,0.988485867299763,NA,NA  
"Ccdc85b",2282.59099933679,-0.172197088601104,0.212302753419248,-0.811  
092111749752,0.417312775513442,0.560576265722432,-0.0996659491962541  
"Gm13285",9.14768257088405,0.0943485557658932,0.714841665550358,0.1319  
85249759126,0.894995958663523,0.935139124485364,0.00632701080231384  
"Edaradd",294.081631578476,-0.0301751317199066,0.222622723014968,-0.13  
5543808427309,0.892181929706645,0.933349246991102,-0.00208135449275449  
"Itpripl2",2637.15513905364,-1.16218775947618,0.272129055123349,-4.270  
72279712798,1.94840464598178e-05,0.000282874116063684,-9.4956650590294  
6  
"Vmn1r198",4.57891821778429,0.431381009689982,0.802776659375596,0.5373  
61175928448,0.591018155613865,0.714247675601781,0.145170706610262  
"Trav6-7-  
dv9",2.25863662211954,-1.52725176837263,1.82444473202321,-0.8371049786  
08471,0.402533562175642,0.546331574223908,-0.923268303108586  
"Ighv1-82",10.2148252402055,-2.23744105346183,1.20521123624791,-1.8564  
7211556663,0.0633862939794645,0.139100276872436,-4.41348714863252  
"Gm5709",1.74816097579932,-1.42462267111143,1.63428459236481,-0.871710  
274799813,0.383366453537408,0.528117625807107,-0.909530747171837  
"Ighv1-39",24.1231184478993,-2.1167390815992,1.30148013170568,-1.62640  
906306043,0.103862664123044,0.203059683652974,-3.37462257366273  
"Mid1-  
ps1",22.218214936545,-1.06746328523668,1.41258678790227,-0.75567978858

2684,0.449841204874553,0.590639987383437,-0.562071304362095  
"Pou3f2",0.743493066161913,-2.42732774822227,2.65187098169878,-0.91532  
648645951,0.36002025836521,NA,NA  
"Tubb4b-  
ps1",0.264643566164137,0.870002234559233,3.96728935854673,0.2192938694  
23713,0.826421137177567,NA,NA  
"Gm4795",0.225594346540968,-0.550403870474713,4.78471990596057,-0.1150  
3366577196,0.908418437731403,NA,NA  
"Gm10718",2.70455989632426,-2.11859882237328,1.08865155266368,-1.94607  
615006799,0.0516455930088666,0.119202342055509,-4.50611748726573  
"Olfr1381",47.6358588393628,0.443738050819509,0.459719395851223,0.9652  
36739680904,0.3344262489496,0.479106759883857,0.326516580043042  
"Gm3005",6.20075354096375,-2.82605918697504,1.66047173144723,-1.701961  
63743897,0.0887625599221211,0.180130349017643,-4.84407606973017  
"Ighv1-59",1.99648256516199,-1.65253447165711,1.92631952820861,-0.8578  
7142135962,0.390963466453893,0.535361027383806,-1.03252657774722  
"Zfp967",577.382996248534,-0.226373876066351,0.212639150604621,-1.0645  
9170582029,0.287060734803817,0.431044297820934,-0.190503671103934  
"Ighv1-7",3.94322522790184,-2.26907294674982,2.25018273768242,-1.00839  
496666251,0.313264888331057,0.458389402827688,-1.76995911058435  
"Ighv1-52",4.07949587703312,1.17790787716606,1.51536893385983,0.777307  
658119786,0.436977277931457,0.578934766943504,0.643803775790398  
"CR974586.1",76.893279278332,-0.31376748891495,0.531484760286414,-0.59  
0360274386538,0.554949137721555,0.684445460642348,-0.118963787216256  
"Ighv5-9-1",4.09234761959724,-1.4773958485485,1.67592086048545,-0.8815  
42728766173,0.378024137646311,0.523134317076405,-0.957229926597154  
"H2bc15",1.56624398399579,-2.42302720459645,1.93580830722539,-1.251687  
57441143,0.210683729532949,0.344495679070232,-2.58215644196718  
"Gm10377",0.229977564889495,0,4.78471990595579,0,1,NA,NA  
"Ccl27.1",0.880079614911151,-0.0695383602818909,3.49872575560563,-0.01  
98753389488951,0.984142817926882,NA,NA  
"Zfp799",459.726521256968,-0.458997579959191,0.213175362322918,-2.1531  
4553688386,0.0313072424144588,0.0812199226058974,-1.1523568959735  
"Gm10593",204.989507815376,-0.287491880900869,0.416148747357341,-0.690  
839231708667,0.489666578153028,0.626190000710156,-0.134575362984378  
"Gfy",0.449704823831771,-0.70175749970893,4.69403758152845,-0.14949976  
1670086,0.881159297413863,NA,NA  
"Gm21738",1.80755506055023,0.701821081572284,1.83144914334857,0.383205  
334486708,0.701567523028467,0.801536344671323,0.155260342203301  
"Ighv5-9",5.779714220532,-2.3101867992947,2.17866906346242,-1.06036609  
140778,NA,NA,NA  
"Olfr117",0.729668381201114,0.391988779358468,1.97275786988606,0.19870  
0907669479,0.842496713964623,NA,NA  
"Gm7618",0.18301482170127,-0.0803997466396505,4.78471990596511,-0.0168  
034384916484,0.986593426765464,NA,NA  
"Gm12613",0.181637509693226,0,4.78471990596024,0,1,NA,NA  
"Gm21119",6.9473348041778,1.25378941284335,0.827263143101864,1.5155871  
7839429,0.129623771140565,0.239587097326642,1.79146228942443  
"Gm3488",19.9062191389975,-0.924323407398835,0.51786648123517,-1.78486  
818686203,0.0742826999427712,0.157138117831084,-1.71058074663759

"Gm12407",17.6513237399734,-0.661014719783146,0.64067605122268,-1.0317  
4563575718,0.302191292760115,0.446722005254968,-0.532658081679375  
"Gm906",25.5632810082028,1.6719386279328,0.964124262597798,1.734152632  
38767,0.082891004922987,0.170828539688025,2.95447425161502  
"Plac9a",199.143903056629,-0.973628532164344,0.352564419568702,-2.7615  
6208092524,0.00575255790071113,0.0220794043204853,-3.71255272750322  
"Gm12573",50.2398642148234,-0.409147297197686,0.421208883523537,-0.971  
364359115713,0.331366870113585,0.476193339731329,-0.303559198912449  
"Gm10130",121.908391616525,-0.312137449333495,0.235652610859664,-1.324  
5660559194,0.185315120500508,0.313714551830429,-0.361852135598568  
"Gm8024",101.926207226983,-0.75757042175871,0.730505252493487,-1.03704  
993108926,0.299712587690258,0.444091194983255,-0.614939110853259  
"Ccl21a.1",5.45236570775156,-4.59152220701731,3.90617652098979,-1.1754  
5179598127,0.239814011604579,0.378033276600054,-4.46650907938725  
"Zfp870",344.468763293503,-0.249831579918263,0.12806236406046,-1.95085  
872224188,0.0510738541022976,0.118298646624685,-0.533276237167263  
"Igkv3-5",7.3863899829618,-3.318511121808,2.00745770645895,-1.65309142  
560302,NA,NA,NA  
"Igkv3-9",0.20831405073542,-0.564230083518256,4.78471990595351,-0.1179  
23325630033,0.906128411016941,NA,NA  
"Igkv3-2",94.4309353680638,-2.44959349766765,1.43592826567493,-1.70593  
027257965,NA,NA,NA  
"Gm14325",294.830266711152,-0.724197925854906,0.373995161865052,-1.936  
38313994077,0.052820792881848,0.121264549583218,-1.52789885025642  
"Rbm31y",0.132112882731837,0.399965068482464,4.78471990596623,0.083592  
1592784843,0.933380701107226,NA,NA  
"1700001F09Rik",2.68808782093728,-4.33234773189335,1.63068045481167,-2  
.65677295579881,0.00788925557023056,0.0281988460326958,-15.45987120504  
18  
"Trav6d-4",0.0810438812552173,-0.544048378937456,4.78471990596623,-0.1  
13705376621746,0.90947135024012,NA,NA  
"Gm10681",14610.5921243335,2.3652059695539,0.791594820636555,2.9878997  
5362893,0.00280901673977649,0.0128719643694858,10.2950406267816  
"Olfr804",170.125496734068,0.637836455252724,0.41125914769121,1.550935  
60552637,0.120917116618375,0.227923621406137,0.943197277661162  
"Gm21092",44.3049970175985,-0.215772610369888,0.304822258602234,-0.707  
863695254133,0.479029906882583,0.616469218163594,-0.104379328697992  
"Tmem200c",5.388423859302,-2.00215282437841,0.903907038025837,-2.21499  
860068705,0.0267601605684765,0.0721573241272513,-5.26347254679066  
"H2all1e",0.114810471722162,0,4.78471990596601,0,1,NA,NA  
"Ighv1-12",2.52396239287672,-1.25154329481678,2.07621320144308,-0.6028  
00952208034,0.54664111323991,0.67654069058522,-0.489056417644851  
"Trav6d-5",0.319972260687212,-0.512750548353348,4.78471990594875,-0.10  
7164172288509,0.914658738079078,NA,NA  
"Rps2-  
ps6",13.5531391630125,0.511204016675708,0.572321320704773,0.8932115547  
36764,0.371743891440653,0.516957591848645,0.337289565459733  
"Ighv5-12",0.633871203590873,2.10721780097034,4.25255395358584,0.49551  
8181302201,0.620234391355822,NA,NA  
"Vmn1r72",54.9699294417499,0.123517657766984,0.2821226081513,0.4378155

24875422,0.661520015946845,0.770094768101474,0.0322679624320112  
"Zfp748",446.528259968219,-0.0629366018577318,0.113367404411617,-0.555  
156062577034,0.578787918958212,0.703654248899315,-0.0221202121039411  
"Figl2",1335.49513848054,0.171962372876072,0.154536017044701,1.112765  
65919471,0.265809087731377,0.407616733903639,0.154323835254477  
"Ighv1-4",1.55958757725779,-0.742202010783464,2.25627876147973,-0.3289  
49606517906,0.74219377828129,0.831970466191134,-0.136534246996403  
"Olfr859",12.6520533459843,0.442659607526019,0.445154010676167,0.99439  
65389723,0.320029852456939,0.465181307828045,0.338779809851372  
"Il11ra2.1",9.95462662751892,0.028977192782799,1.46545905481638,0.0197  
734578032477,0.984224091347924,0.989764212706224,0.000298132810100207  
"Gm8989",14.0683852578153,0.73528621264283,0.632556623930912,1.1624037  
8303767,0.245071487349602,0.384270515508045,0.703233988811911  
"Entpd4",10156.957656383,1.11075156728339,0.220710166765533,5.03262529  
117372,4.8380820396798e-07,1.53137863002722e-05,12.3146327914865  
"Gm21987",0.257082569967021,0.817979594861416,4.78471990595071,0.17095  
6630887443,0.864257867026244,NA,NA  
"Gm21863",0.181322326650502,-0.0276824360780595,4.78471990596159,-0.00  
578559176338999,0.995383791410011,NA,NA  
"Clcn3a2",1.17144136751171,-2.21949012088582,1.75045330164755,-1.2679  
5163218396,0.204815223863936,NA,NA  
"Gm9824",0.610812171127952,-0.539132171719401,2.25162992110902,-0.2394  
40845347204,0.810763760936381,NA,NA  
"Vmn2r22",0.299038691716825,-0.99806227580493,4.7813751971851,-0.20873  
9585295986,0.834651536178045,NA,NA  
"Gm7951",3.66372318123021,-3.34216066875188,1.66539710356969,-2.006825  
07588619,0.0447682918415002,0.106814996858244,-7.4752668620225  
"A630023A22Rik",2.94335292094749,-4.24736520043105,2.04121496160338,-2  
.08080250259126,0.0374519870113297,0.0931713420543046,-10.080335936781  
5  
"Trav9d-3",0.406528469303961,-0.54345665414756,3.78385429202211,-0.143  
62515366762,0.885796476835367,NA,NA  
"Ighv1-122",2.20344000311651,0.396712718235891,2.6622063688241,0.14901  
6516105444,0.881540600508059,0.926142498448523,0.0304386442373846  
"Gm20812",0.297576871128694,-0.0731620741072367,4.78471990595631,-0.01  
52907747047346,0.98780020234352,NA,NA  
"Gm17222",0.113970598328157,1.37049170653507,4.78471990596623,0.286430  
916222736,0.774548098442225,NA,NA  
"D13Erttd608e",0.668645528521679,-0.683287478731137,4.4331739049749,-0.  
154130537934538,0.877506810184071,NA,NA  
"Ighv1-66",6.69379560641467,-0.181038213062884,1.57725171482527,-0.114  
780799641064,0.908618868126622,0.943859919591523,-0.0104599379098309  
"Gm20877",1.62936057509381,0.536272682768237,1.48815974213934,0.360359  
622413455,0.718578217709019,0.813637519680049,0.110601049528057  
"Gm15682",0.705176739534885,-0.637292558318475,1.74777124454264,-0.364  
63156165797,0.715386451801918,NA,NA  
"Gm10413",0.227176497313788,2.81872753586267,4.70865827538772,0.598626  
481474824,0.549421992833571,NA,NA  
"Gm21983",26.9900413298015,0.265338588214575,0.72571529911673,0.365623  
528314092,0.714646015919038,0.810691646403851,0.0556859491387929



"Zfp969",6.39447252288845,2.02338774735192,2.37927424497887,0.85042224  
603658,0.395090372342565,0.539421054543473,1.24895396524714  
"Gm10719",2.03761479534831,4.54636713121949,1.39253355297138,3.2648169  
3853515,0.00109534843143143,0.00630747304077083,23.0319875033873  
"4933409K07Rik",0.611292026240222,4.50970943248844,4.6614159189528,0.9  
67454848676442,0.333316702235874,NA,NA  
"Trav14d-2",1.45049911683735,-2.75056691321337,1.71536422128664,-1.603  
4885647494,0.108826831787067,0.210110463034384,-4.29121960201268  
"Gm20474",0.160422850020184,-1.15808576265244,4.77648340949229,-0.2424  
55728067847,0.808427057418794,NA,NA  
"Ighv2-9-1",2.50800257936738,-2.93321401637227,1.79709407258165,-1.632  
19837020469,0.102637704016047,0.201249995263966,-4.70255037640194  
"Noc2l",3396.55730558159,-0.0405622796496606,0.13859058810404,-0.29267  
7015117437,0.769769040228963,0.851040867905665,-0.00654249809499743  
"Ighv5-17",8.90707552509904,-1.5448544950954,1.03618874616138,-1.49090  
066922498,0.135987575661995,0.248499133107552,-2.15092551062096  
"Trbv12-1",4.09998231418829,-3.01695707623153,1.3174913131093,-2.28992  
55928386,0.0220256303489603,0.0620959717385813,-8.38434745081634  
"Fmo6",0.658847059866464,-2.03852537779232,2.45829640388555,-0.8292431  
1916588,0.406966850130005,NA,NA  
"Ighv14-2",9.37256842509713,-0.884635071397978,0.717962773198905,-1.23  
2146156348,0.217894492328607,0.353188694939162,-0.920686443722788  
"CR974586.2",0.634031315229334,-2.54113221562201,4.73757947420223,-0.5  
36377749325232,0.591697506128098,NA,NA  
"Gm12350",2.51400793611261,-0.711533275246519,1.16973205403269,-0.6082  
87404618419,0.542996873263308,0.673538586098859,-0.281205060634516  
"Ighv1-55",15.1583079705447,-2.60611562858796,0.935820734602132,-2.784  
84493047268,0.00535533276329471,0.0209546329464916,-10.0736676597923  
"Fam177a",2053.3718774658,-0.339260140542363,0.178117933155907,-1.9046  
9389876318,0.0568198725636723,0.128285534419463,-0.696669600015521  
"Gm6472",266.939544045214,6.0687643652158,1.94837623090412,3.114780538  
25347,NA,NA,NA  
"Trav5-4",1.10053759104466,-0.614979635630836,2.38581975936324,-0.2577  
64499274233,0.79658866429421,NA,NA  
"Gm21188",459.079322855732,-1.18636235955853,0.469514777670151,-2.5267  
8385427091,0.011511232370925,0.0378301042926505,-3.88492159974711  
"Ighv5-4",2.83233138221421,-0.129815457884098,1.30377723571136,-0.0995  
687409845507,0.920686711547741,0.951226658634901,-0.00649115035588737  
"Csta2",4.66044241176326,1.10604231587392,0.836159792993153,1.32276429  
115861,0.185913775750301,0.314483986250319,1.27949421915974  
"Igv6-23",35.3484531531817,-2.44799909277814,0.953703775489611,-2.566  
83380698728,0.0102631788748174,0.0345496308185754,-8.23839434495798  
"Vmn1r175",0.479210903802488,-1.01012950075584,2.77932281695781,-0.363  
444467333058,0.716272889296407,NA,NA  
"Igv4-58",6.11514201239576,-0.274901581905387,1.48899984388384,-0.184  
621632456554,0.853525817371591,0.90672585742134,-0.0269170231866996  
"Ighv14-3",7.77620256021281,-3.08562271869693,1.77204840563193,-1.7412  
7450970876,0.08163547209391,0.168937426755154,-5.48693728617607  
"Trav10n",0.67067744690389,-1.01619832490768,1.94733026814552,-0.52184  
1796191782,0.60178048598092,NA,NA

"Gm2004",35.5242410896349,0.413778380518739,0.6664146991851,0.62090224  
1539259,0.534663946241301,0.666636878171889,0.167791184955619  
"Gm8979",57.1011610313615,0.0131230201467015,0.397028983170706,0.03305  
30533108691,0.973632280304597,0.983824740950406,0.000214003737436111  
"Plscr5",0.218437895211574,0.883755145864143,4.78471990595392,0.184703  
632236535,0.853461497085853,NA,NA  
"Gm8935",2.01923665755326,-4.13840913542229,1.47244778730402,-2.810564  
26659415,0.0049454711154811,0.0197151494192702,-16.2489169217874  
"Vmn2r67",2.79691295609977,-0.317346679736189,1.08221504827888,-0.2932  
38095553085,0.769340167225856,0.850807928113535,-0.0512733467526728  
"AC133103.5",0.273737508735305,-0.547374734044845,3.98017418503737,-0.  
137525321404924,0.890615579308548,NA,NA  
"Ccl21b",39.349125388197,3.16297447883278,4.56619259327457,0.692694058  
391547,NA,NA,NA  
"Dynlt1f",1408.29623644836,0.12560468839809,0.172785973550882,0.726937  
990490886,0.467263943142006,0.605720040137108,0.0629703253507682  
"Gm8281",30.8682066978735,-1.19833962498522,0.646908657152053,-1.85240  
931889949,0.0639670681484512,0.139983699683557,-2.35621047478674  
"Igv3-1",2.79998925308118,-1.12526683778558,2.06343950394139,-0.54533  
5511720212,0.585522784520574,0.709277041040144,-0.386539375947614  
"Gm3099",0.10500178835157,-0.544048378937456,4.78471990596623,-0.11370  
5376621746,0.90947135024012,NA,NA  
"Rnaset2a",4366.22713027899,-0.0534450759386229,0.257780050753954,-0.2  
07328207835739,0.835753546047414,0.895112476837818,-0.0059220295346602  
3  
"Trav12d-1",0.422853489720594,-1.42970165067654,3.81217142815421,-0.37  
5036033300521,0.707633668502918,NA,NA  
"Ighv10-3",35.574781520205,-5.39829969526034,1.33355678076517,-4.04804  
637727003,5.16469143797186e-05,0.000592359727397502,-40.1169052453359  
"Gm8221",8.62278437545673,-1.93231654616978,0.891270210312438,-2.16804  
794305017,0.0301550389777568,0.0789954252301896,-4.9049253402722  
"Gm8871",0.491144619602065,-0.24253081001774,4.78471990595146,-0.05068  
86118278457,0.959573651429387,NA,NA  
"Trav14-2",0.8195330977088,-3.38641487628635,3.40501563468624,-0.99453  
7247285914,0.319961381100991,NA,NA  
"Gm21319",0.171037364240286,1.39868548214374,4.78471990596252,0.292323  
377257832,0.770039386562616,NA,NA  
"Vmn2r29",49.275506338276,0.590623917519893,0.533153635840134,1.107793  
09717958,0.267951181916263,0.410156639910441,0.52637357013944  
"Trav7n-4",0.396564243078291,-0.857546487504009,3.13355961958271,-0.27  
366528536585,0.784341857879866,NA,NA  
"Igv11-125",0.992509221288903,-3.40485996081877,4.19020224609987,-0.8  
12576520378683,0.41646089789181,NA,NA  
"CAAA01147332.1",1326.41595707903,-0.853741306154334,0.239134755590114  
, -3.5701264086333,0.000356809001722595,0.00264527069033732,-5.06693918  
096665  
"Igv4-53",23.4338769372779,-2.48344788007705,1.32190840991678,-1.8786  
8377373694,0.0602876847006158,0.134035265255713,-4.99086684372616  
"Trav6d-7",1.54762184815358,0.0199674211410269,1.18920195344614,0.0167  
906057361949,0.986603664378591,0.991307222479141,0.000174331163219281

"Ighv1-20",1.58618305553085,-2.68705463909846,2.96470594350158,-0.9063  
477762401,0.364751805216904,0.509706206415767,-1.81086197200096  
"Gm16378",10.8274331999308,0.67282929057977,0.440151937085205,1.528629  
62511403,0.126356287506247,0.235332399827759,0.973420012886685  
"Gm21182",1.21250493279142,0,4.01503479111246,0,1,NA,NA  
"Igkv14-111",18.6593372316247,-2.44389536366138,1.06254228788052,-2.30  
004527023227,0.021445655433714,0.0607468534058006,-6.84544865450329  
"Vmn2r38",0.358037658250064,0.420072686040543,3.19089967832418,0.13164  
7099059272,0.895263430036695,NA,NA  
"Gm2163",7.899048875274,-0.697294739428646,0.914707059498069,-0.762314  
811270042,0.445872136081573,0.586970151192932,-0.371505604870759  
"AC133103.6",16.284903657946,-1.13124510572097,0.727325137849012,-1.55  
534993478502,0.119862750805462,0.226338262552156,-1.68071875205108  
"Sirpb1a",204.951413580846,-1.20597119573831,0.416525580523033,-2.8953  
1124168643,0.00378782759504864,0.0161220393905825,-4.97772816088195  
"Nupr1l",96.657335162136,0.0190978163996842,0.348066147537656,0.054868  
3534287635,0.95624334418937,0.973298916065444,0.000516863937467496  
"Igkv6-17",35.6149366636989,-3.58005883956935,1.18869206634914,-3.0117  
6304689647,0.00259735256761718,0.012176768541332,-15.7817061686516  
"Gm8246",0.818483516205535,-0.981106098934677,2.97790108989359,-0.3294  
62285454798,0.741806295987081,NA,NA  
"Olfr824",0.105560133106079,0.129293876548044,4.78419525154962,0.02702  
52089954241,0.978439627501202,NA,NA  
"Olfr1290",0.435272495389516,0.965951861973591,2.99700469804672,0.3223  
05755010376,0.747221073711003,NA,NA  
"Gm5473",0.412380628820512,-0.0624476375220244,3.04202645181317,-0.020  
5283019432007,0.983621935144707,NA,NA  
"Speer1",0.204659760757107,-0.352125484989113,4.78321759419085,-0.0736  
168652282857,0.941315251041093,NA,NA  
"Gm21960",5.65586454288181,-1.2589507567332,0.808160154211931,-1.55779  
859990852,0.119280998022779,0.225449873928668,-1.87540535294369  
"Gm8532",0.12373001379622,-0.995441794986523,4.78130785843833,-0.20819  
445734491,0.835077136172818,NA,NA  
"Gm5741",17.3694331983344,0.794331096035165,0.45359560184984,1.7511878  
2632756,0.0799135617165881,0.166167711032317,1.42563184557224  
"Gm5451",0.381285856425664,1.34912722666918,3.80498887648106,0.3545679  
81790498,0.722913266431199,NA,NA  
"Gm10256",1.02231850603374,-3.69714358479924,4.7232372368708,-0.782756  
274857081,0.433770248828687,NA,NA  
"Trav14d-1",0.9745274537794,-0.290447875999404,1.52754986820632,-0.190  
139701521139,0.849199660203292,NA,NA  
"Ighv1-43",0.264241680616877,1.52064588844894,4.73232140847224,0.32133  
1912436577,0.747958875044899,NA,NA  
"Vmn1r77",1.75489675909331,-0.582467958142173,1.10109623972369,-0.5289  
89144752994,0.596812980218534,0.719305337063229,-0.191905335100218  
"Gm13237",1.17852072154881,1.16256991587999,1.85729415360884,0.6259481  
91147341,0.531348923902699,NA,NA  
"Ighv2-4",0.0721532113593249,-0.544048378937457,4.78471990596623,-0.11  
3705376621746,0.90947135024012,NA,NA  
"Gm20917",0.166912806642507,-1.3789059380214,4.76930758512479,-0.28912

0781876626,0.772488950759831,NA,NA  
"Ppp1r2-  
ps6",5.37791688798789,-0.051031650176532,0.705174766979903,-0.07236737  
97845724,0.942309543868447,0.964216819015848,-0.00185954708091007  
"Ighv1-58",2.98076012428135,-5.18883550533786,2.48581941703462,-2.0873  
7427577411,0.0368543154211471,0.0920555267847202,-12.3772579501583  
"Gm10717",1.01115358629108,0.648923634513366,1.70045281381205,0.381618  
136794175,0.702744629393388,NA,NA  
"Vmn1r191",15.5193914513367,-0.907052681850571,0.649911747839856,-1.39  
565515605063,0.162818364444865,0.285001568358558,-1.13858748976567  
"Olfr740",15.7895240383151,-0.176106241922451,0.386316775903287,-0.455  
8596802085,0.648490884951004,0.760420692493064,-0.0482325861778001  
"Gm5861",0.826670589616218,-2.49022989539122,4.28448592797147,-0.58122  
0229744166,0.561092035127009,NA,NA  
"Olfr204",76.7300533875325,0.266944913158052,0.249124547623228,1.07153  
195341382,0.283930311162413,0.427925578344649,0.226584438857236  
"Nim1k",216.788408184611,0.12206416562005,0.312804381524609,0.39022524  
24506,0.696369997505533,0.797475755395447,0.0276235900828529  
"Vmn1r49",1.03884437187968,1.43339489043222,1.48588081541244,0.9646768  
94380894,0.334706671707089,NA,NA  
"Tle7",0.236081607975423,0.4.78471990595917,0,1,NA,NA  
"Gm21708",0.251331031128429,0.4.7847199059551,0,1,NA,NA  
"Trav12-3",0.363525319880968,-1.57743182964017,2.70342505530288,-0.583  
493826302294,0.559560911878366,NA,NA  
"Vmn2r102",37.1552830885389,0.900260694511061,0.49728985461019,1.81033  
392530549,0.0702440190865147,0.150469102713298,1.70509151686585  
"Cphx1",7.81461278422023,0.74028073083136,1.40688921068245,0.526182676  
795331,0.598761288994824,0.720794819447438,0.242368473843069  
"Gm5891",147.368732969581,2.2458662036717,0.535173270998141,4.19652162  
276898,2.71045595509236e-05,0.00036049060197053,17.8053275878185  
"Ighv10-1",14.098577559193,-1.20973737614962,1.45198485809088,-0.83316  
1151377448,0.40475384916811,0.548581297864577,-0.726350263421892  
"Zfp97",442.790751559663,-0.232133595893041,0.101789990600422,-2.28051  
495558424,0.0225771648127284,0.0632303302956878,-0.64091416891497  
"Gm21060",0.135353711384865,-0.068303003578921,4.7847199059647,-0.0142  
752355250249,0.988610396807421,NA,NA  
"2610528A11Rik",8.62737872285231,-0.425897737394673,0.612112617409943,  
-0.695783300786693,0.486564548715295,0.623531749645141,-0.201175178523  
474  
"Vmn2r53",1509.59459250633,0.421127746473668,0.161642795646464,2.60529  
85831471,0.00917942268117007,0.0316611327503014,1.45401321884356  
"Gm3500",27.2921973523234,-0.550018091729168,0.968096926679663,-0.5681  
43619271261,0.569937451426924,0.696804641831087,-0.198694141144686  
"Gm21596",53.5565217559219,0.827754751873093,0.475468126048289,1.74092  
585080882,0.081696576734804,0.16901006399737,1.47157992748882  
"H4f16",59.9858665533077,0.886326736524578,0.224798719517923,3.9427570  
513982,8.05502422637328e-05,0.000836298521649767,6.28097651034613  
"Sox1",0.14728986473751,0.4.7847199059615,0,1,NA,NA  
"Ighv1-75",7.24238461783086,-5.70908941680913,1.85388076940688,-3.0795  
3429962793,0.00207324496153893,0.0102651422702097,-26.1419282545666

"Olfr679",1.8588182252227,1.20715332760433,1.27188324024056,0.94910703  
2321626,0.342566178117959,0.48711751319603,0.868244891828114  
"Odaph",2.45666742859927,-1.75839041250134,1.35194272505922,-1.3006397  
2379031,0.193381803202011,0.323647020064466,-1.98364339175081  
"Gm21778",0.189426490028376,0.887717411352168,4.78471990596491,0.18553  
1740373243,0.852811987180574,NA,NA  
"D830030K20Rik",46.3770240418379,-1.18899252098757,0.380749587027428,-  
3.12276772319104,0.00179159079241166,0.00918515849937256,-5.5765726578  
0556  
"Syne1",1839.12833705586,-0.516372819401723,0.267708108476259,-1.92886  
507002277,0.0537476151758412,0.122799507932804,-1.08293824919063  
"Ighv1-72",25.5945213220604,-4.48734412453515,1.13748656270371,-3.9449  
6451357554,7.98117971749451e-05,0.000829957558035776,-31.8338294685368  
"Ighv1-62-2",5.17636190374054,-5.06459491487991,2.01895858964787,-2.50  
851847127941,0.0121238629287102,0.0392612725468597,-16.3967105009014  
"Gm4761",0.900890059244374,-1.22110731610449,1.81861217723706,-0.67145  
0093312179,0.501933842238094,NA,NA  
"A630095N17Rik",0.131658174981612,-0.119435046249286,4.78471990596623,  
-0.0249617634044489,0.980085462480959,NA,NA  
"Trav4-4-  
dv10",1.15864921641835,-2.47427239908471,1.75253025868137,-1.411828632  
8171,0.158000425482269,NA,NA  
"Vmn1r220",124.010431059295,-0.033917452556666,0.271303821767065,-0.12  
501649381772,0.900510492603925,0.93908935041939,-0.00213153041563772  
"AC133103.7",0.962422972309337,-1.40076477090606,3.3855470056078,-0.41  
3748433734886,0.679058352340187,NA,NA  
"Trav5d-4",0.388515426345231,-0.847056038435754,3.17880633387883,-0.26  
6469847315977,0.789877378510437,NA,NA  
"Gm16505",300.40445488884,1.69814530087468,0.431817560713186,3.9325526  
6893277,8.40485566255307e-05,0.000863424002678924,11.9797437784566  
"Ighv11-2",1.05604052718922,-3.15171891705351,2.7137379898277,-1.16139  
396244868,0.245481723153723,NA,NA  
"Olfr1537",0.179573169302745,-0.0550828742784305,4.7847199059642,-0.01  
15122463510913,0.990814759266192,NA,NA  
"Trav12d-2",0.870680171797832,-0.853460511473258,2.04043407502481,-0.4  
18273994695409,0.675746800825411,NA,NA  
"Trav7-6",0.288842599236804,-0.569461245533063,4.78471990594862,-0.119  
016631428117,0.905262179461327,NA,NA  
"Ankrd66",12.807528401548,-0.480619084620864,0.542314426514987,-0.8862  
36952443643,0.37548985512115,0.520533323508865,-0.313796859212973  
"Dnah7a",8.84176339307992,-0.252222722198824,0.629878967164941,-0.4004  
30456241567,0.688839495721712,0.791408431299389,-0.0590052601774114  
"Vkorc1",1964.03497579555,0.21362823261767,0.200245992727452,1.0668290  
0220846,0.286049059610972,0.430154601596076,0.180219040708849  
"Kcnj11",50.5586023589629,-0.183717644651945,0.325895139557725,-0.5637  
32386132758,0.572936273167602,0.699112050455091,-0.0657606742538728  
"Trav6-5",1.85289315470894,-1.30866203658099,1.74607493166171,-0.74948  
7901607728,0.45356318796634,0.59400290163088,-0.681644201453537  
"Ighv1-85",4.0709909772955,-3.0050175784038,1.85105961644854,-1.623403  
99612264,0.104503071033426,0.203946922211882,-4.77766393802986

"Olfr477",12.9615800426041,0.782389806988416,0.517211582766686,1.51270  
743552035,0.13035399003873,0.240549129072038,1.11477319741903  
"Gm9242",0.507726851750136,-0.0597109891118021,3.63227092942294,-0.016  
4390240353817,0.986884147271473,NA,NA  
"Olfr887",4.67159691573775,-1.23333168990357,0.865660451722043,-1.4247  
2916193656,0.154235506005944,0.273855949114857,-1.59735329243738  
"Olfr1564",11.8551483296395,0.59837536589554,0.506294808875754,1.18187  
142235223,0.237256722792227,0.375436036989575,0.586208697232174  
"Gm8055",0.178959236751491,-1.4721567640892,4.76569419891034,-0.308907  
097821299,0.757392197417662,NA,NA  
"Gm21761",2.73821147588397,0.135964265623855,0.95702095283191,0.142070  
312276366,0.887024467653379,0.929849627435784,0.00988900692307169  
"Gm5070",0.0975946812975006,0,4.78471990596623,0,1,NA,NA  
"Gm3727",0.125389511021088,-0.0729670170331964,4.78471990596623,-0.015  
2500080395952,0.987832725644036,NA,NA  
"Cmtm4",4900.94858353394,0.098507577230406,0.259812958748877,0.3791480  
52140151,0.704577924960454,0.803759675923176,0.0215194693389741  
"Gm18856",0.154958342395353,-0.0596598746367511,4.78471990596056,-0.01  
2468833246107,0.99005156824581,NA,NA  
"4930555G01Rik",0.261214943039874,-1.12608885172801,4.77858296708229,-  
0.235653301299817,0.813701709521898,NA,NA  
"Ptrhd1",374.387240063053,0.129918547059746,0.195305118564507,0.665208  
101122219,0.505917399683595,0.64066879645585,0.0578452786697836  
"Olfr510",0.65089152446992,0.741209863376232,2.34471646513995,0.316119  
187286038,0.751912043597853,NA,NA  
"H1f0",8494.08170433456,0.0820725406562074,0.129458311322906,0.6339688  
80155519,0.526101131561476,0.658699021587726,0.034264347528556  
"Smim22",1204.87277486727,1.42892482910148,0.294910515288842,4.8452827  
3839934,1.2643149834168e-06,3.30450583735399e-05,14.7431298625758  
"Gm2916",0.386656236195895,-2.42168505208837,4.73984729662781,-0.51092  
047919166,0.609406740457842,NA,NA  
"Olfr775",412.292296373607,0.418050253471331,0.305087301594244,1.37026  
435150462,0.170604396781118,0.295185422702834,0.510084672511231  
"Lhx8",0.221315529724395,-1.08784722257213,4.77929796486543,-0.2276165  
30831377,0.819944367519333,NA,NA  
"Olfr774",61.297106775715,0.489964250929054,0.28910132723923,1.6947838  
1717567,0.0901164384877183,0.182167111221917,0.834326227013688  
"Gm13238",7.11913380003371,0.0799221094408226,0.638460286540277,0.1251  
7945301486,0.900381483401304,0.939025643224746,0.00502809899634932  
"CT868723.1",0.394038417477957,-0.0613728855779589,4.7702271538495,-0.  
0128658203474507,0.989734843780898,NA,NA  
"Dynlt1b",1635.35502128147,0.468135621733846,0.14793058972724,3.164562  
66818791,0.00155316210408098,0.00826516231041782,2.24504076765166  
"Gm21093",5.39089019973415,-1.56517899230217,1.56103961459125,-1.00265  
168011896,0.316028951336522,0.461326083189302,-1.21090095783001  
"Ccer2",0.59936063325663,-0.822694503674699,2.13624579422993,-0.385112  
287123898,0.700154224983254,NA,NA  
"4930467E23Rik",0.513877004473408,3.31034278728296,4.67710548188522,0.  
707775952478338,0.479084402142697,NA,NA  
"Rpl31-

ps21",0.289956842366276,-1.41909754331995,4.76797156869952,-0.29763129  
3071452,0.765984587969674,NA,NA  
"Ccl21b.1",458.045244456375,-1.80208198234258,2.5752274621028,-0.69977  
5848487997,0.484067299810333,0.621714111490683,-0.856484369509597  
"Gm2042",0.139896150021884,0,4.78471990596454,0,1,NA,NA  
"Olfr1484",0.152156232640541,0,4.78471990596498,0,1,NA,NA  
"Gm10302",2.78901293594266,-0.367469087106195,1.58822866337728,-0.2313  
7039116571,0.817027065568224,0.882814836489289,-0.0458012729968992  
"Olfr1471",1.0246614427502,-1.20727872262428,1.60106694870318,-0.75404  
6371141532,0.450821377940081,NA,NA  
"Gm20767",0.075639876379962,-0.0576803413727874,4.78471990596623,-0.01  
20551134666971,0.990381644052576,NA,NA  
"Ighv1-78",4.38386058552975,-3.12160343643927,1.54260940637307,-2.0235  
8641373689,0.0430127241106796,0.103673705672007,-7.07513528262229  
"Gm21976",0.142363832118429,-0.0615355777044098,4.78471990596623,-0.01  
28608526546515,0.989738807098375,NA,NA  
"Igkv1-135",59.3705340116642,-1.41375793199331,0.952794977281922,-1.48  
380078159773,0.137861779707069,0.251344203997431,-1.95230349587405  
"Samd11",11.7583066710006,-0.497905340845685,0.748314354262211,-0.6653  
69223521828,0.505814364711366,0.64057992226177,-0.221757769996562  
"Gm8178",3.15700569900284,1.98750791849458,1.17452409811281,1.69218147  
306474,0.0906113778916209,0.182987120262126,3.37546322381868  
"Olfr889",37.7073376917912,0.193975123692158,0.428435240291968,0.45275  
2494309218,0.650726974892291,0.762051070880455,0.0527111305271111  
"Olfr1463",0.217776054892566,0,4.78471990596365,0,1,NA,NA  
"Gm21992",463.543359929862,0.923749134197593,0.278969769656977,3.31128  
758264181,0.000928677156345404,0.00555269769838169,4.79746470695563  
"Gm8138",20.4601514584262,0.612148635705536,0.556871920070405,1.099262  
88908254,0.271653414537813,0.41412809043458,0.539657967223796  
"Vmn2r31",39.5187081103218,0.274980174369369,0.293664913167871,0.93637  
3948808037,0.349080686100288,0.494038993800059,0.193899748413514  
"Gm7094",0.121546224604879,1.3719086877618,4.78471990596623,0.28672706  
3385909,0.774321313678794,NA,NA  
"Gm11168",0.849897713403115,0.250176827619166,2.57375045460085,0.09720  
32184285578,0.922565012214471,NA,NA  
"Trav17",0.612085294683258,-0.112611078427849,2.38887199773154,-0.0471  
398545149277,0.962401763319277,NA,NA  
"Gm21811",164.031540913319,-0.0926332757824125,0.238045720758677,-0.38  
9140688970086,0.69717207549068,0.797943472534031,-0.0209089533221443  
"Gm9825",1.73647294525964,-0.400228210072226,1.32388376646302,-0.30231  
3707752081,0.762412929662387,0.846026253631394,-0.0669201127178615  
"4930474N05Rik",15.15776724236,0.275084995724329,0.470399420450235,0.5  
84790252209571,0.558688759551617,0.687492170005518,0.103075678921181  
"Olfr890",26.9420435798922,0.186254846656679,0.518297570963128,0.35935  
8903246586,0.719326614610264,0.81414043269295,0.0382981697217935  
"Ighv1-19",7.53917151003467,-2.50149897482566,0.932982523023273,-2.681  
18524527094,0.00733618924852461,0.0266906232383397,-9.0640388618683  
"Trav7-2",1.57354789839241,-2.35671454772334,2.10696528034056,-1.11853  
506543896,0.263338538980006,0.405286512986988,-2.12849272070699  
"Igkv12-44",22.2333473696527,-2.26557293155986,0.760669146790944,-2.97

839466884873,0.00289762604839102,0.013172747188512,-9.8090363240731  
"Olfr895",0.547781192224141,-0.852679336860144,2.71486045436237,-0.314  
07851386616,0.753461407884907,NA,NA  
"Zfp994",602.731895363171,0.199370338606807,0.115523239690227,1.725802  
86998021,0.0843828833434233,0.173243914860489,0.349507122092202  
"Olfr1437",9.26736363571105,0.47517455965469,0.520923713002982,0.91217  
6865428987,0.361675620263051,0.506423787711954,0.323299948821198  
"Gapdh-  
ps15",0.632571595944085,0.0166305942057804,4.64798031559624,0.00357802  
595462306,0.997145154424073,NA,NA  
"Vmn2r-  
ps20",0.309167686622159,-0.583102859997148,4.76440514896109,-0.1223873  
37299452,0.902592266491967,NA,NA  
"Gm8104",35.0423469157162,-0.127929988552116,0.556564138304628,-0.2298  
56686314373,0.818203134478074,0.883341465557035,-0.0158688761689314  
"Gm4076",0.274698309257133,1.36763531360099,4.78471990596054,0.2858339  
33956566,0.77500531637739,NA,NA  
"Ighv1-77",1.563662148428,2.74771096129081,1.84616705326108,1.48833279  
005669,0.13666315161618,0.24954655649113,3.81412446357305  
"Moap1",104.742415865155,-1.57653058714118,0.389808288539686,-4.044374  
20519517,5.24630677693664e-05,0.000599253014274813,-11.6975836722363  
"Ighv9-3",20.6957965401106,-0.898971028631089,0.979034315018874,-0.918  
222185719567,0.35850255594987,0.503571993077629,-0.616719828828638  
"Igkv14-130",0.113465871819465,-0.080907519642842,4.78471990596623,-0.  
0169095623637145,0.986508764195384,NA,NA  
"Gm21750",624.251648025721,0.711182378321811,0.336171922423379,2.11553  
175885444,0.0343846510795715,0.0872844586316216,1.73427715422069  
"Ighv2-2",6.84789906778703,-1.44793385405298,1.44265028753155,-1.00366  
24028478,0.315541364914959,0.460771351898851,-1.1219363856508  
"Olfr488",0.259645692796247,0,4.78471990595491,0,1,NA,NA  
"Gm9603",0.575321672373004,2.80341616039688,4.37184598140527,0.6412431  
20713909,0.52136473773512,NA,NA  
"Cdkn2d",514.254168522282,-0.15428381243169,0.138593010972362,-1.11321  
495470256,0.265616121394069,0.40753723126704,-0.138488696314176  
"Olfr92",0.100532412451372,0,4.78471990596383,0,1,NA,NA  
"Trav9d-1",0.240920081610596,-0.53920598541493,4.78471990595018,-0.112  
693322914134,0.910273695070104,NA,NA  
"Gm10409",12.6216932191929,-0.81316444454349,0.609646476960393,-1.3338  
294819611,0.182259746530611,0.310312656117172,-0.95154464017911  
"Igkv10-94",15.8622880642702,-2.02722153131638,0.961264589809754,-2.10  
891106653329,0.0349522587987926,0.0883114088452582,-4.91983550099453  
"Olfr787",0.155094079781693,0.392194808605979,4.78471990596623,0.08196  
81854557333,0.934672012625022,NA,NA  
"Ighv2-5",2.65127179168804,-4.35917578305557,2.68205451526706,-1.62531  
214717741,0.104096064457853,0.203414017318022,-6.94203923332758  
"Ighv1-5",2.2749605800131,-3.21111794695453,2.40554702702527,-1.334880  
55352027,0.181915443393487,0.31000051598742,-3.76080134624895  
"Trav4d-4",1.59684764532939,-3.65830910745953,2.22863914572398,-1.6414  
990800456,0.100693857889926,0.19837615854681,-5.91764518017532  
"CR974586.4",0.720508313991748,-1.06745510990139,2.72359821384927,-0.3



91928260370222,0.695111221334331,NA,NA  
"Gm7903",0.121319358435508,1.37586479796061,4.78471990596623,0.2875538  
85075904,0.773688248834603,NA,NA  
"Igv14-100",16.3798045937805,0.948079356493841,2.74551841846318,0.345  
318884083296,0.729854651400585,0.822774398300682,0.184944909027329  
"Olfr628",0.368380894340848,-0.185678449232222,4.77865837782576,-0.038  
8557696641004,0.969005380611811,NA,NA  
"Gm21894",0.081018275684709,0,4.78471990596022,0,1,NA,NA  
"Gm10721",0.466217963318601,2.04808445689957,3.10514779181603,0.659577  
126183021,0.509525237010179,NA,NA  
"Gm3376",8.44255283523559,-3.37660619321916,2.18618826092181,-1.544517  
57589962,0.122462996732693,0.230081278694744,-4.96132394920984  
"Gm2663",1.06609132461147,-1.32063239571096,3.27358027006735,-0.403421  
418373772,0.686638232858791,NA,NA  
"Gm4617",17.5931090259072,0.774868195510532,0.478900569950365,1.618014  
76993615,0.105659414651729,0.20548047744658,1.22615472562514  
"Sm1r1",373.974870339148,2.10363600252924,0.842496880482679,2.49690657  
765289,0.0125281957658085,0.040225116528057,6.75953743718332  
"Prickle4",78.4709780592489,0.513546704889738,0.353729926291206,1.4518  
045172886,0.146555967519358,0.263294221616431,0.685319428895309  
"Trav10",0.923173428043284,-2.2326163454362,1.77501186259724,-1.257803  
61950335,0.2084627863855,NA,NA  
"Gm7258",0.356894181073751,1.3027183037915,3.80872888815179,0.34203492  
6099363,0.732324608398824,NA,NA  
"Gm2956",2.69738995975938,-4.82401846447988,1.84307531799952,-2.617374  
5681299,0.0088609047741246,0.030802268013172,-16.7883896500182  
"Oog1",0.0778527997966675,0,4.78471990596551,0,1,NA,NA  
"Ighv1-71",0.157502682527355,-1.19648096621745,4.77621924155054,-0.250  
507965758505,0.802194545266423,NA,NA  
"Igv1-132",0.113058343341289,2.23400583696369,4.75316341366045,0.4700  
04004184502,0.638352156775581,NA,NA  
"Gm13272",0.579888468167311,-0.436990491058478,2.35453623479544,-0.185  
595143791212,0.852762262096135,NA,NA  
"Igv8-19",15.5963678395675,-3.21822379442486,1.31312036456255,-2.4508  
2163164605,0.0142530562657592,0.0445719472445507,-10.0107697879998  
"Trav6d-3",0.195677951388638,-0.539938122500926,4.78471990595449,-0.11  
2846338576472,0.910152380076807,NA,NA  
"Tpbgl",127.543414168761,-1.14233287210973,0.427669361511226,-2.671065  
48870638,0.00756108935602217,0.0273061900840378,-4.11313155678799  
"Gm5559",18.8188150817197,0.283385373071795,0.75107205205716,0.3773078  
39235414,0.705944847116495,0.804612885314632,0.0616062812204459  
"Gm3383",63.4955735421588,-0.268778741940882,0.411167254204717,-0.6536  
96857403578,0.513307128316118,0.647210449295633,-0.116941267796399  
"Vmn2r26",93.1496883505465,0.238493559058806,0.445709932731965,0.53508  
6928839497,0.592589748094797,0.715526065664624,0.0798326782570096  
"Igv9-124",8.9147254798902,-5.12785983116449,1.96737947312872,-2.6064  
4166578076,0.00914884062716734,0.0315679537233973,-17.7198980468045  
"Ighv2-9",1.58430787379628,1.10588530376813,1.84600403713178,0.5990698  
18658896,0.549126327049933,0.678852721583794,0.428365866587868  
"Gm904",0.182732806477027,0,4.78471990596015,0,1,NA,NA

"Magea1",0.100532412451372,0,4.78471990596383,0,1,NA,NA  
"Gm6223",0.444247990505585,-1.45218108197052,4.69471586555083,-0.30932  
2464566263,0.757076244085497,NA,NA  
"Ighv1-31",2.32277781045528,-4.87308438451239,2.19698081469168,-2.2180  
823573538,0.0265492175209727,0.071790065442131,-12.8357489882088  
"Trav15d-1-  
dv6d-1",0.151282409519627,-1.12784750445451,4.77583135733466,-0.236157  
313788389,0.813310601408361,NA,NA  
"Trav12-2",1.5086506997534,-1.59505161787536,1.62103022466354,-0.98397  
4014553881,0.325128289689158,0.470009026802552,-1.20426936037714  
"Vmn2r39",0.0886915477092956,-0.544048378937457,4.78471990596623,-0.11  
3705376621746,0.90947135024012,NA,NA  
"Gm3409",0.0992620173439252,0,4.78471990596623,0,1,NA,NA  
"Ighv2-6",3.04468207733401,-5.43053062492721,4.67812387826999,-1.16083  
514807125,0.245708946287493,0.384774960622724,-5.18668151773994  
"Ighv1-63",0.92169770534811,-0.640187307743081,2.38236533410849,-0.268  
719200442298,0.788145775262105,NA,NA  
"Mup15",21.0532447102129,2.13770871994538,1.28457678242194,1.664134638  
89247,0.0960855261996106,0.19134670512103,3.53506111569282  
"Trav9-4",0.609949446046473,-2.71221645582403,2.17450163105363,-1.2472  
818677583,0.21229416357555,NA,NA  
"Mfsd4b4",580.204783549243,-0.082359399757296,0.211562991568317,-0.389  
290202160432,0.697061483360185,0.797939576267063,-0.018590361652729  
"Mup17",23.2657385303085,2.79927861948167,1.22826840647368,2.279044714  
27243,0.02266440741777,0.0633940843275661,7.72148739627427  
"Zfp960",625.012318736135,0.0439577861916586,0.110785541305613,0.39678  
2699922877,0.691527709231832,0.793748588603183,0.0101537433996798  
"Rps19-  
ps4",0.355181400705539,-0.242171298388846,4.77953980567472,-0.05066832  
96373674,0.959589813508104,NA,NA  
"Gm9285",0.123483961654264,0,4.78471990596333,0,1,NA,NA  
"Olfr1286",0.506160369488023,0.378785699912053,2.37348292524022,0.1595  
90657208421,0.873203539117186,NA,NA  
"Gm15454",3.45215565348376,0.129097616196275,0.867149970000201,0.14887  
5766202523,0.88165166385674,0.926209274885707,0.00989598694490345  
"Olfr699",5.17660943297221,-1.12205321159197,0.903136237621005,-1.2423  
9640139745,0.214090342712945,0.348762093927396,-1.18193188252209  
"Igkv3-4",87.7995252217876,-9.52874382957923,2.49656216135537,-3.81674  
607469262,NA,NA,NA  
"Zfp781",144.478040558918,-0.355331949202331,0.291905826403003,-1.2172  
8282570065,0.223496626381554,0.359578943905235,-0.363441168762324  
"Mrgpra2b",0.689677840723612,1.61309078383703,2.40197795772439,0.67156  
7688058742,0.501858954444019,NA,NA  
"Hmgb1-  
ps9",2.76804252019998,1.07750840762655,1.02646331268012,1.049729098269  
62,0.293842681405397,0.43792284659806,0.889712197065623  
"Gm5558",0.287521934680722,2.19019929595434,4.7549096616142,0.46061848  
737854,0.645072345443578,NA,NA  
"Psmb9",1875.64958879475,-0.895978378027058,0.294125006955233,-3.04625  
025699848,0.00231714885735675,0.0111868952105717,-4.02564183379503

"Gm8897",0.646126873442515,0.0280925854677859,3.66360834601702,0.00766  
801000940166,0.993881873157464,NA,NA  
"Vmn1r79",2.47211531071254,-0.767395032277721,1.58094997035664,-0.4854  
01212351208,0.627391772554167,0.743776055284317,-0.22716066334722  
"Lbhd1",290.475243815852,-0.199513517697983,0.321354874093841,-0.62085  
1070831188,0.534697617075094,0.666636878171889,-0.0809046850326977  
"Gm12622",0.250259169302537,-0.807904653643436,4.76103346749679,-0.169  
691025941939,0.865253131977052,NA,NA  
"Trav7d-3",0.2123632417033,-1.72359251910298,4.75707293109758,-0.36232  
2071590629,0.717111366340597,NA,NA  
"Fam181a",1.42607092808152,4.92852741394263,1.96238516023883,2.5114985  
1405461,0.0120219792023507,0.0390283966845544,15.985510001513  
"Ftl1-  
ps2",1.24638601037007,0.31624408759064,1.34064940234733,0.235888732010  
719,0.813519012108074,NA,NA  
"Olfr251",0.646752289285886,0.124533771185633,2.05193501228916,0.06069  
08944190696,0.951605383515171,NA,NA  
"Gm21985",1.93465815100735,0.938410435138225,3.22987632185698,0.290540  
671414532,0.771402640660152,0.852226186911947,0.150054934519683  
"Amy2a4",8.4120431730264,-0.0245931539189653,1.13423524453762,-0.02168  
25866039728,0.982701154385239,0.988843275184532,-0.000275921116732142  
"Olfr675",1.74089389519184,0.713995477655698,1.5170683142933,0.4706416  
12463115,0.637896686265126,0.752204994786661,0.2033076366883  
"Gm5796",9.00478615427643,-1.2617509536388,0.718125721335532,-1.757005  
65534997,0.0789168452537818,0.164541727190586,-2.27694451638318  
"Tmem181b-  
ps",584.471456491321,-0.430738067305453,0.184540524030057,-2.334111001  
19829,0.0195899104003415,0.0565453846019035,-1.23738628385474  
"Gm3002",4.02194334160657,-5.13873638483039,1.78059952931388,-2.885958  
52140347,0.00390223581933296,0.0164902024285553,-21.0944556483718  
"Olfr905",53.7193739893892,0.792318718271386,0.380058965235313,2.08472  
576822605,0.0370942002313696,0.0925243336460592,1.88594325314693  
"Zfp433",217.054973796215,0.256572709780015,0.208116577430395,1.232831  
67995508,0.217638569198337,0.353037154993813,0.267138880096341  
"Gm6309",8.57083370934797,1.36279237774344,1.00910325169775,1.35049845  
043173,0.176856150386228,0.303285314553635,1.62592208032695  
"Ighv9-1",1.1611508444888,0.148493824619685,2.57922330597211,0.0575730  
780176546,0.954088694721046,NA,NA  
"Olfr312",1.56103580001186,1.80961872179794,1.49104984040472,1.2136540  
7966963,0.224879846599571,0.360973191529306,1.84391386499987  
"AC132444.6",262.029256045904,0.703077301297489,0.382360885233383,1.83  
877935335449,0.0659476462327512,0.143306231126992,1.36591851654215  
"Gm10481",2.16924766435469,-0.637917287219555,1.51547016270874,-0.4209  
36883428536,0.673801171344846,0.779596931097362,-0.158827528455206  
"Olfr344",312.689837586996,0.64921455812731,0.155483609078089,4.175453  
36114017,2.97393181297361e-05,0.000387605096854007,5.09992023625539  
"Trav12-1",0.369344452832703,-1.94074562632018,3.08360424154441,-0.629  
375715655443,0.529103112528748,NA,NA  
"Ccl27b",0.200216280916251,0,4.78471990595963,0,1,NA,NA  
"Igkv4-55",87.9814792882979,-6.90219799094274,1.94720246396588,-3.5446

7402269253,0.000393098915291928,0.00285674344031383,-40.4335794163155  
"Gm15127",0.197329541459206,0,4.78471990594883,0,1,NA,NA  
"Gm3460",0.291542473888407,-0.144098079605986,4.78471990595725,-0.0301  
163040759347,0.975974297856612,NA,NA  
"Igkv6-14",16.3828525648061,-4.39624644157464,2.39440828681041,-1.8360  
4712103251,0.0663506878957449,0.144001081098757,-8.51963752567344  
"Gm8890",0.50238746882029,-0.837347907119188,4.78288998108659,-0.17507  
1538427684,0.861023421900276,NA,NA  
"Tmem151b",316.964119650625,-0.273351089393167,0.419923619390459,-0.65  
0954308762034,0.515075982146471,0.648853307913936,-0.118237635315402  
"Gm21748",33.6160867322008,-0.504402931669802,0.548174277132858,-0.920  
150676000349,0.357494025536639,0.502626082341605,-0.346983195461572  
"Cyp2d12",2377.36285795955,2.37040347243889,1.18262084717834,2.0043646  
9397148,0.045031008433771,0.107192601934033,5.2934144711694  
"Ifnz",3.43412727861741,0.494263707102909,1.05659967955397,0.467787106  
760771,0.639936841741884,0.753653572135979,0.139788882452352  
"Gm10778",286.257781868915,-0.208956910224152,0.167697747805993,-1.246  
03289524133,0.212752318722615,0.347162499828735,-0.221068535313121  
"Gm7732",0.305736639256479,-0.0634041414638366,4.78471990595995,-0.013  
2513799574473,0.989427237951391,NA,NA  
"Gm13301",145.854369805088,-0.843699398391774,0.515013802905101,-1.638  
207352177,0.101378446452126,0.199402496612887,-1.3604061373437  
"Gm6676",0.722911466371021,-1.21274748216323,2.22002734853787,-0.54627  
5919961955,0.584876286095279,NA,NA  
"Gm10312",0.173133086854191,0,4.78471990595326,0,1,NA,NA  
"Gm21083",2.79680924058928,2.95843114434921,1.08678263134969,2.7221921  
4680962,0.00648504239929199,0.0242650847632691,11.001567606712  
"Tdp0z8",12.8853083225957,-0.804713692981902,0.756859586259162,-1.0632  
2719245622,0.28767893363179,0.431697503326049,-0.675983772101993  
"Shisa8",3.88320168965261,-1.10744723647391,1.13350548987627,-0.977010  
915575531,0.328563748420633,0.473281321417369,-0.828442857406684  
"Gm20594",15680.3295124224,0.384634328667729,0.530751805149639,0.72469  
7165296096,0.468637834552102,0.606820327938431,0.19213351368897  
"Trav9-1",1.19259729512448,-1.95395539164911,2.36213182965579,-0.82719  
997551273,0.408123725535857,NA,NA  
"Gm3029",0.104867978456719,-0.544048378937457,4.78471990596623,-0.1137  
05376621746,0.90947135024012,NA,NA  
"Gm3591",10.4337387118819,-2.35030825642779,0.910542687100958,-2.58121  
699259466,0.00984526770568204,0.0333616666189413,-7.99186537777345  
"Trav7-3",0.869233937810788,-3.00519457009132,2.6076178228114,-1.15246  
741443547,0.2491290525288,NA,NA  
"Zfp955b",570.63492682707,0.120743620243506,0.156052273940487,0.773738  
29419207,0.439085569425265,0.581096208012884,0.0655443394834253  
"Galntl6",1.44069613204377,2.28932105903092,2.21903328382313,1.0316749  
5310692,0.302224414694231,0.446726680138588,1.84475396844881  
"Zfp850",111.224129373407,-0.305758662457039,0.155599064318644,-1.9650  
4178091258,0.0494094019958799,0.115264958137792,-0.660598260948553  
"Rps19-ps8",0.0810182756847091,0,4.78471990596022,0,1,NA,NA  
"A730071L15Rik",11.7423887414619,1.25053385282874,0.445787849097276,2.  
80522193541408,0.00502819450518331,0.0199673597682412,4.8941597542604

"Rps19-ps6", 22.7609082430663, 0.528868013096147, 0.473010635437451, 1.11808905228323, 0.263528961647583, 0.405483561727003, 0.477395904384989  
"Gm6345", 45.7767845378342, 0.977000952295873, 0.352677503983883, 2.77023893290489, 0.00560151849489294, 0.021618845529181, 3.74600715083128  
"Gm18336", 6.55856616651419, -1.2500484500967, 0.901365782436394, -1.38683814546168, 0.165491122538828, 0.288230987696478, -1.55505162120516  
"Gm26620", 21.4157116707352, 1.11111757022191, 0.415064504498138, 2.67697564638871, 0.00742900346619478, 0.0269625625448071, 4.01480772493616  
"Gm16531", 0.265677149170868, -2.04212530827931, 4.74822941714823, -0.43008143222907, 0.667136406209626, NA, NA  
"Gm9918", 18.5422042861759, -0.842415795722003, 0.453174692932268, -1.85892065214664, 0.0630383863043664, 0.138570739138956, -1.66492895540009  
"Gm1972", 0.134009416405579, 1.37396150402667, 4.78471990596623, 0.287156099213546, 0.773992799061336, NA, NA  
"Cdiptos", 58.613310020543, -0.318356950104807, 0.365505196127235, -0.871005264707604, 0.383751278496355, 0.528420950454034, -0.203067819457379  
"Gm26566", 8.88554033513254, 0.0480840237392383, 0.749849616745182, 0.0641248893984279, 0.94887078375314, 0.968428323871889, 0.00154257424851589  
"Foxl1", 101.845126143758, -1.09318116749837, 0.235170500842857, -4.64846213100872, 3.34419001341209e-06, 7.19702173085088e-05, -10.4281373866475  
"Gm7672", 0.117558940016049, 0, 4.78471990596079, 0, 1, NA, NA  
"Rpl31-ps23", 0.157204231550809, 0, 4.78471990596093, 0, 1, NA, NA  
"Gm26729", 0.0778527997966676, 0, 4.78471990596551, 0, 1, NA, NA  
"Gm3839", 12.133621163371, 0.799800984951541, 0.567565054827369, 1.40917940269386, 0.158782126628776, 0.279766626857931, 1.0187860938143  
"Gm26595", 0.961683697558036, -0.602581612070751, 1.95834818247961, -0.307698915576789, 0.758311444965052, NA, NA  
"Gm19426", 157.250714246884, -0.246581960365499, 0.216726111819739, -1.13775842834569, 0.255221368240648, 0.395982035327139, -0.228430182974459  
"1810049J17Rik", 1.63895373057061, 1.23668155196072, 1.34147885691106, 0.921879271961351, 0.356591552230522, 0.501682811558605, 0.853047115501083  
"Gm27029", 126.206456789534, 0.055150218981314, 0.263193045292447, 0.209542843049039, 0.834024493724108, 0.89375155694601, 0.0061948830756386  
"Gm5421", 9.8411278298343, -1.03805376472305, 0.640411320911455, -1.62091726180865, 0.10503538427861, 0.204634284838564, -1.6469043418528  
"Gm9903", 11.1393121262756, -0.424022736719383, 0.484201541811652, -0.875715379040081, 0.381184782650827, 0.526137295297032, -0.272304468398456  
"Hmgb1-ps8", 85.4165534964589, -0.887249147921499, 0.493314419007956, -1.79854695856192, 0.0720903741514466, 0.153418261864757, -1.66322602879344  
"Rpl31-ps15", 0.623317678530175, 2.24962454548287, 2.50471746533237, 0.898155012140003, 0.369102913872782, NA, NA  
"E030030I06Rik", 289.193301414059, -0.0123990728228748, 0.199909488980649, -0.0620234331351575, 0.950544170980782, 0.969387010083335, -0.000385503982443921  
"Tnfsf12", 1790.58247916242, -0.219285101443403, 0.188982415019718, -1.16034659320299, 0.245907721549793, 0.385055312783317, -0.209278746288563  
"Zfp87", 519.319970401005, 0.0265974618597141, 0.298119269530604, 0.089217

5198926002,0.928909042040053,0.9561750871976,0.001191944961924  
"C920009B18Rik",78.9744307816534,-0.123197105083358,0.478410171647882,  
-0.257513557161642,0.796782351011779,0.870004047713931,-0.017156110364  
7009  
"Gm8177",0.947703357324239,-1.69228193568002,1.81325458228571,-0.93328  
4246025069,0.350673226976448,NA,NA  
"Gm26875",0.100829596755246,-0.0669917292970234,4.78471990596623,-0.01  
40011809705912,0.988829038851383,NA,NA  
"Gm3200",2.71471207482997,0.709500276398774,1.11640616668671,0.6355216  
38602592,0.52508825860147,0.657853297321304,0.297119789774657  
"Thoc2l",5052.7301593988,0.798915735052722,0.232131806618034,3.4416469  
9655878,0.000578184230815106,0.00385416619912237,4.44085347312495  
"1810014B01Rik",335.804639041342,0.600590147902438,0.198115942044112,3  
.0315084273668,0.00243335127717084,0.0115829834967607,2.67756192680646  
"Vmn1r181",2.15911972078923,-3.55936491956231,1.83921732526436,-1.9352  
6065172897,0.0529583182922856,0.121451574930956,-7.50399427319368  
"Gm8941",9.6006640807203,-2.99939952490429,0.899027258904574,-3.336272  
05982489,0.000849100260097022,0.00519967238422479,-15.7743209808404  
"Gm26587",0.178978318049618,0.873903026788527,4.78471990596623,0.18264  
4552651625,0.855076924331461,NA,NA  
"Ptges3l",236.517761171463,-0.181224112711149,0.2063794876348,-0.87811  
1069990808,0.379883446068076,0.524647076883081,-0.116894894632775  
"Kansl2-ps",0.0899330624870536,0,4.78471990596623,0,1,NA,NA  
"Gm4349",14.5134750296748,-1.81731855421942,0.670202103029741,-2.71159  
780908472,0.00669597829829187,0.0249061779588124,-6.71070208746589  
"C920006011Rik",224.012102339387,-0.0119018470367238,0.259437521717574  
, -0.0458755809796867,0.963409417235656,0.978046740493088,-0.0002641950  
36457074  
"Gm26528",0.493001526307823,1.09046863348186,2.58966529473382,0.421084  
777132926,0.673693177159191,NA,NA  
"Gm26509",3.60252666491593,-0.361079580181763,0.815585532966384,-0.442  
724356412347,0.657965122944783,0.767179634762147,-0.095698474013532  
"Gm2383",0.257270605939998,0.411727608979836,3.99525106959257,0.103054  
251612233,0.917919913556385,NA,NA  
"Carlr",0.420906585003322,1.3717206604933,4.78471990595262,0.286687765  
941484,0.774351405925856,NA,NA  
"Gm26712",8.64939659863967,0.183043858188575,0.933080069281478,0.19617  
1651517033,0.844475815749084,0.900398614068773,0.0192045422824855  
"Gm7389",1.6301763634248,1.29236323328647,1.44572337026835,0.893921520  
440379,0.371363882519686,0.516539661960966,0.853739292012715  
"4930471M09Rik",1.31884495907528,-1.78516175223237,1.49538111225965,-1  
.19378380373872,0.232562548771481,NA,NA  
"Gm5523",0.379709834341309,-2.01554441814914,3.05443452144407,-0.65987  
4816107118,0.509334166621287,NA,NA  
"Gm7741",4.85682967134571,1.20556263804767,0.676741780893679,1.7814219  
1317883,0.0748435510283816,0.157949946742221,2.22483822776932  
"Gpr137b-  
ps",1743.42927174161,1.1319262803722,0.292703535782845,3.8671424905914  
8,0.000110118091897519,0.00106876228693663,7.74379523997135  
"Gm2539",0.219251263977333,-1.48759955336407,4.76545465850171,-0.31216

3195322853,0.754916501333868,NA,NA  
"Gm2115",67.5081073207427,0.794438043184015,0.352077524154392,2.256429  
30514258,0.0240437580704247,0.066309079894928,2.15565077980363  
"Rpl31-  
ps16",0.379009430820157,-0.0756245673180902,3.06697985772087,-0.024657  
6667687307,0.980328021828865,NA,NA  
"Gm3532",0.28737511608559,0.398452958903284,4.78471990596604,0.0832761  
304180951,0.933631979524039,NA,NA  
"Gm26602",0.262803175675674,0,4.7847199059504,0,1,NA,NA  
"Gm3650",207.315061901695,0.189151085770236,0.218101966277792,0.867259  
883064595,0.385799632013368,0.530107436237116,0.120049575654748  
"Gm9625",9.38548874938211,0.725747743513582,0.644243417310952,1.126511  
69420221,0.259948993522315,0.40133703980506,0.662574092373541  
"Gm27021",4.07342482247924,-1.77501824668046,1.40854447230159,-1.26017  
905830126,0.207604775620857,0.340727647683933,-1.9111121048208  
"Gm3809",0.176295679632062,0,4.78471990596548,0,1,NA,NA  
"Gm6967",0.914253080548067,-0.571180252368263,2.19308155657176,-0.2604  
464255589,0.794519435764761,NA,NA  
"Gm21430",0.168686641657972,0,4.78471990595019,0,1,NA,NA  
"Gm17800",0.0973019123820758,-0.0602094427769676,4.78471990596623,-0.0  
125836922453685,0.98995993121322,NA,NA  
"Gm4217",0.696790370665599,-2.47676274450819,2.33036270258621,-1.06282  
285661348,0.287862292153886,NA,NA  
"Gm5652",0.173485825973601,-0.54395274066553,4.78471990596623,-0.11368  
5388352045,0.90948719582514,NA,NA  
"Gm4691",1.56049279143841,1.00203662250327,1.20278895145725,0.83309430  
2445371,0.404791546641416,0.54859306056281,0.601621134705894  
"Gm4335",1.50538056435936,1.35916664694464,1.49745541326332,0.90765082  
8803429,0.364062730516329,0.508998646178645,0.917858722607814  
"Gm7656",3.65178068408146,-0.252159306765495,1.11358307781891,-0.22643  
9600051556,0.820859531274089,0.885140976705132,-0.030765541194752  
"Ptprv",94.9614931244352,-0.836751374234945,0.485425062172812,-1.72374  
984202414,0.0847530129710343,0.173893954215429,-1.46373723192388  
"Gm9658",0.147584720452783,-1.19613598147574,4.77623172629649,-0.25043  
5081466039,0.802250902680516,NA,NA  
"Gm27027",1.13037986177321,0.371687357949421,1.46534723564854,0.253651  
386447608,0.799764893894657,NA,NA  
"Gm8565",0.899942345152388,1.58882400427161,1.87554025107424,0.8471287  
15772214,0.396923380887699,NA,NA  
"Gm8614",0.114276479518733,1.34572550252596,4.78471990596623,0.2812548  
13024254,0.778514965900669,NA,NA  
"Gm8907",0.0848057719560109,0,4.78471990596508,0,1,NA,NA  
"Gm9211",0.901168785028168,-2.56806903979732,3.09465793086395,-0.82983  
9386830189,0.406629598622537,NA,NA  
"Gm2546",2.5852603797432,2.20347216912039,1.10913049219479,1.986666298  
17387,0.0469593889148469,0.110916313151022,4.84538968273028  
"Gm9522",64.2043056697268,-0.174756621987305,1.06151395421117,-0.16462  
9604061277,0.869235528470898,0.918012909442399,-0.0149493500439005  
"Zfp82",206.84500562825,-0.235056348538712,0.255394329566289,-0.920366  
35636306,0.357381343694849,0.502540129767933,-0.161737521060908

"Gm7765",0.840133633561575,1.59595241973303,2.38810305433962,0.6682929  
43569959,0.503946616767336,NA,NA  
"Gm26925",0.11227020587943,1.36039042746255,4.78471990596623,0.2843197  
62535365,0.776165342503688,NA,NA  
"Gm5345",16.168844556128,-1.8015828529008,0.651398729719868,-2.7657144  
0916927,0.00567982529943337,0.0218561740059901,-6.88794097838465  
"Gm5300",3.48442317633717,-1.10770345372625,1.17704078375268,-0.941091  
820280545,0.346657806957076,0.491394687026469,-0.787031756608518  
"Gm8100",0.166281458705858,0,4.78471990596584,0,1,NA,NA  
"Gm6283",1.27982884019539,2.38208302904867,1.38360598659891,1.72164839  
710195,0.085133230421241,NA,NA  
"Gm27034",0.10500178835157,-0.544048378937456,4.78471990596623,-0.1137  
05376621746,0.90947135024012,NA,NA  
"Gm26931",0.0789318165836824,0,4.78471990596069,0,1,NA,NA  
"Gm5177",2.78772378020205,0.468941377779966,1.52440257812408,0.3076230  
54768802,0.758369175208928,0.843266733859348,0.0799413561494864  
"Gm7909",19.7812189863877,0.138819610255471,0.480298604985608,0.289027  
71903664,0.772560165630166,0.852772764348787,0.0221087113710842  
"Gm6981",21.4691994688893,1.50722540355205,0.379254540490884,3.9741789  
2901477,7.0622458333846e-05,0.00075576108265276,10.8336125391027  
"Gm26992",1.54907292998719,-1.62148933454986,1.68081905803555,-0.96470  
1897445743,0.334694144607769,0.479414717179974,-1.19210154118879  
"Gm8957",0.182541266826834,2.04939230072814,4.76340999588842,0.4302363  
85802836,0.667023696468549,NA,NA  
"2700099C18Rik",112.070759462725,-0.366774988863408,0.449441126315829,  
-0.816069040832881,0.414460649538766,0.557782561064803,-0.214118128609  
546  
"Gm16470",0.451448854787991,-0.0696722135646695,3.11411900545759,-0.02  
23730093302687,0.982150410395715,NA,NA  
"Gm2076",0.493294723288028,-1.62600116409981,2.65865209483698,-0.61158  
8544156438,0.540810019398935,NA,NA  
"Gm8707",1.68619131513012,-4.20773004038514,1.60699825763354,-2.618378  
71970155,0.00883486908934513,0.0307362774360006,-14.6526273252898  
"Gm27006",0.0778527997966675,0,4.78471990596551,0,1,NA,NA  
"Gm6085",18.3971526518009,0.154190801682528,0.473964181770526,0.325321  
633180248,0.744937659671847,0.83418300529989,0.0279551731777571  
"Gm8825",0.104490038098981,0,4.78471990596623,0,1,NA,NA  
"Gm26956",0.121595918431446,-0.54711879872199,4.78471990596623,-0.1143  
47090211021,0.908962654681478,NA,NA  
"Gm4654",6.65454502698615,1.01678981491984,1.17030424827793,0.86882519  
3462319,0.384942750956725,0.529533918311996,0.646432318885942  
"Bin2",438.794366169051,-1.35095995283791,0.452346526330015,-2.9865598  
0360575,0.00282135649227109,0.0129072756654861,-5.87662732446765  
"Gm2445",0.868395240279358,1.22493910385629,1.60014985533427,0.7655152  
42071127,0.443964793772754,NA,NA  
"Gm27038",0.333312475098777,1.37001904315015,4.78471990595432,0.286332  
130214192,0.77462375146822,NA,NA  
"Gm4518",1.69509771203659,-2.90271329763617,1.85377278073648,-1.565840  
93142362,0.117385861145797,0.222709888160041,-4.35954244474277  
"Gm27036",0.0886915477092957,-0.544048378937457,4.78471990596623,-0.11



3705376621746,0.90947135024012,NA,NA  
"Rassf10",276.726271547883,0.153395571691518,0.329625663822042,0.46536  
2951151562,0.641671560998132,0.755194790628453,0.0430703414594681  
"Rnf113a2",722.122401553998,-0.13984534462672,0.134802780988721,-1.037  
40697039789,0.299546231185893,0.443912191009953,-0.113572390537632  
"Gm8513",0.147665687843142,1.61474496145223,4.75809713418952,0.3393678  
01016378,0.734332671889423,NA,NA  
"Gm9081",0.162978511327616,-0.546883851312605,4.78471990596623,-0.1142  
97986519687,0.909001578565127,NA,NA  
"Gm26938",0.0789318165836824,0,4.78471990596069,0,1,NA,NA  
"Gapdh-  
ps14",0.181639957191548,0.41449049261922,4.78471990596623,0.0866279533  
107836,0.930967245890247,NA,NA  
"Gm5787",0.192210884101979,-1.1001786619925,4.77954375056888,-0.230184  
871068824,0.81794811738123,NA,NA  
"Gm27023",0.118485408822311,0,4.78471990596574,0,1,NA,NA  
"Gm4804",6.93840915125402,-1.13538022072391,0.868782156795095,-1.30686  
411069064,0.191258866867702,0.321032319802051,-1.29003430737348  
"Ccdc166",247.548843905496,-0.106731209102992,0.266395996293571,-0.400  
648698133485,0.688678786490823,0.791279752988495,-0.0249861713532682  
"Gm4823",0.226492932080685,1.58217427196421,4.72930391993539,0.3345469  
64785851,0.737966857536529,NA,NA  
"Gm5430",0.383304879124096,2.77566077720147,2.98430926247253,0.9300848  
31389696,0.352327163830023,NA,NA  
"Rps12-  
ps24",0.188965583896187,-0.889158918577377,4.78240487287449,-0.1859229  
70181933,0.852505168655493,NA,NA  
"Sowahc",1890.96346691478,-1.77503668650411,0.42469179765295,-4.179587  
87128411,2.92037861918599e-05,0.000382414656258486,-13.9677726508983  
"Gm3534",2.0060182945364,0.889622900155217,1.21348032427087,0.73311687  
2488026,0.463487150177245,0.60251166438802,0.450725888926028  
"Gm7286",0.290086819811523,-0.547781278038535,3.94780444349245,-0.1387  
55930259285,0.889643019572698,NA,NA  
"Gm9169",1.77041851390339,2.02344763247106,1.52065790059532,1.33063960  
78164,0.183307623305231,0.311471201673673,2.36024724430296  
"Gm9358",1.7030379833094,-4.02509568094383,1.83124339862136,-2.1980123  
9091106,0.0279482229503186,0.0744866542815153,-10.4537181062454  
"Gm26983",0.0778527997966675,0,4.78471990596551,0,1,NA,NA  
"Gm9149",0.222265746865732,3.19052280584978,4.69750997731396,0.6791944  
71381224,0.497014649864957,NA,NA  
"Arl14",8.5838505774803,-1.38748465698271,0.865470494556225,-1.6031565  
0933213,0.108900104549543,0.21018949104207,-2.16412338964676  
"Gm8349",0.29378497222084,0.884866685776829,4.78471990596471,0.1849359  
42577065,0.853279279113501,NA,NA  
"Gm8318",0.337691986495753,-0.195781925617875,3.14987994993628,-0.0621  
553610707721,0.950439110422315,NA,NA  
"Gm3671",0.425963090800234,1.29513439477895,3.69602911321212,0.3504123  
8992119,0.72602922931767,NA,NA  
"Gm7497",17.1766229356543,-0.595282467482636,0.593833527840103,-1.0024  
3997614585,0.316131142838584,0.461371633463077,-0.460481594692402

"Gm8756",0.424576703951363,1.34152264174025,2.62081145994087,0.5118730  
06603274,0.608739891086527,NA,NA  
"Gm4575",0.452844038011281,-1.01135817503554,2.67882236161517,-0.37753  
8350256922,0.705773569928564,NA,NA  
"Rp124",15430.5050091375,0.153305087419944,0.169660356546909,0.9035999  
3660368,0.366207574919817,0.511190957602132,0.102869563230544  
"Gm18014",0.220934797106265,0,4.78471990595636,0,1,NA,NA  
"Obox4-  
ps1",0.556765967635899,-0.9989915519171,3.16913579453378,-0.3152252275  
33698,0.752590652452396,NA,NA  
"Gm28040",148.501196565107,1.98058051894832,0.537693357420049,3.683475  
89126171,0.000230075053140577,0.00188963916854885,12.4209520295727  
"2310009A05Rik",614.600178273802,0.355839266661861,0.268950256654558,1  
.32306721357364,0.185813026745488,0.314385837858689,0.411753808080656  
"Rpap3-  
ps2",1.27414363462528,1.6495079583812,2.14576651812569,0.7687266738703  
84,0.442055586587729,NA,NA  
"Gm2274",44.4562523509849,-0.820297307735283,1.15642979674596,-0.70933  
6018531772,0.47811598178595,0.6155368380893,-0.398057868965569  
"Gm28043",452.929622517038,-0.323376056210717,0.247953076421832,-1.304  
18247225363,0.192171374609807,0.322097263142958,-0.366353290158045  
"Pet117",4.85125886466271,0.39484361728667,4.59004026592565,0.08602181  
99430205,0.931449071710421,0.957172657331601,0.0172828928997597  
"Mrip-  
ps",0.460700375201762,-1.3825889485165,4.76950352588861,-0.28988110418  
8702,0.771907197930592,NA,NA  
"Gm7870",0.222482282452753,-0.534854688947374,4.7847199059612,-0.11178  
3907827292,0.910994747239077,NA,NA  
"Gm2260",33.6056619924347,-1.32057066041622,4.56850404751065,-0.289059  
754940087,0.77253565044415,0.852772764348787,-0.210316939534223  
"Gm12117",4.41986163098153,0.648028440514804,0.850560110144281,0.76188  
4354540067,0.446129028544391,0.587229041960341,0.344971683285992  
"Cphx2",5.07869939499337,-4.71900677437851,4.72002516117472,-0.9997842  
41235706,0.317414933736133,0.462473250338216,-3.63914022463112  
"C1rb",1.01722161763488,1.66274616410909,1.86226075818569,0.8928643085  
02653,0.371929842665881,NA,NA  
"Pla2g4b",302.789622295543,-0.0305831511251616,0.319296265292687,-0.09  
57829904371954,0.923692926904169,0.953070047561914,-0.0014700365287084  
5  
"Gm19353",5.64682458939836,-0.647018141492175,0.822183060372048,-0.786  
951437797066,0.431310294563203,0.573531209397349,-0.359705157926462  
"Gm14496",90.9721185096762,0.683514916958643,0.415088479445843,1.64667  
281990374,0.0996253138140857,0.19678094500727,1.11116567817292  
"Zfp572",0.427531515106327,-2.01527506268336,2.59649181980163,-0.77615  
3056718402,0.437658619709944,NA,NA  
"Gm28051",1.08925037496481,-2.17663690556825,2.03922145063985,-1.06738  
623452852,0.285797461866712,NA,NA  
"Gm5269",0.977397545122446,1.32765220593691,1.51058210869891,0.8789010  
52972511,0.3794549277037,NA,NA  
"Kctd12",4051.86093319661,-0.692486366943006,0.173981599625754,-3.9802

2761276245,6.88493142797123e-05,0.000742711683730168,-4.98950459371263  
"Gm15013",0.284524313194256,2.10496185980179,4.72815311581449,0.445197  
481604649,0.656177046545312,NA,NA  
"Gm14214",0.148177164577155,2.59891947282788,4.7275994170606,0.5497334  
36265582,0.582502219767124,NA,NA  
"Gm28048",1618.5995412081,0.468528935435665,0.209766695549837,2.233571  
60776912,0.0255112738052944,0.0695683602203607,1.24883830019189  
"Mroh6",34.9098404309421,-2.46657659118818,0.880340456253446,-2.801843  
96123908,0.00508114433536627,0.0201418806196099,-9.6318681722212  
"Gm28041",10.1646365280256,-0.293374748984478,0.631007724120874,-0.464  
93051950071,0.64198121395603,0.755422432692497,-0.0822852135122016  
"Rps2-  
ps5",0.448449796094204,1.86905976416143,2.54505003196319,0.73439018513  
8988,0.462710966906647,NA,NA  
"Gm28053",6.03320583858425,-3.10347151518162,0.99224164455251,-3.12773  
761534797,0.00176157363995475,0.00907454764381448,-14.5933974565754  
"Obox4-  
ps2",0.429102583006412,0.860090610147912,3.05892935296596,0.2811737411  
69917,0.77857714405766,NA,NA  
"Prn",0.262504470878925,-2.01337166768009,4.74889217132398,-0.42396660  
0007843,0.671590171850734,NA,NA  
"Gm28044",1.50231276125113,-1.74931724106996,2.15858353335724,-0.81040  
053073566,0.417710012935787,0.560907347617129,-1.011454429107  
"Jmjd7",213.824008268154,-0.0615054585472951,0.266838600878101,-0.2304  
96855945487,0.817705706316139,0.883107669311625,-0.00764562976762247  
"Gm28038",0.629219092106837,2.84657928636073,2.97267454776228,0.957581  
881441923,0.338273639123468,NA,NA  
"Igkv19-93",26.9878981888342,-1.23583166664046,0.918908818713549,-1.34  
489041945489,0.178660624582671,0.305733268221249,-1.46451271369125  
"Kdm4dl",2.66100615815046,-1.35712370451677,1.51459308001824,-0.896031  
892936171,0.370235729919404,0.515374902689266,-0.899583937237254  
"Gm27235",0.427551992243539,-0.914566830174293,4.78338727567169,-0.191  
196484304288,0.848371657927214,NA,NA  
"Gm17828",1.30639795184103,0.0687547069224982,1.46850456788684,0.04681  
953902359,0.962657056220356,NA,NA  
"Gm18190",22.0001371083348,-0.36905206407152,0.499669060903633,-0.7385  
92986734266,0.460154184151375,0.599618143593097,-0.188756200428812  
"Zfp953",221.98110008568,-0.101430045205543,0.165235336210898,-0.61385  
2021798067,0.539313117080895,0.67020568239919,-0.0405893245890555  
"Rpl15-  
ps2",3.5592420572852,0.264346171132691,0.763706840242899,0.34613565991  
9734,0.729240765161396,0.822272521346108,0.0517281587039276  
"Tmem185b",1291.57246654914,0.335609460298709,0.134492208848162,2.4953  
8217249151,0.0125821534621283,0.0403282337141906,1.07754245770066  
"Gm18853",123.167366193071,-1.19116813809247,0.317865584997522,-3.7473  
9573679156,0.000178680069137298,0.00155196078648198,-7.7047567805465  
"Gm27150",0.763173596724052,0.700849387515098,2.97431891672439,0.23563  
3570957798,0.813717020994454,NA,NA  
"Gm28036",32.6946257298982,-2.23077142689056,0.800503107664786,-2.7867  
1176355346,0.0053245815987711,0.0208722742285563,-8.63159881958816

"Rdh16f1",185.801220825063,-0.82671006968522,0.5386516966719,-1.534776  
69297825,0.124838689719748,0.233397715232107,-1.20287253309885  
"Tcf24",374.381786172033,0.796357585907004,0.418923729180771,1.9009607  
9652572,0.0573071477742983,0.129110334867574,1.6302140029803  
"2810039B14Rik",118.632193312866,-0.16905810913729,0.198137167376879,-  
0.853237741184234,0.393527477875025,0.538040723904862,-0.1047857707765  
27  
"Gm28035",433.148397336067,0.449554849008992,0.203852962988042,2.20528  
974619497,0.0274337689148057,0.0735464906229728,1.17326512448777  
"Atf7",1848.46439305544,0.0975322838343435,0.272433880643756,0.3580035  
03836882,0.720340691424491,0.815112015941091,0.0199384986761476  
"Gm27193",1.22858937275943,1.19072022691958,1.6874291817156,0.70564159  
9553814,0.480411047444312,NA,NA  
"Gm5746",0.28234789038071,0.870398181013604,4.78471990596004,0.1819120  
44617157,0.85565175197532,NA,NA  
"Obox8",0.374753672368421,-0.541802046692805,3.80297586329141,-0.14246  
7916223871,0.886710419982167,NA,NA  
"Gm18852",49.3137570630441,-1.81136376660924,0.484560242973645,-3.7381  
6010057549,0.000185371892495818,0.00159575327147173,-11.6659241997911  
"Gm27228",1.6691458609922,0.329272591362897,2.59850645670915,0.1267160  
95129469,0.899165106459715,0.938238319905358,0.0209915524126459  
"Gm11214",0.753804692023112,-0.914699301197524,2.01912864040301,-0.453  
016852366054,0.650536606549534,NA,NA  
"Gm19427",1.78494761669258,-0.0833582206107091,1.08084312501597,-0.077  
1233296316499,0.938525433909377,0.961881421191497,-0.00323964211398907  
"Gm29486",1.36676528308536,2.13235196542659,1.61855253003269,1.3174437  
8131707,0.187689913713837,0.316599873483208,2.4524532456591  
"Gm18180",3.17429950838337,-0.971682873849849,1.0822700938896,-0.89781  
920366818,0.369281944912413,0.514267506742535,-0.646180487355727  
"Gm18303",6.27795069056966,0.918990754986881,0.733463054049403,1.25294  
75750867,0.210224786281696,0.34398815734479,0.98069919079642  
"Ms4a14",394.187938797459,-0.979807868379792,0.531227899130478,-1.8444  
2095376308,0.0651218159193802,0.141997893848812,-1.91252916248923  
"Gm8506",1.45370392928117,3.22601381399912,1.65936526947535,1.94412518  
650526,0.0518803567022476,0.119612533401966,6.85043274845997  
"1700028B04Rik",0.355212008796338,0.4.78471990595385,0,1,NA,NA  
"Gm4275",6.18782929471146,0.900565544331834,0.695314538887514,1.295191  
59166831,0.195254144702232,0.325807900162954,1.00993682932633  
"Gm17826",0.578650158833594,0.92446254437167,2.2581410314914,0.4093909  
68712484,0.682252766316882,NA,NA  
"Gm29288",0.323945449380598,-0.945577004058266,3.84700666242577,-0.245  
795520266145,0.805840525013314,NA,NA  
"Gm8451",1.5782019757302,1.05328335584005,1.00019941644591,1.053073355  
69418,0.292307373271281,0.436203881441466,0.87385182478075  
"Xndc1",1289.45474123131,0.100591152609065,0.154002225260988,0.6531798  
64372692,0.513640329742033,0.647463094731714,0.0437263185455803  
"Gm5525",0.450197235428453,-0.98458598903202,2.29119998712434,-0.42972  
5032544088,0.667395671820324,NA,NA  
"H3c8",1.4673560373534,1.26804724721955,1.54652519260088,0.81993313350  
8805,0.412254226978963,0.55573374707106,0.744934608124824

"Gm13275",0.245974534087972,-1.92424228237241,4.75125219344403,-0.4049  
9687325113,0.685479809293213,NA,NA  
"Gm8282",0.087583724926668,0,4.78471990595887,0,1,NA,NA  
"Gm13276",0.671027738887907,3.69225578765639,2.24985308169116,1.641109  
73187681,0.100774638952205,NA,NA  
"Gm28079",0.142425137392067,2.57912268336951,4.72883040948399,0.545403  
928674817,0.585475739019112,NA,NA  
"Gm28729",2.24295081270336,-1.19991347638093,1.49154316270828,-0.80447  
787659204,0.421121041195754,0.5641760382874,-0.686817216710541  
"Gm29000",0.461935409815969,-0.0510896837455523,3.05886464723633,-0.01  
67021720924172,0.986674214324333,NA,NA  
"H3c4",21.1277368330521,-1.47177028782931,0.49614307448836,-2.96642312  
169136,0.00301285674287566,0.0135794453935713,-6.32743187440528  
"Gm29126",0.089732114517527,0,4.78471990596623,0,1,NA,NA  
"Gm37545",1.61254334870928,1.62322219374811,1.26141267906336,1.2868288  
2350081,0.198153958145117,0.329209771294605,1.80349745946177  
"Gm28362",31.2099274893596,0.84377516730781,0.341602493875265,2.470049  
78721236,0.0135094248691669,0.0427231812196955,2.66043459503423  
"Gm28118",0.220365806834653,2.46694304168133,4.73253590967538,0.521272  
968396883,0.602176629009442,NA,NA  
"Gm7889",0.157400289951327,0.884575945476768,4.78471990596623,0.184875  
178246852,0.85332694026141,NA,NA  
"Gm5776",0.384250324125435,1.67819561388983,4.75528817960852,0.3529114  
43114261,0.724154831760556,NA,NA  
"Gm5975",0.363868750711131,-2.33250777938722,4.66938288568984,-0.49953  
2344313765,0.617404406645612,NA,NA  
"2310034G01Rik",54.7576818464075,0.679241727231036,0.308062588872007,2  
.20488222772563,0.0274623599388604,0.0735624528215277,1.77256315981507  
"Gm2316",0.100532412451372,0,4.78471990596383,0,1,NA,NA  
"Gm29201",6.27712682789767,1.65926719517946,0.766404315965064,2.165002  
41532446,0.0303875003041133,0.0794229867197856,4.20286979182978  
"Gm28356",0.0886915477092957,-0.544048378937457,4.78471990596623,-0.11  
3705376621746,0.90947135024012,NA,NA  
"Gm29617",1.67783951376247,-0.170846648255813,2.87286224717242,-0.0594  
691403752362,0.952578444373328,0.970345045106899,-0.0051430913240072  
"Gm29460",0.0825825126020811,0,4.78471990596623,0,1,NA,NA  
"Zfp383",471.821161185339,-0.0405722972307112,0.160735328205747,-0.252  
416800236829,0.80071891577126,0.872738410179888,-0.00552267727262018  
"Gm29284",0.379295341281404,0.436548769185919,3.79374546184566,0.11507  
0653415303,0.908389120541188,NA,NA  
"Gm29013",6.93312449850533,0.551330361568515,0.907186626981196,0.60773  
6429496489,0.543362297529293,0.673734694895145,0.217730765214207  
"Gm28802",0.411957250812994,-0.452065929993689,3.16919556776329,-0.142  
643746757712,0.886571545819462,NA,NA  
"Gm8510",0.944253412824467,-1.84445280746207,3.09467711774197,-0.59600  
8157648405,0.551169777053483,NA,NA  
"Gm17752",3.80610707201817,0.763346720189055,0.708233560351274,1.07781  
777498717,0.281115085496911,0.425062577512119,0.653057530872441  
"Gm5253",0.329177361111107,0.658160540982004,4.70814270161739,0.139791  
969507616,0.888824358396865,NA,NA

"Gm21149",2.79825013162564,3.55781036022165,1.33463145278874,2.6657624  
1162872,0.00768139575653314,0.0276077151079969,12.7713295818706  
"Rps10-  
ps2",7.26684511483904,0.464764248933788,0.692421133769421,0.6712161519  
44543,0.502082840565979,0.637127853351192,0.209508720283121  
"Gm29293",0.221060524105378,2.5844595182436,4.72811940057571,0.5466146  
89537855,0.584643474955122,NA,NA  
"Hmgb1-  
rs16",66.151751825987,1.36224762064887,0.574468623881533,2.37131770825  
797,0.0177247877109935,0.0523633198165079,4.0180160204263  
"Gm5960",0.723551556604681,-0.736439487981534,1.81673786545923,-0.4053  
63647658314,0.685210227974058,NA,NA  
"Gm8228",0.288368823874342,-0.0698334376907294,4.78471990595053,-0.014  
5950941880382,0.988355213107859,NA,NA  
"Gm18665",0.0886915477092957,-0.544048378937457,4.78471990596623,-0.11  
3705376621746,0.90947135024012,NA,NA  
"Olfr1036",0.575778014183777,1.27878401782364,2.42527965271232,0.52727  
2810124599,0.598004153034163,NA,NA  
"Gm29668",0.768886731360431,0.87034361353248,1.63576554725915,0.532071  
124123384,0.594676735902977,NA,NA  
"Gm4034",2.65810695251943,0.334425885156522,1.03241839451434,0.3239247  
64352768,0.745994994727506,0.834806879332208,0.0603822199175584  
"Gm28906",20.5931702353936,0.851498505680263,0.532867437625121,1.59795  
559937987,0.11005285890118,0.211827309265076,1.32151198463103  
"Gm6652",3.66579473427252,2.26301443565317,1.13108233521298,2.00075128  
503095,0.0454191996117269,0.10793256411429,5.03803283961272  
"Gm21742",8.80523968435994,-0.970148794725851,1.22461403003317,-0.7922  
07806650373,0.428239517390684,0.571044597871944,-0.543562696390486  
"Rbm3-  
ps",0.4752097089913,2.3937604292973,2.45293637376648,0.975875467010863  
,0.329126180880175,NA,NA  
"Gm28551",12.211466426583,-0.778931824305114,0.726530414473102,-1.0721  
2555563832,0.283663641772974,0.42765967164233,-0.661646158475382  
"Vmn1r215",0.601098477897454,-0.0672050633610385,2.18396003397017,-0.0  
307721122711517,0.975451281067346,NA,NA  
"Gm8226",6.68420369766784,0.910199383953382,1.00245826974667,0.9079673  
5527295,0.363895469286137,0.508801280755905,0.615019675561555  
"Bcl2a1d",495.152851677439,-1.49954752486254,0.479854243802388,-3.1250  
0627894848,0.00177801264538421,0.00914025611137795,-7.04047590842648  
"Gm5896",0.145457417547646,-1.00439126183141,4.78099034736443,-0.21008  
0169349242,0.833605102687144,NA,NA  
"Gm5619",2.82367603358028,0.586047630463339,1.02389166102977,0.5723726  
96027164,0.567069509512566,0.694168840813411,0.21393086311903  
"Tubb4b-ps2",0.121527413527064,0.4.78471990595379,0,1,NA,NA  
"Gm6501",0.685932135694568,-1.47741878644809,2.1490560390331,-0.687473  
364869913,0.491784479636325,NA,NA  
"Gm5527",0.587621259453387,-0.56866791969158,2.13530062698592,-0.26631  
749764167,0.789994698390256,NA,NA  
"Gm7776",0.259938374402863,0.421743751522223,4.78471990596623,0.088143  
8746281337,0.929762325151573,NA,NA

"Gm8141",0.0976209194645395,-0.0573280105554679,4.78471990596623,-0.01  
19814768015958,0.990440393367744,NA,NA  
"Gm8337",0.478092055813867,1.05342035815859,3.0865568643209,0.34129303  
4427979,0.732882991186417,NA,NA  
"Gm18558",0.24230777665824,-0.0568773066857726,4.78471990596175,-0.011  
8872803013826,0.990515545948759,NA,NA  
"Gm6170",0.385898424999032,-0.543784401612085,3.79758466998063,-0.1431  
92173149061,0.886138411046191,NA,NA  
"Ifnab",0.395665777026624,0,4.78471990595222,0,1,NA,NA  
"Gm29199",0.13546232560422,2.0484181611637,4.76342877305803,0.43003018  
5976446,0.667173683233078,NA,NA  
"Gm5644",0.0905281707773811,-0.0393014571632516,4.78471990596623,-0.00  
821395148214324,0.993446288624688,NA,NA  
"GsdmcL-  
ps",2.31583438996119,-3.80472432142476,2.30081908962882,-1.65363906209  
53,0.0982008709630868,0.194605201955307,-6.2275057226833  
"Gm28439",14866.8416822087,1.95329004783299,2.62155729975651,0.7450876  
8052272,0.456218716101946,0.596283183171722,1.00992827612633  
"Gm6445",2.32286564212582,-1.74896425787769,1.1517192002909,-1.5185682  
9115633,0.128871197673504,0.238693893059559,-2.50551955118742  
"Gm8502",4.52214927031998,-3.93954053068582,4.3169949672072,-0.9125654  
67555881,0.361471123103895,0.506319249876418,-2.68120353809901  
"Ppp1ccb",826.423212619313,0.247415186946951,0.235030854552824,1.05269  
236848792,0.292482007433221,0.436395330649903,0.205158336829804  
"Gm4412",2.69206004431733,2.08048097088378,2.03007190647338,1.02483117  
186621,0.305442855340093,0.450005390814202,1.66125514393157  
"Krtap28-10",0.197329541459206,0,4.78471990594883,0,1,NA,NA  
"Gm7740",0.523209643050396,1.06716994577129,3.04682908025067,0.3502559  
27609661,0.726146637522778,NA,NA  
"H2a11m",3.77402279509583,-0.340924762576766,0.909779598809601,-0.3747  
33356323717,0.707858782185507,0.806344300356409,-0.0733821650677444  
"Gm4849",1.7869633915495,0.127580977258694,1.36696404360314,0.09333162  
62821424,0.925640107590496,0.954473045523269,0.00594474734310965  
"H3c7",4.57829621160504,-1.17870220254249,0.840084237536364,-1.4030762  
034045,0.160594116417247,0.282222990707839,-1.49112638376633  
"Gm8292",0.69021594701377,-0.240762832941399,2.07804756099748,-0.11586  
0116707738,0.90776340501796,NA,NA  
"Gm8296",0.175883269332095,1.35016197527006,4.78471990596623,0.2821820  
2983763,0.777803936766533,NA,NA  
"Gm29257",26.9726838761282,0.712476625523593,0.420202278050495,1.69555  
631356662,0.089969937048045,0.181950048930634,1.21407661812793  
"Gm29554",0.427942889723796,-0.0803010597748519,3.75309235653046,-0.02  
13959722134539,0.982929786539539,NA,NA  
"Gm28557",111.240182348083,-0.297722392770664,0.241178872772808,-1.234  
44640630326,0.217036605683354,0.352354682565698,-0.310559286133452  
"Gm3841",0.0767966038352438,-0.0544733418287582,4.78471990596623,-0.01  
1384854892098,0.990916396283468,NA,NA  
"Trpc2",90.0492102170192,-0.701655028730238,1.21876093982603,-0.575711  
778907517,0.564810012397103,0.692533368237877,-0.257787255493951  
"C4bp-

ps1",4.83622504320229,1.07174322276086,1.37113927808551,0.781644315708  
984,0.434423635247278,0.576530903896775,0.590237216750907  
"Gm6473",0.713111217010421,2.61750713948543,2.23823654430095,1.1694506  
3119007,0.242222120786306,NA,NA  
"Gm21147",3.85052238674308,-0.915069963976425,2.44475987270287,-0.3742  
98504402703,0.708182244660799,0.806418509783654,-0.196879524839269  
"Gm5256",0.0835486596769126,0.898409441555409,4.78471990596623,0.18776  
6360249249,0.851059807318405,NA,NA  
"Gm7895",0.121656728899502,0,4.78471990596558,0,1,NA,NA  
"Gm28188",0.438272706339505,0.380726826452097,3.11079242424507,0.12238  
9016857816,0.90259093639733,NA,NA  
"Gm7867",0.854588960713504,0.707221553949568,2.64363925025171,0.267518  
177407236,0.78907022046572,NA,NA  
"Gm28649",0.0886915477092957,-0.544048378937457,4.78471990596623,-0.11  
3705376621746,0.90947135024012,NA,NA  
"Gm7063",0.0961936984481722,0,4.78471990596623,0,1,NA,NA  
"Gm28677",0.0810182756847091,0,4.78471990596022,0,1,NA,NA  
"Gm28688",0.0778527997966676,0,4.78471990596551,0,1,NA,NA  
"Gm28911",0.291114928538997,2.81748781910325,4.71505160967024,0.597551  
851463255,0.550138999398713,NA,NA  
"Gm7539",0.0721532113593249,-0.544048378937457,4.78471990596623,-0.113  
705376621746,0.90947135024012,NA,NA  
"Gm3489",0.127284068578383,-0.54955061725992,4.78471990596623,-0.11485  
5337001998,0.908559786644654,NA,NA  
"H2a11k",0.148177164577155,2.59891947282788,4.7275994170606,0.54973343  
6265582,0.582502219767124,NA,NA  
"Gm9443",1.3638568466276,0.675927489606183,1.39195097398405,0.48559719  
5762966,0.627252785064134,0.743683362634516,0.200169114451195  
"Gm28918",0.369701452900208,-0.0450992165300027,4.78471990595318,-0.00  
942567536166327,0.992479510511541,NA,NA  
"Gm4131",78.8667209940624,1.98955945799023,0.795057008190934,2.5024110  
6926062,0.0123350610701924,0.0397493998767156,6.41664864681527  
"Gm28455",8.78344129877804,-0.779491910422638,0.700207892814304,-1.113  
2292543714,0.265609981464328,0.40753723126704,-0.699689855730481  
"Gm13283",2.21709466654442,0.319123218433257,1.3111217569492,0.2433970  
88593674,0.807697798973543,0.877548851241844,0.0416847218280038  
"Ovo13",2.16385954900637,0.744668490897087,0.999185780044131,0.7452753  
08926231,0.456105304426235,0.596174916250099,0.385158309117002  
"Gm12960",1.76427584740479,-3.40439009384047,2.05487127309656,-1.65674  
129489886,0.0975717903105715,0.193612816199155,-5.58965075636451  
"Gm29627",0.53964145835769,1.31501130770873,3.55077492943477,0.3703448  
7790474,0.711125539430858,NA,NA  
"Gm8173",27.6134814040552,0.421886341173742,0.572848925903504,0.736470  
510978681,0.461444407366043,0.600766318890448,0.214971864738856  
"Gm21489",0.106120312653731,-0.0522341223824204,4.78471990596623,-0.01  
09168610512159,0.991289778126075,NA,NA  
"Vmn1r90",51.0224833533345,-0.0277881620447152,0.454516884124094,-0.06  
11377993102856,0.951249465944536,0.969903366991924,-0.0008491738340097  
04  
"Gm19087",3.57907561450607,-0.983698701008458,0.955391611680476,-1.029



62878151944,0.30318429906516,0.447806034631656,-0.790298715019415  
"Gm5511",5.32033225676742,-0.0921635397015055,0.993490683206892,-0.092  
767392044393,0.926088356647639,0.954712466249458,-0.00427132535764454  
"Gm28374",3.45357906549056,0.0133912818405699,0.930020524624918,0.0143  
989100089707,0.988511728987366,0.992430960908072,0.000101744678061345  
"Gm20379",1.3908155032855,2.28054890266957,1.66842321097216,1.36688874  
122096,0.171660181513906,0.296696234301758,2.77097283388332  
"Gm29428",0.114299510757757,1.34449824254322,4.78471990596623,0.280998  
317344912,0.77871169042408,NA,NA  
"Gm28230",1173.28264355394,0.362668128199903,0.276678489449789,1.31079  
264210642,0.189927829096685,0.319407694646124,0.413908402820918  
"Gm28659",0.100532412451372,0.4.78471990596383,0,1,NA,NA  
"Gm28778",2.06690917279097,-2.76174833986522,1.67848655410205,-1.64538  
00795221,0.0998914549624046,0.197173880224435,-4.48416599047657  
"Gm19587",0.559595286469847,-0.764178324794125,3.77112765838064,-0.202  
639208751228,0.839417041576667,NA,NA  
"Ifna7",0.804846151769642,-0.515917673856186,2.37032296574021,-0.21765  
7121545491,0.827696274710804,NA,NA  
"Gm10075",0.617681775528548,0.442407754101018,2.36310406465738,0.18721  
4672733916,0.851492321051551,NA,NA  
"Gm5147",0.404028171340857,-1.08564658396743,2.68337063300109,-0.40458  
3165148991,0.68578393521116,NA,NA  
"Rps23-  
ps1",15155.9570418032,0.00594302468084286,0.176509943338026,0.03366963  
11179572,0.973140596092857,0.983531792588562,9.86858010886753e-05  
"Gm7329",1.34308176608477,-0.931497550122947,3.00751706767218,-0.30972  
311350636,0.756771524474492,0.842162615387458,-0.160014655115079  
"Gm18254",5.79634878645549,0.891399269233997,0.833727811945639,1.06917  
300402127,0.284991720739085,0.429162635569961,0.754051870812932  
"Gm29667",0.110656050330836,-0.0739327399289669,4.78471990596623,-0.01  
54518428208886,0.987671703762077,NA,NA  
"Gm15459",23.6283681193935,0.306651962065834,0.554829085626592,0.55269  
6262704971,0.580471412914405,0.704953697228593,0.107212626776164  
"Gm2693",3.9622714814985,0.286214246369093,0.676664111253429,0.4229783  
1613815,0.67231108172364,0.778475373929642,0.0716731765150451  
"Gm29094",3.54795612600218,-2.00925420894227,1.15457905588393,-1.74024  
827377802,0.0818154324488389,0.169160500457647,-3.57025848728892  
"Gm8307",0.384983717538759,-1.59388072624924,4.76112474269375,-0.33476  
9789154369,0.737798751591316,NA,NA  
"Gm28845",6.55504960658277,0.45785062234182,0.976444788028125,0.468895  
556569485,0.639144292566023,0.75319636903273,0.129768282737344  
"Gm10925",24.2654553951514,1.59907113124472,4.01524476973453,0.3982499  
75517793,0.690445930893104,0.79278692424202,0.371305578722834  
"Gm12669",0.731899269360257,1.60309383572688,1.90708316860353,0.840599  
855380586,0.400572139775245,NA,NA  
"Gm9320",9.69073331315106,-0.244318609124469,0.512904809033643,-0.4763  
42987668192,0.633830044550593,0.748813507707904,-0.0706728993900585  
"Gm18981",0.0903733511591684,-0.059805787893919,4.78471990596623,-0.01  
24993289198277,0.990027238114605,NA,NA  
"Gm6610",0.605050259781947,-1.74689228794991,2.02531903863546,-0.86252

6967171981,0.388397599943547,NA,NA  
"Olfr1167",95.0769367767888,1.33213010484023,0.313335780310027,4.25144  
585633393,2.12394861071781e-05,0.000300964752992558,10.8016001338472  
"Lhb",0.354766190837183,-2.46088040045,4.73900086766012,-0.51928253848  
6865,0.603563728274838,NA,NA  
"Gm8520",1.15607337380507,-0.261076071371557,1.98713654547504,-0.13138  
3055666738,0.895472292087911,NA,NA  
"Olfr10",0.297617727897873,0.424427788502343,4.7646266858569,0.0890789  
177171416,0.929019192001879,NA,NA  
"170020D05Rik",20.4938589817583,0.132918665215013,0.417174789943319,0  
.318616245322667,0.750017533022466,0.837418648506673,0.023583912438012  
5  
"Gm28900",1.07669196964879,-2.94583840181423,4.27834242664865,-0.68854  
6663180907,0.491108595644083,NA,NA  
"Scgb1b13-  
ps",0.0995168471906041,-0.05731582904887,4.78471990596623,-0.011978930  
8831643,0.990442424570984,NA,NA  
"Gm7654",4.2822843845146,1.87444648686872,0.685472577763651,2.73453169  
050772,0.00624690817814271,0.0235959348425855,7.02295272712306  
"Gm21156",1.04930633321493,-0.159073421399712,2.39564230903603,-0.0664  
011571342304,0.947058448978113,NA,NA  
"Gm29666",408.208290998097,0.359432214226633,0.222762163932299,1.61352  
452266477,0.106630599944033,0.206771102705992,0.566516525862417  
"Gm28136",1.28084777320031,0,4.75544096737374,0,1,NA,NA  
"Gm20921",0.125853827109757,-0.0666508559952926,4.78471990596623,-0.01  
39299389107779,0.988885876248012,NA,NA  
"Ly6g6g",113.682378843254,1.20001583139304,0.25011290690666,4.79789646  
297972,1.60340618951044e-06,3.97783030220934e-05,12.1587871400907  
"Ms4a12",45.5103818949465,0.549085114749431,0.457241092316096,1.200865  
63516877,0.229803326477952,0.366519857641481,0.551118144826166  
"Gm4017",47.1348371199638,0.495733702709051,0.441363552402651,1.123186  
76975121,0.261358180356329,0.402927621165486,0.450621109498935  
"Gm8498",1.89282777544981,-0.658403479775171,2.13418385956882,-0.30850  
363562781,0.757699134237055,0.842854396336032,-0.112561354659257  
"Gm28069",0.609128889227704,-2.63445527617844,2.28031679513247,-1.1553  
0231667894,0.247966647602361,NA,NA  
"Gm8531",0.0941060047816929,-0.544048378937456,4.78471990596623,-0.113  
705376621746,0.90947135024012,NA,NA  
"Gm28819",0.525713530649238,-1.65616308802286,3.56811428737975,-0.4641  
56401570608,0.642535694955902,NA,NA  
"Gm28437",5.78888261956693,-4.16918009786692,4.72001307756393,-0.88329  
8420863421,0.377075056787631,0.522359464102681,-2.7074626352365  
"Gm17971",66.432347796441,0.662026648386731,0.31009752143629,2.1348982  
2595292,0.0327693242802378,0.08413698772927,1.63872052242058  
"Gm19637",0.276969512726179,-0.0444663317213842,3.24931652196591,-0.01  
36848261536802,0.989081429290689,NA,NA  
"Gm8000",5.71504544750963,-0.935855237553636,0.716121813468803,-1.3068  
3805457688,0.191267717874413,0.321032319802051,-1.06333133266105  
"Gm17981",47.4737286879677,0.412515388395683,0.538744818786189,0.76569  
7179835705,0.443856505497394,0.58512278375967,0.221080843547253

"Gm29639",0.225627969768802,2.95481291499944,4.70759380625411,0.627669  
47120075,0.530220488416246,NA,NA  
"Gm21139",2.64851008978229,-2.45306434529471,2.41025805187448,-1.01776  
004581208,0.308792003778701,0.453682954538249,-1.93879574986006  
"Gm28305",0.10520797220551,-0.0614022108466846,4.78471990596623,-0.012  
8329791614594,0.989761045093057,NA,NA  
"Gm7593",0.178683251733687,-1.46952888786387,4.76580202697859,-0.30834  
8705956533,0.757817008274531,NA,NA  
"Hoxd4",3214.68073075196,0.268657000400077,0.257101789444051,1.0449441  
0941679,0.296048801709357,0.440402802756469,0.220316340058465  
"Gm2914",0.542378734542224,1.08169635963021,2.69177026721581,0.4018531  
49507089,0.687792104057103,NA,NA  
"Eif4a-ps4",0.312788995694129,0,4.78471990594985,0,1,NA,NA  
"Gm8524",0.0868380920598243,1.37278480000875,4.78471990596623,0.286910  
169662591,0.774181103451778,NA,NA  
"1700007E05Rik",9.35404014222207,-1.60819808669487,0.688244413666654,-  
2.33666711238108,0.019456499859132,0.0562350556873169,-4.6287397754707  
9  
"Gm6750",0.208095190753481,-1.36451689022702,4.77036588656554,-0.28604  
0300193706,0.774847255371972,NA,NA  
"Gm29216",160854.720955843,1.77034121748332,0.425943233051286,4.156284  
4062607,3.23465121652677e-05,0.000413027042697047,13.79449432035  
"Gm8326",1.55940029668959,-0.878534270661627,1.44916125570496,-0.60623  
6377906925,0.544357799517348,0.67459826452526,-0.34582441082019  
"Gm18342",2.85891766069765,-0.767996826945054,1.38233655882304,-0.5555  
78756883164,0.578498856899943,0.703434406724982,-0.270166419341007  
"Gm8449",0.167411724685723,-1.38296167455407,4.76914167930786,-0.28998  
1251879012,0.771830580500136,NA,NA  
"Gm3454",0.0721532113593249,-0.544048378937457,4.78471990596623,-0.113  
705376621746,0.90947135024012,NA,NA  
"Gm28308",14.8684580751853,-0.507397738386792,0.486396508884195,-1.043  
17717976795,0.296866240480192,0.441181246713627,-0.415203314450107  
"Gm29214",1.39665423205192,-0.518343623222394,1.45934182611124,-0.3551  
90000004072,0.722447255794799,0.816753891388125,-0.104921801710576  
"Gm7356",0.179222461381284,-1.08829815722357,4.77955813058661,-0.22769  
8487493863,0.819880648360904,NA,NA  
"Gm29397",0.21895931231667,0,4.78471990594807,0,1,NA,NA  
"Gm21135",0.220934797106265,0,4.78471990595636,0,1,NA,NA  
"Krtap28-13",0.529991436325871,-2.68573519543195,2.94367451681363,-0.9  
12375053726766,0.361571317014104,NA,NA  
"Gm12663",0.28872889214277,-1.43572422563013,3.92794719290645,-0.36551  
5154639282,0.714726896469647,NA,NA  
"Rpl30-  
ps6",0.384671711308147,1.29751441708698,3.15346146785046,0.41145719721  
4915,0.680737320746708,NA,NA  
"Gm10193",0.182732806477027,0,4.78471990596015,0,1,NA,NA  
"Dnah7c",48.9616575591981,1.23608086207146,0.555147431247794,2.2265812  
5120591,0.0259752731503654,0.0705141380878039,3.27801481411234  
"H3c10",1.81052590496787,-2.26898609509592,1.72198104444684,-1.3176603  
2060173,0.187617383085706,0.316504962431457,-2.6102787208542

"Gm7358",0.2396895247302,0,4.78471990595546,0,1,NA,NA  
"Gm18291",0.624183097373362,0.79763395298558,3.13442018851144,0.254475  
757879923,0.799128030190646,NA,NA  
"Ms4a4a",49.4492454868964,-1.284883149607,0.46942088479587,-2.73716656  
250976,0.00619709073505726,0.0234531978167986,-4.82184321719545  
"Olfr1217",1.65735310457415,1.10842811665787,1.16431082902201,0.952003  
613664671,0.341095149204634,0.485663299196141,0.800550785111021  
"Mug-  
ps1",2.71112161852231,1.1773551128774,1.11091649660987,1.0598052297092  
4,0.289233217127711,0.433138960641791,0.985089110823562  
"Gm29596",4.41616253586893,-0.924588573999721,0.855376220565725,-1.080  
91451664184,0.279735140619438,0.423468615822811,-0.794476655302342  
"Gm7901",0.2577062699403,-0.0603606994479183,4.7847199059658,-0.012615  
304685371,0.989934710137383,NA,NA  
"Gm29441",0.081018275684709,0,4.78471990596022,0,1,NA,NA  
"Gm336",0.0781827566786718,-0.544048378937456,4.78471990596623,-0.1137  
05376621746,0.90947135024012,NA,NA  
"Gm28530",6.89150941012251,1.31677787932691,0.773370970482324,1.702647  
15070141,0.0886341206238923,0.179944615152504,2.2584138640844  
"Gm3052",125.102958218102,-0.902470262152733,0.304837387033776,-2.9604  
97302953,0.00307142810983523,0.0137638945726424,-3.8677226240923  
"Olfr1220",32.3234361014482,0.297810627537552,0.39987838570428,0.74475  
3000372945,0.456421052325637,0.596467672804643,0.153887755168203  
"Rps27a-  
ps1",9.50627668648051,0.0780459017296584,0.551743186398271,0.141453313  
160304,0.887511839811993,0.930210495761664,0.00564618228765647  
"Rpl7a-  
ps10",1.17024234768523,-1.32382177432083,1.77165918329236,-0.747221467  
201561,0.45492988791408,NA,NA  
"Csnk2a3",1.71698918669255,-3.28576731868397,1.45657726529214,-2.25581  
395301055,0.0240822851355912,0.0663965491478729,-8.91136304180647  
"Gm5703",0.411348654179059,-1.04987092975363,3.84525349190542,-0.27303  
0355986593,0.784829881055227,NA,NA  
"Vmn1r206",8.72866924948648,0.648895184722203,0.665164315398808,0.9755  
41185388379,0.32929188256578,0.474049994556083,0.484362936850353  
"Gm29036",7.37874421466128,-0.280884146827252,0.63302001639121,-0.4437  
2079800659,0.657244456778874,0.766673791102272,-0.0746291968444083  
"Rbm6-  
ps1",0.811317504091008,0.481663608372166,1.67035075012514,0.2883607579  
64206,0.773070603094241,NA,NA  
"Gm5621",0.443535227432069,-1.00236271125119,2.14619341335866,-0.46704  
2115129111,0.640469746866469,NA,NA  
"Ace3",2.39687355738993,1.9657719085577,1.05999861945248,1.85450421583  
858,0.0636670575699186,0.139543647538025,3.87134763733492  
"Gm8495",2.39105785929321,0.299542431285773,1.2272093286631,0.24408421  
9610757,0.807165593917557,0.877166132549578,0.0392576930910611  
"Gm28882",0.229364320476487,-0.0669372570302538,4.78471990596033,-0.01  
39897963404023,0.988838121582463,NA,NA  
"Gm8597",0.242627493708257,-0.638251076277685,4.76147408491347,-0.1340  
44849325119,0.893367109793701,NA,NA

"Gm18666",0.538647374124939,-0.161391973545908,2.44177246160721,-0.066  
0962379105862,0.947301206016116,NA,NA  
"Gm29609",53.4340637001446,-0.0563083863802315,0.440606420502783,-0.12  
7797471303249,0.898309251263156,0.937545968372177,-0.00363129908712404  
"Gm29228",0.0856889837108837,0,4.78471990596623,0,1,NA,NA  
"Gm28453",0.604212080052856,-1.53469061166144,2.23218435365127,-0.6875  
28612567815,0.49174967653452,NA,NA  
"Gm29423",0.412485052458447,0,4.54192868599542,0,1,NA,NA  
"Gm29335",0.242522923747321,1.31632249108874,4.78471990595856,0.275109  
623334374,0.783232018399333,NA,NA  
"Olfr1392",30.2149170767001,2.16391794933626,0.562878571048494,3.84437  
791850106,0.000120858632451792,0.00115553879680584,14.6349851046696  
"Gm2427",2.20804034611185,-3.04748207768281,1.62912218310453,-1.870628  
31093208,0.0613966176848647,0.135927245556886,-6.08166340621023  
"Gm5835",1.18815094584136,-1.39536369554495,1.90851028954234,-0.731127  
153566225,0.464701490072746,NA,NA  
"Gm28503",10.4320364249498,-0.216207133967454,0.482288372719276,-0.448  
294311447771,0.653940805533602,0.764374907157495,-0.0580941853582788  
"Gm18800",2.86538802695534,-0.041097444809182,1.35548056093707,-0.0303  
194645453052,0.975812273245903,0.984806518540972,-0.000629205372559978  
"Gm11993",2.74350465752104,2.29974784555547,0.928958365752668,2.475619  
93124649,0.0133005082270768,0.0421748754938272,7.28084208270662  
"Gm8203",3.22759368519498,-2.20415487722347,1.94687513590791,-1.132150  
09867368,0.257571335436508,0.398518163651883,-2.02782734001206  
"9130401M01Rik",853.636657690284,-0.179652654916483,0.173074677840864,  
-1.03800658280969,0.299266990401103,0.443633222750757,-0.1460139767140  
46  
"Gm9230",0.0799430234953366,-0.0609655631202176,4.78471990596623,-0.01  
27417203761912,0.989833853115942,NA,NA  
"Gm29427",18.1273369168447,0.259839653445335,0.576539074403828,0.45068  
8713013984,0.652213918338489,0.763134120245071,0.0702402404634954  
"Mrgprc2-  
ps",123.500782007753,0.207356630969232,0.341001038900349,0.60808210918  
6265,0.543133017429682,0.673578906872149,0.081936999802093  
"Gm10074",0.100532412451372,0,4.78471990596383,0,1,NA,NA  
"Gm5268",0.121027145626612,1.38118620363153,4.78471990596623,0.2886660  
51676146,0.772836944055207,NA,NA  
"Gm28438",22577.5348193223,0.623523617221909,0.501684598661669,1.24285  
979455073,0.213919503610154,0.348600290964545,0.657087464072995  
"Akp-  
ps1",4.87658672199522,-0.652899052704742,0.71491874747865,-0.913249309  
80949,0.361111435473442,0.506106294483983,-0.444629846062  
"Gm29376",1.34055684161543,-3.30599214518564,1.85998537822015,-1.77742  
910449608,0.0754976657218816,0.159037757805234,-6.07844223362337  
"Gm19085",0.293571234740103,-0.0471557841338316,3.94673406050555,-0.01  
19480520883617,0.990467060521537,NA,NA  
"Ldhal6b",5.9595472249325,-0.000797987725290141,0.641439747278799,-0.0  
0124405718335272,0.999007386236688,0.999520013179543,-3.83115543588391  
e-07  
"Gm28693",6.86758765516725,0.316983768762197,0.660057800438463,0.48023

6380134635,0.631059320915218,0.746535289358386,0.0926582830490679  
"H3c11",2.61095582920449,-2.69340013654412,1.74120805837271,-1.5468571  
5104105,0.121897695423416,0.229372830087412,-3.96577992289833  
"Gm29516",0.547061453227674,3.46880317617804,3.40777020366682,1.017909  
94370617,0.308720755620763,NA,NA  
"Gm18875",0.0898118073046914,-0.06599604795012,4.78471990596623,-0.013  
7930849134611,0.988995059449653,NA,NA  
"Iqank1",242.910865596075,0.176193340872666,0.271555560198521,0.648829  
803904071,0.516448390973071,0.650051408015622,0.0758871467281935  
"Gm29106",0.0892173133308551,0.880985478376438,4.78471990596623,0.1841  
24775470745,0.853915570731283,NA,NA  
"Bcl2a1a",289.958007466035,-1.34034334550879,0.529343308697926,-2.5320  
8706615326,0.0113385833020313,0.0374014036919315,-4.40443128764483  
"Ly6a2",6.75504482525019,-0.465622982803017,0.935527878679412,-0.49771  
1498945696,0.618687402063714,0.736951980294355,-0.142123287843843  
"Gm4064",0.258408856068483,-1.01686911026971,4.7815186098741,-0.212666  
559149183,0.831587052007893,NA,NA  
"Gm20257",244.015836684785,-1.02126494722589,0.395451675856393,-2.5825  
2780194757,0.009807945944465,0.0332583182652484,-3.47582456227676  
"Gm28661",1038.62409885794,1.32459257668684,0.496879146445569,2.665824  
44878665,0.00767997851150093,0.0276077103645364,4.75483723287146  
"Olfr1034",140.253055419821,-0.983406799588646,0.262254409734099,-3.74  
981988133479,0.000176961631434793,0.0015383838025111,-6.36954835360932  
"Rpsa-  
ps1",0.374827846880513,-0.0460348253875266,3.22241301015421,-0.0142858  
240835254,0.988601949221489,NA,NA  
"Gm37108",0.788674269241667,1.31085210218064,2.00541989760984,0.653654  
680370419,0.513334307149254,NA,NA  
"Gm9113",0.430506886706321,1.37257323561194,3.69886307451115,0.3710797  
63690184,0.710578122947232,NA,NA  
"Gm6119",3.54062126327547,0.297202782655234,0.915316642654301,0.324699  
419638414,0.745408573941843,0.834518625098648,0.0537640479518215  
"Gm37191",0.369036148522583,0.409221748275837,3.80423511530042,0.10757  
0046506844,0.914336758508852,NA,NA  
"Gm7897",0.0810182756847091,0,4.78471990596022,0,1,NA,NA  
"Gm7299",0.18335377783122,0.860598090295498,4.78471990596623,0.1798638  
38888958,0.857259464553546,NA,NA  
"Pcdha11.1",6.58789445559839,0.242418385849812,3.69865117267046,0.0655  
423759994062,0.947742167680099,0.967693589517521,0.00796096683973129  
"Pcdhga10",209.080409131571,-0.349921113655817,0.324072406301363,-1.07  
976213602838,0.280248116274098,0.424080541025407,-0.300173489067824  
"Gm19035",0.483763535065688,-0.0807394773566983,2.98848307920839,-0.02  
70168761932843,0.978446273688621,NA,NA  
"Gm30280",0.0831584834917216,0,4.78471990595975,0,1,NA,NA  
"Snrpn",978.936591961488,0.128732048113611,0.400839697983724,0.3211559  
35305685,0.748092223259986,0.836178753102684,0.0230318200927891  
"Gm7496",0.099023208547569,-0.0670077913781695,4.78471990596623,-0.014  
0045379238637,0.988826360652779,NA,NA  
"Gm8826",1.60514291929475,1.03293997953182,1.30982057774679,0.78861181  
2244337,0.430338924913091,0.572841593544606,0.575498431077647

"Gm7357",32.2986503062221,0.346440115115198,0.379752950025408,0.912277  
613885605,0.361622595646938,0.506423787711954,0.235711422698528  
"Gm37000",0.155705599593335,0,4.78471990595973,0,1,NA,NA  
"Gm33707",0.11816756841314,0,4.78471990596588,0,1,NA,NA  
"Pcdha3",3.73971083865213,1.81950598824337,2.46305097244001,0.73872039  
5396803,0.460076798488517,0.599618143593097,0.930608633397947  
"Gm37232",0.0791707833995167,-0.0536058393108665,4.78471990596623,-0.0  
112035480371638,0.991061048997418,NA,NA  
"Ighv8-5",0.192839077014815,-0.520868012064422,4.78471990596339,-0.108  
860711243566,0.91331296927401,NA,NA  
"Gm33815",0.130003913228484,-0.916538966587167,4.7808349176278,-0.1917  
11067706547,0.847968536022938,NA,NA  
"4933424G06Rik",1.47682415158974,-1.42510708530212,2.14094500318493,-0  
.665643948434963,0.505638708380817,0.640469577657431,-0.63496167286874  
1  
"Sh2d1b1",123.458278922032,-0.973570276827206,0.460855547197032,-2.112  
52806383379,0.0346411814861544,0.0877528591161542,-2.36892121727147  
"Pcdhga12",205.562720188021,-0.655693587697173,0.213055391855288,-3.07  
757331080612,0.0020869349851749,0.010306752365993,-2.99976933222788  
"Flg",1.17776740705343,0,3.38544528416743,0,1,NA,NA  
"Pcdhga9",20.271647219231,-0.895809582232882,0.500358615339807,-1.7903  
3508121873,0.0734000598202307,0.155797340123542,-1.66548847482609  
"Gm37102",334.167794837199,1.08330470606632,0.378512505369304,2.862005  
06112571,0.00420970184601934,0.0174352403892995,4.3865843761747  
"Gm5100",0.0881384021429833,-0.0634852583245971,4.78471990596623,-0.01  
32683332718045,0.989413712352724,NA,NA  
"Gm37246",0.9961953325349,2.2868861447704,1.61831524358962,1.413127728  
87055,0.157618171459093,NA,NA  
"BC085271",2.37781628720656,0.386093598037139,1.80821205770037,0.21352  
2300325859,0.830919597011438,0.89214043516129,0.0440655265302342  
"Catspere1",0.43346653179077,3.50014537036616,3.48168614810269,1.00530  
180535472,0.314751546054176,NA,NA  
"Gm8010",1.91133845957515,-1.10813211090056,1.31369579597011,-0.843522  
613302001,0.398936224176611,0.543264317571976,-0.676137118403881  
"Ighv1-2",0.24514970321138,-0.103058133794871,4.78102719833962,-0.0215  
556468347768,0.982802414000726,NA,NA  
"Pcdhgc5",121.921825386194,-0.645752779512565,0.269807100340207,-2.393  
38690011612,0.016693627197498,0.0500757450918179,-1.93352493048191  
"Gm9722",0.24951465922451,2.06009048705118,4.76320632500534,0.43250078  
7596866,0.665377479910051,NA,NA  
"Gm8276",0.129960745387559,-0.546096176982043,4.78471990596623,-0.1141  
3336364812,0.90913207465544,NA,NA  
"Gm37568",7.85037856550119,-0.793079656717271,0.571091234146005,-1.388  
70921018989,0.164921192386708,0.287671217760645,-0.988127332641044  
"Gm37037",0.0936523162218741,-0.544048378937456,4.78471990596623,-0.11  
3705376621746,0.90947135024012,NA,NA  
"Ighv1-13.1",0.150798618677057,0,4.78471990596031,0,1,NA,NA  
"Rpl21-  
ps1",0.725697228102568,0.273412375195538,1.81064704556661,0.1510025799  
14728,0.879973680758755,NA,NA

"Snurf",2.32916451493037,1.45810903273111,2.98909237206104,0.487809960  
762676,0.625684455360924,0.742564703306792,0.433999256155253  
"Thap6",579.06278320767,0.270609844595076,0.162599874872128,1.66426846  
765958,0.0960587908573819,0.191332547158773,0.447518941462924  
"Dchs2",13.2292943519017,-1.5777938759965,0.634139633043744,-2.4880858  
9430596,0.0128432709925269,0.0409782519738652,-5.04059985764028  
"Pcdhac2",1.83308999815197,-4.16862169082095,2.15178787751754,-1.93728  
282159029,0.0527107809621899,0.121040490778563,-8.80258726641371  
"Gm7369",0.176405525517367,-0.0548265685787112,4.78471990596623,-0.011  
4586788059101,0.990857497164451,NA,NA  
"Pcdhga11",32.8663796935847,-1.6978720056613,0.546311154991684,-3.1078  
8456385655,0.00188431653268729,0.00954165953657949,-7.89864973354369  
"Gm37601",41.5290925214768,1.25324052304209,0.280786398003352,4.463323  
47988996,8.06980824327269e-06,0.00014371822384997,11.088240975739  
"Pcdhgb2",79.1679526874608,-1.53394665399288,0.358260410587317,-4.2816  
5269915866,1.85510356793613e-05,0.000272297698950739,-12.5915769129936  
"Gm7694",1025.14627927875,0.151092165845039,0.290604376956707,0.519923  
916588317,0.603116605141532,0.724602105308373,0.0486717114751972  
"Naaladl2",222.830317026851,-0.0689534403078215,0.283442871856201,-0.2  
43271033264169,0.807795442547449,0.877557139446744,-0.0090062301504258  
5  
"Gm38164",21.4634184912264,0.226454888372468,0.535979257968569,0.42250  
6813474016,0.672655128544098,0.778687386312288,0.0566466973040725  
"Mgam2-ps",0.243264113008745,0,4.78471990596166,0,1,NA,NA  
"Gm37240",13.236387673344,0.111909817801823,1.17731206570971,0.0950553  
562316215,0.924270858013306,0.953406242643775,0.005339686137456  
"Pdcd5-  
ps",16.4274122862521,2.56377169282579,3.42052945509536,0.7495248108466  
63,0.453540950230562,0.59400290163088,1.33539451700696  
"Gm38181",0.0951534022100515,1.35102900169663,4.78471990596623,0.28236  
323719012,0.777665001002686,NA,NA  
"Gm8242",9.37260058188451,1.70874019678502,0.588101775429699,2.9055178  
3411387,0.00366645954286888,0.0157429262644478,7.09360277864555  
"Gm5190",0.124404047248317,-0.0826218971220171,4.78471990595978,-0.017  
2678649421264,0.986222921840982,NA,NA  
"Gm7626",0.134131519943472,-0.0397646395823793,4.78471990596414,-0.008  
31075598235392,0.99336905244495,NA,NA  
"Gm7558",0.0778527997966676,0,4.78471990596551,0,1,NA,NA  
"Gm32460",0.529722394507227,-0.944206014460902,2.63927918751695,-0.357  
751472040825,0.720529309791449,NA,NA  
"Pcdhgc3",370.408459322043,-2.50803672062259,0.380218753293017,-6.5962  
9936424982,4.21547314951237e-11,1.24535296165443e-08,-45.6494328328661  
"Gm37550",0.123963006248955,0.389666740904301,4.78471990596623,0.08143  
98227194892,0.935092180322775,NA,NA  
"Gm6101",0.0963268604660417,1.35405149279484,4.78471990596623,0.282994  
933748666,0.777180720616471,NA,NA  
"Trbv24",0.121527413527064,0,4.78471990595379,0,1,NA,NA  
"Gm37348",40.900481874068,0.634894781696946,0.618277364508696,1.026876  
96193027,NA,NA,NA  
"Zc3h11a",3283.78716694257,-0.240488239823572,0.203316007494688,-1.182



82983611044,0.236876593385025,0.374979282115873,-0.235891187411259  
"Gm38076",0.116779199695001,0,4.78471990596232,0,1,NA,NA  
"Gm37682",0.0789318165836824,0,4.78471990596069,0,1,NA,NA  
"Gm8797",40.7180378334953,-0.0693502953862325,0.470195433732799,-0.147  
492490166637,0.882743306884617,0.927053739965106,-0.00525285096330949  
"Pcdhgb1",19.7231383341331,-2.71783061498483,0.805841367461951,-3.3726  
6207063161,0.000744452590640044,0.00468387757737966,-14.5774350218927  
"Gm7871",0.0877507952084352,-0.0742044421009506,4.78471990596623,-0.01  
55086282079799,0.987626401006893,NA,NA  
"Gm18186",0.428407221603599,0.866553381776189,3.78730219735218,0.22880  
4921450954,0.819020541489931,NA,NA  
"Gm37904",0.171034602457794,-0.561761606182117,4.78471990596164,-0.117  
407417199526,0.906537206649832,NA,NA  
"Pcdhgb8",100.890670872167,-0.399966542930348,0.239873248028168,-1.667  
4078756935,0.0954333289015286,0.19058995171651,-0.662996943872924  
"Pcdhgb6",79.6381053340935,-1.81404990589428,0.395924401154513,-4.5818  
0880138865,4.60971269989993e-06,9.33335184035814e-05,-16.8331699999981  
"Pcdha5",7.71913463447462,-5.699249535036,1.81929492800855,-3.13266939  
147385,0.00173224439767322,0.00896848148322688,-26.8664840410125  
"Gm37559",5.70369460082087,0.478003654767202,0.844856603001725,0.56578  
081187847,0.571542791949759,0.697848416146058,0.171963425029284  
"Gm18752",13.0927272808673,-0.982049050968303,0.798621120772253,-1.229  
68079033357,0.218816663029513,0.354259430217546,-1.01909761793742  
"Gm37981",0.24922914463143,0.000197775095718399,4.78329457967154,4.134  
70448922214e-05,0.999967009831255,NA,NA  
"Pcdhga1",29.5708118323136,-1.28214704577254,0.42832651058112,-2.99338  
708695155,0.00275899577249354,0.0127137160012467,-5.5966665646915  
"Fgfr3-  
ps",0.358017329916684,-0.0706789401774908,4.78471990594691,-0.01477180  
30661825,0.988214235020929,NA,NA  
"Gm37732",0.274853460422604,2.25223290171957,4.74224919837167,0.474929  
259831582,0.634837395228273,NA,NA  
"Gm17970",1.51769160981886,-0.0860961777850471,1.3451457520506,-0.0640  
050921275989,0.948966172192424,0.968428323871889,-0.00276203479698564  
"Gm34767",0.405349127224966,1.9862900876548,3.6416440631067,0.54543773  
4505081,0.585452493788263,NA,NA  
"Ighv1-15",31.1903444127065,-1.67175519297356,1.70387781952397,-0.9811  
47341562682,0.326520087487288,0.471417154078278,-1.25717979816367  
"Pcdhac1",0.732547633674196,0,4.78471990594474,0,1,NA,NA  
"Gm8146",1.12301734136974,-0.712756142599925,1.53813717462679,-0.46338  
9192041905,0.643085424252012,NA,NA  
"Gm2053",0.783874937757527,1.1737507034051,2.03203390578165,0.57762358  
2001011,0.563518282192459,NA,NA  
"Ighv1-23",0.284642951583775,-0.0446353906767541,3.93875324347762,-0.0  
113323653241462,0.990958274197745,NA,NA  
"Gm5842",0.154039469816444,1.35430196611902,4.78471990596623,0.2830472  
82335231,0.77714059226472,NA,NA  
"Pcdha12",8.66940340227841,0.749649484816049,1.40184255012998,0.534760  
116067628,0.592815745722103,0.715710304030313,0.25074260765619  
"Gm38356",283.702326369626,0.340391220024049,0.178496673747719,1.90698

914930564,0.0565219926136247,0.127737380999939,0.700449847723314  
"Pcdhga2",26.5681736360498,-1.00873512038506,0.476281299865055,-2.1179  
39798751,0.0341801664760396,0.0869578400247677,-2.46366593814943  
"Gm7804",13.3458091578153,-0.938396197574971,0.764907072471538,-1.2268  
1072165127,0.219893740108616,0.355660567784139,-0.970093779981421  
"Gm38158",0.150857772993023,-0.917034237676945,4.7825539011742,-0.1917  
45719259285,0.847941391608498,NA,NA  
"Gm6546",0.1141091186956,1.37228435523361,4.78471990596623,0.286805577  
380289,0.77426119214558,NA,NA  
"Gm37239",0.118397724875524,0,4.78471990595411,0,1,NA,NA  
"Gm38303",5.94870768608509,2.83054767233953,0.94183264520268,3.0053616  
0724223,0.00265265279092868,0.0123394484712482,12.4401266898896  
"Gm29747",1.05622292604409,0.514740474172481,1.85069266125159,0.278133  
957598541,0.780909529348677,NA,NA  
"Gm5541",8.74613407442968,-0.942339011210888,0.784435489136424,-1.2012  
9573975331,0.229636502431846,0.366310818275168,-0.946365697152863  
"Lsmem2",250.075117649873,-0.77125979622862,0.421561970446492,-1.82952  
887190405,0.0673204181883674,0.145603273858767,-1.48611709992595  
"Gm18300",9.56074962487704,0.53493532270035,0.425206102719152,1.258061  
25377668,0.208369604562043,0.34166937597769,0.574473326622011  
"Gm37339",7.69248142245116,0.734224964605665,0.732606716033408,1.00220  
889126026,0.316242714448398,0.461499921137255,0.567756631751895  
"Golt1a",260.907371691593,1.40308157052536,0.409352428829009,3.4275638  
098423,0.000609023154954408,0.00400902548119549,7.7438977509716  
"Gm5845",0.7739474825302,0.195988859750503,2.63636969246378,0.07434043  
12038441,0.940739506569352,NA,NA  
"Gm36996",0.079319855553513,-0.544048378937457,4.78471990596623,-0.11  
3705376621746,0.90947135024012,NA,NA  
"Gm2272",0.586503870969203,-0.215306084517211,2.92689752870298,-0.0735  
611965932477,0.941359548081089,NA,NA  
"7530428D23Rik",4.20230220996464,0.395333980082174,1.59411820954168,0.  
24799539815547,0.804137967350291,0.875290687623289,0.0526581830716217  
"Pcdha1",0.585084014676917,-1.15872418987826,4.77721828929211,-0.24255  
207104006,0.80835241424863,NA,NA  
"Gm38098",1.20660314542692,1.04714618455302,1.46715249899416,0.7137268  
86108234,0.475396077800832,NA,NA  
"Pcdhga7",50.5173206236818,-0.670053430618761,0.377087135956477,-1.776  
91935557329,0.075581509295591,0.159145601322401,-1.2315151640597  
"Strit1",0.367505779100482,3.22355989661867,4.67653966410913,0.6893045  
13197741,0.490631658408405,NA,NA  
"Gm20162",0.440390479161457,1.1871359076975,2.57736887114056,0.4605999  
24593705,0.645085665714284,NA,NA  
"Gm6558",0.180455702997882,1.37872774584895,4.78471990596489,0.2881522  
37319086,0.773230207899895,NA,NA  
"Pcdhga5",46.7846957090636,-1.92618506122957,0.382055866873265,-5.0416  
3193983492,4.61578436156079e-07,1.48916463357915e-05,-21.408988652444  
"Gm37116",4.99635882258205,-0.0975821116850801,0.649512691817494,-0.15  
0238960553676,0.880576088641457,0.925378493927515,-0.00756773110916963  
"Pcdhgb4",174.438909019508,-0.392280146557861,0.314408698470496,-1.247  
6758705029,0.212149781258368,0.346411224769757,-0.4158674413155

"Gm18445",1.34117364215274,-1.75309301739857,2.30377309505182,-0.76096  
6008833061,0.446677370108974,0.587796616110073,-0.931548543201023  
"Gm38364",0.274205119392616,0,4.78471990595858,0,1,NA,NA  
"Gm17952",0.187006703823692,0.863180563010024,4.78471990596623,0.18040  
3572199429,0.856835750126269,NA,NA  
"Gm38328",0.180304925516808,0,4.78471990595769,0,1,NA,NA  
"Gm19024",0.21105194525436,-0.0590588157252044,4.78471990595865,-0.012  
3432127451506,0.990151791191054,NA,NA  
"Gstp-  
ps",44.3233633242447,0.602745281105632,0.658023137552279,0.91599405356  
4333,0.359670013790229,0.504811829029792,0.41201831148535  
"Gm37203",0.56870058943336,0,4.7847199059514,0,1,NA,NA  
"Gm37201",0.100532412451372,0,4.78471990596383,0,1,NA,NA  
"Pcdhga4",72.9218760816675,-1.48431727049035,0.446435545383232,-3.3248  
1874671556,0.000884760337742652,0.00536413465961015,-7.76004068750884  
"Gm6321",0.087583724926668,0,4.78471990595887,0,1,NA,NA  
"Gm38019",5.71708933976118,0.50387038631096,1.07662953006817,0.4680072  
13473939,0.639779431207981,0.75359221317701,0.142568951296733  
"Gm17877",0.456974088453231,0.399057737244169,2.33967615849148,0.17056  
1099148637,0.864568888009397,NA,NA  
"Pcdha6",1.03102905316257,0,4.78471990594916,0,1,NA,NA  
"Tstd1",496.099651747837,1.77454411243445,0.349782992867314,5.07327156  
728744,3.910338202918e-07,1.31454783242233e-05,19.9448691464365  
"Gm19430",0.256433895760974,-1.04479393269802,4.78146359171172,-0.2185  
09231045718,0.827032366752662,NA,NA  
"Gm37095",2.93775168945756,0.708601058115788,0.986603490750731,0.71822  
2735636781,0.472619961557502,0.610476582341714,0.349705495188403  
"Gm37097",1.03052669842188,-1.06230947918303,1.39828245827398,-0.75972  
4526970268,0.447419264685401,NA,NA  
"Gm38317",0.0810182756847091,0,4.78471990596022,0,1,NA,NA  
"Gm38241",1.71698350307778,1.2928733780795,1.06538823066594,1.21352324  
051052,0.224929834386068,0.360973191529306,1.31737537792572  
"Pcdhgb5",47.5027537396716,-0.763780995020038,0.274604021256608,-2.781  
39042365411,0.00541265995042147,0.0211029881450346,-2.9469272457207  
"Gm38392",11.2810904707939,-1.16878891847774,0.863235820296844,-1.3539  
6248741836,0.175748345907918,0.302101846822939,-1.39902990669387  
"Pcdha9",2.26386707731267,-3.08961244671629,2.89461477370434,-1.067365  
67324377,0.28580674289976,0.429958470493484,-2.60783884378392  
"Gm3745",0.141027465759765,0,4.78471990596093,0,1,NA,NA  
"Pcdhga6",250.074203480761,-0.14901751795245,0.326370543247905,-0.4565  
89974295749,0.647965786697023,0.760033502317185,-0.0408893287362844  
"Pcdha8",0.775576032947504,-3.16762770058532,4.72844954302906,-0.66990  
832232845,0.502916234142836,NA,NA  
"Gm19194",0.643130261401765,3.21747170947501,2.40493338881006,1.337863  
129368,0.1809410582267,NA,NA  
"Gm38008",0.226624498521406,1.09295484710773,4.06051387339928,0.269166  
632890422,0.787801456085621,NA,NA  
"Gm7899",0.65743003694547,1.8638663511487,1.70639378549141,1.092283836  
82372,0.274708362476839,NA,NA  
"Gm19026",0.122644669867131,0,4.78471990595368,0,1,NA,NA

"Gm20056",2.96423734872338,-1.55511487633971,1.12262561132142,-1.38524799421707,0.165976649812087,0.288870188167104,-1.9311072351258  
"Ighv1-38",0.079899338428312,-0.0622401827634659,4.78471990596623,-0.0130081141606338,0.989621319244778,NA,NA  
"Gm37009",3.88015898144428,1.7748601475058,0.995963525216608,1.78205336095997,0.0747405303810178,0.157800851258158,3.2771398933338  
"Pcdhga8",77.094591122237,0.215333852646316,0.481604867974525,0.447117267630498,0.654790391981074,0.764863591112329,0.0577219130622077  
"Tigd5",146.234006197431,-0.0251286229331984,0.175691830679602,-0.143026700991146,0.886269093640811,0.929207656493441,-0.00184501984262112  
"Gm6123",0.0845325879547356,-0.544048378937457,4.78471990596623,-0.113705376621746,0.90947135024012,NA,NA  
"Ighv3-4",0.710386349253142,0,4.78471990594311,0,1,NA,NA  
"Gm29718",1.48208963071845,1.91615167427669,1.763092193093,1.0868130899696,0.277119421542161,0.42061921852943,1.65943970614285  
"Gm8023",0.553523809012177,0.781763083607634,2.28925605079194,0.341492199327023,0.73273307636037,NA,NA  
"Gm8407",7.23210562227128,1.04657283665193,0.801084912860909,1.30644432300479,0.191401501323586,0.321193430829441,1.18860506685547  
"Gm20305",0.21322377823416,2.0994305843457,4.75794260567285,0.441247563987545,0.659033782632539,NA,NA  
"Gm5539",1.24056425945953,0.403625820247897,2.49615138053045,0.161699255660577,0.871542690724136,NA,NA  
"Gm38030",0.169587515011933,2.81750627912083,4.7150516096972,0.597555766585081,0.550136386344283,NA,NA  
"Gm5851",1.82353250589605,0.274330227443936,2.15725555876319,0.127166309216149,0.898808770204403,0.938017095832867,0.0175535968781246  
"Gm17771",2.3738672150769,-1.93116320700419,1.33808311404636,-1.44323113170777,0.14895537249692,0.26658922039602,-2.55308718348179  
"Gm6525",4.01269499119097,-1.71794122254449,0.879503779822577,-1.95330737849819,0.0507831837200772,0.117821337003102,-3.67396486715815  
"Gm9124",0.177965442083287,2.88144028484446,4.7116703693154,0.611553877709643,0.540832961443682,NA,NA  
"Pcdhgb7",38.8227259440979,-1.04991955660607,0.405200271660395,-2.59111266708633,0.00956661656342118,0.0326830227307134,-3.59166930560269  
"Gm37025",0.196666782922455,1.54589180963534,4.76368444972812,0.324515997217986,0.745547412994133,NA,NA  
"Gm7115",0.0861894588756027,-0.0649347531358813,4.78471990596623,-0.0135712757302495,0.98917202100746,NA,NA  
"Gm37317",12.5476131231233,1.29588277463652,0.543929163031316,2.38244768383915,0.017197975462249,0.0512574328283293,3.84993119012093  
"Gm9517",1.41707938953735,0.870385547713905,1.22298193121046,0.711691256838465,0.476655982958815,0.614215222944344,0.42423452083698  
"Gm37486",0.0756860881509682,-0.0556381240006523,4.78471990596623,-0.0116282927933305,0.990722173799114,NA,NA  
"Gm36953",0.328615711208692,-0.0814632226597446,3.93892733843552,-0.0206815753783619,0.983499666595467,NA,NA  
"Pcdha2",0.740885822885774,4.93711277538677,4.65545681759136,1.06050017620852,0.288917109851961,NA,NA  
"Gm38100",0.239168748332626,-0.0399891329662093,4.78471990595763,-0.00

835767479647395,0.993331617947663,NA,NA  
"Gm37619",0.42421109190745,-1.0009061938562,3.79385589216652,-0.263822  
93431937,0.791916361452453,NA,NA  
"Gm38247",1.4085035478648,-2.72970716073565,1.59526840670648,-1.711127  
19919733,0.0870576341261215,0.17733490912987,-4.72161594639282  
"Gm18296",2.437095648659,2.76668757300091,1.37244949177565,2.015875694  
93827,0.0438129757292079,0.105205098616761,6.23014746628905  
"Gm8850",5.9559505629581,0.889526529086285,0.705390035620828,1.2610420  
960985,0.207293680836193,0.340358215204035,0.958693124835299  
"Ighd",121.346659068496,-1.43760339684576,0.571122624853095,-2.5171536  
449209,0.011830722512487,0.0386067661168992,-4.67843259891036  
"Rpl13-  
ps4",0.124710661020639,-0.552047854959602,4.78471990596623,-0.11537725  
6309452,0.908146105395462,NA,NA  
"Gm37988",6.0964795553944,-0.364459119626729,1.08480355613944,-0.33596  
7851104538,0.73689510986609,0.827985240736671,-0.0687952851806577  
"Gm36858",0.0897888177651089,0,4.78471990596623,0,1,NA,NA  
"Gm9442",38.4003955152057,0.600748172613548,0.47496507109646,1.2648260  
0336635,0.205933707709401,0.338929301335181,0.649987742033148  
"Pcdha4",8.02320612824558,-1.96918545533393,1.84178947420974,-1.069169  
67596356,0.28499322009231,0.429162635569961,-1.66577203708968  
"Rps2-  
ps11",1.34990806491046,-0.434991115233891,2.29531140709088,-0.18951289  
7417787,0.84969084757948,0.904277722073287,-0.0437682627491619  
"Wdr49",1.62123270806651,0.217432338418605,1.54105021146957,0.14109361  
0578242,0.887795991178151,0.930458301225091,0.0156720918290641  
"Gm5846",0.225737872401414,-0.0605980182061042,4.78471990594981,-0.012  
6649039854455,0.989895138782959,NA,NA  
"Pcdha7",0.39911196469183,-2.63084228886564,4.73597344441481,-0.555501  
908898628,0.578551404811796,NA,NA  
"Pcdhga3",25.5232813939052,-0.552087548657374,0.636225539995428,-0.867  
754458051687,0.385528766325537,0.529967576600244,-0.350542164790771  
"Gm7182",0.113058343341289,2.23400583696369,4.75316341366045,0.4700040  
04184502,0.638352156775581,NA,NA  
"Gm38080",1.8046101991538,1.91275913434389,1.67402142309534,1.14261329  
511968,0.253199183053104,0.393596242618945,1.78351334937718  
"Gm6300",1073.99644850747,2.36066236150079,1.04996005133341,2.24833540  
904993,0.0245548104618467,0.0674418501739805,6.36550134470629  
"Gm37515",1037.75457533025,0.505642326249022,0.256235203570121,1.97335  
229197204,0.048455439050214,0.113692436895436,1.09939707448812  
"Gm17967",0.0877638844306277,-0.0703622249245226,4.78471990596623,-0.0  
147056100058826,0.988267043705652,NA,NA  
"Gm37070",0.0862348898803706,-0.0629450351937307,4.78471990596623,-0.0  
131554273668647,0.989503790368979,NA,NA  
"Gm19058",1.0536995706412,2.54595867962219,1.98732468902031,1.28109850  
075745,0.200159070399089,NA,NA  
"Gm37421",0.316282961814339,-1.0791089316266,3.90155654197766,-0.27658  
4209408794,0.782099390932076,NA,NA  
"Rhbg",1694.51904403659,1.01723505804403,0.407189293127886,2.498187145  
90942,0.0124830273512032,0.0401176969332058,3.27136459529711

"Ighv8-8",8.05026428831173,-3.57899867820491,1.44535088463712,-2.47621440319211,0.0132783812103422,0.0421270647604906,-11.3349210065142  
"Gm21736",5.97387678478068,1.05538097446015,1.07220053466154,0.9843130462468,0.324961616824762,0.469884385817454,0.797096113327184  
"Gm5837",1.81499758244578,0.535072688177917,1.40354167562152,0.381230352807994,0.703032328412943,0.802747970215248,0.117563214531634  
"Gm37164",0.426035150781009,-0.04336201460357,3.09100185357179,-0.014028466063022,0.988807270635303,NA,NA  
"Gm18407",11.8555954475135,-0.657340079178897,0.686622422602667,-0.957353062673407,0.338389080975031,0.483019853201246,-0.478344746886202  
"Gm6077",0.0804673502708677,-0.544048378937456,4.78471990596623,-0.113705376621746,0.90947135024012,NA,NA  
"Gm43142",0.260189231627911,-0.0684676270228765,4.7847199059622,-0.0143096416025439,0.988582947533099,NA,NA  
"Fbxw23",4.14829783527912,1.44760585617325,0.841829971283249,1.71959410516898,0.0855062484513436,0.174998482457496,2.52314512634989  
"Gm6641",15.0863326496321,-0.424980222060887,0.519809741180924,-0.817568791795631,0.413603453713308,0.557052354056913,-0.248654249490138  
"Gm42779",0.130508431100793,-0.0715323334335,4.78471990595925,-0.0149501611043957,0.988071941609664,NA,NA  
"Gm8704",0.859965170575144,-0.781561671837383,2.02794943242298,-0.385395049472993,0.699944749807599,NA,NA  
"Fbxw27",4.81167789851983,-2.75685896065265,0.897575275029864,-3.07145153988441,0.00213020739386655,0.0104875346425084,-12.5645719148574  
"Gm6069",1.5255232943807,1.09224327860712,1.45571188064048,0.750315562531894,0.453064671864422,0.593593265153374,0.569671423408758  
"Trav7-1",0.320408413904971,2.21602808666653,4.71949010473649,0.46954820065043,0.638677840167085,NA,NA  
"Trav13n-1",0.209491758938484,-0.539171493750778,4.7847199059602,-0.112686114202661,0.910279410384925,NA,NA  
"Gm42421",4.98993633099643,0.152691238346176,0.76824214234542,0.198754051528617,0.842455140383289,0.89912212547838,0.0162366377914501  
"Gm9207",0.743784894389969,0.32742045654392,1.77296962349653,0.184673472238178,0.853485154349656,NA,NA  
"Gm2314",0.0969640591426688,-0.544048378937457,4.78471990596623,-0.113705376621746,0.90947135024012,NA,NA  
"Gm42570",0.142425137392067,2.57912268336951,4.72883040948399,0.545403928674817,0.585475739019112,NA,NA  
"Gm43712",1.8551056247834,0.477978804735169,1.30348115057452,0.366694067286278,0.713847232386274,0.810256917980416,0.100568604115287  
"Gm21168",0.941105855936328,-0.182038006710177,4.12772027617474,-0.044101342758351,0.964823622461343,NA,NA  
"Gm3203",0.154347919542544,1.36804601384224,4.78471990596623,0.285919769752117,0.774939571485582,NA,NA  
"Gm35570",3.72562237694644,-1.06241766041388,1.33234291354331,-0.797405570003318,0.425215525412794,0.568255813193877,-0.600461023469871  
"Vmn2r-ps24",0.811551182384851,-2.4009051271533,1.99610794190995,-1.20279323414546,0.229056343666292,NA,NA  
"Gm43550",0.397942387929256,1.08344853183079,3.74042177407209,0.289659

454808294,0.772076777457803,NA,NA  
"Igv4-60",0.138832188543931,-0.547965537295774,4.78471990596623,-0.11  
4524057429673,0.908822376788387,NA,NA  
"Gm19202",1.68759780469121,1.02028197975503,1.55839077225948,0.6547022  
72316292,0.512659461966168,0.646770248425516,0.444602310119632  
"Gm30023",0.209221901713043,-0.539661046424923,4.78471990595899,-0.112  
78843005059,0.910198291290382,NA,NA  
"Rps4x-  
ps",0.253951575983811,-0.0582658871546183,4.01361941374814,-0.01451704  
33835944,0.988417482042573,NA,NA  
"Gbp6",2235.49779852984,-1.08082016825802,0.553750986276009,-1.9518162  
4059322,0.0509600254055475,0.118091107125905,-2.30895489130495  
"Gm43106",1.14411907376958,-0.54718218286998,1.44825747980017,-0.37782  
1064625525,0.705563524306819,NA,NA  
"Gm43058",1.70110155961082,0.307315822593419,1.15611393785213,0.265817  
937602553,0.790379427860194,0.864998769893246,0.0445691514655503  
"Igv8-34",3.56524407046737,0.648536140196738,4.59464963227674,0.14115  
029264492,NA,NA,NA  
"Gm19843",0.113058343341289,2.23400583696369,4.75316341366045,0.470004  
004184502,0.638352156775581,NA,NA  
"Gm20121",1.46762759948762,-2.02612308196965,2.28094794485025,-0.88828  
1158079069,0.374389532348512,0.519511336889512,-1.32684042704632  
"Gm9361",11.7805670287769,1.77969263796182,0.766954707719708,2.3204664  
1092166,0.0203156599262809,0.0581580879815923,5.06249645308749  
"Gm5869",0.735053128837659,-0.785932215172265,2.26390091812256,-0.3471  
58397649325,0.728472323316187,NA,NA  
"Gm17743",1.24078432293014,-1.21128608015083,1.55563763466908,-0.77864  
2823467365,0.436190145664205,NA,NA  
"Gm6520",0.402001405909689,2.00785557340155,4.58647558974889,0.4377774  
46780542,0.661547621444549,NA,NA  
"Trdc",42.9891253645575,-1.15159839901533,0.419345146323994,-2.7461827  
3064638,0.00602931712846695,0.0229339885623973,-4.34743971236664  
"Gm43158",11.6221150040196,1.77496756349155,0.727908004204421,2.438450  
39928024,0.0147503828105012,0.0456657612002465,5.47827137155764  
"Gm6560",0.240646690285648,-1.09602327690464,4.07465880673154,-0.26898  
5289048978,0.787941003246557,NA,NA  
"Gm43215",1.76808107463755,2.15070352408418,1.68778726189752,1.2742740  
5848899,0.202566306826635,0.33460164778937,2.35462154485704  
"Gm18131",0.100532412451372,0.4.78471990596383,0,1,NA,NA  
"Gm19931",0.273737403156319,0.137203853903705,4.78269822741374,0.02868  
75415047666,0.977113792718553,NA,NA  
"Gm43060",0.133426789567973,-0.0786637671884799,4.78471990596066,-0.01  
6440621130295,0.986882873146288,NA,NA  
"Gm31274",3.84945023523594,0.550668531362851,0.910228153243019,0.60497  
8575317511,0.545193232304498,0.675095970448525,0.216357897128656  
"Gm42774",0.382635234411098,-1.52447628720615,3.2042935684232,-0.47576  
0492805385,0.63424501876026,NA,NA  
"Gm7205",0.215912658344309,0,4.78471990596165,0,1,NA,NA  
"Gm8234",21.9121686725116,0.716706200320013,0.355256427771801,2.017433  
44889002,0.0436502995792367,0.104902628098873,1.61597374663223

"Gm43561",0.284111877586945,0.818399027917167,4.78471990595855,0.17104  
4291829495,0.864188938886444,NA,NA  
"Gm3511",0.0845274898643848,-0.544048378937457,4.78471990596623,-0.113  
705376621746,0.90947135024012,NA,NA  
"Rpl9-  
ps8",5.25070696330126,0.598666875145207,0.821777288434369,0.7285025804  
08097,0.466305989652369,0.60504652866453,0.3008001217423  
"Gm42533",0.20886695961716,-1.06866979193191,4.77995937937974,-0.22357  
298610989,0.823089585559284,NA,NA  
"Gm4248",0.174190401811931,0,4.78471990595852,0,1,NA,NA  
"Gm43064",19.0694986659085,-0.621532144077298,0.660007194001394,-0.941  
705105226453,0.346343640557966,0.491020744826527,-0.442076485628497  
"Gm6740",0.435032418623231,1.78941038743505,3.0546213962806,0.58580431  
2643752,0.558007025282672,NA,NA  
"Gm43818",0.326953175802798,-0.143508915588502,3.92682144093776,-0.036  
545821537083,0.970847142789896,NA,NA  
"Gm4859",0.113058343341289,2.23400583696369,4.75316341366045,0.4700040  
04184502,0.638352156775581,NA,NA  
"Vamp9",1.1301672349934,-1.33859661062217,1.39804168678492,-0.95747975  
4198561,0.338325160434758,NA,NA  
"Trav7n-6",0.263828598748773,-2.03343369020183,4.74850380338896,-0.428  
226189636952,0.668486450633613,NA,NA  
"Gm43110",1.15359789202876,3.94607958688169,4.09101272658996,0.9645727  
96665661,0.334758830257634,NA,NA  
"Gbp10",292.881015824233,-1.55761939725171,0.762592240050775,-2.042532  
45108814,0.0410987438493915,0.10000540466435,-3.58646702284473  
"Gm43191",2.26322618689807,1.67157452067976,1.55987544300708,1.0716076  
9032773,0.283896277728848,0.427907361097486,1.41891361288013  
"Rpl21-  
ps11",0.637076974838697,3.32354360504482,2.13554975420379,1.5562941572  
7847,0.119638160155602,NA,NA  
"Gm43615",0.294019159607159,1.37304219913084,4.78471990594872,0.286963  
965732617,0.774139911511063,NA,NA  
"Gm20128",0.098511857646743,0,4.78471990596623,0,1,NA,NA  
"Gm9057",8.67055297704118,0.593689690951324,0.575564942746346,1.031490  
3616584,0.30231092575315,0.446820681499008,0.478275183012798  
"Gm19166",1.91654293725674,-0.828970033774989,1.0451794990028,-0.79313  
6523023943,0.427698285704387,0.570752253416202,-0.464886432587216  
"Gm19620",0.189571064208822,0,4.78471990595776,0,1,NA,NA  
"Gm7774",1.24779957637465,-3.12312561447045,2.3244784734074,-1.3435812  
162598,0.179083846945381,NA,NA  
"Gm43738",3.04733141577087,-0.436130362659704,1.11733140797038,-0.3903  
32142772151,0.69629095808327,0.797432076399859,-0.0987218664250265  
"Gm42927",2244.83492680785,0.530125628300125,0.312214648088832,1.69795  
245529061,0.0895167357088823,0.181302307349308,0.905236921901308  
"Gm20568",0.448358987102923,-0.918602501101124,3.7595392217016,-0.2443  
39118953348,0.806968188867922,NA,NA  
"Gm19418",2.52088667077485,1.09400031794636,1.15554487639929,0.9467397  
93745872,0.343771387536417,0.488403855594947,0.783974458671773  
"Gm5281",1.89624928778429,-1.76170339008518,1.42522365944143,-1.236089



07164482,0.21642545660335,0.351743231878979,-1.8407225246858  
"Gm21043",0.10901947455957,0.896629667781407,4.78471990596623,0.187394  
38993354,0.851351420877452,NA,NA  
"Gm42522",0.0992391121140073,0,4.78471990596623,0,1,NA,NA  
"Gm17835",0.123042686400484,-0.0612264382894653,4.78471990596623,-0.01  
27962429343293,0.989790353954939,NA,NA  
"Gm18555",0.415982995093652,0,3.13192571554667,0,1,NA,NA  
"Gm9409",0.235411276259987,2.32539794007955,4.74608648375247,0.4899611  
39149109,0.624161397996137,NA,NA  
"AU022133",0.484801595807395,-0.869935363374173,2.3268628900945,-0.373  
866190000926,0.708503871807409,NA,NA  
"Gm43802",2.7825473913166,-5.43128493398764,4.7151735091878,-1.1518738  
2254427,NA,NA,NA  
"Gm42878",13.102049822434,-5.9830414243028,3.53442955087677,-1.6927884  
2262356,0.0904957471658139,0.182828204728077,-10.166433881002  
"Gm43157",1.63736907496406,2.02543936422885,1.6542908530701,1.22435505  
248062,0.220818317394344,0.356597604435433,2.08852631425368  
"Gm42647",2.78973101833942,2.74961285230535,1.25697264010196,2.1874882  
273351,0.0287069017109997,0.0761278324574352,7.08119166311338  
"Rpl21-  
ps10",0.173491308041735,-0.555765544629218,4.78471990596082,-0.1161542  
48430894,0.907530295700884,NA,NA  
"Gm42718",209.395834492592,0.764823139294238,0.333987041628208,2.28997  
848409231,0.022022563942115,0.0620959717385813,2.12550022298523  
"Trav12-4",1.26801190805191,2.20248837333729,2.50943063204096,0.877684  
501502229,0.380114957515537,NA,NA  
"Gm43104",1.2223022600335,1.65107268760432,1.35190812054844,1.22129060  
585457,0.221976008982639,NA,NA  
"Rpl36a-  
ps2",1870.05629918529,-0.424488031916579,0.252175998100891,-1.68330069  
123688,0.0923168966785923,0.185628401040984,-0.714841431604526  
"Trav7d-5",0.434607396310041,-1.6161675803736,3.81185600141633,-0.4239  
84426424582,0.671577171030206,NA,NA  
"Gm42672",1.60382553822974,-1.16169945257745,1.5746198990493,-0.737765  
001749847,0.460657264320846,0.600033091036666,-0.593361779526231  
"Gm43471",0.172215707583243,0,4.78471990596089,0,1,NA,NA  
"Gm43247",0.564325125730668,-0.0335211685961104,2.68144716032463,-0.01  
25011482948827,0.990025786576748,NA,NA  
"Gm7285",58.0474527263549,-0.180130874177072,0.285200760043305,-0.6315  
93247331181,0.527652700167974,0.660167862779816,-0.0748013519356686  
"Gm6089",0.226055396433996,-1.09331154133895,4.77945187925817,-0.22875  
24948381,0.819061291379914,NA,NA  
"Gm43218",2.60518000341256,6.60592606403636,4.64308667622002,1.4227445  
0698265,NA,NA,NA  
"Gm5276",0.24267035266547,1.78374012829883,4.01202850682182,0.44459806  
934718,0.656610242953729,NA,NA  
"Igv4-77",0.281093155982675,-1.21555678198113,4.77607186371251,-0.254  
509734498897,0.799101784600533,NA,NA  
"Gm2505",0.784071429918947,-0.823388444282416,2.44345381592173,-0.3369  
7728965334,0.736134020124038,NA,NA

"Igkv3-11",0.186022177364981,-0.876769974513599,4.78318660259238,-0.183302481663251,0.854560687303578,NA,NA  
"Gbp5",729.221163040902,-1.00818888798927,0.37727806049248,-2.67227012000972,0.00753399749323001,0.0272494631535133,-3.63222374133857  
"Gm43743",0.112016191757249,1.35627259819833,4.78471990596623,0.283459141779051,0.776824897887418,NA,NA  
"Gm42674",1.31335960102652,-3.79452985623914,3.49568983221563,-1.08548814064379,0.277705513425009,NA,NA  
"Gm15235",0.334910552219299,1.34253137928164,4.78471990596016,0.280587245579264,0.779026999754825,NA,NA  
"Gm9480",0.616160874853618,-0.975578527402852,2.05584229517828,-0.474539574212938,0.635115184432281,NA,NA  
"Gm5279",1.69427457588183,-0.977165459634796,1.22391098554287,-0.798395856542926,0.424640807005967,0.567650508458571,-0.553319307969568  
"Trav7d-2",0.376676380542877,-2.55012246868678,4.73736712540746,-0.538299524014078,0.590370279916955,NA,NA  
"Gm7988",0.0837058623428615,-0.544048378937457,4.78471990596623,-0.113705376621746,0.90947135024012,NA,NA  
"Gm34248",58.4873685224752,0.858101310667482,0.461173393026265,1.86069127933972,0.0627877860737721,0.138135418018417,1.6986293800906  
"Iglc3",81.5431890788389,-1.59537286971825,0.854350793777449,-1.8673510709394,0.0618525778334063,0.136647590865557,-3.1753503860212  
"Gm43540",258.066573670946,0.611052953769067,0.322539389790843,1.89450644823665,0.0581578192831557,0.130505370052131,1.24431212380634  
"Gm5855",0.146368640987578,-0.552243317813368,4.78471990596623,-0.115418107781974,0.908113726941433,NA,NA  
"Gm42164",0.142425137392067,2.57912268336951,4.72883040948399,0.545403928674817,0.585475739019112,NA,NA  
"Fbxw14",0.570188224336203,1.19145377560872,4.40849836323087,0.270262950655954,0.786957966188985,NA,NA  
"Gm5987",6.09466415353599,-0.25116850106476,0.892786706762328,-0.281330914945651,0.778456600729821,0.856835833350197,-0.0388077784638013  
"Igkv2-109",15.4344308181599,-2.24866032241147,1.07346745636354,-2.09476338484354,0.0361920315046014,0.0907266945585906,-5.39656811107064  
"Gm32158",0.116779199695001,0,4.78471990596232,0,1,NA,NA  
"Gm5853",0.733991064491733,-0.534616278662647,2.21957049966576,-0.240864743310994,0.809659948497375,NA,NA  
"Gm6649",7.48669728163048,1.08694473040192,0.562515630204227,1.93229249471218,0.0533234142589974,0.12210216455924,2.28573299779633  
"Gm31306",6.49930435534497,-0.147198832396018,0.693254689227041,-0.212330092653453,0.831849520081637,0.892654640167043,-0.0167152390793488  
"Gm19211",3.21535158602642,3.19673236649989,1.46879006372469,2.17643926484179,0.0295224304755846,0.0777334990180553,8.16595367310374  
"Gm43380",0.127211944496949,1.36772633554606,4.78471990596039,0.285852957420196,0.774990745445834,NA,NA  
"Trav7d-6",0.199352306986334,0,4.78471990594876,0,1,NA,NA  
"Gm8828",0.322415116646627,-1.75189624258503,4.75619481426143,-0.368339883246997,0.712619817214043,NA,NA  
"Gm43141",0.1107056217987,-0.536982129622775,4.78471990596623,-0.112228540055854,0.910642200421266,NA,NA

"Gm43595",0.903769435444916,2.59768876773651,2.52435290223405,1.02905135230401,0.303455544486728,NA,NA  
"Gm10290",0.762189821686138,0.135776235526178,1.70245999084366,0.0797529670338354,0.936433731977143,NA,NA  
"Igv8-31",0.607226510429556,-2.09096578342854,3.02767558657195,-0.690617512887506,0.489805938891468,NA,NA  
"Gm42845",1.34672657675763,-1.00261824536238,1.71625812414189,-0.584188491963399,0.55909350317104,0.687686419683884,-0.375402659823561  
"Gm18982",0.10500178835157,-0.544048378937456,4.78471990596623,-0.113705376621746,0.90947135024012,NA,NA  
"Gm43345",0.0815935834397835,-0.0771079364763833,4.78471990596623,-0.0161154546121362,0.987142284118749,NA,NA  
"H2bc18",0.67139858457937,2.35809595310366,2.15164128145201,1.095952180055,0.273099702090949,NA,NA  
"Gm43841",0.958373388354399,0.0946792954294084,1.74165496668672,0.0543616831349345,0.956647006119324,NA,NA  
"Gm43552",0.196179373991472,-0.556524328967294,4.78471990596623,-0.116312833332907,0.907404615117268,NA,NA  
"Gm34144",1.66123653154244,1.51948067148222,1.6730606760321,0.908204163333682,0.36377036487015,0.508662835215016,1.0271231795888  
"Gm6745",16.7109782272514,0.0218389420675846,0.628016848757139,0.0347744524861147,0.972259592269614,0.983100011931387,0.000372232154958156  
"Gm42517",34.9778646322067,-1.66001772204943,0.409535779741161,-4.05341316721731,5.04757405388752e-05,0.000582697447618111,-12.3635504814256  
"Gm43518",3.48174454482291,1.45102188374164,1.48912765523308,0.974410675030089,0.329852671199046,0.474471957435559,1.08181337295162  
"Gm6204",0.898920929953623,1.36422082413705,2.09514032860145,0.651135776212038,0.514958843865954,NA,NA  
"Wdr46-ps",1.69910994737946,1.04997240409691,1.54092478063562,0.681391082349782,0.495624064044377,0.631527818300923,0.48258126791918  
"Gm7646",0.224661994584219,0,4.78471990595984,0,1,NA,NA  
"Iglc1",350.66584319638,-1.88328045466612,1.04741775352686,-1.79802227747692,0.0721734775426836,0.153528089147637,-3.52902601779613  
"Gm9256",0.0791558105820263,-0.0622988722526321,4.78471990596623,-0.0130203801846268,0.989611533202381,NA,NA  
"Gm5075",0.894734365484022,-0.392494966587645,1.9510458139296,-0.201171578742747,0.840564414056236,NA,NA  
"Gm43089",0.1504304828486,1.37422470110327,4.78471990596623,0.287211107047187,0.773950682247427,NA,NA  
"Trav15d-2-dv6d-2",0.291936547270792,-1.63081847950684,3.89982727304521,-0.418177105119172,0.675817633775025,NA,NA  
"Igv12-40",0.107871887828551,-0.515062155756823,4.78471990596623,-0.107647295114302,0.914275478864407,NA,NA  
"Gm42525",0.0967031493650343,-0.544048378937456,4.78471990596623,-0.113705376621746,0.90947135024012,NA,NA  
"Tex13c2",1.72308278609572,-3.26236237978862,1.6276162463414,-2.00438057012631,0.0450293090391014,0.107192601934033,-7.28527292174598  
"Gm17951",1.83935929852926,0.324288562326911,1.18116847348722,0.274548

948440435,0.783662792701854,0.860255440384008,0.0488138309906471  
"Gm8493",0.626727437285651,-0.537209454917458,2.65595943787458,-0.2022  
65684956152,0.839709024948852,NA,NA  
"Gm8848",0.278543486657859,-1.08597652337017,4.77982592688479,-0.22720  
0015226904,0.820268215854806,NA,NA  
"Gm4332",1646.59881294181,0.143657502544206,0.310128317958472,0.463219  
558568148,0.643206998266136,0.756317093968949,0.0401227581412899  
"Gm4962",17.941339034008,1.04333906512215,0.653011557743523,1.59773445  
469695,0.110102087338285,0.211880230845034,1.61898481856485  
"Iglc4",0.490152431675242,-0.855705351065379,4.61301675875151,-0.18549  
7993139086,0.852838454195223,NA,NA  
"Gm43013",0.234553579509203,1.52936463282701,4.73099154112102,0.323265  
137875226,0.746494453729499,NA,NA  
"Gm9364",0.118461932160802,0,4.78471990596581,0,1,NA,NA  
"Gm7902",1.79766281290757,1.5099584649589,1.91743346330307,0.787489367  
353467,0.430995450248633,0.57330895304314,0.840035981777285  
"Gm9419",4.33459141490091,0.321607840745788,0.783886545531433,0.410273  
454212375,0.681605362810526,0.785782614798063,0.0775316411817194  
"B230207021Rik",0.173046084801342,-0.552778099292975,4.78471990596623,  
-0.115529876389148,0.908025141081344,NA,NA  
"Gm43493",3.5437922732058,1.133048104592,1.89994841835926,0.5963572977  
26256,0.550936561083847,0.68095341098666,0.435386637138424  
"Gm5717",133.104769111586,1.38410273988409,0.596868519518051,2.3189407  
6270214,0.0203982485024244,0.0583431200381797,3.93280867515882  
"Gm18830",0.383792615899991,-0.76245506816115,4.75756639779092,-0.1602  
61571654613,0.872675028933092,NA,NA  
"Gm19210",31.451428245273,2.26055348778195,0.779118899666902,2.9014229  
9044268,0.00371472071950055,0.0158906591901759,9.36326638079916  
"Gm3724",0.0968369415957739,-0.0749937486661116,4.78471990596623,-0.01  
56735922143738,0.987494794769825,NA,NA  
"Gm17937",0.139896150021884,0,4.78471990596454,0,1,NA,NA  
"Gm43730",0.266852962315317,-0.571811066221992,3.96150338440594,-0.144  
341935557311,0.885230465224623,NA,NA  
"Gm20768",14.4640242479275,1.16475445615223,0.492066935769816,2.367065  
07079169,0.0179297801003,0.0528248492589376,3.4252791191175  
"Gm21009",0.0796967941715038,-0.0620151063511602,4.78471990596623,-0.0  
12961073494361,0.98965884910223,NA,NA  
"Gm4734",12.5479799408116,0.140209206446901,0.463108229428659,0.302756  
888211377,0.76207514051346,0.84576784668703,0.023486496040005  
"Gm43368",0.0949500915947116,2.04836625511614,4.7634299069052,0.430019  
186835683,0.667181684222319,NA,NA  
"Gm43564",0.506731990845378,0.65126157276555,2.96177605409941,0.219888  
864272549,0.82595770910153,NA,NA  
"Gm5050",0.554475062691622,-2.88003909015989,4.40250979227492,-0.65418  
1188923985,0.512995079339911,NA,NA  
"Gm18867",1.18597691910456,0.63758970070705,1.52201526221265,0.4189115  
02753359,0.675280810158601,NA,NA  
"Gm43720",2.92694996205311,0.455942005580222,2.03161997770553,0.224422  
879565869,0.822428269368576,0.886146463093971,0.055111093454294  
"Rpl7a-

ps7",0.353890302602695,2.07140660554388,3.77440569159876,0.54880338119  
3099,0.583140389656312,NA,NA  
"Gm18492",20.2064374115689,1.17701977432254,0.445217090597043,2.643698  
54433067,0.0082005655269529,0.0290084591154804,4.16684750253962  
"Gm2287",0.250747336955208,-0.536119345724961,4.07226986747355,-0.1316  
51232156078,0.895260160756444,NA,NA  
"Gm8539",0.454317861270212,0,3.57593312004562,0,1,NA,NA  
"Gm42932",0.71058949390751,-1.97115766709177,1.73606343753341,-1.13541  
799480115,0.256200223512778,NA,NA  
"Gm7652",24.7692593980089,1.88254410982704,0.660176967919957,2.8515749  
5839098,0.00435032278938485,0.0178692544059205,7.57662571879326  
"Gm9402",8.160823447344,0.301748960105005,0.692786564731207,0.43555833  
1334096,0.663157208610679,0.771518060641837,0.0782722311553802  
"Gm43467",1.10443654564596,1.00113158581921,1.70787153276509,0.5861867  
04686359,0.557750055205432,NA,NA  
"Gm43432",0.41839464207805,2.16315104723534,4.62311761002658,0.4678987  
70851927,0.639856982523212,NA,NA  
"Gm43369",2.15464270423678,2.03390976060273,1.21758118749821,1.6704510  
3972232,0.0948301585756692,0.189601972098892,3.38204268486412  
"Gm4869",9.62269688480912,-2.4577476899084,0.826965800194728,-2.972006  
44733999,0.00295860471056166,0.0133937484668055,-10.6001852049256  
"Gm43355",0.554968842756323,-1.24468667832513,2.48689696058999,-0.5004  
97888754441,0.616724542366087,NA,NA  
"Gm6522",0.10500178835157,-0.544048378937456,4.78471990596623,-0.11370  
5376621746,0.90947135024012,NA,NA  
"Lhfp13",3.87853926246943,0.108976710970406,0.904825842505107,0.120439  
432486468,0.904135056123269,0.941409020842224,0.00657974874346228  
"Igv4-73",0.24378380534512,-0.0536791813157258,4.7847199059596,-0.011  
2188764171683,0.991048819488266,NA,NA  
"Gm21049",1.23483481019011,3.99549629673899,1.44904501188497,2.7573306  
998528,0.00582753817763932,NA,NA  
"Gm5857",16.7539025744213,-0.045809446617739,0.618573925823121,-0.0740  
565431314964,0.940965393820327,0.963448156735216,-0.00170578803094769  
"Gm42628",0.786528547725587,2.10050664157918,2.81396837744829,0.746457  
088293195,0.455391344419217,NA,NA  
"Gm5550",0.0880443523232676,1.38341317908649,4.78471990596623,0.289131  
486539361,0.772480759308394,NA,NA  
"Gm9645",1.50868996456253,-0.828190062755249,1.4846109407169,-0.557849  
898610694,0.576946885883824,0.702204143630637,-0.292790955770056  
"Gm21190",2.36540795194936,1.84603958000314,1.30045186436347,1.4195370  
3215822,0.15574250838438,0.276010491590496,2.37643702819336  
"Gm42957",13.9903771619198,-0.926284461838402,0.450057273905383,-2.058  
1479637037,0.0395759319884601,0.0971027284100131,-2.16008221650051  
"Gm9273",0.53838082989191,0.608379680470037,2.61489103368721,0.2326596  
68273891,0.816025689847926,NA,NA  
"Gm43245",0.0909456162106575,-0.0532788491267022,4.78471990596623,-0.0  
111352075301768,0.991115573431606,NA,NA  
"Gm43725",0.547517904108494,-0.416809862280809,2.30344456878309,-0.180  
950680528427,0.856406288089501,NA,NA  
"Gm17833",2.96372781708588,0.951647596245217,1.13538992349325,0.838168

083540223,0.401936309515294,0.545887066875355,0.576073364883385  
"Gm9771",0.0807549073994291,-0.0682448448260521,4.78471990596623,-0.01  
42630804241969,0.98862009418742,NA,NA  
"Gm9403",43.0320908244874,1.02517860060217,0.427025779439245,2.4007417  
1153881,0.0163618808397351,0.0493463190430247,3.08465179723707  
"Gm43671",1.94521219500833,2.7023897140137,1.00376542759374,2.69225223  
316562,0.00709712472654134,0.0260395700113407,9.85869053731978  
"Gm18451",1.67996469113587,-2.44135642612094,1.61368191569627,-1.51291  
056953287,0.130302376757274,0.240476643825208,-3.47925592119705  
"Gm6366",0.087583724926668,0,4.78471990595887,0,1,NA,NA  
"Gm43582",3.73916547631411,-2.8261615614533,1.10977348400006,-2.546611  
1798479,0.0108774555560472,0.0361740795551438,-9.3811958756646  
"Gm42814",14.8695735503343,-0.607218152091954,0.87193204790749,-0.6964  
05360428246,0.486175007001482,0.62312068144054,-0.287223335974203  
"Gm2451",2.0759463868358,0.963685054775732,2.25851464784149,0.42668975  
1911393,0.669605315859247,0.776320632881409,0.243995088893117  
"Gm43103",0.607540925876878,2.12327339507861,2.15478473230677,0.985376  
108919043,0.324439360474683,NA,NA  
"Gm9353",2.46467561930217,0.614476652775633,0.875981364456512,0.701472  
288918926,0.483008322400081,0.62060601450786,0.293141516460862  
"Trav7-5",0.754514036612859,0.536730354163364,2.11204510232071,0.25412  
8263441725,0.799396468880859,NA,NA  
"Gm5554",0.362534341200603,-0.0683082677884839,3.78319993505462,-0.018  
0556853883266,0.98559443011949,NA,NA  
"Gm21680",0.0799686635045908,0,4.78471990596046,0,1,NA,NA  
"Gm42669",617.267958865907,0.5236622393645,0.320304196880165,1.6348903  
4631793,0.102072036553565,0.200483587057661,0.841537208244935  
"Gm17936",0.343543258948504,-0.0207108949671104,3.84909623355503,-0.00  
538071633194315,0.995706830228745,NA,NA  
"Gm43587",4.76980940602058,0.469469324072096,1.53527823458529,0.305787  
780674757,0.759766232729788,0.844483069533999,0.0793546772349627  
"Vmn2r-  
ps26",0.35594771629654,0.434878435156918,3.8641693638359,0.11254124605  
067,0.91039426783078,NA,NA  
"Gm2602",12.3550290700363,1.22327530283035,0.755389486783091,1.6193967  
8038121,0.105361919137914,0.205065551941611,1.9381886877789  
"Tmem265",204.452747429494,0.2763202066063,0.252855270688341,1.0927998  
68692,0.27448167930511,0.417753788392088,0.24118969637662  
"Gm42573",0.746188793961608,-0.398096372987989,1.83164690400162,-0.217  
343403970636,0.827940733953708,NA,NA  
"Gm43498",329.195870752399,0.756834275423187,0.367647933618545,2.05858  
433086814,0.0395340750706187,0.0970336600864708,1.7654653082696  
"Gm7697",0.157502682527355,-1.19648096621745,4.77621924155054,-0.25050  
7965758505,0.802194545266423,NA,NA  
"Ube2n-  
ps1",298.285019114001,-0.797635138843883,0.419610794097902,-1.90089280  
367221,0.0573160548849061,0.129110334867574,-1.63282926617878  
"Gm7492",0.21563029940323,0.875686514634689,4.78471990596623,0.1830172  
99203401,0.854784445067753,NA,NA  
"Gtf3c2",5469.11652874881,-0.0457879445569089,0.167297553621372,-0.273

691656367769,0.784321590277089,0.860687886493847,-0.00686926044020791  
"Gm19798",0.576616697150753,-2.42285581959904,3.71662076424087,-0.6518  
97509401638,0.514467291727121,NA,NA  
"Gm7463",4.31235371289327,2.23148305479163,1.08751278771789,2.05191431  
309449,0.0401779905920952,0.0981938406323229,5.17885217889401  
"Gm42791",0.807165181882939,0.522642877594034,3.28766587950712,0.15897  
0800789643,0.873691878843948,NA,NA  
"Gm3089",0.133037321563943,-1.09148944917188,4.7792627781536,-0.228380  
296258487,0.819350606036027,NA,NA  
"Gm7832",1.2824071738654,-0.042575355613698,1.42614704217567,-0.029853  
4122741977,0.976183960891438,NA,NA  
"Mrpl33",2905.14655294094,0.0803769949743513,0.216807980338086,0.37072  
8950332055,0.710839425243598,0.807944418794408,0.0171413596223655  
"Gm42857",471.898669297701,0.385761262449521,0.290007167973145,1.33017  
837160923,0.183459508495155,0.31159351016015,0.449819154668142  
"Gm20072",0.25288859075912,-0.542164074896627,3.32058750209622,-0.1632  
73539563216,0.870303066689205,NA,NA  
"Rpl7-  
ps7",1.11036760902697,1.12004696765025,1.25856797771327,0.889937601690  
216,0.373499392076859,NA,NA  
"Gm6450",1.29990138053596,0.414776449179367,1.4226177626959,0.29155860  
4184271,0.770624129897978,NA,NA  
"Gm42785",1254.03277840269,0.583584080969826,0.281089108724296,2.07615  
330105952,0.0378797747836519,0.0940451061651094,1.37958153866224  
"Gm42960",0.226116686682577,3.23176147523835,4.69583055471318,0.688219  
354932782,0.491314657303822,NA,NA  
"Gm19617",0.0937140449795573,-0.0606233253802277,4.78471990596623,-0.0  
12670193150624,0.989890918978306,NA,NA  
"Gm8675",0.188231342398726,0,4.78471990595981,0,1,NA,NA  
"Tsg101-  
ps",0.29682155987906,0.415829342513411,3.93241625127264,0.105743979259  
275,0.91578548553827,NA,NA  
"0610012G03Rik",2442.68635371657,0.6175822556246,0.214381300400939,2.8  
8076550739075,0.00396710665534141,0.0167065629709093,2.52711796167584  
"Gm43105",0.235889724214809,-0.553972143183098,4.78471990596184,-0.115  
779429950087,0.90782735338581,NA,NA  
"Gm42906",0.434463809435274,-2.7539796416545,4.73396147863561,-0.58174  
9482771083,0.560735435753046,NA,NA  
"Gm6051",0.11996957794937,-0.528366241780401,4.78471990596623,-0.11042  
7831130003,0.912070082048703,NA,NA  
"Gm42715",4083.8377016715,0.0708009869840126,0.260057965623504,0.27225  
0791527432,0.785429190196575,0.861236591809454,0.0105766780163171  
"Gm7504",0.169587515011933,2.81750627912083,4.7150516096972,0.59755576  
658508,0.550136386344283,NA,NA  
"Ybx1-  
ps2",0.617885752920838,1.27194264646286,2.00492323215345,0.63440965023  
7178,0.5258135133307,NA,NA  
"Gm29793",3.45189208644946,-2.67190689184473,1.20612973623914,-2.21527  
320947751,0.0267413175471236,0.0721364429349497,-7.02496667869191  
"Gm43580",0.765151536807768,-2.01234906489107,3.727343967343,-0.539888

210619196,0.589274128739962,NA,NA  
"Gm43155",0.455312036401162,0.85799053760398,2.69657907514662,0.318177  
406889998,0.750350369623217,NA,NA  
"Gm4482",2.77772696239799,-0.929417005832537,0.903102731047161,-1.0291  
376317231,0.303415004776255,0.448078903516429,-0.746122902964064  
"Gm42581",0.185691574578253,-1.52158235800743,4.76388336880362,-0.3193  
99582275993,0.749423527545629,NA,NA  
"Gm42742",2724.46914746436,0.176850408291796,0.285147178501435,0.62020  
7463462263,0.535121208434554,0.666951759272368,0.071631057967581  
"Gm42420",53.9159051391387,1.44094377710841,0.83663992058202,1.7222986  
1576052,0.0850154383446198,0.174251789063012,2.51769472382354  
"Gm35648",0.211765759245523,-0.540473776581858,4.78471990596623,-0.112  
958289555868,0.910063623611689,NA,NA  
"Gm36378",0.113042065690103,-0.0704275380794306,4.78471990596623,-0.01  
47192603670723,0.9882561534719,NA,NA  
"Gm42883",0.856031585725331,-0.0698567322749336,2.7720586947503,-0.025  
2003077738677,0.979895191467182,NA,NA  
"Gm7993",0.679267176158189,0.410095367558156,2.54734078763062,0.160989  
597288866,0.872101593930162,NA,NA  
"Gm43442",0.208500357250766,1.82761418268611,4.74686743183853,0.385014  
793214533,0.700226455425157,NA,NA  
"Gm7041",0.0837058623428615,-0.544048378937457,4.78471990596623,-0.113  
705376621746,0.90947135024012,NA,NA  
"Gm3170",0.0969555270020665,-0.544048378937457,4.78471990596623,-0.113  
705376621746,0.90947135024012,NA,NA  
"Gm18593",0.0808139482376983,-0.0656697356314205,4.78471990596623,-0.0  
137248860794411,0.989049469095992,NA,NA  
"Gm34653",3.11607840473938,0.602871806277691,0.978702807261324,0.61599  
0678482562,0.537900671989658,0.669218179074422,0.242140533961558  
"Gm9794",56.1964489546312,-0.275706793305695,0.620479676231392,-0.4443  
44599617276,0.656793460764679,0.766331093171547,-0.0733768723341459  
"Gm42642",1.74348583933402,-1.44865815750959,1.514896367084,-0.9562754  
18560864,0.338933105570404,0.483502904039489,-1.05273692464207  
"Gm7542",3.06890302067874,-0.708418131491181,1.15440013234148,-0.61366  
7749720617,0.539434903810258,0.670314304664611,-0.283373320308125  
"Gm5864",0.698004632507071,0.530129561120094,2.03592015541499,0.260388  
188461171,0.79456435304719,NA,NA  
"Gm42758",0.365189865784144,0.358667803927665,3.81090852621554,0.09411  
60884498698,0.925016940374329,NA,NA  
"Gm5767",1.78918501013062,1.20538546533813,1.17873251891248,1.02261153  
060429,0.306491555593839,0.450914687313715,0.960061944835252  
"Gm43028",0.779952162310569,-0.409372113246771,2.23867505568421,-0.182  
863570220848,0.85490506761715,NA,NA  
"Trmt112-  
ps1",0.0798945411407854,-0.0623842782326532,4.78471990596623,-0.013038  
2299191357,0.989597292383634,NA,NA  
"Gm18753",0.306846472955244,-1.39354728173644,3.93628566589885,-0.3540  
25952386823,0.723319433963855,NA,NA  
"Gm34583",2.61578283503675,-2.37729926116131,1.37643911203196,-1.72713  
724884774,0.0841430173141619,0.172842451705808,-4.17305117513931



"Gm9495",0.110076717202013,-0.0603457276235208,4.78471990596623,-0.012  
6121755942858,0.98993720659224,NA,NA  
"Mpv17",3268.25758154461,0.539241041326274,0.1442422719487,3.738439737  
81871,0.000185165864094661,0.00159468375358556,3.47329459804013  
"Gm42935",1.51944687175358,0.297876575457804,1.40641173303799,0.211798  
983512716,0.832263861572182,0.892673419561928,0.0338192610774275  
"Gm7452",0.0837058623428615,-0.544048378937457,4.78471990596623,-0.113  
705376621746,0.90947135024012,NA,NA  
"Gm43596",0.110944110409665,0,4.78471990596502,0,1,NA,NA  
"Gstm2-ps1",0.0842895237925654,0,4.78471990595952,0,1,NA,NA  
"Gm4366",1.70747878507875,-1.99931737642118,1.56000880065855,-1.281606  
47271809,0.199980728443336,0.331425775026618,-2.20794894535924  
"Gm44331",0.513638200993218,-1.48242398993195,2.99642754798895,-0.4947  
30463590509,0.620790394735218,NA,NA  
"Gm19040",44.3823764928321,-0.50949811825162,0.362512665260299,-1.4054  
6294537262,0.159883660514181,0.281202562935731,-0.646390075112353  
"Olfr1383",5.48724686433962,-1.1579907519269,0.877356996688917,-1.3198  
6267425583,0.186880871649592,0.31567211603775,-1.33522263948227  
"Gm4782",0.214514367998659,-0.0607010636901592,4.78471990596358,-0.012  
6864403524442,0.989877956628642,NA,NA  
"Gm31532",3.69128943440403,1.16208518735896,0.956207365126138,1.215306  
66855474,0.224249149465007,0.360432768631499,1.18584963703436  
"Gm7468",2.09225378613154,4.75838435332102,1.47275987838676,3.23093018  
974232,0.00123388072000351,0.0069073230774127,23.6737859036192  
"Gm44054",0.100301575765887,0.866279267705656,4.78471990596623,0.18105  
1197296933,0.85632739035283,NA,NA  
"Gm7384",0.411120679042771,0.0148701169052129,4.62993763850421,0.00321  
173157529115,0.99743741336824,NA,NA  
"Gm44150",0.229620943444323,0,4.78471990595749,0,1,NA,NA  
"Gm3375",0.485635508707789,1.32565737823554,2.69947999146532,0.4910787  
93851684,0.623370719492447,NA,NA  
"Zfp862-  
ps",712.99038917394,-0.41183358648638,0.190797850231689,-2.15848127212  
274,0.0308904329385086,0.0804463284940618,-1.03788860848482  
"Gm45234",1.08806470966785,2.27087133487373,4.21569232301421,0.5386710  
32152096,0.590113865175935,NA,NA  
"Etfl",21.4513072398547,0.568202187574217,0.665730201594221,0.8535021  
93852023,0.393380871572276,0.537915718768233,0.352315691279452  
"Trbv4",3.28517076334933,-3.0943357259875,1.33494106340566,-2.31795680  
784088,0.0204516685694401,0.058470180904244,-8.78555676259343  
"Gm17893",59.8078663861395,0.414099960176683,0.377504757908315,1.09693  
971135923,0.272667747704218,0.415349667557566,0.363842528474587  
"Ccfdc142",68.9702836934591,-0.564142703532503,0.400750973113413,-1.407  
71387066065,0.159215812897398,0.280331399663488,-0.717466990174527  
"Gm35549",0.175097325060631,0,4.78471990596485,0,1,NA,NA  
"Gm44083",0.716852566936954,1.94587724770202,2.99674650057634,0.649329  
947437258,0.516125132760874,NA,NA  
"Gm44790",2.33828392901897,1.13690199702921,1.51188266676112,0.7519776  
64685298,0.452064490709703,0.592641258647065,0.594788496519365  
"Gm34701",0.113058343341289,2.23400583696369,4.75316341366045,0.470004

004184502,0.638352156775581,NA,NA  
"Gm44332",0.10558780894576,0.814298562521403,4.78471990596623,0.170187  
300097969,0.864862839075922,NA,NA  
"Gm18840",0.520898658858646,-2.52434754922978,3.69680797870652,-0.6828  
45190707748,0.49470467055357,NA,NA  
"Gm32536",0.424840632663227,-1.24282052199359,3.80155099369721,-0.3269  
24595791066,0.743724917615957,NA,NA  
"Gm18716",333.747124065102,0.52271860954454,0.388969031885142,1.343856  
62275267,0.178994755212565,0.306197555460133,0.618650426978827  
"Gm45021",0.159724521250827,-0.567461986658591,4.78471990596145,-0.118  
59878902244,0.90559322480161,NA,NA  
"Gm6794",0.0778527997966676,0,4.78471990596551,0,1,NA,NA  
"Gm44041",28.3850157311344,1.07800803761371,0.632861114296539,1.703388  
01557112,0.0884954789813061,0.179750804084129,1.8500599401719  
"Gm44163",0.14728986473751,0,4.7847199059615,0,1,NA,NA  
"Gm7825",0.0837058623428615,-0.544048378937457,4.78471990596623,-0.113  
705376621746,0.90947135024012,NA,NA  
"Gm44233",0.0721532113593249,-0.544048378937457,4.78471990596623,-0.11  
3705376621746,0.90947135024012,NA,NA  
"Tas2r141-  
ps4",0.366791072991917,-0.055165399540149,3.85250135757083,-0.01431937  
18625795,0.988575184704207,NA,NA  
"Gm6342",0.222265746865732,3.19052280584978,4.69750997731396,0.6791944  
71381224,0.497014649864957,NA,NA  
"Gm31520",3.08241184217435,-0.98437447859993,1.19273726633175,-0.82530  
7053268625,0.409197288468978,0.552811777569486,-0.583475865817538  
"Gm44958",1.59943709442344,2.61289835149886,1.87037548969369,1.3969913  
3457249,0.162416176950161,0.284534413759746,3.28415473506068  
"Gm45062",409.232547186364,-0.350936482889779,1.48096337287161,-0.2369  
64998134497,0.812683944401236,0.880701914201943,-0.0445815879816521  
"Gm19131",0.406217573999285,1.38027648242432,3.6683789925312,0.3762633  
26454151,0.706721140669248,NA,NA  
"Gm16042",1.51766843330534,-0.380347327019749,1.93498864905273,-0.1965  
63079171523,0.844169465430866,0.900170425866614,-0.0400015739635716  
"Gm8774",0.231664434632475,-1.19426401488557,4.77624828444155,-0.25004  
2280837,0.802554651503731,NA,NA  
"Gm18765",0.253616951546309,-1.96584132651058,4.75012821687709,-0.4138  
501608285,0.678983845763992,NA,NA  
"Gm2011",234.913887339462,0.57204692317972,0.26902890162051,2.12634003  
162472,0.0334749571001621,0.0854983905605136,1.40681081607648  
"Gm5881",4.45552810696391,0.375010423314755,1.02189792063149,0.3669744  
46021981,0.713638079337387,0.810066674676624,0.0789917156615732  
"Olfr766-ps1",0.087583724926668,0,4.78471990595887,0,1,NA,NA  
"Gm6749",0.17818221625663,2.88296522399643,4.71167037036318,0.61187752  
9067087,0.540618789862949,NA,NA  
"Mageb16-  
ps2",0.200943503360335,-0.550322841045802,4.78471990596575,-0.11501673  
07306,0.908431860845826,NA,NA  
"Gm19253",0.622418558530472,-2.0561048331709,2.30141317077838,-0.89340  
969247842,0.371637814024813,NA,NA

"Gm44126",71.7955690192863,-0.908658124888305,0.839202927050278,-1.08276329311929,0.278913502298559,0.422651392540398,-0.782543256448882  
"Gm8956",168.649955168736,0.763817071150866,0.405287812372552,1.88462876956375,0.0594799753060995,0.132723799326886,1.54251712318475  
"Gm5311",0.0886915477092957,-0.544048378937457,4.78471990596623,-0.113705376621746,0.90947135024012,NA,NA  
"Gm6266",5.20409731188803,1.54147953386,0.714962849264031,2.15602745715637,0.0310815212316029,0.0807928944105843,3.87815634630475  
"Gm44965",0.19995262244921,1.46535453224647,4.76555321949552,0.30748886115715,0.758471300145617,NA,NA  
"Gm35876",2.97285504857081,-3.64196671274762,1.77384007234214,-2.0531539283239,0.0400576510810937,0.0980226004993932,-8.45867604566554  
"Gm8038",1.25290129489159,1.14944490527922,1.51527883945605,0.758569891790907,0.448109889068945,NA,NA  
"Olfr1358",0.676341451412584,-1.89663080272152,2.33921714327739,-0.810797239654385,0.41748211994541,NA,NA  
"Gm18688",0.0824094759492393,-0.068311865408698,4.78471990596623,-0.0142770876354784,0.988608919187669,NA,NA  
"Gm8686",0.148177164577155,2.59891947282789,4.7275994170606,0.549733436265582,0.582502219767124,NA,NA  
"Gm44212",2.68449554797243,1.50786997157402,1.03175831503138,1.46145657331403,0.143890184897337,0.259630837046851,2.03335438514363  
"Gm35736",0.119297757152834,-0.0659636322839385,4.78471990596549,-0.0137863100829991,0.989000464468359,NA,NA  
"Gm18584",1.42303886694544,-0.701826213360737,2.07977403618271,-0.337453108439076,0.735775355171357,0.827344168115981,-0.133020284605664  
"Gm7838",0.590658561948887,3.58265188062273,2.8173248177906,1.27165027546675,0.203497405206614,NA,NA  
"Gm44389",0.2507495523686,1.42098149553414,3.99139299449411,0.356011421950759,0.721832011380935,NA,NA  
"Gm29848",0.101553610365515,0,4.78471990596623,0,1,NA,NA  
"Gm19065",1003.30063594233,0.936964940277284,0.384900248816879,2.43430588355649,0.0149203803873232,0.0460231693468739,2.88454994196556  
"Gm43951",289.335565563758,-0.124534784252289,1.07696234858262,-0.115635225703283,0.907941644088803,0.943458014093129,-0.00724834977086279  
"Gm5051",0.791755881806127,-1.19226849596241,2.40276104822893,-0.496207684422562,0.619747889930637,NA,NA  
"Gm44524",1.94768850923959,-0.895405629725378,1.59149413280958,-0.562619497782662,0.573694012223683,0.699642597594282,-0.319826041143429  
"Gm7565",0.703893727560145,0.345767037758732,2.24589421626981,0.153955175294504,0.87764507905143,NA,NA  
"Gm45140",451.720018069955,-0.542128619828919,0.27905362363185,-1.94273993927467,0.052047587973915,0.119927188645166,-1.14978458704983  
"Gm44411",7.13299724495007,1.68349962834642,0.922584539940642,1.8247646209796,0.0680365568734793,0.146861767704592,3.22939587310221  
"Gm6210",3.90885532968246,-0.046323474920645,0.927402870956092,-0.0499496781510807,0.960162489242583,0.975827376348808,-0.00113351582291456  
"Gm6352",0.096952413306212,0,4.78471990596623,0,1,NA,NA  
"Gm44259",0.997163518716193,-1.07900864135602,2.59064260911836,-0.416502313965733,0.677042474490365,NA,NA

"Gm5306",0.100532412451372,0,4.78471990596383,0,1,NA,NA  
"Gm44223",0.136932838913104,1.39340637622592,4.78471990596623,0.291220  
05124865,0.770883028176073,NA,NA  
"Gm44487",0.36112186439203,0,4.76838424633349,0,1,NA,NA  
"Gm44208",0.125028765749928,-0.0453167553986293,4.78471990596544,-0.00  
947114069146028,0.992443236046038,NA,NA  
"Gm44596",0.236951965049875,-1.17566544312466,4.77680911328681,-0.2461  
19410519151,0.805589797727191,NA,NA  
"Gm44245",12.6522216931784,-1.84038028952159,0.591173498204274,-3.1130  
9673913302,0.00185135322720454,0.00940778869534378,-8.58761443421759  
"Gm43941",0.833392555723196,-0.465405752547163,2.17509958763119,-0.213  
969859216431,0.830570561707612,NA,NA  
"Gm5314",0.693231764985026,0.0465790077068165,2.23972634391175,0.02079  
6740563164,0.983407797831706,NA,NA  
"Gm6637",4.01677999435601,-4.3863901380601,1.4685197635086,-2.98694661  
594481,0.00281778922086297,0.0129000362123471,-19.083100659223  
"Minpp1-  
ps",0.370047044869597,1.07684383641042,3.78440410260542,0.284547793315  
479,0.775990613193286,NA,NA  
"Gm5340",0.67311546996267,-0.598581936837787,3.13812388492392,-0.19074  
5158186226,0.848725257064162,NA,NA  
"Gm5886",1.18001288154464,2.58466608240103,2.31877881396003,1.11466693  
883877,0.264993173597331,NA,NA  
"Gm18485",0.428429892230314,-1.47835931387806,2.37871126931873,-0.6214  
95905344354,0.534273387779435,NA,NA  
"Gm44803",0.194764910534866,1.37945751926683,4.7847199059615,0.2883047  
58978285,0.773113464609343,NA,NA  
"Gm7498",2.39472367928594,1.63825654817896,1.18511359541058,1.38236246  
257169,0.166860435811152,0.290097617248849,2.0274044068273  
"Gm20589",58.0892139628134,0.542495576827691,0.490219119136632,1.10663  
896133453,0.268450055212917,0.410689617618003,0.482776328139795  
"Gm43899",0.325975336401582,0,4.78471990595507,0,1,NA,NA  
"Gm19653",0.0826501636948005,0,4.78471990596623,0,1,NA,NA  
"Gm29803",4.97001143031345,1.05560537979692,0.781177400909266,1.351300  
45821631,0.176599205318989,0.302992075985293,1.2604441530053  
"Gm19252",0.360222011450465,0,4.72306307982545,0,1,NA,NA  
"Gm44132",0.0804673502708677,-0.544048378937456,4.78471990596623,-0.11  
3705376621746,0.90947135024012,NA,NA  
"Olfr1372-  
ps1",1000.35512661034,-0.788851562619707,0.381325754931955,-2.06870779  
751153,0.0385735150578821,0.095348239825753,-1.8539742519044  
"Gm3549",0.0886915477092956,-0.544048378937457,4.78471990596623,-0.113  
705376621746,0.90947135024012,NA,NA  
"Gm4045",24.7323033723832,1.27356641912151,0.51032399085532,2.49560365  
952416,0.0125743009754529,0.0403246250689771,4.0891580833688  
"Gm44248",0.435732795912902,3.17355293791403,3.62019078011847,0.876625  
882631018,0.380689876081837,NA,NA  
"Gm43960",240.628194541545,0.707221059094436,0.361526383951113,1.95620  
87042313,0.0504405735749776,0.117207758737327,1.51614560074136  
"Gm44112",0.451055362156804,-1.52396743320123,3.10840756986972,-0.4902

72719695219,0.623940928527334,NA,NA  
"Olfr318",54.2873640275487,0.961276437063958,0.465926382976492,2.06315  
090148578,0.0390982932993612,0.0963156693305047,2.24950631065336  
"Gm8703",1.13541602821857,-0.593425859742351,1.54754085838133,-0.38346  
3775142617,0.701375924525695,NA,NA  
"Gm44050",0.421929389745933,2.02951081188506,4.61651357043537,0.439619  
808524393,0.660212491538259,NA,NA  
"Gm44429",0.878640226183773,0.151363172550615,4.18431993637386,0.03617  
39003833886,0.971143696841669,NA,NA  
"Gm4607",1.35773455317162,0.306943721114566,1.65660382249261,0.1852849  
28687852,0.853005558526667,0.906427978408292,0.0301552875070759  
"Gm19078",0.295313763320152,-1.94587725462273,4.7505333315057,-0.40961  
2377986616,0.682090315426445,NA,NA  
"Prkc2",8.60509889863034,-0.0725260257523553,0.606930253183109,-0.119  
496474878266,0.904882032666483,0.941985577839354,-0.00433454075101952  
"Gm44589",0.57479884552572,-0.214761241143638,2.7348293946,-0.07852820  
41971942,0.937407895785526,NA,NA  
"Gm44980",0.175167449853336,0,4.78471990594987,0,1,NA,NA  
"Gm42372",34.0019993732086,-1.13480810264591,0.588721444852482,-1.9275  
8071337161,0.0539072997224681,0.123106644411886,-2.37708737997044  
"Usf2-  
ps1",20.5148642155076,0.222942245343297,0.444113300983428,0.5019940741  
46443,0.615671689381567,0.734751291440922,0.0687159758473966  
"Gm18561",0.169388646659881,-0.534031333812643,4.78471990596514,-0.111  
611827715738,0.911131193462927,NA,NA  
"Gm5586",1.03297983192662,0.973812670644565,1.25414591689987,0.7764747  
76596762,0.437468708201054,NA,NA  
"Gm4881",0.0804673502708677,-0.544048378937456,4.78471990596623,-0.113  
705376621746,0.90947135024012,NA,NA  
"Gm6905",0.627232222660759,-1.31647989888435,1.88535047687729,-0.69826  
799580778,0.48500961011115,NA,NA  
"Gm30191",2.48757876354148,1.74606723726122,0.983365015025241,1.775604  
38960338,0.0757981459937573,0.159435920964036,3.20597707958769  
"Klk1b14-  
ps",0.203616194672694,0.412468840425465,4.78471990596623,0.08620543073  
19313,0.931303113681488,NA,NA  
"Rpl19-  
ps10",0.281130995063134,0.992742043262237,3.91744429089409,0.253415739  
840849,0.799946965904106,NA,NA  
"Ywhaq-ps1",0.114810471722162,0,4.78471990596601,0,1,NA,NA  
"Gm44856",0.484541346044704,0.376826079113651,4.55667006152761,0.08269  
76880102048,0.934091923277733,NA,NA  
"Olfr465-  
ps1",0.263917134316609,2.70126996287134,4.72363208478655,0.57186290430  
437,0.567414857133641,NA,NA  
"Gm9278",0.39160299223597,4.01772027839003,4.67140719248038,0.86006638  
1037689,0.389752451897586,NA,NA  
"Gm44605",0.203347310783361,0,4.78471990595942,0,1,NA,NA  
"Gm18537",48.4623225075498,-2.55115282555685,1.01961543890907,-2.50207  
355460057,0.012346827014994,0.0397520530281297,-8.22770713685343

"Cyp2a21-ps",0.118150081490306,0,4.78471990596588,0,1,NA,NA  
"Gm44523",0.0890758588303569,0,4.78471990596492,0,1,NA,NA  
"Gm44705",0.619774265295857,2.11243768841438,4.36707947972726,0.483718  
626652134,0.628585572099736,NA,NA  
"Gm7238",0.225788979989057,-0.551539244418065,4.78471990596176,-0.1152  
70957393106,0.908230357530707,NA,NA  
"Gm7443",0.808160478348321,-1.15327578933256,1.76016502917713,-0.65520  
8898151848,0.512333266116725,NA,NA  
"Gm8319",1.05376961292996,-0.147964746336674,1.96984042776502,-0.07511  
50927004555,0.940123139511838,NA,NA  
"Gm45186",0.222265746865732,3.19052280584978,4.69750997731396,0.679194  
471381224,0.497014649864957,NA,NA  
"Gm45031",0.470930423975023,2.54421754036105,4.53984521291845,0.560419  
446266869,0.575193370539158,NA,NA  
"Gm45700",3.28628880353704,-0.697173790754112,2.40339226108622,-0.2900  
79069506125,0.771755747819455,0.852431822854301,-0.111312193998522  
"Gm45225",0.44239706553801,2.30872503210262,2.47288298285426,0.9336167  
73664656,0.350501609727076,NA,NA  
"Gm49368",22.9270348212114,-1.25652931566037,0.995257733688471,-1.2625  
165051505,0.206762990996246,0.339746182543081,-1.35649434252706  
"Gm6916",0.428801274067912,-1.02608751389312,2.31962889853856,-0.44234  
9858005126,0.658236057323579,NA,NA  
"Gm7424",0.315756161248252,-0.551260365302163,4.78471990594821,-0.1152  
12672034753,0.908276554732451,NA,NA  
"Gm36864",1.81342304958091,1.44201152248466,1.65083946500568,0.8735019  
68575544,0.382389533710203,0.527258983779881,0.922978827958896  
"Olfr162-  
ps1",0.147836513093437,1.36000788792101,4.78471990596623,0.28423981228  
7688,0.77622660731794,NA,NA  
"Klk1b2-  
ps",0.381729374578553,2.93168601572251,3.68066261790651,0.796510389585  
774,0.425735439149155,NA,NA  
"Olfr188-  
ps1",0.545825448102331,2.36069464997725,2.52758973545545,0.93397065863  
2965,0.350319028490378,NA,NA  
"Olfr1359",0.0983898136351888,-0.544048378937457,4.78471990596623,-0.1  
13705376621746,0.90947135024012,NA,NA  
"Gm17825",0.0794404368123618,0,4.78471990596623,0,1,NA,NA  
"Gm45080",0.232829016333161,-0.909791566626488,4.78256829680788,-0.190  
230752634255,0.849128313975879,NA,NA  
"Gm45226",0.142425137392067,2.57912268336951,4.72883040948399,0.545403  
928674817,0.585475739019112,NA,NA  
"OR5BS1P",2.98913615008851,0.853787021253152,0.896696690327848,0.95214  
6952768381,0.34102245961686,0.485630727257489,0.616696140764837  
"Gm44921",5.29182857979715,2.23495088889583,0.785601277856389,2.844892  
12516834,0.00444264659647593,0.0181391053838964,8.96144939650268  
"Atp6v0c-  
ps1",0.0807535628692872,-0.060715154009512,4.78471990596623,-0.0126893  
852101571,0.989875607161259,NA,NA  
"Gm36028",99.3447684485032,1.61894535916645,0.342822581931553,4.722399

99490372,2.33077705762174e-06,5.36546529746266e-05,15.9189964076726  
"Gm6063",0.936575390705242,0.250255857941358,1.96983409374897,0.127044  
129622649,0.898905471114938,NA,NA  
"Gm9521",2.9127310531052,0.884785707743696,1.05570734479774,0.83809752  
0211161,0.401975935534046,0.545887066875355,0.535598977890236  
"Glud-  
ps",0.270677051750845,-0.544653375691171,4.78471990596021,-0.113831820  
126547,0.909371113718872,NA,NA  
"Gm49388",0.997508394787,-1.70063068021661,2.55101171699552,-0.6666494  
97878257,0.50499604422705,NA,NA  
"Gm18959",0.109359713676695,-0.0702130315065033,4.78471990596623,-0.01  
46744287829581,0.98829192003775,NA,NA  
"Olfr1310",70.9310436377161,1.23495778473193,0.509732650989775,2.42275  
589435746,0.0154032731049916,0.0470520161367894,3.77465039918264  
"Gm17909",1.06967204784174,1.07459336605623,2.41387840668204,0.4451729  
47850879,0.656194774869265,NA,NA  
"Frmpd2",9.20834527482668,-0.432244411312728,0.766682190765658,-0.5637  
85642237315,0.572900024269929,0.699111570485359,-0.154719697736123  
"Gm44911",1.70328370797534,-2.81564308300463,4.73313447774096,-0.59487  
9164377449,0.551924245638341,0.681867302987654,-1.07816664195052  
"Gm44917",0.382293517276318,0,4.78471990595243,0,1,NA,NA  
"Gm44578",124.044939485039,0.901893361140873,0.330733544675567,2.72694  
855317922,0.00639230047724253,0.024005599904714,3.36358256190404  
"Gm44776",0.461636380956859,-0.992395724870694,3.15303552967914,-0.314  
742956598298,0.752956825933161,NA,NA  
"Gm9711",0.204815383380018,-0.530692205745389,4.78471990596536,-0.1109  
1395445818,0.911684579822526,NA,NA  
"Olfr1555-  
ps1",6.29535244905118,0.203289052833655,0.699713438411448,0.2905318687  
24974,0.77140937392599,0.852226186911947,0.0325065923920905  
"Olfr1291-  
ps1",0.188707229769731,0.88711392979353,4.78471990596623,0.18540561354  
2259,0.852910905784306,NA,NA  
"Ccdc194",3.46809569539618,-2.12589327006488,1.14569799960913,-1.85554  
419296373,0.0635185545410057,0.139327795752113,-4.18997806264558  
"Olfr1293-  
ps",0.105706929588637,1.34939020667682,4.78471990596623,0.282020731243  
686,0.777927614012845,NA,NA  
"Gm10988",1.68916781138262,-0.0769854584513988,2.00967890736767,-0.038  
3073426153615,0.969442636524428,0.981116605779783,-0.00146764787610206  
"Cc2d2b",0.763256457040645,0.0124588169646804,2.45458981387404,0.00507  
572258886581,0.995950176700672,NA,NA  
"Olfr1284",277.82357759999,1.16771266837638,0.328328452491803,3.556538  
15413859,0.000375773926739993,0.0027523816767755,6.88400327284835  
"Olfr695",71.9032021677947,1.52854176710903,0.422742015969077,3.615779  
14985589,0.000299445592615105,0.00230683135709574,9.28112280085263  
"Gm18600",1.46810920699968,0.762710345213088,1.30268204341973,0.585492  
330277974,0.558216722219992,0.687041386810088,0.286291523981765  
"Gm18210",0.172215707583243,0,4.78471990596089,0,1,NA,NA  
"Mlnr-

ps",7.22240440507057,2.17156885895118,1.16487847113959,1.8642020715060  
2,0.0622933325871492,0.137293014341038,4.31194931218119  
"Gm29797",7.03556679639717,-0.013532318090201,0.641735364070823,-0.021  
0870692934222,0.983176199811863,0.989235031850681,-0.00014646473943693  
4  
"Gm44984",18.359597979864,0.225099223427044,0.494426205372105,0.455273  
650508946,0.648912380245154,0.760640470723819,0.0615859040721179  
"Gm31663",0.411036334279728,0.340050130264173,3.08216469510187,0.11032  
8345141509,0.912148978306802,NA,NA  
"Olfr1432",0.337235990648832,1.37527256161789,4.78471990595629,0.28743  
0108480514,0.773783010136043,NA,NA  
"Olfr1421-  
ps1",0.0934590605254661,1.37287815859754,4.78471990596623,0.2869296814  
81596,0.774166163073334,NA,NA  
"Gm7972",47.6786459006201,-0.089422018429464,0.338524216620266,-0.2641  
52500882298,0.791662410224897,0.865965423538011,-0.0128687493062877  
"Gm44571",0.593103526512535,0.00676212605696548,1.88652047135568,0.003  
58444350837397,0.997140033989852,NA,NA  
"Gm2676",0.384003549100912,0.369355869980364,3.76727480857839,0.098043  
2510894376,0.921897949381835,NA,NA  
"Gm9354",0.57164882644544,0.907464686229772,2.30195025448329,0.3942155  
93695993,0.693421873858175,NA,NA  
"Gm49320",122.568161113102,0.506120137645493,0.362112343246588,1.39768  
816800824,0.162206728869118,0.284288251639557,0.636580997122796  
"Gm45105",31.7562014155828,0.356932883691055,0.268899255229944,1.32738  
51702781,0.184381302748769,0.312614490521348,0.415036027278438  
"Gm6108",4.41554736034409,0.393980265511076,0.761828659799727,0.517150  
753575808,0.605050926372016,0.726046301697221,0.126129429132233  
"Gm44973",3.94501661340891,2.09570360681288,2.26195084922077,0.9265027  
16685838,0.354184785938249,0.499269444492769,1.45569534115761  
"Gm44600",0.155861027087054,2.04836075035614,4.76342990690174,0.430018  
03120652,0.66718252485168,NA,NA  
"Gm10046",11.1555342980295,-2.36677197281825,0.844647172169559,-2.8020  
8358093352,0.00507737174737213,0.0201339423083713,-9.24306870187219  
"4930431P19Rik",190.1620555336,0.500991854182293,0.188628479570199,2.6  
5597143826761,0.00790803118666218,0.0282452449308553,1.78695285370281  
"3110009M11Rik",0.729764853762442,-1.66192156862668,2.05074441651191,-  
0.810399167856043,0.417710795980497,NA,NA  
"Gm5735",0.132714540959921,2.02621007256121,4.76385795211946,0.4253296  
57795472,0.670596376406083,NA,NA  
"Gm35339",529.158365238487,0.0967406141325628,0.233556101103618,0.4142  
07180525091,0.678722383563135,0.783570906194209,0.0235944284484128  
"Gm5605",0.10946564119701,-0.0648355495453521,4.78471990596623,-0.0135  
50542313774,0.989188562359326,NA,NA  
"Gm45038",122.601551420849,0.488077273567749,0.396484114262666,1.23101  
344041341,0.218317837470651,0.353757267099041,0.507182710539852  
"Gm44715",331.381399914186,0.677094975134413,0.309681492137683,2.18642  
376869387,0.0287846162368772,0.0762283466871084,1.74285728198371  
"Gm44954",4.67754153326782,-0.394209568845377,0.836840230406225,-0.471  
069093623782,0.637591394942015,0.751975173232967,-0.112370214150891



"Gm10297",116.760746666929,0.595272660689414,0.972301869068455,0.61223  
0295576552,0.540385400057575,0.671110479638382,0.237407539210911  
"Gm35060",0.21000357670314,-1.68827967326331,4.75824391397549,-0.35481  
1502685823,0.722730810441824,NA,NA  
"Gm7434",1.22256913915259,-1.25339097990424,1.49820227143139,-0.836596  
635717788,0.402819337295962,NA,NA  
"Gm44938",0.131375587390002,0,4.78471990595286,0,1,NA,NA  
"Gm19182",0.472915079084322,-0.0742203751082943,3.04215935341378,-0.02  
43972673637255,0.980535728006108,NA,NA  
"Phgdh-  
ps1",0.123886891088217,0.414606078118805,4.78471990596623,0.0866521105  
241329,0.930948043429693,NA,NA  
"Dcst2",29.1280443552702,-1.80549911153996,0.661668858430571,-2.728704  
98367185,0.00635835590604359,0.0239103613222831,-6.7407287161583  
"Gm5739",1.06154918502255,3.31675261266491,1.43789266554772,2.30667607  
682768,0.0210728848874441,NA,NA  
"Gm45167",14.8475895283673,1.75833217578432,0.657226161613843,2.675383  
72402381,0.00746437608510372,0.0270521198712551,6.34756140973431  
"Smim38",37.0184041704302,-0.45787752262031,0.338395429139706,-1.35308  
424166473,0.176028719334508,0.302385494236688,-0.54764560352758  
"Gm44576",0.374115074398323,-0.0715449319419103,4.63538925718855,-0.01  
54345035491806,0.987685536849632,NA,NA  
"Prmt1",2824.45241692614,-0.300164404048767,0.123430838857594,-2.43184  
285893961,0.0150222231249647,0.0462357232029302,-0.922706143519683  
"Olfr1438-  
ps1",0.285687256894003,1.36236434168657,4.78471990596037,0.28473230794  
3346,0.775849236570776,NA,NA  
"Gm42402",0.0976407381237603,-0.0631556504614751,4.78471990596623,-0.0  
131994456734498,0.989468671890969,NA,NA  
"Gm44845",28.4989325414107,0.872672670837426,0.416214317503308,2.09669  
065704471,0.0360209681104111,0.090425754630719,2.09722978800988  
"Samd4b",3209.44465964351,0.0792193815501742,0.206407399532699,0.38380  
1073651065,0.701125892241873,0.801118415128016,0.0175666212819298  
"Gm44805",1.53329869917712,-2.52782502281475,2.10372835567505,-1.20159  
288436439,0.229521299711994,0.3662198282966,-2.53925458901902  
"Gm18782",0.945226783027537,2.21311441191528,2.27726282106743,0.971830  
915360889,0.331134673091601,NA,NA  
"Gm45015",22.6574117489771,-0.42025732870816,0.438343413522113,-0.9587  
39918848943,0.337689783081926,0.482258506594258,-0.306483158335899  
"Gm19410",4.52518757778412,0.144479724275954,0.92891227865355,0.155536  
456559037,0.876398415458457,0.922809161569004,0.0116064643659018  
"Gm49396",1389.37154081954,-0.288722296419574,0.144520718486172,-1.997  
79173148243,0.0457392441496238,0.108494377424497,-0.641268656822219  
"Gm5737",1.37087088070997,-1.84901223534887,2.24986566099321,-0.821832  
284214079,0.411172356815417,0.554697198726008,-1.08968374649904  
"Gm3854",75.0380874007558,0.252145609581849,0.293264900272592,0.859787  
889200098,0.389905976381422,0.534131230156079,0.158123971422734  
"Gm19963",7.21868055023566,2.86028548073521,0.938370385405208,3.048141  
25128222,0.00230261665636003,0.0111377870418526,12.8638814263294  
"Gm7067",0.150853697515523,-0.0675701563133231,4.78471990596623,-0.014

1220714360035,0.988732591751223,NA,NA  
"Gm9195",2.16927097819894,-4.12575845330046,1.71802539382811,-2.401453  
70849696,0.0163300750837057,0.0492732596691573,-12.4200749272885  
"Gm45224",4.02027701568878,0.823853356089852,0.921576955897397,0.89396  
045638708,0.371343049039737,0.516539661960966,0.544240166258693  
"Olfr1280",0.272867794924084,1.37661722811869,4.78471990595906,0.28771  
1141963442,0.773567860443413,NA,NA  
"Gm45042",0.213886003740603,-1.12814391608354,4.77826472329474,-0.2360  
99082284762,0.813355786034169,NA,NA  
"Gm4756",14.2715641795808,0.546155560358094,0.631950615365601,0.864237  
722186769,0.387457313871502,0.531829827938511,0.344859941099595  
"Gm7451",13.6912667396923,0.369500233156629,0.523128868302175,0.706327  
361278778,0.479984581795376,0.617412546236063,0.178179606543509  
"Gm45208",2.16431214634954,-4.7389653347991,1.55021795331824,-3.056967  
13462474,0.00223588789487079,0.0108906675428905,-21.4194079437825  
"Rps12-  
ps4",1.33342685945149,0.466877007226026,1.38820867150831,0.33631615823  
2003,0.73663246637643,0.827782826892262,0.0882418298030086  
"Gm42417",26.7030514479462,-1.75647392883835,0.846231431924893,-2.0756  
425046077,0.0379270272008213,0.0941200428104382,-4.15087154221162  
"Nup62",1056.85399934569,-0.521869923128694,0.188683319046267,-2.76585  
087524736,0.00567744908674666,0.0218513427345808,-1.99536594943055  
"Gm45049",0.116779199695001,0,4.78471990596232,0,1,NA,NA  
"Gm6882",4.78336488297943,-0.0476293761205861,0.866276434693966,-0.054  
9817289413077,0.956153019964452,0.973274423558699,-0.00129024159847126  
"Gdf1",33.4247423643413,-0.654289532656555,0.657702371601102,-0.994810  
967556285,0.319828211031254,0.464957534945376,-0.501060943744213  
"Gm19091",0.106589165945835,-0.0635055109022761,4.78471990596623,-0.01  
32725660331943,0.989410335395124,NA,NA  
"Olfr1309",1.70501960192845,1.63003885609952,0.961303461325634,1.69565  
482875897,0.0899512677511926,0.181950048930634,2.7776238418714  
"Gm44821",31.4240092991022,0.521453769511884,0.354975683319617,1.46898  
447982526,0.141836998876876,0.256733921658125,0.7090285407316  
"Gm6112",0.0862694334274754,-0.544048378937456,4.78471990596623,-0.113  
705376621746,0.90947135024012,NA,NA  
"Gm38941",1.2441814352131,-1.90981013133232,2.11265579441909,-0.903985  
465297936,0.366003108522194,NA,NA  
"Gm8463",0.925421614922233,-2.9122976038948,2.03227332771997,-1.433024  
56621922,0.151850816932458,NA,NA  
"Muc16",5.63838613090278,-4.87141556976283,1.55660338905441,-3.1295162  
3002831,0.00175094399633531,0.0090341115124262,-22.9285242146567  
"Cfap99",1.27873286926165,-3.98779458756995,1.98733069150953,-2.006608  
46461387,0.0447913693141239,NA,NA  
"Gm6853",0.165772777902225,-0.544232659523091,4.78471990596623,-0.1137  
43891015327,0.909440818279266,NA,NA  
"Gm45492",28.0075796303225,0.818560698433588,0.491041013303342,1.66699  
048807949,0.0955162962737108,0.190660404493114,1.35656906575116  
"Gm18212",11.3823572476419,-0.964502693390875,0.57610435219349,-1.6741  
8053642292,0.0940951235060874,0.188402825849424,-1.60992177490652  
"Zfp148-

ps1",0.158098269904163,-0.0758669917365028,4.78471990596623,-0.0158560  
988370294,0.987349193647839,NA,NA  
"Gm4972",1.62041378424367,-3.49000235347756,2.22302981799871,-1.569930  
51789987,0.116431276825863,0.221329534517956,-5.26328155922173  
"Gm7432",1.65441362277282,-0.685283826039132,1.70449443474964,-0.40204  
5211804865,0.68765075295782,0.790381872490211,-0.161205528151307  
"Gm45473",0.125692873595402,-0.0687107269123147,4.78471990596623,-0.01  
436044915119,0.988542413139458,NA,NA  
"Gm7669",0.295074496352177,-1.18126663114363,4.77665056224728,-0.24730  
0198276986,0.804675905350154,NA,NA  
"Gm48810",0.105225717771186,0,4.78471990596623,0,1,NA,NA  
"Gm31941",1.40319289835702,0.969223369227407,1.38875609830132,0.697907  
552242565,0.485235011051398,0.62256446966376,0.459322795966198  
"Gm3912",19.1135554121747,-0.425100908168261,0.608971657372444,-0.6980  
63535505843,0.485137461013856,0.62248027210109,-0.201516255428838  
"Gm45660",0.360885994428235,1.62594493242563,3.83018221166515,0.424508  
507055794,0.671195002513499,NA,NA  
"Gm9520",2.28815847403684,0.507323326455756,0.946658590594432,0.535909  
494189657,0.592021102495042,0.714972279742851,0.170212813607769  
"Gm9712",1.27150073473059,-1.87291775996279,2.1180770956443,-0.8842538  
18623662,0.37655921181446,NA,NA  
"Nxpe1-  
ps",21.4938397244928,-1.26046307311117,0.563918790667097,-2.2351854450  
888,0.025405176629023,0.069337924679828,-3.36387755119508  
"Gm31166",88.940545302262,-0.527248555294511,0.288648229879934,-1.8266  
1281350599,0.0677580054293211,0.146387322976277,-1.01310771563403  
"Gm45299",0.491555769160064,0.775804375970507,3.09301615713569,0.25082  
4546836168,0.801949762478903,NA,NA  
"Fth-  
ps3",0.131207202007652,0.889087494728783,4.78471990596623,0.1858180859  
49012,0.852587421002034,NA,NA  
"Gm4974",0.138638043825212,0,4.78471990596623,0,1,NA,NA  
"Gm45445",0.140997258679385,0.8508329144448,4.78471990596623,0.1778229  
30321139,0.858862038553124,NA,NA  
"Gm8667",0.122275414513165,0,4.78471990596,0,1,NA,NA  
"Pvrig",8.22893879797272,-2.08379439802331,0.88929930595967,-2.3431868  
0342905,0.0191198074578152,0.0555172487692644,-6.02437779529732  
"Trim61",66.4629063042778,0.639709284401369,0.422197787060802,1.515188  
62487368,0.129724642920436,0.239750813996461,0.913604121837701  
"Gm18194",121.158921716909,0.293129663245015,0.442336956384184,0.66268  
4089616112,0.50753290176309,0.64208905518925,0.129864727494686  
"Gm17949",15.4672157327579,-0.295925397508103,0.478882399930858,-0.617  
950038570701,0.536608272873716,0.66817857372178,-0.119317065600059  
"Gm7561",0.108288886729145,1.37677867329991,4.78471990596623,0.2877448  
83787902,0.773542030017596,NA,NA  
"1700018G05Rik",0.537184795485729,-1.88375485711601,3.15899820924074,-  
0.596313999674209,0.55096548035489,NA,NA  
"Hmgb1-  
rs17",0.153291428898065,1.36830980433263,4.78471990596038,0.2859749016  
08787,0.774897344756212,NA,NA

"Gm8489",3.49503783881473,0.224763139515391,1.18255609769778,0.1900655  
19896234,0.849257788676867,0.90391551742025,0.0227054323574744  
"Gm6503",0.555833804075772,1.270374513792,2.7370894444975,0.4641333575  
5099,0.642552203856999,NA,NA  
"Klkb1",293.976905380981,0.881774410367683,0.39480069899047,2.23346719  
654356,0.0255181512101764,0.0695683602203607,2.35032155436106  
"Gm18227",7.31183255875842,-0.711193520756983,0.648525620863418,-1.096  
63134019306,0.272802581590095,0.415457684592961,-0.624694261738002  
"Gm45446",0.188762321400228,2.14585556175149,4.75550703117065,0.451235  
914001635,0.651819527929467,NA,NA  
"Gm35315",61.6603218460877,-0.0862710974334207,0.273391775828507,-0.31  
5558495393573,0.752337644940217,0.838952210525842,-0.0151493370645222  
"Gm2033",43.3624760893045,0.541396754478717,0.420825466422286,1.286511  
38696878,0.198264647377827,0.329345496429384,0.601301189059327  
"Gm45594",2.36624550736643,1.14423919988773,1.00867937277205,1.1343933  
7689947,0.256629576006522,0.397502659117824,1.05562205640031  
"Stambp-  
ps2",0.0804673502708677,-0.544048378937456,4.78471990596623,-0.1137053  
76621746,0.90947135024012,NA,NA  
"Olfr1316",0.726391501567941,-0.555827814511483,2.60362133479449,-0.21  
3482585613916,0.830950570718884,NA,NA  
"Gm34066",0.402901182886934,0.884105437574845,3.74896077298252,0.23582  
6804042947,0.813567068065101,NA,NA  
"Olfr1279",0.920195882660378,-1.70658408127914,2.2300610649219,-0.7652  
63385888002,0.444114721966032,NA,NA  
"Olfr730",0.215297991364878,-1.74253742989106,4.75652926150913,-0.3663  
46412286801,0.714106601113662,NA,NA  
"Gm17841",0.219453611187957,-0.0713614343346017,4.78471990596345,-0.01  
49144434234614,0.988100437018787,NA,NA  
"Gm45692",0.30193348255642,-0.0772010322125564,3.94300338257263,-0.019  
5792457479928,0.98437902015416,NA,NA  
"Gm39288",0.0796463430875519,0,4.78471990596623,0,1,NA,NA  
"Eid3",27.677382643804,0.174398787679908,0.369819781089715,0.471577770  
031724,0.637228197056869,0.751644004005737,0.0497895399707779  
"Hspa14",1181.54149339368,-0.206224927811668,0.107080281906975,-1.9258  
9078156168,0.0541180127413834,0.123443263035973,-0.431417112292835  
"Gm18706",0.829661869953547,-0.313792340173146,2.12284508198564,-0.147  
816881616079,0.882487286094198,NA,NA  
"Gm6012",8.64946866157036,0.802424623809826,0.695524553197083,1.153697  
04796381,0.248624394609763,0.388069411754362,0.75955192599536  
"Chmp1b",2363.3904154131,-0.186886485830813,0.159949255419173,-1.16841  
11022652,0.242640978765612,0.381495737256774,-0.180094209001278  
"Gm7380",0.349339046207833,0.334394459233343,2.71483041521704,0.123173  
240346436,0.901969915295917,NA,NA  
"Gm45551",949.256723134244,-0.0652815248623056,0.319120931187025,-0.20  
4566728416966,0.837910652505079,0.896388779904753,-0.00714056199443995  
"Gm45315",23.3284910429119,0.561361700018327,0.594292120735548,0.94458  
8831707102,0.344868830980163,0.489356849316004,0.401184606401349  
"Gm45808",0.772836323706959,-2.70055721483788,3.63086378968012,-0.7437  
78167199105,0.457010690657851,NA,NA

"Gm45268",13.5334157597567,0.917723587199732,0.46591950195311,1.969704  
17282961,0.0488722844766163,0.114405914262483,1.98962703436272  
"Gm7600",0.540177994533778,0.870867711088338,2.57219460043925,0.338569  
916498395,0.734933748592981,NA,NA  
"Exosc6",200.155215049466,1.82431498428187,2.36511127138067,0.77134425  
189936,0.440502909339417,0.582260573947526,0.986657426057276  
"Brd3os",369.183884891354,0.723852289267593,0.237395174352479,3.049144  
91729656,0.00229493748797831,0.0111144289966719,3.25698141408745  
"Gm45612",0.193503565552391,0.880482062149104,4.78471990596623,0.18401  
9562158947,0.853998108599404,NA,NA  
"Gm17995",0.162036551369418,0.4.78471990595057,0,1,NA,NA  
"Gm19196",77.7825953008182,0.304680714516639,0.418515137333417,0.72800  
4048928607,0.46661110775798,0.605337893480938,0.152940113699091  
"Gm45651",0.293835139625429,0.4.78471990595679,0,1,NA,NA  
"Gm45403",0.14728986473751,0.4.7847199059615,0,1,NA,NA  
"Olfr560",1.01427888746174,1.96426771152768,2.11034090262622,0.9307821  
82671648,0.351966248039363,NA,NA  
"5430437J10Rik",98.1593089529011,-0.807812178203787,0.56632092122373,-  
1.42642121795224,0.153746792663792,0.273236813003932,-1.04806877855095  
"Gm49369",7.50773575518395,-1.23395967633215,0.829491189718596,-1.4876  
1034671239,0.136853683200984,0.249847669948762,-1.71138344687136  
"Gm18857",0.0805927130885556,-0.544048378937457,4.78471990596623,-0.11  
3705376621746,0.90947135024012,NA,NA  
"Gm2225",1.82379950515974,1.70546294235221,0.935848873482279,1.8223700  
3289453,0.0683988583997144,0.147494021353421,3.26420087814167  
"Gm19164",0.0986278335485662,0.4.78471990596623,0,1,NA,NA  
"Gm45623",0.867853708431153,-0.998235722096393,2.19858239601325,-0.454  
036075203058,0.649802861827735,NA,NA  
"Olfr537-  
ps1",0.0879698178093193,1.37845926339006,4.78471990596623,0.2880961248  
47603,0.773273158858672,NA,NA  
"Gm45344",2.39241912129055,1.36288748580923,0.919294054966021,1.482537  
03855358,0.138197455900568,0.251711723040567,1.88006349373411  
"Gm45717",0.684489079348239,-1.05496663249033,2.2176986762554,-0.47570  
3324254877,0.634285752313376,NA,NA  
"Gm45844",312.645362436344,0.229463995435628,0.181050624784715,1.26740  
239481902,0.205011443938062,0.337696471564106,0.249107903282074  
"Gm5599",0.11041357390858,-0.0588656168895936,4.78471990596623,-0.0123  
028344493461,0.990184005963755,NA,NA  
"Gm45471",0.377408233623867,-1.11183682149914,4.72081805584701,-0.2355  
17829398672,0.813806842143341,NA,NA  
"Gm5609",0.328140982559301,-1.39383344709043,2.67973492464124,-0.52013  
8553359725,0.602967008956006,NA,NA  
"Olfr562-  
ps1",0.11612695790485,-0.0587343567230752,4.7847199059604,-0.012275401  
2517867,0.990205892835773,NA,NA  
"Gm18562",0.428239500730416,-1.04831922352344,2.27275597664901,-0.4612  
54632830886,0.644615929471254,NA,NA  
"Gm4247",12.9105058706794,-0.241305871184484,0.648337293825591,-0.3721  
91872166771,0.709749997181943,0.807448289520825,-0.0516095981332113

"Gm45785",0.745606394595812,1.04608777612722,4.11960395295599,0.253929  
209718474,0.799550248125967,NA,NA  
"Gm7351",0.124986438930883,0,4.78471990596178,0,1,NA,NA  
"Gm4032",74.8470761103778,0.988822967548576,0.305200415728975,3.239913  
56691556,0.00119565936901599,0.00673771971628047,4.94414819304358  
"St6galnac2.1",657.720590632711,0.794726281601533,0.31852731569278,2.4  
950019745498,0.0125956429263575,0.0403466150448693,2.55126827933331  
"Gm39147",0.330009590465382,-2.3592020043057,4.7409996973872,-0.497616  
991118113,0.618754025503164,NA,NA  
"Iqip",1947.58591218143,-0.132233213546456,0.104893121168051,-1.260647  
14324406,0.20743600545203,0.340516941535591,-0.142453571482137  
"Gm45665",18.9549837337481,0.0494115915724234,0.442171579679523,0.1117  
47551953104,0.911023574417858,0.945280083387515,0.00278058844098182  
"Gm7192",0.232262612447558,-0.55013556619764,4.78471990595892,-0.11497  
7590540357,0.908462884386607,NA,NA  
"Pde2a",679.17435137135,-1.21848668962306,0.484751885461447,-2.5136296  
0344787,0.0119495862350268,0.0388639170109569,-3.95726586982768  
"Flt3l",1292.95092886459,-0.666682617387626,0.257983192326839,-2.58420  
950362923,0.00976024868306031,0.0331542384707857,-2.27111081293844  
"Gm20219",320.00102773519,-0.593609695377956,0.1964246391472,-3.022073  
49319912,0.00251049588160088,0.0118694589474913,-2.63193874440366  
"Gm36210",2.47828574044421,-1.1563640969923,1.2794098016915,-0.9038261  
98191914,0.366087567713591,0.511133218423173,-0.776064879270689  
"Gm45799",94.1793343763447,-1.01173791117632,0.443572163528892,-2.2808  
8684178763,0.0225551437744996,0.0631868093843669,-2.79407582828277  
"Gm18258",0.583806227359825,2.66237685852072,2.94397319926294,0.904348  
198274112,0.365810796959874,NA,NA  
"Gm2253",4.47704605386929,-0.201025605409663,0.736168893243117,-0.2730  
69953450581,0.784799442942561,0.860969984723685,-0.0300926558762304  
"Gm45269",0.194853943900061,0.361145111693222,4.78471990596623,0.07547  
88407243855,0.939833732161837,NA,NA  
"Gm2961",1.82246960787466,-1.60441462039594,1.62188556975362,-0.989228  
001232952,0.32255160131581,0.46766157345294,-1.21937176259606  
"Gm32742",41.3249286167576,0.22202878250434,0.275768339241848,0.805127  
895083059,0.420745880067574,0.563789648103742,0.127238936139158  
"Gm5905",15.7929409252564,-0.715765724483068,0.470972389714707,-1.5197  
6154040929,0.128570918375737,0.238278690532522,-1.02663302963356  
"Gm45871",542.443667403399,0.190659182565811,0.158984079941702,1.19923  
443048967,0.2304368028764,0.367229814669722,0.190996159114668  
"Gm37419",0.420744942026812,2.68849104874785,4.59548789083555,0.585028  
426276417,0.558528603132384,NA,NA  
"Gm45647",305.663279782799,0.865521799882496,0.448576472892604,1.92948  
549954316,0.0536706185142996,0.122652334715402,1.81621221967146  
"Gm8189",46.1761953624207,1.99784015883206,0.422823006883038,4.7250034  
3242841,2.30111469526972e-06,5.32231723942692e-05,19.660778337288  
"Gm18192",0.118862692616217,-0.548389379531595,4.78471990596623,-0.114  
612639884686,0.908752160556547,NA,NA  
"Gm2767",0.51397497715172,-0.45325413743835,2.65438198659701,-0.170756  
936916768,0.864414891028378,NA,NA  
"Gm40460",0.517599614480223,2.05616157859674,3.60361615780129,0.570582

850269849,0.568282446379919,NA,NA  
"Nudc-  
ps1",0.391104647061564,-1.48372635058743,4.76464724647159,-0.311403189  
750551,0.755494129304077,NA,NA  
"Gm19935",58.1648341738168,-0.941357218732688,0.501482703008078,-1.877  
14793169551,0.06049782155196,0.134379872934622,-1.88938359287508  
"Gm45716",449.154394996955,-1.38751191333781,0.655925013342615,-2.1153  
5142754657,0.0344000063358395,0.0873050779836489,-3.38323502679919  
"Gm33543",82.6638492069171,2.41026507346151,0.647948366668191,3.719841  
26737646,0.000199348024020692,0.00169215836846123,15.3817101540257  
"Gm7514",0.317972562338708,-0.900050218939297,4.78336172400198,-0.1881  
62692029545,0.850749117514604,NA,NA  
"Gm45380",35.5169260321991,0.816675690580309,0.453459407784239,1.80098  
962897445,0.0717045146182478,0.152813927863875,1.53415326035829  
"Gm8291",0.0897701766153851,-0.0649468432430149,4.78471990596623,-0.01  
35738025463163,0.989170005085621,NA,NA  
"Gm5749",0.083192810662363,-0.0591380563472246,4.78471990596623,-0.012  
3597739281422,0.990138578286751,NA,NA  
"Gm9619",1.2049814219024,2.13769129694675,1.36409093152321,1.567117886  
0193,0.117087139204914,NA,NA  
"Gm7269",0.992690390094056,3.20032053067355,1.89093069087407,1.6924578  
7067649,0.0905587063043767,NA,NA  
"Gm18991",1.64343124097411,0.0583143969228889,1.53927860195299,0.03788  
42380118203,0.969779980272171,0.981407071954471,0.0010944416487862  
"Rnf223",37.061767296991,-1.40928898485966,0.389247847116684,-3.620544  
07056798,0.000293984168715527,0.00227487512763108,-8.57669334767032  
"Gm45454",2.30302118070879,0.126746770870672,1.30889950278444,0.096834  
6084638595,0.922857739493054,0.952460311488226,0.00617343476261234  
"Gm19248",0.914133107216938,-0.702302748381155,2.07417661678412,-0.338  
593513540824,0.734915969712877,NA,NA  
"Gm17999",4.13346086299881,-1.26945335284427,0.833293583873161,-1.5234  
1668940235,0.12765448919054,0.236980598899091,-1.82772974302328  
"Gm45756",1.61951937038394,-0.666603655033616,1.37050066385162,-0.4863  
94259131704,0.626687660096525,0.743348095666263,-0.197708540494967  
"Mup22",400.297223965966,0.152938069191418,1.52697351932258,0.10015764  
3375025,0.920219172554321,0.950948988554825,0.00769199842239096  
"Gm10033",557.765060986811,-0.0418420424753406,0.11770170457877,-0.355  
492238834473,0.722220858245316,0.816671245958776,-0.00847379424116052  
"Gm18646",1.12595243165269,-3.33462282909619,2.05217034274725,-1.62492  
49682812,0.104178547303865,NA,NA  
"Gm45752",0.252891078598848,0.4.7847199059471,0,1,NA,NA  
"Gm21769",0.254082760932667,-1.71680994557166,4.75710260511295,-0.3608  
94033213919,0.718178664232447,NA,NA  
"Gm10358",5.94284814413261,0.836733057965691,1.508811906111,0.55456419  
3572937,0.579192786149233,0.703965219429095,0.293715333075273  
"Gm45739",9.86442762477719,0.0188462586832856,0.488697226348711,0.0385  
642841153303,0.969237778244808,0.981062046421496,0.000360332423963459  
"Gm3045",1.20503650841117,-2.86484548285876,1.84252862534982,-1.554844  
49112146,0.119983110122435,NA,NA  
"Gm5743",5.49177679810489,2.21570390328016,1.88145406408802,1.17765506

241799,0.238934148773659,0.376981553065934,2.16154993645047  
"Gm32842",14.6960375325175,0.361023048274433,0.827661235071035,0.43619  
6638161322,0.662694066875422,0.77118525311471,0.0938034120461708  
"Gm45879",0.281721368270423,-0.565350668479351,4.010637889031,-0.14096  
2780515681,0.887899345532716,NA,NA  
"Gm45900",3.87330632550517,1.15373859248528,0.981272343756236,1.175757  
78001534,0.239691682099603,0.377942407541418,1.12260317516261  
"Gm8804",0.0721532113593248,-0.544048378937457,4.78471990596623,-0.113  
705376621746,0.90947135024012,NA,NA  
"Gm8637",0.209844225032827,0,4.78471990595858,0,1,NA,NA  
"Gm9644",0.0837058623428614,-0.544048378937457,4.78471990596623,-0.113  
705376621746,0.90947135024012,NA,NA  
"Olfr839-  
ps1",701.313662254355,0.937212622001999,0.162805770984209,5.7566302246  
9212,8.58095911212018e-09,7.05955868219913e-07,13.2744107020542  
"Gm45893",4.49630566808835,1.31732996344315,1.00262788037198,1.3138772  
5120352,0.188887515330322,0.318097147513441,1.50886769501369  
"Gm1943",1.97695755059594,-0.0161550504740028,2.18134841956427,-0.0074  
0599270117051,0.994090926783892,0.996250456664318,-6.06879090498101e-0  
5  
"Gm35857",1.39833692166981,0.298204461404733,1.46601305931145,0.203411  
872432291,0.838813120929986,0.896910717073642,0.0324443343474111  
"Gm7730",23.4259537227889,0.629139286196184,0.610805294088814,1.030016  
09888585,0.30300244837916,0.447617236354056,0.505712724575084  
"Gm45856",0.17446029106697,0,4.78471990596073,0,1,NA,NA  
"Gm45750",0.0794221270798576,-0.544048378937457,4.78471990596623,-0.11  
3705376621746,0.90947135024012,NA,NA  
"Gm5159",6.24057450514621,-1.81391624164839,0.904253702611431,-2.00598  
154744616,0.0448582167732523,0.106945158049906,-4.05489932245708  
"Gm7208",0.385309350421388,-1.40878012642906,4.71989183445875,-0.29847  
7205800333,0.765338970840153,NA,NA  
"Gm18860",0.554793302246888,0.853269287496635,3.67724208379757,0.23204  
0553233157,0.816506516324766,NA,NA  
"Gm45778",0.321610997999476,-1.29389068754055,3.90496111732351,-0.3313  
45344720717,0.740383643754954,NA,NA  
"Gm45704",0.121476062291212,0,4.7847199059656,0,1,NA,NA  
"Gm31371",1.89731645568013,-3.73602953731494,1.85075891534616,-2.01864  
732696218,0.0435238882807954,0.104652703625471,-8.43262214007305  
"Gm8798",45.3170493603003,2.15588521214054,0.481856480263539,4.4741231  
0603655,7.67255301307714e-06,0.000138261958085932,19.1579730304431  
"Gm45878",0.316746762669923,-1.8594797821286,3.19454188937936,-0.58208  
0262685134,0.560512619060528,NA,NA  
"Gm45834",0.103697688899752,2.13807379115321,4.75860190304268,0.449307  
135733735,0.653210110926285,NA,NA  
"Gm8838",0.331163393849634,2.04005438524721,4.73053178848699,0.4312526  
53287782,0.666284672719019,NA,NA  
"Gm7769",1.83978058335628,0.747266368575391,1.33071104539341,0.5615541  
94024497,0.574419796666669,0.700177369055183,0.266341868489536  
"Gm7850",1.66416385220328,0.585499559874991,1.49943717232631,0.3904795  
55049723,0.696181970544368,0.797419964553361,0.132541764533268



"Olfr837",0.102641668518582,-0.0625403067770832,4.78471990596623,-0.0130708396742513,0.989571275780478,NA,NA  
"Iqcn",2.60246086966498,-0.54575838305569,1.09611182079169,-0.497903929784741,0.618551757332484,0.73688044018261,-0.166636202407549  
"Gm45880",3.27941273201891,0.251456111581445,0.96434286274314,0.260753847305055,0.794282337897259,0.868052072435444,0.0355819387031643  
"Gm6831",2.44693906544432,-3.48248465148288,1.68630035396825,-2.06516273526706,0.0389076051389162,0.0959793123733031,-8.16162975721766  
"Gm45710",0.129957633561986,-0.550526199676728,4.78471990596623,-0.115059232409876,0.908398173058889,NA,NA  
"Gm7390",0.519128794504342,-1.96652308990851,2.01402288301416,-0.976415465034559,0.328858620799682,NA,NA  
"Gm40466",13.9278667252377,-0.409221836415928,0.586772029679625,-0.697411968732323,0.485545013423159,0.622757312967028,-0.193806799559276  
"Gm45857",0.143110177771562,-0.0491920686972126,4.78471990596623,-0.0102810759383999,0.991797032750217,NA,NA  
"Gm45727",31.6185963777825,1.6613720062132,0.674259604566288,2.46399457265701,0.0137398191922937,0.0432863135581423,5.21657315962938  
"Gm5362",16.0011608906837,-0.647247692398109,0.601246346867472,-1.07650997926275,0.281699240284831,0.425589792080163,-0.552930322427523  
"Aprt-  
ps",0.780968372202568,-1.93793147885697,2.58010426025195,-0.751105879212699,0.452588937771562,NA,NA  
"Gm10060",1.9657907460778,-1.97053547499585,1.37341336213093,-1.43477231933906,0.151351988247486,0.269971737887611,-2.58029403121471  
"Gm45777",0.214017293552713,-1.4309834428668,4.76792920177091,-0.300126822842776,0.764080420088693,NA,NA  
"Rpl10-  
ps5",5.15109079893754,2.05897451537986,1.3177919020625,1.5624428349858,0.118183702768942,0.223875044844926,3.08159966046139  
"Gm5373",195.720357785075,0.943405525787875,0.292190218872075,3.22873753074162,0.00124337953825488,0.00694852801286722,4.68799473761118  
"Gm45855",4.3004818764872,1.25315759471137,0.81945569995812,1.52925605957151,0.126200978035235,0.235177928866578,1.81383647735834  
"Gm18001",0.128676047129911,0.4.78471990596093,0,1,NA,NA  
"Gm20946",0.607852906485174,1.35638728108987,3.03079144678099,0.447535670107059,0.654488339135171,NA,NA  
"Gm6013",2.82145185119685,-0.200204571526035,1.53436602624422,-0.130480320928436,0.896186422656441,0.936132158413976,-0.0132132249548911  
"Gnb1-  
ps3",0.133947921007047,-0.543880009074309,4.78471990596623,-0.113670187547682,0.909499246198849,NA,NA  
"Gm46223",25411.5817613485,0.32932613341942,0.416482759546402,0.790731731075962,0.429100555376713,0.571684498034516,0.184148640851709  
"Gm49353",0.192840906546725,0.4.78471990596425,0,1,NA,NA  
"Gm48674",0.656636819800102,-0.0799129127312464,2.47966110238689,-0.0322273526226318,0.974290743265878,NA,NA  
"Gm5171",1.82644022669448,1.59550200852847,1.34545910892555,1.18584206531747,0.235684675852057,0.373547375204309,1.5711074867692  
"Gm6607",4.0460390081481,-0.719200367021771,0.968289838830142,-0.74275

3190398741,0.457631120139554,0.597444061650789,-0.37045623991841  
"Gm29761",33.9632655163266,0.445336638767712,0.505845790640317,0.88038  
0240396959,0.378653357169015,0.523504442890269,0.28822621990263  
"Gm18541",0.08672856686944,0,4.78471990596623,0,1,NA,NA  
"Gm48407",0.147567504339374,0,4.7847199059593,0,1,NA,NA  
"Gm47496",2.28411161691008,0.275000683810586,1.17164451424451,0.234713  
413895774,0.814431175764287,0.881915976066426,0.034556171431256  
"Gpx4-  
ps2",7.72780791869359,-0.516895959226119,0.942565591371613,-0.54839256  
1703782,0.583422382782262,0.70750736977817,-0.178849740534241  
"Gm48652",0.231196324672178,-1.14244183201202,4.77844274586698,-0.2390  
82456936446,0.811041644702279,NA,NA  
"Gm7642",1.60308710384085,1.04286084400147,1.44937207177244,0.71952596  
8736345,0.471816907603931,0.609686620323555,0.516018173404115  
"Gm48739",0.163734338717856,-0.880712889014032,4.78321635523181,-0.184  
125664324325,0.853914873449145,NA,NA  
"Cbx3-  
ps8",39.5106895214953,-1.29861057998038,0.632092955089403,-2.054461404  
01407,0.039931055258163,0.0977618929462157,-3.01955583891075  
"Gm48862",0.667962464678714,-2.21513386172194,2.59768742923514,-0.8527  
33025841435,0.393807371943566,NA,NA  
"Gm5917",0.288547835662071,1.36323621080675,4.78471990596148,0.2849145  
27412197,0.775709625807267,NA,NA  
"Gm19936",1.93518770204145,1.22027295438068,1.12207519506931,1.0875144  
1948176,0.276809529503941,0.420369907637233,1.05751321966613  
"Gm8834",2.93272839051013,-4.30793382112797,1.6243627950224,-2.6520761  
4599948,0.00799984982564288,0.0285105231037077,-15.3253971471126  
"Gm19212",0.117437178867167,0,4.78471990596623,0,1,NA,NA  
"Nudt8",1623.74925768717,1.30723661859218,0.37357003726227,3.499307996  
35951,0.000466467421012504,0.00326694747661703,7.48249066601024  
"Gm7439",0.906827162279204,0.961314676572384,2.32212896578207,0.413979  
88257238,0.678888840001369,NA,NA  
"Supt4b",2.00248905350583,0.949856853852807,1.33186146498955,0.7131799  
20601022,0.475734429709638,0.613361034908275,0.464291504774065  
"Gm47062",0.0886915477092957,-0.544048378937457,4.78471990596623,-0.11  
3705376621746,0.90947135024012,NA,NA  
"Gm20953",0.244254262932379,-0.533160992611951,4.04501135214927,-0.131  
80704482539,0.895136914207593,NA,NA  
"Gm19208",0.121821870984685,0,4.78471990596557,0,1,NA,NA  
"Gm48598",0.514839769781104,-1.95509105516621,3.12020067758791,-0.6265  
91446251979,0.530927076737442,NA,NA  
"Gm7444",0.246835907753636,0,4.78471990595523,0,1,NA,NA  
"Gm3126",0.0918739685569403,-0.0614254105206179,4.78471990596623,-0.01  
28378278619872,0.989757176708433,NA,NA  
"Olfr941-  
ps1",0.307728601694309,2.26176204741583,4.75172211420313,0.47598786146  
507,0.634083025734883,NA,NA  
"Gm48391",110.578601282199,0.601135474383513,0.478447262618899,1.25642  
995863964,0.208960125442396,0.342522448581407,0.644067415858623  
"Gm47185",0.0789318165836824,0,4.78471990596069,0,1,NA,NA

"Gm18252",0.234076167861345,-1.2169811444485,4.77884584065655,-0.25466  
0054964506,0.79898567072854,NA,NA  
"Zkscan7.1",211.285829677091,-0.783411943234436,0.274064352422421,-2.8  
5849632142945,0.00425654043966379,0.0175834799772383,-3.16560741992084  
"Gm30285",48.5483946717818,0.714206332529691,0.61812537376338,1.155439  
2730739,0.247910587161995,0.387258502522398,0.677541010454475  
"Gm17875",0.439677908526807,-0.548610534874264,3.1130810470264,-0.1762  
2751434573,0.86011520572187,NA,NA  
"Gm8512",0.29457972947502,0,4.78471990595405,0,1,NA,NA  
"Gm6545",70.7407755029019,0.86915258797792,0.425001930280359,2.0450556  
2458168,0.0408493744904395,0.0995352541632829,2.00534655862261  
"Gm5949",1.04207735436795,-0.386541009589697,1.37006878755538,-0.28213  
2556482367,0.777841870338556,NA,NA  
"Gm5831",10.3514856735341,-0.512462859908079,0.885173891490908,-0.5789  
40324420248,0.562629440014867,0.690641451864132,-0.189680170510371  
"Gm5120",0.202581919507048,2.56919214996948,4.72927557229621,0.5432527  
9013548,0.586955764175815,NA,NA  
"Gm48849",0.285930375498112,-0.273722324166733,3.2707979896744,-0.0836  
867104085449,0.933305523634859,NA,NA  
"Gm7293",0.52520780497795,-1.93411291894034,2.68974751875755,-0.719068  
576307769,0.472098667728904,NA,NA  
"Gm46136",405.185575811361,0.246802230125176,0.17791986698663,1.387153  
85923553,0.165394851674675,0.288192030201323,0.307053626540108  
"Gm47803",10.4068177251881,-0.868664052164931,0.706252958531545,-1.229  
96164712864,0.218711467221959,0.354218472289538,-0.901535518503264  
"Gm48297",1.46449408923973,1.61864018566495,1.78701253725103,0.9057799  
83029616,0.365052317928434,0.510016487171725,1.08985022650085  
"Gm10608",2.75136774071291,-0.107156637202944,1.15615039125428,-0.0926  
839951043844,0.926154612330359,0.954712466249458,-0.00496618145534807  
"Gm47867",0.923496819149764,-1.7455374061988,1.7695945600376,-0.986405  
273624778,0.323934278266021,NA,NA  
"Gm48789",136.514377545817,0.701314200372648,0.435357426464081,1.61089  
293013475,0.107203061216452,0.207654012278798,1.10238315863642  
"Olfr1248",0.368224661843774,0,4.78471990595267,0,1,NA,NA  
"Gm21089",0.151553764893876,1.34557185166001,4.78471990596623,0.281222  
70020073,0.778539594700064,NA,NA  
"Olfr1328",10.1510871922692,-0.41140423619832,0.521280508412365,-0.789  
218529293011,0.429984293987144,0.572705359939978,-0.229310097877108  
"Gm18292",0.14728986473751,0,4.7847199059615,0,1,NA,NA  
"Gm47933",1141.90577378952,0.782069330690036,0.337618847581759,2.31642  
675251016,0.0205349794682036,0.0586168827632991,2.21852150492866  
"Olfr789",4.74904424819217,1.38367927666924,0.780553948987858,1.772688  
84292169,0.0762802808801032,0.160167232026734,2.53425952765496  
"Olfr1065",0.129760958611734,-1.02658459307058,4.78111853127429,-0.214  
71640712429,0.829988429881525,NA,NA  
"Gm3953",77.1191888941067,1.13284307502777,0.465977972110648,2.4311086  
4210289,0.0150527002376413,0.0462785048340853,3.48131477349398  
"Gm48401",147.812968245687,0.488610530287274,0.286170825845813,1.70740  
860408508,0.0877461322496105,0.178513573309986,0.841920231197396  
"Gm19790",0.14705942516571,0.80915769763842,4.78471990596623,0.1691128

66278641,0.865707864865751,NA,NA  
"Gm48670",20.1948863154892,0.240215846664937,0.791107372851445,0.30364  
5061224887,0.761398317533863,0.84562225992682,0.0402799985981841  
"Gm6885",0.081018275684709,0,4.78471990596022,0,1,NA,NA  
"Gm48467",0.0721532113593249,-0.544048378937457,4.78471990596623,-0.11  
3705376621746,0.90947135024012,NA,NA  
"Gm48537",0.16031083688631,1.32421143887331,4.78471990596483,0.2767584  
02769302,0.781965623716795,NA,NA  
"Rpl32l",9.15325974321857,1.9580577651798,0.75287835162677,2.600762475  
03858,0.00930168321733593,0.0320040182574136,6.73942690849021  
"Gm50490",0.271061280032272,-0.554488255159564,3.97916905438063,-0.139  
347750141235,0.889175358766043,NA,NA  
"Btbd8",315.187329956891,-0.032608358122644,0.161815295627969,-0.20151  
5919716355,0.840295182622346,0.89775756004222,-0.00351698179605957  
"Gm18655",0.772826518263766,-1.0028798563096,2.04852530007179,-0.48956  
1860072928,0.624443970760533,NA,NA  
"Gm2594",0.488391043045508,-2.6189679107753,2.95369156668905,-0.886676  
164942652,0.375253274420479,NA,NA  
"Gm49380",19.3260611116509,0.148847729835815,0.624071673410509,0.23851  
0632957225,0.811485069381623,0.879810136779931,0.0190598250537785  
"Gm47324",4.66958421679334,0.754657892850899,1.00108177501046,0.753842  
404975375,0.450943857811848,0.591530095506957,0.396227630377438  
"Gm47993",0.114810471722162,0,4.78471990596601,0,1,NA,NA  
"Gm47356",132.644436593185,0.674651800863214,0.273037464213242,2.47091  
293060175,0.0134768627194255,0.0426370062150508,2.12854850113951  
"Rps2-  
ps12",0.369127461434996,2.1082301581284,3.76882546489487,0.55938651915  
9811,0.575897959673051,NA,NA  
"Gm6581",0.570098727951929,1.89628917550849,2.53290719714749,0.7486611  
34385048,0.454061474610208,NA,NA  
"Olfr912",17.9667974462619,1.02414040086814,0.572731716809734,1.788167  
77700539,0.0737489433413646,0.156350646653249,1.9004502920136  
"Olfr1245",4.91226210318015,1.85883042271939,0.815541650022379,2.27925  
872660014,0.0226516899559893,0.0633935195581856,5.12738601202706  
"Gm18996",5.25958550976854,0.230360401640416,0.740706228431746,0.31100  
1032255587,0.755799836893429,0.841657731438008,0.0397099503840655  
"Gm8031",0.352171736082251,-0.557480235213041,4.78471990595481,-0.1165  
12616447878,0.907246287717828,NA,NA  
"Gm47504",0.253194890330652,-1.62202515170141,4.75997403271875,-0.3407  
6344546253,0.733281671419838,NA,NA  
"Gm47103",251.264656128836,0.640997950848446,0.372714001929278,1.71981  
183301526,0.0854666509756316,0.174971520445492,1.11734407762964  
"Gm18251",0.0902354583034714,0,4.78471990596623,0,1,NA,NA  
"Gm48443",1949.62817370396,0.379503764896975,0.311972280950197,1.21646  
629547052,0.223807342827954,0.359900665604903,0.387825225346836  
"Gm5366",0.403057663498185,-1.65579816387983,3.7346763818828,-0.443357  
869482944,0.657506904258127,NA,NA  
"Gm38431",407.138968494707,0.222440937310478,0.309757224322517,0.71811  
3799595758,0.472687122156237,0.610478294069122,0.109777392064117  
"Gm48848",0.194076619025998,2.23399183648434,4.7531634136379,0.4700010

5867905,0.638354261191364,NA,NA  
"Gm17853",0.35871640656965,2.38088810241042,3.72537215752024,0.6391007  
39936607,0.522757398598893,NA,NA  
"Gm5055",0.140527846673683,0.900315262708532,4.78471990596623,0.188164  
674297005,0.850747563646718,NA,NA  
"Olfr1238",1371.66999763159,0.817382152371101,0.424110395022899,1.9272  
8629612337,0.0539439604714413,0.123161515371448,1.71180964452309  
"Gm48141",4.02016762550063,-0.897907304825078,0.831898877065003,-1.079  
34669655158,0.280433203410142,0.424261840478813,-0.769869733260946  
"Gm18015",0.226585933651733,-0.0794575664456885,4.78471990595797,-0.01  
66065241032703,0.98675051979506,NA,NA  
"Gm8162",64.7810365390958,-1.03956716386216,0.534706054581431,-1.94418  
438870293,0.0518732196603344,0.119610221965137,-2.20753851722381  
"Gm48128",2053.74936611961,0.347110703085719,0.312156947584329,1.11197  
494008025,0.266148925249213,0.407905340709728,0.311261158113935  
"Gm18891",0.194184722355698,-0.556369959838074,4.78471990596496,-0.116  
280570393361,0.90743018372593,NA,NA  
"Stmn1-  
rs1",0.183577032853296,-1.08878216786948,4.77974554179357,-0.227790822  
408701,0.819808861807597,NA,NA  
"Gm47364",4.12003773957487,0.442704982456603,0.919806434356916,0.48130  
2332665374,0.630301639426769,0.746001054118195,0.129725073249162  
"Gm47355",200.082212742641,0.618795856484277,0.302377247423905,2.04643  
656808207,0.0407134373473711,0.0992536385845264,1.42946588967878  
"Olfr1192-  
ps1",112.053144421254,0.816240877557682,0.305696234932902,2.6701044510  
3074,0.00758276546001955,0.0273641978418399,2.93725893342681  
"Gm3365",70.547108050599,-0.21325394380773,0.294961321703753,-0.722989  
518001664,0.469686324065563,0.607698276793034,-0.106216836687159  
"Olfr157",0.397607852077303,-1.06339314757299,3.82160344879058,-0.2782  
58370294679,0.780814030295981,NA,NA  
"Gm4977",0.365303630053236,1.81787243430602,4.71642116280665,0.3854347  
12370818,0.699915368680899,NA,NA  
"Gm48348",383.759514807534,-0.625133276332335,0.398814501067345,-1.567  
47880194751,0.117002817302103,0.222212120902214,-0.940277247570744  
"Gm31848",1.21305999232248,0.89534592271276,1.70071357741862,0.5264530  
92749301,0.598573435057632,NA,NA  
"Gm46142",0.194352310240467,-1.04586252854964,4.78096622840777,-0.2187  
55472970146,0.826840534160169,NA,NA  
"Gm7435",15.3250190270321,-1.05714144259591,0.747391593642974,-1.41444  
11732585,0.157232408242967,0.277893174032032,-1.35368917987105  
"Gm6983",1.09974175520848,-3.2810966007094,1.8603746905106,-1.76367514  
428444,0.0777866881972407,NA,NA  
"Gm47934",1.77394733111464,3.33669224214069,2.10210802105439,1.5873076  
971882,0.112442972791362,0.215512934580358,5.12093619934171  
"Gm8543",0.094259034989067,1.3363445685458,4.78471990596623,0.27929421  
0488573,0.78001904894698,NA,NA  
"Rab7-  
ps1",0.902823960499181,0.305060169642035,2.12738683436875,0.1433966614  
41009,0.885976919511843,NA,NA

"Gm49373",37.224212850001,0.0696081893874232,0.51198022006586,0.135958  
747348616,0.891853892916419,0.933056135863301,0.00482314537899478  
"Gm47932",221.78295000097,0.96901995037483,0.36748987824291,2.63686160  
557138,0.00836769623687855,0.0294606972240263,3.41550287623049  
"Gm9662",0.120701025406302,-0.999956691173236,4.78169649435351,-0.2091  
21740025541,0.834353203805696,NA,NA  
"Gm3776",21.0680168617008,-2.39970337866205,1.13062893558208,-2.122449  
99499028,0.0337999676459132,0.0861817404420055,-5.88238557678683  
"Gm47145",1.76608688307085,0.830409084370873,1.59916291832815,0.519277  
351202606,0.603567345087337,0.724786357979485,0.267290702749023  
"Olfr1246",2.44996377921956,1.81000323572657,1.13184617488272,1.599160  
09427175,0.109785034719226,0.211562675184049,2.81135854380773  
"Gm19219",0.21000357670314,-1.68827967326331,4.75824391397549,-0.35481  
1502685823,0.722730810441824,NA,NA  
"Gm48850",16.2633101246628,-0.0872537058434893,0.46593830548369,-0.187  
26450437019,0.851453252049569,0.905461440330652,-0.00866521669357474  
"Gm7780",0.130421494284346,0.877153969044063,4.78471990596623,0.183323  
995193597,0.85454380798987,NA,NA  
"Gm48811",5.22171100394105,2.25071232734124,1.08411994091256,2.0760731  
7456655,0.0378871837586898,0.0940451061651094,5.32064063584362  
"Gm47147",567.476384675282,0.456433189189574,0.278795940306678,1.63715  
866410212,0.101597321523411,0.1997322620552,0.735212310945054  
"Gm18225",1.99425371047966,0.730287083794769,1.38608367771741,0.526870  
848805752,0.598283278714625,0.720348732146336,0.23954864801951  
"Gm7904",0.850651075164471,-2.51046284610456,1.87228068658855,-1.34085  
816517118,0.179966507143826,NA,NA  
"Olfr896-  
ps1",0.696558680788839,-0.510911066686099,1.72217855051304,-0.29666556  
1497034,0.766721851898403,NA,NA  
"Gm47102",423.717846191223,0.559422240978996,0.321570671820559,1.73965  
566515084,0.0819194985663279,0.169309559364666,0.993548739985717  
"Gm48805",0.360334288837597,0.100756692344553,3.8499626773395,0.026170  
8231452727,0.979121087665632,NA,NA  
"Gm40020",9.58533778282532,-0.892988853384593,0.553373463107492,-1.613  
71824440221,0.106588554776768,0.206710129404956,-1.40774139073149  
"Gm47135",7.29926621123706,-2.43741213359133,1.02104509847158,-2.38717  
382536768,0.0169784614107921,0.0506651424223484,-7.26962344380662  
"Gm8899",58.2480479762167,0.632596611046069,0.39137477039143,1.6163448  
9216917,0.106019765898536,0.205877461884435,0.999802580004972  
"Gm7692",0.181096163634151,-0.530311372532118,4.78471990596434,-0.1108  
34360830832,0.911747697200723,NA,NA  
"Gm5425",0.208175108543187,-0.27756862966097,4.77517087008188,-0.05812  
74758983045,0.953647088787031,NA,NA  
"Gm6477",4.66120740023657,0.592626394356934,0.860750239712431,0.688499  
830746402,0.491138076836781,0.627577837483685,0.276097271893198  
"Gm5040",0.140085307184288,1.31677313035223,4.78471990596528,0.2752038  
06331603,0.7831596628098,NA,NA  
"Gm47617",0.181926647221285,0.292918061073293,4.78471990596623,0.06121  
94792652425,0.951184416617698,NA,NA  
"Gm48836",32.9977668011299,-0.313605005923225,0.351991217998001,-0.890

945540365741,0.372958387276522,0.518276860887864,-0.20611554133668  
"Gm47366",0.127715112918017,0,4.78471990595319,0,1,NA,NA  
"Gm47928",0.121821870984685,0,4.78471990596557,0,1,NA,NA  
"Gm47377",7.48376572514099,0.790945391569902,0.550418564347199,1.43698  
894405564,0.150721135046508,0.269092637225236,1.03827368518513  
"Gm6150",0.408659267705705,-0.555624993144303,3.64926195828683,-0.1522  
56812335047,0.878984386471165,NA,NA  
"Gm2395",0.690366053198937,2.00041471792516,4.49290572801221,0.4452385  
24693062,0.656147388851964,NA,NA  
"Gm48793",439.227658484885,0.604454888317956,0.359778981534349,1.68007  
282065266,0.0929431482773934,0.186632904748982,1.01464502812622  
"Gm7370",0.138472133334655,0,4.78471990596623,0,1,NA,NA  
"Gm48082",904.479485238049,0.522976829250534,0.30731881063327,1.701740  
37890122,0.0888040474187603,0.180163862087883,0.896323971992214  
"Gm48177",271.726738219626,0.987179082836914,0.337577001906413,2.92430  
786831442,0.00345223122012936,0.0150585244586314,4.142016893163  
"Gm4478",0.360434779522028,-1.18922690174837,4.77640519080384,-0.24897  
9484411838,0.803376650861065,NA,NA  
"Gm5182",14.0842434234753,-5.63076950337454,1.8272901264088,-3.0814863  
0696143,0.00205969949857403,0.0102188348150627,-25.8087598989774  
"Gm47495",8.48270718826303,0.834950144075955,0.487081087742881,1.71419  
126114111,0.0864936053162356,0.176444059055865,1.44843093028542  
"Gm7001",0.10500178835157,-0.544048378937456,4.78471990596623,-0.11370  
5376621746,0.90947135024012,NA,NA  
"Gm47844",10.1453340632689,3.52068111202825,1.04729414315163,3.3616927  
3460599,0.000774662731895744,0.0048318534697707,18.7741205531012  
"Gm8942",0.380727298024483,-0.0655703646783648,4.60743059050092,-0.014  
2314384102824,0.988645338299584,NA,NA  
"Gm5781",0.43880608559465,0.31690616649794,3.05846488582879,0.10361608  
7915969,0.917474020076721,NA,NA  
"Gm8873",0.814679605784741,-2.25944653729434,2.96049805118902,-0.76319  
8116744877,0.445345251763599,NA,NA  
"Gm48827",0.273728052489825,2.372556188488,4.73989883908945,0.50054996  
2991147,0.616687884908953,NA,NA  
"Gm8290",0.280904781143772,-1.48312883357418,3.95973141927933,-0.37455  
2886681418,0.70799301725176,NA,NA  
"Gm48018",0.0985019052104216,0.904334223467223,4.78471990596623,0.1890  
04631669155,0.850089186672486,NA,NA  
"Gm5176",41.5121229450061,0.238920446044594,0.415634137735091,0.574833  
547952869,0.565403875551221,0.692939272146326,0.0876391050307793  
"Gm48465",0.28176276772211,-0.0638402825561718,4.78471990595701,-0.013  
3425328568743,0.989354514889623,NA,NA  
"Gm8112",0.133536145887984,2.03151963706708,4.76375456077059,0.4264534  
64625697,0.669777450222566,NA,NA  
"Gm18119",0.278567338264832,-1.05527270941762,4.77994336758294,-0.2207  
70964897695,0.82527077242241,NA,NA  
"Gm48461",1.05364059519601,2.9793093121321,1.91846854380744,1.55296229  
471623,0.120432142795427,NA,NA  
"Gm47967",554.439476866268,1.18623340794476,0.335948912690512,3.530993  
44315353,0.000414002010520349,0.00297809999653782,6.89969075375358

"Gm2436",57.5980444533156,1.11640317401999,4.16893687977478,0.267790855610244,0.788860309906663,0.863821089664165,0.163429818290611  
"Lilr4b",1313.30246854989,-0.845153532239686,0.452218347967485,-1.86890588592494,0.0616359092914502,0.136302252394771,-1.68428992218918  
"Gm9045",0.16327743838335,1.36557869232066,4.78471990596623,0.285404102885495,0.775334564553793,NA,NA  
"Gm48808",28.9606300269374,0.415030282813716,0.526293342136188,0.788591170713156,0.430350993037306,0.572841593544606,0.231232483340672  
"Gm47056",950.234155455877,0.661072982371759,0.322137959455824,2.05214245315419,0.0401558201902519,0.0981546976999415,1.53448954593151  
"Gm5136",0.23600181438732,-0.12042320944911,4.78010013576873,-0.0251926122944585,0.979901329622642,NA,NA  
"Gm47402",0.0983898136351889,-0.544048378937457,4.78471990596623,-0.113705376621746,0.90947135024012,NA,NA  
"Gm48774",429.16146244038,0.628038431881116,0.28445244166541,2.20788553687246,0.0272522533029781,0.0731806135382821,1.64221042650539  
"Gm5175",0.0767631468251098,-0.0556179938800324,4.78471990596623,-0.0116240856253007,0.990725530406669,NA,NA  
"Gm48269",527.53806000176,0.687449745211539,0.35220014836839,1.95187238959505,0.0509533570756611,0.118089689321436,1.468606359311  
"Gm21321",70.2601309221223,1.36131883714483,0.662051301895419,2.056213518873,0.0397619397692828,0.0974579888901918,3.16960476593983  
"Gm8249",0.100304366698042,0.852812576479726,4.78471990596623,0.178236677013491,0.85853710676835,NA,NA  
"Gm47466",2.77011729331325,0.648161217638933,1.19565446350487,0.54209743485501,0.587751385736923,0.711225502333428,0.220871135186379  
"Gm47809",0.369995884085105,1.52425036294077,3.77221110206379,0.404073452333262,0.686158706299459,NA,NA  
"Gm9004",0.0856580420403585,-0.0755210980623838,4.78471990596623,-0.0157838075261655,0.987406866551268,NA,NA  
"Gm48587",1.34907422140052,-1.91702437989392,2.32486789593819,-0.824573466407783,0.409613790540111,0.553283663869143,-1.13465692920451  
"Gm35412",0.429688053560647,0.0878269660591697,3.21317975269755,0.0273333497714956,0.978193857527924,NA,NA  
"Gm8960",0.855065078761153,-1.95289244682681,1.98953840776854,-0.981580671778619,0.326306473401196,NA,NA  
"Gm47924",153.977099881454,0.208410444069249,0.28880221649134,0.721637273429644,0.470517516574011,0.6084864719878,0.103534265146515  
"Rps7-  
ps2",2.47908178163561,1.96986612383971,1.30087331755364,1.51426437706029,0.129958799664855,0.24002431333384,2.81102861547441  
"Gm18039",0.0804673502708677,-0.544048378937456,4.78471990596623,-0.113705376621746,0.90947135024012,NA,NA  
"Gm47628",291.198336757298,0.880392544112682,0.349724845616906,2.51738632569753,0.0118229113638415,0.0385941948388049,2.86537259284031  
"Gm19056",6.60571911786117,-0.26787308162573,0.801633551328884,-0.334159019643915,0.738259565857889,0.829133403323375,-0.0501925086617101  
"Gm48886",0.0842630680419151,0,4.78471990595953,0,1,NA,NA  
"Pbld1",5123.69545546366,1.94787521084668,0.608476141294894,3.20123514900916,0.00136839809252122,0.00749256557370926,9.53259742678837



"Gm47247",0.593575836144352,-1.44356348900189,3.15052121854366,-0.4581  
98307157944,0.646809975982219,NA,NA  
"Gm9029",0.141573715383499,-0.548276959850055,4.78471990596623,-0.1145  
89144323033,0.908770784601822,NA,NA  
"Gm40692",0.235925117602625,1.99365968996951,4.75776825048743,0.419032  
534795123,0.67519235504883,NA,NA  
"Gm47526",0.283387651203452,-0.0726533974792637,4.78471990595447,-0.01  
51844619763109,0.987885017781098,NA,NA  
"Gm6218",0.487696767726435,-0.492986543232772,2.36474630409301,-0.2084  
73332796625,0.834859402548062,NA,NA  
"Lilrb4a",2336.68224227718,-0.861779932078635,0.445983967070417,-1.932  
31146343556,0.0533210743672576,0.12210216455924,-1.81223458055907  
"Gm47611",642.073752594539,0.51267922569787,0.343375462779063,1.493057  
25443679,0.135422200449916,0.247701522381816,0.715459648153618  
"Gm48777",0.846206800961511,1.69624334176854,1.79793195538358,0.943441  
344756932,0.345455203899004,NA,NA  
"Gm18777",0.087583724926668,0,4.78471990595887,0,1,NA,NA  
"BC024063",83.8686079638343,-0.504262299623032,0.225129202498717,-2.23  
987956260764,0.0250987427861532,0.0686559001012877,-1.35074130413564  
"Gm8188",4.88632541776387,0.270840654351954,0.769133042335949,0.352137  
587964468,0.724735080324107,0.818707102906109,0.0541759545908485  
"Gm48851",23.8022950412423,2.28038911844478,0.907920963817502,2.511660  
38600597,0.0120164668107008,0.0390234959818527,7.39665042648729  
"Gm47053",0.266259925189574,1.37163117290883,4.7847199059562,0.2866690  
63156941,0.774365727811179,NA,NA  
"Gm47630",5.24351246719538,0.994086355799494,0.710889684926405,1.39836  
936289546,0.162002178367942,0.284080419357564,1.2510556052617  
"Gm48826",0.24205665496788,0.0420329587764416,4.78270374517094,0.00878  
853489908966,0.992987853959815,NA,NA  
"Gm2412",2.0019466946208,0.955204420016311,1.27094996932952,0.75156728  
6728225,0.452311322303664,0.592846776894673,0.499399305963847  
"Gm35405",9.05725208201168,1.42048695166472,0.661982336745216,2.145807  
93597736,0.0318883052285602,0.0823645321148315,3.54638824943343  
"Gm8274",1.96197061517412,-1.20629997989768,1.61638507853057,-0.746294  
924347058,0.455489276864992,0.59560927639418,-0.625068947230171  
"Gm48448",0.207495325450404,0.881018575307314,4.78471990595396,0.18413  
1692685083,0.853910144362487,NA,NA  
"Gm18730",0.167507257746156,0,4.78471990596583,0,1,NA,NA  
"Gm18726",0.316130118728498,-0.0638133387501825,3.90910024223596,-0.01  
63243034959068,0.986975668737552,NA,NA  
"Tyms-  
ps",0.142968694610045,-0.070701814982138,4.78471990596623,-0.014776583  
8694084,0.988210420908136,NA,NA  
"Gm48786",578.880612302274,0.858980236168756,0.268460414197243,3.19965  
324771363,0.00137593016950652,0.00752113441128069,4.20044625366531  
"D630033A02Rik",431.496085645123,-0.430684589473568,0.297586919845071,  
-1.44725645098175,0.147825111242467,0.264989796727555,-0.5719766799653  
35  
"Gm17823",42.1131700440174,0.382736972061191,0.470993547396368,0.81261  
6168898586,0.416438158338244,0.559748463482634,0.222089928705561

"Gm49325",10.9371658473718,-6.30708893153615,2.92871085976522,-2.15353  
759163571,0.031276453022073,0.0811805485921697,-15.8376024136081  
"Gm8689",0.107878335025003,0,4.78471990596623,0,1,NA,NA  
"Gm17980",0.0907345448979459,0,4.78471990596623,0,1,NA,NA  
"Gm47874",0.249088317748346,-0.544604885332886,4.78471990596556,-0.113  
82168570701,0.909379147601189,NA,NA  
"Gm48460",0.202003140513976,2.71935445600396,4.72018298825892,0.576112  
083528995,0.564539424448854,NA,NA  
"Gm6906",0.0868375488903392,1.37274638074698,4.78471990596623,0.286902  
140088756,0.774187251794266,NA,NA  
"Gm29783",0.281711312252418,-0.548987185228749,4.78471990596437,-0.114  
737580468276,0.908653125712401,NA,NA  
"Gm19989",0.448235511327416,3.73552419747228,2.73811427793253,1.364268  
91586602,0.172482945232948,NA,NA  
"Gm8153",21.4279332427903,0.166912872090243,0.448943414374953,0.371790  
445623598,0.710048877880142,0.807543923291356,0.0356789335366679  
"Gm48454",0.210513360755985,-0.545131380884105,4.78471990596562,-0.113  
931722566337,0.909291918318129,NA,NA  
"Gm47325",56.2480801303118,0.677166668714724,0.357201016515011,1.89575  
79553424,0.0579920578551404,0.130271253892266,1.38015805938769  
"Gm47529",0.0799682967623991,0,4.78471990596046,0,1,NA,NA  
"Gm48132",665.830880306451,0.490211903280356,0.252363424362443,1.94248  
395748631,0.0520785401828194,0.119958532592526,1.03954785128499  
"Gm48507",0.637717918338866,-0.311085669745239,4.26445512292298,-0.072  
9485152916822,0.941847087134122,NA,NA  
"Gm4178",0.124747223766947,0,4.78471990596076,0,1,NA,NA  
"Gm49376",26.7394160721141,0.227030719265301,0.281749921758027,0.80578  
8047246665,0.420365071146936,0.563356805087839,0.130279783519142  
"Gm8170",16.8278901232822,0.358878637814437,0.461074091402195,0.778353  
510870745,0.436360637378767,0.57847156021289,0.196437926716838  
"Gm8701",0.52303777676064,-3.02434570581416,4.73018673503272,-0.639371  
313486472,0.522581406119863,NA,NA  
"Gm9466",0.166288741857701,1.37411825700517,4.78471990596457,0.2871888  
60374504,0.773967715358964,NA,NA  
"Gm48106",5.19787404055498,0.897993467766283,1.19206652043191,0.753308  
185721817,0.451264740988497,0.591871378971728,0.470966981858735  
"Gm47722",0.121476062291212,0,4.7847199059656,0,1,NA,NA  
"Srp54b",1057.72192769168,-1.1454415735648,0.353391733314943,-3.241280  
04585774,0.00118994223204224,0.00671728246680935,-5.73072620737183  
"Gm3619",0.495016468230968,-0.0545088746065592,2.61663209603039,-0.020  
8316922693308,0.983379916445187,NA,NA  
"Gm6714",0.149065916272118,-0.546075516111099,4.78471990596623,-0.1141  
29045553989,0.909135497629608,NA,NA  
"Gm5779",0.522020339558537,-2.40674839396353,2.98797368362288,-0.80547  
8444189433,0.420543640525137,NA,NA  
"Gm46209",1.57260799494844,-1.0281317241903,1.87052139447781,-0.549649  
807388235,0.582559589513105,0.706829301576012,-0.356726836866126  
"Gm19801",0.695377327910339,0.919479972377292,1.92673011179581,0.47722  
3025035038,0.633203316964837,NA,NA  
"Gm4928",0.133147961005405,-0.549849294833687,4.78471990596623,-0.1149

1776021164,0.908510307743308,NA,NA  
"Gm47968",199.675629875038,0.657820978261864,0.296533163075744,2.21837  
237845075,0.0265294528509477,0.0717636538179384,1.73294855085331  
"Gm47632",141.084155628844,0.646769452691436,0.369101321127481,1.75228  
159768101,0.0797253987444322,0.165935719974268,1.16169805350998  
"Gm46199",0.0882949522621329,-0.0669882571434227,4.78471990596623,-0.0  
140004552951768,0.988829617799846,NA,NA  
"Gm6627",9.05996392623793,0.504963482469912,0.562026159904231,0.898469  
712790517,0.368935185143544,0.513894716382971,0.336172806490009  
"Gm47626",546.867465293768,0.420976751679815,0.315726027320301,1.33336  
093717968,0.182413385000561,0.310451991845897,0.492427454022824  
"Gm32899",14.2013181671892,2.14493193839323,0.572976190643178,3.743492  
26620656,0.000181480190792598,0.00156917993794859,13.850259078299  
"Gm7530",1.1668856201609,1.25693410208217,1.67159089764662,0.751938828  
963339,0.452087846117088,NA,NA  
"Gm5750",0.0837058623428614,-0.544048378937457,4.78471990596623,-0.113  
705376621746,0.90947135024012,NA,NA  
"Gm48450",0.0789318165836824,0.4.78471990596069,0,1,NA,NA  
"Gm2398",0.258759273261787,-0.969367891408197,4.03721605449861,-0.2401  
08004704887,0.810246528853483,NA,NA  
"Gm48280",0.582338239202368,0.780720036011052,3.03701098562915,0.25706  
8558429767,0.797125848818957,NA,NA  
"Gm48333",3.41593806914056,-0.463045364711956,1.24292868919938,-0.3725  
43790110936,0.709488014663684,0.807368060385607,-0.0990804236081363  
"Gm47340",7.98846608215182,-1.79043658503557,1.04691712733634,-1.71019  
896253962,0.0872290874983775,0.177647038650863,-3.09379676094642  
"Gm7476",0.0825495477434125,-0.0532936413360363,4.78471990596623,-0.01  
11382990819552,0.991113106883137,NA,NA  
"Glipr1l3",0.854261857010743,1.16228270677369,1.95226156028023,0.59535  
1939730275,0.551608243899671,NA,NA  
"Gm7775",2.57471115810744,0.134595699744295,1.09375104393244,0.1230588  
08026709,0.902060529721509,0.940001935145635,0.00832788617314907  
"Gm5173",26.1294166259247,0.03723306590404,0.598066467838803,0.0622557  
322743523,0.950359180583816,0.969299749072722,0.00116097824092876  
"Gm2628",6.61637075581707,1.83819279286221,0.624573496183828,2.9431168  
6950159,0.00324925730783165,0.0143464716911462,7.80175204449054  
"Gm32687",274.743670962443,0.0665982424449028,0.225762442898296,0.2949  
92566477963,0.767999558263321,0.849936453053083,0.0108284542135014  
"Gm17849",1.75556275030095,3.03110921815244,1.38884129273342,2.1824734  
2875788,0.0290746102196032,0.0767840647517029,7.78012429095999  
"Gm19688",0.138509423504925,1.31437652053578,4.78471990596537,0.274702  
91811587,0.783544489052939,NA,NA  
"Gm5654",0.096882060110965,-0.0625273817130263,4.78471990596623,-0.013  
0681383533148,0.989573430938676,NA,NA  
"Gm47647",0.188836449105197,-0.604072131370862,4.78471990596566,-0.126  
250259836045,0.899533828014615,NA,NA  
"BC106175",6.33102792666939,-1.60846221499158,1.02349508277788,-1.5715  
3878123775,0.116057553654632,0.220724501261453,-2.4301289817141  
"Gm48270",373.08495673931,0.805794519671736,0.317433437708622,2.538467  
67211522,0.0111339088791879,0.0368901946116141,2.65896840455823

"Gm18042",2.46282074921738,0.328782543820938,1.03995842444058,0.316149  
69992459,0.751888884698438,0.838595668336011,0.0578744764879412  
"Gm7413",0.60824627873272,-0.537134154351641,2.36713288121189,-0.22691  
339325093,0.820491087374666,NA,NA  
"Gm20108",0.324287749308179,1.04691867874586,4.76412078335502,0.219750  
658380367,0.826065349155631,NA,NA  
"Gm47476",740.72101475706,0.9770099585466,0.299740379430371,3.25952065  
718778,0.00111600653163529,0.00640373612531635,4.93475389386867  
"Gm2446",104.557184549582,0.260177659846421,2.06882005977531,0.1257613  
77175876,0.899920815519865,0.938676966139543,0.0164650512795487  
"Gm19073",1.94095329037061,3.32594939100576,1.18423709972372,2.8085164  
6328398,0.00497703375925788,0.0198288116546813,13.0397812564213  
"Gm5512",15.6270584059546,-0.0537961848659724,0.525561843383477,-0.102  
359380809767,0.918471423690985,0.95000541340214,-0.00275907700036001  
"Gm48815",1.29107256253751,-0.00418897506253845,1.4007619435064,-0.002  
99049748028745,0.997613931787824,NA,NA  
"Gm8137",0.673957062640469,1.78717983037136,2.1930049465705,0.81494564  
4863323,0.415103424068406,NA,NA  
"Gm18041",0.0837058623428615,-0.544048378937457,4.78471990596623,-0.11  
3705376621746,0.90947135024012,NA,NA  
"Gm18755",0.333923374840332,-0.0404487505152046,3.88436148140305,-0.01  
04132302590423,0.991691594502659,NA,NA  
"Gm4798",0.101212894825143,0,4.78471990596623,0,1,NA,NA  
"Gm48524",0.121476062291212,0,4.78471990596623,0,1,NA,NA  
"Gm45925",2.89520955242028,-0.292121031586252,1.04473076745063,-0.2796  
13696358432,0.779773897925599,0.857497366018682,-0.0449098611741164  
"Gm47600",0.0804673502708677,-0.544048378937456,4.78471990596623,-0.11  
3705376621746,0.90947135024012,NA,NA  
"Gm17794",0.258261737291943,-1.0731724952848,4.00281921262328,-0.26810  
4163160916,0.788619141370856,NA,NA  
"Gm46191",0.665252272816989,3.07513680956043,2.3933691185276,1.2848568  
9305303,0.198842296897757,NA,NA  
"Gm4898",6.28947705290325,1.14291302377753,0.874507731711682,1.3069215  
7694306,0.191239347209786,0.321032319802051,1.29859317971641  
"Gm8264",0.369591653339022,-2.15034195895967,4.74508858839406,-0.45317  
2141868787,0.650424790794846,NA,NA  
"Gm6331",1.03556831021884,0.158335651487602,1.7067973461726,0.09276769  
25691624,0.926088117893118,NA,NA  
"Gm48158",1.13772350570277,-2.48706206675441,1.7867339786343,-1.391959  
90925041,0.163934538494063,NA,NA  
"Gm8723",2.02148412451264,3.04761476269369,1.75465442815059,1.73687463  
115224,0.0824093021767227,0.170091638011065,5.39859946497146  
"Gm18029",12.8266878211748,0.205577852559816,0.509983847048496,0.40310  
6595923746,0.686869808495212,0.789843567235176,0.0485000028931119  
"Gm7940",0.260599297193405,0.397274627222408,4.78471990596441,0.083029  
8606878083,0.93382779618816,NA,NA  
"Gm19326",0.306485471372323,-0.120764868274555,3.92151620211988,-0.030  
795453097777,0.975432666604152,NA,NA  
"Gm47612",0.144259760394243,1.33585264487969,4.78471990596418,0.279191  
399106673,0.780097943835439,NA,NA

"Gm2027",4.06724260288371,-2.27799090667999,0.880261027015361,-2.58785  
841559271,0.00965746667770945,0.0329140509145217,-7.77673208849758  
"Gm48034",0.091991025955798,0,4.78471990596463,0,1,NA,NA  
"Gm30534",0.205697969597225,0,4.78471990595889,0,1,NA,NA  
"Gm4739",270.566712209955,-0.312000474037541,0.435653434397662,-0.7161  
66680675696,0.47388843417892,0.611588343236735,-0.153409342826523  
"Gm7422",0.113773715662023,-0.0778339418734208,4.78471990596623,-0.016  
2671887598618,0.987021233653317,NA,NA  
"Gm9118",0.345710946391139,0.390883170487547,3.81010560451382,0.102591  
164408795,0.918287455617672,NA,NA  
"Gm48464",0.278371714080305,2.01525003658283,4.76407261237959,0.423009  
93300273,0.672288013932997,NA,NA  
"Gm47006",0.415070210801096,0.874259355529025,2.61394435337398,0.33445  
98190855,0.738032606494464,NA,NA  
"Gm47098",0.133901069919421,1.31153272943329,4.78471990596623,0.274108  
569615099,0.784001188370802,NA,NA  
"Gm30232",1.75159827225082,-2.84725925968059,1.92129164882985,-1.48195  
057289438,0.13835344707461,0.251948772864551,-3.92503086772698  
"Gm47036",149.623294973704,1.258078386595,0.418951928875932,3.00291823  
448691,0.00267404265037528,0.0124198388749445,5.5210268973462  
"Gm18040",0.242184167462021,1.13644525454003,4.75577947012779,0.238960  
881529163,0.811135916085091,NA,NA  
"Gm47842",195.116896063262,0.757831525391648,0.373481287983455,2.02910  
172416782,0.0424479303383427,0.102569521611898,1.72574490080993  
"Rnf212b",42.6110441247195,2.2486348379492,0.606285731646373,3.7088697  
9616528,0.000208186442676865,0.0017469890354876,14.2785198391203  
"Gm19181",1.6742734532015,-2.03872244744402,1.96206751561276,-1.039068  
44755407,0.298772904001353,0.443170337179032,-1.65911451841176  
"Gm48108",0.315444648769608,1.80152417231845,4.74673758798676,0.379528  
91621349,0.704295135589588,NA,NA  
"Gm47726",0.240037458257656,0.994148295730616,4.7647866859572,0.208644  
869383256,0.834725480650792,NA,NA  
"Gm47961",0.76885238721521,-2.90030854879286,2.85095713589089,-1.01731  
047172919,0.309005756598194,NA,NA  
"Gm18514",2.55206441268807,0.219886548066753,1.04540971029778,0.210335  
283765559,0.833405998719936,0.893530746895486,0.0247536255117832  
"Gm18622",3.86338623295495,3.14714696150367,1.19594194707286,2.6315215  
1256715,0.00850034854325333,0.0297985968889524,11.0568524452065  
"Gm47331",246.319609421062,0.936757852921187,0.321195783262936,2.91646  
995924085,0.00354016812722205,0.0153459361383661,3.91274817248135  
"Gm18120",3.41425755818949,-0.518339357866865,0.810650513552219,-0.639  
411619682488,0.522555191870599,0.655859744518374,-0.218639852169035  
"Spata22",20.8035169544844,-2.35810526223052,0.88347345558729,-2.66912  
972576291,0.00760480717614267,0.0274119590456284,-8.4815761751807  
"Gm8768",0.182732806477027,0,4.78471990596015,0,1,NA,NA  
"Gm4303",0.140354312214306,2.03555724218554,4.76367631921753,0.4273080  
50711535,0.669154969740695,NA,NA  
"Gm48590",0.098505886328384,0,4.78471990596623,0,1,NA,NA  
"Gm47597",0.307195933220493,-2.06710007553563,3.84443970015173,-0.5376  
85654285083,0.590794084881907,NA,NA

"Gm21939",0.179109629130558,-1.01426515233699,4.78170720556784,-0.2121  
13604771948,0.832018406120339,NA,NA  
"Gm47254",0.804199565101942,-0.521654219821868,2.55063509541541,-0.204  
519345303257,0.83794767610832,NA,NA  
"Gm48417",191.357472971481,0.797683464373657,0.405016574971864,1.96950  
819711285,0.0488947622090038,0.114420316076711,1.72927933873453  
"Gm2654",0.162623893039905,-0.543054961700888,4.78471990596623,-0.1134  
97753760619,0.909635943815216,NA,NA  
"Gm5954",0.902637832491883,-0.999549553354033,2.26657160419171,-0.4409  
96239212343,0.659215719620483,NA,NA  
"Gm48143",1.60456481188587,-1.13150982465537,2.64626492114353,-0.42758  
7508572804,0.668951461935467,0.776058869034312,-0.28686817761981  
"9530050K03Rik",0.91665093157087,1.25193745190359,2.42695542814177,0.5  
15846907358391,0.605961338039059,NA,NA  
"Gm48620",0.209008410557653,-0.032420219068798,4.78471990595857,-0.006  
77578201148704,0.994593749513628,NA,NA  
"Gm47951",287.16856088634,0.536282111021553,0.391454496218522,1.369973  
05230129,0.170695313776434,0.295316524224749,0.654107331367531  
"Gm8700",1.10885428209868,-1.31110908226591,2.11993964383641,-0.618465  
287951889,0.536268672585938,NA,NA  
"Selenok-  
ps8",0.49045593084987,-0.543569740547741,4.52336115248936,-0.120169432  
027022,0.904348931977613,NA,NA  
"Gm6296",3.5617584237525,0.122935750107604,0.785056035690573,0.1565948  
72873583,0.87556414354629,0.922248915286347,0.00995043420202098  
"Gm9544",2.94230031946855,0.296780339755024,1.01282130413675,0.2930233  
97654512,0.769504267512589,0.850913327912409,0.0479137028234013  
"Gm18065",0.664796690107668,-0.543337062305557,2.17601566637582,-0.249  
69354343413,0.802824351675633,NA,NA  
"Gm47021",1.60748128082444,-0.120834780885904,1.32423513695361,-0.0912  
487348462022,0.927294951634644,0.955421526472854,-0.0055103858469522  
"Gm18262",0.188985266630747,-1.13159681796823,4.77805336180493,-0.2368  
32185051353,0.812786981687486,NA,NA  
"Gm46344",0.158641304388403,0,4.78471990596588,0,1,NA,NA  
"Gm48041",0.85109071116692,1.64961587155997,2.94119443892279,0.5608659  
69869079,0.574888910215704,NA,NA  
"Rps18-  
ps5",1.88317082996147,0.825113985692314,1.17522709015055,0.70208897719  
2154,0.482623676074471,0.620193530356556,0.394176509396145  
"Gm47217",0.278719505850856,1.39064042311975,4.78471990596535,0.290641  
970784114,0.771325156992283,NA,NA  
"Gm48541",947.25658993528,0.643973824883016,0.315191157972263,2.043121  
47912374,0.0410404141451857,0.0999008732837491,1.4834431961571  
"Gm47820",0.718589010092675,1.06319319114347,2.32790030788603,0.456717  
664215165,0.647873992680883,NA,NA  
"Rpl7a-ps1",1.08995397037687,0,4.15505937478912,0,1,NA,NA  
"Gm48928",0.0963525896306327,0,4.78471990596421,0,1,NA,NA  
"Gm3333",1.28406661015074,0.302824436864889,1.80515217069633,0.1677556  
28462101,0.866775531062817,NA,NA  
"A030003K21Rik",0.087583724926668,0,4.78471990595887,0,1,NA,NA

"Gm9279",0.86669697189427,2.68600327321212,2.34718117612072,1.14435276  
685858,0.252477368168984,NA,NA  
"Gm7712",0.331745617701287,0,4.78471990594854,0,1,NA,NA  
"Gm48528",5.85591080786718,-0.84333044943196,0.809426449784113,-1.0418  
8644892552,0.297464327488897,0.441800689928284,-0.688913630387444  
"Gm2614",0.656999639922206,-0.157461245772467,1.80111649222785,-0.0874  
242429359463,0.930334300073685,NA,NA  
"Gm47650",2.24157884065803,-1.02372937994072,1.20718561180762,-0.84802  
9805795815,0.396421371658694,0.540859555286629,-0.629179609250178  
"Gm9231",0.0886915477092957,-0.544048378937457,4.78471990596623,-0.113  
705376621746,0.90947135024012,NA,NA  
"Gm7511",33.5062809334133,0.186466502936144,0.477152290636461,0.390790  
333810242,0.695952220468353,0.79739073670252,0.0422179668869252  
"Vmn2r-  
ps95",0.23436652125529,0.894665834883893,4.78471990596426,0.1869839515  
09611,0.851673215866498,NA,NA  
"Gm47406",168.809993330022,0.392259302320871,0.253830097259472,1.54536  
166733566,0.12225880686263,0.229857226922597,0.576737642206383  
"Gm49383",21.1343712186418,-0.312984498446145,2.35950157716013,-0.1326  
48565051119,0.89447132240685,0.934784603939503,-0.0211074073962728  
"Olfr335-  
ps",0.0797239182051999,-0.0672437722356595,4.78471990596623,-0.0140538  
576044568,0.988787013113444,NA,NA  
"Gm9292",1.07206857720871,-0.64315447340277,2.67713454635728,-0.240239  
876728607,0.810144301547818,NA,NA  
"Gm9973",345.481883284812,2.78126324103742,0.377388059576312,7.3697701  
0920776,1.70922522761618e-13,1.66632367440301e-10,62.620784685059  
"Mylf-  
ps",0.166532122071654,-0.560351687628555,4.78471990596067,-0.117112746  
125533,0.906770709296371,NA,NA  
"Gm47954",0.183895944985656,-0.548966256455569,4.78471990596469,-0.114  
733206382932,0.908656592831353,NA,NA  
"Gm18032",0.641988724325113,-0.535252168682975,2.12167411339357,-0.252  
27821996982,0.800826021741092,NA,NA  
"Gm6988",0.212698790948953,-1.11345492327776,4.77949621871674,-0.23296  
491352319,0.815788651149609,NA,NA  
"Gm3742",0.0721532113593249,-0.544048378937457,4.78471990596623,-0.113  
705376621746,0.90947135024012,NA,NA  
"Gm48147",0.723208230190773,0.508011665044575,2.73877030541963,0.18548  
8963437092,0.852845535966787,NA,NA  
"Gm18442",0.151436880906852,0,4.78471990596595,0,1,NA,NA  
"Gm49330",0.113011384011284,-0.072090248281188,4.78471990596623,-0.015  
066764554242,0.987978915995132,NA,NA  
"Gm33312",0.48679309558063,-1.68376981212009,3.830304516361,-0.4395916  
31664775,0.660232902724851,NA,NA  
"Tes3-  
ps",4.03261578629652,-0.0657982289107906,0.746645273292373,-0.08812515  
29533559,0.92977720498348,0.956462801665501,-0.0029289016266974  
"Gm7446",0.620166222638822,0.39022722398032,2.50150067448531,0.1559972  
49155493,0.876035189532931,NA,NA

"Gm48551",169.371028138628,-0.11608284424453,0.362619738629842,-0.3201  
22794978422,0.74887524629189,0.836582999401546,-0.0207126086443982  
"Gm4811",0.133037321563944,-1.09148944917188,4.7792627781536,-0.228380  
296258487,0.819350606036027,NA,NA  
"Gm47969",0.716065019153929,-0.0492868204373265,2.01822415684552,-0.02  
44208851975896,0.980516889314019,NA,NA  
"Tubb2a-  
ps2",0.0876950093871303,-0.0501960486403321,4.78471990596623,-0.010490  
9063909344,0.991629621301542,NA,NA  
"Gm36128",2.27638242704746,-0.276836088223168,0.947644771257161,-0.292  
130655515476,0.770186728756417,0.851274060036913,-0.0445764673793293  
"Gm19001",132.709854197072,0.257349038383436,0.242248820083459,1.06233  
350608178,0.288084308613008,0.43214862666075,0.215912164839558  
"Gm49326",5.09355572913785,-2.23211461238535,0.840454088393878,-2.6558  
4360075035,0.00791102948928617,0.0282456057465852,-7.96154519870192  
"Gm8227",2.79680983552745,2.40056851561814,1.32368289508001,1.81355256  
953218,0.0697466382669654,0.149665539192759,4.55952512300459  
"Gm18113",9.96341269174997,0.499737900360661,0.498053938616766,1.00338  
108307822,0.315677027755701,0.460915881921571,0.387066854094229  
"Gm19220",3.32343921547276,0.965000368601955,0.885911577594499,1.08927  
391063361,0.276033114116648,0.419492880673921,0.838304239059587  
"Gm7695",0.0766347862399054,-0.0607377469090221,4.78471990596623,-0.01  
26941070956497,0.989871839945151,NA,NA  
"Gm47323",0.634893103530274,2.60978626846935,3.33241932163079,0.783150  
62319114,0.433538666554027,NA,NA  
"Vmn2r-  
ps102",0.0975972494408582,-0.0637686442709964,4.78471990596623,-0.0133  
275605519732,0.989366459998435,NA,NA  
"Gm20789",14.927295098616,1.37199820376301,0.644374204346282,2.1291947  
9785027,0.0332381471323769,0.0850718551833926,3.38095895522691  
"Gm48012",5.88324227244757,-0.504298059822815,0.693847472178062,-0.726  
81400458197,0.467339902786862,0.60574309808803,-0.252804271110184  
"Gm19195",2.42123871931446,1.05417123010344,1.60919528465225,0.6550921  
69457385,0.512408413397187,0.646579034715141,0.459681735931465  
"Gm47125",0.0778527997966675,0.4.78471990596551,0,1,NA,NA  
"Gm10054",0.391858027205576,0.429773869854466,3.2158071626766,0.133644  
167113787,0.893683957135817,NA,NA  
"Gm48111",539.348118074502,0.768710511689343,0.353665193292719,2.17355  
432840998,0.0297386215354392,0.0781144608241942,1.9598890090243  
"Gm9512",0.103140693152573,0,4.78471990596623,0,1,NA,NA  
"Gm36262",14.3587180424744,1.26617085743943,0.650005196643584,1.947939  
5918333,0.0514221917113551,0.118827215810413,2.6970513090015  
"Gm48415",389.796871934093,0.508282979307701,0.374870894113562,1.35588  
808650939,0.175134778627739,0.301365979497278,0.60964978987144  
"Gm48365",425.24828082524,0.649219475057787,0.37115986120582,1.7491640  
2045364,0.0802626714278607,0.166680324582003,1.16319194231407  
"Gm9194",22.327828423452,0.69302941874518,0.484701702529317,1.42980603  
354341,0.152772696932859,0.271938124323424,0.902449549332914  
"Gm8288",0.38554944766615,-0.0645512630294577,3.0943204965167,-0.02086  
12078490653,0.983356371536378,NA,NA



"Gm48643",2.58668532135574,-0.972236745197611,1.24169594852576,-0.7829  
90994173679,0.433632400572752,0.575755161482297,-0.53674543838746  
"Gm21941",0.746839410753448,1.63197761182842,2.5653606508218,0.6361591  
34703196,0.524672705545116,NA,NA  
"Gm49328",42.8606169328098,-0.657111217847736,0.259040725661843,-2.536  
71007201216,0.011189958382355,0.0370050557223808,-2.16629903454459  
"Gm47556",0.087583724926668,0,4.78471990595887,0,1,NA,NA  
"Gm3791",58.3072289145238,-0.0527618910304135,0.236710435128424,-0.222  
896345916429,0.823616180390073,0.886887296915317,-0.00633339840971379  
"Gm7664",0.316089500985846,0,2.68836107275757,0,1,NA,NA  
"Gm6722",10.653541666699,0.430851822470623,0.550756116331279,0.7822914  
89272298,0.434043287386362,0.576104562114315,0.237600175643016  
"Gm48392",0.323231556413873,0.880396595688164,3.85638209871622,0.22829  
5996908928,0.819416136402251,NA,NA  
"Gm49382",0.122232381030977,-0.0695821104122511,4.78471990596623,-0.01  
45425671261314,0.988397119192037,NA,NA  
"Gm7042",0.389363372247944,1.50438668620936,3.7024048033992,0.40632690  
537463,0.684502418880822,NA,NA  
"Gm49359",431.726145346322,-0.146929064763968,0.157615420684316,-0.932  
19980713847,0.351233275133017,0.496256985401708,-0.102947519913716  
"Gm30738",0.0983898136351888,-0.544048378937457,4.78471990596623,-0.11  
3705376621746,0.90947135024012,NA,NA  
"Gm48248",0.873746661877938,-2.17740081348542,2.34915687129918,-0.9268  
86084146957,0.353985683123498,NA,NA  
"Gm46350",43.390932395694,0.536120274300187,0.430321289113809,1.245860  
44860633,0.212815632624221,0.347215722162111,0.567112859008912  
"Gm48165",0.15939690278774,-0.548996508834806,4.78471990596623,-0.1147  
39529089309,0.908651581138408,NA,NA  
"Gm7045",3.89673695480074,-1.68535345497389,0.936438958707792,-1.79974  
726521367,0.0719005542068571,0.15310785396023,-3.16275566066676  
"Gm45965",0.215368317081206,1.36910195947407,4.78471990596623,0.286140  
460963428,0.774770543123699,NA,NA  
"Gm48676",0.303297064421196,0.870873163927536,3.91240277752161,0.22259  
2921396301,0.823852346151942,NA,NA  
"Gm16381",8.92284979316955,0.903500067935583,0.869856862835685,1.03867  
671399433,0.298955114470437,0.443373151437179,0.734855939304341  
"Gm7441",0.207469261283296,0.396419793208553,4.78471990596623,0.082851  
201533081,0.933969856103449,NA,NA  
"Gm49377",20.3826785968832,-1.55813698088696,0.496189833058632,-3.1402  
0335983555,0.0016883059311467,0.00882666956815008,-7.36995287376577  
"Gm19046",36.8001712444913,0.176318645204468,0.376705893266751,0.46805  
3854096768,0.6397460779902,0.753559221317701,0.0498889496660125  
"Gm9063",0.0804637491400704,-0.544048378937457,4.78471990596623,-0.113  
705376621746,0.90947135024012,NA,NA  
"Gm18960",0.311712421642419,2.0181017773629,4.7305003717977,0.42661486  
4971668,0.669659868823823,NA,NA  
"Gm48366",281.149627565264,0.586644973880223,0.330571079504145,1.77464  
0947902,0.0759571915160369,0.159729650580208,1.07606678787547  
"Gm49327",250.512386675556,-0.157835973839785,0.199250260374217,-0.792  
14939816565,0.428273569648659,0.571046931268898,-0.0884329520379633

"Gm7768",0.0767951242053907,-0.544048378937456,4.78471990596623,-0.113705376621746,0.90947135024012,NA,NA  
"Gm10095",0.27091926647247,1.99632953247713,4.76444829401533,0.419005393548869,0.675212190578828,NA,NA  
"Tmdd1",2.18311336401591,1.11396302786279,1.5008111439821,0.742240642554874,0.457941548101393,0.597733585813426,0.573256661895676  
"Gm46369",0.22330471260073,0.867573583342458,4.78471990595333,0.181321707517924,0.856115068295084,NA,NA  
"Gm48035",68.8404839712111,-1.05889448142428,0.289958429963637,-3.65188375987921,0.000260323719619093,0.00207006194336585,-6.54415505249457  
"Gm19238",0.273816771758697,1.37697647580064,4.78471990596017,0.287786224243845,0.773510382942713,NA,NA  
"Gm19786",0.240368511698349,2.08997018476339,4.75778134538012,0.43927411392976,0.660462928574919,NA,NA  
"Gm47441",1.35962618952814,2.62600283306226,3.54429001656621,0.740910822982368,0.45874751275118,0.598505119011209,1.3479803019698  
"Gm48691",10.3834310170993,-0.0201534698742568,0.493566107291285,-0.0408323618184807,0.967429539864389,0.980058507941553,-0.000405951487138335  
"Gm3379",3.83104153349915,1.04557013404891,1.10035496080716,0.950211678313275,0.342004705846564,0.486495123871054,0.75336297606873  
"Gm7240",42.6627794117243,0.430734824692811,0.309411076351083,1.39211184606741,0.163888531590497,0.28641199148082,0.538558078213819  
"Gm47446",0.755267241717656,-2.84809083059343,2.56460571552078,-1.11053750420855,0.26676747624095,NA,NA  
"Gm29689",5.99677877692138,-0.746473817533989,1.07395209274704,-0.6950718030863,0.487010304432163,0.623856226874441,-0.352212729594916  
"Gm7049",1.10857809490027,-1.78826151214824,2.17451033566197,-0.822374344614853,0.4108638761559,NA,NA  
"Adat3",50.0071163852934,-0.792687874546962,0.378682258928511,-2.0932796714319,0.036324196243171,0.0910102752669371,-1.8999007140708  
"Gm49329",35.952156512344,-0.174223112125188,0.394416686855108,-0.441723481616259,0.65868931549413,0.767716197830387,-0.0460532921641778  
"Gm46313",0.0804673502708677,-0.544048378937456,4.78471990596623,-0.113705376621746,0.90947135024012,NA,NA  
"Gm5626",16.3243106926314,-0.531891286717797,0.666249498020753,-0.798336491506413,0.424675247045091,0.567650508458571,-0.301183096250381  
"Gm47853",78.1226020820434,0.650662110843657,0.278374557967285,2.33736199024382,0.0194203697587448,0.0561557718457668,1.87366340780884  
"Gm49686",45.6084788647838,-0.279275006601332,0.377940903098487,-0.738938295145461,0.459944467094885,0.599618143593097,-0.142838624283058  
"Gm18259",0.344194725736596,-0.507147892793465,3.15943036822496,-0.160518775122868,0.872472432979798,NA,NA  
"Gm45930",0.339700445962948,-0.974946351568299,4.78131884448009,-0.203907412009105,0.838425852823156,NA,NA  
"Gm48418",253.381282570959,0.704543761971187,0.323051377315435,2.18090313629356,0.0291905817016652,0.07701731556415,1.80625645964926  
"Gm36501",0.625540110481587,0.316985171290382,2.59471417556059,0.122165737666229,0.902767760547244,NA,NA  
"Gm38699",32.2769833102175,-1.25063808483271,0.396722845182832,-3.1524

2265480414,0.00161921712120571,0.00853514339801809,-5.95749345950651  
"Gm48340",0.357407193239252,-0.846367794844781,4.7750147294334,-0.1772  
4925320706,0.85931260962245,NA,NA  
"B230303A05Rik",11.2609133451696,2.17344772449412,0.63839055360322,3.4  
0457375540207,0.000662674021595461,0.00428191464783333,11.852582062976  
6  
"Gm48411",0.714047353259734,0.444141816630158,1.9716253758889,0.225266  
83925942,0.821771695142439,NA,NA  
"Gm48635",1.0933376239139,1.75348913838427,1.70940784531766,1.02578746  
387959,0.304991776394255,NA,NA  
"Gm6562",0.227625126804237,-0.824337104813649,4.78279228344699,-0.1723  
5477853944,0.863158621584195,NA,NA  
"Gm9305",0.240464464677956,-0.529825036739243,4.78471990596084,-0.1107  
32717306855,0.911828300854418,NA,NA  
"Gm8598",5.94216297347316,-1.61094274660374,0.755284185744959,-2.13289  
616942637,0.03293324465828,0.0844799900469864,-3.98102708237197  
"Gm19340",1.54553366523104,3.07669188545637,1.54494273651412,1.9914601  
4459951,0.0464303226921856,0.109852982872495,6.79521962296684  
"Mrto4-ps1",0.461751683425916,0.3.10564500828054,0,1,NA,NA  
"Gm5628",63.4665260153219,-0.180640381184106,0.330985010961737,-0.5457  
6604740868,0.585226764811783,0.709050609600456,-0.0621092884207119  
"Gm5791",0.550685031122739,0.451441148447941,2.33884195921466,0.193019  
090780947,0.846944016944511,NA,NA  
"Gm18025",25.8325505959172,0.718082430753939,0.585033924320735,1.22742  
015616903,0.219664714457216,0.355437560372348,0.742788547996579  
"Gm48873",6.362789676823,1.36378736317072,0.558774238305962,2.44067687  
749048,0.0146597650128902,0.0454708124840472,4.21503665930253  
"Gm9237",1.04375003103218,1.40804776958999,1.75394824105214,0.80278752  
6241565,0.422097553099249,NA,NA  
"Gm8278",1.23808319859193,2.2946554343909,1.62306683387513,1.413777539  
22328,0.157427230351012,NA,NA  
"Gm49384",70.8665787103804,0.547667709838811,0.845792629775957,0.64752  
0078277206,0.517295404087482,0.650871298644513,0.23519225832928  
"Gm17872",0.0983898136351889,-0.544048378937457,4.78471990596623,-0.11  
3705376621746,0.90947135024012,NA,NA  
"Gm48119",1610.28442027968,0.781532125291493,0.362004109330057,2.15890  
401558655,0.0308576142791729,0.0803715954068012,1.97031630839845  
"Gm47688",0.131375587390002,0,4.78471990595286,0,1,NA,NA  
"Gm48472",0.727255614189401,0.246103612330378,2.40449042293696,0.10235  
1670849982,0.918477543208721,NA,NA  
"Gm9255",0.128620140399167,0,4.78471990596521,0,1,NA,NA  
"Gm21056",271.172155836795,0.737433037980984,0.580706408113216,1.26988  
961664293,0.204123952305047,0.336547338241485,0.803076717623232  
"Gm48017",0.645069108610784,-2.09712893445409,2.41812813892597,-0.8672  
53021333082,0.385803390820246,NA,NA  
"Gm4012",0.0721532113593249,-0.544048378937457,4.78471990596623,-0.113  
705376621746,0.90947135024012,NA,NA  
"Gm3325",39.4267922185855,-0.612743124367247,0.337325532873699,-1.8164  
741908128,0.069297663515878,0.14900373216063,-1.16653051050384  
"Gm46994",0.221019810384964,1.35295795228861,4.13578458019391,0.327134

531805129,0.743566134810136,NA,NA  
"Gm18955",0.845806645126653,-0.779491173402657,2.27120429707413,-0.343  
206101893534,0.731443414523912,NA,NA  
"Gm6129",0.399579584933026,-0.0760004027443966,4.52318912242391,-0.016  
8023933307633,0.986594260565483,NA,NA  
"Gm16419",0.712620607171951,0.401527859636517,3.11736609213162,0.12880  
3562934104,0.897513086203768,NA,NA  
"Gm47191",17.2359583960697,-0.779902704455083,0.497282672542563,-1.568  
32873437457,0.116804433325818,0.221995598107691,-1.17382978670377  
"Gm2099",15.8695415279507,-0.180754143808152,0.379758473009355,-0.4759  
71325605418,0.634094806424238,0.748983833801339,-0.0522447944204586  
"Gm46338",0.10500178835157,-0.544048378937456,4.78471990596623,-0.1137  
05376621746,0.90947135024012,NA,NA  
"Gm6190",2.18954003803221,0.440719069808196,1.12708806282652,0.3910245  
20926037,0.695779110893786,0.797323799710386,0.09982040548754  
"Selenok-  
ps6",0.281825827103248,-0.0443574546264433,4.78471990595571,-0.0092706  
4812534377,0.992603198945212,NA,NA  
"Gm48869",2.42769073468578,-0.00950930431791947,1.23575365672212,-0.00  
769514560300247,0.993860222725051,0.996159287651933,-3.65928188294561e  
-05  
"Gm48349",6.19497469333331,-0.00818270532642621,0.731440210399651,-0.0  
111871144217725,0.991074160303735,0.994184492339468,-4.77254943982744e  
-05  
"Gm47474",0.24845030173196,1.12692389145291,4.75585301880052,0.2369551  
55468016,0.812691580297086,NA,NA  
"A030005L19Rik",42.8475078360942,0.00557262826244174,0.350646028594083  
,0.0158924607952505,0.987320184658034,0.991796443094402,4.590391927127  
66e-05  
"Gm18592",0.0951684777937184,-0.0613173623741702,4.78471990596623,-0.0  
128152459452666,0.989775192989056,NA,NA  
"Gm48501",199.049879773819,0.513146800578646,0.276141928474769,1.85827  
195244467,0.0631304046976187,0.138679205812773,1.01376865500753  
"Gm48368",2029.96642298085,0.913889500305311,0.392838370637718,2.32637  
534572231,0.0199985356884697,0.0574273120550488,2.61119731228552  
"Gm48800",217.030523149021,0.573161082681755,0.283583658737497,2.02113  
57919333,0.0432657101417758,0.104211836484786,1.2961061001767  
"Gm19144",0.71003152223599,-0.563730925000145,1.8507179498593,-0.30460  
1208975685,0.760669899122275,NA,NA  
"Ndufb1-  
ps",2592.60199109611,0.918481562686652,0.230310416135128,3.98801573154  
971,6.66282464035825e-05,0.000722936866097413,6.64263194369057  
"Gm5655",4.10871109254683,-2.19330221507965,1.32007938498836,-1.661492  
6647756,0.0966145409042594,0.192184280611227,-3.61741459880509  
"Gm48054",342.221150892229,0.744714612780838,0.33590914354754,2.217012  
0316342,0.0266222693624563,0.0719147974548591,1.96029233875272  
"Gm48493",285.216551118691,1.03557319015504,0.484069866926916,2.139305  
21378929,0.0324109577255792,0.0834499730615276,2.57185425230088  
"Gm3565",0.138800114275536,1.35764514861729,4.78471990595968,0.2837460  
02963778,0.77660503769474,NA,NA

"Gm5928",1.6805680807165,1.0934005209518,0.968100382369655,1.129428870  
04697,0.258716959799628,0.399814796082519,1.00237913596089  
"Gm8784",3.07120182772789,2.01060051448232,1.32931525085406,1.51250842  
355908,0.130404571351994,0.240574163328715,2.86455656885925  
"Gm35755",10.3488224261944,0.068650969906516,0.648129417432394,0.10592  
1700296341,0.915644476574033,0.948401052768082,0.0036369783657735  
"Vmn2r-ps99",0.121669604013298,0,4.78471990596558,0,1,NA,NA  
"Rpl17-  
ps3",55.1437064647619,-0.856132134126159,1.8215652724313,-0.4699980544  
66339,NA,NA,NA  
"Scamp4",1906.54938563087,0.0611569101320308,0.0923588673424325,0.6621  
66090726119,0.507864783350352,0.642467238419851,0.0270582299454324  
"Gm48498",858.170291532668,0.412050097880033,0.283617625363105,1.45283  
671052707,0.146269096619322,0.2629407069231,0.550427531214387  
"Gm6554",0.172630236884794,-0.0647692058923105,4.78471990596335,-0.013  
5366765798739,0.989199624599712,NA,NA  
"Gm48813",0.270166114185926,0.864211787937347,4.78471990596027,0.18061  
9096817101,0.85666656532558,NA,NA  
"A030014E15Rik",0.73513960895706,-0.159208444096149,1.88062137118458,-  
0.0846573619419554,0.932533794464802,NA,NA  
"Gm48260",325.83512105569,0.652114630841314,0.376112941597165,1.733826  
62152519,0.0829488506359242,0.170893564000343,1.15210027551172  
"Gm47659",22.9917880248351,0.256878983873155,0.408290754145217,0.62915  
6994776793,0.5292462802707,0.661636538804134,0.106101015207809  
"Gm9616",4.10690600801455,0.612093368650771,0.960366331307432,0.637354  
047822016,0.523894253109812,0.65677940893301,0.257328380858913  
"Gm48552",96.4955400666779,-0.163697949642083,0.26849630079427,-0.6096  
84189904401,0.542071029594217,0.672522619213716,-0.0649421742256279  
"Gm48033",0.14728986473751,0,4.7847199059615,0,1,NA,NA  
"Gm6474",0.138223288849165,1.36708180506263,4.78471990595992,0.2857182  
51419436,0.775093924572573,NA,NA  
"Gm49331",136.161688795646,-0.791974544229784,0.202296298117349,-3.914  
92356311122,9.04328525082777e-05,0.0009121881832418,-5.54355590249328  
"Gm48319",0.156803170926827,0,4.78471990596498,0,1,NA,NA  
"Gm9269",0.507102875235364,-0.236600274321175,2.84399941609067,-0.0831  
927998938915,0.933698237747047,NA,NA  
"Gm18473",1.2275513434342,-2.67355975339435,1.88982487983965,-1.414712  
96198683,0.157152672373492,NA,NA  
"Snapc1l",0.63248382982285,2.09753666441768,4.42428546614029,0.4740961  
40601785,0.635431350631942,NA,NA  
"Gm7557",0.558622485673375,-2.18843570163776,3.72055846617255,-0.58820  
0863266926,0.556397478022546,NA,NA  
"Gm47706",0.153599814026862,0,4.78471990595992,0,1,NA,NA  
"Gm5668",0.164526936649626,-0.0645499751643409,4.78471990595393,-0.013  
4908576537609,0.989236179475434,NA,NA  
"Gm47065",0.147395765283188,-0.0684796481370816,4.78471990596623,-0.01  
43121539991697,0.988580943135884,NA,NA  
"Gm47727",16.1424005347166,0.735211484747588,0.708169132031571,1.03818  
629123023,0.299183333644811,0.443576658764088,0.597642125047413  
"Gm49230",0.499457344529593,-1.67897326346256,4.75797229435505,-0.3528

75796577152,0.724181556606708,NA,NA  
"Gm47860",15.4292940504805,0.40034394649447,0.503069584095868,0.795802  
328646006,0.426146938041653,0.569071501810572,0.2256935757649  
"Gm6841",0.386527690221074,2.27918444743289,3.61020253898297,0.6313176  
12466961,0.527832873203858,NA,NA  
"Gm9472",0.0721532113593249,-0.544048378937457,4.78471990596623,-0.113  
705376621746,0.90947135024012,NA,NA  
"Gm48641",204.540433233486,0.711976278241968,0.418074134204158,1.70299  
049855663,0.0885698465226308,0.17987031220688,1.22140895783057  
"Gm48048",0.121476062291212,0,4.7847199059656,0,1,NA,NA  
"Gm8557",3.60908758448898,2.11406229117889,0.953110561475733,2.2180661  
6842606,0.0265503211561805,0.071790065442131,5.56845947532777  
"Gm48499",725.701512023736,0.323522958337274,0.350060832482378,0.92419  
0678640292,0.355387047918837,0.500469535171808,0.223945358162862  
"Gm4120",0.254031847690368,0,4.78471990595507,0,1,NA,NA  
"Gm48416",1420.69345598034,0.513411868599999,0.251491701718069,2.04146  
643842568,0.041204486510222,0.100120356242196,1.18155696352904  
"Gm20075",92.9671901630643,2.27716956431659,0.718935382245606,3.167418  
96497542,0.00153798566712673,0.00821579302401014,10.9342782620381  
"Gm7252",7.68871958109322,0.185443428588571,0.743481079671582,0.249425  
888107988,0.803031362001405,0.874461542875722,0.0248766724973389  
"Gm20336",12.1111013878816,-0.795966398460873,0.564755855566475,-1.409  
39910691583,0.158717187993997,0.279756620096452,-1.01393007029514  
"Gm18939",3.37111215603869,-3.10383104897446,1.54466816065673,-2.00938  
37162118,0.0444964557947113,0.106322536162412,-6.95654827934629  
"Gm5374",1.30445323160006,0.956387688998253,1.57667199022036,0.6065863  
38141636,0.544125469044628,NA,NA  
"Gm18246",0.322496266084788,0,4.78471990595705,0,1,NA,NA  
"Gm7002",0.0881368895425435,-0.0628137914692361,4.78471990596623,-0.01  
31279976056511,0.989525674262151,NA,NA  
"Gm36298",98.5298401110658,-0.75980732127177,0.194213860418421,-3.9122  
1985719668,9.14515959157601e-05,0.000920559224143257,-5.311455281117  
"Gm7143",43.4111725365653,0.718850711775429,0.559669882786008,1.284419  
14400865,0.198995338075589,0.33036185054892,0.796175116702415  
"Gm3800",2.49570962190859,0.668432289879306,1.12095853827491,0.5963042  
04888775,0.550972022509224,0.68095341098666,0.25685271937336  
"Gm49341",0.113424160122724,-0.0813388005288003,4.78471990596623,-0.01  
69996994865627,0.986436855512892,NA,NA  
"Gm18078",0.16812996139745,-0.0614956534540448,4.78471990595281,-0.012  
8525085402672,0.989745464188204,NA,NA  
"Gm47985",10.4020152103304,2.1115935405797,0.744047381375175,2.8379826  
2508092,0.00453996538875532,0.0184311502551563,8.43309877884862  
"Gm48592",43.5077785343775,0.0790481150957018,0.356239483605841,0.2218  
95996186555,0.824394847424043,0.887529718683341,0.00943148928539058  
"Gm7054",0.132841191463585,2.02867955112454,4.76380982232172,0.4258523  
38105267,0.670215446721158,NA,NA  
"Gm47605",22.9244156177694,0.188696615984527,0.475369411444524,0.39694  
732442108,0.691406305108925,0.793702686901019,0.0435976620418031  
"Gm38655",0.216201479293286,-1.7478851597992,4.7563431638151,-0.367485  
082467684,0.71325721712268,NA,NA

"Tmed10-

ps", 9.66595895291796, 0.438592192261048, 0.784558501172345, 0.55903057784  
1769, 0.576140851800222, 0.701661107332962, 0.155395294665263

"Gm48067", 0.159950092268391, 0, 4.78471990595069, 0, 1, NA, NA

"Gm29844", 13.8121124420744, 1.48606676450584, 0.648300312203983, 2.292250  
57667142, 0.02189118797475, 0.0618076520896096, 4.13680581374869

"Gm47654", 156.094434165594, 0.470902846051154, 0.408389943025313, 1.15307  
160250507, 0.248880996310912, 0.388400965749173, 0.445340853270571

"Gm49351", 0.135244532497508, 2.04423067375892, 4.76350905760135, 0.429143  
862022651, 0.667818533815747, NA, NA

"Gm19198", 0.0778527997966675, 0, 4.78471990596551, 0, 1, NA, NA

"Gm48841", 112.720370831791, 1.07589311119434, 0.315193533246127, 3.413436  
50078697, 0.000641491057342846, 0.00417901524760134, 5.89339779742768

"Gm36704", 0.121527413527064, 0, 4.78471990595379, 0, 1, NA, NA

"Gm48583", 11.6163841487153, -0.555865668377372, 0.832051876644216, -0.668  
066119409835, 0.504091387566346, 0.638895857694268, -0.249035498656723

"Gm49027", 32.511496304606, 0.0258687416267147, 0.637257572878746, 0.04059  
38551814383, 0.967619682975422, 0.980187478109662, 0.00051767029030507

"H2bc14", 0.89192439005083, -0.299910622518032, 2.31199893414886, -0.12971  
9187188311, 0.896788601651833, NA, NA

"Gm47773", 33.5380288348854, 0.837641263675134, 0.488494970346448, 1.71473  
876810045, 0.0863931323497497, 0.176331340370085, 1.4536346395439

"Gm2534", 0.0857397686851634, 0, 4.78471990596623, 0, 1, NA, NA

"Gm49873", 3.50007944817576, -1.8593216774087, 1.41756856593557, -1.311627  
33294779, 0.189645906019167, 0.31904364758945, -2.12413995393306

"Gm8971", 0.116779199695001, 0, 4.78471990596232, 0, 1, NA, NA

"Gm47974", 69.7471233004779, 0.629989629297452, 0.410372935433671, 1.53516  
368868648, 0.12474362522859, 0.233242347977277, 0.917061568516474

"Gm7591", 0.440713685149175, 1.57479165065675, 3.71465841685084, 0.4239398  
2809106, 0.671609696816461, NA, NA

"Gm7896", 0.476106128944057, 0.274605230568642, 3.68684107265662, 0.074482  
5245127181, 0.940626445957944, NA, NA

"Gm47265", 2.37400245205771, 0.238494973661644, 0.997656118895136, 0.23905  
5290840864, 0.811062709460002, 0.879685192693504, 0.030572949972308

"Gm47816", 0.32992379630334, -0.0578255482456364, 4.78471990594626, -0.012  
0854615071142, 0.990357431583521, NA, NA

"Gm9098", 23.3366683186606, 2.07772538309264, 0.814975677129107, 2.5494323  
8356731, 0.0107898432128141, 0.0359809069545836, 6.90795246379293

"Gm48216", 778.652448241281, 0.788469227077766, 0.386879736605642, 2.03802  
151540823, 0.0415477812238079, 0.100758537102215, 1.8095592262809

"Gm47953", 0.256855967653404, 0, 4.7847199059565, 0, 1, NA, NA

"Gm18807", 0.303423773011203, 1.36559310626862, 4.78471990595996, 0.285407  
11538153, 0.775332256858197, NA, NA

"Gm49355", 33.1092554966796, 1.20769267387913, 0.362899096523094, 3.327902  
12334485, 0.000875026031752439, 0.00531668979966003, 6.32457106246319

"Gm20763", 0.113956816808155, 0, 4.78471990596623, 0, 1, NA, NA

"Gm47994", 2.89448784995466, 1.13265746874418, 0.971927476643154, 1.165372  
41302835, 0.243868279029707, 0.382876536317033, 1.08739953589099

"Gm21021", 0.505633297392652, 0, 3.60908073205372, 0, 1, NA, NA

"Gm9042", 6.50942380312545, -0.225352093804854, 0.751177169109274, -0.2999

98592971177,0.764178228869619,0.84726186207778,-0.0373510882324177  
"Gm48364",106.01512579943,0.398922472097219,0.327251830184548,1.219007  
61218739,0.222841303301435,0.358781753964932,0.408911890930177  
"Gm18883",0.281417025098072,0.465801176259035,3.93258847090766,0.11844  
6458281847,0.90571391644874,NA,NA  
"Gm10769",0.184774548816718,0,4.78471990596398,0,1,NA,NA  
"Gm9025.1",0.861624778412609,0.43894238796912,2.46818656223942,0.17784  
0036358865,0.858848604025066,NA,NA  
"Gm49391",29.83332212938,-7.7236387855106,2.03823221564127,-3.78938117  
366601,0.000151023030027934,0.00136833040868246,-50.9309405359237  
"Gm47505",0.451004258729198,1.12798822452888,3.1088457356022,0.3628318  
41931322,0.716730504028175,NA,NA  
"Gm19241",3.34023510165615,0.161380804207249,0.876928930192098,0.18402  
9513283246,0.853990302060748,0.907071030646645,0.0157401989689837  
"Gm48797",0.225361536985963,-0.533615273315798,4.7847199059654,-0.1115  
24871633658,0.911200143909862,NA,NA  
"H2bc9",22.0404803155143,-1.69252840705121,0.473697795869307,-3.573013  
05138051,0.000352897165102408,0.00262225187696904,-10.0599180499187  
"Gm19139",0.113058343341289,2.23400583696369,4.75316341366045,0.470004  
004184502,0.638352156775581,NA,NA  
"Gm49395",159.507046896543,0.0544235588857399,0.27302258691804,0.19933  
720319659,0.841998979137463,0.898937529169483,0.00579838045219264  
"Gm8795",1.25518312444029,0.356821565518318,1.57321523092475,0.2268103  
93456829,0.820571181497364,NA,NA  
"Gm46415",0.166308430559846,0,4.78471990595032,0,1,NA,NA  
"Gm5802",1.98662196482564,-1.18071877590263,1.3803279768484,-0.8553900  
20130204,0.392335266659112,0.536824773987324,-0.734505719573047  
"Gm48663",27.4404819836857,0.352904621931973,0.442041197514893,0.79835  
2334388658,0.42466605579388,0.567650508458571,0.199832013362037  
"Gm48852",0.813302204416134,0.829551964834123,2.45781398662874,0.33751  
6170608166,0.735727824189073,NA,NA  
"Gm48339",3.46882161762059,-0.790502515702416,0.845543885672075,-0.934  
90418309168,0.349837681136112,0.494834913225256,-0.556143089148954  
"Gm8983",0.474288481382008,1.37634167046687,3.0998351293896,0.44400479  
8002882,0.657039115005516,NA,NA  
"Gm47010",0.172947935611938,-1.11021764630672,4.7795567416205,-0.23228  
4646113503,0.816316936965611,NA,NA  
"Aldoa.1",11.9646013955793,-1.20038732700228,0.569829281079926,-2.1065  
7361223583,0.0351545560700602,0.0886846337500367,-2.90814073672454  
"Gm4939",0.311078291410799,-0.0512338191569853,3.89315463825956,-0.013  
1599753715125,0.989500161900391,NA,NA  
"Gm8416",0.858380108458312,1.61372026410081,4.0690786672992,0.39658124  
0139034,0.69167628872623,NA,NA  
"Gm6421",0.182274236347776,2.02019835901414,4.73066985851691,0.4270427  
69720456,0.669348176100083,NA,NA  
"Gm49146",227.047382468362,-0.379749973362565,0.277086638856647,-1.370  
50986987154,0.170527796557827,0.2950790714665,-0.463489368990526  
"Gm3226",2.6719290821391,-1.02626334019958,1.03011324955522,-0.9962626  
34853692,0.319122553581986,0.464173931349613,-0.787652952052768  
"Gm46426",0.980563454696357,1.41338378368018,1.65787522665737,0.852527



235436088,0.393921529295648,NA,NA  
"Gm48515",0.0721532113593249,-0.544048378937457,4.78471990596623,-0.11  
3705376621746,0.90947135024012,NA,NA  
"Gm18080",1.05436021287185,3.50880531629448,1.82105190064958,1.9268013  
8058826,0.0540043873743296,NA,NA  
"Gm48457",0.569996012051955,0.453919214317002,3.67720107449099,0.12344  
1499423535,0.901757496557067,NA,NA  
"Gm47685",2.43157368668487,-1.03041323887676,1.08352836605597,-0.95097  
947700941,0.341614794166059,0.486154678975974,-0.743163328936244  
"Naip3-  
ps1",8.44858845809442,-0.895543593543025,0.657324584251604,-1.36240696  
757546,0.173069486065429,0.298576255468389,-1.08247033310693  
"Gm4130",0.164400363045827,-0.929953895243032,4.7827217115086,-0.19444  
0310630095,0.845831128854229,NA,NA  
"3110040M04Rik",6.10502748294355,2.62400016101356,1.03759555861934,2.5  
2892385594358,0.011441284587745,0.0376637121208597,8.60424922190109  
"Gm48881",0.468395751066746,0.224412389414221,2.99212323932267,0.07500  
10515826953,0.940213875209136,NA,NA  
"Gm47996",1.36057480997967,2.13974765974198,1.95095412585839,1.0967698  
478305,0.272742014115923,0.415397890269667,1.87980778960763  
"Gm48070",0.202855071595209,2.73547276844325,4.71805349895137,0.579788  
416780614,0.562057309787394,NA,NA  
"Gm48188",3.94273528535334,-1.84222872903358,1.08650714664227,-1.69555  
141420541,0.0899708655916152,0.181950048930634,-3.13920028396655  
"Gm17938",2.02454095277237,-2.42826078563562,1.37647558948994,-1.76411  
467386459,0.0777126744345532,0.162631933683044,-4.41036679269164  
"Gm7633",12.5058030642454,0.0987195528956391,0.649128869515165,0.15208  
005302456,0.879123796579595,0.924555139904302,0.00774381711530858  
"Cyp2c52-  
ps",8.60764875284928,-0.230945593412442,0.637047549517057,-0.362524890  
940278,0.716959826443779,0.812465575729444,-0.0479631813015873  
"Gm49141",45.3933875911661,-0.856768163868608,0.709856963735155,-1.206  
95887712424,0.227447981361012,0.363805221956501,-0.866309698820225  
"Gm18990",5.48185907843112,0.481948113573096,0.585605633219226,0.82299  
091100559,0.410513162079009,0.553961217677107,0.284667761391308  
"Gm49392",25.6993901463301,-3.14382980505343,0.878726629884586,-3.5777  
1085811562,0.000346616574910845,0.00258840673213775,-18.7268910958428  
"Gm5461",0.129918798976903,-1.02924889691082,4.78111302177346,-0.21527  
3910535803,0.829553769150345,NA,NA  
"Gm47570",0.0949500915947116,2.04836625511614,4.7634299069052,0.430019  
186835683,0.667181684222319,NA,NA  
"Gm18398",0.884281843799886,0.2.50528814235185,0,1,NA,NA  
"Gm47764",0.150798618677057,0,4.78471990596031,0,1,NA,NA  
"Gm31191",0.0760296753419779,-0.0315374660590304,4.78471990596623,-0.0  
0659128782433121,0.994740951289147,NA,NA  
"Gm47563",0.110059100546827,-0.0641591363798921,4.78471990596623,-0.01  
34091728754884,0.989301348603943,NA,NA  
"Gm18072",0.368012304201604,-0.540286748183654,3.79986839524107,-0.142  
185647497767,0.886933368243888,NA,NA  
"Gm47678",91.0034916094942,0.45476550152311,0.425750568300834,1.068150

07514394,0.285452820836447,0.429654308441239,0.384174220710398  
"Gm48733",0.148885749770619,-0.0642204988088338,4.78471990596421,-0.01  
34219975402911,0.989291116922679,NA,NA  
"Gm5452",0.195818080438744,-0.54865168140248,4.78471990596623,-0.11466  
746062154,0.908708706421775,NA,NA  
"Gm47995",1.61763321241118,1.28410269616115,1.3177713328603,0.97445031  
936909,0.329832995203077,0.474471957435559,0.957366311642551  
"Gm47776",0.613921959998627,-0.125024501954695,2.14382939563343,-0.058  
3183075152088,0.95349508504402,NA,NA  
"Gm18760",3.51982974412513,-0.770570314960229,0.926750993941909,-0.831  
47503482314,0.405705325844289,0.549565266313183,-0.461284764761923  
"Gm47759",8.76140578356285,0.296062684451957,0.543218717996477,0.54501  
5616442506,0.585742777169449,0.709417640358472,0.101641537881046  
"Gm47753",0.211250623902484,-0.533908695434563,4.7847199059642,-0.1115  
86196460328,0.91115151729109,NA,NA  
"Gm18134",1.35976136357744,-0.794413558457043,1.41824160614903,-0.5601  
39792129018,0.575384090396707,0.701002186613034,-0.28221086677772  
"Gm6128",1.2989047206957,1.98773467896981,1.66436928178796,1.194287049  
58702,0.232365701694859,NA,NA  
"C330022B21Rik",19.8320013974639,0.181210206502266,0.384130565482416,0  
.471741180696441,0.63711153938507,0.751551866109873,0.0517563631675687  
"Gm41041",0.546327196652377,-0.545818688894913,4.3565002675825,-0.1252  
88340495799,0.900295282386824,NA,NA  
"Galr3",9.66808773851883,0.644665476957684,0.678185881449782,0.9505734  
26240545,0.341820963721408,0.486329899419402,0.464718764601362  
"Gm10257",0.232677216112284,0,4.78471990596169,0,1,NA,NA  
"Gm49354",1.08440107012917,5.19166801438132,4.65215029048084,1.1159716  
8840491,0.264434253526472,NA,NA  
"Gm48568",0.0837058623428614,-0.544048378937457,4.78471990596623,-0.11  
3705376621746,0.90947135024012,NA,NA  
"Gm48217",3.92679331495527,0.136602188133547,0.87847864270334,0.155498  
587550384,0.876428267369562,0.922809161569004,0.0109736396357458  
"Gm49336",1524.199269686,-0.304748021089203,0.112883081877338,-2.69967  
842852086,0.00694065266720033,0.0255965284102652,-1.11699247849296  
"Gm18073",0.448843665807768,-1.07295104226967,3.79026074663341,-0.2830  
81063281118,0.777114697446066,NA,NA  
"Gm9626",10.2002017861213,0.790185769575475,0.53763072795129,1.4697555  
9337276,0.141627960018571,0.256498417652062,1.07515266305119  
"Gm48254",10.8127166576128,-0.935969981737492,0.641095009260845,-1.459  
9551832678,0.144302391455242,0.260278263514738,-1.25981931681872  
"Gm4813",2.01794738395279,0.530205357648856,0.986445696752837,0.537490  
669171325,0.590928728489833,0.714183868350261,0.178474986911671  
"Gm46432",0.157502682527355,-1.19648096621745,4.77621924155054,-0.2505  
07965758505,0.802194545266423,NA,NA  
"Gm18361",2.92204815192478,2.80538149508802,1.3284690318202,2.11174022  
720291,0.0347087366265851,0.087866910769301,6.82249699342625  
"Gm48705",0.0757213451132188,-0.0542217389749599,4.78471990596623,-0.0  
113322702353693,0.99095835006274,NA,NA  
"Gm18517",447.572374591381,0.894282235325684,0.299783852865954,2.98309  
007231805,0.00285354003063533,0.0130113472465128,3.88291393979146

"Gm5790",1.4626704945597,-2.93876814019798,1.66387852341332,-1.7662155  
6131954,0.077359691319768,0.161997557872714,-5.34906941583977  
"Gm47991",0.0968664757612559,-0.544048378937457,4.78471990596623,-0.11  
3705376621746,0.90947135024012,NA,NA  
"Gm29776",7.74415187803018,-0.180304894037522,0.611722065372079,-0.294  
749698014983,0.768185095230275,0.849989526276341,-0.029305180097799  
"Gm49646",1.57304894388157,-0.648669179322437,1.60786347930731,-0.4034  
35482968923,0.686627887975314,0.789705099967126,-0.153148000323092  
"Gm18759",0.528335031163601,-2.36060200636311,4.74105756037739,-0.4979  
06211072282,0.618550149328076,NA,NA  
"Gm47052",1.50756882140243,-1.71434210810944,2.13869955354411,-0.80158  
1552335643,0.422795052286447,0.566029794663633,-0.975646770920969  
"Gm7371",0.24754509420055,-0.551190777108228,4.78471990595003,-0.11519  
8128196134,0.90828808228388,NA,NA  
"Gm48432",0.515151877590586,1.71869156241698,2.61601133412227,0.656989  
340986031,0.511187770196439,NA,NA  
"Gm48894",0.147584720452783,-1.19613598147574,4.77623172629649,-0.2504  
35081466039,0.802250902680516,NA,NA  
"Gm4118",22.4828762886432,0.225445144051788,0.45863880062187,0.4915527  
07154533,0.623035583144943,0.740676320055275,0.0676767304246521  
"Gm48113",4.61215826468108,0.90362060745133,2.3316182479079,0.38755083  
867701,0.69834845581036,0.798849996561478,0.202937004419418  
"Gm9012",2.75965998952866,1.14657689515825,1.13756368483226,1.00792325  
77887,0.313491305290391,0.45865186992962,0.893715195163976  
"Gm18578",0.460216852660171,-1.89513065838334,3.11475926835942,-0.6084  
35675153004,0.542898556425089,NA,NA  
"Gm48040",16.098062395167,-0.0685413149369005,0.452172812761095,-0.151  
582123034704,0.87951653421013,0.924763448232804,-0.00536111699137051  
"Gm21378",3.50904911704627,-3.11331758362873,1.52811497258843,-2.03735  
820895412,0.0416141585698831,0.100856788538916,-7.14211773327067  
"Gm49361",0.40995976509406,-1.52807025590739,4.76093289900029,-0.32096  
0258908134,0.748240507616317,NA,NA  
"Gm8947",127.444630998407,2.78989559393018,0.600992411000036,4.6421477  
923288,3.44806076230878e-06,7.41238023632819e-05,26.5312761850501  
"Gm47747",0.0886915477092957,-0.544048378937457,4.78471990596623,-0.11  
3705376621746,0.90947135024012,NA,NA  
"Gm20784",0.150798618677057,0,4.78471990596031,0,1,NA,NA  
"Gm7473",2.08749187642421,3.99921284828549,1.33825879555095,2.98837030  
7433,0.00280469506266261,0.0128582046395005,17.4116656321572  
"Gm21162",0.911136529128858,-0.55721823884806,2.33443119363863,-0.2386  
95507653637,0.811341700455305,NA,NA  
"Gm6363",2.36062159958277,0.281058480871416,1.10077265371886,0.2553283  
64055815,0.798469494422975,0.871309503148599,0.0387180606561181  
"Gm49038",0.0766430935706283,-0.544048378937457,4.78471990596623,-0.11  
3705376621746,0.90947135024012,NA,NA  
"Gm49195",2.54591547230053,0.878550684477928,0.875368413220806,1.00363  
535079523,0.315554408755019,0.460771351898851,0.680747933888794  
"Gm20150",0.378055538263923,0.370495830429083,3.11694174792425,0.11886  
5176314513,0.905382171389862,NA,NA  
"Gm2573",1.34655226986951,-2.40796166152616,1.59201614322031,-1.512523

39480388,0.130400765698179,0.240574163328715,-3.43068767037593  
"Ndor1.1",873.819454966833,0.1513874311873,0.213462977968452,0.7091975  
97766454,0.478201864022443,0.615596795733016,0.0734475927125447  
"Vmn1r218",434.897606721314,0.694264544477597,0.31784135440058,2.18431  
155941592,0.0289393619432428,0.0765250932379314,1.78435469901043  
"Gm49387",0.5593256562158,-2.39820670909336,4.74015785100426,-0.505933  
933948058,0.612903029390276,NA,NA  
"Gm4240",0.77773420759882,-0.363600428192267,2.59741092230753,-0.13998  
5716187428,0.888671276089515,NA,NA  
"Vmn1r81",1152.92953021685,0.799271594888777,0.325685324501905,2.45412  
223013476,0.0141228967517794,0.0442571907531655,2.49191895839657  
"Gm49274",104.54429600984,0.382456209155493,0.304539944617365,1.255849  
07962082,0.209170693289595,0.342752347067864,0.409513881728978  
"Gm49051",7.88712608642265,-0.182428766774993,1.12854983554712,-0.1616  
4883554881,0.871582397805244,0.919495378877104,-0.0153112939439167  
"Gm7043",1.09916039103567,0.88962512805355,1.98473401520791,0.44823393  
0207699,0.653984377621001,NA,NA  
"Gm18994",9.41436391097301,0.768805884453743,0.598000640498569,1.28562  
71923267,0.198573201968083,0.329737718614689,0.852957633385572  
"Gm29742",0.108504214845957,1.36971699869121,4.78471990596623,0.286269  
003329382,0.774672096883095,NA,NA  
"Gm49275",0.521933255216138,-1.76016201028043,3.73303682200284,-0.4715  
094155798,0.637276997464335,NA,NA  
"Gm8705",2.71363648955394,-1.91992130196721,1.04043113714201,-1.845313  
19126137,0.0649919926810207,0.141746518265609,-3.75097885289883  
"Gm48983",0.0778527997966675,0,4.78471990596551,0,1,NA,NA  
"Gm49109",0.0778527997966676,0,4.78471990596551,0,1,NA,NA  
"Dpep2.1",0.957583341446885,2.61489869931515,4.68310189324361,0.558368  
952656724,0.576592469096179,NA,NA  
"Ndor1.2",13.0367054020269,0.219016130979218,1.17263956012757,0.186771  
910505384,0.851839471512044,0.905773355267592,0.0216751863334381  
"Gm5212",0.148177164577155,2.59891947282788,4.7275994170606,0.54973343  
6265582,0.582502219767124,NA,NA  
"Gm49177",0.133847251211772,2.03754837044904,4.76363778235552,0.427729  
492363192,0.66884807530557,NA,NA  
"Gm4350",0.379076669650699,2.20662808737038,4.6974689556475,0.46974830  
6631697,0.638534850690461,NA,NA  
"Gm49029",0.117770843086015,0.881722806379311,4.78471990596623,0.18427  
8876027803,0.85379468462314,NA,NA  
"Gm8043",2.23116753903328,-2.62135953525174,1.31396706072988,-1.994996  
38430482,0.0460432742144284,0.109069284922321,-5.80833494794515  
"Gm18368",0.100532412451372,0,4.78471990596383,0,1,NA,NA  
"Smim40-  
ps",0.536323038625019,-0.541957511635719,4.78471990595189,-0.113268388  
17912,0.90981777849859,NA,NA  
"Gm48930",0.495962121471665,1.3630225276443,2.20397473653821,0.6184383  
627669,0.536286416266197,NA,NA  
"Gm6852",0.39203616801157,1.95151579626431,3.57849997522078,0.54534464  
434191,0.585516504560943,NA,NA  
"Gm5219",0.196603854589184,-0.0662828255192221,4.7847199059509,-0.0138

530210382397,0.988947241909694,NA,NA  
"Gm18076",0.13317387121926,-0.0720474067883076,4.78471990596623,-0.015  
0578107400747,0.987986059294861,NA,NA  
"Vmn1r38",7.20018966884985,0.349394255299575,0.707356962067658,0.49394  
333276691,0.62134620034407,0.739486554007732,0.105446899586069  
"Gm49220",0.163401189624204,0,4.78471990595423,0,1,NA,NA  
"Vmn1r10",0.14728986473751,0,4.7847199059615,0,1,NA,NA  
"Gm46522",0.0881414472437405,-0.0643705920969097,4.78471990596623,-0.0  
134533668348368,0.989266090106544,NA,NA  
"Gm48909",2.48720910269442,-0.388335343242527,1.26697748565056,-0.3065  
05322818051,0.759219927715198,0.844020192176916,-0.0658534649182211  
"Gm16374",3.66151919666382,-0.687888940550931,1.00937871030399,-0.6814  
97374106256,0.495556827745624,0.631485983098109,-0.316208467388875  
"Gm49286",2.32524227406254,1.244863710667,1.50558209413984,0.826832170  
435857,0.408332193205702,0.552049722862625,0.739594891263235  
"Gm49183",7.92452788424456,1.41533497044585,0.60545885208856,2.3376237  
139214,0.0194067766694323,0.0561331154874041,4.07620625031644  
"Eef1akmt4",219.789696716317,0.0272782655757703,0.133095472443336,0.20  
4952618409944,0.837609144153451,0.896267041474293,0.00298743034813536  
"Gm49121",0.120701025406302,-0.999956691173236,4.78169649435351,-0.209  
121740025541,0.834353203805696,NA,NA  
"Gm48985",0.10279707042082,0,4.78471990596623,0,1,NA,NA  
"Gm49215",0.385500080944954,3.53719207964316,4.68380735784239,0.755195  
892871346,0.450131452630361,NA,NA  
"Gm49057",7.77821207848296,-0.165659681522689,0.581096359499574,-0.285  
081258580507,0.775581888037153,0.854849952116926,-0.0259802952123136  
"Gm49378",15.3932668512397,0.826797692855717,0.633857982881301,1.30438  
949289142,0.192100815826075,0.322062055629993,0.936770907781637  
"Gm49102",79.1504892874818,0.462824088879115,0.357127097487929,1.29596  
463593682,0.194987668842958,0.325574515416081,0.519364492700882  
"Gm19236",2.24667061267099,-1.08420742799945,1.53085102903989,-0.70823  
8363780852,0.478797245937941,0.616291833991152,-0.524793985877303  
"Gm49037",36.772416929725,-1.68544261471959,1.76054988869686,-0.957338  
741458292,0.338396307043236,0.483019853201246,-1.22649241460575  
"Vmn1r20",32.8847330686485,2.15429384121668,0.342301153542537,6.293562  
90191108,3.10260696585503e-10,6.23655985775684e-08,35.7402777475624  
"Vmn1r76",210.021165772529,0.173169629744943,0.213950820897005,0.80938  
9882305271,0.418290920080356,0.561310141756832,0.100002290244631  
"Gm49273",998.183798722504,0.538143731919243,0.268268384371673,2.00599  
013252964,0.0448573007877389,0.106945158049906,1.20298754917199  
"Gm49252",2.57278836586029,-0.0532311262833333,0.965521230386912,-0.05  
51320101599445,0.95603329449746,0.973203360974809,-0.00144587527281073  
"Gm49111",24.5251353077944,1.31304733787004,0.620820150687038,2.115020  
48768382,0.03442820119102,0.0873267941749067,3.20133801293477  
"Gm9212",0.199841977114037,-0.0630599745855134,4.7847199059615,-0.0131  
794495445688,0.989484625105795,NA,NA  
"Gm18605",0.363292860483802,2.91728773399813,4.70891726217359,0.619524  
101099101,0.535571149724106,NA,NA  
"Gm49333",5.22177349363042,1.99446441264363,2.08994758880847,0.9543131  
24082085,0.339925166752521,0.484599027662547,1.44485678935585

"Gm49168",0.100532412451372,0,4.78471990596383,0,1,NA,NA  
"Gm6330",3.48028359894693,1.98262947243606,0.957361527774347,2.0709307  
9773661,0.0383652635802728,0.0949537838649606,4.6678334207938  
"Gm4291",0.200207214489943,-0.535358649300552,4.78471990596623,-0.1118  
89234860539,0.910911232339854,NA,NA  
"Gm8518",0.253642558141722,-1.45800861008992,4.76672491919669,-0.30587  
2194180577,0.759701957773901,NA,NA  
"Gm34417",0.108229817038987,-0.909962624367568,4.78339755770097,-0.190  
233534509919,0.849126134161093,NA,NA  
"Gm48979",4.33658089125047,-1.38174163146946,1.30254399737078,-1.06080  
227175323,0.288779769594347,0.432692534200459,-1.15752349577115  
"Gm17923",0.0778527997966676,0,4.78471990596551,0,1,NA,NA  
"Pnp",4376.74059710548,-0.357331979428555,0.291762299972717,-1.2247366  
4164962,0.220674463675679,0.35650929594402,-0.368550404018903  
"Gm2581",2.34464385084713,2.9035069178889,1.38085965290191,2.102680682  
8537,0.0354936917643884,0.0894129201578869,7.01048866921967  
"Gm9298",0.132727226205492,-0.545351023833956,4.78471990596623,-0.1139  
77627646278,0.909255528405949,NA,NA  
"Gm15667",1.29033064863982,-2.22768987310835,1.51658817880695,-1.46888  
252476081,0.141864655300009,NA,NA  
"Gm18146",0.466213643146849,0,4.78471990595221,0,1,NA,NA  
"Gm39653",0.159190895774064,1.38153554104331,4.78471990596496,0.288739  
062723608,0.772781067503216,NA,NA  
"Gm48990",1.89639049476306,-3.9889682876139,2.71268513595307,-1.470487  
02215579,0.141429898000993,0.256234914627705,-5.43162103170441  
"Gm49205",0.310832938469241,-0.69726786186081,4.76124977975917,-0.1464  
46394143195,0.883569004840089,NA,NA  
"Gm49244",0.650281420135398,-0.628642638300262,2.41738254147495,-0.260  
050954912871,0.794824468931911,NA,NA  
"Eppk1",349.552839103197,-1.12199804197813,0.222750074119664,-5.037026  
57075381,4.72819167475184e-07,1.51177569890021e-05,-12.4537749587184  
"Gm49078",0.0949500915947116,2.04836625511614,4.7634299069052,0.430019  
186835683,0.667181684222319,NA,NA  
"Gm8139",0.384953564603898,1.83755727604725,3.69837596047165,0.4968551  
86083599,0.619291175526191,NA,NA  
"Gm6986",0.14728986473751,0,4.7847199059615,0,1,NA,NA  
"AL731706.1",1012.39640516201,0.343158721275668,0.337228679464531,1.01  
758463076317,0.308875394331508,0.453771280792326,0.271150979696749  
"Gm3219",140.764892991379,1.03056473791771,0.302757239633857,3.4039309  
486506,0.000664235426394967,0.00428707790263127,5.61879345308611  
"Gm21178",0.0842765595565324,0,4.78471990595952,0,1,NA,NA  
"Gm2387",2.44367805393875,-0.667879913452293,1.14852490174279,-0.58151  
1042937636,0.560896077831065,0.689164517332541,-0.248635168095861  
"Gm48931",1.93705279298033,1.67199448407044,1.15959552405014,1.4418773  
1790361,0.149336985995575,0.267122716990299,2.20711148993743  
"Gm49356",7.99401971577723,-1.02284932485773,0.590360349247768,-1.7325  
8472754994,0.0831695057060787,0.171167302328174,-1.80544548377828  
"Vmn1r3",0.950477696445988,-3.17583382447875,1.86593104221293,-1.70201  
028474895,0.0887534403119786,NA,NA  
"Gm4940",0.330957840699719,-1.76235069453955,3.85170751642832,-0.45755

0498583488,0.647275414212297,NA,NA  
"Vmn1r36",0.0765946074782908,-0.544048378937457,4.78471990596623,-0.113705376621746,0.90947135024012,NA,NA  
"Gm9732",175.585789582297,0.95531398442976,0.552802881636683,1.72812772176831,0.0839653284169037,0.172568353902476,1.67845024116933  
"Gm49017",1.3554330523051,2.376207101007,1.68582749282333,1.4095197231761,0.158681545633576,0.27971908297292,3.02721526431292  
"Gm9247",16.4500854353235,0.0687455243731442,0.773804300345814,0.0888409696643218,0.929208297319057,0.956303244594089,0.00307156479348421  
"Vmn1r24",1.13704662006923,0.139546484803908,1.50430569701941,0.0927647120398473,0.926090485800894,NA,NA  
"Gm49009",1.8640617587459,-0.60322655302146,1.37457563983473,-0.43884565937309,0.66077337350582,0.769685120772835,-0.157908896085907  
"Gm6340",0.160934700541735,-1.33023217156264,4.77126518777119,-0.278800720398446,0.780397761571905,NA,NA  
"Gm4266",0.139896150021884,0,4.78471990596454,0,1,NA,NA  
"Gm6704",0.724251427800133,-1.86859521114377,2.26843949667823,-0.823735970864566,0.410089596003344,NA,NA  
"Gm49250",0.098028280348492,0,4.78471990596623,0,1,NA,NA  
"Gm29697",0.464771675267089,-1.37186646208372,4.76985922185126,-0.287611520230838,0.773644125469987,NA,NA  
"Mcpt-ps1",0.130948415517773,1.36054659921489,4.78471990596623,0.28435240222074,0.776140331546053,NA,NA  
"Gm4824",9.64373743783408,-0.0375106272940624,0.563839730645561,-0.066527109132794,0.946958175545887,0.967309892988783,-0.00124671695340209  
"Gm9290",0.0908781784372449,-0.544048378937457,4.78471990596623,-0.113705376621746,0.90947135024012,NA,NA  
"Gm7908",24.8257316269776,0.484644813076318,0.501386767121892,0.966608703812273,0.333739681855138,0.478439549798653,0.357292470432794  
"Gm7691",0.121387884889373,2.32501364316154,4.74609550834317,0.489879236326869,0.62421935672592,NA,NA  
"Gm4606",0.294789908656339,-0.405877169830989,4.78410869921771,-0.08483861788035,0.93238969156997,NA,NA  
"Gm49298",1.03501188538705,-0.899082138840593,2.0332100664021,-0.442198351118523,0.658345679153725,NA,NA  
"Rpl19-ps5",0.198518192916634,-1.20095429343756,4.77605761479043,-0.251453058212377,0.801463850540245,NA,NA  
"Gm17922",74.4789194663001,-1.07331192242596,0.67109936714401,-1.59933383187894,0.109746446023326,0.211550786412536,-1.66716487394582  
"Gm30970",0.0815902131317557,-0.0769935458870698,4.78471990596623,-0.0160915471334203,0.987161357053721,NA,NA  
"Gm49011",0.237375228986779,3.30967364383138,4.69278388132722,0.705268712032681,0.48064302763389,NA,NA  
"Vmn1r17",0.198844138204494,0,4.78471990596209,0,1,NA,NA  
"Gm49288",2.96899464233867,1.3866092802168,0.877351058499646,1.58044977182569,0.114003901002853,0.217819506296288,2.11331527447868  
"Gm18813",0.14728986473751,0,4.7847199059615,0,1,NA,NA  
"Gm7595",0.249211445705551,-0.938993011516377,4.78274875089513,-0.1963

29153050458,0.844352544558432,NA,NA  
"Gm49059",1.33299028007976,-1.15886600192062,1.72604928871253,-0.67139  
7977739692,0.501967032858886,0.637031580752575,-0.522574454278811  
"Gm48976",42.956115344039,0.628787207371325,0.277255671722431,2.267896  
64379101,0.0233355069636536,0.0648788984425093,1.71987942381694  
"Gm7232",1.56849566970043,2.01319284716888,1.15445168365585,1.74385197  
377305,0.0811849049274587,0.16814778800463,3.58934567702794  
"Gm49031",0.0810182756847091,0,4.78471990596022,0,1,NA,NA  
"Gm6087",1.25815945712046,0.244424882084608,2.00543685113411,0.1218811  
16299614,0.90299317112841,NA,NA  
"Vmn1r216",12.0935581141165,0.683176901195631,0.485176802041427,1.4080  
9885864514,0.159101798969863,0.280206564566379,0.869156931045891  
"Vmn1r6",200.24339345018,0.620471097341787,0.349168872035258,1.7769943  
0572131,0.0755691767215439,0.159136819064333,1.14042026135137  
"Gm5206",0.0983297628430322,-0.0548251397145103,4.78471990596623,-0.01  
14583801752213,0.990857735421626,NA,NA  
"Vmn1r28",42.6607042105839,0.775420408123858,0.611310353378477,1.26845  
620041998,0.204635082634265,0.337133488906033,0.843096245895689  
"Gm49044",2.89233883329035,0.849798217815428,1.11930610915863,0.759218  
779261564,0.447721694124912,0.588564335853014,0.450451722538252  
"Gm30083",0.0778527997966675,0,4.78471990596551,0,1,NA,NA  
"Gm49190",1.09206351210365,1.37577667217036,1.62810497327898,0.8450171  
79328165,0.398101247366707,NA,NA  
"Gm49001",5.28303452787617,1.76908654667846,0.87952067044759,2.0114212  
2763092,0.044280983018404,0.10604158768028,3.96969562785457  
"Gm8586",0.295618340446327,2.14147009701836,4.69984130166655,0.4556473  
20742299,0.648643609116333,NA,NA  
"Rpl19-  
ps3",1.40180825545194,-3.75165461521842,1.82203600232675,-2.0590452715  
6847,0.0394899018434585,0.0969972963297994,-8.75288098830891  
"Gm18787",0.74683181678562,-0.400851092368087,2.10695949933891,-0.1902  
5097183589,0.849112470693538,NA,NA  
"Gm18909",1.45094747348082,1.68808182275837,1.70857677807736,0.9880046  
62370479,0.323150364813924,0.468111873190333,1.28133507460182  
"Gm18811",0.0887163521009669,-0.064521584852401,4.78471990596623,-0.01  
34849241168635,0.989240913322298,NA,NA  
"Dpep2nb",0.82610201250311,-2.01099445907117,1.96987725531366,-1.02087  
297756579,0.307314623325,NA,NA  
"Gm18147",0.166052662929506,0,4.78471990595919,0,1,NA,NA  
"Vmn1r217",33.4169295197651,0.0702848361723912,0.453370506415386,0.155  
027367633824,0.876799741877084,0.923069811786239,0.0056263300649406  
"Vmn1r16",21.4904591705816,0.509674956050103,0.672103834181161,0.75832  
7701955535,0.448254827381306,0.58895368088145,0.269825865950452  
"Gm48981",0.164949458486416,0,4.78471990595938,0,1,NA,NA  
"Vmn1r19",9.61176627459345,3.64834842247435,0.84066042781844,4.3398598  
3132572,1.42573628730433e-05,0.000223859249642613,30.6625189731176  
"Frg2f4",0.367587243500508,1.52864175402875,3.14827991913649,0.4855482  
33731397,0.627287506711937,NA,NA  
"Gm49309",0.379089205711353,1.38170647513676,4.75907284756012,0.290331  
0202207,0.771563009646279,NA,NA



"Gm49181",31.1435799813983,0.558072664728075,0.319773356002891,1.74521  
314628549,0.0809477737149043,0.167781406600745,0.996211773601484  
"Gm49196",19.9928414395431,0.249818805865568,0.359341016066608,0.69521  
3723721595,0.486921373065499,0.623803198422138,0.117894577676539  
"Gm9509",0.134707494573219,-0.0597814032162512,4.78471990596623,-0.012  
4942325551194,0.990031304107817,NA,NA  
"AC169509.1",27.8222211593295,0.312072924533229,0.501532410749725,0.62  
2238798219882,0.53378485772785,0.665967312258614,0.126862228279817  
"Gm18095",17.2228350636113,0.505380957411564,0.47676544273948,1.060020  
11074389,0.289135450258295,0.433059072755894,0.422943788536899  
"Gm49478",1.82668143343132,0.122067733863199,1.66374610216427,0.073369  
2080206276,0.941512319976691,0.963755103680466,0.00450650373617486  
"Gm5481",13.1086835300015,0.197298713471493,0.455445263142417,0.433199  
616810588,0.664869757244277,0.772794666274153,0.0508521448686597  
"Gm3919",0.575286021026291,-2.62502165435086,2.56635171676933,-1.02286  
122248878,0.306373466249279,NA,NA  
"Gm18283",17.201643015567,0.369647312126192,0.544773829808092,0.678533  
534285977,0.497433468988076,0.633173898572236,0.168932582168678  
"Gm8233",0.345402546313574,1.12649760052178,2.66275267983921,0.4230575  
40811414,0.672253279667717,NA,NA  
"Gm17241",0.829130874368728,-1.53698593028932,2.87079553532982,-0.5353  
86763485661,0.592382441144379,NA,NA  
"Gm28040.1",10.4777321516425,0.904855886292043,0.53122000235255,1.7033  
5432078012,0.0885017806548178,0.179750804084129,1.55289902157252  
"Gm18494",0.492429452648949,-0.133558307501087,3.00051790204901,-0.044  
5117515912441,0.964496484846928,NA,NA  
"Vps28",3788.59143748195,0.159109856755106,0.112441916567711,1.4150404  
1919538,0.157056645506897,0.277737855502924,0.2038320696064  
"Gm49496",0.398596590345744,1.32751576008186,3.77021882458748,0.352105  
758802238,0.724758949710449,NA,NA  
"Gm49527",4.63460112663934,-0.939278214014828,1.24864750661114,-0.7522  
36487112406,0.45190885496046,0.592503633921405,-0.491616594885553  
"Gm49500",6.95452622802252,1.07330526226141,0.808103443607898,1.328178  
05783562,0.18411929133212,0.31227887459931,1.24917562597641  
"Gm49483",0.733288514035739,1.52794664159481,2.01011089587335,0.760130  
520525809,0.447176570777709,NA,NA  
"Gm20369",0.165547176497528,-1.36796022017397,4.76973722250799,-0.2867  
99912942516,0.77426552960324,NA,NA  
"Sept2.1",6147.50381988685,-0.519992956261633,0.10914532700737,-4.7642  
2555613875,1.8958034854625e-06,4.55787624655338e-05,-5.19788530668289  
"Gm49510",13.6391043134089,-0.520684322542196,0.5543867333426,-0.93920  
7760984466,0.347624085117887,0.492477978030121,-0.368803587138974  
"Gm36245",0.474068063304212,-1.34487512132423,3.76594494468379,-0.3571  
14918321556,0.721005776665068,NA,NA  
"Gm5469",0.499068911739526,-1.84421149879893,3.11069350946963,-0.59286  
1846782637,0.553273613395169,NA,NA  
"Rp119-  
ps6",1.08482685766469,0.67976368571243,1.54144427232754,0.440991411701  
188,0.659219214510535,NA,NA  
"Gm49549",0.998660848903369,-2.03026825841329,1.90842428653236,-1.0638

4532660833,0.287398774023522,NA,NA  
"Gm20082",2.41265456327636,-0.810904383703235,1.21404912639667,-0.6679  
33748373114,0.504175883681162,0.638933903241278,-0.363248079426565  
"Gm49511",0.513901520321292,2.68269462387575,2.98818861866816,0.897766  
160782523,0.369310228835287,NA,NA  
"Eif2s3x-  
ps1",1.12482802944231,-2.04503132219131,2.46207466941608,-0.8306130385  
05578,0.406192266637426,NA,NA  
"Gm49486",58.0748136998904,-0.290377456616891,0.340469567908098,-0.852  
873454743749,0.393729483835006,0.538212447023555,-0.17988939010513  
"Gm49537",0.522201220630318,1.38200917897707,3.72910327872201,0.370600  
939604627,0.710934782121675,NA,NA  
"C030006K11Rik",1703.89373505449,0.110612237502295,0.441864412079793,0  
.250330722453204,0.802331599555376,0.874026024376205,0.014893398832148  
5  
"Kiss1",0.90453827869087,-1.66893919550722,4.36790321400868,-0.3820916  
15527244,0.702393410708458,NA,NA  
"Pdxp",145.170680183397,-0.202992495321824,0.21363931929791,-0.9501644  
92139954,0.342028677711786,0.486495123871054,-0.146261857923453  
"Gm10362",0.721637061204035,1.9725129771324,1.72752134806785,1.1418168  
4604857,0.253530158504653,NA,NA  
"Gm49480",0.0891926061240196,0,4.78471990596489,0,1,NA,NA  
"Gm49456",0.126555233171632,-0.542235186498634,4.78471990596623,-0.113  
326421850212,0.909771770563922,NA,NA  
"Gm18869",0.199775952816124,-0.542501237261351,4.78471990596603,-0.113  
382026100402,0.909727688909439,NA,NA  
"Nnt.1",1335.24464355332,0.413955913038086,0.39238695794719,1.05496858  
306335,0.291439693555035,0.435173161658452,0.344415978442214  
"Gm46495",0.114810471722162,0,4.78471990596601,0,1,NA,NA  
"Gm28023",4.18436169872784,2.72147188874951,1.14347091154414,2.3800097  
2414283,0.0173121811969259,0.0514719287858587,8.07384152220779  
"Gm49520",0.303654333513921,-0.572411428706545,3.88185558958462,-0.147  
458197631663,0.882770372438637,NA,NA  
"Gm49461",16.6287836620059,0.989385395586377,0.550507626587368,1.79722  
377638915,0.0723001013778043,0.15376389361523,1.85246289469607  
"Gm20564",0.661984100095273,-2.04810943335647,3.02780119100936,-0.6764  
34582111287,0.498764767085387,NA,NA  
"Cyp2d32-  
ps",0.259093286404771,-1.0702161794773,4.78031550994933,-0.22387982074  
611,0.822850817922002,NA,NA  
"Zc3h11a.1",10296.6972413788,0.175514472523721,0.259757394874583,0.675  
6861440209,0.499239935033394,0.634706168197677,0.079787670691832  
"Gm49435",0.719685808913039,0.61182918341829,3.14411224473261,0.194595  
210283379,0.845709853019637,NA,NA  
"Gm46501",0.118669629702818,-0.0663333826481648,4.78471990596086,-0.01  
38635874098975,0.988938811974419,NA,NA  
"Gm6847",0.277372611793976,-2.10237306707806,4.7466765373013,-0.442914  
753208223,0.657827395821384,NA,NA  
"Gm19141",0.14205816950368,-0.0645371625278765,4.78471990596385,-0.013  
4881798300116,0.989238315875274,NA,NA

"Gm49416",1.05979489790122,1.79344854146511,2.46266842244956,0.728254167356077,0.466458012984727,NA,NA  
"Gm49450",1.10153067855789,-2.73485115820819,1.93411913098886,-1.41400346772328,0.157360884312761,NA,NA  
"Cyp2d33-  
ps",0.429718940476481,2.04355786341468,3.60201280332712,0.567337756691781,0.570484729544951,NA,NA  
"Tmem249",1.02685772157093,-0.490620096236868,1.66580579327409,-0.294524186563531,0.768357384371953,NA,NA  
"Gcat.1",6.79481775772791,0.504416606527059,1.68597307178823,0.29918426039394,0.76479945798816,0.847757807382214,0.083309592250671  
"Gm49530",15.7578914799888,1.17557134295229,0.504465245545367,2.33033167960144,0.0197886276383584,0.0569714135569748,3.36825365791169  
"Gm32886",0.468053123128817,0.404721721694807,2.3409391069399,0.172888615724765,0.862738980238875,NA,NA  
"Gm7085",2.48927046855439,-1.07928068091928,1.1341968241993,-0.951581469716429,0.341309282884207,0.485826281039295,-0.779137219193583  
"Gm18911",0.98207823715877,-3.03268714762805,2.10938066535407,-1.43771449005815,0.150515080036955,NA,NA  
"Gm44502",252.51643469808,0.284643018339583,0.386060076648833,0.737302392960202,0.460938477328371,0.600265388635653,0.145277073526003  
"Gm49523",0.183817314283393,-0.0770130875214292,4.78471990596623,-0.0160956313086162,0.987158098775369,NA,NA  
"Gm18890",44.7198214534328,0.354733950708353,0.272047885330616,1.30393937919146,0.192254252269599,0.322180783047068,0.401786732075209  
"Gm49514",0.0877856873297316,-0.0677397674353494,4.78471990596623,-0.0141575199314974,0.988704310771269,NA,NA  
"Gm46525",0.096777501791538,0.875069186915175,4.78471990596623,0.182888278543541,0.854885680147104,NA,NA  
"Gm7318",0.229740178537757,-1.54710408323469,4.76264243337705,-0.324841535949128,0.745301006660275,NA,NA  
"Gm5232",0.564865419847336,1.17113386171655,2.33384775342614,0.501803881593092,0.615805482451469,NA,NA  
"Gm2805",3.2934815852699,-0.610594987447247,0.854579459844812,-0.714497616825624,0.474919529287443,0.612513624953471,-0.299303949494665  
"Gm49746",0.375157437404014,-2.54249946716805,3.63202008587592,-0.700023515028246,0.483912619246885,NA,NA  
"Gm49624",0.269290284980791,-2.05955292597374,4.74793746992094,-0.433778443591852,0.664449336689841,NA,NA  
"Gm17783",0.114814912629129,0,4.78471990596623,0,1,NA,NA  
"Gm49626",0.230828157252211,-0.0696989478669237,4.78471990596547,-0.0145669859964059,0.988377637816045,NA,NA  
"Eif3s6-  
ps3",0.187376412138918,2.25655955560908,4.75199092764867,0.474866132946438,0.634882392033262,NA,NA  
"Gm49728",1.67699867988484,-2.6577971565643,1.64233755603744,-1.61830139412808,0.10559766040256,0.205421848002506,-4.20646796928766  
"Gm3507",0.0983898136351888,-0.544048378937457,4.78471990596623,-0.113705376621746,0.90947135024012,NA,NA  
"Gm2808",0.516950080722391,-2.49624551709168,4.7382410659095,-0.526829

572908726,0.598311944429284,NA,NA  
"AL731706.2",0.140196621603777,-1.08666833928016,4.77907136643283,-0.2  
27380646983573,0.82012776766512,NA,NA  
"Riok2",1229.66553697994,-0.00804992968478264,0.147719586556146,-0.054  
4946670408056,0.956541057363043,0.973516939997109,-0.00021606054094999  
7  
"Gm9525",1.41370171749619,0.536942415132083,1.30231376476868,0.4122988  
09747631,0.680120420947098,0.784720277390764,0.130169853927732  
"Gm49601",71.1286676706158,-1.69703407743128,0.31826193411231,-5.33219  
306344196,9.70336931356964e-08,4.46217676594294e-06,-20.9072457478167  
"Gm6438",0.221526409014485,2.14322794748097,4.75554325123922,0.4506799  
40072561,0.652220242153155,NA,NA  
"Gm19142",0.087583724926668,0,4.78471990595887,0,1,NA,NA  
"Gm5675",0.10500178835157,-0.544048378937456,4.78471990596623,-0.11370  
5376621746,0.90947135024012,NA,NA  
"Gm4828",0.956002295473984,2.07256472708549,1.50192536205555,1.3799385  
638238,0.167605561620048,NA,NA  
"Gm5221",0.374014780325258,3.04352590268499,3.6147868876022,0.84196551  
4792451,0.399807256666506,NA,NA  
"Gm8134",0.123215801608612,0,4.78471990596334,0,1,NA,NA  
"Rpl7a-  
ps4",0.157502682527355,-1.19648096621745,4.77621924155054,-0.250507965  
758505,0.802194545266423,NA,NA  
"Gm7366",0.0804673502708677,-0.544048378937456,4.78471990596623,-0.113  
705376621746,0.90947135024012,NA,NA  
"Magef1",409.752219006325,-0.307569431669102,0.169416324636617,-1.8154  
6514085234,0.0694524583153077,0.14920521130562,-0.585130133101617  
"Gm49699",12.7851670453856,-0.512589680896994,0.444995324946049,-1.151  
89902491479,0.249362568979067,0.388965709596307,-0.48402002826146  
"Gm8670",8.53090014627332,0.883448555406208,0.695106510233433,1.270954  
22413685,0.2037444934111371,0.336121391429353,0.963208853210269  
"Gm30162",54.3589793557188,1.37892933578892,0.802110647500972,1.719126  
08327175,0.085591416315565,0.175079882010164,2.4028022117565  
"Gm7423",0.20630617864435,0,4.78471990595672,0,1,NA,NA  
"Rpl31-  
ps12",0.742673061301595,-0.60777354121946,2.32371978538187,-0.26155199  
3077161,0.793666859743604,NA,NA  
"Gm49780",0.998068617227513,1.77434968482177,1.79865802074685,0.986485  
293121486,0.323895028644059,NA,NA  
"B830017H08Rik",275.128690030083,2.15446982292839,0.696337348132548,3.  
09400296954672,0.00197475509877952,0.00989814265192884,9.9437575804462  
2  
"Gm8900",0.087583724926668,0,4.78471990595887,0,1,NA,NA  
"Gm6551",5.68551372900182,0.0924492786891386,0.876149356952468,0.10551  
7715621806,0.915965013426878,0.948459151980737,0.00489209747435438  
"Gm49630",0.131639783694368,-0.052267376297833,4.78471990596547,-0.010  
9238110746393,0.991284233140328,NA,NA  
"A630089N07Rik",472.045716104505,0.590666055130781,0.200556959867172,2.  
.94512868325276,0.00322820368950795,0.0142793838411152,2.5097037253851  
5

"Gm49739",0.344364347723161,-2.41205514758328,4.73993811070356,-0.508879038343657,0.610837013684262,NA,NA  
"Gm8363",0.142672521671049,-1.1315814283872,4.77809062527996,-0.236827117175263,0.812790913444165,NA,NA  
"Gm6553",0.656756859931927,-2.74242191055709,2.58250461813328,-1.06192333260546,0.288270491683918,NA,NA  
"Gm46540",0.679390567657713,0.33595047915064,1.98573455477321,0.169181967621553,0.865653513084445,NA,NA  
"Gm5491",2.26872740663277,0.737463272380589,1.13555214425474,0.649431447170209,0.516059543159382,0.649672583453101,0.318058145928421  
"Gm40881",15.1602491963883,-0.0787466906114663,0.383466903745862,-0.205354594730957,0.83729509239012,0.896217774522174,-0.00862842006907296  
"Gm49644",0.313942748180199,1.96115435890843,4.76516308298507,0.411560805948302,0.680661364274419,NA,NA  
"Gm4786",0.275972137834199,0.349945101818756,3.98955800336232,0.0877152560568939,0.930102993782373,NA,NA  
"Zfp520-  
ps",0.0983898136351888,-0.544048378937457,4.78471990596623,-0.113705376621746,0.90947135024012,NA,NA  
"Gm4829",1.71884308399131,0.267335470636884,0.973944871386557,0.274487271806557,0.783710183766654,0.86025903074268,0.0402397992810758  
"Gm3417",4.3687327067197,-0.205723848460271,1.35160138717861,-0.152207485440443,0.879023290226941,0.924555139904302,-0.0161375108780924  
"Gm46562",0.208706754040175,-1.12445031247528,4.77865842810296,-0.2353066931636,0.813970700564307,NA,NA  
"Gm49716",0.47475899098761,1.290881029221,3.59450146297104,0.359126583343778,0.719500395679529,NA,NA  
"Gm49591",0.126908040712052,1.37202707379402,4.7847199059605,0.28675180590714,0.774302367122928,NA,NA  
"Gm5223",0.403972986608339,3.5345543806476,4.54560443400111,0.777576322789801,0.43681882388176,NA,NA  
"Gm16385",0.327289883361919,0,4.76713073257367,0,1,NA,NA  
"Gm2792",2.83726336397015,-4.1163586722291,1.76044258332282,-2.33825215955609,0.0193741711576545,0.05607207796229,-11.8597122222127  
"Gm49760",36.0520746691885,-0.894590296708795,0.343905867107318,-2.60126500380301,0.00928806749263781,0.0319792936555628,-3.07977618784439  
"Gm8538",3.03453568120219,-1.39365372604761,0.979239337207922,-1.42320030772181,0.154678096442079,0.274473382274086,-1.80185628319778  
"Rps2-ps7",0.492420344985189,0,3.08438315530594,0,1,NA,NA  
"Gm49704",1.3462366849767,-1.3433727946371,1.55637920277701,-0.863139774831323,0.388060621471355,0.532320669582699,-0.847008917944333  
"Gm49594",83.5848913730147,0.985862035175204,0.621177169510821,1.5870867178708,0.112493005665561,0.215566449579078,1.51279155622483  
"Gm6475",4.57616171155899,-0.663026548914292,0.807907618360609,-0.820671242412213,0.411833555506145,0.555358646189834,-0.389953206631219  
"Gm46593",0.385785750403141,0.416368151434817,4.64540815504096,0.0896300470353709,0.928581206415516,NA,NA  
"Gm3320",0.302603229658278,0,4.78471990594774,0,1,NA,NA  
"Gm8938",0.121874784299246,-1.00847006243536,4.78150508486999,-0.210910590815106,0.832957039741818,NA,NA

"Gm29721",0.125558793514292,-1.03498639904526,4.78089210794988,-0.2164  
83948115925,0.828610536062342,NA,NA  
"Morf4l1-  
ps1",5.72570156199511,0.540161268969879,0.893940463835226,0.6042474760  
03551,0.545679120957577,0.675619221515801,0.211811085147168  
"Gm49721",31.1832357020901,1.42311494150306,0.60661295008066,2.3460015  
8356961,0.0189760268471781,0.0552065907887615,4.12229853370511  
"Gm6029",0.75289546023675,-0.113474790567195,2.50455464596293,-0.04530  
73726101781,0.963862310981678,NA,NA  
"Gm49717",0.795264082880636,-0.598074434964615,2.01951267033485,-0.296  
147899317437,0.767117135319283,NA,NA  
"Gm3435",122.355296062027,0.590125033203086,0.218231511381941,2.704123  
8429141,0.00684847597229598,0.0253524937360598,2.16863760890568  
"Gm8387",0.570954536296509,0.622480148729525,1.91636676124689,0.324823  
077355248,0.745314977617467,NA,NA  
"Gm34967",0.37391485083153,0.844940297720258,4.75649949419784,0.177639  
101770314,0.859006414122239,NA,NA  
"Gm17809",1.732463261496,-1.40638768500187,1.53145974418988,-0.9183314  
74488629,0.358445354107021,0.503527918903365,-0.964945259823326  
"Gm49693",0.554815304747885,-2.49716169679051,3.07755453653141,-0.8114  
11030137248,0.417129666931338,NA,NA  
"Gm49776",3.98848922943489,-0.388744463657925,1.21357789218777,-0.3203  
29223332437,0.748718772317931,0.836530700234401,-0.0693877995140064  
"Gm49711",3.9751195503764,0.587410745216707,0.816156172990725,0.719728  
361624953,0.471692260345005,0.609601358269166,0.290738975648065  
"Atp5o.1",10.4958253090962,1.13257115447855,0.50079331732916,2.2615540  
4892143,0.0237249697700777,0.0656527761250321,3.08441641222517  
"Gpr31a",0.934961868339207,-3.29275693375935,1.99311560513267,-1.65206  
520147645,0.0985212598771188,NA,NA  
"Bod1-  
ps",0.343318258033841,-1.87222765408345,4.75226961153348,-0.3939649487  
77247,0.693606917619609,NA,NA  
"Gm7450",2.55733365338851,-3.55093791427325,1.41400697336904,-2.511259  
12470766,0.0120301354822145,0.0390483738358946,-11.515528478639  
"Gm7477",0.630218486768304,-2.18736116973131,2.23815511159917,-0.97730  
5441609198,0.328417959913105,NA,NA  
"Gm49663",0.119368428029616,1.36646591073445,4.78471990596623,0.285589  
53033605,0.775192523215026,NA,NA  
"Gm4802",0.142593675237135,1.34876494091027,4.7847199059643,0.28189005  
1542827,0.778027818054424,NA,NA  
"Gm7177",0.117395248383958,-0.0682854597505669,4.78471990596623,-0.014  
271568888582,0.988613322062033,NA,NA  
"9030025P20Rik",941.220040848237,0.332022393947187,0.130174932218439,2  
.55058626333709,0.010754190671345,0.0358988216718608,1.10465537357047  
"Gm19000",81.8648630673278,0.62018796659685,0.409058818842744,1.516133  
95929565,0.129485482899857,0.239533106835844,0.886288072129472  
"Smim34",2.63117548318236,-0.385306520208112,1.03469253584172,-0.37238  
7455075885,0.709604392800705,0.807368060385607,-0.0824462053840986  
"Gm6278",0.0917377480204011,-0.0586579271006525,4.78471990596623,-0.01  
2259427563881,0.990218637035762,NA,NA

"Gm49611",0.0968494475160618,0.865645597397404,4.78471990596623,0.1809  
18761058093,0.856431342656836,NA,NA  
"Gm49673",13.5136495372884,-0.200504271193419,0.929080089283015,-0.215  
809458739075,0.829136275043715,0.891010752359036,-0.02313794905067  
"Gm29719",0.361432359902633,-2.47928116990221,4.73865305076964,-0.5232  
03776123582,0.60083245392838,NA,NA  
"Gm21926",1465.4794247415,0.295765824755266,0.138392709668101,2.137148  
88208045,0.0325858841859505,0.0837965514220723,0.733310968210557  
"Gm8128",29.5244188124403,2.02035774705073,0.704931119388068,2.8660356  
8984803,0.00415647383287759,0.0172615392531304,8.20118651566232  
"Gm49858",51.0368099822262,0.351099460900125,0.351138715867821,0.99988  
8206666135,0.317364612314987,0.462444900300248,0.270777687145569  
"Gm30531",25.1892181866047,-0.681635497164072,0.377069106992843,-1.807  
72034760464,0.0706500360871602,0.151178051319957,-1.28781189238876  
"Gm9300",0.112986472807492,-0.0699224366359472,4.78471990596623,-0.014  
6136948473741,0.988340373511595,NA,NA  
"Gm49882",0.177828253130994,0,4.78471990596106,0,1,NA,NA  
"Gm50433",24.0916380415182,-0.698781263747552,0.461982454265453,-1.512  
57100198449,0.130388664641993,0.240574163328715,-0.99557243959982  
"Gm5230",0.121821870984685,0,4.78471990596557,0,1,NA,NA  
"Gm6540",0.0810182756847091,0,4.78471990596022,0,1,NA,NA  
"Gm49869",0.087583724926668,0,4.78471990595887,0,1,NA,NA  
"Gm9805",1.11230779823488,-3.21202792963023,2.27216509513566,-1.413641  
9648848,0.157467053211437,NA,NA  
"Gm18270",2.6723387214678,-1.3426158628483,1.16775861747708,-1.1497374  
9091143,0.250252007879081,0.389916385618213,-1.26450644433897  
"Gm7912",1.75262746847499,-0.921950966499455,1.7888263324537,-0.515394  
339726,0.606277487014322,0.726787484894267,-0.294214063802167  
"Gm7253",0.764580546424468,-1.9759114872225,2.05893871299714,-0.959674  
746387289,0.337218936952145,NA,NA  
"Gm49941",1.55577688433986,1.31138416158745,3.89688131913841,0.3365214  
52461733,0.736477677197276,0.827704291313188,0.24798185909041  
"Gm9598",0.647459157336989,0.707599542998759,2.14254018985765,0.330261  
969576295,0.741202026110551,NA,NA  
"Gm49948",25.3532226658388,1.46617625576417,0.325561320836969,4.503533  
3189915,6.6832883886573e-06,0.000123751905984843,13.1915275664018  
"Gm18139",0.171334247173982,0,4.78471990595006,0,1,NA,NA  
"Gm5698",0.281909804961802,-1.90463781741189,4.75195229203203,-0.40081  
1645480016,0.688558804286757,NA,NA  
"Gm49956",8.3619336560391,1.58201500428517,0.959771369205941,1.6483248  
5636036,0.0992860267134515,0.196237095677534,2.57620334961693  
"Gm49909",1822.21026514845,-1.146025223644,0.300630624009552,-3.812070  
8009028,0.000137807387419987,0.00127707625471241,-7.63617463000216  
"Gm18738",0.320337553701801,-1.10764239107206,3.91235161661616,-0.2831  
14223774721,0.777089278476589,NA,NA  
"Gm49867",3.63170127792425,-2.82788310320709,1.51453379117885,-1.86716  
408684812,0.0618786770880938,0.136684088123219,-5.62772192567288  
"Gm9586",0.0797101898746433,-0.0654221871185792,4.78471990596623,-0.01  
36731487744982,0.989090745619597,NA,NA  
"Gm18214",1.60029255633521,-0.176338433564614,1.52927220075097,-0.1153

08728869864,0.908200419877043,0.943626334155525,-0.0102320417799925  
"Gm4356",74.3766397471624,0.655570277706233,0.298034608186003,2.199644  
80533446,0.0278321056476127,0.0742468731587294,1.70471847463116  
"Gm11166",0.118689431514229,0,4.7847199059606,0,1,NA,NA  
"Vmn1r229",516.121534514138,0.37205059870385,0.192673998144425,1.93098  
499167992,0.0534849084607986,0.122371361789328,0.781564798434709  
"Gm9351",0.703322399005539,1.03479902642812,2.97186256519124,0.3481988  
15970996,0.727690876929418,NA,NA  
"Gm49951",0.442512733634797,0.0326256287575609,2.24338227278376,0.0145  
430536531237,0.988396731040709,NA,NA  
"Gm49832",4.34914617399465,-0.940133330871358,2.40631961681121,-0.3906  
93457470624,0.696023835453971,0.79739073670252,-0.212856020824361  
"Gm6599",0.209018314687702,0.42839859860451,4.78471990596019,0.0895347  
28683045,0.928656954905595,NA,NA  
"Gm18068",0.575558490484935,1.97335710652765,2.23181613376421,0.884193  
404946561,0.376591817884574,NA,NA  
"Gm20008",243.622324622561,-0.344224713524753,0.25251148955509,-1.3632  
0416204132,0.172818175920715,0.298221859819639,-0.416483530105046  
"Gm46576",0.133037321563943,-1.09148944917188,4.7792627781536,-0.22838  
0296258487,0.819350606036027,NA,NA  
"Gm4708",13.1896648861962,0.456429598478136,0.609192455060465,0.749237  
116590409,0.453714301680696,0.594085115450286,0.237677807079652  
"Gm18649",0.425271869959791,2.12678111312937,4.72216199762711,0.450382  
920831196,0.652434357801517,NA,NA  
"Gm9349",0.101327209464785,-0.0723410829985279,4.78471990596623,-0.015  
119188671488,0.987937092365312,NA,NA  
"Gm4701",0.262014147141785,0,4.7847199059483,0,1,NA,NA  
"Gm4766",1.22113985345076,0.654612403124256,1.41175433487974,0.4636871  
91851278,0.642871874963925,NA,NA  
"Gm19283",2.42428534453516,-0.0970458200898638,1.3922325364893,-0.0697  
051803821349,0.944428318465199,0.965725999236126,-0.00338448556126184  
"Gm49911",0.0831598778182101,0,4.78471990595975,0,1,NA,NA  
"Gm49877",9.43226863342301,1.27174991209242,0.706888277693837,1.799081  
90901312,0.072005724912458,0.153271574709946,2.385222831833  
"Gm7818",10.7684703046848,-1.0817205194403,0.472322322771135,-2.290216  
80172515,0.0220087519193733,0.0620753138903428,-3.00654146583615  
"Gpr31c",121.254407964903,-0.878451221564147,0.565289045129245,-1.5539  
8592831974,0.120187773219701,0.22676806679289,-1.30347009403369  
"Gm9210",0.220934797106265,0,4.78471990595636,0,1,NA,NA  
"Gm17891",0.495368907127856,1.09998768497013,2.61043759671667,0.421380  
57096391,0.673477204276607,NA,NA  
"Gm9514",0.126832144503222,1.37312413721579,4.78471990596053,0.2869810  
90681029,0.774126798979208,NA,NA  
"Gm5497",0.240417732005734,-1.15264531073872,4.77738115791474,-0.24127  
1372879495,0.809344796719769,NA,NA  
"Gm4948",0.361703212692456,-0.122744515504889,2.7081038086147,-0.04532  
48930541099,0.963848346036201,NA,NA  
"Gm7773",0.0804673502708677,-0.544048378937456,4.78471990596623,-0.113  
705376621746,0.90947135024012,NA,NA  
"Gm19012",0.293202776824657,1.35595225520628,4.7847199059572,0.2833921



90526776,0.776876214183783,NA,NA  
"Gm50047",4.57959612989186,0.0948324047189771,0.815138076517297,0.1163  
39068742993,0.907383823439234,0.94312968651944,0.00555257767984717  
"Gm7072",1383.54335513529,0.282288013784378,0.118825695210332,2.375647  
90413978,0.017518170055599,0.0519133227467206,0.835058706208506  
"Gm1043",15.283535057255,-0.845725892522562,0.625420684325067,-1.35225  
123459938,0.176294958704254,0.302694531949239,-1.01066876679162  
"Gm18271",0.121527413527064,0,4.78471990595379,0,1,NA,NA  
"Gm49861",0.130961393967575,0,4.78471990596534,0,1,NA,NA  
"Gm49960",3.65859814262695,-1.68239011260282,1.20718745774609,-1.39364  
445994491,0.163424995643212,0.285806849497834,-2.10709107052342  
"Ptp4a1.1",7786.23497765191,-1.39014779842354,0.482259879924831,-2.882  
56986801435,0.00394445649593151,0.0166369913513635,-5.69422146979013  
"Gm49927",0.136659446106509,-0.080408433385632,4.78471990595995,-0.016  
8052540098478,0.986591978396037,NA,NA  
"Gm6467",1.19709934171071,-0.744623536210925,1.58829647114274,-0.46881  
8982941635,0.639199029999181,NA,NA  
"Gm16386",30.4176925053285,-0.814054220913308,0.396896157095625,-2.051  
05090175306,0.0402619899808046,0.098349914803804,-1.88797376114951  
"Gm49804",1.47545358504217,-0.486127643589302,2.77637902334482,-0.1750  
94120616011,0.861005677976814,0.911939198717579,-0.0448121986088241  
"Gm7926",0.293657127282029,0.804802581943297,4.75686134023484,0.169187  
73207368,0.865648979073322,NA,NA  
"AC158774.1",18.4735204167325,0.647939082017265,0.478250521845145,1.35  
481102982897,0.175477771538707,0.30179638259343,0.776232781889976  
"Gm7466",0.139896150021884,0,4.78471990596454,0,1,NA,NA  
"Gm8468",0.119435161700958,0,4.7847199059639,0,1,NA,NA  
"Gm20147",0.140077460095217,-0.548836775033251,4.78471990596623,-0.114  
706144940457,0.908678043123671,NA,NA  
"Gm49986",0.125549152202297,0,4.78471990595339,0,1,NA,NA  
"Gm50059",0.10080670816025,-0.0672811250779785,4.78471990596623,-0.014  
0616642980676,0.988780784888585,NA,NA  
"Rpl19-  
ps7",0.54928511940871,-1.04799277592194,2.3566560162353,-0.44469484248  
112,0.656540297002012,NA,NA  
"Ntn3",81.3231117648157,-1.25127361252159,0.310692079405477,-4.0273753  
1937074,5.64029594979218e-05,0.000634224281597739,-9.21326263345753  
"Gm7720",0.121476062291212,0,4.7847199059656,0,1,NA,NA  
"Gm7464",0.266610441026075,-1.37815850417082,4.76989383436712,-0.28892  
8548941944,0.77263605608905,NA,NA  
"Gm4833",0.386976291755879,-1.03176964186906,2.71338720244926,-0.38025  
1532452768,0.703758709585403,NA,NA  
"Rpsa-  
ps7",0.752886508150629,-1.4142220742259,1.86489152631945,-0.7583401255  
60551,0.448247391837056,NA,NA  
"Gm50083",1.48541418667585,0.954404906084392,2.96384214754447,0.322016  
105640144,0.747440493323424,0.835782134929573,0.17120812303814  
"Gm6643",0.102786321472697,-0.0649500276474007,4.78471990596623,-0.013  
5744680825334,0.989169474113469,NA,NA  
"Gm2424",0.137986538933697,0,4.78471990596107,0,1,NA,NA

"Gm6552",0.377242956521801,-0.537939338833683,2.70123393078576,-0.199145780268354,0.8421487108821,NA,NA  
"4921533I20Rik",0.121821870984685,0,4.78471990596557,0,1,NA,NA  
"Gm50027",0.200917183084813,-1.33435704573017,4.77097174121884,-0.279682445863592,0.77972114724555,NA,NA  
"Gm7059",1.32792270304388,1.50097949265898,1.40364414123138,1.06934474954757,0.284914353358078,0.429114467844577,1.26987603796239  
"Gm19052",0.267089766289443,0.0153283250363737,4.78471990595866,0.00320359923624464,0.997443902002627,NA,NA  
"Gm18085",0.137391911185153,0,4.78471990596419,0,1,NA,NA  
"Gm50045",1.18713199266214,1.6066923326055,1.43755920632219,1.11765298120556,0.263715231435698,NA,NA  
"Gm3946",22.2215909971443,-0.478080858362751,0.410693213471491,-1.16408268430259,0.244390505176719,0.383572894625747,-0.458109316868506  
"Gm6883",0.224863134902326,-0.547387091308849,4.78471990596068,-0.114403162999558,0.908918206748688,NA,NA  
"Gm50041",0.144254438425523,0,4.78471990596571,0,1,NA,NA  
"Gm41780",0.495584050889476,2.08254176413797,2.44277306426007,0.852531819106489,0.393918986394979,NA,NA  
"Gm50060",0.1103057078012,-0.0593644993412396,4.78471990596623,-0.0124071002081472,0.990100820273816,NA,NA  
"Gm18763",0.720002293647976,1.10917699439752,2.84657554345721,0.389653103339182,0.696793078873624,NA,NA  
"Gm50043",0.139463627351181,0,4.78471990596099,0,1,NA,NA  
"Gm7575",3.15408772530851,0.34779457404781,1.19248000717052,0.291656524181941,0.770549253258214,0.851516135741095,0.0559033970714654  
"Rpsa-ps8",0.103647573538232,2.13762449227386,4.75859422941547,0.449213441873239,0.653277691725514,NA,NA  
"Gm19853",4.87637969367814,0.604392029135619,0.815213296767846,0.741391279474844,0.458456230456835,0.598245186818857,0.310509183757748  
"Gm5047",0.114246320147156,0,4.78471990596623,0,1,NA,NA  
"Gm18713",0.0721532113593249,-0.544048378937457,4.78471990596623,-0.113705376621746,0.90947135024012,NA,NA  
"Gm5969",1.57828591213569,0.785996367340029,1.36316055864365,0.576598524917784,0.564210695896448,0.692146731382216,0.289213106066016  
"Hspe1-rs1",8.51246971682135,0.59420614965136,0.674417696055844,0.881065477858038,0.378282381045895,0.523177036858622,0.384947760577117  
"Gm7917",0.220934797106265,0,4.78471990595636,0,1,NA,NA  
"Gm50018",0.087583724926668,0,4.78471990595887,0,1,NA,NA  
"Gm7411",0.323322064395601,1.36048013120039,4.78471990595524,0.284338510496108,0.77615097639162,NA,NA  
"Gm5836",0.114810471722162,0,4.78471990596601,0,1,NA,NA  
"Gm550",1.9043993109587,-1.32886994234009,1.35502429103206,-0.980698243666137,0.326741570253351,0.471632154042038,-0.998720087879219  
"Gm6974",0.332359576591001,-0.183805337309142,3.21393670524789,-0.0571900924523545,0.954393770322058,NA,NA  
"Apbb3",1687.67263496175,0.370821732063575,0.203047495833572,1.8262807455036,0.0678079840093054,0.146479068492515,0.712301355748133

"Gm50319",0.078242068735876,-0.544048378937457,4.78471990596623,-0.113705376621746,0.90947135024012,NA,NA  
"Gm50272",0.22949390078909,0,4.78471990595586,0,1,NA,NA  
"Snhg4",112.05186412076,0.188691588242572,0.237228701171017,0.795399491339563,0.426381155739424,0.569345279729304,0.106283973225187  
"Gm8222",3.21541430496003,-0.602376362038643,1.02611994276459,-0.587042836742564,0.557174937446354,0.686379430794964,-0.226689102555416  
"Rpl37-  
ps1",0.949066910489306,-0.616707299554479,2.06866489405508,-0.298118511764167,0.765612713261001,NA,NA  
"Gm50439",0.125432523382531,0,4.78471990596517,0,1,NA,NA  
"Gm50382",0.257008562370402,0.861718781475801,4.03700654459528,0.21345488840722,0.830972172067816,NA,NA  
"Gm7674",0.68999888751851,1.96914968266447,2.07094910955427,0.950844071242428,0.341683536690687,NA,NA  
"Gm5242",10.0773990402689,-1.11412606028766,0.578736077377964,-1.9251021386732,0.0542165814657416,0.123581354386139,-2.32947671205707  
"Gm50364",0.767747763453852,-1.00589846627564,4.24642015327185,-0.236881521368204,0.812748705861455,NA,NA  
"Gm18963",0.296102409039512,0.370545271031855,3.21772185309761,0.115157645050998,0.908320169618512,NA,NA  
"Gm50438",14.3023363805866,0.38222435850714,0.79912935970208,0.47830098327214,0.632435996635625,0.74771022692223,0.11112782331463  
"Gm50241",1700.44542156696,0.394972746782133,0.419791468492691,0.940878451389992,0.346767151591989,0.491513951856688,0.280535299633955  
"Gm5236",0.189172142392505,-1.12281561249132,4.77813829865886,-0.234990187037172,0.814216349603463,NA,NA  
"Gm18786",0.147584720452783,-1.19613598147574,4.77623172629649,-0.250435081466039,0.802250902680516,NA,NA  
"Gm25432",10.7266475661839,-0.117913087809026,0.587671723342075,-0.200644480796961,0.840976574625516,0.898239455056056,-0.0126542666196341  
"Gm19209",6.38955054242486,0.493746199709054,0.746770330082122,0.661175437506678,0.508499811334524,0.642920950762397,0.218104237137862  
"Gm50388",119.428919873761,0.270777613908024,0.296537746433302,0.913130342308472,0.361173993914274,0.506132177830661,0.184388026118126  
"Gm6252",1.45004127854054,-1.21293371567482,2.17564654958836,-0.557504947623185,0.577182479635744,0.702407057119226,-0.428459361516344  
"Gm7074",0.516701747852415,-0.119174425164229,2.66511015776536,-0.0447165100538112,0.964333273741468,NA,NA  
"Gm8934",0.414121326482713,-0.0579538151594026,3.00898083857264,-0.0192602805629343,0.984633469565253,NA,NA  
"Gm50360",2.26324078691612,0.019766459564571,1.30557053844805,0.0151400931489061,0.987920414914422,0.992123643519782,0.000156304046327416  
"Gm50253",807.400106157635,0.748484646588252,0.316335404390789,2.36611089432026,0.0179760590920938,0.052945196401457,2.19942058506241  
"Eef1a1-  
ps1",1.85006642100227,-0.0526339516099081,1.20690808133623,-0.0436105718603144,0.965214824590575,0.97904389433121,-0.00111472401709303  
"Gm6995",0.0778527997966676,0,4.78471990596551,0,1,NA,NA  
"Gm50135",0.087583724926668,0,4.78471990595887,0,1,NA,NA

"Gm50429",0.220934797106265,0,4.78471990595636,0,1,NA,NA  
"Gm18652",0.46307174521261,0,4.78471990594863,0,1,NA,NA  
"Gm31070",0.37729533529533,-0.654684616558711,3.18135253419256,-0.205  
78813869959,0.836956406850687,NA,NA  
"Vmn1r88",234.814351626689,0.461966019747931,0.307615521781884,1.50176  
433579151,0.133157981941134,0.244497064873174,0.650703149382403  
"Gm6937",0.802261930885321,-2.17975477520245,2.12017890501025,-1.02809  
945427313,0.303903047328514,NA,NA  
"Vmn1r61",1.00914826309998,3.08792951606824,1.52979120548606,2.0185300  
4841084,0.0435360879689464,NA,NA  
"Gm45928",1.69724591667256,-2.8065461823723,3.16817542190083,-0.885855  
676731574,0.375695303001341,0.520781104643833,-1.83106221253703  
"Gm50318",5.1834717166912,0.544717859859468,3.68447575614396,0.1478413  
47293746,0.882467977444862,0.926817162629675,0.0413979954382399  
"Gm6789",4.22509576345335,0.394484731473076,0.764103531372425,0.516271  
310465653,0.605664930932862,0.726519153348486,0.126034097454653  
"Gm8184",1.68130041005651,0.613840006876709,1.35338420516156,0.4535593  
10457176,0.650146045448296,0.761674433344401,0.167109389498934  
"Gm50213",0.22572319220359,1.77859679423441,4.74740269594246,0.3746462  
8727505,0.707923543853338,NA,NA  
"Gm50380",0.252167051671768,0,4.78471990595652,0,1,NA,NA  
"Gm50156",0.253145919611105,2.52055607788897,4.70150114237278,0.536117  
295638236,0.591877487436448,NA,NA  
"Gm2106",5.01673721402667,-0.911361429362048,0.804800739318592,-1.1324  
0630237701,0.257463656441724,0.39844573510019,-0.838620171724746  
"Gm29819",0.414876141816684,-2.53686366675685,4.73783481503546,-0.5354  
47892506963,0.592340180362084,NA,NA  
"Gm18087",0.240622576363538,-0.07281163614367,4.78471990595916,-0.0152  
175336435026,0.98785863345694,NA,NA  
"Gm50155",6.32944823541839,-0.667258277243394,0.726726588103831,-0.918  
169622752346,0.358530069499981,0.503574362131582,-0.45775511718663  
"Tmem223",2689.55279357112,0.51200429581853,0.235962046807025,2.169858  
68171104,0.0300175532575435,0.0787304618530512,1.30137418817232  
"Gm50127",0.288175439335129,0,4.7847199059496,0,1,NA,NA  
"Gm21046",1.53031469486008,-0.0625014198639638,1.62586704442981,-0.038  
4419009402353,0.969335353536739,0.981104700294921,-0.00119228314686497  
"Gm9067",0.128052380661741,0,4.78471990595316,0,1,NA,NA  
"Maskbp3",1378.57555533389,-0.0804285067763286,0.127936288727848,-0.62  
8660621439628,0.52957126358363,0.661855010172503,-0.0331935496943579  
"Gm50116",0.175087618434267,0,4.78471990596069,0,1,NA,NA  
"Gm6409",0.476575101515938,-0.867682192542283,2.31354300667558,-0.3750  
44764691489,0.707627174976883,NA,NA  
"Gm6402",71.2888842450158,0.460487176122734,0.58189205500472,0.7913618  
55110737,0.428732862576566,0.571404196544867,0.25771553688142  
"Gm5246",0.179729357845899,0,4.78471990595838,0,1,NA,NA  
"Gm50220",0.313692409710509,-0.0741845559881552,3.94148136553946,-0.01  
88214909847738,0.984983509532121,NA,NA  
"Gm6813",2.56552345239187,0.50002383177651,1.11213183067467,0.44960841  
6902491,0.652992817976485,0.763594501103844,0.134865622085771  
"Tuba-

rs1",0.896331710470365,-1.60138647762821,2.1710128758097,-0.7376218241  
13299,0.460744289625478,NA,NA  
"Ittrip",843.5402439519,-0.246894400231036,0.212609239409106,-1.161259  
035201,0.245536573294667,0.384659497517228,-0.235882109563763  
"Gm50344",1.36413276643045,0.586452187171362,1.38317052087402,0.423991  
242092687,0.671572200383765,0.77794170408048,0.147260307092448  
"Gm8663",0.759727786090966,1.00495486317676,2.31800144136143,0.4335436  
74841947,0.664619844086005,NA,NA  
"Gm50266",0.98199672607684,1.60804348704845,1.79268366390089,0.8970034  
8111018,0.369717059483376,NA,NA  
"Gm50243",0.0810182756847091,0,4.78471990596022,0,1,NA,NA  
"Gm8714",0.974512220843132,-0.545089820633796,4.10309753668173,-0.1328  
48370227782,0.894313299446207,NA,NA  
"Gm5238",0.674127775787656,-1.72296605003454,2.1354618454352,-0.806835  
324038955,0.419761364795174,NA,NA  
"Gm50129",0.141013259114145,-0.545722331288801,4.78471990596623,-0.114  
055230403,0.909194011518771,NA,NA  
"Gm31907",1.39239994553419,1.90823492414906,2.21285705418459,0.8623398  
96985447,0.388500503973936,0.532774147312126,1.20153478142743  
"Gm17802",0.49001614328727,0.375195608339289,2.36967497027398,0.158332  
09745888,0.874195117018,NA,NA  
"Gm5237",0.0893173561272082,-0.544048378937457,4.78471990596623,-0.113  
705376621746,0.90947135024012,NA,NA  
"Gm18425",0.182732806477027,0,4.78471990596015,0,1,NA,NA  
"Gm17814",0.908770957842572,-2.40528031787099,2.63874400383019,-0.9115  
24692952283,0.362018981061342,NA,NA  
"Gm50233",0.130679271285515,-0.0704783822338365,4.7847199059592,-0.014  
7298867267148,0.988247675782691,NA,NA  
"Gm50139",1.24722377764387,1.10053559167959,3.0627011462552,0.35933495  
9281033,0.719344524621988,NA,NA  
"Gm50387",416.445251086951,-0.150883348758081,0.191697804696981,-0.787  
089601764528,0.431229415972693,0.573462771288744,-0.0839005358234781  
"Gm50327",0.130192763961291,-0.0735219094708894,4.78471990595934,-0.01  
53659798098773,0.987740204400194,NA,NA  
"Gm6978",4.93098803860866,0.0134071635146942,0.765777865377356,0.01750  
79016002734,0.986031429247858,0.991012412756429,0.000121042811661418  
"Gm50367",0.394907717814024,-2.46608485155338,4.73883447978536,-0.5203  
99026822536,0.602785488232893,NA,NA  
"Gm4949",0.615305875616826,-1.28965417686895,2.30984896132037,-0.55832  
8357596055,0.576620184225189,NA,NA  
"Gm5690",0.224366670514203,-0.0591359465973623,4.78471990596447,-0.012  
3593329932742,0.990138930075004,NA,NA  
"Rps2-  
ps8",1.90178469773382,-0.140222185908346,1.19253689601238,-0.117583100  
679922,0.906397995750132,0.942925053407193,-0.00824064420588749  
"Gm3621",0.642937125201975,0.862989193512347,3.11948665167539,0.276644  
618129352,0.782053000911845,NA,NA  
"Gm50390",50.4347175312805,0.321665351747414,0.540667592119671,0.59494  
1062559963,0.55188286800641,0.681867302987654,0.123172164191796  
"Gm3188",0.375350463176384,-0.0718672486263128,3.12956072991848,-0.022

9640051203559,0.981678985125307,NA,NA  
"Gm50144",9.10405979073489,2.24354513205026,0.8055784374738,2.78501140  
011363,0.00535258411525629,0.0209525567314329,8.67241159363496  
"Arhgap26.1",5.26534780782425,0.921309826326914,0.658248387300278,1.39  
963856213237,0.161621580205609,0.28353899637318,1.16122407542812  
"Gm20762",0.594269883702762,0.0337254105529886,3.78199603659299,0.0089  
1735745534256,0.99288507245898,NA,NA  
"Gm50234",0.0721532113593249,-0.544048378937457,4.78471990596623,-0.11  
3705376621746,0.90947135024012,NA,NA  
"Gm46649",0.109534176566558,-0.0686513271314946,4.78471990596623,-0.01  
43480346772004,0.988552317436171,NA,NA  
"Gm50307",0.139896150021884,0,4.78471990596454,0,1,NA,NA  
"Vmn1r55",571.723142403909,0.732805864990946,0.335071104869785,2.18701  
599254799,0.0287413565371298,0.0761618605274471,1.88689776172977  
"Gm29695",2.51935642771248,-4.74785479126453,1.42088329479663,-3.34148  
118191795,0.000833326651639951,0.00511915660166219,-25.0438210305536  
"Gm6192",1.14426668428746,2.40611860610258,1.53054562497993,1.57206591  
350985,0.115935265661476,NA,NA  
"Gm2141",0.0831018353190088,-0.0504476742039298,4.78471990596623,-0.01  
05434957939805,0.991587663349375,NA,NA  
"Gm34432",0.782445134165006,-0.0547336794155317,1.99263954454771,-0.02  
74679279377421,0.978086519988744,NA,NA  
"Gm1859",0.132199598355097,-0.545724214053857,4.78471990596623,-0.1140  
55623898355,0.909193699590397,NA,NA  
"Gm5824",0.560993830316675,-0.661969143661342,2.65589942076808,-0.2492  
44808928006,0.803171420331888,NA,NA  
"Gm46629",0.362634276449535,2.96578272883794,3.67074829156817,0.807950  
448591215,0.41911910789698,NA,NA  
"Gm7662",0.211290327672623,-0.0562128407848579,4.78471990595946,-0.011  
7484078252614,0.990626342416021,NA,NA  
"Gm5234",9.38782707058681,0.0700465428117462,0.82174791082146,0.085240  
9137757639,0.932069864438433,0.957507809105404,0.00304151911073548  
"Gm5521",9.89698724158717,-0.307799969328966,0.580464848694707,-0.5302  
64614681003,0.59592847691952,0.718578444216252,-0.101721857497392  
"Gm50303",0.321869401083471,-2.32575544502301,4.74167373263979,-0.4904  
92508797777,0.623785429488029,NA,NA  
"Gm2518",0.384349814793508,1.60587441858442,3.76146237994172,0.4269282  
14714539,0.669431614234351,NA,NA  
"Rps15-ps3",0.087583724926668,0,4.78471990595887,0,1,NA,NA  
"Gm18371",8.88868175314328,0.911695322447219,0.683308894690228,1.33423  
599419195,0.182126526650597,0.310249719326935,1.06702792889189  
"Gm50204",0.193945979290769,-0.0791152382602341,4.78471990596206,-0.01  
6534977974709,0.986807597509396,NA,NA  
"Gm50310",0.220862779501394,-0.887183771462369,4.78326497423152,-0.185  
476609855782,0.852855224593763,NA,NA  
"Gm4840",14.2629847752813,-0.416304748187579,0.460658039829066,-0.9037  
17534903017,0.366145198727709,0.511177078962686,-0.279356811272189  
"Gm7623",0.974234464575973,0.361214212685048,2.40931725851472,0.149923  
888773257,0.880824664213837,NA,NA  
"Gm46618",0.269692566160464,-0.21601646565712,4.03106968237661,-0.0535

87876836146,0.957263515517164,NA,NA  
"Csflr-ps",0.14728986473751,0,4.7847199059615,0,1,NA,NA  
"Gm9028",15.55294570575,-0.129926384948158,0.507281141297822,-0.256123  
033897447,0.797855836563288,0.870932320082353,-0.0179546582112997  
"Gm8437",20.0741226222437,0.54698329198341,0.349491206023327,1.5650845  
6452235,0.11756308230717,0.222981029068599,0.820840641476812  
"Vmn1r60",332.548345563998,0.86011602995664,0.388825894433364,2.212085  
26044822,0.0269607743626213,0.0725778239020283,2.25616679704729  
"Gm31300",0.365987957066939,-0.563710656487436,3.82685311544568,-0.147  
303969993577,0.882892099061579,NA,NA  
"Gm50131",1.58864919229522,-0.330530820958495,1.61957079559573,-0.2040  
85441561025,0.838286730866627,0.896655738983316,-0.0360553867972851  
"Vmn1r183",57.5935734782248,0.546484054872927,0.357704131565178,1.5277  
543831594,0.126573532051774,0.23557948911278,0.790055762907433  
"Gm2176",0.157099154566479,0,4.78471990596623,0,1,NA,NA  
"Gm8887",6.80700525251132,0.942243234845202,0.763809459439849,1.233610  
32414578,0.217348144063772,0.352713617391213,0.981910575899978  
"Fam220a.1",745.815405912679,-0.303403259589751,0.151665239537814,-2.0  
0047987603715,0.0454484708144766,0.107962266561972,-0.675367614626427  
"Gm18936",2.1620152628605,0.105475629879705,1.6386257269359,0.06436834  
72960821,0.948676932941012,0.968293086870327,0.00339847350762942  
"Gm7105",0.976516610947177,1.85782991580847,1.92383044073998,0.9656931  
69453061,0.334197738439354,NA,NA  
"Tmem179b",819.467249678793,0.457943478391367,0.144724709955102,3.1642  
3835662505,0.00155489396767881,0.00826986431582143,2.19590179814152  
"Gm6942",0.141706961836558,-0.549692667692895,4.78471990596623,-0.1148  
85025350693,0.908536254537817,NA,NA  
"Nsa2-  
ps1",1.78445061535458,2.42247699677745,1.60770728449502,1.506789836769  
54,0.131864535460439,0.242619303408365,3.43086143028108  
"Gm9276",6.43277958618512,-0.513599358958225,0.827235730493206,-0.6208  
6215576304,0.534690322989147,0.666636878171889,-0.208269569144742  
"Gm50150",1.85078869957603,1.01589795471193,1.58202358072827,0.6421509  
55957477,0.52077517331399,0.654215213534963,0.431064711772331  
"Gm8373",0.260467506295664,0,4.78471990595768,0,1,NA,NA  
"Gm19334",0.35237288323048,-1.06530604204033,3.2172883926084,-0.331119  
225894649,0.740554429850836,NA,NA  
"Gm18917",0.45995419605282,-2.14873288936382,3.67620394931101,-0.58449  
7737065575,0.558885487299891,NA,NA  
"Gm6336",3.05451578487928,-0.875725912167131,0.957407283145287,-0.9146  
84823882042,0.360357113696886,0.505594229176216,-0.597263331007327  
"Gpr52",3.20802603981797,-2.1817916844815,1.52237659636329,-1.43314846  
647895,0.151815413207079,0.270649805861902,-2.85144796557763  
"Gm50457",9.87958753847829,-0.44784594007944,0.713867370475068,-0.6273  
51744318284,0.53042869192669,0.662682270841815,-0.184270526218606  
"Gm30645",0.17190072856311,-1.04516574172749,4.78093147344411,-0.21861  
1320311305,0.826952833760346,NA,NA  
"AC139347.1",5.38663959533317,0.842080935547045,0.762335048217399,1.10  
460740000885,0.269329743195315,0.411551044892025,0.747618166162658  
"Gm50456",0.605218416562621,1.05804994448393,2.51620045292787,0.420495

093406715,0.674123813030349,NA,NA  
"Gm32766",0.464054598774449,-0.984925052087882,4.69918493919807,-0.209  
594869074458,0.833983884583609,NA,NA  
"Lrrc70",52.8647852835903,-0.822383274587422,0.361472880573881,-2.2750  
8983047854,0.0229005415949945,0.063888218632022,-2.26206413484978  
"Gm50473",0.094989045194852,-0.052015968572189,4.78471990596623,-0.010  
8712671994297,0.991326154597824,NA,NA  
"Gm50470",33.2814073386447,0.0846594459362669,2.72106750331799,0.03111  
2585716097,0.975179752579308,0.984521038460692,0.00132068832514234  
"Gm2102",0.208309843080664,-0.561923545381789,4.78471990596584,-0.1174  
41262273504,0.906510387722733,NA,NA  
"Gm5038",3.12907547305664,0.74508228105737,0.858265376364368,0.8681257  
5874091,0.385325491100839,0.529865582890687,0.473225541059369  
"Gm50471",0.157502682527355,-1.19648096621745,4.77621924155054,-0.2505  
07965758505,0.802194545266423,NA,NA  
"Gm13301.1",101.776950963287,-0.760986102841673,0.385511844344831,-1.9  
7396296379675,0.0483859543783599,0.113570403090076,-1.65539768194761  
"Gm50483",0.374686322624905,0.0386102722657959,2.72840076103412,0.0141  
512466999759,0.988709315584473,NA,NA  
"Wdr88",1.26171090999248,2.51541040661882,1.75820519539799,1.430669419  
70299,0.152524981471224,NA,NA  
"Gm46575",0.450468225990874,-0.116070644751947,2.128007025463,-0.05454  
4295842582,0.95650151811474,NA,NA  
"Gm10599",389.511389271965,-0.580115148890692,0.457314623160837,-1.268  
52525484773,0.204610437751431,0.337133488906033,-0.630745462839093  
"Gm21679",0.186022334349291,0.4.78471990595357,0,1,NA,NA  
"AC151602.1",10.9894149601474,-0.890613427616091,0.475979817799121,-1.  
87111594717228,0.0613290116583327,0.135839267217332,-1.77791640138186  
"Gm50481",2.09581740134941,-1.11139962919106,1.42375406700536,-0.78061  
2083889397,0.435030682448781,0.577061585576321,-0.6110545002408  
"Gm50474",0.444680830052896,0.88576983842494,2.68507483212911,0.329886  
462688482,0.741485752671876,NA,NA  
"Gm18126",1.03979357119461,-0.0937949282077953,1.43707776505658,-0.065  
2678167378802,0.947960766211506,NA,NA  
"Gm50472",0.184044565791152,-0.547028498868384,4.78471990596388,-0.114  
328217663597,0.908977614688572,NA,NA  
"Gm50464",6.59172114671744,0.424615404548558,0.598370649177911,0.70961  
9372427322,0.477940203058052,0.615408916398709,0.206137330240185  
"AC099860.1",0.234990312388007,1.58181882219306,4.76366461812539,0.332  
059233593893,0.73984453208218,NA,NA  
"Zfp91.1",917.060458278954,3.52932845421904,1.53247366885722,2.3030271  
4228748,0.0212773160010358,0.0603440156201013,9.90927255173452  
"AC121143.1",7.14795808757259,1.05553877875281,0.811663939776588,1.300  
4628233741,0.193442390107857,0.323671133813009,1.19067655628395  
"AC183097.1",0.277486445694094,0.461755678628682,4.76165105012017,0.09  
69738592283089,0.922747153902106,NA,NA  
"AC161757.1",4.37855710640832,-1.705438734211,1.32460694163515,-1.2875  
0550869508,0.197918150793056,0.328941263316066,-1.89623652613427  
"AC131692.1",0.308815341379152,1.76983164460895,4.75114254918383,0.372  
506534225747,0.70951574788647,NA,NA



"AC163638.1",0.123500121486147,0,4.78471990595358,0,1,NA,NA  
"AC160138.1",1.76246100422208,-1.08086377207138,1.53624364252564,-0.70  
3575749413292,0.481697017959165,0.619247607052666,-0.51800404370799  
"AC020971.1",93.6475201152095,-0.617280177860461,0.265737461663125,-2.  
32289483762355,0.0201848025310263,0.0578854654728565,-1.75880959231249  
"AL645861.1",0.125587345690033,0,4.78471990595338,0,1,NA,NA  
"AC163616.1",884.072566035335,0.242596302496421,0.199411019140072,1.21  
656417755938,0.223770079206052,0.359870422662455,0.247936150207784  
"ETV3L",3.24669836735999,0.480346464111337,1.08893658142703,0.44111518  
7334283,0.659129609149026,0.768183450041106,0.126680191255703  
"1700094D03Rik",500.773956598105,0.575201475935253,0.291131073404844,1  
.97574745013695,0.0481833878482969,0.11320396388313,1.25311328412364  
"AL807811.1",2.57316468085093,-0.26347435359587,1.28090185331337,-0.20  
569441203815,0.837029623774951,0.896085411758853,-0.0289082861763915  
"AL627257.1",17.5726693131918,1.75948527139532,1.02958652217339,1.7089  
2414916344,0.0874650005934928,0.178053098932128,3.0362970441447  
"AC118710.1",5.01914400522823,1.74407477058107,0.929483135274394,1.876  
39205531814,0.0606014647014467,0.134564099618359,3.49811625941207  
"AC074312.1",0.133993681331704,-0.551775962287137,4.78471990596623,-0.  
115320431108017,0.908191144715366,NA,NA  
"AL928616.1",4.05190069587173,0.756888234174399,1.05702994420782,0.716  
051837813962,0.473959341038984,0.611639369354564,0.372095668518356  
"CAAA01077340.1",4.133814091443,2.15131588587164,0.833947293791687,2.5  
796784783488,0.0098892341362897,0.0334699335513585,7.30825186661412  
"AC158912.1",0.492391747841783,0.87304620683549,2.38270644432974,0.366  
409470588845,0.714059553884312,NA,NA  
"AC166256.1",0.0949500915947116,2.04836625511614,4.7634299069052,0.430  
019186835683,0.667181684222319,NA,NA  
"BX842667.1",0.181061459444335,1.36711891110862,4.78471990595268,0.285  
726006533378,0.775087984373961,NA,NA  
"Shld3",87.0778819468414,0.269832340850931,0.170687950137264,1.5808517  
2757618,0.113911943893071,0.217729152242634,0.411360323632245  
"AC161166.1",0.762559511177569,0.969560732935595,1.8679734413749,0.519  
044174537065,0.603729936614017,NA,NA  
"AC124742.1",1.03249815664052,-2.80971344539474,3.1901438262022,-0.880  
748203989175,0.378454119989784,NA,NA  
"AC150312.1",79.2884292882019,0.737376417505973,0.261061379578229,2.82  
453275431731,0.00473496084419205,0.0190433718110678,2.92077466387606  
"AC153941.1",0.970625552107487,0.731888617622773,1.60034830786842,0.45  
7330828560446,0.647433274311158,NA,NA  
"AC154607.1",109.285448649972,-0.203546926938531,0.207791304474381,-0.  
979573844311791,0.327296521118038,0.472048788280162,-0.152797168798308  
"Lim2.1",0.14430642271865,-1.19870620812803,4.7761387806117,-0.2509780  
94060849,0.80183104564832,NA,NA  
"AC099642.1",0.121821870984685,0,4.78471990596557,0,1,NA,NA  
"AC175464.1",0.152910604562634,-0.0702814031542227,4.78471990596595,-0  
.0146887183650166,0.988280519829561,NA,NA  
"AC122821.1",4.15821426679799,0.0481385663914455,1.16232102345032,0.04  
14158957983462,0.966964340655157,0.979879980983018,0.00097842518099063

"AL671118.1",0.197036686618655,-0.550915305007701,4.78471990596623,-0.115140554898678,0.908333715484392,NA,NA  
"AL845275.1",0.501205905146727,2.11007668056249,2.47288377458942,0.85328582857188,0.393500816903852,NA,NA  
"AC156021.1",0.657389046673163,1.21189159330084,2.68701616787272,0.451017603760936,0.651976861490328,NA,NA  
"AC142112.1",0.363781101281428,-2.50157075859123,4.73824494822034,-0.527953026052571,0.597531939528094,NA,NA  
"AC167036.1",8.99311174467256,-0.312204488038116,0.633706473872378,-0.492664192193484,0.62224988276928,0.740245772680624,-0.0939026875618655  
"AC147806.1",2.63657514274096,-2.45759572369774,1.47204129712537,-1.66951547385049,0.0950152663520282,0.189933121112553,-4.08227112368411  
"AC134836.1",19.4842952877758,2.11564374139099,0.850823598951298,2.48658328706288,0.0128976375652282,0.0411046317827426,6.75236148784805  
"BX666061.1",12.2310895744971,-0.512947136205129,0.748293721914495,-0.685489028148951,0.49303538184351,0.629342315887709,-0.237535533119586  
"AC147806.2",168.075031555568,-0.563846982837605,0.461076329732728,-1.22289292786826,0.221370140055056,0.357240407713861,-0.580393812811681  
"BX682230.1",0.133581527462463,-0.524038315515944,4.78471990596623,-0.109523300384314,0.912787441898542,NA,NA  
"AC093451.1",2.9998024209174,-0.796698105159729,1.29986922277757,-0.61290635334633,0.539938262094136,0.670726059780292,-0.318196827045475  
"AC123856.1",5.25215856865802,-0.237637368467996,1.2405092295532,-0.19156436954007,0.848083454539491,0.902862746197706,-0.0242829114479463  
"AC154013.1",5.50078676527808,0.123423496522497,0.652867538536334,0.189048297299634,0.850054963449445,0.904369055346608,0.0124062527643625  
"AL935121.1",5.77531732307563,-1.86854479838694,1.27281322236113,-1.46804320190883,0.14209248821446,0.257124764288217,-2.53784604937709  
"AC127285.1",44.0649723975998,0.906719507250748,0.482443231116665,1.87943253997377,0.0601854566853165,0.133884316537399,1.82321269034198  
"AC117663.2",1.98690862916773,0.896588808266418,1.5642283851422,0.573182801682064,0.566520927861286,0.693868734701206,0.327678534801538  
"CT868690.1",422.335971149063,-1.00406361110164,0.540646876188008,-1.85715233976952,0.0632894834925693,0.138951951248983,-1.98164713299149  
"AC240460.1",11.4982202188492,1.88873475282657,0.899988290597863,2.09862147381038,0.0358502818600267,0.0901299469421487,4.54524546187088  
"AL772212.1",3.88403072227828,1.58016075174703,1.25119898427754,1.26291722707834,0.206618928176982,0.3396556666044,1.7062937967461  
"AC167036.2",1.76616697414695,-3.19138238214157,1.49962364477334,-2.12812220803836,0.0333269524644043,0.0852163243111103,-7.85897782299287
