# Supplementary material for: Single-cell analysis of senescent epithelia reveals targetable mechanisms promoting fibrosis
Source: JCI journal article supplement (doi:10.1172/jci.insight.154124), 2022-11-21
Supplement: sd5 [file 5]

| group                   | Sample Name | % Aligned | M Aligned |
|-------------------------|-------------|-----------|-----------|
| uninjured               | E0S02_1     | 85.40%    | 59.3      |
| Late injury and Vehicle | E0S02_10    | 80.10%    | 49.4      |
| Late injury and Vehicle | E0S02_11    | 78.30%    | 50        |
| Late injury and Vehicle | E0S02_12    | 83.80%    | 62.6      |
| Late injury and Vehicle | E0S02_13    | 80.90%    | 49.9      |
| Late injury and Vehicle | E0S02_14    | 75.70%    | 44.5      |
| Late injury and ABT263  | E0S02_15    | 75.00%    | 39.8      |
| Late injury and ABT263  | E0S02_17    | 77.20%    | 47.1      |
| Late injury and ABT263  | E0S02_19    | 77.50%    | 58        |
| uninjured               | E0S02_2     | 86.40%    | 54.4      |
| uninjured               | E0S02_3     | 86.70%    | 54.8      |
| uninjured               | E0S02_4     | 86.80%    | 52.5      |
| Early injury            | E0S02_5     | 69.10%    | 37.2      |
| Early injury            | E0S02_6     | 49.30%    | 24.6      |
| Early injury            | E0S02_7     | 71.60%    | 47.8      |
| Early injury            | E0S02_8     | 75.50%    | 42.5      |
| Late injury and Vehicle | E0S02_9     | 74.40%    | 49.3      |
